# Supplementary material for: Six-gene signature for predicting survival in patients with head and neck squamous cell carcinoma
Source: Aging (Albany NY). 2020 Jan 12;12(1):767–83. doi: 10.18632/aging.102655 (PMC6977678; doi:10.18632/aging.102655)
Supplement: Supplementary Table 1 [file aging-12-102655-s002..xlsx]

## Sheet: 工作表 1 - Supplement table 1
Supplement table 1 ：Amplified 247 genes
cytoband	11q13.3	3q26.33	7p11.2	8q24.21	8p11.23	13q22.1	7q21.3	9p13.3	18p11.31	12q15	9p24.1	12p13.33	5p15.33	2q31.2	6p12.1	Xq28	18q11.2	20q11.22	17q12	11p13	2q11.2	20p12.2
q value	3.0044e-231	1.1035e-49	2.281e-43	7.9935e-22	3.9423e-14	7.034e-10	3.0999e-09	3.5124e-10	3.1499e-07	5.7609e-07	3.8405e-09	9.0417e-06	2.3106e-05	1.3864e-05	0.00014534	0.0003124	0.00067898	0.002066	0.0050541	0.0089375	0.00085983	0.045643
residual q value	3.0487e-231	1.1035e-49	2.5141e-43	7.9935e-22	3.9423e-14	7.034e-10	3.2118e-09	4.6301e-08	3.1499e-07	5.7609e-07	2.6616e-06	9.0417e-06	2.3106e-05	0.00013142	0.00014534	0.0003124	0.00067898	0.0022753	0.0050541	0.0093497	0.013662	0.049378
wide peak boundaries	chr11:70294321-70370364	chr3:181941572-182182654	chr7:54991977-55017273	chr8:127376189-127404433	chr8:38297877-38415948	chr13:73291158-73424227	chr7:93311392-93418292	chr9:35636169-35745564	chr18:2979485-3259989	chr12:68953924-69977272	chr9:5411687-5564747	chr12:1-841062	chr5:1-1419890	chr2:177207594-177364623	chr6:54295693-54321225	chrX:152314452-156040895	chr18:22734234-22756774	chr20:33501436-34328490	chr17:39692293-39763442	chr11:34547052-35348192	chr2:96838226-96948879	chr20:10251665-11301387
genes in wide peak	PPFIA1	LINC01206	[EGFR]	CASC8	FGFR1	[LINC00392]	VPS50	CA9	MYOM1	CPM	CD274	NINJ2	SDHA	NFE2L2	TINAG	ABCD1	LOC101927571	AHCY	ERBB2	CD44	ANKRD39	JAG1
				CCAT2	WHSC1L1			RMRP	LPIN2	LYZ	PLGRKT	KDM5A	SLC6A3	HNRNPA3		ARHGAP4		ASIP	GRB7	SLC1A2	FAM178B	SNAP25
				CASC21	LETM2			TLN1	MYL12A	YEATS4	PDCD1LG2	SLC6A12	SLC9A3	LOC100130691		ATP2B3		E2F1	IKZF3	PDHX	SEMA4C	MKKS
								TPM2	LOC104968399	CCT2		SLC6A13	TERT	MIR3128		ATP6AP1		EIF2S2	MIEN1	EHF	ANKRD23	SLX4IP
								CREB3		FRS2		WNK1	TRIP13	MIR4444-1		AVPR2		CBFA2T2	MIR4728	APIP	LOC101927053	LOC339593
								1		CPSF6		CCDC77	PDCD6	MIR6512		BGN		PXMP4		LOC100507144		LOC101929395
								GBA2		RAB3IP		B4GALNT3	SLC12A7			CETN2		RALY		MIR1343		LOC101929413
								ARHGEF39		BEST3		IQSEC3	TPPP			CLIC2		NECAB3				MIR6870
								CCDC107		MYRFL		LOC574538	EXOC3			TEX28		ZNF341
								LOC101926948		LRRC10		FAM138D	PP7080			DKC1		C20orf144
								MIR6852		MIR1279		LOC100049716	CEP72			DNASE1L1		CHMP4B
								MIR6853		MIR3913-2		LOC100288778	AHRR			DUSP9		ACTL10
										MIR3913-1		LOC101929384	BRD9			EMD		MIR4755
										LOC101928002		LOC102723544	ZDHHC11			F8		RALY-AS1
												LOC105369595	CLPTM1L			FLNA		ZNF341-AS1
													NKD2			G6PD
													EXOC3-AS1			GABRA3
													CCDC127			OPN1MW
													PLEKHG4B			GDI1
													SLC6A19			HCFC1
													SLC6A18			IDH3G
													LRRC14B			IL9R
													LOC100288152			IRAK1
													LOC100506688			L1CAM
													LINC01511			MAGEA1
													MIR4457			MAGEA2
													MIR4456			MAGEA3
													MIR4635			MAGEA6
													LOC100996325			MAGEA12
													CTD-3080P12.3			MECP2
													HRAT5			MPP1
																MTCP1
																PLXNB3
																OPN1LW
																RENBP
																RPL10
																SLC6A8
																SSR4
																VAMP7
																TAZ
																VBP1
																ZNF185
																NAA10
																F8A1
																UBL4A
																TMEM187
																LAGE3
																SLC10A3
																TKTL1
																IKBKG
																FAM50A
																BCAP31
																SPRY3
																ZNF275
																TREX2
																SRPK3
																SNORA70
																PNMA3
																CTAG2
																NSDHL
																TMLHE
																PLXNA3
																HAUS7
																GABRQ
																PDZD4
																FAM3A
																FUNDC2
																BRCC3
																PNMA6A
																FAM58A
																PNMA5
																RAB39B
																GAB3
																PNCK
																ZFP92
																CSAG1
																CH17-340M24.3
																CTAG1A
																MAGEA2B
																CSAG3
																MIR105-1
																MIR105-2
																H2AFB2
																H2AFB1
																F8A2
																SNORA36A
																SNORA56
																DDX11L16
																OPN1MW2
																MIR767
																WASIR1
																CSAG4
																SMIM9
																FAM223A
																CMC4
																MIR1184-1
																MIR718
																MIR3202-2
																MIR1184-3
																MIR1184-2
																MIR3202-1
																MIR664B
																HCFC1-AS1
																LCA10
																OPN1MW3
																LOC101927830
																MIR6858
																LOC105373378
																LOC105373383
