# Supplementary material for: Six-gene signature for predicting survival in patients with head and neck squamous cell carcinoma
Source: Aging (Albany NY). 2020 Jan 12;12(1):767–83. doi: 10.18632/aging.102655 (PMC6977678; doi:10.18632/aging.102655)
Supplement: Supplementary Table 2 [file aging-12-102655-s001..xlsx]

## Sheet: 工作表 1 - Supplement table 2
Supplement table 2：302 genes with significant mutation frequencies
B2M
CASP8
CDKN2A
HLA-A
HLA-B
HRAS
JTB
MYEOV
NFE2L2
NOTCH1
PTEN
RAC1
FAT1
TP53
NSD1
KRT5
FBXW7
ZNF750
PIK3CA
TGFBR2
CTCF
FOSL2
KDM6A
FLG
KEAP1
EP300
CUL3
RASA1
RB1
RIPK4
PEG3
C9orf135
ZNF737
AK5
SPDEF
ZFP36L2
KRT14
PSIP1
POM121L12
NPFFR2
SMAD4
CSNK2A1
MEF2C
COL11A1
ATXN3
ERBB4
FOS
STEAP4
ITGB1
OR8B4
CLEC4E
CDH10
SI
OR4D10
LRRC37B
EPHA2
MTMR8
ZBTB22
HFM1
SLC8A3
TARDBP
CASP6
GJA10
FAT2
TP63
RHOA
SH2D1A
OR1L4
MYH9
HIST1H4K
KRT6A
AGTR1
MYCT1
CSH2
TMEM200A
FTL
PRIMA1
HIST1H2AM
HIST1H2BL
SLC4A8
MAPK1
RPL39L
CCPG1
RIMS2
RPF2
PTH2R
SAAL1
RARG
STK33
POLR2G
PDE1C
EEF1A1
SLC13A3
SPATA16
SNRPN
4-Mar
FCRL4
STK16
LPAR4
CYSLTR2
CKS1B
STX11
RP1
SEMA5A
C6
GABRG1
NEK5
C12orf74
DNAJC14
SERPINE1
DCAF16
DOPEY1
ORM2
DEFB121
NF2
ZNF716
NALCN
ITGA8
RTN4IP1
DUSP27
TTC37
KCNA6
PCBP2
VPS33B
SLC2A2
CFHR4
PPM1D
PMAIP1
CDH9
GRXCR1
TRAT1
GTF2E1
HNRNPL
SERBP1
SLC38A9
RNASE13
CCNB1IP1
NDUFS5
CDH7
XKRX
SMARCA4
HIST1H2BG
PROL1
OR5H6
RBM5
C17orf74
TIGD4
CREB3L3
CREBBP
KBTBD12
HIP1
PLSCR4
CARD6
PIK3R1
C2orf88
HMGN4
SGCE
IDO1
TPTE
CES2
ADCY1
PEX11A
PEX5L
SIAH3
PRSS48
IGFL3
ARSK
LRRC10
IRF6
FARSB
OR5A1
LCP1
SHFM1
PNMA2
BTNL3
TPD52
BMI1
CXCL1
MRGPRX3
USP9X
OR56A1
CSMD3
SLC16A10
PAX5
KLF3
NCK1
PPP4R1
SAMHD1
NEUROD6
7-Mar
ICAM1
ST6GALNAC3
LEPR
SAR1A
DBT
GDPD3
LIN28B
DPM2
PLSCR2
DIAPH2
KLKB1
PTH
RBPJ
ITPR2
NLRP2
OR2M5
SUPT16H
HBG2
FRY
SH3BGRL2
SLCO5A1
TANC1
C10orf10
NOTCH2
MOG
COL22A1
CCDC7
CRYGS
KIF4B
HIST1H2BF
LDHC
EPDR1
IRF2
POLR2L
HNRNPD
PON3
PPP1R2
HSPA8
OCLM
PRB3
IMPG1
LRRC49
DNAL1
SERPINF1
PEX11G
BOC
EIF4G1
OR4Q3
MMP20
KRTAP5-11
RPL22
XAGE5
NUMA1
DOK6
TRMU
PBRM1
CKLF
ARNT
FGF1
GTF3C6
LAMA4
RBM26
NMI
ACTL8
SAT1
UCP3
CYP4A11
C3orf30
TBCEL
CTTN
COL14A1
TMEM138
DUSP18
WTAP
UBXN2A
NXF5
BRF2
FOLR1
HIST1H2AH
RSPO2
DDX3X
ALDH1A2
CHML
ERC2
ZNF211
KIF23
HIST1H2BI
CDK8
CD8A
PDK4
EDNRB
IKBKB
CCDC141
ADCY2
KLRC3
ZNF763
TMEM154
TMEM107
OR4K1
ELAVL1
COPS2
ADIG
CXorf21
MS4A14
PDCD10
HIST1H2AB
RBL1
TFEC
ZNF804B
STC1
PPP4R4
KCNH7
