# Supplementary material for: Six-gene signature for predicting survival in patients with head and neck squamous cell carcinoma
Source: Aging (Albany NY). 2020 Jan 12;12(1):767–83. doi: 10.18632/aging.102655 (PMC6977678; doi:10.18632/aging.102655)
Supplement: Supplementary Table 3 [file aging-12-102655-s006..xlsx]

## Sheet: 工作表 1
Supplement table 3：Infromation of training set
ENSGID	TCGA_P3_A6T7_01A	TCGA_CQ_6218_01A	TCGA_CR_7370_01A	TCGA_CV_7254_01A	TCGA_QK_A64Z_01A	TCGA_CN_6994_01A	TCGA_P3_A6T2_01A	TCGA_QK_AA3J_01A	TCGA_CV_A45Y_01A	TCGA_CV_7434_01A	TCGA_BA_A6DG_01A	TCGA_UF_A7JS_01A	TCGA_CN_6012_01A	TCGA_CV_A6JM_01A	TCGA_CR_7372_01A	TCGA_DQ_5631_01A	TCGA_CV_6938_01A	TCGA_CX_7086_01A	TCGA_UF_A718_01A	TCGA_CR_7368_01A	TCGA_DQ_5630_01A	TCGA_P3_A6T6_01A	TCGA_CN_6995_01A	TCGA_CV_7437_01A	TCGA_CN_4733_01A	TCGA_CQ_5330_01A	TCGA_UF_A71A_01A	TCGA_BA_5151_01A	TCGA_CR_7364_01A	TCGA_HL_7533_01A	TCGA_CR_5248_01A	TCGA_CV_5971_01A	TCGA_CV_7248_01A	TCGA_CV_5978_01A	TCGA_UF_A7JC_01A	TCGA_F7_A61V_01A	TCGA_CV_7435_01A	TCGA_D6_A6ES_01A	TCGA_C9_A480_01A	TCGA_CV_A6JE_01A	TCGA_CR_7374_01A	TCGA_DQ_7592_01A	TCGA_CV_7418_01A	TCGA_D6_8568_01A	TCGA_CV_6953_01A	TCGA_UF_A71D_01A	TCGA_D6_8569_01A	TCGA_BA_5556_01A	TCGA_CV_5435_01A
ENSG00000167578	1.67744	1.52314	1.70206	1.93675	2.18134	1.50934	0.737075	2.18346	2.50439	1.09313	1.82508	2.37207	1.86241	2.50059	1.17859	1.66439	1.92232	1.54786	1.96042	1.76448	2.4388	1.51359	2.07696	2.0189	1.90854	1.78311	2.17072	1.18863	1.30198	2.02258	2.2958	1.93688	1.82365	1.40123	1.26233	1.64161	1.53718	2.228	1.75441	2.87677	1.63876	1.963	1.80234	1.37579	1.07109	1.08395	1.41386	1.59398	1.51251
ENSG00000078237	2.42095	2.91554	2.79246	2.74994	3.02483	2.40003	3.50843	2.25052	2.73807	3.17418	2.63644	0.992067	1.96968	1.58179	3.05891	2.39398	3.58176	3.44898	2.11661	2.70648	2.58118	1.82687	2.28366	2.92003	2.85808	2.4912	2.61608	2.76198	3.21549	3.20785	2.5861	2.51887	2.95169	3.31448	3.51158	2.58829	3.22048	1.91495	2.55804	1.46126	2.9685	3.56586	2.56816	2.46615	5.00256	3.51356	2.74233	2.9367	2.22988
ENSG00000146083	3.74415	3.28029	3.52202	3.33097	3.61964	3.8271	3.94281	3.94991	3.78223	3.66107	3.41126	1.30481	4.12615	1.41639	2.96772	3.23761	3.16172	3.45567	3.96291	3.23603	3.32829	3.23765	3.51334	3.54391	3.73853	3.7682	3.79104	3.02135	3.36649	3.67348	4.16766	2.80673	3.52664	3.25224	2.67859	2.42833	3.08998	1.37155	3.46532	2.10646	3.76758	3.91992	3.91608	2.99353	3.16171	3.34554	3.93383	3.45335	3.25297
ENSG00000158486	0.0907628	0.154518	0.183727	0.131883	0.142781	0.312215	0.0680326	0.517385	0.0700636	0.185786	0.0488635	0.112397	0.463945	0.381261	0.126354	0.121907	0.106108	0.327913	0.2159	0.160603	0.0869574	0.448861	0.214091	0.222184	0.0791903	0.0636311	0.0934115	0.222229	0.140107	0.095248	0.173029	0.0187904	0.241579	0.171571	0.303843	0.0820303	0.198465	0.137637	0.409368	0.0205491	0.323169	0.161587	0.446149	0.0426221	0.302701	0.285285	0.103747	0.0841657	0.0517336
ENSG00000198242	7.3038	6.70801	6.51019	7.3541	6.05345	6.59255	7.35862	6.93435	6.84856	6.49399	7.03603	8.53982	6.61166	8.39773	6.25126	5.87839	7.26054	6.40924	6.98417	5.7099	6.54467	8.05153	6.70821	6.96778	6.59597	6.73492	7.50098	6.85995	7.10032	6.53061	7.4006	6.55308	7.3027	6.43146	6.4222	7.86983	6.54757	8.83051	6.58929	7.91642	7.23562	6.3957	6.99262	6.65351	7.41419	7.5266	6.40591	6.69762	6.45806
ENSG00000134108	4.98445	4.6779	4.95737	4.36696	4.63036	5.26452	5.04332	5.07896	4.76613	4.50291	5.41796	3.60307	4.77692	4.62049	5.28651	4.87916	5.46196	5.01495	4.91251	4.81313	5.0791	5.23083	5.34033	5.08313	4.53836	4.55267	5.30252	5.50895	5.35221	5.2177	5.53411	4.95016	5.28153	5.58208	4.74403	4.70051	4.99826	3.88304	5.91083	4.49511	5.5568	5.18413	4.5643	4.42686	5.54555	6.15792	4.88539	4.9891	4.70887
ENSG00000172137	1.4711	1.98291	0.217951	1.0648	0.59235	1.56105	2.42936	3.14499	5.68277	0.163338	2.96514	1.54681	3.88862	1.19106	2.33652	2.29019	1.69905	1.29249	2.21013	0.235786	2.71195	0.444605	5.0472	1.23272	0.664147	2.30243	2.80601	1.64359	2.54203	1.02906	0.208964	1.19627	1.19621	3.55531	3.46036	2.51749	4.39088	3.57069	1.38182	1.54995	1.10381	0.465977	2.14533	3.16474	1.20341	3.94342	1.68282	1.19303	1.01395
ENSG00000167700	3.2417	3.6279	3.73334	4.16523	3.4703	3.04722	3.18416	2.82032	3.80645	3.79308	3.35449	5.403	3.88233	3.23687	4.17527	2.95267	4.23711	4.41126	4.05696	2.29317	3.20264	4.65523	3.54342	3.27863	3.19294	3.73235	3.54621	3.79204	2.39499	3.27595	2.86799	3.00424	4.0851	3.06857	3.40652	4.04886	2.75942	4.45681	4.43337	3.9567	3.00681	3.20568	3.59433	4.0499	3.70687	3.59196	3.54181	3.34027	3.18927
ENSG00000060642	2.39567	2.25679	2.0963	2.86555	2.66635	2.68764	3.17188	2.52079	2.24761	2.14657	2.50738	1.62232	2.76304	1.68373	2.35631	2.31635	2.50608	2.35385	2.48296	2.66469	2.69139	2.5625	2.78351	2.21131	2.78538	2.43552	1.50308	2.61082	2.45784	2.03917	2.73351	1.84518	2.39426	2.80547	2.47956	2.40904	1.92271	1.50607	2.60717	1.78103	2.65441	1.57118	1.41468	2.24193	2.28015	1.85508	2.5901	2.8378	1.62124
ENSG00000182141	0.121018	0.449332	0.606008	1.21391	1.21344	1.00241	0.412093	1.35866	0.569002	0.033565	0.852728	0.0576403	1.19515	0.203431	0.624893	1.02356	0.747328	0.681015	0.862959	1.45841	1.08761	0.486733	0.162238	0.0644547	0.749568	0.798186	0.726129	0.22979	0.524163	0.909562	1.04362	0.935832	0.842232	1.01976	0.333235	0.316754	0.549263	0.316735	0.575041	0.318259	1.84189	0.691291	0.612386	0.55534	0.399644	0.945197	0.558403	0.372591	0.869122
ENSG00000185105	0	0	0.131126	0.024874	0.010114	0	0.0706297	0.1451	0	0.00853341	0.134019	0.317955	0.152594	0	0.326378	0.129215	0	0.0178868	0.00961035	0.00769548	0.416295	0	0.334054	0.0502326	0.784132	1.21613	0.941157	0	0.0562915	0.0112629	0.0140936	3.16011	0.0423973	0.0933367	0.0318096	1.34819	0.102015	0	0.322547	0.073664	0.0230216	0.285023	0.325636	0.909379	0.0120078	0	0.517129	0	0.326481
ENSG00000102174	0.247909	0.292854	0.24545	0.416619	0.355011	1.35492	0.544116	1.1684	0.289589	0.312803	0.381538	0.0799202	0.757533	0.0296238	0.456245	0.932416	0.388856	0.227148	0.327415	0.401896	0.340252	1.51773	0.0850426	1.80254	0.435732	0.393122	0.369104	0.142088	1.11187	0.125026	0.207853	0.206148	0.787195	0.345052	0.480105	0.231292	0.619195	0.16	0.482539	0.312711	0.207683	0.255352	0.85249	0.307008	0.254691	0.0933328	0.3993	0.372674	0.353949
ENSG00000166391	0	0.0512467	0.149882	0.207789	1.41521	0.0144921	0	0.00565466	0.530108	0	0.0931606	0.0416423	0	0	0.0707369	0.108903	0.123621	0.0159443	0.172504	0.0539653	0.787002	0	0.0632139	0	0.0150102	0.225034	0	0.0150239	0.0469538	0.0847531	0.0896719	0.0290037	0.0152502	0.018962	0.0561924	0.134874	0.0156094	0.161847	1.30215	0.051435	0.331038	0.0470964	0.0338544	0.0194127	0	0.0367078	0.0477986	0.00488636	0
ENSG00000070087	5.69203	3.62962	4.84875	5.29935	5.47025	6.17151	5.61984	3.59066	4.33964	5.26336	5.34416	1.70788	6.528	5.02975	4.22892	6.19204	4.84976	5.02997	5.49822	4.25687	6.11607	5.15347	1.91008	8.01612	4.45255	3.76251	6.39258	5.60085	5.08081	1.88723	2.59368	5.65444	4.5595	6.34365	5.91155	5.01493	4.65467	1.40386	4.48223	5.12027	6.70179	5.19548	5.60131	3.13873	4.22643	5.84768	6.01893	4.19666	5.7507
ENSG00000153561	2.78594	2.73357	4.7641	3.61237	2.76331	2.58697	2.75624	4.88104	2.86415	2.50714	2.59125	1.96487	4.13769	1.74505	4.02907	3.19475	2.62639	4.1583	3.0458	3.87839	2.55086	3.54288	3.14602	4.14496	2.74905	2.86916	4.22554	3.73971	4.21989	3.31876	3.83641	3.72975	4.59505	4.18291	3.20269	3.74479	4.28232	1.882	3.12958	2.30068	4.92078	3.74117	4.22372	2.75621	3.37841	3.99551	3.05227	3.11625	3.57185
ENSG00000179262	5.33589	5.1035	5.87496	5.5608	5.56179	5.39646	5.79823	5.83219	6.02695	5.60777	5.04415	3.96048	5.77543	4.67894	5.0603	5.31769	5.41555	5.81426	5.71844	5.72748	5.37321	6.06092	5.20402	5.45107	5.35133	5.32003	7.56654	5.13836	4.53929	6.87504	5.88081	6.5408	6.02695	5.95182	5.26558	5.35117	5.91669	5.04263	4.88353	4.77904	6.22131	5.56854	6.42344	5.62912	5.12336	5.95464	5.40216	5.22405	5.87996
ENSG00000166368	0	0	0.0558979	0	0	0	0	0	0	0	0	0	0	0	0	0	0	0	0	0	0.0230458	0	0	0	0	0	0	0	0	0	0	0	0	0	0	0	0	0	0	0	0	0	0	0	0	0	0	0	0
ENSG00000206072	0.282014	1.40937	0.689749	0.104574	0.0267499	0.0715928	0.0671834	2.10529	0.294664	0	0.534259	0.0916522	0.772071	0.0507926	1.76402	0.00814964	0.47758	1.08973	0.241524	0.262055	0.0412651	0.51647	0.0830827	0.486028	0.542777	0.288807	3.29027	0.200965	4.84086	0	0.0823719	0.00545779	1.20233	1.08312	1.58926	4.05368	0.232184	0.0091047	0.121956	0.0166575	0.418967	0.0432105	0.191323	1.38299	0.222497	1.6443	0.303213	1.78207	0.0226636
ENSG00000127511	3.37295	2.53184	3.37913	2.65007	3.14683	2.58528	2.87484	2.90554	3.27392	2.63654	3.06327	2.10453	3.32342	2.24327	2.86901	3.43926	2.64365	2.83527	2.97727	2.52194	2.64806	3.35793	1.82392	2.01801	2.56371	2.61273	2.97517	2.69973	2.13705	2.57061	2.74041	2.38537	3.02255	2.6525	3.27521	2.40207	2.43564	1.08567	3.54663	2.12823	3.80044	2.65254	2.68031	3.1516	3.23526	3.30562	2.86291	2.94464	3.00614
ENSG00000095587	0.00918146	0.0366178	0.43646	0.184411	0.0890163	0.147511	0.0699977	0.0508785	0.181605	0.0532065	1.12499	0.419071	0.390181	0.302051	0.137432	2.33762	0.174685	0.0427794	0.135876	0.0322134	0.500235	1.19869	0.174016	0.0780096	0.977621	0.35371	0.237858	0.12657	0.0709321	0.0169485	1.04871	0.396412	0.117082	0.138517	0.120878	0.0950399	0.221218	0.00825931	0.0410849	0.127173	0.205138	0.0219322	0.273795	0.0583493	0.0500288	0.253296	0.0862136	0.0512726	0.0341192
ENSG00000064601	5.06293	4.86248	3.86159	4.82667	5.09802	5.32552	4.16693	4.63834	4.92024	4.21529	5.56811	4.59052	4.7447	3.89994	5.0494	5.63912	4.81066	4.79075	5.03188	4.76437	5.48805	4.33868	5.26625	5.30978	5.35945	6.29534	4.21463	4.84156	5.52492	4.67659	5.04421	4.76854	4.69006	4.97163	4.25778	4.09332	4.59431	3.80839	4.49536	5.78232	4.95378	4.93952	3.76795	4.75824	4.63976	5.0843	4.7261	4.72347	4.76935
ENSG00000008517	2.6854	3.75432	3.27258	4.47077	3.25007	3.06077	3.51011	4.56205	4.44621	2.18552	5.99147	7.79689	3.35649	4.20886	3.16637	4.12692	5.15142	2.30363	4.20572	2.7605	5.9803	3.87346	6.56129	1.95285	5.58692	5.67035	4.30724	3.02966	4.47527	5.9543	5.16005	7.79288	3.79773	3.43571	2.09427	4.88423	4.86385	4.15498	4.32222	5.60773	3.31754	5.1716	3.09403	3.89805	2.25421	3.27761	4.09171	5.74766	2.76017
ENSG00000088179	0.649119	0.991973	2.09691	1.31373	1.01485	1.21948	1.41187	1.2588	0.976005	1.11082	0.696536	0.64137	1.4693	0.916454	1.20384	1.41648	1.72069	1.13732	0.860573	1.32698	1.29369	1.03647	0.795465	1.06894	1.28923	1.09003	1.44014	1.78945	1.3287	1.47533	1.53108	1.27457	1.48668	2.00861	1.17605	1.21938	1.30175	0.535815	1.54124	0.897498	2.04675	1.04754	1.57888	0.934783	1.19428	1.15898	1.22927	1.34271	1.09476
ENSG00000070081	2.01201	2.42653	3.12172	3.36127	2.4875	2.56606	2.68603	2.04546	2.54446	1.52388	2.22751	2.08968	2.75696	2.38767	3.04021	2.69844	2.41583	2.31814	2.5545	2.45636	2.19118	1.46291	2.66829	2.2429	3.14984	1.96672	2.58965	2.40147	3.62304	2.02163	2.57663	2.37772	3.61027	2.62564	1.77466	3.59777	2.35745	2.28338	1.411	2.4681	3.58018	1.89449	2.45643	1.98583	2.42223	1.61695	2.41353	2.04289	2.54014
ENSG00000166634	0.217699	2.98144	0.170967	0.115859	0	0.835698	0.0197532	2.07651	0.504552	0.064386	0.0610248	0.0884524	0.73139	0.0728824	0.376711	0.0234441	0.496182	2.59998	2.31386	2.43915	0.291333	0	0.0559761	1.06374	0.365032	0.359269	1.6817	0.492453	1.60926	0.0428509	0	0.135735	0.126678	1.12322	0.807651	0.709073	0.331547	0	0.39154	0	0.63865	0.445185	0.206386	0.386385	1.79055	2.16271	0.384577	0.0467892	0.0645933
ENSG00000161558	0.826475	0.785646	1.30636	1.24408	1.10706	1.28995	0.797325	1.69986	1.04866	1.14891	0.657088	0.773656	1.41992	1.38094	0.621605	1.31981	0.772909	1.02845	1.11006	1.30898	1.195	1.21952	1.74405	1.6898	1.17089	1.29759	1.10918	0.480383	0.602123	1.3745	1.84594	2.24364	1.05761	1.12676	0.774584	0.792897	0.882442	0.179853	1.11093	0.972748	1.41786	1.72284	1.31697	1.41904	0.485079	0.630018	0.803994	0.968013	0.938917
ENSG00000276644	0.103039	0.242814	1.37417	1.0884	0.0410737	0.297183	0.0509724	0.198868	0.0787747	0.0686098	0.379135	0.104301	0.267294	0.0234459	0.322941	0.24906	0.0326715	0.0952932	0.311307	1.00013	0.179725	0.12065	0.048796	1.40689	0.320789	0.358005	1.68244	0.316403	0.253838	0.0306164	0.0319426	0.692498	0.482546	0.626333	0.0575178	0.141427	0.152379	0.108565	0.116397	0.0340664	1.63148	0.205291	1.52979	0.309532	0.209514	0.136144	0.107846	0.0480616	1.28512
ENSG00000268465	0	0	0	0	0	0	0	0	0	0	0	0	0	0	0	0.0336963	0	0	0	0.0421898	0	0	0	0	0	0	0	0	0	0	0	0	0	0	0	0	0	0	0	0	0	0	0	0	0	0	0	0	0
ENSG00000118972	0.00826837	0	0	0.060036	0	0	0	0	0.0110783	0	0.0087719	0.111465	0	0	0	0	0	0.0361887	0	0	0	0.0171818	0	0.0165576	0.020546	0	0.00953548	0	0	0.00917963	0.0228869	0.00668106	0.00699157	0	0	0	0	0	0	0	0	0	0.0688006	0	0	0	0.013269	0	0.01853
ENSG00000179833	3.86599	4.04323	3.70543	2.9697	3.82439	3.9139	3.25224	4.62132	4.02115	3.10669	3.24687	1.82264	4.05639	3.07984	3.76178	3.37677	2.98823	3.87485	3.68384	4.19652	4.08691	2.4058	4.5148	3.5039	3.11528	2.95435	3.80593	3.99748	4.88366	3.13382	4.21568	3.35574	3.40117	3.52955	4.06513	3.05522	3.3239	2.89184	3.48497	2.71034	3.82454	3.59728	3.39305	3.70959	3.98099	4.16772	3.947	3.21642	3.35268
ENSG00000064225	1.71067	1.36895	0.671543	0.827809	1.70267	0.808123	0.6978	0.155414	1.54606	0.507982	1.70218	0.415893	0.568599	0.40377	1.49252	0.264776	1.04951	0.477752	1.01918	0.855269	1.44797	0.6288	0.280269	0.14439	0.632956	0.740291	0.5189	1.01175	0.454367	0.667412	0.638236	2.39006	0.597373	1.48007	1.44883	0.303641	0.659928	0.765181	1.20106	1.47767	0.747676	0.568055	0.523673	0.83928	0.764828	0.359203	0.975831	0.576577	0.369166
ENSG00000057294	1.33884	1.76518	3.35961	3.61609	2.13767	2.60446	4.36456	0.467921	1.13904	0.87203	2.19215	0.291285	2.53485	0.668314	1.79018	3.27243	3.2332	1.45843	1.79211	1.57371	2.63874	0.916981	2.55327	1.90789	2.46401	2.35092	1.64934	3.05512	3.67753	1.7627	0.517711	1.76332	2.45904	1.41982	3.26206	0.697211	1.49889	0.392091	2.51317	0.509492	1.06286	2.78399	2.46977	2.34032	2.66135	1.71226	2.3886	2.71998	3.71095
ENSG00000167768	10.6594	11.1736	2.46259	2.31041	6.201	4.46124	2.28287	1.25402	2.22778	8.07062	5.18201	5.86443	4.8258	4.71033	10.9601	0.660527	5.87371	4.92166	6.69144	8.91872	4.87801	1.5736	1.18491	1.9809	7.57772	5.33012	5.02345	5.574	2.02367	0.0761487	0.598381	2.23588	0.984192	0.968952	10.5196	0.540777	0.366871	5.12531	11.6433	6.45673	7.76843	9.79296	0.417645	2.14217	6.77096	6.52022	8.72289	8.14647	0.0224467
ENSG00000260371	0	0	0	0	0	0	0	0	0	0	0	0	0	0	0	0	0	0	0	0	0	0	0	0	0	0	0	0	0	0	0	0	0	0	0	0	0	0	0	0	0	0	0	0	0	0	0	0	0
ENSG00000022567	1.5689	1.127	2.10071	1.56635	1.72428	1.12085	1.2104	2.26849	1.5198	1.92349	1.3397	1.98271	3.07933	1.54757	1.50406	2.14002	1.39763	2.63912	1.79715	2.14286	1.19369	2.28103	2.36477	1.90375	1.78303	1.41279	1.47919	1.35918	1.98334	2.5577	1.08683	1.4202	2.78872	1.65252	1.09082	1.19509	2.15622	1.68499	0.563292	1.22577	3.02788	2.37548	2.712	2.39506	0.613364	2.12913	1.99289	1.16547	2.86964
ENSG00000120662	0.854702	1.13503	1.94357	1.68218	1.69086	1.35985	2.06624	2.1914	1.30909	1.27944	1.26259	0.506661	1.18183	0.402529	0.594481	1.53861	1.43894	1.03831	0.8615	1.47851	1.24656	1.90642	1.5118	1.43326	1.04615	1.0902	1.22916	1.019	0.950049	1.43843	1.35854	0.964881	1.19304	1.34871	1.22716	1.72288	0.734886	0.278835	1.5595	0.624772	1.50458	0.808111	1.16408	1.13555	1.1007	0.910253	1.72942	0.836752	1.72936
ENSG00000164283	1.38	1.96102	2.03265	1.94378	0.307321	0.865343	2.31653	0.172052	1.26728	1.14535	4.70517	0.459221	1.05126	1.34938	1.04349	2.41025	0.438245	1.249	3.12389	1.64694	1.85058	1.25212	1.73935	0.812452	0.551697	2.0582	1.36004	1.50223	1.71964	1.69482	0.393276	1.16165	2.11959	1.15659	1.40988	0.963881	2.12739	1.75286	1.26984	2.14281	1.11036	0.980345	2.11454	1.46365	0.457881	1.496	1.39205	0.544513	1.25683
ENSG00000013392	0.562876	0.78538	1.09499	1.21687	0.908848	0.440578	1.2757	1.39401	1.40416	0.824694	1.65234	0.710788	1.03022	0.993119	1.05567	1.08491	0.867266	0.820317	1.22817	1.02063	1.463	1.21003	0.763605	0.49984	1.60165	1.09693	0.823546	0.80202	1.45954	0.804118	0.985226	1.21462	1.27356	1.28727	0.804419	1.12829	1.16781	0.921212	0.660402	1.18065	1.87855	0.829478	0.731696	0.781444	0.491644	1.43795	1.24969	0.640479	0.966022
ENSG00000184178	2.07682	2.6779	2.46361	2.70995	3.7111	2.60655	3.13927	3.08436	2.46693	2.69707	2.26207	1.98394	2.62744	1.64188	2.45387	3.18047	2.91823	2.53951	2.92839	2.4635	2.47426	3.45367	2.92873	3.21835	2.59349	2.6209	2.83829	2.96696	2.80866	2.40776	2.1504	2.97317	2.6219	2.9949	2.51454	3.17361	2.30572	1.55557	1.69878	2.61375	2.26075	2.33842	2.61279	2.88566	2.31233	2.31443	2.70782	3.01763	2.4339
ENSG00000166913	6.3748	6.54507	5.79334	6.20124	6.82212	6.67069	6.68227	6.69689	6.44068	6.55579	6.69157	6.19133	6.12304	5.92071	7.03537	7.72718	7.03326	6.64068	6.37977	6.76086	6.73817	6.13454	6.92212	6.64983	6.72481	7.38538	6.35581	7.02821	6.78515	6.79788	6.67106	6.12461	6.65123	6.80382	6.44163	6.47626	6.67657	6.69967	6.67293	6.39068	6.91359	7.13784	5.71878	6.38576	6.47175	6.56861	7.26477	6.90868	6.8124
ENSG00000164112	0.040796	0.0560205	0.0344532	0.108018	0.0406704	0.0870311	0.0896184	0	0.0329183	0.0207208	0.173536	0.111252	0.0591537	0.1499	0.0327037	0.0539185	0.0995389	0.0643748	0.321815	0.0124895	0.0988606	0.0508442	0.015992	0	0.0997318	0.0891411	0.0834708	0.0154205	0.00930191	0.0890975	1.35388	0.0524993	0.041369	0.0386646	0	0.0598491	0.0561743	0	0.0920515	0.0102024	0.160497	0.0697678	0.0155443	0.0525321	0.0576394	0.0824128	0	0.0526236	0.027652
ENSG00000130204	5.29457	4.61048	4.8914	4.50192	5.07579	4.08474	4.26005	4.50966	4.4659	5.02839	3.87474	5.23259	4.48946	6.53126	4.12115	4.55906	4.8988	4.82407	4.437	4.27861	3.91751	5.53738	5.4014	4.95922	4.22442	4.92939	5.24582	4.21149	4.69082	4.98204	5.02128	3.80573	5.17578	4.9505	4.54123	5.15739	4.97648	4.6699	4.03897	5.56951	4.34676	5.23956	5.51927	5.25194	4.45413	4.26531	4.96326	4.5822	4.62611
ENSG00000189099	0.0250846	0	0	0	0	0	0	0	0.0335434	0	0	0.0577659	0	0	0.0250655	0	0	0.0867989	0.0237678	0	0	0	0	0	0	0.0347234	0	0	0	0	0.0347764	0	0	0	0.0394242	0	0	0	0	0.148605	0	0	0.114775	0	0	0	0	0	0.0281781
ENSG00000111863	1.21724	1.57527	0.172231	0.513457	2.48009	2.79089	2.0413	1.18706	2.89986	1.33626	2.85251	0.636857	0.548493	2.2218	1.01669	2.95051	1.20242	0.340284	1.00111	0.786947	2.70042	0.0972088	2.95713	0.259745	1.6476	0.890171	0.32837	1.74826	1.43126	1.9793	1.08554	1.06372	0.38275	1.1206	1.78358	0.538713	1.65287	2.97278	2.43976	0.853372	0.480657	0.674207	0.278729	1.61691	0.978386	0.185331	1.30934	0.67404	0.0855674
ENSG00000164182	4.0343	3.95516	2.95249	3.54809	3.90791	2.83646	5.09489	3.23864	3.72913	3.69896	4.12377	4.77711	2.43777	4.88468	3.15788	3.29749	4.06065	3.00457	4.08817	2.2436	3.29093	5.07963	3.8668	4.23491	3.46813	3.72249	3.84221	3.61941	2.75917	3.67391	3.70368	4.19925	3.87304	2.89944	2.89508	3.04664	3.17679	3.9058	3.274	3.91409	3.9434	2.3472	3.21884	4.01696	3.70257	3.27354	3.88407	3.61996	2.15461
ENSG00000109618	0.880175	0.878254	1.37178	0.986134	1.26045	1.66255	1.25074	1.26811	1.13639	1.26116	0.953264	0.680719	1.29203	0.686362	0.643231	1.00085	1.37815	1.3252	1.01448	1.67148	1.4486	1.95954	0.990655	1.05579	1.43947	1.11604	1.00603	0.849017	1.27423	1.44946	1.50546	1.27405	0.956825	1.07529	1.10854	0.72021	0.664679	0.678739	0.917883	0.885291	1.83057	1.43242	1.26827	0.922363	0.910859	0.957061	1.27408	1.0213	0.650464
ENSG00000214866	0.0139912	0	0	0.0342368	0	0	0	0	0	0	0	0	0	0	0	0	0	0.0123736	0	0.0106159	0.0286863	0	0	0	0	0	0	0	0	0	0	0	0.0352157	0	0	0	0	0	0	0	0	0	0.0132146	0	0	0.028533	0	0	0
ENSG00000153015	3.0023	2.72824	2.53104	2.65742	2.76511	2.51755	3.53246	2.34636	2.86814	2.85175	2.8183	1.6202	2.1155	2.52976	2.29617	2.63635	2.8588	2.28026	2.97959	2.39801	2.29691	3.03947	2.60266	3.05033	2.49899	2.73882	2.47488	2.52425	2.45613	3.06804	3.11623	2.77703	2.62083	2.56014	2.28769	2.58088	2.80309	2.92965	2.4693	2.33825	3.51595	2.62011	2.21527	2.83426	2.65678	2.26668	3.2958	2.3248	2.10659
ENSG00000089116	0.0779382	0.1193	0.689524	0.202221	1.85052	0.423284	0	0.676424	0.351004	0	0.16066	0.601376	0.121352	0.863441	0.0472306	0	1.02633	0.477683	0.34268	0.122133	0.657803	0.0492286	0.112229	2.01554	0.443773	0.525514	2.55898	0.594105	0.0618668	0.199059	0	0.484361	0.270745	0.71334	0.167033	0.371554	0.917243	0.697305	0.0653897	1.96783	0.560181	0.188836	1.36898	0.638044	0.28326	0.740945	0.762158	0.562005	2.15037
ENSG00000036448	0.234935	0.37249	0.341426	0.469229	0.368922	0.260895	0.0872877	0.154174	0.543896	0.0867095	0.542119	1.88322	0.340105	0.141626	0.672623	0.0991676	0.0677291	0.206828	0.232013	0.346856	0.729489	0.120406	0.980898	0.590366	0.630974	2.10285	1.61634	0.127013	0.0965933	0.072901	0.27313	6.3271	0.3113	0.52028	0.198407	1.28086	0.342306	0.11039	0.850215	0.121849	0.572487	0.927297	0.642728	1.80777	0.109086	0	1.18363	0.0835926	1.14934
ENSG00000267552	0.0315326	0	0	0	0	0	0	0	0.0421343	0	0	0	0	0	0	0	0.109186	0.0279064	0.0298809	0	0	0	0	0	0	0	0	0	0	0	0	0	0	0	0	0	0	0	0	0	0	0	0.0589818	0	0	0	0	0	0
ENSG00000106038	0.0074444	0	0.0494571	0.0182764	0	0.00896181	0.00756089	0	0.00997531	0	0	0	0	0	0.0148392	0.00898073	0	0	0	0	0	0	0	0.0659218	0	0	0	0	0.00839184	0	0	0	0.0496039	0	0	0	0	0.0100328	0.00777221	0	0.041915	0.00536238	0.140888	0.0120125	0	0	0	0	0
ENSG00000164114	0.0554316	0.210578	1.36148	0.803778	0.0767872	1.38989	0.12105	0.0672479	0.278292	0.078578	0.547297	0.125962	0.294265	0.678636	0.243617	0.213585	0.0877517	0.890195	0.234146	0.243731	0.343008	0.26798	0.0826865	0.0391842	0.427139	0.325358	0.171897	0.284148	0.646505	0.0493527	0.316369	0.544661	1.06181	1.76506	0.0654372	0.123242	0.612301	0.0113891	0.0234112	0.0914248	0.996734	0.137623	1.40172	0.243167	0.0813224	0.268708	0.832534	0.184407	0.10713
ENSG00000149089	1.49576	1.29268	1.81322	2.28232	1.77959	1.19406	2.47995	1.80127	1.37596	1.14608	1.58177	0.36477	1.39421	0.285942	1.37733	1.52466	1.84411	1.2728	1.23536	1.96955	1.55701	1.74163	1.62932	1.34138	1.79485	1.35723	1.42222	1.08291	1.82072	1.69024	1.33809	1.81335	1.23531	1.6098	1.47848	2.02289	1.85524	0.597373	1.18437	1.289	1.84068	1.0588	1.90563	1.28958	1.14067	1.02804	2.03138	1.09713	1.1816
ENSG00000179632	5.60317	5.29303	5.52688	6.04304	5.90739	5.96298	4.83957	5.54494	6.24214	6.3075	5.62202	6.66084	6.02381	6.45354	5.79367	5.57837	5.67077	5.59952	6.10811	5.27496	5.74574	6.78979	6.02622	6.18452	5.59515	6.37359	6.05995	5.63506	5.04272	5.65177	5.83788	6.19598	6.14373	5.57373	5.18717	5.09414	5.44796	5.79328	5.38873	6.69877	5.74269	5.66757	5.712	5.72216	5.05436	5.11872	5.30302	4.99828	5.44678
ENSG00000114861	1.52224	1.46261	1.77117	2.75546	1.70762	1.82951	2.90794	1.90109	2.28138	1.28257	2.16192	1.87393	1.84569	1.37327	1.77093	2.09428	3.10152	1.68795	1.24013	2.12365	1.96049	2.33442	2.38871	1.74656	2.46426	2.07094	1.27068	2.58465	2.13712	2.35392	3.0236	2.51427	2.05124	2.24456	0.890995	2.85615	2.62952	0.807614	2.66753	1.99599	1.79329	1.62968	1.93886	1.68231	1.7965	2.38656	2.15444	2.3537	1.32856
ENSG00000205030	0	0	0	0	0	0	0	0	0	0	0	0	0	0	0	0	0	0	0	0	0	0	0	0	0	0	0	0	0	0	0	0	0	0	0	0	0	0	0	0	0	0	0	0	0	0	0	0	0
ENSG00000138193	0.285267	0.179508	1.98304	0.996958	0.346128	0.772738	0.651708	2.32262	0.483309	0.177956	0.541709	0.415148	0.988691	0.296941	0.824678	0.320744	0.507263	0.54722	0.398341	0.317967	0.473921	0.786008	0.670614	0.680264	0.9392	0.961358	0.991309	0.358389	1.46597	0.281369	0.827668	2.0265	0.716748	0.609628	0.124918	0.400888	0.690347	0.0907896	0.486318	0.221368	1.58961	0.519762	0.557652	0.910109	0.100897	0.356237	0.427817	0.303205	1.67855
ENSG00000243073	0	0	0	0	0	0	0	0	0	0	0	0.179657	0	0	0	0	0	0.0120501	0	0	0	0	0	0	0	0	0.0157092	0	0	0	0	0	0	0	0	0	0	0	0	0	0	0	0.0508019	0	0	0	0	0	0
ENSG00000152942	2.37155	2.44569	2.36674	2.43818	2.88405	2.39369	3.00959	2.48444	2.65856	2.43394	2.35121	1.72774	2.22878	1.44621	2.16348	2.62649	2.69006	2.25104	2.63371	2.25237	2.17898	2.95515	2.44718	2.8784	2.60882	2.51339	2.45292	2.63857	2.48535	2.96855	2.95697	2.52844	2.55207	2.64769	1.75062	1.96919	2.20774	1.77366	2.64031	1.83998	3.47629	2.14974	1.96002	2.27769	2.49525	2.15778	3.16005	2.27872	1.86045
ENSG00000118363	2.50362	3.23755	3.92279	4.18602	3.7452	3.62731	3.82292	3.22173	3.74212	3.33212	3.4032	2.45898	3.26757	3.03475	3.94465	4.73504	3.41063	4.10917	4.43949	3.62616	3.75331	3.81963	3.14848	3.4686	4.01781	3.45122	3.24436	3.22063	4.27599	3.01903	4.37349	3.1909	4.01942	4.01099	4.42987	4.43652	3.5743	2.10812	3.13033	2.91905	4.28462	3.45047	4.27924	3.68428	3.12821	4.25544	3.37305	3.19696	3.34455
ENSG00000136169	0.682778	1.04427	1.62675	1.58821	1.25577	0.910082	1.20371	1.97743	1.46793	0.707734	1.04151	0.822426	1.31487	0.834619	0.732803	0.995582	1.32828	0.908465	0.669405	1.46257	0.998799	1.52548	1.36164	1.33379	1.65185	1.10734	1.24282	1.28326	1.13427	1.09531	1.7835	1.2138	1.28961	1.5615	0.824838	0.757445	1.08354	0.266906	1.29977	0.983278	1.73285	0.734441	2.45704	0.852831	0.940974	0.829706	1.31415	1.12828	1.02435
ENSG00000121644	3.0725	3.2754	4.40844	4.22665	3.31288	2.94045	3.53229	4.68854	3.96384	3.81139	3.30059	2.85398	4.05328	2.41973	3.52616	3.69163	3.14528	4.02753	3.71459	3.88355	3.39193	3.50463	3.04461	3.47534	3.52406	3.43665	3.87587	3.58772	4.10686	4.0259	4.15587	3.54386	4.225	4.36355	3.29095	3.26105	4.07841	1.99604	3.05119	2.40523	4.60365	3.3746	4.64778	3.56526	3.23763	4.30244	3.50574	3.18974	3.96129
ENSG00000135903	0.172871	0.00929108	0.0623568	0.0328998	0.172362	0.0193873	0.0109312	0.00505278	0.00722623	0.627141	0.0780895	0.109009	0.00655386	0	0.0320265	0.304509	0.137382	0.0744366	0.0403559	0.226819	0.438216	0.097934	0.0816168	1.09197	0.141142	0.447857	0.0964189	0.00673033	0.286342	0	0.00749437	0.771918	0.00910215	0.016952	0.0253712	0.433163	0.0414607	0.00726795	0.0334498	0	1.70742	0.126485	0.33527	0.333654	0.0253646	0.289895	0.171716	0.117518	0.0120977
ENSG00000138495	4.21242	3.49405	2.46882	3.28221	3.67255	3.82269	3.53932	3.51127	3.5914	2.90665	3.77014	4.49686	3.89045	3.89258	3.40928	3.70913	3.41618	2.91258	3.7067	3.37258	4.01639	4.30097	3.61485	2.95613	3.09315	3.14622	4.68338	3.11357	3.0157	4.24627	3.02562	4.5296	3.78005	3.39471	3.10544	4.33314	3.02223	5.62148	2.81676	3.47864	2.63793	3.16657	3.93525	3.13475	2.9065	3.94381	4.3872	2.70229	3.02818
ENSG00000169992	1.58811	1.81062	2.85585	2.89435	1.6947	3.23304	2.14578	1.59635	3.5346	1.83363	3.84016	1.89352	2.7321	1.96031	2.56227	3.74337	1.50325	2.20671	2.63796	2.23988	2.45833	1.4086	1.47008	2.47512	3.12202	3.27465	3.58953	2.13233	1.65045	2.32053	2.45024	3.07352	3.56513	2.97766	2.54058	1.68507	3.1141	0.437382	1.9359	2.93782	2.81507	1.70332	3.06559	2.82001	1.1419	2.73064	2.34193	1.61213	4.29432
ENSG00000253309	0.0285036	0	0.244834	0.0117751	0.0377644	0.10044	0.0943116	0.0529664	0.0255117	0.0397787	0.0202213	0.022179	0.0116222	0.0480342	0.0095566	0.122089	0.145989	0.0252228	0.0709301	0.0847295	0.0676028	0.0394591	0	0.0191434	0.0586566	0.0651443	0.0649427	0.0413461	0.0214803	0.0211573	0.052428	0.015416	0.0865641	0.0593467	0.0150774	0.0691701	0.00827861	0	0.169936	0	0.105411	0.138211	0.0620697	0.045791	0.0113199	0.0195352	0.0751379	0.0154529	0.0320142
ENSG00000101323	0.0140148	0	0	0	0	0	0	0	0	0	0	0.125581	0	0	0	0	0	0	0.0132764	0.0106338	0.0144386	0	0	0	0.017466	0	0.0161576	0	0	0.0309459	0.0194584	0	0	0.0437867	0	0	0	0	0	0	0	0	0.0263533	0	0	0.0285807	0	0.0113558	0
ENSG00000127564	3.34567	3.04047	2.96998	2.05472	2.85562	2.57324	3.49918	3.72765	2.93288	3.94399	1.44474	3.70832	3.68658	4.01814	2.78766	2.18319	2.9041	4.02642	2.67757	3.29941	1.61322	4.40682	4.00922	2.30281	3.0146	2.68205	3.21371	2.02599	1.11742	3.75103	4.00546	2.1923	3.136	1.84575	3.26297	2.77924	2.08434	1.24562	2.73545	3.15858	2.20568	3.08207	3.31483	4.55079	1.77229	2.99733	3.87983	2.76245	2.9828
ENSG00000176973	4.50316	3.99513	3.78266	4.32815	4.19876	3.80116	3.47749	4.25506	4.6855	3.42509	5.14262	5.12593	3.63069	4.44738	4.14495	4.63782	4.01759	3.31151	4.77671	3.44868	5.04957	4.77932	3.26999	3.30399	4.20383	4.17021	3.86005	3.04197	3.94065	3.87401	4.33139	5.099	4.04667	4.6253	3.54985	4.91907	3.91869	3.75337	4.43275	5.87021	4.04065	3.63706	2.96491	3.97183	4.14659	4.76502	4.08004	4.01174	3.69012
ENSG00000159479	4.25769	4.39255	3.36579	3.6862	3.95457	3.7183	4.585	3.87832	3.91496	3.72758	4.27082	3.70027	3.56034	4.29309	4.16888	4.13252	4.04218	4.75811	4.38526	3.96975	4.53091	4.12716	4.00638	4.38443	4.03356	3.9355	3.74149	4.31904	4.13647	3.77939	4.182	3.45519	3.95407	4.14546	5.05495	4.53804	4.11146	4.74394	4.49153	5.07702	4.33567	4.4055	3.42088	3.78055	4.54969	4.33985	4.33498	4.09364	4.12379
ENSG00000112511	3.01287	2.71105	2.84206	3.5708	3.09263	3.31013	3.30849	3.2206	4.34697	3.00347	3.57751	2.92297	3.70392	2.52384	2.54701	3.33468	2.88951	2.62171	3.68992	3.70835	3.80147	3.69324	3.40003	2.9051	3.76208	3.35317	3.63851	2.54091	2.99225	3.82127	3.9335	3.76413	3.39954	3.1282	2.47215	2.70246	3.21486	3.38606	2.35475	3.70722	3.45436	3.09802	3.69661	3.37232	2.68549	2.89847	3.32014	2.66673	4.80024
ENSG00000196381	0.10022	0.0236832	0.0571555	0.242674	0.0934678	0.0165716	0.0209297	0.106211	0.0986229	0	0.35601	0.123485	0.0897054	0.07714	0.125717	0.0207284	0.0244088	0.0481128	0.03879	0.106115	0.260222	0.0426302	0.0266416	0.00693088	0.139768	0.13739	0.100213	0.10416	0.0232182	0.0675482	0.111104	0.236533	0.165562	0.193868	0.0108873	0.0419583	0.0814652	0.00930292	0.0566674	0	0.354727	0.04414	0.0450216	0.0331626	0.016296	0.0556391	0.0652381	0.0277368	0.00775959
ENSG00000154511	3.01074	2.69625	3.01422	2.51496	2.95257	2.44384	2.85287	2.29954	2.74686	1.54366	3.44345	2.2122	2.30585	2.01003	2.61479	2.96674	2.7226	1.82361	3.14483	2.41404	3.57359	2.32548	3.20768	2.72153	3.20487	3.13274	4.06077	3.04877	3.25254	1.92537	2.30972	2.73957	3.68885	3.42305	2.74216	2.57168	3.73326	1.03719	2.7953	1.78986	2.60059	2.88487	2.73652	3.3163	2.55052	2.57752	2.87798	2.65678	3.90542
ENSG00000144504	0.495277	0.198315	0.848876	0.626472	0.950573	0.550124	0.774638	1.59572	0.93826	0.455224	0.458034	0.667122	0.971787	0.626945	0.66537	1.0591	0.755577	1.3412	0.836608	1.00163	0.712387	1.09367	0.657278	0.593038	0.555404	0.912008	0.484735	0.613922	0.906365	0.704377	1.2795	0.490811	0.917703	0.560462	0.341844	0.711932	0.474769	0.80589	0.458402	0.666436	0.736908	0.359362	0.691616	0.799208	0.592979	0.616205	0.983122	0.606391	1.16725
ENSG00000142507	6.16204	6.52775	6.32722	6.08367	5.46503	6.18011	6.55621	6.28388	6.38622	6.54824	6.0448	7.70689	6.26381	7.51907	6.5111	6.18484	6.22249	5.89409	6.60959	5.9864	6.66274	6.14045	6.84877	6.08087	6.28198	6.50538	6.63088	5.9557	5.62885	6.33577	6.63011	6.22154	6.72831	5.91087	6.42335	6.73492	5.59969	8.03604	6.11991	7.37969	6.61212	6.22104	6.43507	6.48164	5.48031	6.24351	5.9195	5.92431	6.37715
ENSG00000164116	0.948297	1.9144	3.14792	2.98763	1.37933	0.973688	1.82591	0.610855	2.40846	0.531165	3.15545	0.283593	2.05816	0.626308	2.03854	2.83305	1.13319	0.769481	2.0868	1.33384	2.10166	0.54996	1.15929	0.477897	3.38258	2.52481	1.92244	2.10394	3.27416	1.11504	1.53392	2.30116	2.06295	3.13468	0.574765	0.888727	2.25449	0.222039	0.373259	1.25822	2.0534	1.3942	1.50771	2.02777	0.506321	0.427938	1.89075	1.51388	2.61796
ENSG00000138669	0.238423	0.236894	1.03864	1.11754	0.452515	0.451594	0.463434	1.25991	0.295567	0.159449	0.198503	0.151293	0.745207	0.164541	0.1485	0.499115	0.380269	0.182516	0.359052	0.281964	0.501565	0.251962	0.0965044	0.630547	0.150556	0.364307	1.07525	0.114465	0.266205	0.379886	0.160808	0.216056	0.530265	0.535609	0.706598	0.577619	0.255344	0.247952	0.069791	0.0417531	0.627461	0.0854445	1.55116	0.0694534	0.111448	0.297883	0.36001	0.266775	1.51828
ENSG00000174013	4.16488	3.28955	3.96732	3.56216	3.6354	3.67645	2.93011	3.34264	3.56629	4.05179	2.792	1.85459	3.09063	3.9588	4.35569	3.09892	2.93074	3.79702	3.30403	3.73852	3.3522	2.64986	4.32556	4.60963	2.58364	2.5973	3.71037	4.83749	3.86887	4.50798	3.52738	2.49246	3.38379	4.09282	3.46536	3.77227	4.0019	4.58163	3.76706	3.33115	3.54904	3.92097	2.16817	3.52698	3.97013	3.69782	4.03756	3.02896	3.56125
ENSG00000196704	3.70446	3.40745	3.76241	4.23325	4.02589	3.48462	3.86714	3.79689	3.92959	3.91624	3.43139	3.52941	3.89445	4.36539	3.67026	3.74298	3.61617	3.14655	3.78688	3.30476	3.82173	4.28472	4.04699	4.18581	3.8403	3.60476	4.15058	3.19797	4.00104	3.29683	3.90581	3.58458	3.28388	4.12741	3.50804	4.05952	3.72773	3.57824	3.50406	3.60989	3.91666	2.97983	3.84818	3.31827	3.04427	4.28437	4.23526	3.43345	3.43476
ENSG00000178821	0.105914	0.347429	1.1202	2.32071	0.464347	0.0915806	0.179685	0.493542	0.538479	0.219914	0.668028	1.08084	1.60939	0.428891	0.605921	0.817082	0.231716	2.03803	0.800793	0.943885	0.26524	2.03033	0.592166	1.05025	0.34661	0.598262	1.09933	0.140035	0.884967	0.796776	1.6342	1.41197	1.67729	1.40544	0.76955	0.716195	0.315921	1.04048	0.212979	1.34954	0.416684	0.150123	1.71421	1.52702	0.706217	0.758271	0.575153	0.234122	0.243136
ENSG00000106069	0.0754628	0.208946	0.229924	0.318017	0.176033	0.180501	0.16221	0.0916223	0.180307	0.246148	0.155695	0.174874	0.513423	0.0324926	0.205196	0.0501241	0.213144	0.0865757	0.0778997	0.163014	0.319794	0.157465	0.111874	0.160465	0.330972	0.248033	0.0713383	0.177702	0.190666	0.115205	0.509227	0.542014	0.249049	0.180862	0.25742	0.0977338	0.190037	0.0528543	0.399914	0.0846035	0.476432	0.0948242	0.288366	0.194902	0.0599062	0.0886452	0.136723	0.153119	0.0493071
ENSG00000176928	1.3728	1.12095	0.743082	0.678371	0.43158	1.46691	0.494895	0.452869	1.2899	0.650516	0.978931	0.168217	0.47239	0.589519	1.23155	0.350718	1.0628	0.677211	0.954318	0.360689	0.866988	0.34872	0.579779	0.586681	0.966999	0.415775	0.389452	1.01714	0.346174	0.147339	0.416333	0.806623	0.714984	1.13291	0.990326	0.137419	0.774588	0.363431	1.36098	0.397091	1.59538	0.91858	0.495614	0.330484	1.49184	0.358026	0.620331	1.39272	0.419181
ENSG00000129455	7.5967	6.05737	5.89177	3.82688	3.46002	5.1256	5.32216	3.89738	4.43344	1.5515	5.27904	6.7664	4.50137	5.99228	6.14011	2.35934	5.22117	5.27647	4.67177	3.87459	5.71906	0.232032	5.03365	0.0529143	4.04785	4.28436	5.5187	5.59067	4.24137	0.220664	0.208215	1.46737	3.39075	0.419713	5.56127	6.36431	2.44845	6.63809	4.42179	4.01081	1.85949	4.83506	1.77195	4.83411	6.74267	4.75609	4.27398	5.60649	3.17014
ENSG00000161896	0.198525	0.0451931	0.510695	0.0430579	0.0941068	0.0106419	0.0355861	0.500516	0.0809401	0.0221926	3.31828	1.20343	0.669507	0.0981471	0.836887	1.51715	0.01569	0.0386688	0.049532	0.318346	1.91131	0.495707	1.22513	0.0351865	0.568708	2.50984	1.92381	0.172061	1.3637	0	0.0365408	6.33606	0.278591	0.0413929	0.054968	0.793923	1.27501	0.200691	0.890352	0.0432315	1.06545	2.08965	0.567291	1.71586	0	0.154961	0.490716	0.136875	1.55358
ENSG00000143033	2.23681	1.84239	2.32264	2.01118	2.32121	1.7371	2.00413	2.82193	1.7612	2.08831	2.30734	1.14867	1.85327	1.38201	1.71721	2.46036	2.20921	2.32299	1.9909	2.67697	2.25367	2.34176	2.1205	1.71309	2.00261	2.31005	2.04124	2.03039	2.20213	2.50381	2.80793	1.77421	2.30019	2.03721	1.85221	1.99296	2.06526	1.05731	2.48091	1.70122	2.21827	2.76919	2.02449	2.26741	2.32141	2.18969	2.44255	1.71535	2.53192
ENSG00000106410	0.0120046	0	0.0101225	0.0147772	0	0	0	0	0.0160773	0	0	0.108154	0	0.0600904	0	0	0	0.102799	0	0	0.012368	4.08504	0	0	0	0.0166464	0	0	0.0402144	0	0.0655621	0	0	0	0.0375872	1.95196	2.06385	0	0	0	0.0671059	0.00865105	0.0667278	0	0	3.7984	0	0	0.0268602
ENSG00000259956	2.81108	2.76286	4.03666	3.5181	3.11533	3.23797	3.87905	3.68907	3.39718	3.14349	3.21176	1.94612	3.76023	2.12446	3.7066	3.44954	3.76472	3.47707	3.06682	3.54054	2.89071	4.26151	2.95382	3.80642	3.40442	3.39548	3.63023	3.7116	3.61176	4.10612	3.81896	3.26843	3.81201	3.717	3.13169	3.40581	3.65721	1.81237	3.35733	3.1297	3.88495	3.65282	3.26307	3.31587	3.94023	4.02737	3.51692	3.84584	3.23457
ENSG00000150773	0.215696	0.298521	0.456516	0.418922	0.371351	0.204155	0.534713	0.53284	0.237155	0.227652	0.237018	0.177152	0.468524	0.953701	0.275225	1.07052	0.120765	0.20781	0.728921	0.542985	0.548314	1.13648	0.268276	0.373735	0.451479	0.534022	0.294555	0.341505	0.560114	0.302875	0.25709	0.464017	0.367797	0.437384	0.107719	0.446163	0.211297	0.155095	0.547181	0.466423	0.677441	0.234675	0.212746	0.212441	0.262184	0.412011	0.420234	0.240781	0.32459
ENSG00000260729	0.0227061	0	0.0751482	0	0.0831131	0.0607254	0	0.0782589	0.0892607	0.00958731	0.0418826	0	0.0275659	0	0.00570575	0.00344881	0	0.0594436	0.0215133	0.0300377	0.0291797	0.0811566	0	0.0227995	0.00712134	0.0158061	0.0131422	0.0106786	0	0.037629	0.0774702	0.0274602	0.0192147	0.0090027	0.0179619	0.0140142	0.00986682	0	0.0295653	0	0.112838	0.0163799	0.365512	0.0455094	0.00676017	0.0116797	0.00916845	0	0.0128108
ENSG00000205362	0.367919	0.193104	0.188878	1.15522	0.22092	0.378403	0.275899	0.47391	0.585831	0.504488	1.93287	1.50412	0.265272	0.074242	0.114945	2.53196	0.198679	0.102134	0.210649	0.0880069	1.13572	0.230208	0.111884	0.321955	0.742558	2.60219	0.516936	0.14229	0.0659796	0.127202	0	2.16524	1.1555	0.544501	0.335929	0.0718604	0.810662	0	0.562318	0.141018	0.130388	0.779807	0.160344	0.342872	0	0.117773	0.0931708	0.13853	0.302562
ENSG00000203818	0	0	0	0	0	0	0	0	0	0	0	0	0	0	0	0	0	0	0	0	0	0	0	0	0	0	0	0	0	0	0	0	0	0	0	0	0	0	0	0	0	0	0	0	0	0	0	0	0
ENSG00000196296	0.277118	0.0417553	0.615577	0.235191	0.417397	0.235898	0.32154	1.98253	0.586985	0.232468	1.09191	2.29856	0.442232	0.439468	1.67602	0.104759	0.0939294	0.303317	0.285072	0.379541	1.36414	0.633931	0.577577	0.184856	2.6034	3.54831	2.5063	0.0535051	0.0952215	0.612747	0.559188	6.66317	0.565052	0.178005	0.252344	2.72929	1.07669	0.304104	1.11426	0.324978	0.601385	0.776674	0.801341	2.76427	0.099846	0.198207	1.54348	0.0435034	1.59454
ENSG00000109805	2.65893	2.69069	3.11347	2.53264	2.36654	2.30328	3.64012	2.55226	1.90744	3.42811	1.38312	1.47594	2.472	2.24792	2.21694	3.28632	2.96764	3.01637	2.24865	3.28447	2.50819	3.04348	2.88102	2.06178	3.33692	3.03163	2.399	2.08934	2.53449	3.55936	3.22353	1.82461	2.42029	2.64182	3.06744	2.5247	2.11554	1.52992	1.94165	2.17055	3.02051	2.89228	2.85614	3.27874	1.5828	2.70486	3.79025	3.0143	2.07545
ENSG00000203780	1.29317	0.841308	0.535284	0.750288	1.05889	0.879454	0.672229	1.6296	1.3448	0.756556	1.1495	1.59349	0.671017	0.802082	0.32306	0.740979	0.514587	0.871164	0.603553	0.630182	1.29736	1.96975	0.900398	0.569337	0.821726	1.13025	0.242863	1.11872	0.774819	1.31041	0.174214	0.524871	0.562258	0.855272	1.09324	0.443162	0.489129	0.420954	1.15772	1.40883	0.82942	0.472406	0.911431	0.412928	0.915593	0.855203	0.924638	0.377152	0.409873
ENSG00000111641	3.93411	3.71386	4.12961	4.20425	4.4974	3.91047	4.8411	3.98548	4.20375	4.97564	3.67239	3.56508	3.99966	4.22811	4.28771	3.00683	3.96678	5.00331	3.57001	3.67014	3.23341	4.24953	3.75862	4.78238	3.79774	4.05183	4.13309	3.67941	4.1864	3.99275	3.82677	3.15663	4.32845	4.80164	4.33149	3.83883	4.36123	3.24365	3.47268	3.89336	4.66987	5.33819	5.07702	4.16987	3.25241	4.49804	4.00472	3.75643	4.02708
ENSG00000221923	0.177088	0.504401	0.474161	0.927737	0.262959	0.937892	0.250353	0.501024	0.650075	0.0983881	0.992649	0.270728	1.42776	0.229127	0.25228	0.449895	0.349156	0.66111	0.514489	2.71222	0.884297	1.06276	0.251365	0.171792	1.37553	0.765235	0.505638	0.591481	1.80014	0.221269	0.782569	1.3643	0.786912	1.41351	0.564497	0.271004	0.557943	0.162909	0.239029	0.286032	0.775934	2.40163	0.377939	0.639546	0.122188	1.62486	0.33621	0.527847	0.311823
ENSG00000163975	1.46729	0.892156	3.56045	3.57897	1.61853	2.30179	1.55874	2.97839	1.79251	1.82307	2.9781	2.81785	3.67214	3.5641	0.604476	2.71792	2.28001	1.23714	1.64148	2.15908	1.08128	2.10289	1.71066	5.20519	1.17534	1.29762	3.90065	0.701273	1.16791	2.90074	2.24149	1.58234	3.64279	2.33023	0.794528	2.37055	1.91318	0.928487	1.4764	1.63669	3.48529	1.36815	2.48787	3.05692	0.335605	1.03603	1.62908	1.32623	4.72884
ENSG00000127329	0.67915	0.700194	1.49537	1.43009	0.559024	1.38438	0.354632	0.687335	1.0375	0.247944	0.906588	0.218998	1.40563	0.111632	1.60209	0.838577	0.287695	0.681799	0.673883	1.10912	1.01007	0.541038	0.311576	1.21336	1.79647	1.36489	0.838826	1.28591	0.842867	0.663761	0.659101	2.08264	1.31972	0.845135	0.425362	0.341619	1.07477	0.221237	0.499284	0.353263	1.61011	0.872744	0.895704	1.20125	0.477922	0.491456	0.82446	0.954302	0.492051
ENSG00000077044	1.49462	0.717966	2.40828	1.69888	1.1741	1.32131	1.66493	2.42899	1.72766	1.43763	2.18135	0.964255	1.7704	1.23601	1.3952	2.06644	0.777147	1.49902	1.58453	1.71629	1.40698	0.891281	1.04922	1.26694	2.07979	2.67415	2.26658	1.24906	1.23345	2.84812	2.34122	4.29737	2.38139	1.32629	1.23706	1.60021	1.70601	0.75675	1.00338	1.33085	1.85117	2.06151	2.53002	2.32927	0.792171	1.0969	1.96859	1.24902	2.64719
ENSG00000143183	3.84032	4.14945	4.09715	4.30974	4.68002	3.46353	3.98769	4.60439	3.84367	3.89322	4.01899	3.02657	3.9174	3.64195	3.50409	4.12494	4.3302	4.12695	4.20272	3.95682	4.41278	4.05076	4.03019	4.96368	3.87718	3.881	4.07457	3.85481	4.1671	4.33026	3.99951	3.46858	3.81672	4.24196	3.74248	4.01897	3.81654	3.41056	3.97657	3.65831	4.11884	3.89087	6.76801	4.16991	4.06672	4.21616	3.92766	3.61809	3.60586
ENSG00000108774	5.53991	5.13992	5.46892	5.41596	5.50717	5.07362	4.83917	5.30946	5.19907	4.99459	5.35257	3.90308	5.20261	4.84829	5.22855	5.57528	5.20986	5.21619	5.05734	5.31334	5.63031	4.91666	5.41834	4.9319	5.5215	5.30852	5.4054	5.04	5.21126	5.02309	5.23905	4.7138	5.4278	5.09304	4.95322	4.86015	5.45901	4.47274	5.13714	4.22247	5.35262	5.40912	5.10703	5.15276	4.86607	5.04891	5.92507	5.13451	5.24227
ENSG00000125522	0	0	0.015514	0	0	0	0	0	0	0	0.0195082	0.123868	0	0	0	0	0	0.154978	0	0	0	0	0	0	0	0	0.0211995	0	0	0	0	0	0	0	0	0	0	0	0	0	0	0	0	0.0296099	0	0	0	0	0
ENSG00000183696	5.18728	4.11276	2.92076	2.54889	4.33306	4.3515	4.98915	1.99649	3.14699	5.10091	5.50002	6.19863	2.92247	8.0713	5.31118	3.27774	4.11569	5.70132	4.3619	3.92685	4.09335	4.20624	4.82704	2.86379	3.59113	3.14798	3.02124	5.33516	3.81531	4.13093	2.50627	3.52524	4.02328	3.07139	5.63476	4.04308	3.32776	7.0613	6.10267	4.43721	2.51078	4.13301	3.28004	4.25828	5.45795	4.49993	5.31989	4.92182	3.64073
ENSG00000269113	0.132481	0.342665	0.137172	0.620894	0.157747	0.134905	0.0250762	0.115288	0.273057	0.136857	0.967244	0.0568721	0.186439	0.0313485	0.323482	0.101552	0.012603	0.0341834	0.67618	0.0838011	0.70503	0.0581413	0.0408953	0.139507	0.711012	0.39894	0.285798	0.22766	0.22262	0.256347	0.0534377	0.9664	0.575139	0.149247	0.016761	0.0516078	0.31163	0.0929254	0.422121	0.110131	0.347798	0.267998	0.173858	0.500301	0.0898425	0.12563	0.0394906	0.257788	0.201323
ENSG00000166126	0.473316	0.441032	1.94384	0.546006	0.218802	1.61548	0.259658	2.68715	0.907881	0.334	0.27497	0.654399	2.35305	2.76979	0.939426	0.130453	0.293752	1.98437	2.49369	1.61083	0.239782	2.31975	0.227117	2.04369	0.206312	0.0800327	0.316769	0.209401	1.10956	0.868005	1.85503	0.0721175	1.17374	0.122207	1.14336	1.21047	0.576302	1.25399	0.935266	1.26558	2.79936	0.782614	1.93503	0.544588	0.417983	2.00821	0.178932	0.360772	1.61226
ENSG00000276289	0.0204293	0	0.0115122	0	0	0	0	0.0064123	0	0	0.00725883	0.0158864	0.142814	0.0087009	0.0538075	0.00413306	0	0	0	0	0.00704942	0.0283117	0	0.00687024	0	0.0189261	0.0993633	0.00427626	0.0153848	0	0.0469288	0.0110348	0.0286957	0.0107847	0	0	0	0.157591	0	0.00846004	0.03093	0	0.0256733	0.0219998	0.00809955	0.0278438	0.0327018	0	0.23439
ENSG00000129451	9.71892	7.22142	6.55026	4.47077	2.66974	6.75051	6.60085	5.43816	3.90185	2.27991	6.81447	7.60721	5.35193	7.21095	8.09265	2.59781	6.28016	8.41588	5.65901	6.85738	6.33178	2.26041	7.48153	1.55329	4.22024	4.80929	6.88176	7.78696	5.51637	2.2494	0.358189	3.08633	6.39052	5.89614	7.43837	8.16968	6.80861	7.70792	6.1248	3.52974	4.73794	8.48149	4.31469	5.36766	8.52682	7.52425	6.60834	6.81571	4.52499
ENSG00000117139	3.83805	3.74691	3.76306	2.52741	3.70673	4.41924	2.80166	3.83047	3.71716	3.31928	3.64174	2.44022	3.46325	2.74868	3.50035	3.91496	3.67175	4.29062	4.52858	4.35363	3.4895	2.91564	3.62296	4.05052	3.19484	3.27338	3.39304	4.16226	4.3686	4.50504	3.2368	2.17876	3.62417	3.55359	3.86159	3.32069	4.23085	2.05254	4.29173	2.74162	4.09332	4.18896	3.11232	2.9665	4.38331	4.50982	3.9357	4.24617	3.82428
ENSG00000244025	0	0	0.0674276	0	0	0	0	0	0	0	0.0428185	0.261085	0	0	0	0	0	0.0706468	0	0	0	0	0	0	0	0	0.0464985	0	0	0	0	0.0327038	0.0342095	0	0	0	0	0	0	0	0	0	0	0	0	0	0	0	0
ENSG00000001460	1.39198	1.18693	2.28374	1.34449	1.61841	1.0361	1.90654	2.15168	1.38857	1.9969	1.27293	1.03835	1.38188	1.11576	1.25759	1.63725	1.4137	1.99785	1.98727	1.52209	1.18836	2.02257	1.05878	1.8245	1.40069	1.08665	1.63876	1.0901	2.01703	1.22089	1.48996	0.722596	2.238	1.55575	1.91154	2.03658	1.8335	0.590589	1.69355	1.17198	1.25501	1.50945	1.18279	1.38629	1.40655	1.71226	1.57639	1.29294	1.10778
ENSG00000135723	4.07122	2.97741	2.00319	2.37795	3.42426	2.11336	3.36407	2.66769	3.19702	2.50016	3.71989	3.35346	2.37249	2.75796	2.66463	3.88117	2.78444	2.88032	3.07896	2.28844	2.94558	2.548	2.81316	1.63992	3.1567	4.0496	2.64695	2.87942	2.09679	2.39733	2.78091	3.7304	2.57845	2.56609	3.5254	2.07242	2.38228	1.87581	3.75576	3.64276	2.47679	3.42961	1.96869	4.14447	2.65802	1.69994	3.34401	2.85459	2.48444
ENSG00000080031	2.69836	0.623792	2.34147	0.167364	0.354622	0.947303	1.52703	3.83516	1.85552	0.797839	1.27467	0.779195	2.15309	0.372642	1.06852	0.697561	0.629454	2.57933	2.32772	2.93922	1.33008	1.61162	2.70334	0.547074	0.602344	0.81543	0.383024	0.598051	3.0036	0.452151	0.574164	0.223659	1.2181	0.138614	0.955897	0.704015	2.65455	0.832718	0.804335	0.374533	0.785414	1.76921	2.27002	1.61598	1.73822	3.06741	1.46409	1.33673	1.82988
ENSG00000168300	2.47382	2.03073	3.61257	3.42369	2.87118	3.12015	1.98787	2.86075	2.58582	2.84735	3.36243	1.42669	3.15824	1.39546	2.52427	2.52008	2.43164	2.94993	2.85978	2.17415	3.37741	2.15585	2.94434	1.89757	2.74064	3.13921	2.74555	2.72637	3.13832	2.43465	2.64515	3.33737	2.89194	3.12632	1.64738	2.35261	1.86628	1.77484	3.53029	2.27997	2.68152	2.77107	2.71819	2.2084	2.47403	2.40645	2.63972	2.09146	2.63342
ENSG00000196772	0	0	0	0	0	0	0	0	0	0	0	0.176748	0	0	0	0	0	0	0	0	0	0	0	0	0	0	0	0	0	0	0	0	0	0	0	0	0	0	0	0	0	0	0.0251875	0	0	0	0	0	0
ENSG00000145451	0	0.0223207	0.0454127	0.0159729	0.033397	0.0371983	0.00792223	0.345896	0.037958	0	0	0.0240877	0.00948012	0.0132097	0	0	0.00924605	0.0183183	0.0604439	0.0428264	0.0292513	0	0	0.0514304	0.00972621	0.00361647	0.00899577	0.00325234	0	0.0595559	0.010839	0.00210391	0.00878734	0.0445706	0	0	0	0	0	0.00964414	0.00593019	0.00374834	0.173735	0.00840265	0.00923335	0.00533385	0.0615355	0.0126079	0
ENSG00000106125	0.206264	0.205407	0.318546	0.359081	0.39859	0.19207	0.265124	0.275598	0.318874	0.141906	0.224167	1.23901	0.341896	0.886373	0.127167	0.23855	0.224357	0.473777	0.176177	0.293717	0.202962	0.568543	0.257344	0.323868	0.220605	0.144167	0.106197	0.151523	0.233864	0.377804	0.594384	0.195509	0.191432	0.153115	0.0989074	0.274435	0.2136	0.594868	0.145567	0.449615	0.410084	0.268126	0.187043	0.219498	0.220607	0.183587	0.165608	0.159326	0.100027
ENSG00000076984	2.42659	2.84721	3.44714	2.79158	3.21748	3.08822	3.38845	3.48968	3.61418	3.38923	2.96096	3.49663	3.22144	3.34053	3.28776	2.92767	3.15655	3.76232	3.74951	3.42838	2.66279	3.41552	2.67178	2.85655	3.01812	3.24494	2.56672	2.82765	2.34249	4.37589	3.74216	3.46381	3.43027	2.7337	2.9063	3.73767	3.03552	2.9093	3.03051	3.27939	3.92394	3.04506	3.21664	3.30001	2.94115	3.46118	3.11229	2.95311	3.55254
ENSG00000271824	0	0	0.0374604	0.0721549	0.0148884	0.0179695	0	0.121357	0.0973122	0	0.031512	0	0.0181417	0	0	0.00903175	0	0	0.186463	0.0113327	0	0	0.0711454	0.129665	0.0551283	0	0	0.0278528	0	0.0165765	0.0812027	0.012073	0.0126331	0.0466299	0.0235194	0.140712	0.0881729	0	0	0	0	0.042589	0.109165	0.0710119	0	0	0	0	0.0497769
ENSG00000125843	1.53553	1.57492	2.37965	1.73807	2.13498	1.79963	2.22878	2.03976	1.80567	2.02424	1.38179	1.69805	2.48822	1.38532	2.64469	1.72316	1.85571	1.70829	1.91951	2.32163	2.29191	1.89533	1.34892	2.03442	3.01377	3.09634	2.45808	2.03411	1.61659	1.7156	2.11927	2.23264	2.05633	1.98092	1.58557	1.91997	1.66228	1.49128	1.8558	2.28507	1.76935	1.72218	1.14098	1.92539	1.49499	1.58552	2.38851	2.28997	2.53169
ENSG00000155974	0.6985	0.819661	1.93143	0.574597	1.15412	0.677598	1.31873	0.467054	0.975707	0.855467	0.570292	0.333111	1.28612	0.0442516	1.20443	0.436051	1.41378	0.307998	1.01436	1.12639	1.2193	0.416278	0.829345	0.933136	1.02023	1.28193	1.27214	1.13909	1.38071	1.90518	1.15431	0.661792	1.3119	1.03081	1.09653	0.631266	1.05175	0.183634	0.730172	0.216003	1.27846	1.98977	1.17363	1.04218	0.917627	0.188229	1.64783	1.20927	2.4909
ENSG00000105053	2.3357	1.70675	2.12691	1.68365	1.85513	1.57082	1.97182	2.19456	1.71259	1.78791	1.81851	2.19406	1.55486	1.54477	1.71792	1.71488	2.0586	1.84789	1.65534	1.89539	1.9659	2.06664	1.93155	1.90031	2.01444	2.19253	1.81686	1.61145	1.92884	1.98537	2.28238	1.82073	1.8805	1.7226	1.52304	2.05579	2.11616	1.86181	2.10136	1.5861	1.83959	2.34917	2.16064	1.58105	1.4051	1.33801	1.37207	1.87545	1.72678
ENSG00000260286	0	0	0	0	0	0	0	0.0282843	0.0403123	0.0253991	0	0	0	0	0.0301413	0	0	0	0	0	0	0.0621787	0.0293158	0	0	0	0	0.0189099	0	0	0	0	0	0	0	0	0	0	0.0924563	0	0.0343271	0.0217758	0.0284987	0	0	0	0	0	0
ENSG00000117394	6.52493	7.84845	7.82162	6.146	7.22413	8.4589	6.51304	6.35784	7.73166	8.9384	7.90834	4.76337	7.97099	7.2261	7.03389	7.55619	6.70784	8.32195	9.38708	8.47865	7.57343	6.25892	8.11211	10.3236	6.66667	5.81506	6.90543	7.14422	7.6963	7.93151	6.82161	3.82418	6.92136	7.28061	8.44441	8.04253	8.82796	6.5642	7.68477	7.9555	6.72835	9.15114	7.58968	7.3193	8.62775	8.74266	7.14815	8.45174	8.9623
ENSG00000125084	0.0546865	0	0.0155713	0.0227121	0.036574	0.0656174	0	0.210233	0.0728787	0.0155339	0.0195801	0.0426374	0.108762	0	0	0	0.0646313	0.0163288	0.0518436	0.134348	0.0190176	0	0.0179388	0	0.153777	0.0754067	0.0832901	0.0115551	0	0.0802571	0.193215	0.0443237	0.105934	0.029031	0	0	0.0159859	0	0	0	0.160159	0	0.0516911	0	0.0218371	0.0375865	0.0295618	0.0149622	0
ENSG00000030304	0	0	0.0495646	0.0219521	0.00595314	0.176189	0.00606524	0.108004	0.0473675	0.0100259	0.472289	0.09441	0.138661	0.0742074	0.200641	0.0977346	0.0211352	0.0671723	0.0169028	0.0314019	0.258944	0.024734	0.133196	0.0930747	0.233849	0.758149	0.193543	0	0	0.00663047	0.150076	1.64173	0.0594518	0.0646479	0.0187812	0.0926957	0.166099	0	0.119848	0.0293141	0.124084	0.376919	0.299922	0.600451	0.0211062	0	0.0931277	0.028777	0.128674
ENSG00000172288	0	0	0	0	0	0	0	0	0	0	0	0	0	0	0	0	0	0	0	0	0	0	0	0	0	0	0	0	0	0	0	0	0	0	0	0	0	0	0	0	0	0	0	0	0	0	0	0	0
ENSG00000164266	0	0.50041	0.385343	0.0611877	0.0333249	0.0598412	0.115474	0.651785	0.557357	0.0281523	0.73043	0.184595	0.0204177	0.30875	0.0334027	0.0101689	0.196545	0.0441547	0.378186	0.0990404	0.225368	0	0.19917	0.190589	0.0820178	0.176616	1.62409	0	0.127654	0.0370768	0.197531	0.261557	0.801549	1.34227	0.0524513	0.428871	0.694741	0.827568	0.0348863	0.195354	0.401169	0.0121202	0.122389	0.179637	0.0588606	0.612129	0.104829	0.227478	0.092073
ENSG00000187135	0	0	0	0	0	0	0	0	0	0	0	0	0.0600882	0	0	0	0	0	0.0158409	0	0	0	0	0	0	0	0.0192748	0	0	0	0.133954	0	0	0.026305	0	0	0	0	0	0	0.355013	0	0	0	0	0	0	0	0
ENSG00000214929	0.00484366	0	0	0	0	0	0.00491952	0	0	0	0	0.0554257	0	0	0	0	0	0.00428208	0	0	0	0.0100781	0	0.0048637	0	0.00672298	0.00558696	0	0	0	0	0.00781525	0	0	0	0	0	0	0	0	0	0	0	0	0	0	0	0	0.00544571
ENSG00000168237	0.602311	0.661001	0.644095	0.904986	1.03582	0.806455	1.85353	0.80726	1.42397	0.477173	0.767671	1.13321	1.02089	1.02879	0.971378	0.624825	1.48145	0.907088	0.730967	0.996247	1.4023	1.22161	1.25194	0.359826	1.11831	1.24327	0.807841	1.12854	0.809889	0.857584	1.33892	1.47546	0.973406	0.925726	0.485546	1.07887	0.494121	0.797234	1.26343	1.22154	0.85362	0.562246	1.14552	1.43939	1.37222	1.36146	1.16362	1.39061	0.845044
ENSG00000009724	0.171843	0.0351243	0.105205	0.0287267	0.319776	0.135269	0.109356	0.363766	0.259441	0.114135	0.230439	0.216083	0.143012	0.0587191	0.0856438	0.0625744	0.0615056	0.105332	0.192812	0.395541	0.127634	0.247473	0.0394924	0.0579349	0.0924642	0.117711	0.0467784	0.133337	0.120918	0.178134	0.321644	0.0696069	0.11932	0.0900516	0.098821	0.0357775	0.0451287	0	0.268452	0.0641043	0.240456	0.0863506	0.101929	0.0375647	0.0813291	0.0591047	0.186191	0.0652228	0.0773312
ENSG00000177519	0.19094	0.543842	1.77594	0.75095	2.16716	0.407818	0	3.04998	0.269749	0.0561003	0.0704584	0.220082	1.636	0.292885	0.220286	0.0304776	0.0299513	0.183327	2.04121	0.807935	0.165439	0.135301	0.0803655	0.374097	0.141429	0.278482	0.131244	0	1.54998	0.464443	0.0234734	0.105927	0.73793	0.176696	0.0266244	1.39253	0.908776	0.57832	0.0693608	0	2.17236	0.403321	1.7487	0.319342	0.0397444	0.340133	0.130647	0.118912	3.09514
ENSG00000105048	5.57283	3.86191	3.17187	1.34804	1.50181	3.21507	6.03827	3.16693	5.54114	4.30449	4.44548	6.89041	2.07926	4.49798	4.47231	3.72139	3.6139	3.05353	3.44297	1.21417	4.27803	4.04198	5.23276	1.15025	5.10969	6.82521	7.1182	4.25448	3.38562	4.48332	3.14335	9.39202	4.56132	3.19928	2.9569	5.50013	4.14078	7.10014	5.30599	4.36127	0.870769	4.70144	3.45202	5.08994	3.84603	0.926559	4.21001	1.74884	5.30053
ENSG00000198888	11.0216	9.2514	10.3743	12.0629	11.7533	10.2593	10.0237	12.1942	11.2404	10.0581	11.315	8.25903	11.5012	8.31392	10.3629	9.70834	10.9509	10.2782	9.80832	10.3226	8.79869	11.7454	9.73897	11.3314	10.7735	9.97511	10.8139	9.77486	9.36032	9.82545	10.9943	12.0759	11.159	10.4593	10.1659	10.4718	10.9873	6.21776	11.1524	8.34947	11.3415	10.5533	10.4174	10.9233	10.7348	10.5494	10.5676	9.91736	10.1319
ENSG00000143224	1.1554	1.02136	1.62357	1.62219	1.47659	0.975245	1.42162	2.25983	1.78412	0.963141	1.46357	2.08871	1.95949	1.78992	0.964858	1.50966	1.28694	1.29925	1.50228	1.12712	1.43051	3.23113	1.13744	1.42762	1.26869	1.1865	1.58206	1.01801	1.24315	1.95956	1.86384	1.1141	1.43434	1.29285	1.13448	1.15871	0.910422	1.64059	1.98134	2.09899	1.72059	1.03673	3.02359	1.27737	1.32095	1.99519	1.30147	1.17753	1.20156
ENSG00000206047	0	0	0	0	0	0	0	0	0	0	0	0	0	0	0	0	0	0	0	0	0	0	0	0	0	0	0	0	0	0	0	0	0	0	0	0	0	0	0	0	0	0	0	0	0	0	0	0	0
ENSG00000049239	2.83919	2.31815	4.37459	3.54297	2.9205	3.98662	2.78724	4.65484	3.41705	2.64209	3.80871	1.87413	4.47255	1.66737	2.94869	3.25097	2.59029	2.71366	3.27873	4.10467	2.87832	2.4202	3.08102	4.63292	4.12685	3.56723	3.56152	2.95864	3.80848	2.33888	3.96184	3.97697	3.78187	3.654	2.57576	2.81218	4.01793	1.90644	2.80666	2.7087	4.08819	3.50284	3.25958	3.9803	2.76715	2.32891	3.10315	3.46756	3.03657
ENSG00000089902	4.63837	3.77896	4.88398	2.79017	3.99626	4.7225	3.76843	3.71646	2.97535	4.04881	3.83389	1.68187	3.71617	3.15573	4.25076	3.45936	3.43718	4.98851	4.78812	4.69381	3.26385	2.98023	4.22213	3.15795	3.22623	3.27359	3.59046	4.47992	4.41418	3.98899	3.96433	2.57426	3.48031	3.55294	4.6943	3.88846	3.39938	2.73043	4.65359	2.8145	4.2995	4.63358	4.2359	3.8694	5.00139	4.60003	3.51831	4.06352	4.26927
ENSG00000178075	0.896331	0.394096	1.02862	0.495991	0.401503	1.41311	0.516677	1.56943	0.402223	0.29592	0.36443	0.107768	0.931353	0.243203	0.914615	0.852145	0.620188	1.40288	0.852181	1.51554	1.35872	1.88483	0.764528	0.661566	0.526485	0.417999	0.713968	1.01454	1.19009	0.763577	1.10349	0.387754	1.09687	0.751269	0.745651	0.671603	0.111926	0.334018	0.864373	0.23361	1.41534	0.761361	0.662409	0.289769	0.747006	0.997454	1.37783	0.508241	0.456237
ENSG00000108443	2.86037	2.46542	2.97746	2.44223	2.53842	2.2114	2.7348	2.89056	2.37618	2.62376	2.4396	1.50035	2.31588	1.55498	2.37309	2.15015	2.52431	2.56283	2.4325	2.98789	2.33176	2.81839	2.48142	2.22787	2.27098	2.33789	2.22132	2.81403	2.78627	2.27256	2.7993	2.61374	2.33877	2.66754	2.48306	2.50222	2.91021	1.11492	2.57585	1.5858	2.65012	2.43129	2.76099	2.47479	2.53269	2.98371	3.11644	3.03068	2.4364
ENSG00000106571	1.79606	2.12317	1.23917	1.38794	3.31256	2.6898	2.34184	1.57837	2.1123	2.57431	2.34427	1.08968	1.60247	1.1054	2.99383	2.16633	2.17002	2.23033	2.77426	3.10215	1.91099	1.70059	2.09818	0.562651	2.60382	2.7726	0.946456	2.4609	2.26186	3.46464	1.9573	2.01005	1.33265	1.88628	1.79507	1.259	2.05813	0.747379	2.23786	1.91145	2.11346	3.75238	1.6588	1.79116	2.21344	0.929301	2.27747	2.75452	2.03245
ENSG00000152049	0.749668	0.670434	1.41653	2.37651	0.942967	1.74448	1.3192	0.268982	1.71823	0.694904	2.83528	0.435838	0.902702	0.14672	1.17152	1.68986	0.386023	0.325169	1.19075	0.750329	2.14391	0.57627	0.339861	0.525326	1.79357	1.99256	1.91496	1.21811	0.948336	0.335243	1.00879	2.52667	1.44773	1.83298	0.463302	0.337997	2.02688	0.0323763	0.448404	0.789557	0.707312	1.22354	1.40287	1.26735	0.285919	0.361213	0.889073	0.487276	0.953484
ENSG00000123364	2.76984	1.89925	1.67622	1.04161	3.57521	3.6191	1.95044	1.26025	3.51075	1.88131	2.96324	3.48822	1.97277	3.18279	2.90049	2.52963	2.74809	2.28094	2.23742	2.20245	3.32505	0.701998	3.828	2.11861	2.47165	3.33884	2.78953	2.87121	0.847365	2.92127	0.6394	0.891938	2.10154	2.34784	1.64947	2.90899	1.30335	3.43964	1.47849	2.23607	1.74054	2.21514	1.53245	1.34418	1.98824	0.233993	3.43982	2.51099	1.29226
ENSG00000196227	1.07139	1.61399	3.13143	2.0142	1.6571	1.67364	1.93233	3.19862	1.46078	1.14458	1.52139	1.31921	2.38309	0.821437	3.01884	3.08127	1.90606	3.12661	1.50403	2.35599	1.81491	3.03449	1.73976	2.11476	1.97066	2.14756	2.06767	2.58394	3.43057	1.93465	3.22706	1.90998	2.53762	2.63353	1.60327	1.56027	2.51101	1.09957	1.752	1.44869	2.96966	2.85495	1.54296	1.76847	1.81724	4.27464	2.09565	2.01119	2.84956
ENSG00000072694	0.205528	0.308266	0.547038	1.20676	0.293008	0.782003	0.113139	0.371838	1.16921	0.0567073	1.52086	0.570694	0.855086	0.687106	0.359981	0.231679	0.940961	0.273267	0.516278	0.469103	1.1032	0.170651	0.617359	0.115263	1.76111	0.420242	0.664456	0.408795	0.449022	0.437238	1.38767	1.15467	1.07691	1.53491	0.162127	0.282412	1.0133	0.402335	0.567766	0.410518	0.88272	0.624809	0.384858	0.652583	1.07234	0.382427	0.354354	1.13806	0.154326
ENSG00000188186	4.31444	4.32096	4.91739	6.93891	4.2879	4.74551	5.02384	6.34368	4.84531	3.8704	4.41778	8.42114	5.37732	7.19562	4.2111	4.46877	4.59071	4.05599	4.53491	3.71529	5.15578	6.49355	4.93002	5.11099	4.52087	4.57278	6.55422	3.22376	4.10654	4.86296	5.10601	4.76981	5.06981	5.59879	3.70057	5.12363	4.27251	7.4247	4.45964	6.01855	3.91077	3.76096	6.10595	4.33123	4.21015	4.89617	4.24719	3.8049	5.58899
ENSG00000175309	1.38766	1.11198	1.65867	1.70214	1.5852	1.96787	1.56999	1.46594	2.17166	0.990967	1.66591	1.18849	1.63992	0.688972	1.15273	0.993169	1.23587	1.07815	1.61025	1.29396	1.80719	2.29627	1.76172	1.81595	1.25921	1.62376	1.93996	1.31335	0.978787	1.5018	2.11483	2.31417	1.64323	1.79363	1.18383	1.23838	1.00538	1.10445	1.69878	0.989822	1.74743	0.957672	1.74711	1.40509	1.43653	1.6019	1.81655	1.37077	1.41394
ENSG00000150477	0.391536	0.245641	0.859551	0.498745	0.178998	0.364335	0.781458	0.318324	0.469578	0.241425	0.361227	0.231793	0.706025	0.391168	0.356589	0.533901	0.51307	0.416664	0.453238	0.71089	0.433153	0.794437	0.349537	0.431982	0.632721	0.445295	0.519515	0.57687	0.373323	0.578622	0.82362	0.494844	0.274415	0.460987	0.268287	0.32125	0.272287	0.124889	0.636983	0.545013	0.824623	0.243706	0.901873	0.324184	0.28872	0.193823	0.588546	0.594409	0.324747
ENSG00000011052	0.560954	1.05196	0.613564	0.799564	1.05167	1.0073	1.38872	0.464505	2.0529	1.62282	1.11882	0.257424	0.964874	2.21609	0.931953	1.38472	1.03164	1.54349	1.42289	1.41313	1.02644	0.906184	1.17823	0.730903	0.504447	0.748016	2.10094	1.22908	0.51154	1.11386	0.965502	0.66629	1.72925	1.2027	1.38499	1.5661	1.10361	1.1419	0.689735	1.09852	0.433447	0.883735	0.787356	1.29031	0.883045	0.705136	1.00803	0.776417	1.33611
ENSG00000181649	5.72602	5.50556	3.8896	3.30851	5.36259	4.40998	6.20444	4.71004	4.45934	5.3013	4.51328	5.34789	3.63969	5.12548	4.46177	4.5596	6.50352	5.3719	4.30885	4.73657	4.82497	3.62743	6.04817	4.28364	4.71536	3.3445	4.8662	5.2323	3.70526	6.2267	3.40273	3.57808	4.61495	2.18748	5.58478	5.47502	4.7076	4.15445	5.0342	4.97497	4.3619	4.32924	4.73277	5.14709	5.29771	5.54131	5.68448	4.89465	4.59105
ENSG00000110395	1.40718	1.8366	2.5881	2.11047	1.95523	2.12386	2.43656	1.9474	1.8223	2.32706	1.92898	0.203558	2.40696	1.04458	2.49796	4.12911	1.98868	2.04403	2.3455	2.77831	1.38342	1.07948	1.97388	1.57659	2.6281	2.36817	2.18882	2.93178	2.50368	1.96663	2.5034	2.08669	2.82752	2.58457	1.91447	1.78598	2.28923	0.423125	2.05479	0.820149	2.93687	2.75027	2.19313	2.68119	2.37207	2.72261	2.63513	3.02926	3.28671
ENSG00000107018	0.0225324	0.0386646	0.293361	0	0.108971	0.0270965	0	0.0419443	0.225135	0.0924256	0.0933024	0.10209	0.0805572	0	0	0.0799732	0.189046	0.019934	0.0631208	0.0507292	0.0685442	0	0.126658	0.306952	0.0555863	0	0.0765362	0.0692166	0.0748479	0.0975093	0.0618349	0.0539956	0.0929128	0.200472	0.0700123	0.0814972	0	0	0	0	0.0256513	0.0323275	0.103418	0	0	0	0.105562	0.0363069	0.0501912
ENSG00000128973	3.81058	3.37429	4.10767	4.73678	3.87158	3.59538	3.48543	4.17217	3.63716	3.71344	2.55027	4.03193	3.86843	3.86681	3.44726	2.7343	3.66266	3.93493	2.44992	3.2959	3.26311	5.41946	4.32965	4.13564	3.11841	3.31343	4.42636	3.17305	4.25636	3.8917	4.66632	3.03766	4.17743	3.70208	3.44057	3.14846	2.68515	4.33556	3.15116	5.10061	4.43277	3.23067	5.13736	4.09013	3.17439	3.11962	4.22458	3.77327	3.09493
ENSG00000100842	3.87007	3.64159	5.64917	3.53657	3.67814	3.41707	1.40555	4.11437	4.69063	2.70948	3.41577	2.93362	5.96213	5.46796	4.68736	3.09237	3.49036	4.34587	4.515	4.92655	3.44338	4.94652	3.27179	3.96484	2.80965	3.1314	5.24548	3.58165	4.2726	4.1548	4.42071	1.95205	4.56051	4.0899	3.88556	4.52938	3.6453	2.60275	3.76265	3.18508	4.96347	2.84927	4.43864	3.24077	4.1003	3.99141	3.05552	3.4172	3.35077
ENSG00000116285	4.65015	4.34975	3.70295	3.14781	4.02397	3.02457	5.83894	3.74528	3.98337	3.90557	5.64197	2.05191	3.47299	2.55396	3.41194	4.72555	3.59979	4.51401	4.7026	3.72429	3.83283	3.29434	4.31694	1.83823	3.99765	4.16544	3.45844	3.9989	4.93491	4.92	2.65873	3.86859	3.39021	3.20198	4.62572	3.51271	3.87667	3.40339	4.22172	2.63789	2.69771	4.83613	3.61464	5.62316	4.15413	3.54029	4.27894	4.02832	3.60911
ENSG00000167880	5.91439	4.99448	4.66607	3.29233	4.87887	5.44049	3.69442	4.99926	4.0005	5.28578	4.00743	3.82806	5.52006	5.31014	5.35666	2.30961	5.18646	5.70904	4.93254	5.36133	3.21042	5.4815	5.3314	3.96693	3.54108	3.36639	4.69657	5.38427	5.80517	4.00678	4.37596	1.80563	5.2638	4.02886	6.25481	6.01302	4.26469	4.32593	6.09885	4.05086	4.90489	4.96858	3.99119	4.84219	7.03397	6.45519	5.55431	6.01247	3.19756
ENSG00000139656	0.0300556	0.0259691	0	0	0.0299628	0.0361246	0.146536	0.10957	0.0401675	0	0.0318714	0	0.106751	0.181347	0.059453	0.122916	0	0	0.0284805	0.0228354	0	0.0619571	0.0578406	0	0.144135	0.0415772	0	0	0	0.0333405	0	0.0482384	0.0254439	0.0928247	0.0471908	0.0369007	0	0	0.0620691	0.273047	0.0676151	0.0216971	0.028396	0	0.0702017	0	0.139503	0.0483528	0
ENSG00000104998	3.26083	2.48494	2.39744	3.63155	3.45029	2.25299	3.33469	1.33662	4.623	3.18638	3.78929	4.40146	2.78295	3.79468	2.25886	0.929633	3.25913	3.13422	3.70868	2.03333	3.31279	2.05293	3.40816	2.57324	3.7164	2.6279	3.13373	2.78862	3.77393	3.27926	4.36516	2.65899	2.68035	3.08061	2.02211	1.04227	1.83141	3.93158	2.20407	3.42657	4.25704	2.64246	3.29246	4.20359	2.44331	1.12985	1.28713	2.69186	3.61295
ENSG00000082068	1.79155	2.41502	2.30552	2.43857	3.08998	2.26014	2.67501	2.86004	2.09825	2.2377	2.03145	3.3692	1.97596	2.89977	1.92965	3.07863	1.96102	2.36625	2.13613	2.55539	3.08934	2.58944	1.83652	2.30146	2.26965	2.64159	2.99436	1.94657	2.04968	2.24941	2.79009	2.1541	1.80024	2.01777	2.08885	2.30439	1.58496	2.38084	2.31036	3.40361	2.71696	2.95838	2.29754	2.96911	1.80665	2.51544	2.21803	2.12019	2.43388
ENSG00000258064	0	0	0	0	0	0	0	0	0	0	0	0	0	0	0	0	0	0	0	0	0	0	0	0	0	0	0	0	0	0	0	0	0	0	0	0	0	0	0	0	0	0	0	0	0	0	0	0	0
ENSG00000186723	0	0.0379177	0	0	0	0.268399	0	0	0	0	0.0691884	0	0.0268248	0.0825873	0	0	0	0.0951872	0	0.0978477	0.110376	0	0	0	0	0.0305968	0	0.132735	0.0734196	0.118619	0.0606497	0	0.0186966	0	0.0347456	0.0271437	0.146423	0	0.437773	0.0272861	0.0498761	0.0317017	0.17779	0.0355427	0.0517963	0	0.0353555	0.104282	0
ENSG00000137948	0	0	0.00485755	0.0351421	0	0	0	0	0	0	0.00611398	0.0912014	1.15165	0.029096	1.10018	0	0.0102356	2.28503	0.0054583	0.00872577	0	0.0356641	0.00559929	0	0	0	0	0	0.038548	0.0191108	0.0238977	0	0.569246	0	0.0181266	0	0.00498738	0.0535177	0.0179752	0	0	0.00415035	1.56629	0	1.51985	0	0.00925279	0.00466687	0
ENSG00000165312	2.58294	3.58087	4.05691	3.73739	2.35978	3.02967	2.55525	4.13236	2.99065	3.45395	3.16307	2.55496	2.76182	2.88548	3.95606	2.2429	3.07156	3.64873	2.88686	4.1786	3.23788	2.38299	3.6283	2.68969	3.19678	2.74608	3.1858	4.11221	3.06856	3.26268	3.02229	2.92342	3.23387	3.0868	3.31187	1.99954	2.665	2.52075	3.53028	3.15538	3.75377	2.96557	2.97102	4.56166	3.33108	3.16809	2.96835	2.58573	2.04236
ENSG00000136319	1.15106	0.818332	2.44683	1.49411	1.39035	1.6596	0.709638	1.3801	1.14909	1.32338	1.08465	0.282717	2.58059	0.807826	1.4464	1.62684	1.008	1.69044	1.60075	1.17531	1.15244	1.37344	1.04095	2.00354	1.28466	1.14984	1.82484	1.11972	1.78696	1.2555	1.68941	0.862697	1.63782	1.15159	0.889549	1.63769	1.25718	0.409143	1.02294	0.576195	2.2374	1.75213	1.58411	1.03261	0.82245	0.951737	1.15504	1.15884	0.926348
ENSG00000249915	3.34407	2.2534	3.06778	3.18636	4.65534	3.15008	3.32159	4.38106	3.01304	2.73095	2.74924	1.78189	2.77815	2.69043	2.5238	4.27247	3.06732	4.11214	2.91089	3.45924	4.33286	4.00543	2.61524	3.67538	3.16305	3.49031	3.99028	3.33153	3.1299	3.41599	3.57313	2.67397	2.64339	3.04305	2.98097	3.51218	3.20793	2.6105	3.14215	4.14621	2.8645	3.83849	2.97614	4.07519	3.08023	4.11205	3.5278	3.03995	3.37921
ENSG00000181991	2.1857	2.37518	2.46644	2.90787	2.75264	2.08622	2.71774	2.82433	2.50319	2.42997	1.9824	2.85063	2.2052	3.33126	2.19555	2.87667	2.37455	2.13628	1.87899	2.11761	2.76668	3.69486	2.19548	2.26382	2.37474	2.28956	2.48003	1.97132	2.54868	2.76077	2.88171	2.54015	2.45842	2.05794	2.21065	2.56339	1.8803	2.35094	2.06618	2.61714	3.11346	1.78033	3.32829	2.30229	1.90975	2.25887	2.70983	2.14571	1.96315
ENSG00000079819	0.646535	1.73852	2.90286	3.47865	1.21601	2.03175	2.10935	1.4442	1.98982	2.39483	2.51705	0.45069	1.89747	0.237313	1.74031	1.98203	2.13747	1.21301	1.54868	1.92039	1.85387	0.718736	2.27268	1.47671	2.90432	2.16266	2.45993	1.85872	2.44919	2.24467	1.81446	2.7176	1.96883	3.38776	1.09336	0.809067	2.53963	0.23927	1.25339	0.832843	2.60674	2.19265	3.41901	1.62773	1.05562	1.80376	2.22796	1.97399	2.9078
ENSG00000044524	0.156216	0.213153	0.927781	2.4158	0.421608	1.14504	0.346994	0.156357	0.282285	0.282503	1.1783	0.109294	1.43826	0.224877	1.15771	0.469159	0.250439	0.114638	1.04157	0.458651	1.6006	0.112721	0.0536378	0.0149829	1.73487	1.58491	0.568319	0.703194	0.447236	0.179864	1.16822	1.32842	0.512151	0.831449	0.0862126	0.173698	0.682508	0.0250711	0.145144	0.178669	0.576963	0.607709	0.804109	0.58888	0.187157	0.159889	0.370139	0.1876	0.51566
ENSG00000211452	0.0954689	0	0.0544074	0.0530616	0.0217005	0.0896195	0.0221069	0.201111	0.043462	0.0453729	0.0902109	0	0.0132749	0.0276436	0.0431797	0.0262336	0.0384992	0.0663048	0.0709301	0.0808056	0.0982743	0.307629	0	0.0326633	0.07985	0.0449855	0.0125975	0.0203992	0.59865	0.036082	0.0450539	0	0.045616	0.0342107	0.0510512	0.026743	0.235821	0.0579903	0.0339496	0.0268833	0.024782	0.0618069	0.0707228	0.0692091	0.0384468	0.698856	0.0519421	0.0263903	0.0603796
ENSG00000143793	2.36157	1.95349	2.80222	2.46849	2.6467	1.92538	2.36258	3.68216	2.75053	2.26948	2.1406	3.55664	3.04558	3.81044	1.80511	1.98011	2.2533	2.53367	2.92403	2.16115	1.97117	3.83742	2.56596	2.5499	2.02494	1.93516	2.8733	1.4355	2.11679	3.0911	3.21823	1.5739	2.58972	2.30836	2.45517	2.73639	1.90776	3.23304	2.21834	4.88312	3.08872	2.18325	2.39875	2.27487	2.10752	2.55725	2.51245	1.75821	2.18154
ENSG00000134333	7.9566	8.28995	7.43329	7.03311	7.65459	7.91032	9.58184	5.65183	6.77778	8.06325	8.06137	6.03247	6.48937	6.52093	7.16555	7.85155	8.60704	6.56585	7.27164	6.97205	8.32709	5.81019	9.09421	7.49438	7.56107	7.77261	6.88237	7.6971	7.42016	8.8693	6.83183	7.0608	7.16749	6.65185	8.01506	7.67655	7.26708	6.43416	8.27805	6.98755	6.38158	7.20111	7.53015	6.7096	7.93756	6.7078	8.06559	8.3363	7.03405
ENSG00000143184	1.59946	0.847388	1.30154	0.728294	2.29908	0.915689	0.0184754	2.50715	2.0166	1.00195	0.265398	0.306204	1.03515	1.37774	0.251198	0	0.581708	1.18816	0.224348	0.683348	0.897595	0.110165	0.414545	1.4095	0.789378	0.397516	1.19431	0.431518	0.280524	0.979932	1.14923	0.244229	0.678621	0.6968	0.02863	0.169838	0.661654	0.837845	0.662649	0.602242	1.23841	0.908316	0.553154	1.18366	0.927291	0.810868	0.407501	0.683538	0.484963
ENSG00000114062	2.20723	2.51549	3.52202	2.64506	2.78368	2.93212	2.52464	3.62874	2.82777	2.64409	2.45383	1.62337	2.78665	1.24345	2.98753	2.61196	2.75856	3.2868	2.37733	3.51053	2.82456	2.49971	2.89753	2.87995	2.47419	2.57665	3.00786	2.99174	3.66207	2.74297	3.2143	3.39622	3.04259	3.3523	2.83652	3.07426	3.08363	1.88622	2.6186	2.30817	4.7004	3.26716	3.42963	2.77501	2.63178	3.18226	3.26244	2.62948	3.00708
ENSG00000119772	1.16327	0.707111	2.65248	2.03976	1.43474	1.9438	0.823366	3.25682	2.06148	0.871676	1.37095	0.73016	2.92874	1.29647	1.83112	1.59649	0.715286	1.42767	0.876921	2.1057	1.36192	1.7923	1.58805	2.84931	1.61352	1.6316	2.52364	1.32581	2.37448	2.07991	2.0997	1.60329	2.35347	1.99339	1.55795	1.59762	1.95395	1.07163	1.08276	1.04677	2.20014	2.56145	2.04424	1.59892	1.19128	1.48614	1.40318	1.16093	2.13852
ENSG00000138735	0.307769	0.373514	1.76746	1.93628	0.487044	1.08115	0.347285	1.44506	1.30221	0.332926	0.958558	0.215617	0.845035	0.106721	1.26033	0.767701	0.191636	0.346365	0.991478	1.08335	0.825079	0.913848	0.242156	0.999754	0.941946	0.903069	2.40755	0.803865	1.09262	0.531462	0.898385	2.23714	2.28738	1.61162	0.220793	1.25507	1.30415	0.0707583	0.201743	0.342382	1.83038	0.499638	1.56909	1.24196	0.365052	0.957587	0.666908	0.271265	1.07829
ENSG00000131845	2.27242	1.64326	1.3741	1.5573	2.25304	1.65891	1.74126	2.56555	2.00845	1.96392	1.78576	0.285881	1.7234	0.601448	2.20838	2.2644	1.55988	1.79977	1.99012	2.11201	1.98086	1.87781	1.60079	1.14115	1.98496	2.40227	2.15589	1.90043	2.16898	1.87446	2.16061	1.71216	1.87408	1.66371	1.71229	1.63358	1.74463	0.625938	1.51738	0.715952	2.21193	2.77014	1.43605	1.91366	1.51311	1.87846	1.81182	1.92367	1.5777
ENSG00000182220	5.26441	5.53877	5.70605	5.81502	6.14542	5.58787	5.19539	6.18694	5.98715	5.11983	6.34883	4.7082	5.22975	5.03572	5.43265	6.90249	5.90415	4.697	6.10757	5.75595	6.03677	5.08908	5.42932	5.7987	5.51337	5.64978	6.14683	5.58379	5.6795	5.62721	6.07058	5.28932	5.65266	6.86787	5.36415	5.39981	5.98978	4.83796	5.42876	6.44629	6.05377	5.24726	5.42546	5.68229	5.37159	5.32375	5.52453	5.03689	4.82428
ENSG00000166896	1.96095	2.15206	3.0124	2.5152	2.75071	2.8127	2.4605	3.39484	2.24114	2.02479	2.57209	1.33926	2.5722	1.93717	2.09839	1.67967	2.25574	2.61749	2.19836	2.42388	2.29819	3.11932	2.67275	3.34296	2.22436	2.08022	3.17032	1.94707	2.36338	2.33768	3.04583	1.63785	3.05565	2.76618	1.67586	1.88356	1.91706	1.18787	2.23477	2.03381	3.63602	2.34831	2.53793	2.12734	1.83737	1.86447	2.18721	1.60183	1.83079
ENSG00000167676	0.616773	0.0336562	0.408533	0.191016	0.402496	0.148912	0.375513	1.56109	0.515264	0.0712022	0.553197	0.473712	0.893975	0.092398	0.135411	0.471264	0.391166	0.130009	0.224538	0.187648	0.132034	0.322965	0.210157	0.547435	0.324912	1.48396	0.805723	0.23592	0.637154	0.317399	0.752715	3.77386	0.16974	0.1195	0.0788444	1.33248	1.01951	0.0471346	0.228213	0.108146	0.574798	0.252176	0.246079	0.501411	0.05052	0.683082	0.127437	0.280732	0.328067
ENSG00000228696	0.0351579	0	0.133575	0.0502744	0.135361	0.123188	0.0705433	0.449968	0.247904	0.234218	0.132219	0.364343	0.0565825	0	0.0293351	0.0630388	0.121372	0.0815381	0.343327	0.095656	0.088884	0.196222	0.0675506	0.173747	0.065119	0.0801182	0.0863322	0.0365726	0.0589767	0.038993	0.0566321	0.213351	0.161117	0.167748	0.134106	0.0217352	0.0991567	0.0394617	0	0.0785466	0.0334102	0.0950034	0.385924	0.0471543	0.0551328	0.0711633	0.0923365	0.0190806	0.0967377
ENSG00000102007	7.1052	7.88312	8.63565	6.843	8.41473	8.09648	8.35433	7.8597	7.64969	7.93108	7.78664	8.65094	6.9122	7.07214	8.06304	8.60922	8.12905	7.18202	7.7082	7.85817	7.9486	8.08401	8.46067	7.28573	7.65717	7.81432	8.25661	7.88099	7.58681	8.38976	8.64256	7.28868	8.11146	7.08035	7.57429	8.61029	7.72271	8.02397	8.01912	8.49713	8.2112	7.13296	8.05805	7.94852	7.85414	8.265	8.18367	7.39424	7.2628
ENSG00000118094	0.0156443	0	0.0456609	0.019252	0.0310248	0.0466032	0.0393978	0.0291819	0.0209429	0	0.0652625	0.0714742	0.00953258	0	0.0156324	0.344577	0.0277138	0.0411176	0.00742932	0.0236468	0.0711505	0.0163013	0.00762109	0	0	0.0848424	0.0358469	0.00490279	0.0263634	0.0259677	0.145566	0.0682266	0.180937	0	0.0123693	0	0.111277	0	0.0163312	0.0193303	0.0266417	0.0280313	0.0653336	0.0982637	0.00928445	0.0784298	0.0125881	0	0.0774791
ENSG00000048162	4.16951	3.68544	2.91699	3.20745	3.8751	2.70948	5.01141	2.80098	3.6793	4.0585	3.11321	4.43558	3.02801	4.61791	2.57973	2.70722	4.10026	3.7409	3.36846	2.47659	3.36357	4.89565	3.3742	3.55658	3.16039	3.68115	3.81594	3.40006	2.77906	3.91469	3.26931	3.03392	3.72664	2.96383	2.8118	3.60215	2.75323	3.88039	3.01126	4.38395	2.97054	3.43336	3.82404	3.39927	3.28223	3.75595	4.00657	3.64396	3.05305
ENSG00000146535	3.7937	3.5438	4.48883	4.39812	4.11651	3.62459	4.08752	2.95102	4.40005	4.30181	4.26495	2.17171	3.79824	3.16759	4.81808	4.89646	3.85124	4.36554	3.76928	3.53133	3.82166	2.13852	4.44003	5.17295	4.37321	4.35355	3.76484	3.76292	4.42306	4.62935	3.78517	3.93151	4.3454	4.73695	3.74861	3.66946	4.16262	2.17674	3.31978	3.46416	4.26199	4.97789	3.39135	4.17027	3.56222	3.29983	4.66572	3.89258	4.1736
ENSG00000135547	0.684851	1.13115	1.71945	1.3067	1.32278	1.27368	0.699103	1.43401	1.89704	0.495321	2.46447	0.614147	1.06545	0.537023	1.19137	1.69004	0.525129	0.4767	1.71525	1.99045	1.35896	1.12038	0.812528	0.543536	1.77909	1.59112	1.88814	0.908664	2.00414	0.860184	1.26286	1.98705	1.27029	1.05576	0.367239	0.952034	1.93354	0.129484	0.720346	1.32832	1.08754	1.38295	1.65043	1.20098	0.134135	1.39747	1.06952	0.541967	1.64846
ENSG00000168306	0.188207	0.193456	0.308748	0.969508	0.226852	0.583135	0.942794	1.12114	0.33943	0.100029	0.431016	0.0446175	0.444432	0.0645522	0.498993	0.312014	1.16828	0.596966	0.200379	0.140385	0.222484	0.25914	0.155167	0.0511764	0.540331	0.307127	0.265751	0.512636	0.459527	0.42165	0.371707	0.663982	0.436514	0.581743	0.191562	0.370938	0.513808	0.109461	0.0466373	0.100703	0.392308	0.142136	0.375298	0.55799	0.233494	0.0776265	0.129533	0.631775	0.152127
ENSG00000064102	3.26351	3.46822	3.23851	4.38127	3.88225	3.79033	4.60954	3.68502	3.26873	3.14728	3.48352	1.44105	3.4867	3.61874	3.89047	3.02592	3.75095	3.86423	3.10644	3.28401	3.40045	3.94773	4.07734	4.32914	3.4926	3.60624	3.55259	3.59548	3.94677	3.59805	3.45824	3.44851	3.52158	3.72115	3.64482	3.81327	4.88727	1.90654	3.83288	3.06884	3.73065	3.88278	3.99099	3.71084	3.46166	3.90982	3.21124	3.40554	3.08439
ENSG00000148426	2.31827	2.06732	2.15438	3.18198	1.20643	1.69417	2.86141	3.37772	1.1666	2.50728	2.11486	4.28685	2.50638	4.04115	2.22404	3.31486	2.9833	3.08333	1.4424	2.38123	2.61665	1.2992	2.18211	2.66558	1.80468	3.64503	3.47917	3.13134	2.71933	1.83449	2.51349	1.90678	2.43904	2.57609	2.61088	0.267809	0.64656	1.75544	2.17809	1.99566	3.57572	3.77762	2.81853	2.99225	3.02991	3.27753	3.19789	3.08199	3.51168
ENSG00000115685	3.81367	3.39287	3.74853	3.73096	4.11953	3.14964	4.19831	4.36844	3.84995	3.87724	3.46184	5.38649	3.65587	5.53177	3.79035	3.75588	4.20164	3.84413	3.76327	3.9883	3.86652	4.11152	4.04659	3.70766	3.79968	3.55375	3.60321	3.65958	3.95188	4.19197	4.45541	3.80094	4.01898	3.5172	4.22297	4.41529	3.74849	5.48211	3.06233	4.09615	3.64175	3.23485	3.51054	3.46558	3.53071	3.15363	4.30416	3.73744	3.9635
ENSG00000167332	0.0173229	0.00749867	0.723743	0.123406	0.034334	0.0104573	0	0.00814222	0.0905862	0	0.0633116	0.0596378	0.0314443	0.0220078	0.0680263	0.0465691	0.10462	0	0.171007	0.0196765	0.0354743	0	0.0499224	0.117573	0.0533632	0.0120519	0.0100185	0.0481583	0.0483113	0.0845657	0.0240407	0.449772	0.0857766	0.0539922	0.0272673	0.123265	0.0150002	0	0	0.0107403	0.41186	0.0186947	0.19229	0.041642	0.0204933	0.0526095	0.0277471	0.0279434	0.0386721
ENSG00000130649	0.0129474	0.10598	0.131874	0.0285603	0.0383803	0.102773	0.0544408	1.35962	0.219622	0.0260034	0.0883214	0.065151	0.400662	0.0960318	0.129194	0.0794044	0.0229528	0.0585717	0.167285	0.61369	0.0757046	1.08914	0.0858474	0.441981	0.054146	0.0321536	0.780449	0.0352988	2.08709	0.142897	1.61428	0.0636928	0.365148	0.181109	0.0564024	0.904594	0.695379	0.146669	0.202395	0.0843729	0.201631	0.0351424	0.0695243	0.704353	0.0365014	0.10783	0.0412207	0.0188279	0.0403805
ENSG00000100029	5.05804	4.72233	5.0106	4.78184	5.20856	4.93783	5.10793	4.7543	5.33196	5.24673	4.06559	6.00327	5.01829	6.89737	5.36472	4.13789	4.82254	5.33841	4.6957	4.35299	3.6002	5.26763	4.04761	5.43813	5.0594	4.93153	5.99237	4.55288	4.59415	4.69555	4.52728	4.22739	5.1728	5.3058	5.01055	5.317	4.8745	6.35158	5.08667	6.67493	4.48151	4.34207	5.14395	4.87221	4.31392	4.88804	4.54785	4.60504	4.8622
ENSG00000255508	0.475624	0.443587	0.577448	0.920248	0.63135	0.325703	0.488954	0.695358	0.568964	0.372521	0.657448	0.738634	0.576415	1.16091	0.911113	1.0253	0.1922	0.415082	0.681471	0.561264	0.722479	1.21963	0.401685	0.924655	0.689043	0.721607	0.622121	0.290445	0.669859	0.470414	0.774316	0.707921	0.658396	0.729924	0.716499	0.725197	0.465927	0.486159	0.468183	1.26297	0.964197	0.307839	0.317106	0.926667	0.311658	0.722404	0.504393	0.413972	0.483224
ENSG00000119471	2.80833	3.59673	3.10973	3.5487	3.15346	3.7792	4.26647	3.87034	2.41403	4.00074	3.45726	3.29877	3.09738	2.97249	3.33564	3.53932	4.15743	3.05157	3.2417	4.46961	3.35534	3.49665	3.66868	3.53758	3.87965	3.7656	2.88769	3.9693	3.7076	3.75617	3.89435	5.54896	3.5073	3.93958	3.78321	3.98732	2.69743	2.80464	3.45906	3.00566	3.29112	3.54808	3.45108	3.47911	3.22195	3.84372	4.16521	4.07998	3.30631
ENSG00000172345	0.965165	2.56224	0.810675	0.87936	2.39907	1.77507	1.75904	1.3899	1.64043	2.96387	0.94362	0.467203	1.36403	0.106493	1.30674	0.483371	2.08477	1.17333	1.07671	1.65278	2.77507	1.33513	1.90142	1.29812	1.96052	0.955139	0.489668	1.80804	1.5951	1.04732	1.36508	0.66907	0.890213	1.80593	2.06391	1.28371	1.15627	0.385568	1.91735	1.00639	1.60978	1.30301	1.81422	1.46478	1.01729	1.8103	2.40062	2.27735	0.459875
ENSG00000132300	2.53115	2.39344	2.81266	2.44226	2.45765	1.71445	2.41276	3.40145	2.38677	2.31691	2.17355	2.62752	2.63973	1.39798	2.39785	2.14053	2.39077	2.54354	2.1821	2.27312	2.46956	2.47525	2.95395	2.5284	2.30934	2.72221	2.85598	2.64846	2.6768	2.42051	2.75892	2.45219	2.40913	2.50157	2.53496	2.41721	2.414	1.18318	2.80809	2.23438	3.02125	2.77996	3.1255	2.55296	2.08407	2.63834	2.86394	2.34006	2.68855
ENSG00000175894	0.0111514	0.0334158	1.15233	0.187303	0.305593	0.0529505	0.00567396	0.106144	0	0.483257	0.0293946	0.124815	0.272138	0	0.0111429	0.0498009	0.0392892	0.0581796	0.0774021	0.0418084	0.0171994	0.023148	0.042863	1.27851	0.0548178	0.0383562	0.0507599	0.0104478	0.0125686	0.0123791	0.0308131	0.02687	0.165211	0.0857496	0.0349376	0	0.00965347	0.177391	0	0.0409625	0.156994	0.00402336	0.131259	0.035739	0	0	0.0872864	0.040215	0
ENSG00000100197	0.320214	0.0520791	0.343974	0.232632	0.553033	0.396635	0.0410291	0.484618	0.720322	0.266566	0.183474	0.412259	0.727911	0.366403	0.127283	0.0605343	0.0711105	0.379896	0.2407	0.461197	0.233386	0.374079	0.068039	0.0405692	0.0625336	0.211373	0.399986	0.0988805	0.400833	0.412717	0.698001	0.156635	0.282201	0.265119	0.138732	0.0856536	0.0943417	0.0408696	0.523486	0.683596	0.654928	0.126969	0.548547	0.298088	0.0359444	0.302007	0.032565	0.0246659	0.50101
ENSG00000162076	3.76081	3.40218	3.97884	4.04999	3.99192	3.78779	3.51465	3.64973	4.24127	2.73361	4.22949	4.96171	4.45854	5.63867	3.70605	3.10825	3.14479	3.94696	3.77075	3.43354	4.01697	4.02071	3.6729	3.75001	3.67776	3.20554	4.17524	3.11796	2.84035	3.2148	4.3821	3.73612	4.2827	3.33722	3.27071	3.19348	3.17593	4.39852	3.92832	5.15016	3.79894	3.65835	3.86862	3.71119	3.65061	3.76627	3.72428	2.82163	3.89215
ENSG00000182667	0.864286	1.12657	2.05747	2.0422	0.906933	1.75011	2.78692	0.557808	2.35531	0.729654	2.27641	0.612179	1.27997	0.383651	1.97832	1.22338	0.52969	0.269019	1.60209	0.710968	1.80105	0.491033	0.63901	0.551646	1.33253	1.77735	1.91373	1.44811	0.957566	0.643577	0.502094	0.960905	1.21115	2.23145	0.450291	0.579281	2.87815	0.0710178	0.386539	1.1557	1.36904	1.2631	0.59996	1.30043	0.343417	0.446686	0.89678	0.579754	1.08332
ENSG00000197919	0.124682	0.0907219	0.0181748	0	0.0634931	0.0513601	0.632364	0	0	0	0.0228487	0.144211	0	0	0.0215267	0.160964	0.247737	0.0190581	0.0603864	0.0163562	0.0440497	0	0.303194	0	0.0790413	0.0590658	0.0248271	0	0	0.0933327	0	0	0	0.0338588	0.0338819	0.103075	0.0370783	0	0.286791	0	0	0	0.0404174	0.0346594	0.0254791	0	0.101053	0.0174645	0
ENSG00000204519	1.31724	1.09615	1.53745	1.08172	1.71065	1.46077	1.81935	1.97095	1.03376	1.43463	1.06656	0.196431	1.45553	0.259275	1.31016	1.86613	1.31472	1.48235	1.16926	2.23579	1.40659	1.27073	0.726793	1.37531	1.36286	1.94093	1.17777	1.03	1.5537	0.816326	1.9749	1.0399	1.37003	1.40352	0.944952	1.25533	1.46931	0.20669	0.872478	0.495865	2.37682	2.71666	1.3374	1.5386	0.894871	1.23359	1.58856	1.73637	1.35242
ENSG00000229117	7.14459	7.50683	6.98263	7.73114	7.13229	7.79361	8.00719	7.83477	7.22958	6.9507	7.22612	8.40296	7.34469	8.08407	6.7286	6.27835	8.08687	7.18586	7.31016	6.44565	7.48895	8.99276	7.13687	7.95974	7.11212	6.99844	7.98775	7.37087	7.31788	7.74412	8.07573	7.21335	7.58891	6.94135	6.8581	8.03978	6.8491	8.35007	7.06156	7.33559	7.82063	6.98512	7.73131	7.2125	7.98644	7.9617	6.53417	6.87233	7.23714
ENSG00000057149	7.24768	7.37697	3.63635	2.62801	5.80079	8.41803	5.53965	4.24946	6.67167	3.74524	5.11192	2.16981	4.67393	4.89582	6.59018	1.42954	8.55776	6.05778	6.28859	4.64681	5.92808	6.03074	1.44898	5.13185	3.96359	4.45368	5.15592	8.95455	7.84435	2.98742	6.27926	3.28454	4.25612	5.96168	6.62999	6.11782	4.72631	3.89494	5.18861	4.27227	5.91078	3.04842	2.78975	5.90317	7.25488	5.48436	6.33669	7.69355	4.37303
ENSG00000100628	1.66996	0.6427	0.839043	0.994459	1.66999	2.51016	1.2704	0.701041	1.41736	0.23803	1.65414	1.88188	1.81199	4.75149	0.546798	1.19397	1.4632	0.762684	2.48188	1.30821	1.13197	1.61643	2.65462	1.20563	2.01606	1.69898	1.74792	0.348174	0.283731	2.86166	2.93275	3.03836	1.09783	0.283686	1.59045	1.74085	0.369418	1.18401	0.916589	0.381089	1.14537	1.06866	1.05585	1.07896	0.455154	0.612669	1.44984	1.80933	0.918525
ENSG00000158481	0.326365	0.503031	0.338956	2.6559	0.366486	1.75413	0.167072	0.267706	2.55178	0	0.904735	0.449982	0.584773	0.147536	0.786369	1.5453	2.25843	0.545409	1.11618	0.867504	2.1579	0.381134	1.37699	2.35811	1.80268	0.811893	0.992925	0.500968	1.78239	0.581794	1.04219	1.89671	1.62492	1.06182	0.319864	0.975977	0.58691	0.834047	1.43507	0.593095	1.32286	0.402656	0.630287	0.392413	0.500975	0.23074	1.43832	1.17782	0.712721
ENSG00000243543	0	0	0	0.0384173	0	0.0741773	0	0.0293096	0	0	0	0	0.110903	0	0	0	0	0.0814443	0	0	0	0.672199	0	0	0	0	0	0	0	0	0	0	0	0.0490322	0	0	0	0	0	0	0.0355687	0.0447863	0.220882	0.0501853	0	0.063354	0	0	0
ENSG00000173272	2.2274	2.23842	3.34993	3.58653	2.95286	2.93474	3.50055	2.88322	3.37156	3.00139	2.33164	5.07357	3.79969	5.25981	2.36698	2.54703	3.42198	2.67168	2.79	2.34822	2.73636	4.66272	3.23455	3.78224	2.57536	2.80453	3.50481	1.79678	2.04121	3.44787	3.82299	2.26481	2.53425	1.69046	2.45021	3.50833	2.16463	4.71525	2.31179	5.70077	3.70124	2.2421	3.46733	3.23333	2.59319	3.11464	3.03945	2.56806	3.04918
ENSG00000075914	2.79324	2.14621	3.19393	3.16015	2.57332	2.53429	3.65962	3.04999	2.83978	2.074	2.90396	3.398	2.99053	3.99797	2.3308	2.59425	3.05814	2.59688	2.62536	1.88602	2.31601	4.39232	2.88099	3.21805	2.12502	2.5786	3.482	2.70668	2.5491	2.90874	2.88735	2.62575	3.1428	3.39803	2.57063	3.39051	2.78858	2.96552	2.84593	3.68817	4.11916	2.54884	3.07994	2.56783	2.95721	3.9229	2.65355	2.49912	2.67244
ENSG00000197444	0.207336	0.232889	0.202469	0.52668	0.333203	0.954625	0.0132608	0.0324083	0.333557	0.370681	0.0411592	0.07925	1.02804	0.0811282	0.874001	0.364169	0.0077567	0.633933	0.0205561	0.153854	0.0660393	0	0.778611	0.618777	0.0429948	0	1.30567	0.91215	0.00982664	2.07522	0.260784	0.0279733	0.352338	0.150582	0.150681	0.103787	0.10221	1.95068	0.207955	0.134196	1.46719	0.952928	3.13334	0.197783	0.0103188	0.192654	0.963461	0.0623408	1.47097
ENSG00000168811	0.216063	0.111969	0.272373	0.515574	0.0598855	0.218928	0.240458	0.110604	0.374627	0.0802265	0.272045	0.109992	0.246261	0.0308881	0.0600239	0.0580446	0.0847531	0.073972	0.0344402	0.054731	0.132745	0.122503	0.0697972	0.367712	0.103355	0.191209	0.12207	0.0303208	0.321121	0.154867	0.320073	0.123363	0.388506	0.264624	0.0192476	0.0298828	0.207267	0	0.0379244	0.10251	0.312974	0.0434887	1.05373	0.0582862	0.111784	0.0972262	0.219132	0.105301	0.119102
ENSG00000137440	8.18892	7.29086	5.78234	6.98321	7.39466	6.01282	9.69995	7.73263	5.98713	9.09078	5.30742	7.50777	7.24069	7.42682	7.21708	8.72575	8.09168	8.99582	6.78313	8.22233	8.16255	6.91879	6.95431	4.49885	7.61368	5.96494	6.71505	7.39073	8.24036	5.96201	3.98905	5.7572	7.01355	6.32731	10.322	6.97539	4.01562	7.94427	7.59035	7.87506	6.19997	8.3088	8.3107	10.2572	8.54978	8.7763	9.0404	6.87884	5.76351
ENSG00000158483	0.657937	1.5303	2.12569	1.79057	2.05435	2.07234	1.76844	1.31795	1.65656	1.72081	0.684304	0.838742	3.69043	2.89085	2.1183	1.79462	1.52051	3.98664	1.78145	1.77195	1.59201	2.51306	1.67306	1.54133	1.6745	1.88731	1.41686	1.57309	1.92743	0.916876	2.33899	1.14802	1.80984	2.01112	3.3216	2.23242	2.76497	1.89689	1.73994	4.60558	2.5564	1.59693	2.45577	1.80337	1.5502	2.2094	1.5054	1.67676	1.19724
ENSG00000132031	0.26337	0.206146	0.617704	2.48885	0.573417	2.26083	0.854423	0.183382	1.00523	0.159522	1.61918	0.240514	0.360812	0.252348	1.42758	3.22447	0.19969	0.186102	0.528656	0.325357	1.12111	0.2735	1.71888	0.670981	0.650043	1.55555	1.21153	1.00787	0.427647	0.795127	0.0654799	1.08319	0.987502	1.5124	0.41567	0.446649	2.23167	0.0107862	0.70254	0.389269	0.411094	0.82934	1.21321	1.38375	0.178587	0.125947	1.68214	0.410089	1.9365
ENSG00000165195	2.15375	2.33665	2.61158	1.77366	2.34503	2.29894	2.53306	2.56893	2.06126	2.53694	2.35544	1.44092	2.05041	1.86855	2.68946	2.63181	2.3014	2.03505	2.10512	3.29869	2.6762	2.35114	2.17001	2.77208	1.97643	1.80812	2.00477	2.4766	2.79975	2.40718	3.00266	1.56174	2.18706	2.04299	2.95029	2.02764	2.30288	2.39164	2.63512	2.68378	2.56136	2.25595	3.09834	2.56304	2.86924	3.20914	2.99281	2.26225	1.71405
ENSG00000070444	2.03016	1.87979	2.86599	1.72329	1.74405	3.06573	2.5733	2.6296	2.21279	2.34811	1.9238	1.23655	2.53844	1.60931	2.66406	2.43059	1.82458	2.00331	2.13173	2.72381	1.9732	2.35905	2.33165	1.80595	2.09873	2.15574	2.30166	2.61543	1.90511	1.96438	2.211	1.72527	2.41882	1.662	2.82067	2.29888	2.72111	1.18827	2.12287	1.80965	2.53537	3.42502	2.58615	1.99307	2.20866	2.70211	1.9328	2.70276	2.70048
ENSG00000066697	3.23408	3.09903	3.43058	3.82446	3.8315	3.85548	4.59386	3.19768	3.66351	4.02514	3.71367	2.69541	2.80968	3.0779	2.67272	3.26867	3.21138	2.16298	3.70651	3.26665	3.57236	2.64045	3.68239	3.5363	3.37964	3.43473	3.49812	2.5821	2.43016	3.85702	3.13197	3.6973	3.74354	4.04252	3.40738	3.08539	3.40616	3.91218	3.44253	3.51145	2.68821	3.14994	3.74214	3.56581	2.6865	2.98524	4.18691	3.21137	3.01683
ENSG00000182613	0	0	0	0.0944214	0	0	0	0	0	0	0	0	0	0	0	0	0	0.0231464	0	0	0	0	0	0	0	0	0	0	0	0	0.0362617	0	0	0	0	0	0	0	0	0	0	0.0188776	0.0247134	0	0	0	0	0	0
ENSG00000083444	5.34977	5.05961	4.98185	5.14495	5.29895	4.62972	5.00647	3.31414	5.23675	4.96588	6.59153	6.1231	4.32771	5.72876	4.92419	6.27151	5.07106	4.42876	6.75786	5.30178	5.25774	4.02009	5.1417	6.22412	5.47269	5.85612	5.40048	4.80265	4.71234	4.75583	4.54433	4.64805	4.99656	5.5087	5.2725	4.18098	5.62346	5.26447	4.35141	6.73286	4.41682	4.73583	4.21829	6.05249	3.7491	3.29893	4.86167	4.62878	5.25765
ENSG00000196748	0	0	0.0341077	0	0	0.0954385	0	0	0.0539115	0	0	0	0	0	0	0	0	0	0	0	0	0	0	0	0	0	0.0464985	0	0	0	0	0	0	0	0	0	0	0.940432	0.0421452	0.0498037	0.439257	0	0.372816	0	0	0.0815997	0.0643853	0	0.252844
ENSG00000007312	0.350732	0.77598	0.820482	4.18027	0.396068	0.487272	0.346026	0.977485	3.06149	0.356619	1.02527	1.41712	2.07897	1.15083	1.07609	0.583298	0.658637	0.832976	1.58032	1.13392	1.36319	0.731684	0.769712	0.3039	3.65444	1.40945	0.469756	1.06599	0.913787	0.792165	3.53932	2.21315	3.20458	1.38907	0.127247	1.13804	1.03299	0.73441	0.40293	1.55061	2.06486	0.623175	0.732456	0.897333	1.57785	1.44702	0.644387	1.48327	0.292871
ENSG00000145982	2.51469	2.83401	3.54693	2.97356	3.00305	2.63819	3.39266	2.67958	2.88605	3.23427	2.39693	3.73575	2.62276	3.74043	2.79542	3.18583	3.20012	2.81135	2.80788	2.8583	3.0072	4.41599	3.44435	2.37669	3.09579	2.65021	3.02089	2.96527	3.11345	2.96216	3.18228	2.95661	2.53186	2.69717	3.10408	3.87349	3.31473	3.54956	2.64482	3.64089	3.1667	2.79885	2.50987	3.31203	2.96963	3.34334	2.90916	2.80917	1.33249
ENSG00000181381	2.8634	3.81309	0.995983	0.819538	2.20578	1.50629	2.14043	1.55265	1.47202	3.23275	1.55414	1.38149	1.23909	0.947035	1.74533	1.20135	3.16974	2.25666	1.56277	2.09472	1.59749	0.845721	1.69312	0.810405	2.17237	2.07272	0.653467	2.81972	2.04155	2.34188	1.0851	1.38017	1.63162	2.95762	2.75002	1.28379	2.72336	0.308809	2.30829	1.68669	1.13335	2.55758	1.04482	1.98848	1.12408	1.80646	3.11277	3.13577	0.711108
ENSG00000112303	0.520863	1.02872	0.811477	1.46545	0.100631	0.162245	0.0191794	0.486739	1.04284	0.115129	1.94827	0.419636	1.19021	0.333294	0.244064	0.0171065	0.611068	1.26156	0.811444	1.46336	1.7081	0.552778	0.546821	0.0376796	1.35719	0.469165	0.213654	1.84139	1.56982	0.312018	1.96874	0.80311	0.889043	1.22097	0.014935	0.396382	0.342449	0.494457	0.477264	0.277292	0.698819	0.191896	0.313371	2.10459	0.569248	0.462677	0.926167	0.943097	0.0421316
ENSG00000214193	3.63394	2.09818	1.10655	0.640562	2.25818	2.29809	2.1588	1.38978	3.01196	1.52146	2.74724	1.58728	1.2113	1.36946	1.34372	1.17858	1.22105	1.72673	2.60106	2.40567	1.84188	1.32378	1.9525	0.506367	0.969287	2.14035	0.427009	2.49972	1.35167	1.11275	1.11793	0.533813	1.0621	0.993788	4.08608	1.79165	0.808534	1.97408	3.38862	1.54058	1.86136	2.34566	0.964842	1.89756	3.46677	2.70204	2.10129	2.04479	1.70613
ENSG00000142552	3.3351	3.8022	3.47684	5.24161	3.57259	4.25686	4.02339	1.64879	5.19473	2.7559	6.04221	4.19956	3.31028	5.39066	3.86279	5.388	1.80999	2.03774	4.57253	2.09929	5.01185	2.39226	2.98201	3.48152	4.41486	5.0424	5.04793	2.60213	4.06345	2.94152	2.66922	5.17227	4.23906	5.10313	2.5533	2.28263	5.6196	3.25417	1.93726	5.79809	2.47562	4.0925	3.04105	5.25185	1.48348	2.39611	3.67707	2.04257	4.25896
ENSG00000149923	5.74427	5.08973	5.77402	5.14653	5.54781	5.65616	5.46415	5.33182	5.43939	5.4315	5.17669	6.57551	5.29421	6.86482	5.42865	4.87626	5.63754	5.85224	5.02604	5.30575	6.00315	5.90461	6.06998	5.71905	5.28129	5.04657	5.33332	5.19744	5.42136	4.84715	5.77824	4.89358	5.65566	5.26771	5.64632	5.35073	5.52831	6.44641	5.31476	6.35326	4.94273	5.82965	5.13562	5.36374	5.77159	5.69041	5.60776	5.45624	5.49324
ENSG00000188385	0.0548629	0.0169289	0.68103	0.434205	0.0859256	0.0274704	0.0427919	0.104039	0.290688	0.046258	0.051427	0.0673575	0.884145	0.0248987	0.0548215	0.123588	0	0.342592	0.197659	0.0586224	0.0201942	0.0204244	0.0063777	1.03784	0.036474	0.0449778	0.811454	0.018369	0.0147612	0	0.0450461	0.0975698	0.827567	1.08599	0.0610377	0.0438563	0.0802607	0.0350671	0.118632	0	0.831498	0.0281364	1.17734	0.112459	0.00389044	0.104032	0.0570251	0.0106123	1.23811
ENSG00000149925	7.89852	7.72351	8.45361	7.55462	8.00074	8.50641	7.90522	7.31946	7.71689	7.6958	7.72485	8.04511	8.57472	9.0607	7.43942	7.43322	7.98383	7.76426	8.538	7.71629	7.73662	7.96353	9.43717	8.9208	7.89832	7.61251	8.13057	7.06158	7.55021	7.86965	8.341	8.41412	7.79507	7.67106	7.68181	8.25408	7.76421	8.40816	7.40151	7.89636	6.72885	7.49027	8.1936	7.74153	8.30305	7.84639	8.02582	8.20957	8.58483
ENSG00000271321	0	0	0.0160819	0	0.00953418	0.0115117	0.00971348	0	0.0128122	0.0319102	0.0101461	0	0	0	0	0	0	0	0.0180621	0	0	0.0198644	0.0185266	0.00960343	0	0.0132663	0.0110288	0	0	0.0523227	0	0	0.0241281	0	0	0.0117611	0	0	0.0199009	0	0.0108945	0.0205737	0.0180084	0	0	0	0.0305263	0	0
ENSG00000144959	0.693264	1.6386	2.66207	4.22714	3.46441	2.26634	2.70213	3.30864	2.59615	1.90252	1.91811	0.899598	3.09382	1.23814	2.10387	4.37115	2.59258	2.68712	2.78608	3.64987	2.82866	1.87863	3.09954	3.94219	2.5458	2.45938	4.47275	2.53067	3.75857	2.16666	2.63561	2.21294	3.9165	4.53698	1.84055	2.94985	2.58214	0.600141	2.20913	0.879039	3.34728	1.94928	5.10328	3.47162	1.83337	2.61637	3.54924	2.12681	4.3563
ENSG00000139613	2.62111	2.8775	3.6386	2.88377	2.98715	4.27669	3.13567	3.50286	2.35686	2.57161	2.44777	0.55805	4.00127	0.612533	3.06468	3.78299	2.91586	3.55212	2.6637	3.40531	2.822	3.033	3.48171	3.04481	3.38536	3.02286	3.36084	3.26566	3.62108	3.13089	3.90863	3.16241	3.65561	3.29532	2.98801	2.70757	3.15634	0.835904	3.15229	0.763311	3.78534	3.22966	3.71907	2.95433	2.85095	3.19703	3.65021	3.2343	3.60124
ENSG00000111783	0	0.00317978	0.00929687	0.0135738	0.00367326	0	0	0	0	0	0	0.050661	0.0398253	0.00935938	0.00368192	0.0022249	0	0.0162139	0.00348996	0	0	0.00767009	0	0.00739053	0	0	0	0	0	0	0.0254355	0	0	0	0	0	0.00318867	0	0.00384723	0	0.0373546	0.00530162	0.996295	0	0	0.00754244	0	0	0.0649006
ENSG00000197893	0.00436543	0.00376731	0.0183042	0.0632376	0	0.0104937	0.143593	1.06969	0	0	1.14553	2.28754	0.0105945	0.0438353	2.31322	0.587799	0.0077567	0.045643	0	0.00661167	2.63641	0.00908468	1.89781	0.0432469	3.6998	5.88871	4.82113	0	0.00492169	0	0.0181307	8.65989	1.2606	0.027343	0.217536	3.70062	0.972535	0.0291903	2.50508	0	0.0393202	1.90211	1.03976	4.31971	0.0307377	0	2.53571	0.00706129	3.6507
ENSG00000117602	2.3156	2.0476	3.10552	2.2344	2.5485	2.26024	2.87253	2.71988	2.66789	1.82398	2.45175	1.00756	2.34331	1.30397	2.35878	2.8609	2.40817	1.95013	2.21626	2.52772	2.30597	2.25108	2.88825	1.64569	2.52501	2.24737	1.8734	2.82894	2.86224	2.85417	3.00059	1.80002	2.89708	2.52574	2.31501	2.89301	2.84011	1.33961	2.91781	2.07844	2.29184	1.77203	2.67274	2.22045	2.75129	2.15102	2.62428	2.67787	1.74466
ENSG00000054983	1.28452	1.19637	1.39498	1.67452	1.79085	1.80779	0.537801	2.02247	1.58539	0.440211	1.62132	0.313497	1.7517	1.93611	1.73282	2.41209	0.942874	1.73924	2.30252	2.18769	1.60163	1.10053	1.10648	2.28967	1.70256	1.39361	0.783554	1.04721	2.70612	1.83077	2.30821	2.03467	1.51942	2.01467	0.827652	0.67857	2.33647	0.403016	2.02989	1.55124	2.56942	2.52292	1.94075	1.261	1.24096	0.454041	1.01831	1.43818	0.537625
ENSG00000173276	1.53278	1.86829	2.13259	1.52722	1.188	1.83101	1.06987	1.6176	1.80097	2.05903	1.44194	0.527089	2.08026	0.507566	1.83038	1.54622	1.40583	1.94587	2.1832	2.91091	1.68672	1.28404	1.71493	1.40987	2.05561	1.45535	1.42524	2.26978	3.05237	1.68271	2.37912	1.15944	1.82545	2.05014	1.5494	1.04578	1.88073	0.681396	1.76909	1.00257	2.01458	1.79375	2.36476	2.1321	2.07757	2.05117	1.5962	1.94666	1.91101
ENSG00000163376	0.25595	0.643867	0.457808	0.984998	0.626705	0.412367	0.436602	0.310632	0.595378	0.65323	0.556066	0.289019	0.535918	0.318488	0.717329	0.6692	1.38009	1.06642	0.414684	0.521857	0.626165	0.544071	0.439208	0.239049	0.967282	0.736742	0.383231	0.842893	0.735486	0.925198	1.25449	0.723113	0.841975	1.13155	0.537294	0.527811	1.01918	0.230107	1.16045	0.315794	0.973968	1.00132	0.619232	1.02569	0.470993	0.789276	0.607895	0.822074	0.379257
ENSG00000112200	1.05946	1.26162	1.93188	1.30675	1.61273	1.27067	1.55867	1.89569	1.48605	1.31799	1.42623	1.01536	1.44802	0.73953	1.61999	2.05455	1.65642	1.4458	1.51167	2.27642	2.07486	1.46115	1.69835	1.10018	1.75245	1.44597	1.26058	1.60949	1.96224	1.58197	1.8117	1.34742	1.3728	1.86998	1.64062	1.1689	1.9672	0.784639	1.61089	1.4313	2.27188	1.57708	2.17985	1.4507	1.23055	1.49534	1.77067	1.4862	1.753
ENSG00000267206	0.114437	0.0750813	0.0613996	0.172675	0.0438494	0	0.0299292	0.0944896	0.115082	0.0248148	0	0.163726	0.186548	0	0.0294491	0.00895677	0	0.0389457	0.0140309	0.0112387	0.0303581	0.119076	0.0143923	0.0441641	0.270243	0.314578	0.131255	0.00926656	0.0331903	0.0326933	0.0205617	0.476823	0.412974	0	0	0.0539431	0	0	0	0.12349	0.0663178	0.0106764	0.134138	0.360106	0	0.0597729	0.070068	0.104582	0
ENSG00000108590	1.69391	2.17039	2.2191	1.8849	2.00046	1.99294	2.72899	2.0597	2.43961	2.06202	2.67217	1.86079	1.5734	1.79353	1.97001	1.96979	2.47977	1.69521	2.65275	2.06845	2.98674	1.95282	2.08327	1.6795	2.09172	2.16067	2.08906	1.97858	1.68005	2.32017	2.3298	1.89445	2.4045	2.05788	2.20442	2.73865	1.54586	1.46942	2.26507	2.05071	2.02308	2.10471	1.82018	2.05176	1.76686	1.92846	1.67859	1.57037	1.79382
ENSG00000101236	1.66422	1.48722	3.74028	2.59842	1.32693	2.08581	1.82331	2.54533	2.51085	1.36007	2.80556	2.03128	3.01553	1.25203	1.88801	1.73573	1.7425	1.88415	2.14244	1.64031	1.87902	2.02994	1.28796	2.74597	2.56625	1.6792	3.32934	1.76015	1.97677	2.14952	1.73902	2.21444	2.71204	2.70966	2.26358	1.80966	2.58517	1.0525	1.52854	1.62792	2.37055	2.08972	2.4972	2.08259	1.51973	2.20974	1.97761	2.30104	3.12276
ENSG00000099385	3.78151	2.87442	3.98427	3.9009	3.35113	2.98753	3.16479	3.518	3.81138	2.78071	2.88324	5.76877	3.37665	6.32264	2.99277	3.44844	2.87771	2.83082	3.53526	2.54065	3.38528	4.52463	3.3544	3.60931	3.0278	2.89679	4.14276	2.29243	2.71749	2.90441	4.35207	3.23404	3.33497	3.13862	2.80978	3.99595	3.3457	5.51165	2.7441	5.32292	2.99733	3.13544	3.20874	3.20226	2.75692	3.37317	3.11109	2.5995	2.637
ENSG00000113360	2.57121	3.10089	3.31779	2.48016	4.05086	3.06552	3.63779	3.67787	2.80642	2.26953	2.46495	2.4844	2.91454	2.66117	3.06828	3.92217	2.93575	3.5454	2.70341	3.78764	3.06958	3.485	2.7431	3.42389	3.02429	3.61658	3.65995	2.98163	3.24686	3.19945	3.24858	2.87222	2.60242	3.21535	2.80465	2.62581	2.4767	1.69225	2.70071	3.44042	4.03235	3.74513	3.27784	4.18953	2.29748	3.53749	3.46508	3.51143	3.79414
ENSG00000161904	3.22358	2.66101	2.82091	2.69781	3.63078	3.20592	3.37722	3.62426	3.67072	2.64934	3.57228	3.17083	3.25113	3.4568	3.09561	3.59282	3.06898	2.75794	3.37751	3.39331	3.46055	3.72692	3.66072	3.35872	2.93932	3.10059	3.8501	2.74176	3.18179	2.81716	3.04158	2.60233	3.26313	3.012	3.6208	3.14717	2.91419	3.60222	2.94986	4.27895	3.73984	3.34983	2.7518	3.26038	2.68199	2.9319	3.49602	2.59983	3.8827
ENSG00000186265	0.0268257	0.144381	0.125568	0.991751	0.0851608	0.139764	0.106014	0.121592	0.448877	0.0281749	0.16924	0.106349	0.368489	0.0590712	0.135478	0.060013	0.191431	0.185052	0.257641	0.295816	0.323545	0.0822693	0.149791	0.0599134	1.10264	0.385473	0.105394	0.208251	0.172464	0.248035	1.02699	0.555679	0.561583	0.324008	0.0317245	0.104426	0.165802	0	0.102306	0.0493931	0.508364	0.191371	0.191275	0.0746185	0.115504	0.145075	0.16438	0.674766	0.0596469
ENSG00000231738	0	0	0.0803193	0.0150184	0.0182059	0.00736001	0.0123913	0.01712	0.00819288	0	0	0.0282598	0.277057	0.0460321	0.00610856	0.0183687	0.0108572	0	0.0287221	0	0.00629866	0.695634	0	0.012251	0.0152076	0	0.0140675	0.00382045	0	0.00678754	0	0	0.0707284	0	0.00964411	0.00751974	0	0	0	0	0	0	0.00577303	0.0294018	0	0	0	0	0
ENSG00000170325	1.06646	1.30478	2.02921	1.07699	1.61557	1.68417	1.70964	1.64699	1.27199	1.88075	1.06467	0.335942	1.59227	0.270881	1.47312	1.62108	1.53611	1.72148	1.50322	2.12465	1.25328	0.88427	1.04132	1.36437	1.50873	1.65818	1.33302	1.75502	1.89372	1.23206	1.87409	1.17636	1.68676	1.66233	1.32728	1.44726	1.28321	0.0598763	1.51126	0.506961	2.01763	1.76504	1.11224	1.56097	1.32408	1.49795	1.58855	1.8974	1.90675
ENSG00000156467	4.35716	3.92711	3.61203	4.59493	4.10727	3.55179	3.9409	3.18821	4.04445	3.83067	4.24004	5.34624	3.34927	5.51561	3.47482	3.01257	4.21601	3.50901	4.51261	2.79082	2.79126	3.87374	4.17097	4.09536	3.24106	3.97824	4.35817	3.16382	3.18619	3.68303	3.50995	3.87676	4.11987	3.80629	3.30754	4.13527	2.51475	5.8874	3.77238	4.7347	3.67948	3.34207	4.13016	3.57946	3.74214	3.56651	3.13495	3.01766	3.1556
ENSG00000165716	0.615842	0.371118	2.26473	2.07353	1.01665	1.21011	0.249696	1.04545	1.15167	1.16371	0.754889	0.911946	2.15321	1.37398	0.775285	0.296807	0.309936	0.838476	1.31528	0.749019	0.631	0.772912	0.425249	2.0531	1.12211	0.583958	2.25094	0.422773	0.325602	0.520634	0.593259	1.46542	2.18633	1.73505	0.738775	0.883428	0.414708	0.996492	0.856388	1.08883	1.56171	0.477674	2.91378	1.07682	0.27826	0.634363	0.947215	0.31508	0.746841
ENSG00000204308	4.33114	4.44024	3.70445	4.88283	4.61481	4.20157	4.60389	5.31075	5.08664	3.95145	4.53136	4.62644	4.89958	3.53211	4.17185	4.96541	3.97949	3.94684	5.10436	4.88329	4.92696	5.45246	4.8364	4.33998	5.01302	4.32781	4.80189	3.69428	4.17948	5.17239	5.69543	5.04444	4.07945	4.16729	4.24633	4.41746	4.08982	4.31971	4.24361	4.57453	5.13549	4.25016	4.68179	4.38515	4.02322	3.92463	4.52153	4.17269	5.27198
ENSG00000169856	0	0	0.0431671	0.0626911	0.00646536	0	0.0326387	0.0828497	0	0.0108873	0.0137289	0	0.0389918	0	0.13033	0.00391757	0.0115173	0.0998786	0.089507	0.0767421	0.00668224	0	0	0.166271	0.0161307	0.0268331	0.00748016	0.0201537	0.152864	0.00720082	0.315486	0.0413956	0.0163885	0.0203754	0	0.0159111	0.0167743	0	0.00677124	0.0318143	0.17424	0.00932746	0.151355	0.111165	0	0.23323	0.0104118	0.00525249	0.057323
ENSG00000183206	0.00351154	0	0	0	0	0	0.00356657	0	0	0	0	0.0081659	0	0	0	0	0	0.0154548	0	0	0	0	0	0	0	0	0	0	0	0	0	0	0	0	0	0	0	0	0	0	0	0	0.0066243	0	0	0.00718835	0.00564089	0	0
ENSG00000173093	0.131339	0	0.00962356	0	0.0338679	0.156782	0	0	0.0152865	0.00960044	0.0711667	0.0779253	0	0	0.0339469	0.00689884	0.0402028	0.0595236	0.0108115	0	0.0234227	0	0.0220959	0.0114604	0.0422673	0.107312	0.0519355	0	0.0128637	0	0.0470429	0.387233	0.00965252	0.0179741	0.070638	0.0279315	0.0196934	0.0153745	0	0	0.136938	0.00822447	0.182683	0.0184015	0.0135073	0.0232973	0.0183039	0.00924638	0.0128284
ENSG00000132964	2.42055	2.4169	3.15035	2.59846	2.65605	2.42174	2.75737	2.86129	1.98513	2.56586	2.47977	1.1592	2.00395	2.9238	2.43542	3.16676	2.72806	2.22359	1.81993	2.66943	2.11411	2.72703	2.91007	2.75285	2.35361	2.16779	2.74824	2.74761	2.41834	2.81637	2.8217	2.05509	2.80317	2.44005	2.54024	2.83276	2.36541	2.11104	3.0961	1.60605	2.3556	2.17923	2.85978	2.10844	2.48961	2.71531	3.35911	2.47725	3.05786
ENSG00000183570	0.198303	0.100755	0.650254	0.798041	0.168764	0.106346	0.158486	0.370514	1.24054	0.32915	0.344336	0.847064	0.660666	0.175445	0.217188	0.275065	0.0258473	0.075727	0.442012	0.0836364	0.233135	0.0598595	0.202344	0.264872	0.682978	0.186007	0.390333	0.160138	0.388898	0.179643	0.294161	0.462056	0.53269	0.570661	0.106002	0.0356409	0.355193	1.21372	0.0926355	0.298005	0.526151	0.104303	0.624927	0.350606	0.0843025	0.196356	0.218298	0.188842	1.47795
ENSG00000101680	0.0662537	0.389823	1.11559	1.30794	1.81958	1.35904	1.90116	0.00589785	0.499106	1.25258	1.3455	0.133211	0.395045	0.768678	1.0903	1.09432	0.281912	0.0520093	0.245221	0.139963	0.462968	0.0642784	1.16365	1.67078	0.845092	0.368982	0.466823	0.315357	3.76462	0.190036	0.0282345	0.364828	0.0625895	0.851097	0.306256	0.090257	0.513399	0.418052	0.307264	0.0888872	0.431619	2.97708	1.26511	1.05972	0.355667	0.0319609	2.68535	0.196582	3.71143
ENSG00000177257	4.59371	4.98022	0	0	0	0.0880483	0	1.33214	0	0.0620132	0	0	0.0888716	0	5.21646	0.0447889	0	4.91584	5.72	0.109955	0	0.149141	0	0.0737719	0	0	0.380074	0.407368	0	0	0	0	0.482791	0	0.868107	0.536156	1.26387	0.0982557	0.218676	0.175406	0	0	0	0	0.694914	0	0.32421	0	0
ENSG00000187325	2.16765	2.27006	3.36696	3.00815	2.84714	3.00123	3.17467	3.51485	2.84831	2.73741	2.36773	2.46756	3.15963	1.35057	3.45191	4.15352	2.43896	2.35617	2.55428	3.54806	3.00454	4.05968	2.85555	2.24437	2.9822	3.00789	3.033	2.66808	3.27656	2.74592	4.45886	3.26498	3.60813	2.57388	2.49405	3.17736	3.00607	1.09207	2.30237	2.97995	4.71975	2.85793	2.52445	2.77951	1.74333	2.91119	3.13146	1.89801	3.29781
ENSG00000173846	3.3183	2.96215	1.749	2.55833	2.58623	2.55937	3.87514	2.60598	3.51919	2.92707	3.75507	2.17967	2.04993	2.06963	2.71263	3.09641	3.07299	3.86313	2.86963	3.34425	3.68339	2.21661	3.85665	1.704	3.52533	2.81247	2.19295	3.11994	2.97028	2.49576	2.35023	2.41267	2.98007	2.86556	3.61426	3.34065	2.75132	2.39803	3.22025	3.81848	2.11053	3.076	2.06927	4.92509	3.21212	3.03469	3.44081	2.88548	2.98225
ENSG00000149927	0.404826	0.0100454	0.534175	0.417848	0.0231076	0.6558	0.011818	0.145664	0.387062	0.251705	0.0646467	0.0180287	0.519357	0.338566	0.0154824	0.0163591	0.00691136	0.277808	0.0754469	0.0349897	0.0317505	0.196981	0.0410323	0.038585	0.0145047	0.0373745	0.189224	0.0121084	0.0261113	0.00862417	0.0635859	0.0187481	0.190876	0.0601969	0.0602376	0.0609981	0.0626415	0.0104684	0.117107	0.0473944	0.383567	0.0305106	0.509052	0.0433996	0	0.100208	0.171009	0.00314921	0.529265
ENSG00000168303	2.32831	1.63053	2.26278	1.95581	2.1281	1.96415	2.29253	1.55875	1.68472	2.13068	2.5079	1.93517	2.2979	2.18385	1.79709	1.67102	1.96997	2.34398	1.95586	1.81144	1.88632	2.638	2.27033	2.03746	1.81352	2.5733	2.32977	1.88568	2.13176	2.10219	2.47664	1.65881	2.30358	2.16625	2.45248	2.34995	2.24679	1.60331	2.2717	2.54642	2.6472	2.40655	2.43815	2.3187	2.29145	2.55983	2.27292	1.40799	1.63758
ENSG00000204022	0.0110116	0.00950583	0.0276764	0.0269856	0.0218718	0.0393986	0.00560267	0.0307442	0.0293488	0.0138712	0.0174869	0.0752423	0.00670548	0	0.00551206	0.00665563	0	0.00973728	0.00522487	0.0166579	0.0337708	0	0	0.059791	0.0205415	0.0228469	0	0.00688603	0.00621888	0.00612489	0.0379373	0.0309102	0.0368948	0.0259366	0.0259543	0.00678577	0.0190021	0	0.00575937	0.0136111	0	0.00793465	0	0.00890492	0.0195043	0	0.0176611	0.00892066	0
ENSG00000111785	0.770134	0.904343	1.76564	1.28497	1.09328	0.789979	1.4908	1.64381	1.23204	1.33926	1.10587	0.622046	1.30261	0.443219	1.73567	1.54886	1.13976	1.1806	1.26521	1.27904	1.12945	1.35272	1.01008	1.36352	1.28752	1.1491	1.2626	0.96075	1.05939	1.37657	1.59373	1.33261	1.44213	1.4141	0.785822	1.10633	1.17089	0.469081	0.89148	0.653202	1.74894	1.0146	1.80495	1.13596	0.528836	0.801966	1.07655	0.995962	1.05558
ENSG00000124900	0	0	0	0	0	0	0	0	0	0	0	0	0	0	0	0	0	0	0	0	0	0	0	0	0	0	0	0	0	0	0	0	0	0	0	0	0	0	0	0	0	0	0.0128412	0	0	0	0	0	0
ENSG00000126562	0.971757	0.125876	0.0408546	0.0709374	0.319678	0.418628	0.128922	1.27962	0.323578	0.239421	0.105615	0.695343	0.211031	0.251993	0.0530639	0.0751701	0.233701	0.104767	0.166936	0.062005	0.0201272	0.0304283	0.0236936	0.0147383	0.065964	0.0601969	0.135295	0.0689537	0.276678	0.240867	0.0271061	0.0583733	1.37151	0.0607969	0.0756549	0.223788	0.0419327	0.282265	0.0847513	0.0998885	0.178973	0.0589538	0.13298	0.0469154	0.0458555	0.339695	0.0466692	0.0661364	0.320948
ENSG00000113441	1.58707	1.94191	2.51057	2.36804	2.33323	2.66424	2.80525	2.47822	2.38734	2.26869	1.98812	1.19965	2.23281	1.12329	2.09806	2.03404	2.47723	2.03788	2.31851	2.53177	1.53617	1.7511	2.47294	2.51205	2.52773	2.40399	1.89542	2.96064	2.48936	2.44712	3.13289	2.9607	2.38986	2.80389	1.4366	1.6022	2.85088	1.25805	2.35027	1.26651	2.76612	2.07726	2.19037	1.96813	2.48638	1.97876	2.65807	2.65455	2.24607
ENSG00000179165	0.0118231	0.0102068	0.0297036	0	0.0350742	0.0142287	0.0120079	0.0545773	0.0623214	0	0.0495276	0.02739	0.0841209	0.0446237	0	0.00714695	0.0209659	0.0311412	0.0223133	0.0267421	0.0481189	0	0.0341947	0	0.0147375	0.0326061	0.0405169	0.0147509	0.0396122	0.077013	0.0164203	0.101785	0.00999932	0.0730721	0.0908368	0.0712617	0.0203985	0	0.0606851	0.0575855	0.104369	0.0169902	0.022247	0.0378725	0.041575	0	0.0189595	0.00957864	0.0524359
ENSG00000082515	2.25328	2.37136	1.97171	2.02426	2.3006	1.50418	3.41014	2.09155	2.34017	2.34507	1.99562	3.08394	1.57846	2.21602	1.58221	1.69424	2.3673	1.66124	2.35096	1.72193	2.43966	3.00041	2.67692	1.87401	2.0708	2.06792	2.38028	1.98828	1.47644	2.7509	2.81613	2.01437	2.24694	1.76844	1.64506	2.71834	1.92533	1.82059	1.95798	1.96086	2.04231	1.58535	2.42805	2.35009	2.07117	1.96696	2.73202	2.11614	1.34521
ENSG00000130287	0.00361972	0.00312366	0.0772967	0.00890374	0	0.00435872	0.0219194	0.0467797	0.0288733	0	0.00767088	0.0497812	0.0814004	0.0498599	0.00361695	0.00436794	0	0.0441652	0.248482	0.0109452	0.00372961	0.0372872	0	0.00363471	0.00451512	0.0100325	0.0248735	0.0022614	0.00815068	0.055277	0.0689092	0	0.0182634	0.0394987	0.00571324	0.00889312	0.0031324	0.00488057	0.00377934	0	0.0245721	0.0232899	0.105552	0.00584566	0.00428593	0.0147812	0	0.00293097	0.0121753
ENSG00000135905	0.429169	0.901784	1.07701	1.73532	0.501518	0.997821	0.597139	0.454379	1.27452	0.816979	0.944764	0.205844	1.31109	0.0756866	0.849629	0.685581	1.24446	0.624607	0.905359	1.73906	1.33529	0.139209	0.697275	0.52684	2.32255	1.91608	0.557853	1.51403	1.1037	1.19431	2.35289	1.33371	1.13259	1.8433	0.835881	1.01341	1.75026	0.0916048	0.678742	0.372737	1.48682	0.733255	1.31307	0.848512	0.725557	0.506841	1.36886	1.86231	0.395678
ENSG00000011677	0.0353733	0.783267	2.52045	0.456395	1.36941	2.0649	0	1.58513	0.605536	0.531213	0	0.322544	1.504	1.6202	0.692372	2.73445	0.287807	1.40154	0.822066	0.537526	0.620217	0.427537	0.325645	2.87317	0.319356	0.469859	1.33219	0.668122	0.258135	0.558974	0.257809	0.0427405	2.82173	1.41774	0.99511	0.32132	1.71216	1.2768	1.76076	1.49152	2.76935	0.742428	1.93223	0.349516	1.28426	0.466317	0.355379	0.372633	0.528028
ENSG00000117682	2.92177	3.12145	2.43819	2.66698	3.7194	2.5364	2.93239	3.04645	3.0039	3.03053	2.62308	2.67983	2.53666	2.4293	2.84571	3.27142	1.89902	2.97364	3.59203	3.65352	2.87266	2.93279	2.75346	2.57267	3.16721	3.16219	2.4732	3.00546	3.13321	2.68146	2.94096	2.58837	3.14601	2.82907	3.22993	2.78133	3.04992	3.02756	2.8135	3.03128	2.64131	2.15509	2.00741	2.95853	3.01268	2.29123	3.16239	2.9561	2.33941
ENSG00000154493	0.0047544	0.0284793	0.00400739	0.0631435	0.00473958	0.0171061	0.00482887	0.00445564	0.0867549	0	0.025047	0.0544217	0.0623375	0	0.00948591	0	0.00844695	0.0208944	0.0134675	0.00720028	0.0194957	0.0098927	0.00461952	0.188039	0.0059299	0.00659917	0.027214	0.00297072	0.00536012	0.0105389	0.0131885	0.0228928	0.0513994	0.0297583	0	0.00584889	0.0683994	0.0064096	0	0.0058798	0.315596	0.00342382	0.247334	0.0229073	0.00562904	0.00972819	0	0.00385003	0.0317792
ENSG00000174197	1.40333	1.31799	2.47434	1.51964	1.56671	2.16465	1.41031	1.92056	1.1889	1.94923	1.29492	0.671614	2.03355	0.642934	1.77176	1.99846	1.50012	2.19715	1.00575	3.00648	1.06321	2.15037	1.3142	1.7776	1.81301	1.80871	1.51519	1.99299	2.34586	2.27487	2.80396	1.66368	2.07934	2.14871	1.43281	1.24138	2.03568	0.777804	1.56606	1.08475	2.59213	2.15996	1.8573	1.60529	0.891774	1.65502	1.88009	2.0763	2.12821
ENSG00000175643	3.35546	1.91054	3.89226	2.94827	2.199	2.88243	3.65137	3.65153	1.86562	2.97188	1.10087	3.57529	3.82293	3.8318	2.18547	2.17114	2.49822	3.47156	1.81977	4.14602	2.26057	4.5961	4.07618	2.55308	2.69088	2.30526	2.5401	1.92571	3.19104	3.62113	4.20184	2.61453	3.5103	2.5868	2.73559	2.9512	2.67706	2.12187	2.57262	3.14051	3.5138	2.1092	3.46178	2.27514	1.17312	2.20376	3.02945	2.53701	2.43825
ENSG00000100626	0.0115375	0.0910165	0.0926219	0.311962	0.0477026	0.107511	0.0233412	0.175571	0.104845	0.0327339	0.133728	0.191731	0.0525606	0	0.0500511	0.0372654	0.00821926	0.0323975	0.0453564	0.173495	0.399828	0.0475011	0.0267613	0.0161933	0.756405	0.236866	0.180655	0.053953	0.0412054	0.0229722	0.31439	1.30185	0.285132	0.0145536	0.0748694	0.0722887	0.122902	0.0701442	0.0358369	0.0199256	0.968755	0.0620169	0.201777	0.18264	0.00274118	0.0282139	0.0476219	0.137633	0.0410934
ENSG00000206260	0	0	0.0260899	0	0	0	0	0	0.0413046	0	0	0	0.0375022	0	0	0	0	0.298303	0	0	0	0	0	0	0	0	0	0	0	0	0.202414	0	0	0	0	0	0	0	0	0	0	0.0442907	0.316586	0	0.0365352	0	0	0	0
ENSG00000066777	2.53858	3.05106	4.22849	3.09557	3.07513	3.65413	2.4189	3.81566	2.91988	3.45279	2.59741	1.39392	3.92627	2.24325	3.2652	3.94633	2.77571	3.81807	3.18069	3.16614	2.98129	2.35058	3.20418	3.35159	2.88029	3.36101	3.07753	3.59547	3.75292	2.75364	3.08309	2.62151	3.71905	3.70102	3.19687	2.46939	2.40265	1.66802	3.16878	1.66695	3.91678	3.30088	3.20794	3.09322	3.05406	3.21074	3.24683	3.13343	3.91044
ENSG00000136631	2.54102	2.42081	2.60724	2.31212	2.88396	2.42604	2.43608	3.263	2.56078	2.47374	2.16921	1.89138	2.06467	2.20354	1.76429	2.45251	2.3449	2.67726	2.58506	2.91287	2.73801	3.32137	2.31397	2.7684	2.33259	2.42199	2.38459	2.41264	2.71304	2.7363	2.70528	2.31932	2.27563	2.48537	1.9261	2.37946	2.20986	2.26869	2.6243	2.30286	2.87065	2.24386	3.58293	2.17884	2.04263	2.63775	2.55816	2.19786	2.24051
ENSG00000196338	0.203582	0.0735525	0.747327	0.550087	0.261306	0.222675	0.0620947	0.128722	0.492123	0.293584	0.1979	0.0288116	0.269469	0.136431	0.0907203	0.10188	0.0757666	0.0541862	0.254284	0.126822	0.129212	0.183187	0.035965	0.114518	0.203241	0.194514	0.232484	0.126885	0.0953968	0.344028	0.232265	0.278951	0.303611	0.235976	0.0293021	0.0379371	0.182532	0.113398	0.0762247	0.174498	0.573906	0.0702097	0.747358	0.162173	0.0508816	0.098962	0.059031	0.0399003	0.342343
ENSG00000115221	5.57647	4.18276	4.61171	1.66843	6.06075	5.47878	1.96516	3.30718	4.72074	5.09974	4.91952	3.19547	2.78103	2.3109	3.35698	7.07117	5.9759	3.44571	3.13783	3.67667	6.41807	3.40847	4.12125	5.09665	4.54022	6.03034	4.12929	4.02406	4.37876	6.59209	3.12756	4.05251	1.78341	3.3097	4.66303	3.07695	4.89237	1.53387	3.32078	5.07262	3.5875	4.91558	2.17454	4.59624	2.28151	3.11848	6.10974	4.71246	5.8367
ENSG00000184979	3.39346	4.61559	3.18176	2.39413	3.74532	1.84824	2.3819	1.8402	2.3591	4.04796	0.951364	0.423951	3.11421	1.10491	3.23795	1.54726	4.1747	2.73874	1.71209	3.08997	3.50481	1.35754	2.09936	1.95905	4.14925	3.21292	2.15379	3.50509	2.22215	4.44342	3.04305	1.92716	2.46941	3.79558	2.7136	1.06554	3.88713	0.164652	3.81603	1.2937	3.81401	3.12011	2.9349	2.40404	0.91667	2.13426	3.88293	4.59166	1.49269
ENSG00000164404	0.0450807	0.045374	0.123211	0.0733349	0.130833	0.114812	0.104637	0.200023	0.218078	0.0127748	0.138866	0	0.207141	0.038334	0.103001	0.110786	0.0663362	0.0787611	0.070529	0.105913	0.120638	0.107272	0.0652393	0.0963388	0.0375976	0.0824029	0.363862	0.0743067	0.0672575	0.152671	0.207313	0.314427	0.129476	0.49483	0.035719	0.0462148	0.00658838	0.0102585	0.207474	0.0372834	0.239848	0.0163874	0.104239	0.0838592	0.0619237	0.0309522	0.318028	0.0245043	0.0670763
ENSG00000111684	1.57472	2.33574	2.57732	3.55986	3.24204	3.2737	2.26629	3.04892	1.85966	2.42242	1.85042	0.227765	2.94424	0.302855	2.76547	2.23539	1.92417	3.58773	2.709	2.79439	2.28162	1.90877	2.83348	4.41734	2.55432	2.46005	2.31781	2.60029	3.90617	1.63781	3.05003	2.23268	2.75615	3.50232	2.1983	1.4153	2.58641	0.230602	2.14006	0.224106	3.08491	3.90131	3.23149	2.854	1.77474	2.54372	2.68605	2.61088	2.55373
ENSG00000171243	0.0691525	1.82696	3.56994	3.19378	5.43434	1.32414	0.03051	1.84651	4.99816	0.227738	0.680653	0.113286	3.14806	0.332106	3.55221	0.0242244	1.29128	3.90921	5.96766	0.495005	0.406253	2.03551	0.15815	3.68888	0.505995	0.159508	3.92243	0.0188339	2.16866	0.0223034	0.655972	0.0794927	2.38436	2.39879	0.314687	1.10885	0	0.946542	0.0721308	0.0612788	5.15468	0.228559	3.8109	2.06151	0.756596	0.560171	1.15645	1.29826	3.99668
ENSG00000267041	0.0377572	0.0592786	0.0682079	0.392991	0.488638	0.252938	0.0414915	0.543611	0.188133	0.0370391	0.357682	0.161409	1.59364	0.0241375	0.116239	0.177206	0.0169141	0.368511	0.330458	0.619083	0.0860723	0.398154	0.0487259	0.390277	0.294066	0.151193	0.0612113	0.0527726	0.412952	0.228706	0.612306	0.260729	0.193849	0.282439	0.214813	0.221428	0.181209	0.237373	0.0996674	0.367135	0.79523	0.995745	0.240652	0.560706	0.0150239	0.27843	0.136801	0.0705097	0.200498
ENSG00000111530	3.20641	3.45891	3.97756	3.19799	3.47404	2.12687	3.41922	3.97576	6.43734	3.48162	3.05318	2.27166	3.82646	2.05557	3.36909	3.94631	3.72207	3.83124	3.62222	4.19115	3.71177	3.00689	3.79985	3.91835	3.52727	3.39755	3.9932	3.72484	4.03012	4.00059	3.65405	2.91929	3.99462	4.09737	3.1951	3.53776	3.86871	2.26582	3.30747	2.40984	4.16243	5.84896	3.74923	3.57238	2.97599	3.5832	3.92959	3.65712	3.85936
ENSG00000120457	0.024372	0.349809	0.17225	0.495024	0.247102	0.281507	0.296121	0.465182	1.71418	0.725982	0.525956	0.0834158	0.605408	0.157853	0.785352	1.68054	0.324883	0.0533154	0.17515	0.161381	0.542431	0.033758	1.8651	0.0604193	0.528944	2.20801	0.42652	0.34024	0.518292	0.134558	0.65327	0.537787	0.33799	1.48169	0.0756284	0.148386	0.852658	0.0858102	0.625335	0.357314	0.129408	0.236115	0.0863305	1.01021	0.0335676	0.0413834	0.680359	0.099306	1.61181
ENSG00000187486	0.183137	0.0850519	0.448872	0.623246	0.0978294	0.0643956	0.0236057	0.337779	0.301414	0.0704756	1.18242	1.09419	0.452801	0.47788	0.440472	0.11328	0.0545353	0.39072	0.160831	0.66233	0.41653	1.04321	0.457826	0.127527	0.629642	1.26672	1.10389	0.212751	0.456708	0.261127	1.97438	3.60331	1.45598	0.451497	0.217203	0.671741	0.373076	0.879585	0.40912	0.164228	1.55757	0.602459	1.09416	0.697109	0.165849	0.450167	0.165876	0.189349	0.462019
ENSG00000100122	0.066568	0.148805	0.213093	0.764025	0.108971	0.250468	0.153046	0.141761	0.396886	0.338732	0.360578	0.371067	0.406445	0.163735	0.170989	0.155745	0.447871	0.239851	0.200476	0.131505	0.50762	0.21916	0.186047	0.231269	0.632212	0.501197	0.388177	0.198419	0.122673	0.23243	1.02086	0.543627	0.577497	0.844034	0	0.0814972	0.494241	0.0600005	0.11394	0.256702	0.364041	0.267771	0.37547	0.384363	0.152967	0.090213	0	0.106289	0.277881
ENSG00000092529	0.341851	0.0896108	0.129455	0.0196696	0.458284	0.226474	0.320711	0.265239	0.457901	0.108417	0.264194	0.0610837	0.206077	0.00680165	0.0932818	0.0601623	0.118868	0.100592	0.263604	0.214651	0.284647	0.397669	0.0858841	0.0785216	0.15213	0.595151	0.392623	0.118762	0.0120327	0.285206	0.264798	3.61924	0.142191	0.189895	0.64442	0.236635	0.11147	0	1.23705	0.23779	0.23604	0.227837	0.162497	0.623095	0.0313821	0.391858	0.390049	0.0677775	0.222859
ENSG00000112818	0.0083735	0.0706964	0.0555298	0.156728	0.0971163	0.0200893	0.313133	0	0.0443621	0.0140503	0.0695813	0.166103	0.0794701	0	0.0413584	0.139963	0.233933	0.0293896	0.0849371	0.12782	0.0840355	0.0849726	0.102352	0	0.213861	0.144179	0.0382448	0.031126	0.0281331	0.0458938	0.236509	0.0727367	0.0556943	0.174573	0.126897	0.0306766	0.0777906	0	0.026069	0	0.0926657	0.0358205	0.121601	0.0792199	0.0392444	0	0.43892	0.0857767	0.00941287
ENSG00000113492	0	0.00545331	0	0.00778141	0	0	0	0	0	0	0.00670359	0.0292013	0	0	0.00631368	0	0	0.0166944	0	0	0.00651016	0.0131396	0	0.00634465	0.0542749	0	0.0502565	0.00788692	0	0	0	0	0	0	0	0.00777213	0.00546854	0	0	0	0.00719874	0	0.0295908	0	0	0	0.010144	0	0
ENSG00000056972	4.23806	3.85118	2.44154	2.61447	3.64933	2.82378	4.12707	3.37384	3.35729	4.89848	3.60865	3.28069	3.39092	3.03535	3.49079	2.79188	3.79191	3.88499	3.57901	3.10758	3.76654	2.33472	4.50569	2.57401	3.60962	3.30274	2.58999	3.96217	3.98616	3.96798	2.62868	3.37579	2.59098	3.0192	3.6446	3.4664	3.51101	3.2142	3.48922	3.2787	3.1671	4.26749	3.35939	3.81323	3.23246	4.19995	3.83259	3.68276	3.92393
ENSG00000143157	2.45318	2.66319	3.97494	3.23879	2.98561	3.07584	2.78659	3.96472	2.84886	2.70716	2.38471	1.39028	3.69912	2.16698	2.77816	3.16359	3.19595	3.56454	2.80599	3.23386	2.55294	3.14771	2.39267	4.01017	2.98738	3.11865	3.1963	3.09671	3.41881	4.05051	3.47134	2.3223	3.09844	3.80899	2.68609	2.88916	3.52239	1.93028	2.60436	2.27908	4.04935	3.42908	6.29174	2.63385	2.34843	3.78907	2.90804	3.05088	3.44426
ENSG00000181371	0	0	0	0	0	0	0	0	0	0	0	0.332273	0	0	0	0	0	0	0	0	0.0272897	0	0	0	0	0	0	0	0	0	0	0	0	0	0	0	0	0	0	0	0	0	0	0	0	0	0	0	0
ENSG00000275778	0.030607	0.0264462	0.0258342	0.0189328	0.174086	0.0185102	0.0764845	0.111525	0.119383	0.124491	0.07981	0	0.143132	0.019549	0	0.0459333	0.0802693	0.0926572	0.0853171	0.0232554	0.0470363	0.0630812	0.0149498	0.0307325	0.0380907	0.1036	0.0865752	0.028688	0	0.0671222	0.0213564	0.108253	0.0513658	0.0242092	0	0.0189103	0	0	0.0319436	0.0190098	0	0.0220963	0.290079	0.0247835	0	0	0.0488908	0.0248271	0.0512579
ENSG00000173473	3.03554	3.43116	4.64105	4.10068	3.21987	3.85205	4.04526	3.98693	3.42258	3.26051	3.33741	2.53442	4.35209	2.86564	3.98232	4.45154	4.17905	4.19927	3.48249	3.9972	3.03989	4.57727	4.03044	4.41405	3.94505	3.92602	4.06239	4.67077	4.47518	4.51219	4.48051	3.83011	4.23741	4.33167	2.96653	3.31989	4.41207	2.18113	4.36026	3.0153	4.70231	4.19358	4.35231	3.55888	4.16642	4.6169	3.83157	4.50054	4.22261
ENSG00000142875	1.4459	2.0879	2.75052	3.17652	2.60889	2.77586	1.81601	1.91283	2.30775	2.50756	2.26432	1.13007	2.25325	0.744726	1.91208	2.59824	2.55097	0.867665	2.29518	3.02634	3.17067	0.426371	1.70546	2.07978	3.20983	2.73081	1.79667	1.70689	2.68726	1.81162	3.08757	2.56982	2.70639	3.32122	1.92481	0.669025	2.36837	0.306171	1.6369	1.37008	2.57776	2.14139	2.29888	2.5001	1.66048	1.01785	2.4895	2.42639	2.71735
ENSG00000016602	2.60111	0.761036	2.33862	1.31147	0.912975	2.93759	0.858134	3.90831	4.01663	0.85776	0.13941	0.447167	2.52941	0.123868	1.59524	0.0303493	4.79297	4.9269	1.10019	5.0727	3.14492	3.30673	0.128158	1.23527	0.556731	0.274628	0.158494	3.40001	6.56096	1.23417	3.20449	0.281423	4.73156	1.01201	0.415587	0.738863	1.41555	0.902179	1.10483	1.23329	2.45092	0.383245	1.17581	4.31893	3.38905	1.85596	2.74662	3.77719	0.301025
ENSG00000168172	1.30826	1.51244	3.18013	2.11531	1.10344	2.37943	1.86344	2.05633	1.90709	1.3989	1.77651	2.14071	2.33198	0.912991	2.00554	2.23458	1.97379	2.35929	1.76606	2.39466	1.42828	1.34952	3.08513	1.38747	1.58894	1.81874	1.46871	2.20956	2.37014	1.51766	2.10879	2.31437	2.33144	2.57157	2.06042	1.63151	2.74549	0.664107	1.33628	1.52471	1.89266	1.6403	2.15096	2.30655	2.08585	2.63532	1.82816	1.67716	2.14166
ENSG00000109606	4.07178	3.97965	4.12982	3.63914	4.32039	3.79557	4.5179	3.88005	3.9663	4.04909	3.83024	1.8692	3.57962	2.39047	3.60731	4.50425	4.18184	4.63131	4.22064	4.75175	4.48666	3.99961	3.70262	3.58638	4.35298	4.32686	3.3996	3.75901	4.47013	4.6323	3.7627	3.40428	4.09624	3.98891	4.58383	3.57243	3.76354	2.94642	3.55913	3.1608	4.1087	4.57556	3.77025	4.39922	3.80868	4.22185	4.65843	3.98353	3.74482
ENSG00000183066	0.0556067	0.0242522	0.0925141	0.115038	0.0476462	0.187276	0.0204197	0.201536	0.0996644	0.023634	0.0506616	0.24252	0.0673457	0.00514382	0.0160952	0.0784744	0.0355763	0.0766697	0.114244	0.0303675	0.0532482	0.53073	0.0388169	0.0400998	0.0349424	0.118713	0.179862	0.0642916	0.0226528	0.128974	0.392161	0.041899	0.155586	0.180036	0.00638201	0.00993283	0.0684248	0	0.0498671	0.0297507	0.0228923	0.0515351	0.169369	0.070253	0.0237822	0	0.0129612	0.0292057	0.0135969
ENSG00000234409	0.162733	0.091613	0.242381	0.401632	0.33309	0.160496	0.193242	0.126374	0.607957	0.101651	0.415787	0.410002	0.307558	0.22127	0.120052	0.143809	0	0.0543326	0.180972	0.103048	0.152963	0.267407	0	0.0615692	0.0761183	0.294135	0.233075	0.0946206	0.0520289	0.116879	0.294546	0.144303	0.209105	0.0486097	0.141268	0.146489	0.190148	0.0821171	0.09492	0.568978	0.543722	0.0768255	0.375449	0.337036	0.0366255	0.341408	0.188531	0.0251351	0.181771
ENSG00000215915	0.81843	0.164085	0.179318	0.355615	0.516587	0.178072	0.31979	0.809192	0.434101	0.22491	0.63739	1.40393	0.568323	0.975262	0.320181	1.39929	0.633235	0.633605	0.552772	0.555334	0.318747	0.358301	0.331782	0.0496961	0.537868	0.428024	0.0914447	0.925264	1.00614	0.384319	0.408947	0.401216	0.429343	0.0867522	1.03382	0.951762	0.342565	2.215	0.687442	0.392933	0.587056	0.22211	1.02723	0.181383	0.360849	0.450627	0.380264	0.212795	0.0418549
ENSG00000085999	1.38667	1.67356	2.07791	1.5573	1.75684	1.80108	2.5084	2.88588	2.0407	2.21583	0.769634	1.37013	2.25191	0.899873	1.66663	1.75531	1.63411	3.21739	2.29502	3.07107	1.24422	3.07933	2.10798	2.11425	1.64276	1.86107	2.79582	1.54541	2.1724	2.28346	2.72503	1.08762	2.58012	2.52947	2.49143	2.22918	1.89328	0.695289	1.83191	2.20831	2.83765	2.35191	2.3691	2.35114	0.965688	2.50085	2.52764	1.68747	2.56094
ENSG00000280148	0	0	0.0140279	0	0	0	0.0168915	0.015591	0	0	0	0	0	0	0	0	0	0	0	0	0	0	0	0	0	0	0	0	0	0	0	0	0	0	0	0	0	0	0	0	0	0	0.0312501	0	0	0	0	0	0
ENSG00000110172	1.48824	2.21221	2.10319	2.23665	2.05032	1.80092	1.9788	1.20149	1.56167	2.04371	2.1809	0.717766	1.54224	1.25956	3.06901	2.56714	2.23482	2.33895	2.79252	1.90885	2.01422	1.73463	1.42978	1.4786	1.86906	2.08183	1.69971	1.9591	2.32939	1.54333	1.05674	1.57532	2.72914	2.94422	4.83571	2.44569	1.71144	0.661705	2.65619	1.35442	2.81732	1.91511	2.14315	2.80554	1.32751	2.69952	2.64264	2.04754	2.2117
ENSG00000165646	0.0767882	0.258129	0.265416	0.314437	0.21846	0.272221	0.101125	0.201308	0.253086	0.064821	0.135095	0.0417816	0.127038	0.0229764	0.620916	0.311617	0.0529776	0.0833435	0.0945126	0.544904	0.277768	0.0250729	0.0577718	0.209437	1.14539	0.136572	0.101349	0.573785	0.649876	0.0464084	0.152044	0.49316	0.118097	0.369665	0.196767	0.201736	0.327331	0	0.254834	0.029715	0.247206	0.160984	0.187735	0.148924	0.11725	0.208077	0.266402	0.235138	0.142786
ENSG00000184014	1.61258	2.00283	3.9205	3.26463	2.06602	3.41334	3.20229	2.33051	2.44896	2.87013	2.78789	0.778052	2.64931	1.76416	2.23571	2.85098	2.85545	1.553	2.06155	2.44933	2.48294	1.17269	3.25042	3.21258	3.16774	2.85385	2.61277	2.47131	2.7156	2.56034	2.54966	3.19217	2.79221	3.01026	1.76214	2.05048	3.06384	0.510753	2.02887	1.62505	3.16713	2.90161	3.40607	2.60866	1.82933	1.99004	2.85588	3.05405	3.85302
ENSG00000113732	7.0624	6.82776	5.8053	6.72231	6.78827	6.24596	6.54489	5.76769	6.78525	6.20699	6.9312	7.08985	6.15982	6.34103	5.75668	5.98022	6.65915	5.85734	6.77519	5.52849	7.21725	6.70989	6.97352	6.82087	6.53901	6.33688	6.94025	6.10605	6.0543	6.19709	6.25844	6.3747	6.57687	6.94216	5.57115	6.04217	6.30752	6.37786	6.52648	6.31344	5.75872	5.88487	7.08542	5.85978	6.24597	5.81767	6.48496	6.40091	5.67476
ENSG00000138152	0.0710315	0.044188	0.188694	0.0749166	0.128865	0.373229	0.0920787	1.24577	0.195396	0.0515307	0.146786	0.324109	0.178253	0.571671	0.0709783	0.177003	0.0544686	0.131705	0.0292539	0.0234567	0.0731369	2.01282	0.180263	0.16745	0.0758409	0.070482	0.0587887	0.112416	0.397327	0.435412	0.150974	0.120797	0.342691	0.0642199	0.125786	1.10665	2.65158	0.232727	0.248777	0.203683	0.269527	0.142467	0.595094	0.0974936	0.216899	2.85226	0.143146	0.0332936	0.133945
ENSG00000102921	4.02303	4.25201	3.29598	2.921	4.37348	4.5116	3.7405	4.05252	4.18854	5.20451	3.71115	3.65322	3.38998	2.04165	4.45531	3.56722	4.04043	4.38552	3.94777	3.92563	3.99471	3.22192	4.22219	3.86293	4.04083	3.98031	2.83027	4.52519	3.82833	4.42711	3.30188	3.07042	3.98404	4.33178	4.35334	3.50061	4.25178	2.20625	4.24716	3.44474	4.03793	5.59571	2.54524	5.11702	3.91967	4.01174	4.87554	4.30575	3.97374
ENSG00000167311	0	0.0624723	0.938304	0.235056	0.0578374	0.135987	0.0732651	0.0677246	0.150639	0	0.585631	0.363696	0.12078	0.273644	0.244283	0.0265487	0	0.0639652	0.0550021	0.0332612	0.238406	0.174145	0.0701598	0.0294192	0.0720347	0.174058	0.500023	0.0183654	0.0165925	0	0.0405964	0.629249	1.65147	0.456708	0	0.05363	0.0503304	0.0965133	0.0456289	0.220312	0.174531	0.0928222	0.678555	0.047061	0	0.0594266	0.0235969	0.035501	0.112031
ENSG00000143178	0.899683	0.283924	0.707757	0.702282	0.507915	0.60533	0.540138	0.545051	1.09885	0.501645	0.901544	1.04512	0.478525	0.822667	0.273956	0.442346	0.55957	0.656229	0.860236	0.557986	0.461918	0.743455	0.36864	0.920769	0.600578	0.655106	1.09858	0.293639	0.448599	0.846084	0.625305	0.472961	0.818702	0.566067	0.685742	0.376879	0.579022	0.380228	0.902354	0.662266	0.609564	0.698755	4.14442	0.453106	0.42006	0.256986	0.297937	0.35736	0.524656
ENSG00000163464	0.71495	1.1117	0.205082	0.185802	0.558384	0.0593385	1.12136	0.0372177	0.356726	0.566176	2.32471	0.957453	0.865855	0.145957	0.702215	0.0300371	0.71804	0.504924	0.187342	0.62195	1.46846	0.177339	0.103683	0.0200603	1.31475	0.998121	0.0344017	2.52025	1.89234	0.345964	0.068316	0.602176	0.359358	0.338128	1.6989	0.0841487	0.464708	0.935274	0.168331	0.609915	0.798217	0.281901	0.0740478	2.84523	0.356981	0.137547	0.251612	0.840096	0.011267
ENSG00000167178	0.272088	0.105742	0.241335	0.821475	0.621546	0.843578	0.0370172	0.132134	0.562325	0.0171386	0.304881	0.0189828	1.1145	0.139214	0.601284	0.134624	0.0711845	0.101488	0.112075	0.245265	0.583074	0.0586432	1.53632	0.443319	0.651837	0.774678	0.966863	0.0404114	0.067765	0.126404	0.206951	0.667036	1.31749	0.364256	0.0818596	0.153118	0.937437	0.0219643	0.127014	0.126256	0.680497	0.208565	1.80712	0.319779	0.0145007	0.143913	0.302295	0.229741	0.354072
ENSG00000260092	0	0	0	0	0	0	0	0	0	0.00986608	0	0.0538435	0.0142508	0	0.01172	0	0	0	0	0	0	0	0	0	0	0.0162647	0	0	0	0	0	0	0	0	0	0	0	0	0	0	0	0	0.0110774	0	0	0	0	0	0
ENSG00000092054	0.00819929	0.0211282	0.122806	0.507269	0.00409267	0.0147799	0.297088	1.37084	0.0218887	0.00689569	2.93077	3.96864	0.0394531	0.253622	2.72458	1.16793	0.0573548	0.0499986	0.0609919	0.0185749	2.1192	0	3.09693	0.00823317	4.13883	6.54162	3.68992	0.00512551	0.0545872	0.00455866	0.0170559	8.07024	0.576628	0.0447252	0.177006	2.92207	1.26037	0	2.13493	0.00507753	0.0951849	3.01379	1.04842	3.30045	0.0478876	0.0250617	2.88751	0.0618897	2.06647
ENSG00000088356	3.57553	2.7856	3.67813	3.92353	3.624	3.42993	3.57599	3.3982	3.67621	3.23718	3.50051	3.93517	3.2219	4.20858	3.23363	4.2414	3.75761	3.75659	3.79198	3.15417	3.40827	4.68688	3.67721	3.6316	3.33313	4.39015	4.29802	3.18838	4.06628	3.86166	3.51074	3.28023	3.98192	3.50589	2.88564	3.85105	2.4051	5.14311	3.13983	3.93513	4.07474	3.42191	2.96424	3.21391	2.90855	3.98722	3.7835	3.10746	4.03959
ENSG00000151632	3.73673	2.77186	6.72457	7.16413	0.953422	4.09639	1.19073	3.29175	3.40126	0.95913	2.10546	5.93001	6.66865	3.48738	3.62153	0.598204	1.80916	5.10233	1.83434	3.27391	2.62598	5.43348	1.30208	6.66101	1.68631	2.29695	6.31497	2.47475	5.33372	0.606976	1.07639	2.71029	4.71207	7.12438	3.81894	1.92579	5.88829	3.46916	3.23528	2.51744	4.31012	1.70053	7.17319	2.91883	2.33503	3.78928	3.68676	1.71062	5.86723
ENSG00000078295	0.00285105	0.0232046	0.536948	0.273093	0.0281727	0.112379	0.0158551	0.15094	0.525139	0.00479014	1.08964	0.224256	0.0511408	0.00905056	0.225277	0.0787602	0.0101181	0.0138074	0.0852714	0.0436707	0.454121	0.165609	0.262892	0.732447	0.214667	0.493645	0.400016	0.0106532	0.0191808	0.00158383	0.0177547	3.11903	0.114715	0.22479	0.0156914	0.241943	0.255083	0.0547668	0.198724	0.00176431	1.0981	0.441597	0.418149	0.708955	0.00337595	0.0203294	0.129363	0.0149393	0.223978
ENSG00000147509	2.53704	2.092	0.892454	1.14969	2.05788	1.20733	2.55294	0.406981	1.61131	2.32902	2.65913	4.33731	1.16505	3.48097	2.23536	2.43943	2.4039	1.84358	1.73169	0.675529	2.68265	1.62494	2.73096	2.06585	1.77716	3.19045	0.804151	2.8219	0.815468	1.31304	0.212567	0.759932	1.05934	1.2875	3.05838	1.15308	0.208097	3.20207	2.86759	2.83424	0.340631	1.40425	1.15802	3.16166	2.69677	1.42925	2.8041	2.39826	2.48112
ENSG00000084623	7.13448	6.96039	6.05477	6.6977	7.03527	6.49048	7.40788	6.48656	6.88324	6.93493	6.95264	7.33236	6.44465	7.50793	6.44115	7.00091	7.05258	6.86796	7.65294	6.52515	7.07033	7.24617	7.01667	7.47974	6.99508	7.21148	6.8388	6.93301	7.31569	6.9751	6.87231	6.69319	6.98261	6.61606	7.21441	7.44302	6.92733	7.80684	6.82756	8.14796	6.37361	6.24041	6.47282	7.08651	7.49318	7.29013	6.89336	6.71519	6.11834
ENSG00000135912	1.94008	1.30131	2.70565	1.79249	1.73504	1.41939	1.7802	2.46301	1.87101	1.68196	1.62017	1.11229	1.83894	2.07227	2.05732	2.18499	1.97645	2.69611	1.44633	2.18519	1.36302	1.9576	2.04825	1.64223	1.84329	2.09946	1.7649	2.29114	2.04905	1.78831	2.72279	1.69206	1.56989	1.81949	2.12145	1.18765	2.39918	1.41604	1.47967	1.39246	2.1891	1.9084	1.66627	1.53455	1.61151	1.73628	2.12074	2.05444	2.98353
ENSG00000164104	5.48383	4.68106	5.34605	5.25525	4.44423	4.49446	5.59472	6.73788	4.67838	5.31207	4.02403	3.66248	5.0916	3.51855	4.04301	4.66936	5.20755	4.76935	4.79765	5.97615	4.36592	7.02463	6.27159	3.89512	4.33258	4.40146	5.59644	4.30592	4.26516	6.70332	6.75682	5.22525	4.72951	4.77107	4.51225	6.42482	4.29555	2.8957	3.55378	5.02061	5.66867	4.77744	5.25293	5.49145	3.80429	5.80017	5.65421	4.89765	5.11331
ENSG00000188991	0	0	0	0.0105108	0.00850974	0	0	0	0	0	0	0.0198052	0	0	0	0	0	0.00754771	0.00808578	0	0	0	0	0	0	0	0	0	0	0	0	0	0	0	0	0.0104983	0	0	0	0	0	0	0.00806162	0	0	0	0	0	0
ENSG00000177889	3.73748	3.91739	3.67339	3.63555	4.10387	3.1097	4.13806	4.02087	3.78923	3.94403	3.78333	2.65778	3.59262	2.00758	3.56506	3.95403	4.22008	3.68392	3.77437	3.73166	4.37918	3.9282	4.09803	4.15595	3.67466	3.69297	4.1239	3.95293	4.1474	3.98122	3.95234	3.63471	4.30442	4.10536	3.61159	4.01073	3.87034	1.7024	3.73766	3.18091	4.0176	3.92116	4.10862	3.97388	3.75299	4.16653	4.16178	3.8342	3.84066
ENSG00000222011	0.611243	0.933868	1.30311	1.76075	1.16067	1.06682	1.17976	2.01141	0.948005	0.916088	0.78381	1.24006	1.3871	1.1409	1.12943	1.10746	1.41873	1.33809	0.928266	1.26702	1.28741	1.70738	1.41546	0.815196	0.935143	1.07886	1.55749	1.18026	1.05819	0.976067	1.33894	1.12476	1.02255	1.1917	1.2421	1.10428	0.716734	1.01459	1.48472	0.791897	1.04098	0.665065	1.41928	0.982539	1.02776	1.53063	1.40891	1.10954	1.10488
ENSG00000154678	0.0179942	0.119862	0.103037	0.10745	0.0670109	0.162757	0.0182748	0.0351985	0.162868	0.144706	0.107341	0.0497422	0.0896384	0.0205896	0.0843329	0.255691	0.00642787	0.031659	0.115307	0.0994143	0.092146	0.0261812	0.0364789	0.08302	0.112945	0.0421316	0.0673437	0.0716839	0.0639016	0.01997	0.0397475	0.178574	0.0933307	0.112664	0.0670573	0.0395632	0.0477666	0.0169968	0.0206486	0.0441218	0.225006	0.0219884	0.246176	0.11255	0.0339095	0.0257482	0.122707	0.0203767	0.0121657
ENSG00000269095	0	0	0	0	0	0	0	0	0	0	0	0	0	0	0	0	0	0	0	0	0	0	0	0	0	0	0	0	0	0	0	0	0	0	0	0	0	0	0	0	0	0	0	0	0	0	0	0	0
ENSG00000165029	2.85022	2.56428	2.95461	3.12477	3.79748	3.84884	2.74751	2.20624	2.27352	3.88635	3.32734	1.28999	2.92136	0.941029	2.62548	2.06805	2.53436	2.66631	2.82004	4.50668	2.74871	0.749957	2.77995	3.32159	3.59494	3.2185	2.85816	2.99573	2.89837	2.13851	2.01364	2.70722	2.84859	4.16001	1.37072	1.09748	3.22525	1.02642	1.71176	1.54836	1.71597	4.21837	3.28575	2.88075	1.81316	2.78303	3.55656	3.90895	1.85841
ENSG00000223569	0	0	0	0	0	0	0	0	0	0	0	0	0	0	0	0	0	0	0	0	0	0	0	0	0	0	0	0	0	0	0	0	0	0	0	0	0	0	0	0	0	0	0	0	0	0	0	0	0
ENSG00000196290	3.48518	3.20688	3.72989	3.98429	3.88317	2.7699	3.98877	4.28589	3.40422	3.07751	3.16432	2.20885	3.93182	3.47356	3.48642	3.56405	3.34873	4.02418	3.50508	3.87605	3.9556	4.63272	3.41442	3.36723	3.56673	3.72091	3.70915	3.25976	3.02404	3.88756	4.30693	3.11741	3.72427	3.35248	3.47835	3.23585	2.92757	2.48472	3.57336	2.48411	4.94242	2.71519	2.98604	3.01362	2.20538	3.86562	4.06228	3.19035	3.34883
ENSG00000148677	0.025072	0.174491	0.151589	0.256288	0.0125513	0.0886093	1.01708	1.14771	0.358545	0.102569	6.00592	2.88562	0.0749111	0.739188	2.58312	2.49956	0.0223221	0.107654	0.404633	0.0655725	5.58553	0.126119	2.4246	0.0862552	3.52486	6.28947	4.7996	0.10652	0.0282411	0.108189	0	6.90714	1.7014	0.186947	0.828069	4.91445	2.55494	0.145889	3.06165	0.105557	0.0703162	3.81484	1.94687	4.31454	0.0442439	0.0509291	3.59736	0.0502977	4.19677
ENSG00000153898	0.588769	0.278655	0.626279	1.25758	0.299947	0.510866	0.826131	0.467299	1.05757	0.656414	0.70102	0.422676	0.743425	0.284565	0.419427	1.67486	0.749623	0.391561	0.696419	0.466691	0.928693	0.211104	0.908014	0.571249	1.55732	0.959725	0.361668	0.551645	0.50065	0.765197	2.1306	0.872051	1.07843	0.523568	0.483372	0.462922	0.389114	0.209584	0.81373	0.890791	0.766129	0.616593	1.10859	1.03612	0.591992	0.220669	0.997469	1.48078	0.678726
ENSG00000146085	2.63994	3.31707	3.3025	2.95315	3.18726	3.23243	3.54854	4.14825	3.11911	3.27291	3.14974	1.38767	3.58025	1.70007	3.07708	3.65946	3.28412	3.48802	3.78109	4.34019	3.64764	3.07657	2.97784	2.9741	3.25641	3.32241	3.19235	3.08855	3.70337	2.95839	3.8906	3.26217	2.98942	2.86988	3.17151	3.49108	3.58606	2.64937	2.62852	2.5705	4.22592	3.11439	3.7567	3.10395	2.92035	3.52813	3.44923	2.96317	4.22184
ENSG00000009844	2.94444	3.28917	3.42655	2.8082	3.30826	2.35207	3.30481	3.62467	2.69984	3.63662	3.04419	2.2309	3.0576	2.23148	3.1727	3.24105	3.46035	3.23214	3.12337	3.57942	3.38288	2.22021	3.05734	2.88459	3.32207	3.02788	2.74043	3.36855	3.72295	3.42147	2.74883	2.98821	3.43508	3.17243	3.15449	3.58499	3.44784	2.4623	3.37614	2.44013	3.71662	3.34591	3.60888	2.8449	2.52422	3.19714	3.3865	3.00625	3.2656
ENSG00000159263	0.166604	0.360203	0.594581	1.04167	0.725168	0.449827	0.0617722	1.84291	0.989174	0.429563	0.221532	0.581428	0.529907	0.0650966	0.107039	0.633519	0.0847315	0.234287	0.45567	0.957151	0.266896	0.255485	0.268832	0.861713	0.333683	0.682138	0.367725	0.141873	1.41643	0.243402	3.54486	0.273458	1.28964	0.769682	0.426253	0.603035	0.586994	0.408377	0.272974	0.42757	1.6971	0.296831	1.53856	0.777733	0.0754575	1.47487	0.111262	0.377542	1.54952
ENSG00000121766	4.91012	4.12232	3.39284	4.0138	4.99968	3.65217	4.5329	4.33382	4.25406	4.16532	4.54734	4.42389	3.63972	3.83857	4.03105	4.58087	4.26183	3.92362	4.90975	4.72075	4.97982	4.90262	4.07271	3.80387	4.56838	4.24103	3.84465	3.98765	4.23882	4.10228	4.43882	3.91959	4.11797	4.01354	4.46283	4.565	4.13577	4.27199	3.95869	5.28397	3.5764	3.46154	3.23765	3.88098	4.16595	4.76103	4.13685	3.97003	2.94901
ENSG00000125746	3.08252	3.04223	2.78008	2.11756	3.30106	2.9188	2.7581	3.92066	3.59359	2.97845	2.45317	2.55905	2.89991	2.79712	2.30056	2.86887	3.22996	3.19626	3.41609	2.93392	2.2483	3.48205	2.95122	3.54321	2.49095	2.24252	3.60958	3.25202	2.34321	2.88424	3.05666	1.89013	3.60871	2.75766	3.19729	2.84879	2.69932	3.35069	3.53879	2.22794	2.65159	4.17464	3.52204	2.60634	3.7782	2.8973	2.34264	3.10721	3.4232
ENSG00000005421	0.0262695	0	0	0	0.0261883	0.0106045	0.01784	0.0164668	0.124808	0	0	0.0204371	0	0	0	0	0	0	0.00834485	0	0	0	0.00856017	0	0	0	0	0	0	0.00978049	0.0122402	0	0.00744958	0	0	0	0.00762553	0.0353239	0	0.105383	0.409349	0	0.0811159	0	0	0	0	0	0
ENSG00000178623	0.312678	0.245229	0.545542	0.655707	0.213757	0.209155	0.0682845	0.520443	0.57005	0.263728	0.460637	1.62298	0.529601	0.700087	0.140359	0.125008	0.7581	0.254377	0.400092	0.2303	0.514492	0.108566	0.462094	0.236318	0.933697	0.666342	0.17101	0.200373	0.374025	0.398328	0.56452	0.473148	0.497719	0.126264	0.0533721	0.338314	0.274284	0.480701	0.192023	0.875768	0.509367	0.201214	0.262492	0.319507	0.143993	0.206273	0.439542	0.565724	0.210584
ENSG00000116690	0.0343187	0.0709973	0.131763	2.67005	0.0438408	0.0178172	0.08797	0.596831	0.139429	0.00416473	0.066865	0.0342587	0.0357544	0.0373925	0.232974	0.0442293	0.0348794	0.0346631	0.134497	0.0875328	0.0649742	0.020537	0.0613433	0.053787	1.16633	1.22786	0.644711	0.0276176	0.0222071	0.0487568	0.0739877	3.05144	0.565209	0.105672	0.031011	0.139568	0.244256	0	0.114487	0.0718404	0.145118	0.13296	0.501463	0.722728	0.0175211	0.0301901	0.031556	0.0396155	0.583885
ENSG00000081853	0.261402	0.143543	0.273447	0.25568	0.0688259	0.265403	0.0225049	0.0378623	0.105835	0.0461831	0.167591	0.0342654	0.0792516	0	0.0866031	0.426618	0.150744	0.128939	0.221741	0.119058	0.138829	0.0382777	0.049757	0.0368967	0.107359	0.184161	0.166116	0.0703058	0.181187	0.0646621	0.109627	0.41279	0.466316	0.207562	0.197478	0.0539431	0.280101	0.294186	0.0534055	0	0.175509	0.602252	0.118037	0.248078	0.0476894	0.0670733	0.131438	0.135082	0.0734346
ENSG00000104804	0.0655221	0.00960734	0.0554082	0.0932785	0.0221043	0.026665	0.011303	0.571618	0.142555	0.0370858	0.146421	0.217026	0.0533463	0.198889	0.0654729	0.0134223	0.0197389	0.244654	0.0313984	0.0417256	0.121377	1.0464	0.0215476	0	0.0276142	0.0607699	0	0.0344672	0.469078	0.0246037	0.161557	0.0618136	0.0555723	0.0688672	0	0.0671586	0.0475399	0	0.0116185	0.144553	0.0377002	0.100929	0.402431	0.0704756	0.0646851	0.0671123	0.0178492	0.0445266	0
ENSG00000140854	2.81667	3.29882	2.1501	2.52554	3.67304	2.85039	2.67624	3.43205	3.97459	3.0975	2.42491	2.87507	3.38943	1.77536	3.58924	3.57782	2.62026	3.95675	3.99099	3.0673	2.93391	3.55562	3.64738	3.47491	3.21976	3.17458	2.69591	3.44969	2.82633	2.64273	2.77273	2.64768	3.30093	3.19887	3.04979	3.02543	2.93534	2.33536	3.47603	2.99199	3.58622	3.26379	2.73824	4.16507	2.92521	3.39795	4.26514	2.75234	3.12577
ENSG00000170959	0.00190039	0.0227895	0.0718909	0.0093421	0.00944752	0.0649397	0.00193018	0.0847757	0.00509178	0.026923	0.00604073	0.0817938	0.0699647	0.0120489	0	0.0102921	0.00337894	0.0233418	0.0107657	0.0157666	0.011709	0.0582658	0	0.0208533	0.00237083	0.023577	0.00438139	0.00118699	0.00214277	0.0042176	0	0.00153491	0.0128013	0.0616952	0.00300054	0	0.0862199	0.0553575	0	0.0093802	0.0448084	0.00682786	0.167636	0.00613378	0.0179057	0.0155073	0	0.00307559	0.00427058
ENSG00000272921	0.0599252	0	0	0.0372118	0.0887103	0.140343	0.0307437	0.0562263	0	0.0505402	0.0321026	0.0695548	0	0	0.0302507	0.0183464	0	0.026791	0.0286873	0	0	0	0.0582564	0	0.037677	0.0825742	0	0.0189788	0.0340926	0.0335822	0	0	0.0256289	0	0.0475313	0	0	0	0.0315959	0.0373621	0	0.043384	0.0286022	0	0	0	0	0.0487015	0
ENSG00000163221	8.00097	7.20162	0.61932	2.13206	1.82256	5.32205	4.46296	3.81612	5.07256	4.33819	7.54453	6.41079	4.89287	6.33121	6.03078	0.754576	3.91824	7.95542	4.81171	6.39082	5.88946	2.31579	3.9308	3.18648	2.72226	1.79288	1.58932	6.63468	4.63825	2.08253	3.37338	2.2911	2.04033	2.61521	8.82766	4.37151	3.27682	6.20499	3.83663	4.84798	4.46628	3.58974	1.1591	3.57028	6.9819	8.32268	6.84032	6.02847	0.202424
ENSG00000006377	0.0428914	0.193078	2.13159	2.19593	0.552155	0.927976	0.0146647	1.93649	0.18257	0.261483	0.0895516	0.113703	1.74619	0.435096	0.252138	0.81461	0.0255873	1.47182	0.112333	1.01271	0.367604	1.42082	0.403277	1.41499	0.550294	0.672429	1.94017	0.755139	0.874749	0.912652	0.0496038	0.123476	1.95367	2.04814	0.152139	1.3207	0.943005	0.478698	0.130307	0.404425	1.61245	0.862481	1.83175	0.217317	0.836934	0.9699	1.04205	0.0744079	1.39132
ENSG00000198105	0.692757	0.475219	1.08883	1.26401	1.18371	0.975246	0.589939	1.13295	1.09938	0.279837	1.0018	0.773584	1.13438	0.437565	0.914264	0.962994	0.675298	0.808131	0.773966	0.946384	1.13369	1.28604	0.672861	0.682201	0.637175	0.62487	1.19219	0.770519	0.949495	0.912831	1.28298	0.927036	0.820774	1.25465	0.780693	0.599758	0.589255	0.329769	0.803612	0.576951	1.78394	0.461381	0.838938	0.832513	0.348675	0.992914	1.19006	0.668588	0.655696
ENSG00000095794	1.30637	1.83103	1.83385	2.9417	1.25316	1.47788	1.25586	1.73687	2.20561	1.75902	1.99897	1.52898	1.71862	1.39541	1.79225	1.53209	1.84544	1.55304	1.69464	1.86352	2.54734	2.13773	1.7395	1.49182	2.25438	1.90444	1.98821	2.05357	2.3635	1.85723	1.95888	2.1927	1.91483	2.33904	1.15754	1.40092	2.1435	1.16611	1.55673	1.74245	2.10861	1.75861	2.39409	2.39375	1.92087	2.06841	1.61813	1.36568	1.49617
ENSG00000080910	0	0	0	0	0	0	0	0	0	0	0	0	0	0	0	0	0	0	0	0	0	0	0	0	0	0	0	0	0	0	0	0	0	0	0	0	0	0	0	0	0	0	0	0	0	0	0	0	0
ENSG00000023041	3.41024	2.77275	2.91834	3.2876	3.38337	3.09179	3.81099	3.2427	3.20545	2.86228	2.90916	2.05233	2.92101	2.19188	3.02674	2.93871	3.42822	3.68931	2.3976	3.25146	3.5201	3.4863	2.99536	2.18605	3.27408	2.96721	3.43632	3.53111	3.17836	3.27825	3.35049	3.04326	3.13623	3.25396	3.5122	3.16302	2.98324	2.15458	2.91056	2.70862	2.82083	3.12413	3.0088	3.22461	2.40227	3.39824	3.37187	2.96489	2.96871
ENSG00000249141	0.230774	0.0702364	0.342533	0.776058	0.0409912	0.0971306	0.0823328	0.406095	0.389775	0.0346428	0.452195	2.90005	0.317424	0.764684	0.23061	0.166246	0.269896	0.205796	0.0769163	0.121203	0.700954	1.14095	0.292444	0.461944	0.324827	0.164094	0.302747	0.304152	0.371177	0.132671	0.357848	0.247055	0.709575	0.296506	0.0644204	0.400775	0.232783	1.72285	0.125071	1.05175	0.641657	0.087368	0.184588	0.506426	0.141065	0.824033	0.12823	0.247602	0.0908832
ENSG00000184271	0.387655	0.387617	0.977207	1.18547	0.454689	0.766341	0.39619	0.442605	1.308	0.531688	0.990882	0.453199	1.04128	0.403396	0.571932	0.417455	0.19346	0.224123	0.670918	0.580755	0.803317	0.209313	0.227428	0.835101	1.10214	0.851425	0.761035	0.420313	0.566386	0.81154	0.749568	1.98361	1.32892	1.10161	0.263304	0.328009	0.722984	0.164107	0.268503	0.647754	1.07484	0.437878	0.867312	0.833697	0.305012	0.292067	0.43013	0.384629	1.17856
ENSG00000173546	4.68072	4.92911	2.8745	3.50776	4.10235	3.1462	3.50409	1.37196	5.9171	5.3688	6.03759	1.98313	1.40539	3.32306	5.07426	4.94981	4.22753	2.06962	4.75351	2.66723	4.06572	1.18774	4.06079	0.986392	4.46978	5.28255	2.64794	4.35775	3.43284	4.31651	0.358776	5.01175	3.5956	2.21402	1.10444	4.2714	4.79164	2.11832	4.27348	4.75178	2.39676	5.32709	1.69447	6.39822	2.6199	0.85304	4.85211	3.40682	3.89718
ENSG00000178372	10.9292	9.8443	1.94814	4.10833	2.27649	8.88178	1.89836	7.71439	7.2103	2.95536	6.6103	6.43793	4.8687	10.2436	9.02305	5.82732	5.25884	6.73913	5.4485	6.96819	6.02292	9.62976	6.43632	2.2908	5.09632	3.42012	5.00676	3.54761	8.31102	6.68675	9.37166	3.13405	3.46413	2.02145	8.09231	7.3782	7.75659	9.77643	6.507	5.9486	6.06766	5.38296	0.362908	4.08124	7.53963	8.72542	5.85001	5.32328	0.398262
ENSG00000147439	1.27664	1.60501	2.52486	1.4588	1.73639	2.2324	2.20885	2.09278	1.60678	1.35191	1.86755	0.926116	1.43352	1.0225	1.0034	1.70217	1.76946	2.19317	1.56066	1.94528	2.01353	1.88547	2.06349	1.62667	1.51415	1.78902	1.51924	1.25073	1.57641	1.83186	1.94118	2.22533	1.63967	1.91016	2.43798	2.19592	2.05977	0.904519	1.47239	1.24545	1.41797	1.72	1.80448	2.25724	1.81365	1.88159	2.38927	1.68353	2.17109
ENSG00000176383	1.12668	0.949963	0.795379	0.179077	0.848069	1.19935	0.570079	0.213413	0.628206	0.692081	1.02022	1.19131	0.716494	1.82053	0.899026	0.337302	0.438609	0.83295	0.965525	0.346979	0.573191	0.792779	0.799303	0.837823	0.879642	0.655665	1.1115	0.577192	1.20242	0.525572	0.454633	0.200813	0.760424	0.369491	1.15876	0.190431	0.368723	1.6646	1.31655	1.66401	1.23195	0.25622	0.522602	0.937028	1.05489	1.21826	0.33527	0.743021	0.476085
ENSG00000123560	0.00411154	0.0281439	0.0776715	0.162934	0.0122614	0	0	0.338864	1.13118	0.00690588	0.0514968	0.119578	0.0198906	0.0413184	0.148436	0.0392203	0	0.574713	0.307844	0.02475	0.266528	0.00855713	0	0.0286548	0.345555	0.115355	0.144528	0.0280086	0.02303	0	0	0.585101	0.0942919	0.0064844	0.00648887	0.025116	0.22698	0	0.0506894	0	0.104079	0.0637715	0.0383634	0.0965161	0	0	0.0262361	0.0362066	0.0634081
ENSG00000234068	0	0	0	0	0	0	0.0749285	0	0.0499031	0	0	0	0	0	2.11445	0	0	0.0654222	0	0.056274	0	0	0	0.0375248	0	0	0.0848198	0.0234502	2.97008	0	0	0.0598899	0	0	0.169093	0	4.20283	0.64744	0.0389999	7.04693	0	0.0269977	0.168509	0	0	0.281142	0.0596142	0	0
ENSG00000260691	0	0	0.0268746	0	0.025447	0	0.0194857	0.0239327	0	0.010784	0.00681543	0	0	0	0.00641903	0.0154591	0	0.0225851	0.0181776	0.0432591	0.00661878	0.0397094	0.00624181	0.0128723	0	0	0.00740914	0	0	0	0.00892826	0.00519009	0	0.0101267	0	0	0	0	0	0	0.00731882	0.00462687	0.0300805	0	0	0.0390557	0	0	0.00722194
ENSG00000125744	1.91648	1.52437	2.03608	1.56581	1.03707	1.66653	1.82639	1.53983	2.7636	1.46274	2.90088	2.34136	1.75054	3.66266	2.11601	2.27238	1.29193	1.3576	1.76546	1.06218	1.97494	3.14207	1.40597	3.0295	1.95144	2.58497	3.22024	1.34416	1.36213	1.22198	2.02247	4.68024	2.70976	1.63089	1.3781	1.70547	2.63994	1.17926	2.38494	1.94732	1.58324	2.59729	1.87412	2.10972	1.85864	0.621093	1.29091	1.39778	3.02694
ENSG00000157315	0.40014	0.314944	0.332262	0.347845	0.551592	0.454369	0.484984	0.452743	0.514684	0.434425	0.407207	0.156446	0.393913	0.340217	0.765707	0.493714	0.501337	0.407067	0.288321	0.188723	0.340295	0.691549	0.416237	0.229988	0.166993	0.26891	0.360284	0.307989	0.501705	0.536596	0.513519	0.43027	0.333158	0.255859	0.302192	0.59875	0.352257	0.281646	0.373219	0.278502	0.692843	0.339675	0.11271	0.581809	0.302121	0.408794	0.520836	0.261882	0.52846
ENSG00000015532	3.56578	2.43537	3.50205	3.4061	4.05873	3.66707	3.1972	2.72169	3.4968	2.5969	3.67273	3.38252	3.54243	2.79618	2.46802	4.15545	3.22524	2.47549	3.68267	2.84622	3.14554	2.36078	3.73883	3.6959	3.23286	3.75345	4.05525	2.86218	2.65645	3.45967	3.00443	2.38448	3.51483	3.16202	2.59267	2.80175	2.58564	3.06999	2.60113	3.22916	3.43555	3.29594	3.42614	3.70826	2.00531	1.95547	3.76202	2.99177	4.00135
ENSG00000090382	4.83262	6.67109	6.88623	9.14531	2.52712	5.21477	2.70781	3.40998	6.44405	2.6128	4.44871	3.18716	7.05577	2.48024	5.30264	3.1935	7.05343	4.96606	5.18878	5.78217	7.16127	2.42385	4.77248	3.13438	8.60843	7.3871	4.69507	5.92491	6.30233	4.55841	9.09668	6.83317	9.18087	8.48217	2.91439	5.11451	6.79335	2.0919	3.83138	3.02959	6.91032	5.87586	5.54655	5.27182	6.05068	5.42573	5.48149	7.41669	2.98594
ENSG00000165732	4.71096	5.52379	5.21777	4.72763	5.30231	4.90632	6.05363	4.89514	4.8441	6.00095	4.3301	1.99785	5.13599	2.11976	4.91897	4.9736	5.4897	6.09517	3.92938	5.54875	4.7909	4.20967	4.67003	5.06331	5.58808	5.33499	4.89068	6.54611	6.06145	5.09439	5.09977	4.53112	4.93505	5.70352	5.18544	4.85559	6.16663	1.91763	4.70524	3.38278	6.00462	5.5987	5.36802	5.9227	5.67776	6.25298	5.68634	5.54265	5.66333
ENSG00000103043	2.95948	2.83475	2.64081	2.75794	2.976	3.42726	3.19668	3.26991	3.19498	3.27911	2.89631	3.28735	3.26456	3.61001	3.86093	3.70162	3.07828	3.04492	2.80589	2.6548	2.76848	3.93461	2.96491	2.60423	3.45988	3.74807	2.76788	2.92111	2.96432	3.2705	3.74606	2.92016	3.22841	3.59648	3.16437	2.97005	3.03076	3.26314	2.71152	3.48527	3.74259	2.75417	2.1588	3.6935	2.2927	2.84613	3.72733	3.0373	3.18304
ENSG00000124486	3.14984	3.3607	4.51375	2.92675	3.85538	3.92184	3.23059	3.55277	2.92537	3.16441	3.50293	1.71256	3.40907	1.69751	3.327	4.5244	3.46736	3.06118	3.36328	4.35138	2.93507	2.56761	3.47199	2.95382	3.90897	4.01012	3.49007	4.14557	4.5164	3.22438	3.54347	3.80625	4.28706	4.24452	3.6976	2.80636	4.22664	1.42723	4.19307	3.06899	4.1667	3.46539	3.46016	3.27117	3.28569	3.3858	3.83932	4.04736	3.22657
ENSG00000136874	1.98038	2.29357	2.96229	1.90364	2.42309	2.44092	1.97279	2.13473	1.74034	2.77442	1.67359	0.697992	2.09307	0.878324	1.91106	1.70558	2.59116	2.38081	2.17565	3.159	2.19725	1.24676	2.44762	1.93163	2.7605	2.26971	1.7826	2.56951	2.28783	1.33807	2.14601	2.1941	2.09925	2.41943	2.58774	1.63587	1.84147	0.559639	2.38787	1.0952	2.1207	2.23298	2.46462	1.83707	1.99031	1.98382	2.87269	3.20168	1.44153
ENSG00000164105	2.19772	2.08114	2.70369	2.73357	1.58704	2.75733	2.73826	3.44307	2.5563	2.10535	2.89571	2.51443	2.5661	3.03692	2.16764	2.53362	2.63533	1.69678	2.84009	3.04446	2.00217	4.22461	3.10166	1.9646	2.16754	2.21167	3.31623	1.42344	2.02412	3.85212	3.54089	2.51131	2.48785	2.5847	1.87877	2.97994	2.6234	0.299178	1.10608	2.55519	2.4177	1.61452	2.74852	2.23129	0.951444	2.74057	1.83887	2.10361	2.19415
ENSG00000143319	3.6129	3.63292	4.00604	3.5523	3.9681	3.18082	3.67724	4.11639	3.64787	4.0152	3.21514	2.86563	3.60367	2.94	3.38186	3.33713	3.68719	4.60141	3.30302	3.77337	3.47053	4.39911	3.43648	4.3678	3.57341	3.34182	3.52324	3.91223	3.63886	3.77919	3.67794	2.84058	3.74913	3.78879	3.57266	3.52857	3.70322	2.61834	3.58838	3.55619	4.04908	3.86003	3.12785	3.82481	3.55437	4.59631	3.62722	3.6079	4.05531
ENSG00000166140	3.20554	2.41192	2.50892	2.2101	3.10228	3.38268	3.09036	3.02911	3.24193	2.70346	2.67279	4.00135	2.41418	3.58411	2.30099	2.07579	2.44938	2.05663	2.02251	2.49657	3.2611	4.03268	3.16114	2.17775	1.9796	2.50291	2.87831	1.82132	2.64888	3.21094	3.36322	2.28805	2.4229	2.41293	2.82083	3.08368	1.70816	3.53242	2.53181	3.65836	3.11523	2.99564	2.89396	2.4028	2.39036	2.78965	3.32327	2.69535	2.13887
ENSG00000165730	0.190284	0.110629	2.1443	1.17119	0.074932	0.204452	0.79966	0.364021	0.0822694	0.47751	0.0367398	0.169363	0.505651	0.0866011	0.22054	0.0417204	0.322862	0.435487	0.163129	0.620995	0.0566883	0.856559	0.123993	0.331976	0.196088	0.360195	0.880784	0.0891634	1.52077	0.320036	0.274586	0.195687	0.732544	1.5452	0.167184	0.0919561	0.0939694	0.0187993	0.0574303	0.0342991	3.7911	0.429156	3.8443	0.119597	0.208467	0.630467	0.0112315	0.135392	0.252595
ENSG00000175745	0.324092	0.634322	2.03691	1.58715	0.567155	1.11023	0.677826	2.11355	1.24357	0.505889	1.40933	0.344023	1.06325	0.243551	1.72526	0.988647	0.481974	0.336599	1.19566	1.08852	0.837626	1.61215	0.163954	1.98867	1.80472	1.23477	1.91557	0.469037	0.899984	0.168401	1.78528	2.01596	1.78657	1.52458	0.476453	1.21172	1.85832	0.397781	0.312015	0.698873	1.90074	0.854735	1.21277	0.585451	0.203635	1.55904	0.645442	0.448211	1.096
ENSG00000186017	0.390089	0.419171	0.42041	1.03007	0.644299	0.508238	0.498977	1.32327	0.768554	0.342263	0.722779	0.224437	1.85085	0.355336	0.398634	0.808271	0.11229	0.735322	0.741346	0.765372	0.485313	1.33199	0.247602	0.51603	0.679091	1.00534	0.702099	0.181048	0.768269	0.889929	1.35404	1.04204	0.83408	1.03699	0.359799	0.428528	0.562717	0.345712	0.277861	0.289079	1.24277	0.789303	0.812004	0.527296	0.0757207	0.700795	0.54635	0.394155	0.3796
ENSG00000221852	0	0.251857	0.0527734	0.0765283	0	0.146013	0.0425576	0	0.307065	0.0177638	0.108612	0	0.0256275	0	0.1025	0.0127752	0.0373367	0	0.0397218	0.0475494	0.24151	0.127186	0.09976	0.0420809	0.0521075	0.0578852	0	0.114803	0.0928512	0	0	0.0170696	0.0178599	0.217649	0.0331989	0.0514068	0.0363317	0	0.0220319	0	0.116338	0.0890236	0.115694	0.514748	0	0.0429353	0	0	0.0470446
ENSG00000123562	6.0911	6.14504	6.33694	6.66497	6.55175	5.44883	6.20209	5.86382	6.176	6.35093	6.90437	5.62729	6.10602	3.92167	6.53387	7.15651	6.07245	6.82724	6.57001	6.02553	6.75352	7.35729	5.90949	7.44745	5.8233	6.09152	6.14994	6.27076	6.10876	6.51296	5.76936	6.06555	6.1193	6.49525	6.32825	6.13495	6.26265	3.46327	6.29733	6.39813	6.42857	6.76804	6.51959	7.23213	5.89493	6.35409	6.60615	5.71083	6.12096
ENSG00000073756	0.337281	4.13866	4.60587	2.08719	0.882405	0.502185	4.41732	3.72931	0.972717	4.0944	1.51698	1.06801	0.968529	2.34018	4.14499	2.17464	2.02254	5.67689	3.06213	3.57811	1.83096	1.10627	0.434932	1.2974	3.18856	0.561242	0.353074	3.75568	3.08666	0.690849	0.350241	2.20659	1.62356	0.506815	4.78622	3.97447	2.70178	0.717143	5.66967	0.929195	2.75285	1.93624	6.72612	5.37806	2.04509	4.20185	1.2677	1.65935	4.19203
ENSG00000074755	1.26074	1.88516	2.76078	1.6675	2.0021	2.71734	1.98729	2.78375	2.04704	2.1696	1.86237	1.03269	2.71222	1.36696	2.76551	2.49931	2.00654	2.07075	1.89535	3.0524	1.57481	1.70746	1.93527	1.8316	2.66467	2.37894	1.88699	2.63807	1.98562	2.71325	2.87162	3.17831	2.55083	2.1229	2.53061	1.80322	2.55007	1.12654	2.35171	1.59163	3.16424	2.6747	2.22064	2.42398	1.68833	1.847	2.23117	2.80967	2.39082
ENSG00000164299	0.0255064	0	0.0944215	0.0157671	0.0127698	0	0	0	0	0	0	0.029662	0.452858	0.44696	0.0127998	0	0	0.221	0.0121345	0	0	0.0265737	0	0.343309	0	0	0.100343	0	0.0287299	0.028299	0.017788	0	0.114923	0	0.0201812	0	0	0.0172524	0	0	0.0145895	0	0.0240959	0	0	0	0	0	0
ENSG00000137500	1.10262	1.84271	2.90793	2.71387	2.55416	2.03509	2.46522	1.91449	2.3731	2.00734	1.97203	1.29111	2.0172	1.51627	2.41841	3.06	2.60284	1.95222	2.44546	2.32117	3.07676	2.52369	1.78791	2.43625	2.45415	2.07864	1.99285	2.02589	2.38448	1.70265	2.00435	2.45686	2.09624	2.96388	2.93591	2.53749	2.08144	0.967746	2.06262	1.50502	2.85361	1.77108	1.80279	1.84547	1.84881	2.53907	2.28072	2.25305	1.67409
ENSG00000159082	0.911724	1.1723	1.30708	1.08967	1.30948	0.971234	0.799179	1.20237	1.13701	0.961128	1.14922	0.362191	1.33119	0.376451	1.52682	1.5726	1.48003	1.25516	1.24986	2.26319	0.955379	1.20684	1.37022	0.991715	1.52881	1.29683	0.715733	1.57782	1.70552	1.5025	2.29513	1.51383	1.18495	1.45266	1.05635	0.53839	0.997724	0.234953	1.39105	0.456603	1.93526	1.1144	1.04936	1.43787	1.02581	1.32329	1.70482	1.42927	1.67572
ENSG00000159202	5.49545	4.45701	5.69801	4.67797	4.90572	4.78842	5.06368	4.90527	4.74327	5.04639	4.45485	4.38856	4.71882	4.37999	4.6271	5.33505	5.20367	4.4635	4.59227	4.70432	5.20881	4.55655	5.24369	4.7472	5.1416	5.2837	5.28446	4.74874	4.4784	4.67099	5.29792	4.40157	5.33971	4.8786	4.44738	4.78826	4.79296	4.54079	4.56697	4.72165	5.06106	4.98214	4.59935	4.54614	4.37734	4.83548	5.07836	5.16963	5.15635
ENSG00000136861	2.44494	2.25843	3.2173	3.31778	2.72083	2.7742	3.39635	2.86477	2.48358	3.41421	1.97009	3.27708	3.11112	1.90115	2.24175	2.48484	2.61823	2.58599	2.3428	4.14282	1.81618	3.25466	2.59079	2.56002	2.74943	2.9984	2.93008	2.75148	2.51095	2.73072	3.34465	3.55199	3.09228	3.57852	2.41707	2.2261	2.02721	2.54882	2.41619	2.0871	2.7807	2.89048	4.16887	2.79336	2.20203	2.48166	3.15754	3.3562	2.57528
ENSG00000118113	0.00726081	0.0971423	0.0423103	0.177028	0.070798	0.36247	0.0721011	0.00680492	0.298741	0.0362549	0.407706	0.175393	0.0691327	0.182476	0.0288046	0.0769832	0.135839	0.0191737	0.131681	0.121609	0.303283	0	0.095762	0.204131	0.0447126	0.107132	0.432185	0.517669	0.00818495	0.0160779	0.0201103	0.0519593	0.200701	3.12384	0.0114519	0	0.183111	0.0857693	0.0151215	0	0	0.0208074	0.0136813	0.0463066	0.0256334	0.0148432	0.0907018	0	0.0403582
ENSG00000131849	0.789698	0.508013	0.840054	0.467814	0.718226	0.47801	0.456975	1.15524	0.537115	0.36882	0.692799	0.115147	0.650879	0.15087	0.660368	1.08787	0.530269	1.17131	0.534894	0.422078	0.695632	1.10245	0.319103	0.369237	0.765047	0.81917	0.889485	0.87977	0.741851	0.487291	1.51819	1.26504	1.04534	1.07724	0.758913	0.628176	0.633324	0.177094	0.399722	0.146887	0.544779	0.403582	0.294137	0.505925	0.29078	0.416016	0.390994	0.498279	0.207547
ENSG00000120937	0	0.030782	0	0	0	0	0	0.0334008	0	0.029999	0.037764	0	0	0	0	0	0	0	0	0	0.0366856	0.143003	0	0	0	0	0.0410157	0.0223437	0	0	0.0969877	0	0	0	0	0	0	0	0	0	0.0405214	0.0257254	0.0336535	0	0	0	0	0	0
ENSG00000188352	2.09837	1.85071	2.87292	2.32302	1.45703	2.92192	2.53334	1.96316	1.6853	3.02655	2.08242	0.918166	2.01562	1.76162	2.19107	2.6807	2.35272	1.86511	1.8815	1.53052	1.56514	2.43174	2.16874	2.27215	1.95573	2.15681	1.89532	2.31723	1.1379	2.55802	2.3826	2.19984	1.99071	2.562	2.35297	2.08031	1.92354	1.34546	2.15577	1.80902	0.875934	1.94497	3.03256	1.56745	2.00475	1.65392	1.4713	2.83897	1.36531
ENSG00000003147	0.278337	0.832127	1.45384	1.72947	0.163767	0.808863	0.152728	0.413961	0.93961	0.230105	0.515015	0.357119	0.900646	0.615931	0.445171	0.235915	0.367619	0.486718	0.946397	1.75189	0.650845	0.955222	0.279341	0.36166	1.00963	0.499551	0.363377	0.342527	1.47699	2.74825	0.67977	0.993495	1.89601	0.857355	0.0709622	0.691912	0.419588	1.29534	0.226936	0.405664	1.89851	0.432683	2.87828	0.938939	1.13835	1.58801	0.39975	0.386485	0.163045
ENSG00000154025	0.215787	0.866802	0.0291247	0.0516436	0.0568725	0.0684387	0.131708	0.0639928	0.13405	0.130848	0.152216	0.194152	0.139298	0.236254	1.00931	0.13618	0.0674111	0.0735296	0.20514	0.25285	0.133529	0.131306	0.0877357	0.0497718	0.142753	0.0735263	0.0613386	0.138483	0.068347	0.131668	0.073637	0.0673276	0.137503	0.0422382	0.630305	0.861858	0.0298965	0.271125	1.44865	0.11082	0.106498	0.299041	0.0714608	0.137444	0.144166	0.18623	0.090637	0.123333	0.0639959
ENSG00000021762	2.8124	2.07018	2.80832	2.45046	2.39044	1.98985	2.11664	1.98187	2.36298	2.46811	2.74412	1.35533	2.27662	0.793459	1.98467	2.31272	3.0092	1.85123	1.92476	1.96024	1.84122	1.45346	2.44785	1.38135	2.54845	2.1929	1.80446	2.33068	2.02987	2.34466	1.11552	2.75829	2.00022	2.00522	1.86774	1.8488	2.28265	0.463853	2.21305	1.5188	2.50491	1.74835	1.93322	2.26081	1.38845	1.64776	2.60575	2.87548	2.20991
ENSG00000150750	1.32026	0.152876	0.180701	0.360415	0.0408235	0	0.320266	0.0572328	1.07071	0	0.279585	0.223606	0.189094	0.329361	0.0206043	0.334147	0.206206	0.0540449	0.996565	1.88119	0.407434	0.0426535	0.60169	0.414098	0.238321	0.188978	0.567208	0.0129107	1.40912	0.132145	0.111163	0.516158	0.256616	0.184384	0.0641589	0.025335	0.942371	0	0.202022	0	1.15732	0.208427	0.392461	0.743907	0.386124	0.270877	0.327179	0.394672	0.0231674
ENSG00000156076	0	0.0711625	4.32103	3.91892	0	0.417141	0.0106943	0.0196715	0.0419063	0	0	0.0720189	0.0993162	0	0.260185	0.0127	0.0910655	2.01779	0.451747	0.0472728	0.0216162	0	0	0.347281	0	0	3.04466	0.168008	0.0697875	0	0.0291062	0.0420546	2.7632	0.478324	0	0.0511082	0.579535	0.186929	0.0434777	0	0.577783	0.00758708	1.86756	0.0667528	0	0.0635634	0	0.0170099	4.46628
ENSG00000160867	1.49079	0.76854	1.32446	1.5486	0.733329	0.395986	0.475488	0.374303	1.07591	0.964356	0.547152	1.31088	1.43491	1.26503	0.932145	0.0582331	0.619906	0.731538	1.74597	0.170218	0.231386	1.10641	1.50729	0.845712	0.645927	1.24307	2.07164	0.71701	1.12884	1.46637	1.23826	1.31509	1.52269	0.883476	0.699658	0.369348	0.373241	1.07698	0.776222	0.736927	2.37516	1.25922	2.39324	1.40217	0.901391	0.739854	0.519136	0.365005	0.860742
ENSG00000134987	2.5335	2.66643	2.75094	2.37971	3.27804	2.70745	3.21734	2.41561	2.61142	3.2276	2.25752	1.37798	2.26208	1.34461	2.6841	2.54272	3.46258	2.49726	2.82749	2.55076	1.7675	1.79691	2.27278	2.42628	2.76157	3.09262	3.14357	3.29781	3.10877	3.12263	3.03259	2.28878	2.6245	2.89061	2.05037	1.55753	3.13175	1.15813	2.8814	1.92293	3.31353	2.70571	2.31531	2.89411	2.53418	2.41114	3.19056	3.01336	2.61623
ENSG00000121060	4.32709	3.55239	4.55891	3.03587	4.19316	3.27484	3.31881	4.58537	3.41133	3.83993	3.76838	3.34803	4.06906	2.6235	3.60656	3.57904	3.11997	3.66994	3.22035	4.11465	3.39341	3.77419	2.43477	2.65994	4.32107	3.67118	3.31033	4.20087	3.18336	4.56684	4.147	3.44545	3.57772	3.38955	3.67488	3.43291	3.68694	2.54956	3.34127	2.81815	4.66227	4.01275	3.37454	3.86427	2.75703	3.58217	4.80298	4.80203	3.02142
ENSG00000197233	0	0	0.0222146	0	0.07734	0.062618	0.026734	0.0962916	0	0.0221615	0	0.118735	0.0632087	0	0	0	0	0	0	0	0	0	0	0.0523902	0	0.0364342	0	0.0328031	0	0	0	0	0.0222812	0	0	0	0	0	0	0	0.0593168	0.018997	0	0	0	0	0	0.0835581	0
ENSG00000172197	0.990048	1.18676	5.09189	2.16312	1.9922	1.68904	2.56565	4.69177	1.59597	1.09073	1.1578	0.211199	3.06769	0.0693125	1.98774	2.02068	2.12239	2.92071	1.36461	3.06807	1.96688	2.6693	2.19215	3.30082	2.58661	1.87675	2.71273	1.35489	3.62137	2.24066	3.50033	1.47527	2.88733	2.13361	2.30013	1.86461	2.42637	0.160127	2.16775	0.295474	4.41264	2.11099	2.75138	2.43896	0.673983	0.212319	1.68133	2.23819	2.19106
ENSG00000130545	3.1678	3.83251	3.68099	2.55421	2.87858	2.89095	2.73448	4.06823	3.58892	3.61122	2.20027	4.67477	3.30998	5.24713	3.27625	3.14593	2.9461	4.64219	4.66294	4.08635	3.59067	3.72704	3.05023	3.47658	3.05561	2.14903	2.74575	3.01852	2.94876	3.25445	4.15943	1.37445	3.73376	3.32366	3.76166	3.68714	3.68901	5.7944	3.36707	3.24065	4.35288	2.9518	3.84548	3.68782	4.23229	5.24222	2.71207	3.5721	2.71969
ENSG00000132953	1.58764	1.88128	3.03685	2.03639	2.21144	1.65854	2.16407	2.5385	1.30649	2.41417	1.24431	0.794899	2.02566	0.826704	1.93027	2.60308	2.17657	1.88921	1.23857	2.6596	1.18154	1.7211	2.15255	2.25519	2.07294	2.05563	1.53717	2.55697	1.84151	2.1458	2.5994	2.32303	1.96301	2.0513	1.36518	1.65023	1.71803	0.413638	2.00612	1.04032	2.19507	1.99836	2.2747	1.65139	1.66618	1.49139	2.691	2.15264	2.35839
ENSG00000100012	0.0135997	0	0.0171686	0.00839356	0	0.0163646	0	0	0.00913376	0.00573178	0.00723116	0.015826	0.0409544	0.373263	0.0270518	0	0.0121028	0.0298819	0	0	0.00702255	0.0558682	0	0	0	0	0.00786099	0	0.00768353	0.0150954	0.00947245	0.00550687	0.0115029	0	0.0214226	0.0167187	0.00589911	0.0542613	0.0212438	0	0.0154888	0.00490934	0.123574	0	0	0.0139359	0	0	0.0228662
ENSG00000112697	4.22668	4.51483	5.18746	5.25637	5.12833	4.36202	4.59838	6.44716	4.76397	4.64701	5.32503	2.31466	4.68402	3.61726	5.13927	4.78809	4.97326	4.87916	5.34274	5.28442	5.17665	4.42933	4.97439	5.71845	5.15028	4.73219	5.20347	5.15199	5.99145	4.92557	5.2903	4.45283	4.67842	5.60426	4.57868	4.64158	5.92439	3.85036	4.51965	4.45751	5.4705	5.21734	4.89042	5.12567	4.03799	5.39145	4.81371	4.53485	5.80553
ENSG00000134463	0.172515	1.79608	0.637148	0.969839	0.120425	3.7079	0.164724	3.41562	3.25546	0.214333	1.88252	3.02132	0.641499	0.301417	1.72615	1.38396	0.390338	3.46668	0.428528	0.46367	0.690206	3.67234	2.31839	0.0783398	1.19393	1.5935	0.998835	3.09428	2.23182	2.89284	3.71431	2.65584	1.49831	2.82833	0.104655	2.83702	0.504876	0.201538	2.84643	2.02305	3.0906	2.91076	0.976001	1.41576	2.53717	3.71578	0.221456	3.50914	0.192623
ENSG00000015285	1.25351	1.66957	1.75524	3.47465	1.52294	1.83635	1.14153	1.48308	3.33579	1.48255	2.33428	2.41794	2.84656	1.75019	1.6675	1.01439	2.91798	1.57693	2.13349	2.0674	2.48779	0.922939	2.72841	1.51138	3.9388	3.05233	1.21913	2.12196	1.89182	2.22941	4.39336	2.9094	2.94707	2.96276	0.415446	1.44438	2.28961	1.37408	1.33857	2.75885	2.34624	1.79926	2.42629	2.46504	1.90781	1.4966	1.74591	3.05744	0.957654
ENSG00000116663	3.60051	4.31712	3.01121	3.6528	4.28929	2.98167	3.09418	3.20782	3.78335	3.75795	2.58262	3.5632	3.3022	2.56662	3.02672	2.20386	5.7862	3.4769	3.6431	3.62172	4.82168	3.1613	4.21924	3.35249	4.34097	4.16793	2.17801	4.36837	3.77517	4.67531	3.83633	3.03998	3.80753	3.65836	3.81781	3.0046	3.68567	3.21242	4.16689	3.83993	3.00539	3.39052	3.18214	3.29856	2.94565	2.899	4.56941	5.19951	2.05891
ENSG00000138658	0.600659	0.34815	0.855431	0.653426	0.826312	0.578666	0.8797	1.19261	0.590742	0.825466	0.270518	0.294385	0.765393	0.321653	0.427224	0.674203	0.413821	0.935758	0.5918	1.28934	0.421893	1.21827	0.469986	0.35327	0.302188	0.688294	0.846456	0.551161	0.476207	1.02342	0.976378	0.342292	0.568694	0.835952	0.507294	0.985695	0.332109	0.312227	0.350022	0.426751	0.891923	0.602627	1.00548	1.09104	0.177465	0.710743	1.24633	0.544146	0.838813
ENSG00000189376	2.1614	2.12665	2.1163	2.36212	2.32464	2.25104	2.09212	2.20085	2.65529	2.45738	2.48629	3.30641	2.19621	3.33368	1.97189	2.21968	2.56762	2.4045	2.40105	1.4527	2.68892	2.62958	2.5769	1.98233	1.82907	2.3371	2.23244	2.10201	1.82262	2.58439	1.8604	1.5679	2.55707	2.23477	1.84753	1.9853	1.79493	2.82948	2.1823	2.59794	2.26974	2.22167	2.23411	2.35118	1.99321	2.12843	2.18564	1.59488	1.84856
ENSG00000204580	5.20601	5.39299	5.58487	5.11891	6.17118	6.38091	5.48993	6.47822	5.74809	5.21757	5.01028	3.32514	6.31146	3.76605	5.32153	6.00458	4.96184	5.35677	5.82711	6.48321	5.54041	5.07525	5.59719	6.17471	5.96729	5.22018	6.37885	4.61407	5.56861	4.38499	5.23344	3.95962	5.51592	5.38946	5.77935	5.68178	5.81334	3.71003	5.40954	4.41698	6.62064	6.0749	6.40487	5.41749	4.68566	5.83599	6.0047	5.29466	8.04529
ENSG00000113361	0.541431	0.367559	1.46805	0.883072	0.349131	0.0988066	0.208062	0.206182	0.410213	0.208505	1.05105	0.185337	0.80155	0.0800584	1.26903	0.607369	0.140391	0.327855	0.738867	0.564576	0.560748	0.192982	0.0820795	0.202334	0.695059	0.832235	0.516066	0.924312	0.726113	0.202827	0.242729	1.03972	1.00313	0.591204	0.243311	0.214597	0.502912	0.0456295	0.213482	0.258099	0.68853	0.271154	0.386224	0.43648	0.243927	0.138193	0.547741	0.342228	0.552309
ENSG00000066336	2.0481	2.8794	2.82576	4.79416	2.78672	3.50599	2.11988	1.81956	4.71263	2.95846	3.54539	2.95544	3.88899	2.90842	2.53405	2.29757	4.923	2.38923	2.95257	2.95616	3.74008	1.38283	4.00407	3.14369	4.85142	4.62079	2.76429	2.98762	2.9041	3.29808	5.01564	4.06715	3.75716	4.86857	1.17507	2.46717	3.67996	2.76348	2.35458	3.96198	2.9781	2.95811	3.12409	3.50835	2.98744	1.93291	3.26489	3.93421	2.01623
ENSG00000182405	0.356946	0.234571	0.917395	0.282829	0.755161	0.518943	0.236989	0.813259	0.56071	0.207113	0.40675	0.322545	0.564186	0.111194	0.34484	0.363536	0.183128	0.603524	0.320152	0.644015	0.605705	0.461872	0.404591	0.580394	0.301488	0.373112	0.527991	0.40352	0.640737	0.319213	0.753675	0.556155	0.638363	0.549705	0.439748	0.525162	0.329408	0.306965	0.355478	0.252777	0.731842	0.485776	0.608963	0.505651	0.261652	0.532381	0.838879	0.310325	0.489722
ENSG00000197782	0.638801	0.642786	2.02286	1.05504	1.16258	1.014	0.671108	1.45055	0.795264	0.55949	0.93333	0.799046	2.54916	1.26865	0.848095	1.31032	1.10149	1.05586	0.822658	1.07147	0.76513	0.981966	0.884117	1.25942	0.949533	0.97384	1.10083	1.04822	1.20344	1.04154	1.66044	0.742455	1.18438	1.09082	0.654398	0.818184	1.0944	0.475471	0.855056	0.890152	1.2622	1.46817	0.894383	0.701303	0.664461	0.597309	0.99271	1.11627	0.598219
ENSG00000179774	0.0334281	0	0.0282196	0.212701	0.0977508	0.135954	0.0506247	0	0.150603	0.042025	0.0354451	0.0388569	0.0405505	0.12365	0.0820999	0.0202667	0	0	0.0472601	0.0626923	0.0173188	0.102044	0.0163359	0.277204	0	0.0232961	0.390691	0	0.179085	0.0186575	0.176872	0	0.0832987	0.127633	0.0524513	0	0.13935	0	0.0348863	0.139474	0.093272	0	0.0158786	0	0.187526	0.0342486	0.0269298	0.0136239	0.36733
ENSG00000186951	1.38918	1.29565	2.30026	1.52547	1.65861	2.08947	1.13545	2.00852	2.26398	2.15361	1.25761	0.646573	2.51811	0.592284	1.87461	1.86564	0.925039	1.41883	2.08784	2.653	1.27807	1.24845	1.2993	2.05055	2.05035	1.47731	2.24153	2.10318	2.42959	1.88427	2.12269	1.82383	1.77963	2.53428	1.51352	1.14483	2.10832	1.29052	0.582434	1.01982	2.05554	1.65353	1.91524	1.313	1.49959	1.82555	1.40235	1.85372	2.07164
ENSG00000101425	0.0220713	0.0114681	0.0223165	0.0695474	0.0393668	0.0680212	0.0090078	0.00416224	0.195006	0.00745927	0.0600899	0.040859	0.0320965	0.0112767	0.0220545	0.0578828	0.0390325	0.0156417	0.0125833	0.00336721	0.0451211	0.0545867	0.00431534	0.00890573	0	0.118555	0.0254351	0.022052	0.00500727	0.0437887	0.0123225	0.0701141	0.0480658	0.314214	0.00700893	0	0.0191162	0.0759675	0.00925944	0.0109648	0.0547129	0.0063895	0.0414018	0.0143071	0.00525851	0.00908869	0.103462	0.00718398	0.0345968
ENSG00000204947	0.379736	0.466312	1.18435	1.72813	0.582216	0.440424	0.150439	0.595889	0.787119	0.400922	0.598546	0.106627	0.657966	0.124068	0.430696	0.491626	0.398393	0.646671	0.57544	0.366041	0.643709	1.35574	0.444788	0.772846	0.454	0.530412	0.481561	0.682756	0.959278	0.688238	0.84674	0.647196	0.407159	0.913572	0.611281	0.537665	0.402266	0.122803	1.13662	0.0974058	1.04003	0.349712	1.17169	0.296444	0.52066	0.727475	0.696159	0.583934	0.984603
ENSG00000170100	0.669827	0.497302	0.611397	0.544808	0.926327	0.711551	0.600038	1.24126	0.970577	0.889422	0.744986	0.472052	0.768579	0.462485	0.859902	1.0088	0.361414	0.565705	0.812578	1.22431	0.590515	0.872424	0.284839	0.302542	0.685839	0.737082	0.655547	0.935711	1.14479	1.2126	1.18225	0.967623	0.949502	0.435284	0.826106	0.783669	0.536055	0.740224	0.548663	0.542898	1.47233	0.54234	0.393787	0.916732	1.06713	0.81048	0.843218	0.511993	0.761807
ENSG00000121335	0.0138903	0.379067	0.0462946	0	0.0138472	0.0816985	0.0141072	0.01302	0.0550915	0.0232772	1.46226	0	0.205323	0	0.0138797	0	0.2291	0.0365435	1.29141	0.0519427	0.0143104	0	0	0.463486	0	0	0	0.0173269	0.0311393	0	0	0.0443967	0.0234029	0.279515	0.0218791	0.251566	0.223314	0	0	0	0.0622633	0.0199545	0.477995	0.0223833	0.0164361	2.48043	0	0	0
ENSG00000121064	5.60716	4.71588	5.74579	5.97718	5.15845	5.98894	2.2983	6.32572	5.28595	4.09971	4.95108	3.48582	6.02664	3.25687	4.54834	5.40994	5.20382	4.5857	4.50017	5.34131	6.56757	6.07274	5.05321	5.71759	4.1347	4.33156	6.44107	4.22518	5.39856	4.52821	5.78109	4.37728	4.54639	5.49621	4.02265	5.08791	5.55385	3.33588	3.88493	4.24171	6.31439	5.1459	5.50211	5.28849	3.58428	4.29098	4.9881	4.25541	7.05906
ENSG00000163069	1.63094	1.90642	3.21998	3.6502	2.43555	2.71831	2.84334	1.73254	3.12865	2.82676	3.64423	1.29818	2.28518	1.79062	2.81057	3.91004	0.84949	1.78713	2.46997	1.72693	3.17151	2.06248	2.02216	2.18161	3.17494	3.33917	2.99181	2.88752	2.7006	2.73443	2.06451	4.85192	2.41141	3.39845	1.69263	3.10147	3.07777	1.22316	1.4869	2.18862	2.68941	2.48829	2.44842	3.04621	1.37684	2.2646	2.91809	2.70279	2.702
ENSG00000145321	0	0	0	0	0	0.0250996	0	0.00981558	0	0	0	0.0716353	0	0	0	0	0.0185774	0	0.00992007	0	0	0.0217441	0	0	0.0259935	0	0	0	0	0	0	0	0	0	0	0	0	0	0	0	0	0	0	0	0	0	0	0	0
ENSG00000166819	0.095623	0.00567548	0.070452	0.0321235	0.0388929	0.0621499	0.0461151	0.622366	0.166767	0.0219935	0.101264	0.103647	0.180574	0.0655827	0.00657083	0.0275783	0.0116774	0	0.0551123	0.0442688	0.0135189	0.156103	0.00638943	0.512608	0.0325258	0.491687	0.102715	0.020433	0	0.00730107	0.0272458	2.49507	0.0812295	0.0907159	0.0511348	0.0320855	0.0113603	0	0.0204994	0.0162169	0.254157	0.00945723	0.312163	0.0211485	0	0.0267685	0.0105566	0.00532567	0.0220654
ENSG00000179097	0.0315326	0.0539892	0.0973778	0.0671535	0.0236404	0.0285149	0.0787602	0.0368666	0.0212209	0.0133377	0.0901483	0.107291	0.057011	0	0.200432	0.0704028	0.0141088	0.0279064	0.0735729	0.116011	0.0324804	0	0.00772275	0.00798084	0.105441	0.0859441	0.0452593	0.225317	0.104006	0.0175945	0.0436783	0.111438	0.091353	0.0125254	0	0.0291291	0.119072	0	0.0329091	0	0.0966049	0.0171085	0.014973	0.0255346	0.0646045	0	0.0253996	0.0128464	0.0441303
ENSG00000238269	0.0954892	0	0	0	0.184507	0	0.0969382	0.0896623	0.186067	0	0.149144	0.213356	0	0	0	0	0	0.240555	0.0460063	0	0.0499846	0	0	0	0	0.0669773	0	0	0.0546136	0	0.251413	0	0	0	0.0759311	0	0.0420876	0	0.0995632	0.225665	0	0.0350992	0.0903277	0.0776479	0	0.0977824	0	0	0
ENSG00000143756	2.89202	3.12941	3.89338	3.01682	3.40116	2.67564	3.00717	3.88194	3.14101	3.63279	2.46368	1.93648	3.30996	2.1024	3.02823	3.30583	3.27112	3.78373	3.50849	3.75491	3.40227	2.40962	2.85888	3.64605	3.40221	3.05565	2.70632	3.50027	3.55195	3.41295	3.31424	2.81132	3.35371	3.60002	2.73399	2.95547	3.39855	2.73804	3.08761	2.49227	3.69032	3.33983	3.25017	2.95402	3.30327	3.33466	3.13099	3.16758	3.21035
ENSG00000167004	7.29435	6.76981	6.80772	6.84143	7.20149	6.38061	6.77182	7.07141	6.92347	6.64771	7.28958	6.38934	6.46522	5.69678	6.69528	7.4595	7.08712	6.33221	7.06057	6.72686	6.84066	6.7568	7.47668	7.78573	6.51774	6.69659	6.95137	6.20163	8.00973	7.35996	6.36284	6.32402	6.90458	7.03928	6.52444	6.90887	7.04399	6.58542	6.33859	7.43779	7.5605	7.65211	7.23749	7.13261	6.04828	6.77832	7.56944	6.82484	6.88599
ENSG00000197498	3.50848	3.44459	3.44955	3.10288	3.62063	1.92881	3.77179	3.54191	3.115	3.63219	3.29683	4.59752	2.93201	4.55191	3.19369	2.93074	3.39294	3.4003	3.4576	2.9279	2.95577	3.0259	3.46836	2.80736	3.46734	3.12256	3.5479	3.49352	3.34792	3.43743	2.50326	3.06253	3.79046	3.39346	2.97585	3.73763	3.32366	3.78817	3.04286	4.64353	3.60044	3.24214	3.61381	3.60895	2.48922	4.006	3.31595	2.99801	3.70114
ENSG00000157500	1.6375	1.9621	3.36438	3.14366	1.70686	2.40482	2.46644	2.84819	2.4275	1.81011	2.51434	1.10749	3.11043	1.91749	2.85505	2.91609	3.04487	2.58992	2.27924	2.82158	2.31389	2.65076	2.55497	2.9133	2.54391	2.30436	2.80649	3.43995	3.1441	3.08229	3.40968	3.64488	3.34689	3.37063	2.11854	2.26312	2.75422	1.90872	3.23672	1.8913	3.48443	2.41895	2.71758	2.32715	3.24041	3.23065	2.65653	3.13831	2.66366
ENSG00000151461	3.01616	2.84719	2.99359	4.01206	2.59639	3.37598	2.5151	3.51592	2.89538	2.36537	2.81999	1.72484	2.86517	1.66175	2.93219	3.19464	3.43948	3.48875	2.50627	3.2069	2.22372	3.21179	2.9163	2.82883	2.34243	3.22691	2.72427	3.95693	3.39032	3.45137	3.60042	3.28119	3.22281	3.27409	2.84385	2.518	3.01569	2.04055	3.25088	1.68553	4.06108	3.63711	2.80536	3.1043	2.84143	3.04197	3.49797	3.13846	2.93893
ENSG00000123572	0.00261182	0.00675079	0.560588	0.272188	0.0129716	0.0094153	0.0132153	0.00733032	0	0.0109462	0.18217	0.0360789	0.274217	0.102707	0.0487967	0.0327566	0	0.00921309	0.014779	0.0216302	0.131223	0	0.025178	0.0311612	0.374271	0.167767	0.137962	0.00488899	0	0.00579477	0	0.26361	0.0327679	0.192833	0.00823471	0.00961948	0.460764	0.00703544	0.00272703	0	1.15888	0.084061	0.0413643	0.0539056	0.00617883	0.0106769	0.0291216	0	0.0548008
ENSG00000124107	10.085	11.2332	9.31408	10.262	8.01725	8.6781	8.62795	7.82645	9.09809	9.39439	9.72711	11.4613	8.34615	8.99443	10.737	5.11131	9.52296	9.94257	10.2019	9.20597	9.89108	10.6788	7.86657	6.37718	7.9298	6.92485	6.52463	10.8635	9.09051	8.12516	6.84966	7.93995	9.26433	7.87266	9.66464	10.6339	6.52684	13.0622	10.4651	10.2545	8.01046	8.74103	5.82612	9.40561	10.1751	10.9361	9.30694	10.1577	4.9879
ENSG00000142856	1.08521	1.33278	1.28721	1.48796	1.3642	1.30656	2.19917	2.07784	1.46469	1.1159	1.44337	1.54445	0.878552	1.37245	0.953575	1.52478	1.64666	1.43853	1.37405	1.98274	1.63016	2.94418	1.43189	0.933092	1.3439	1.18055	1.20944	1.10358	1.40309	1.89834	2.14155	1.21191	1.27224	1.24748	1.32522	1.70846	1.55091	0.716282	1.31791	2.05275	1.27042	1.26291	1.29054	1.64201	1.09526	1.83436	1.83569	1.02984	1.2287
ENSG00000198113	0.863659	2.78192	1.70123	1.91735	3.82427	0.990765	4.42957	2.78364	1.88882	5.03162	2.95404	1.12983	2.28845	0.707754	1.81032	3.15413	4.02769	3.84605	3.16297	4.38521	2.82813	2.54545	3.42316	1.18419	3.5874	3.19269	0.781489	1.82623	2.5698	3.84273	2.17241	2.42404	2.1674	1.4204	4.65167	3.55472	2.9156	2.73995	3.13297	1.66584	1.44639	3.94856	0.967597	3.99673	3.9511	4.388	4.79683	4.31693	0.990996
ENSG00000125686	2.789	2.69378	3.99261	2.83373	2.73029	3.32583	2.95229	2.94721	2.47694	3.25914	2.34994	1.73143	3.33172	1.66092	3.08075	3.30751	2.73965	3.2872	2.70044	3.46653	2.05072	2.31209	3.04712	2.41403	3.16029	3.25188	2.82274	3.40512	3.33625	2.79867	3.39011	2.82361	3.68449	3.23449	2.89683	2.5015	3.34027	3.56374	2.5443	1.3987	3.82745	3.23989	3.50239	2.96495	2.55775	3.29761	3.44257	3.15823	3.40259
ENSG00000147571	0	0	0	0	0	0	0	0	0	0	0	0.143706	0	0	0.016116	0	0	0.0142648	0	0	0	0	0	0	0	0	0	0	0	0	0	0	0	0	0	0	0	0	0	0	0	0	0	0	0	0	0	0	0
ENSG00000161594	0	0	0.017687	0.0257894	0.0104881	0.0376592	0.0212921	0.0486444	0.0555628	0	0.0332274	0.118013	0.0504707	0.0527707	0.0518143	0.025268	0	0.0638966	0.0198635	0.0238101	0.0215981	0	0.0404643	0.0520645	0	0.0145918	0.0360933	0	0.0118582	0.0116794	0.0434059	0.016955	0.0177401	0	0	0	0.00910735	0	0	0.0763281	0.115584	0	0.13324	0	0.0370374	0.0426497	0.0168758	0	0.0581823
ENSG00000258227	0.333961	0.415193	0.653977	0.938265	0.623167	1.20508	0.546797	0.381978	1.66669	0.443842	1.5814	0.36039	0.878026	0.806068	0.592583	1.21314	1.46272	0.379375	0.834968	1.02712	1.17888	0.0976869	0.710835	0.825371	1.3154	0.694661	0.611956	1.11247	1.05995	0.915684	1.34973	0.917546	0.655564	2.97755	0.391634	0.331717	1.79414	1.0816	1.0468	0.496318	0.531337	0.989734	0.5733	1.00353	1.43382	0.321602	1.55497	1.18393	0.491893
ENSG00000244462	3.41614	3.31282	4.37012	3.93425	3.57616	3.52742	3.8579	3.71284	3.41184	3.68799	3.42029	2.14935	3.7618	2.24033	3.45004	4.39222	3.81378	3.94218	3.36698	4.0456	3.50229	3.2911	3.61421	3.95899	3.95183	3.84958	3.55866	4.03841	4.28785	3.95753	4.109	3.25945	4.10573	4.10625	3.26878	3.56437	4.08313	1.02144	3.33543	2.7936	4.2791	4.55137	3.53322	3.67436	3.57663	4.26037	4.12736	3.87495	4.06651
ENSG00000150593	5.36262	4.91628	4.57105	4.69324	4.83882	4.95678	4.67528	5.42568	4.42361	3.39569	3.9932	3.36006	4.62519	3.11525	4.31302	4.33474	5.32908	4.43696	4.43835	4.15457	4.58588	5.47514	3.42103	3.41376	4.47412	4.35708	4.51794	4.79751	5.36158	4.19932	4.82505	3.47676	4.72168	3.83202	3.18085	4.93752	3.85799	2.89883	5.50748	3.85878	4.42037	4.9371	3.66593	3.5715	4.41001	4.65674	3.66062	5.1601	3.83133
ENSG00000086619	0.473298	0.510301	1.59213	1.26983	1.09451	1.18301	0.529739	2.85052	1.48365	0.724912	1.24691	0.707585	1.83092	0.374573	0.769631	1.23466	1.11285	0.51211	1.1543	0.801587	1.75866	0.419248	1.1907	1.6735	1.39122	0.712069	1.35851	0.821951	2.4913	0.454303	2.51299	1.08652	1.21299	1.85192	0.192954	0.450326	0.604755	0.574188	0.773568	0.908188	2.13989	0.789931	1.99346	0.901565	0.560888	0.675262	1.08293	0.661293	0.9195
ENSG00000184898	0.486291	1.04469	1.52656	1.6439	1.84324	1.78079	1.51606	1.41008	1.59084	0.980959	1.08133	0.434225	1.06123	0.393452	0.99432	1.44831	2.27113	0.898877	0.873725	1.19734	1.34393	0.71712	1.12134	1.49216	1.33536	1.63428	0.976268	1.50208	1.52947	1.0063	1.57268	1.2151	1.37026	1.79607	0.904025	0.708054	1.55937	0.0630125	1.89027	1.19667	1.89691	1.54944	1.18546	0.873482	1.15587	0.759968	1.6344	1.3014	0.933409
ENSG00000172324	0	0	0	0	0	0	0	0	0	0	0	0.257462	0	0	0	0	0	0	0	0	0	0	0	0	0	0	0	0	0	0	0	0	0	0	0.0377307	0	0	0.154644	0	0	0	0	0	0	0	0.0487739	0	0	0
ENSG00000100271	1.29161	1.03138	1.47949	2.51527	1.68023	2.13899	1.23874	2.23232	2.75976	1.12139	1.70602	1.18304	1.9435	2.1967	1.39791	1.09979	1.80228	1.4703	1.87853	1.31077	2.10119	1.20316	1.11501	1.16022	1.83254	1.84939	1.39853	1.30684	2.19145	1.86094	1.61798	1.80362	1.48228	2.6022	0.645199	1.48874	1.55128	0.93337	0.724577	2.24189	3.03761	1.35002	1.74441	1.1284	1.07322	0.952416	1.03723	1.497	1.92577
ENSG00000188710	0.286535	0.160081	0.472914	0.0367243	0.357945	0.324268	0.290606	0.39366	0.603278	0.28673	0.107968	0.101793	0.188973	0.6284	0.170503	0.515365	0.103594	0.473416	0.34202	0.326224	0.104956	0.232004	0.191953	0.262561	0.143308	0.195739	0.713482	0.242363	0.24946	1.34125	0.607792	0.161291	0.999446	0.0922824	0.240959	0.018457	0.172142	0.734045	0.245753	0.142152	0.966333	0.429124	0.459847	0.401927	0.275772	0.448427	0.506369	0.225756	0.509488
ENSG00000161996	1.26977	0.680248	2.56335	1.02775	1.65255	1.5827	1.42182	2.23936	1.94694	1.38017	0.877315	1.1603	2.07109	1.20375	0.696289	0.911885	0.866439	2.68591	1.39663	2.08186	0.888909	2.77227	1.33886	1.19935	1.14284	1.19818	1.64781	0.831424	0.533574	2.3344	2.18166	0.789736	1.62459	1.05566	1.44459	1.73926	0.6792	0.35851	1.44785	1.83717	1.74075	1.37069	2.33864	1.91272	0.740608	1.62884	1.7122	1.24431	1.87151
ENSG00000141639	0.0389776	0.0309142	0.0356236	0.0673668	0.0860024	0.050653	0.00334019	0.0214363	0.265442	0.0219734	0.0781931	0.0600809	0.00798552	0	0.0453384	0.011873	0	0.00870403	0.0550625	0.0148941	0.0202127	0.0136609	0.02222	0.0519501	0.0284739	0.0843681	0.0411913	0.00410604	0.0438777	0.191472	0.0136747	0.548529	0.0357298	0.252069	0	0.0634157	0.0365653	0.0566099	0.00343369	0	0.591835	0.0258361	0.156018	0.132112	0	0.00673264	0.0105469	0.0159038	0.0401623
ENSG00000144460	0	0.00446538	0.0345265	0.0807265	0.0154191	0.00622979	0.0104913	0.0288528	0.145363	0.02591	0.00548959	0.0706796	0.0187875	0	0.0205704	0.125744	0	0.0931404	0.493982	0.0501854	0.00533113	0	0	0.00519554	0.0128776	0.0285134	0.0119115	0.0224815	0.149766	0.017167	0.0496099	0.238659	0.0346296	0.0561639	0.0403664	0.0866523	0.149002	0	0	0	0.0578958	0.01115	0.0855137	0.0412905	0.0303723	0.0210937	0.01657	0.0413627	0.011611
ENSG00000115592	0.0944218	0.12997	0.0558321	0.0274827	0.0148884	0	0.0226924	0.0886581	0.0199946	0	2.16109	0.932737	0	0.00952026	0.464165	0.158569	0	0.0197678	0.0141482	0.0281666	1.08438	0	0.489957	0.0149963	0.584845	1.09392	0.962328	0.0506596	0.01683	0.00831207	0.0104038	4.16624	0.0861929	0.0580556	0.0235194	0.69697	0.419672	0	1.13076	0	0.0338183	1.08391	0.372691	1.03048	0.0176708	0.0153038	0.342155	0	0.853925
ENSG00000198301	2.75998	3.31369	3.29912	3.26976	3.49547	2.81899	3.54274	3.69877	2.7721	3.65195	2.89484	1.30442	2.89088	1.99438	2.68856	3.63382	3.58662	3.94167	3.07242	3.53331	3.104	2.86121	3.17602	3.17362	3.13539	3.58587	3.25082	3.56197	3.67809	3.36973	2.88492	3.34728	3.80023	3.48288	2.98592	3.39606	3.06503	1.87485	2.64638	2.23667	3.1565	3.16663	2.95098	3.20907	3.21411	3.50302	3.5868	3.59909	2.94374
ENSG00000170903	1.25275	1.55334	2.40618	2.25973	1.74305	1.45386	1.70206	1.54439	1.65788	1.56813	1.70675	0.613785	1.89008	0.970788	1.90958	3.20109	1.80589	1.46623	2.34224	1.77753	1.9644	1.65681	1.26489	2.04573	2.01281	2.07192	2.0456	1.44965	1.79552	1.31866	1.78988	1.99181	2.82022	2.79548	0.935384	1.63968	1.91885	0.615122	1.65375	0.73484	3.02311	2.09839	2.35966	1.54429	1.13699	2.35308	1.9897	1.71264	2.76237
ENSG00000249115	1.72708	1.7532	2.84995	1.82699	2.39484	3.48511	1.7562	2.67665	2.51757	2.3922	1.52177	2.35276	2.75546	2.60515	1.39084	2.53506	1.93636	2.48262	1.88869	2.96056	1.90034	3.63553	2.00434	2.02688	2.01769	2.69033	2.60577	1.89913	1.85635	3.07464	3.09277	1.85251	1.94753	1.67129	2.04659	2.5307	2.0985	1.37845	2.03612	2.67714	2.88678	2.74374	2.6567	2.48585	1.94479	1.89734	2.07533	2.07656	2.50532
ENSG00000064932	4.03435	4.29833	3.99431	3.71499	4.81329	5.25342	4.31162	4.8913	4.50406	5.4447	4.50129	3.79919	4.6219	3.5186	3.54639	4.32708	4.70015	5.27887	4.45571	5.22248	4.53071	3.45548	4.1343	4.20697	4.54048	4.11788	3.41936	5.00214	3.872	4.2843	5.21164	4.36521	4.48251	3.27342	4.88964	3.98195	3.42643	3.64527	4.63597	4.94369	4.00709	5.40709	4.25136	4.92949	5.33687	4.66882	5.21583	5.20043	4.21188
ENSG00000104870	3.8676	3.31186	3.88626	4.81694	2.92149	3.35155	2.31899	2.80948	4.83942	3.64264	4.20684	4.20305	4.07706	3.98478	3.73413	3.54373	3.49458	2.29983	3.48648	2.95909	4.2347	2.61577	3.64038	2.76771	4.71589	4.87204	3.57594	2.91182	4.23143	3.4496	4.4862	4.53499	4.08327	4.36721	2.65502	2.38417	3.86776	3.57497	2.23604	4.15975	4.35547	3.9823	4.29428	3.96211	2.55912	2.62168	3.00778	3.22633	3.94549
ENSG00000118579	2.23098	2.02277	2.24371	2.49862	2.23951	1.95761	2.22759	1.8972	1.97832	2.16697	2.12945	1.30116	2.14375	1.64179	2.07878	2.37668	2.09827	2.51292	2.29275	2.40889	2.81554	2.59001	1.77211	2.35766	2.18322	2.01301	2.09894	1.6359	2.72672	2.02806	2.25875	2.12388	2.14067	2.18279	2.44384	2.04058	1.94465	1.78403	1.62358	2.12537	2.31303	3.10862	2.21247	2.16005	2.20723	2.90707	2.56955	1.9406	1.80701
ENSG00000235268	0	0.0183457	0.0267972	0	0	0	0	0.00999122	0.0142785	0	0.0113084	0.024708	0.0129528	0	0	0.00644269	0	0	0.0100976	0.024123	0.0109826	0	0	0	0.026456	0	0	0.00666573	0	0	0.0725602	0.0171784	0.00901486	0	0	0.0389708	0.0183967	0	0	0	0	0.0076809	0	0	0	0	0.0170981	0	0
ENSG00000136367	0.0604873	0.054392	0.634837	0.16115	0.0626629	0.0781981	0.0174618	0.0275209	0.21796	0.0308254	0.168101	0.0946653	0.508742	0.188383	0.0862545	0.202777	0.101816	0.0971213	0.0707798	0.106459	0.11496	0.151434	0.0472326	0.112141	0.222421	0.121699	0.0991445	0.11844	0.165653	0.143543	0.162369	0.178109	0.241715	0.243463	0.0460902	0.0537235	0.148189	0.0329515	0.243912	0.0831532	0.49759	0.069445	0.420075	0.0890451	0.051736	0.0300721	0.0810938	0.0721749	0.10965
ENSG00000204659	0.0315326	0	0.0527514	0.184135	0.0314352	0	0	0.0869466	0.0830728	0.078237	0.0334366	0.0724066	0.111854	0.357488	0	0.0379752	0	0	0.143575	0.116011	0.0953265	0.452583	0.030646	0	0.114655	0	0	0.0197712	0	0	0.606493	0.07524	0.0266964	0	0.0494955	0	0.0273227	0	0	0.0389118	0	0.0227666	0.196677	0.0506251	0	0.0639066	0	0.0255795	0.0354116
ENSG00000173545	3.93775	3.80576	4.34445	3.75939	5.13658	4.46049	4.97767	4.89015	4.12362	4.23861	4.82329	5.23988	4.18654	5.05287	4.5117	5.23457	4.3946	4.64724	4.14403	4.28946	5.17919	4.95256	3.61107	4.60367	4.64537	4.77855	5.26569	4.05374	4.072	4.12628	4.396	4.88565	3.6941	4.4979	4.26838	4.16491	4.66719	6.16375	4.27958	6.18556	4.88357	5.24019	4.55996	5.27628	4.06343	4.94092	4.4492	4.49434	4.70903
ENSG00000162601	1.45156	1.02728	1.8869	1.36639	2.15241	1.92171	1.8112	2.47442	1.9213	1.51759	1.98371	0.19491	1.51232	0.31842	1.01301	1.94824	1.5944	2.1856	1.92365	2.37952	1.69497	1.57248	1.55965	0.936578	1.19579	1.65952	1.14787	1.92396	1.53476	1.69476	2.37795	1.15422	1.82811	1.9025	1.98706	1.44723	1.27335	0.329473	2.30197	1.68858	1.73797	2.43046	1.52064	1.82402	1.52153	2.15601	2.07395	1.34821	1.85295
ENSG00000138772	2.54645	3.78281	2.27089	2.01486	2.9531	3.46157	4.48796	3.65863	3.50625	4.10255	3.64517	2.05473	0.945957	3.06487	3.04686	4.32812	3.88221	2.38236	2.73482	2.14677	4.01896	2.04744	1.78145	1.43478	1.81823	3.80672	1.13962	3.45762	3.47633	3.03977	0.142245	1.74604	3.66862	1.71931	4.49731	2.11973	1.59524	2.33535	2.80657	2.54351	2.51489	1.29288	1.92506	4.17365	3.96799	3.6253	2.93986	3.83735	2.99766
ENSG00000270099	0	0	0.0832738	0	0.0498355	0	0	0	0	0	0	0	0	0	0	0	0	0	0	0	0	0	0	0	0	0	0	0	0	0	0	0.0405037	0.123531	0.152249	0	0	0	0	0	0	0	0	0.0472465	0.155703	0	0	0	0	0
ENSG00000153976	1.10776	1.85815	0.808081	1.18705	1.49706	1.14302	1.6284	1.6192	1.87016	0.490625	1.00615	1.01056	1.21189	1.64	3.0862	0.446257	3.27462	1.03983	1.77104	2.45999	1.47255	1.13554	2.28115	1.91729	1.60916	1.2199	0.242172	0.653449	0.562044	2.95307	1.66725	0.580859	1.44861	1.29784	2.53502	0.090834	1.15196	0.214456	2.28082	2.7424	0.893406	0.79217	1.5611	1.57736	1.17542	0.130541	0.351499	1.78098	2.29404
ENSG00000186567	4.29474	3.7535	1.74357	0.601786	2.82145	3.44446	2.26792	1.83133	3.28214	2.00158	2.92554	2.53581	1.92504	4.18545	3.36427	0.715318	3.10091	3.83635	3.08192	1.692	3.66799	2.68893	3.3668	0.890388	1.22876	1.40263	2.4269	2.98097	3.0708	1.98083	2.44067	1.3372	3.08718	2.05019	3.62807	2.56647	3.25331	3.08768	2.97987	1.58321	1.63456	3.55147	2.19513	2.07061	3.72857	2.24633	2.5643	3.43473	1.19987
ENSG00000170419	0	0	0.0105636	0	0	0	0	0.00783875	0	0	0.0132892	0.0290124	0	0	0	0.0025289	0	0	0.0353125	0.00634301	0	0	0	0	0.0104284	0.0173702	0.00964538	0.00261657	0.00472158	0	0.0116212	0.0466554	0	0.00660475	0	0	0	0	0.00437255	0	0.00952789	0	0.0313382	0	0.00495852	0	0	0	0
ENSG00000055070	5.03299	4.72879	4.41267	4.62835	5.35465	4.9323	5.30404	5.26172	5.2362	5.17743	4.85811	4.93878	4.51385	4.09068	4.8938	5.41089	4.94235	4.80662	5.50479	5.74002	5.41605	5.01066	5.21431	4.62065	5.40926	5.36089	4.65511	4.76688	5.1844	5.1048	5.54118	4.92858	5.24631	4.84342	5.38227	5.37163	5.31046	4.68038	4.97156	4.37768	4.63397	4.81439	4.21003	5.0638	4.6106	4.26756	5.42198	5.03368	4.63422
ENSG00000087495	0.223934	0.0211006	1.01382	0.034986	0.0482997	0.0147606	0.0572343	0.180587	0.0487277	0.00688666	0.0927984	0.0654379	0.885916	0.0207495	0.0759195	1.03886	0.0360663	0.0499341	0.06835	0.0246816	0.175085	0.10718	0.0158694	0.391218	0.0203485	0.055929	0.0420172	0.0379554	0.0853922	0.0884311	0.167007	0.135969	0.123007	0.0193128	0.0819379	0.0349447	1.6012	0	0.0212784	0.0301613	0.121113	3.37208	0.274542	0.0392762	0.0336438	0.089725	0.0390696	0.0457994	0.0319639
ENSG00000121957	3.02364	2.82972	2.19217	2.02005	2.78467	1.48443	4.13576	3.22762	1.59424	3.0949	2.57724	0.458541	2.38821	0.793399	2.6981	3.50984	2.3033	3.59029	2.67938	3.72583	2.89611	2.89141	2.67385	2.16204	2.73325	3.33752	1.42375	2.85849	3.27106	3.00944	3.58958	3.72618	2.33616	1.39292	3.47884	2.66634	2.02525	0.987171	2.92972	1.89274	2.35553	2.91187	1.73103	3.57294	2.51552	2.85212	2.88026	3.09958	2.12429
ENSG00000151962	0.0961544	0.0578068	0	0.0152335	0.0245698	0.00746575	0.0617777	0	0.435522	0.0462666	0.0196477	0	0.00753754	0.142932	0.0123662	0	0	0.0163852	0.233177	0.00470205	0.0190833	0.0383471	0	0	0.00773334	0	0	0	0	0.0137374	0	0.0100026	0.0208584	0	0.0194992	0.00762776	0	0	0	0	0	0	0.0405015	0.106455	0	0	0.00995576	0	0
ENSG00000144136	3.66016	3.45651	3.69302	3.72398	3.78004	3.24171	4.82537	3.29523	3.72491	2.92935	4.07141	4.26619	3.03859	3.11283	2.57162	4.20919	4.91851	3.08509	2.80927	3.56427	3.56273	3.47852	3.80958	2.89351	3.6761	3.77253	3.65351	4.10502	3.2289	4.33223	3.93949	3.33204	4.13287	3.65491	4.19013	2.50041	3.63817	3.3042	3.44826	2.67173	3.47878	3.74739	3.98766	4.41576	2.74782	3.99663	4.10269	4.04089	3.5488
ENSG00000169246	0.330466	0.062703	0.200057	0.100975	0.295475	0.168669	0.103937	0.275251	0.199072	0.0525498	0.189634	0.0245054	0.348	0	0.121931	0.0869767	0.0645978	0.0370355	0.174871	0.229949	0.125573	0.252944	0.099576	0.0625528	0.108364	0.22472	0.117505	0.0961148	0.0757497	0.102338	0.298888	0.142667	0.298665	0.266827	0.217403	0.148761	0.084682	0.00713884	0.444604	0.0195582	0.186884	0.21595	0.239475	0.229415	0.160394	0.239888	0.360379	0.103564	0.215716
ENSG00000152990	1.92592	1.34594	2.76004	2.33644	2.10795	2.37948	2.19682	2.36672	2.37715	0.756082	2.67592	0.487331	1.72689	1.16254	1.99256	2.92328	1.90774	1.95204	1.69502	1.37077	2.54368	2.74568	1.28112	2.06172	1.9778	2.14823	2.17224	1.49618	3.07857	1.68989	1.75551	2.04362	2.16167	2.13881	2.48467	1.73293	2.1185	1.09135	0.950133	1.68721	2.23643	1.88951	1.5334	2.7988	1.64201	1.71171	1.91013	1.45484	1.4761
ENSG00000140521	3.60314	2.98563	3.67544	3.78792	3.50862	3.82583	3.53674	3.39892	3.80155	3.24453	3.10389	2.18233	3.43086	2.38378	3.53868	4.06028	3.481	3.75775	3.11546	3.17323	2.97182	3.92846	3.04272	2.9053	3.30286	3.2019	3.83182	3.33376	3.83343	3.59092	3.96878	3.77816	3.59972	3.50709	4.05344	3.32642	2.91169	1.42012	3.16367	2.35641	4.43574	2.72026	4.09522	3.52272	3.24762	3.74076	4.19533	3.52318	3.58144
ENSG00000140443	3.22302	2.30248	4.02507	3.5603	3.38127	3.12214	3.69086	4.11504	3.0695	3.54181	3.49518	1.32446	3.39043	3.12362	3.24721	4.80583	3.04364	2.94947	2.8928	3.72367	2.87167	3.46605	3.4207	4.31431	3.16164	3.34808	3.58284	3.45844	4.3338	3.47867	3.1958	2.80093	3.67359	3.76043	3.25961	2.82939	3.99334	1.38068	2.94155	2.41516	3.92148	3.96021	4.41976	3.29664	3.2028	3.54536	3.58723	3.52641	3.45348
ENSG00000164220	1.8642	2.08952	4.22128	1.97437	2.00926	0.781556	2.78414	0.705286	3.38742	0.60294	3.66938	0.931515	2.5524	0.484514	3.6543	3.30423	0.712764	1.26544	1.7286	2.22193	3.1925	0.237882	1.30714	2.7882	3.97855	3.3481	2.32808	2.37977	2.61951	1.76268	1.53253	2.88946	2.01741	3.0304	1.21313	1.7826	2.98628	0.301013	1.17112	2.2495	3.41291	2.5743	1.40747	1.31025	0.330697	1.04097	2.34089	1.97532	3.85621
ENSG00000155926	0.888898	0.988262	1.61147	1.96326	0.684214	1.12737	0.994225	1.02159	2.16115	0.944213	1.6127	1.04131	1.64599	0.536943	0.826957	0.989573	2.15534	0.82287	1.22661	1.82547	2.02856	0.679234	1.84697	0.625574	2.98514	2.39041	1.02141	1.55179	1.04111	1.41405	3.45071	1.88685	1.86457	2.25772	0.438481	0.774004	1.97891	0.3788	0.810802	1.11516	1.47959	1.5163	1.32391	1.26442	1.16357	0.565132	1.00035	2.63695	0.538138
ENSG00000172809	6.97644	6.29165	5.60866	6.76115	6.26352	5.71467	6.91302	5.97962	6.15047	6.84937	6.53514	8.89997	5.81127	8.62924	5.38684	4.68367	6.62863	5.49988	6.32774	4.62906	5.94025	7.52178	6.26788	6.82403	5.68779	5.91627	6.54656	5.93225	5.82028	6.29942	5.48312	5.83728	5.86716	5.59293	5.91662	6.84979	5.37198	8.40762	5.91802	8.02447	6.28951	5.8328	6.37946	6.06543	6.71374	7.02129	5.77297	5.75922	5.80577
ENSG00000164256	0	0	0	0	0	0.00777983	0	0	0	0	0.0068559	0.0298595	0	0.103349	0	0	0	0.0170723	0.0482545	0.033956	0.00665808	0.0134374	0	0	0	0	0	0	0	0	0	0	0	0	0	0	0	0	0	0	0.00736227	0.00465437	0.0242567	0	0	0.0263085	0	0	0
ENSG00000127947	5.09294	4.1223	4.64543	4.63456	4.9911	4.44494	4.97005	3.80363	4.51893	4.31076	5.03438	2.53062	3.89683	2.79849	4.33462	4.85542	4.97278	4.71408	4.31436	4.26847	4.83786	2.92413	4.7613	3.74454	4.09982	4.51886	4.44459	4.82867	4.1243	5.24966	3.57145	3.81705	4.31169	5.05664	4.96208	3.61371	5.22913	2.90127	4.4499	3.90257	3.52481	4.75853	3.93605	4.46999	4.64167	4.45003	4.84926	4.6891	4.5147
ENSG00000173431	0	0	0	0	0	0.178642	0	0	0	0	0	0.252395	0	0	0	0	0	0.034474	0	0.0586224	0	0	0	0	0	0	0	0	0	0	0	0	0	0	0	0	0	0	0	0	0.044298	0.0281364	0.207902	0	0	0	0	0	0
ENSG00000274808	0.127084	0.0213334	0.0616349	0.040353	0.0647429	0.00996632	0.0167689	0	0.0759172	0.0681626	0.0261917	0.0381699	0.0200545	0	0.00827297	0.00998735	0.029243	0.00732041	0.106093	0.0433894	0	0.0342062	0.0080447	0	0	0.0341883	0.0190334	0	0	0.0274015	0.022917	0.0133489	0.00700083	0	0.0890013	0.0403054	0	0	0.132446	0.0102361	0.0281124	0.0237106	0.0155956	0.0655836	0.113425	0.0169191	0	0.0200252	0.0185544
ENSG00000070193	0.0247211	0.0768013	0.411548	0.475514	0.00826174	0.222229	0.0167855	0.363022	0.178044	0.0548389	0.0434349	0.075429	0.162338	0.0519358	0.104116	0	0	0.0786275	0.0234233	0.370194	0.0912563	0.0172215	0	0.0165958	0.668521	0.153184	0.0838209	0.100237	0.355403	0	0	0.833189	0.196704	0.306176	0	0.0601021	0.529697	0.011168	0.0172532	0.0102463	0.900455	0.0528627	0.156054	0.396785	0	0.145709	0.0264779	0.0785614	0.0277703
ENSG00000171467	1.5206	1.44979	3.40724	1.97911	1.77189	2.16409	2.46113	3.57577	1.87858	1.59733	1.63171	0.670607	2.82683	0.769184	2.11952	2.11996	2.13621	2.10142	1.57691	3.13827	2.14768	1.92997	3.24416	2.07218	2.74154	2.21787	2.32765	1.80211	2.5813	1.4956	2.69548	2.04727	2.61744	2.59688	2.29729	2.12911	2.71259	0.266841	1.72672	1.2086	3.30517	2.17222	2.46381	1.79471	1.17731	2.31394	2.08342	2.22512	2.82896
ENSG00000106615	4.1893	4.0254	4.46926	4.05672	4.25619	3.49923	3.96377	3.80632	4.2063	3.81096	4.06524	1.90423	3.59756	2.73224	3.59237	4.39771	3.94436	4.30853	3.39539	3.27554	4.88545	4.81855	4.10916	4.40413	3.88222	3.85268	4.76081	3.47761	4.01597	3.64558	4.31031	4.27086	4.41879	5.03233	3.76992	3.96591	3.82694	3.23262	3.63765	3.42381	3.9729	3.96494	4.66568	4.13287	3.24739	4.60372	4.53544	3.41694	4.54321
ENSG00000100302	0.821853	0.438616	1.45607	1.77049	0.896522	2.60465	0.258484	0.335734	4.83039	0.353653	3.56464	0.907871	1.21602	3.15262	1.11664	0.585075	1.11548	0.313427	1.84801	0.286429	3.407	0.398261	1.86106	2.20453	1.33482	2.61003	3.75108	0.110185	0.350698	0.480495	0.659837	1.58273	0.947215	1.63341	1.16133	0.285679	0.734837	1.44793	0.692228	0.68716	1.64983	0.49929	1.39361	0.965787	0.345903	0.235295	1.22167	0.365236	2.55499
ENSG00000185385	0	0	0	0	0	0	0	0	0	0	0	0.10927	0	0	0	0	0	0	0	0	0	0	0	0	0	0	0	0	0	0	0	0	0	0	0	0	0	0	0	0	0	0	0	0	0	0	0	0	0
ENSG00000167371	0.313528	0.0180165	0.653281	0.309498	0.771123	0.482984	0.129203	0.46215	0.54179	0.0520406	0.689762	0.109903	0.424842	0.127856	0.146297	0.113752	0.0963859	0.107341	0.203804	0.146265	0.361924	0.152271	0.43698	0.0484104	0.0765851	0.289854	0.18197	0.0683349	0.149898	0.154744	0.807042	0.0770922	0.209051	0.106523	0.157075	0.115894	0.404294	0.0280689	0.272427	0.253631	0.179879	0.0974638	0.226031	0.180643	0.0328046	0.110506	0.218961	0.0336251	0.335773
ENSG00000256683	0.819118	0.724975	0.488046	1.22775	0.319191	1.22903	0.0974338	0.508502	0.754292	0.613604	1.46674	0.600536	1.19952	0.640859	0.279587	1.15361	1.02868	0.919732	1.13144	1.74493	0.565999	1.33884	0.222912	0.0859679	1.22647	1.31395	1.59006	0.252069	1.05175	1.01335	1.61728	0.973002	0.97511	1.27714	1.02733	0.299193	0.8241	1.06903	0.484435	1.0017	1.29554	2.37177	0.930353	0.649145	0.166334	0.729429	1.05746	1.27317	0.801967
ENSG00000160949	2.70764	1.97676	2.24711	1.95473	2.41242	1.98074	1.69701	2.50218	2.77187	2.98079	1.25542	3.13022	3.03713	3.50057	1.77315	1.90974	2.47191	3.56467	2.75297	2.9726	1.12356	4.32316	2.70589	2.45162	1.61669	2.67896	2.27048	1.79398	1.49197	3.68698	3.2572	1.12565	2.66542	1.40278	2.29935	1.96459	1.09315	1.55165	2.09611	2.46885	3.06569	2.43723	2.71882	3.23953	1.8117	2.17631	2.61849	2.03714	2.04228
ENSG00000179195	3.05639	3.24301	4.55203	3.7448	4.02231	3.7545	3.58485	4.69616	3.73096	3.11228	3.62592	1.82746	4.36881	1.71849	4.3503	4.59701	3.38438	3.90291	4.04264	3.88504	3.80467	3.71486	4.16178	4.36166	3.79038	3.84218	4.64297	3.94416	4.9574	3.40706	3.79802	3.71607	5.08891	4.89539	3.85976	4.86906	4.01266	3.29853	3.85214	2.65865	4.97621	3.36919	4.97694	3.36386	3.24931	4.83976	3.64101	3.35059	4.32495
ENSG00000110324	0.908319	1.61001	1.71922	2.78759	1.19122	1.72827	0.77655	1.32728	3.14829	2.02851	1.86929	1.84708	2.53848	1.01055	1.70162	0.761679	2.72524	1.39618	1.71727	2.20721	2.35741	0.45995	2.30917	0.506191	4.14641	2.74084	1.05371	2.17798	1.77512	1.55377	3.957	2.63395	2.31385	3.0379	0.595012	1.13948	2.38524	0.90176	1.19471	1.1712	2.74221	1.47263	1.49877	1.92441	2.29457	0.951536	1.38392	2.83632	0.780682
ENSG00000134183	0	0	0	0	0	0	0	0	0	0	0	0	0	0	0	0	0	0	0	0	0	0	0	0	0	0	0	0	0	0.0199858	0	0	0	0	0	0	0	0	0	0	0	0	0	0	0	0	0	0	0
ENSG00000105397	3.09292	2.768	3.7168	3.17844	3.5885	3.29382	3.38694	3.82338	3.99752	3.37878	3.1989	2.8039	3.4319	3.14585	3.41977	3.10563	3.42075	3.52403	3.47249	3.83162	3.29641	3.91741	2.70082	2.90863	3.52487	3.47371	2.86845	2.78621	2.55103	4.81251	4.28123	3.33784	3.27182	3.41271	2.85233	3.21266	3.0645	1.77765	3.36319	3.08424	4.14197	2.91082	3.86124	3.47622	2.56925	3.53327	3.19862	3.39201	3.08349
ENSG00000147378	0.0683875	0.134523	0.0578401	0.238103	0.0458088	0.108303	0.069435	0.0849512	0.176591	0.0949288	0.163741	0.104846	0.161007	0.0582225	0.0231402	0.359748	0.193996	0	0.0219415	0.0690878	0.341156	0.265888	0.0879871	0.155411	0.0848413	0.124192	0.0266858	0.0430832	0.0768877	0.170941	0.395201	0.364562	0.0954288	0.268228	0.03641	0.0284475	0.0786124	0	0.0479454	0.378835	0.102678	0.113076	0.106208	0.210281	0.0542621	0	0.0370486	0.160783	0.149492
ENSG00000144199	0.469325	0.967754	1.25986	1.67805	2.12165	0.757607	1.56838	2.04914	1.49456	1.29695	1.135	3.78606	1.36122	2.89909	0.406608	1.68793	1.28535	1.41701	0.999835	1.01949	1.74128	0.217846	0.783876	1.72674	1.52109	1.21498	2.30438	0.925447	0.725939	0.809516	1.20495	1.79633	0.898941	1.20555	0.791416	0.936755	0.884174	2.23283	0.594837	2.76137	2.49417	1.46656	2.53894	2.21535	0.880645	1.75592	1.51835	1.24261	1.3062
ENSG00000075131	2.06989	2.00542	2.12383	2.69017	2.05342	1.18527	2.70323	2.27705	1.89495	1.64512	1.28475	1.90962	1.64905	1.99876	1.8423	1.60793	1.96798	2.26168	1.55191	1.77168	1.59654	3.43174	2.10137	1.60209	1.49705	1.87124	1.53045	1.76317	2.80725	2.385	2.55114	1.37098	2.01389	1.90035	2.40769	2.44156	1.6487	1.74529	1.46567	2.99773	2.56095	1.43272	2.5266	2.56439	1.68133	2.28441	2.40923	1.52648	1.4439
ENSG00000161267	2.74627	2.87585	2.40157	2.32147	1.88897	1.77627	1.04625	2.89637	2.39583	2.04987	1.59143	1.52366	3.62649	3.14915	2.74901	1.31402	2.21299	2.81165	2.75414	2.20624	1.7978	2.17979	3.02367	3.01075	0.972178	0.632118	3.56065	3.49773	3.07409	2.91614	2.6524	0.743958	2.58024	3.19713	2.74736	4.06707	3.09237	2.40817	3.28365	2.01685	2.8724	1.29165	1.28446	1.97055	2.76117	3.73591	2.69323	2.54547	1.89376
ENSG00000100804	7.03077	6.58976	6.60681	6.30639	6.42678	4.93962	6.33374	5.36293	6.51382	7.05525	6.27655	6.35051	6.967	7.84606	6.52673	6.25458	6.06646	6.32659	6.56561	5.94135	6.55651	6.65547	5.72512	6.80422	6.11232	6.45886	6.9102	6.22209	6.34229	6.37961	5.82831	6.38665	6.8985	6.48831	6.32442	6.28333	6.07073	7.12847	6.04482	6.53909	6.66585	6.44332	6.46322	6.40821	6.14833	6.12791	5.81742	5.93028	5.34022
ENSG00000144749	1.50851	1.63259	3.90427	3.82723	1.49807	2.38132	1.28727	3.33636	2.74706	0.848341	2.82862	0.439602	3.8326	1.0521	2.34745	2.0985	1.4553	1.68688	1.64214	1.86901	1.95315	2.71334	0.901186	3.93894	2.41014	2.29649	4.58371	1.50157	2.83686	1.71699	3.50145	4.82568	3.68215	3.94801	1.11696	2.54574	2.77299	0.329084	1.66625	1.39155	3.62831	2.81642	3.47937	2.41188	1.36439	1.75115	1.29826	1.96847	4.37065
ENSG00000134504	1.90262	2.29641	3.6147	1.66011	2.6397	2.26582	3.46199	4.0073	2.46492	2.60292	1.64672	1.93524	3.77365	2.11053	3.71463	2.60984	3.59373	2.81892	2.84377	3.46973	2.13943	3.00128	2.18382	3.04675	2.85173	2.22567	2.47905	3.38712	3.35602	3.20117	3.23138	1.57317	2.49564	2.92796	2.48917	3.51826	2.90057	1.72747	3.12418	2.3126	4.07672	3.53967	3.40657	2.07325	2.18634	3.03768	3.31073	3.4063	2.74231
ENSG00000116833	0.108388	0.17466	0.273628	0.418435	0.0957614	0.0547737	0.146938	0.127589	0.210341	0.0599641	0.38066	0.118388	0.358235	0.0291931	0.381484	0.305023	0.102297	0.176085	0.291432	0.283796	0.220973	0.131811	0.11436	0.0198099	0.474478	0.385129	0.172599	0.474849	0.423931	0.173033	0.913977	0.523426	0.605729	0.199762	0.15363	0.0869622	0.23962	0.0739893	0.11937	0.0989284	0.295758	0.181162	0.290642	0.31159	0.0837802	0.20228	0.122391	0.33564	0.0866939
ENSG00000140104	1.8114	0.80302	2.13166	0.983788	1.70652	1.47478	1.66058	1.68761	1.75981	2.1011	1.63532	2.06286	1.66357	3.29214	1.06904	1.31072	1.23053	2.28927	2.64186	1.59713	1.30706	2.17044	1.13532	1.16572	1.01366	1.84454	1.29153	1.54274	1.35254	1.77186	0.981431	0.950854	1.45255	1.79633	1.594	1.62848	1.23445	2.92192	1.91578	2.33975	1.58749	1.44391	1.29176	1.1666	1.22212	1.68326	1.14153	0.816047	1.40809
ENSG00000134250	3.9015	3.47816	3.52477	2.89648	3.08182	3.54954	2.84561	3.64635	2.56635	3.43962	3.35988	1.34005	4.58641	1.6245	3.65288	3.14613	3.31076	3.62713	2.64068	4.2648	2.11589	2.79782	2.72256	3.43692	3.54187	3.69809	2.17537	4.19752	4.09158	2.77516	4.08606	2.92093	2.85408	3.0368	3.56415	2.54162	3.60268	1.44934	3.31274	0.981448	2.90912	3.74222	2.6122	3.44935	3.70848	3.10542	3.57321	4.13637	2.76321
ENSG00000004700	2.09548	2.77551	3.79654	3.48326	3.70158	3.72001	4.03141	3.02768	3.14988	3.24778	3.42347	0.341826	3.36253	1.87582	3.43231	3.81802	2.96267	3.31213	2.73116	3.62286	3.45152	1.82221	3.36035	3.73792	3.88596	3.49974	3.42375	3.07874	3.27617	3.09793	3.34647	3.32288	3.25655	3.70781	3.25993	2.38588	5.24901	1.34957	2.83522	1.20215	3.70664	4.13945	3.91594	3.51237	2.0123	2.67425	3.67166	3.1126	3.43155
ENSG00000141560	4.51694	3.7319	4.32412	3.44802	4.2696	3.70169	3.33669	4.03091	3.57383	3.60884	3.44789	3.6953	4.34025	3.02106	3.60484	3.63747	3.78184	3.36955	3.74803	4.41825	4.07126	5.20373	3.93179	3.33698	3.68729	3.61823	3.81646	3.20956	4.11118	4.12249	4.10321	3.55349	2.95251	4.06129	4.18141	4.05494	3.37657	3.28423	3.70288	3.3031	4.08431	3.91646	4.29447	3.17477	3.13521	3.81314	4.37164	3.96174	3.89146
ENSG00000136842	0.201257	0.149234	0.463034	0.728669	0.12865	0.40182	0.143437	0.461525	0.598815	0.258975	1.5067	0.826709	0.477716	0.538465	0.693351	0.336357	0.272682	0.0980065	0.213501	0.621897	1.8278	0.134238	0.784657	2.38489	1.94649	2.66172	2.60638	0.0537733	0.178722	0.0872508	0.641215	5.8672	1.17464	0.348469	0.0928867	1.19873	0.75193	0.20345	0.868298	0	0.570618	1.25337	0.896359	1.97306	0.0316232	0.144666	0.904863	0.100243	1.7806
ENSG00000006744	3.07284	4.00145	3.9124	3.44805	3.09026	3.68529	3.99046	3.95371	3.8143	4.15991	3.27708	3.479	3.82769	3.79951	4.22427	3.72942	4.2865	3.47163	3.67385	3.77706	3.50886	3.87041	3.66651	3.33319	3.83831	4.27039	3.8539	3.77426	3.29888	4.34841	4.13905	3.67418	3.89533	3.44556	4.06372	3.80219	2.78051	3.26357	3.80556	4.07869	3.92078	3.52559	4.06936	4.2267	2.69201	3.63785	3.40996	4.09449	3.80844
ENSG00000137726	0.195531	0.525714	1.11145	1.93772	0.370123	0.954083	0.30846	0.369916	2.49749	0.632603	1.60477	0.622442	1.19654	0.978677	0.773777	0.441315	0.520048	0.177627	1.20258	0.528414	1.0579	0.293138	0.55392	0.261186	1.42847	0.807858	1.99358	0.259061	0.218684	0.4761	1.03434	1.66777	1.10506	2.82244	0.0887006	0.264753	1.38766	0.744028	0.19548	0.363509	2.68494	0.528428	1.43764	0.535258	0.116525	0.147446	0.359495	0.389565	2.65841
ENSG00000159111	3.89794	3.64711	4.44691	3.86043	3.76621	4.16327	4.33351	4.14101	3.55748	3.85645	3.84849	3.312	3.9698	3.49341	3.76604	3.87136	3.85552	3.97064	3.6617	3.74667	3.98027	4.07399	4.68375	4.39851	4.04276	4.19738	4.28112	3.64138	4.06025	3.75453	4.23604	3.92323	4.28199	3.92742	3.57338	4.04853	3.5838	2.7867	3.4917	3.79908	4.42568	3.94964	3.9454	3.6845	3.42748	3.84966	4.15037	3.8158	4.20301
ENSG00000025770	3.82955	3.32968	4.47529	4.6762	3.9087	5.00026	4.61552	4.44375	5.61691	3.05755	3.21857	5.72139	4.77241	6.43776	3.89335	3.48333	3.25066	4.39541	4.08983	4.20419	3.85911	5.61383	3.73654	4.22323	4.44906	4.18086	5.45355	3.14604	3.95493	4.65871	5.23395	3.55613	4.50857	4.77705	4.31965	4.83344	4.4022	5.56087	2.8579	5.41635	4.82323	3.32533	4.7057	4.42809	3.81804	4.05989	3.88294	3.3738	4.50179
ENSG00000163291	0.927574	1.06825	1.68826	1.47603	1.42299	0.910213	1.2006	1.31011	0.813753	0.758131	1.00656	0.143056	1.09728	0.27925	1.71585	1.75134	1.02855	2.07605	1.14187	0.995817	1.33197	0.804305	0.600606	1.17345	0.838968	0.977678	1.26049	1.30185	2.10726	0.95582	0.745903	0.776262	2.17941	2.27533	1.03824	2.28878	2.58264	0.263003	0.674289	0.501077	1.5368	1.0278	1.35741	1.48853	1.23058	2.64225	1.24441	0.789096	1.67535
ENSG00000113657	1.89966	3.20946	5.43748	5.33817	1.62438	3.57696	5.63502	5.16813	5.11853	3.16949	4.07332	3.45267	5.78482	2.19933	3.84474	2.62972	1.35087	4.05328	4.13659	3.71213	3.7917	2.10123	1.70834	5.46074	4.77782	4.79717	4.6198	1.90002	4.75555	3.26821	3.53559	5.10837	5.23101	5.45805	3.30905	1.37862	5.61343	1.02992	1.08922	3.15032	5.64466	2.55883	5.58591	4.80585	1.09075	1.9124	4.2846	3.432	6.04951
ENSG00000034053	0.82804	0.647549	1.25547	1.8927	0.76754	1.2915	0.783036	0.523844	1.57758	1.61314	1.90454	0.607386	1.41883	0.70758	1.30958	1.00094	0.292333	1.45237	1.48959	0.656331	1.11486	0.0954937	0.549642	0.559924	1.89869	0.807839	1.71429	0.990709	0.665953	0.978462	2.36715	0.895789	2.13684	2.49766	0.359749	0.387006	1.69289	0.459125	0.208608	1.47065	3.32889	0.8184	2.85032	1.45563	0.309483	1.44827	0.764055	0.913145	0.321816
ENSG00000163297	1.72716	1.97115	1.79813	1.88408	2.40559	1.48017	3.67396	1.89492	2.04109	1.53291	3.24899	1.49919	1.50002	0.638965	2.08536	3.56756	3.20937	1.06216	2.4214	2.20948	2.25861	0.503738	1.94867	1.04477	2.98961	2.69782	1.34019	2.82762	1.87154	1.21061	1.75082	2.75039	2.08919	2.89633	1.38463	0.716131	2.11661	0.546162	1.4074	1.81712	1.53402	1.2276	1.56206	2.49529	1.03979	0.489236	2.11444	2.33755	0.993315
ENSG00000173436	2.34254	2.39681	1.66196	2.60179	2.51957	1.96123	2.63719	2.75288	2.70563	1.87788	2.74514	4.24812	1.87484	3.85849	1.78128	2.52724	2.67315	2.15746	2.83684	2.35037	2.97067	3.15489	2.59599	2.29539	2.04775	2.17237	2.0575	2.06242	2.39057	2.99446	2.7875	2.37096	2.45698	2.53299	2.28966	2.83479	2.26181	4.67723	2.24876	3.07367	1.63183	1.26292	2.38257	2.55338	2.07688	1.88238	2.42903	1.95604	1.5058
ENSG00000163536	0.434582	0.615709	1.28256	2.12104	1.97004	0.577749	0.765107	1.34832	1.44986	1.09339	1.52234	0.181007	1.6212	0.621622	0.867391	0.879644	0.799243	0.597995	1.12578	1.34405	1.39705	0.649144	0.559698	4.41471	2.3093	0.982913	0.803161	0.845904	1.74938	2.57035	1.17465	1.2884	1.81903	2.07194	0.434313	0.694219	1.81049	0.842785	0.684137	0.743759	2.24376	0.389376	3.29067	0.920496	1.10231	2.07731	0.89018	0.722846	1.42981
ENSG00000198833	3.21113	3.52019	4.16655	4.51328	3.56596	3.06583	2.18925	4.52301	4.37844	3.76665	4.22779	2.17406	4.16705	2.99866	4.25708	3.67186	3.89695	3.61775	3.82549	4.12918	4.45687	3.32943	2.82163	3.50455	4.9894	3.48017	3.62539	4.27153	4.6695	3.47296	5.15801	4.06348	4.68745	4.63632	3.44109	3.74904	4.61323	2.89242	3.5241	3.57234	4.76734	3.31297	3.71098	3.92419	3.4879	4.39562	3.92442	3.96519	3.79274
ENSG00000079134	2.18308	1.37014	2.75292	1.48362	1.91143	1.00226	1.68718	2.21766	1.8463	2.15679	2.11754	1.93829	1.3559	2.11504	1.47617	2.61582	1.85311	1.98195	1.64947	1.31776	1.79436	3.30662	1.19122	1.38181	1.38896	1.63475	2.02869	1.70285	1.90777	2.03079	2.40939	1.4383	1.76302	1.84071	1.5547	2.08616	1.38495	1.52901	1.74397	1.92593	1.7335	1.47747	1.85115	2.05752	1.65313	2.1649	2.04205	1.41165	1.34259
ENSG00000163508	0.137028	0.198335	1.32152	0.786527	0.402317	0.35617	0.475444	0.236145	0.994705	0.218506	0.6217	0.151226	0.608864	0.0845765	0.536446	0.0164303	1.14758	0.488101	0.485349	0.517524	0.817757	0.0831658	0.320693	0.368067	2.20887	0.352502	0.164054	0.515616	0.0970083	0.669165	3.77663	0.911721	1.26999	0.402754	0.153693	0.0658657	0.259481	0.00920399	0.481641	0.152547	1.03111	0.285194	0.909269	0.394403	0.466867	0.208642	0.156281	1.65049	0.0967497
ENSG00000167807	0.15859	0.0205159	0.171065	0.127024	0.200289	0.124289	0.0711855	0.022268	0.236461	0.0878606	0.387621	0.0276237	0.0984894	0.0886427	0.035455	0.0143809	0.102757	0.0722459	0.0879836	0.0446744	0.0604072	0.0729993	0.0230818	0.0356272	0	0.0650345	0.0408609	0.0441794	0	0.288319	0.0966286	0.0935967	0.135153	0.109164	0.0187901	0.0858128	0.0103231	0.465348	0.0967064	0.16764	0.317222	0.0508082	0.0877279	0.0754036	0.0419279	0.0243363	0.0379934	0	0.0913046
ENSG00000116299	0.421659	2.07842	3.45564	4.16382	0.218627	1.74219	0.165103	0.150706	1.41198	0.10679	0.234064	0.2418	3.15164	0.137093	0.188759	0.270227	0.273861	0.182931	0.58997	0.560677	0.208735	0.894709	0.240278	3.41978	0.674274	0.218108	1.71229	0.145339	2.22089	0.197955	0.519337	0.258	4.02063	0.294776	0.149267	1.82886	0.36611	0.0811597	0.123782	0.192916	2.97796	0.210491	3.34558	1.12744	0.0745276	0.607636	0.223933	0.217942	3.49029
ENSG00000277775	0.325654	0.149578	0	0.333442	0.224404	0	0.22832	0.055958	0.359543	0.191457	0	0.837087	0.442838	1.4711	0.464205	0.0362871	0.201836	0.153046	0.262864	1.10534	0.231375	0	0.409308	0.509749	0.144469	0.159937	0.423162	0.144595	0.0670776	0.357529	0.818217	0.227028	0.440126	0.262858	0.0931056	0.142586	0.0517438	0.845623	0.234226	1.06801	0.518934	0.629318	0.563864	0.095198	0	0.119698	0.0947067	0.0953614	0.0668969
ENSG00000139890	0.211681	0.036992	0.333426	0.267832	0.173172	0.0887522	0.126608	0.334478	0.277332	0.171878	0.355562	0.316609	0.534492	0.555074	0.134559	0.251874	0.0191859	0.230136	0.236562	0.227865	0.0762584	0.945245	0.0919441	0.221875	0.0918424	0.129706	0.448554	0.0982714	0.0481587	0.360823	0.439278	0.149773	0.23646	0.25103	0.0670147	0.115504	0.0821596	0.372271	0.066464	0.268832	0.28026	0.134227	0.446152	0.226852	0.13493	0.226107	0.101095	0.0935788	0.374283
ENSG00000142233	0.329019	0.0137972	0.430013	0.0486647	0.456214	0.223647	0.0402334	0.334465	0.434045	0.153609	0.176315	0.362164	0.208835	0.0600715	0.0159668	0.0429898	0	0.0281282	0.109841	0.219825	0.0960666	0.0813919	0.0460895	0.0861169	0.0199106	0.107478	0.0184202	0.0444588	0.113211	0.0611409	0.363577	0.019334	0.282745	0.0980391	0.0862001	0.0196399	0	0	0.253239	0.358925	0.139524	0.15346	0.378195	0.147959	0.0741777	0.0325635	0.147209	0.0321573	0.322489
ENSG00000152082	4.08249	4.58238	5.43001	6.16016	4.91473	4.73841	4.83586	5.27139	5.43368	5.04017	4.46885	8.078	6.0009	7.25208	4.40586	4.04978	4.7985	4.53868	4.71742	4.04378	4.60463	6.40108	5.24947	5.63946	4.36408	4.53982	5.41515	3.61186	2.78557	4.8216	5.75397	4.58731	5.19087	3.82472	4.39452	5.66206	4.28158	6.66229	4.32843	7.44675	5.52203	4.45056	5.79178	5.20424	4.48277	5.20812	5.15068	4.46688	5.55026
ENSG00000229924	0	0.00863871	0	0	0	0.0120453	0	0.018699	0.0134059	0.00841732	0	0	0	0	0	0	0	0	0	0	0	0.0207825	0	0.0200283	0	0	0	0	0.0224724	0.0111098	0	0	0	0	0	0.0245084	0	0.0134831	0	0	0.0113997	0.0286282	0.0188412	0	0	0.0204382	0	0.00810677	0
ENSG00000147885	0	0	0	0	0	0	0	0	0	0	0	0	0	0	0	0	0	0	0	0	0	0	0	0	0	0	0	0	0	0	0	0	0	0	0	0	0	0	0	0	0	0	0	0	0	0	0	0	0
ENSG00000260007	0.133087	0.0297636	0	0.0423192	0	0.08161	0.13508	0.493134	0.133832	0.165886	0	0	0.0823748	0.127276	0.0344141	0.101518	0	0.227535	0.126342	0.126375	0.0354743	0.264761	0.129469	0	0	0	0.0782654	0.0638604	0	0	0.0938489	0.0278769	0.0857766	0	0.466339	0.199954	0.143414	0	0.0359421	0.083764	0.0391852	0.0493241	0.0955011	0.475564	0.0802824	0.531738	0	0	0.0386721
ENSG00000143384	7.12967	6.5535	7.14285	6.31219	6.77292	6.38027	7.85213	7.35949	6.58479	7.28154	6.79958	6.15221	6.30886	6.01538	6.27682	6.52656	7.2064	7.77731	6.32416	6.83162	6.77163	7.08345	6.95485	6.48121	7.41963	6.72396	5.82399	6.95837	7.14479	7.38436	6.62401	6.30912	6.44103	6.43333	7.09199	6.40622	6.67777	5.78509	6.93203	6.40232	6.63841	7.04029	7.89879	7.88925	7.20065	7.48461	6.92904	7.08068	6.82253
ENSG00000184709	0.211417	0.661593	0.210606	1.26099	0	0	0	0.147382	0.299725	0	0	0	0.0736063	0.0261028	0	0	0	0	0.346835	0.407309	0	0.201052	0.0199723	0	0.0754742	0	0.0236865	0	0	0	0.0285103	0.0812508	0.341177	0	0.03233	0.646196	0.0177993	0	0	0.380469	0.135021	0	0	0.327774	0.0948703	0.234439	0	0.20288	0
ENSG00000132429	2.14749	1.84874	1.35287	0.55176	2.57412	2.12249	0.572466	0.153598	1.45622	2.91808	1.88399	2.38129	0.703115	0.578091	1.94733	1.91731	0.0234756	1.4735	0.703841	1.14801	2.458	0.157479	0.551799	2.39497	2.14322	2.93015	1.72168	0.119528	2.04618	1.20205	0.0183893	4.77734	4.00459	2.77028	2.15922	0.888451	2.47405	1.39483	0.759833	2.14123	0.648492	1.52201	0.876516	1.96582	0.177676	0.130285	2.10633	0.922844	4.16218
ENSG00000187003	0.0166542	0	0	0	0	0	0	0	0	0	0	0.112542	0	0	0	0.010074	0	0	0	0.0126393	0	0	0	0	0	0	0	0	0	0	0	0	0	0	0	0	0	0	0	0	0	0.0120071	0	0	0	0	0.0266798	0	0
ENSG00000092140	1.35646	1.22049	3.04951	1.70823	1.61231	1.45028	1.65693	1.91382	1.31381	1.56746	1.75839	0.510238	2.5542	1.21654	2.09891	1.89926	1.41523	2.06762	1.64894	1.60584	1.43446	1.3305	1.10643	1.7161	1.33384	1.67751	1.88062	1.58806	1.88255	1.70243	2.17509	0.958518	2.1926	1.18936	1.53819	1.54737	1.49643	0.382921	1.37854	0.776752	2.38417	2.16938	2.33629	1.72007	1.0213	1.38984	1.43921	1.0445	1.99802
ENSG00000177169	3.87534	3.44144	3.40817	2.61386	3.68227	4.08951	2.44098	3.36132	3.99961	2.81898	4.14255	2.77324	4.43192	3.70527	3.66145	3.77472	2.33336	3.17035	4.06108	4.25055	3.63406	3.08417	4.02352	3.94064	2.92171	3.59648	4.59688	2.51847	2.67208	3.88505	3.14512	3.62362	4.13101	3.34009	3.85596	3.39361	2.57326	3.08193	3.78645	3.55287	4.04913	4.47743	3.92869	2.99959	3.37847	3.03672	3.31798	2.83198	3.91198
ENSG00000162694	1.00343	1.18428	2.20017	2.08288	1.755	1.19136	2.27002	2.13956	1.66251	1.34394	2.4735	0.42512	1.35002	0.911731	1.60078	2.37166	1.21499	1.74428	1.90535	1.19304	2.02071	1.81281	0.777975	0.937522	1.38014	1.87044	2.0228	1.53503	1.42184	2.03578	1.98734	1.44126	1.75998	2.07434	1.0662	1.89886	2.36488	0.624927	1.70127	1.38736	1.85981	1.94739	1.32447	1.70825	0.578197	0.783079	1.77276	0.933001	1.89835
ENSG00000185630	0.475303	0.627101	2.53524	1.82407	0.777796	1.27373	0.158441	3.44192	1.08333	0.123284	0.589761	0.145977	1.74408	0.153405	1.40743	0.286562	0.122454	0.694542	0.961892	2.44924	0.999489	2.47827	0.129073	2.01711	1.35756	0.560782	1.39629	0.623258	2.7131	1.33207	2.21749	1.35232	1.13152	1.80831	0.443339	0.316301	1.83232	0.414194	0.950475	0.219865	2.85094	0.793059	2.16184	1.03392	0.400554	0.323065	0.389247	0.67155	1.02669
ENSG00000166535	6.31007	6.21962	3.13026	2.1747	2.83444	4.85454	3.46887	5.40316	4.82793	2.37381	4.57679	1.40828	5.91168	4.07831	6.37259	0.644648	4.5133	6.82627	4.23994	6.19737	3.61626	4.51345	2.07068	6.35986	1.70152	1.25234	3.96231	5.99333	7.197	2.00542	4.07408	0.98285	5.76797	4.05345	7.54033	6.10255	5.99335	1.68003	5.31619	0.76502	3.67803	4.05009	2.2608	3.59442	7.2848	6.53143	4.08153	5.78697	0.432859
ENSG00000082293	0	0.00253475	0.019687	0.189832	0.00292823	0	0.00893184	0.0164379	0.0273437	0	0.0400002	0.0863945	0.0177688	0	0.0883222	0.0333284	0	0.0155101	0.0110963	0.0133089	0.0535302	0	0.00570237	0.00589308	0.0645728	0.0871592	0.0135065	0.0182454	0.0327816	0	0.0363501	1.08243	0.0392255	0.0230211	0.0046369	0.0357401	0.0791966	0	0.01527	0.00363323	0.0232685	0.0314032	0.119822	0.0235676	0	0	0.0234429	0	0.00659799
ENSG00000235961	0.170748	0.191918	0.419508	0.511696	0.108733	0.142793	0.110708	0.0623295	0.407601	0.0742439	0.632203	0.487885	1.98561	0.378265	0.150367	0.118099	0.020014	0.281153	0.660003	0.0588825	0.294614	0.335592	0.09581	0.670284	0.234337	0.360161	1.06782	0.0210684	0.0253263	0.0735801	0.149563	0.663053	0.850468	0.481951	0.086806	0.13309	0.384869	0.338923	0.0234664	0.443035	0.460343	0.147169	1.07875	0.31166	0.0265877	0	0.105332	0.0715641	0.0500796
ENSG00000146221	0.00813664	0.0209675	0.073718	0.0298507	0.0321752	0	0.0164808	0.374948	0.0537044	0.0472329	0.017213	0.0188813	0.358391	0.0103461	0.00813041	0	0.0287427	0.0703771	0.00770715	0.0366343	0.00838326	0.710723	0	0.0162945	0	0.0224896	0	0.0050863	0	0.00903343	0.119745	0.00657457	0.0407971	0.0255314	0	0.0298153	0.0279667	0	0.00849485	0.0398253	0.0725387	0.0405385	0.37153	0	0	0	0.0130579	0.0131508	0.0975591
ENSG00000182747	0.0105697	0.0181911	0.184368	0.0259086	0.0105369	0.134122	0.010735	0.229296	0	0	0.0112129	0	0.0381925	0.0134368	0.0105617	0.0253848	0	0.00934642	0.0396388	0.0629264	0	0.0219453	0	0.0106134	0	0.0291716	0.0481463	0	0.0470741	0.197857	0	0	0.00893867	0	0	0.012997	0.0182417	0	0	0	0.0239798	0.037684	0.0874483	0	0	0	0.016954	0	0.0469464
ENSG00000183495	1.66323	1.72718	2.52525	1.72802	2.08981	2.24987	2.02526	2.84091	1.8211	1.60377	1.57809	1.32388	2.9385	1.16823	2.07221	2.39697	2.15474	2.33888	1.99214	2.56725	1.17351	2.23973	1.95994	2.27343	2.2724	2.21811	2.00352	2.25133	2.67173	2.13165	2.53126	2.03924	2.70999	2.10559	2.22817	1.79388	2.39634	1.09228	1.93493	1.62781	3.21044	2.24391	2.57863	2.40274	1.94572	2.50632	2.35799	2.53703	2.79604
ENSG00000163534	0.00634576	0	0.0265498	1.31514	0.006326	0.0378009	0	0.0177686	0.29933	0	0	0.0437687	0.0306088	0	0.0560891	0.00383306	0	0.038822	0.104536	0.0842484	0.0578039	0	0.0245068	0.0378166	0.280381	0	0	0.0621819	0.0284045	0.0689544	0.611038	0.0896069	0.368062	0.0298051	0.019952	0.0612935	0.016414	0.00855334	0.0457507	0	0.19622	0.0136684	0.0588349	0.0702133	0.0075124	0.0761661	0.117747	0.0801085	0.00713406
ENSG00000143382	1.09632	1.9266	2.55171	1.55775	1.40931	1.7038	2.41654	2.97197	2.00855	2.2116	3.50723	1.08706	1.68573	1.41755	1.66663	1.94605	2.6402	3.34019	1.75504	1.1757	2.65964	2.74664	2.67045	1.32208	2.9277	2.85905	0.944207	4.13819	3.3213	0.806337	1.34162	4.10431	1.79436	1.57915	4.13053	2.32939	2.47313	0.533522	3.98628	1.31891	1.25469	1.9382	1.11184	3.56401	4.33439	4.55752	1.43963	3.73787	2.02365
ENSG00000221916	1.17569	0.508372	1.07054	0.940568	0.840152	0.616887	0.360837	1.52552	1.109	0.349808	0.800891	1.66549	1.70851	1.92177	1.08288	0.631117	0.697899	1.52372	1.16127	0.953447	0.494062	2.12213	0.647373	1.14887	0.267404	0.720407	2.09821	0.416688	0.58451	0.551955	1.87163	0.778625	1.1128	1.32702	1.19467	1.12196	0.869541	1.63559	1.43516	1.73832	1.23581	0.588295	1.21468	0.64637	0.6598	1.03657	0.498034	0.442132	1.30348
ENSG00000154556	0.290332	0.928687	0.606422	1.12294	0.0655894	0.35021	0.0940998	2.46767	0.687472	0.318072	0.41506	0.123475	0.371599	0.0633093	0.541873	0.296042	0.0675788	0.195095	0.335924	0.258757	0.610419	0.476317	0.118529	0.0902448	0.3438	0.466361	0.204048	0.447707	0.961284	0.0838968	0.253173	1.78171	0.587026	0.147976	0.145939	0.654626	0.377107	0.0220265	0.156731	0.149306	0.836566	0.219329	0.905576	0.910552	0.20908	0.142916	0.154898	0.911748	0.148524
ENSG00000155275	1.86613	1.05743	1.17534	0.849974	1.82871	0.835472	1.05267	1.17265	1.42097	1.20328	1.06775	0.90578	1.31206	1.18015	1.06547	1.24339	1.39725	1.47125	1.21728	1.1419	1.70728	1.29072	1.07617	1.32821	1.36604	1.21376	1.30855	0.779567	1.70103	1.4348	1.49475	0.903465	1.40365	1.29476	1.60223	0.926764	1.0019	0.838052	1.10053	1.69327	1.34236	1.44531	1.2551	1.26801	1.32198	1.60368	1.50652	1.39847	0.842369
ENSG00000256229	0.0855124	0.176273	0.486831	0.754629	0.112587	0.40449	0.147314	0.214398	0.426498	0.043764	0.750609	0.143137	0.963859	0.0295894	0.488224	0.311239	0.213284	0.17113	0.258979	2.2191	0.592216	0.226158	0.16177	0.040703	1.04379	0.598871	0.298832	0.303196	0.29271	0.183495	0.5221	0.679549	0.993459	0.658384	0.0899068	0.117922	0.588505	0	0.106366	0.145049	2.98927	0.215575	0.132378	0.275655	0.100736	2.39154	0.218607	0.363692	0.0645785
ENSG00000144161	0.972279	1.02114	2.38133	1.83644	1.57059	1.38127	1.44174	2.2873	1.51481	1.0368	1.54256	0.774097	1.74793	0.968293	0.759858	0.989147	1.31971	1.7772	1.28318	1.24149	1.0867	2.51939	1.38759	1.46068	0.684091	1.17126	2.05543	1.10025	0.992682	1.55918	1.81816	1.21425	1.52126	1.46195	1.03875	1.66905	0.945251	0.814501	1.59051	1.20408	1.87177	1.42931	1.99654	1.39102	1.0992	1.41392	1.54925	0.9532	1.39424
ENSG00000119522	1.38414	1.3371	2.17004	1.90642	1.74069	1.80887	1.90503	1.93758	1.74123	2.44857	1.69986	2.60546	2.03693	1.7162	1.54006	1.824	2.37273	2.02525	1.85047	2.71127	1.82768	1.93772	2.26084	2.62919	2.34585	2.15027	1.82404	1.74369	1.75386	1.94746	2.46457	2.2667	2.5056	2.37463	1.7457	1.67532	1.89831	1.65078	2.13505	1.90592	1.81292	2.01564	2.63076	2.24306	1.70465	2.42998	2.39895	2.57114	2.01684
ENSG00000154451	3.56126	3.27155	2.95309	1.62973	4.19718	2.40676	2.4954	1.69408	3.11285	3.85677	1.87557	1.10509	2.55785	0.449906	1.23628	0.470597	6.60627	2.28706	1.8295	1.83403	5.81411	0.736435	5.77555	0.624035	5.84318	5.97495	0.381066	1.87149	1.77962	3.08576	4.18717	1.88922	2.30066	2.15919	2.36703	1.19524	2.3403	0.264409	4.21054	3.15443	1.71246	2.5136	2.83367	2.35354	2.10262	3.6394	2.75336	6.18683	0.435244
ENSG00000118849	3.22815	4.54491	4.63466	5.29898	2.78998	3.34176	0.324401	2.20342	5.80219	0.326924	1.98674	0.501411	2.98806	0.385188	0.802545	0.388471	3.85218	1.03017	2.25594	3.10369	3.54294	5.83451	1.82685	2.28209	3.17231	2.43192	1.48495	1.16671	1.89893	2.55069	2.49853	4.89726	3.96853	3.61941	0.344348	3.64107	2.75826	0	0.823367	1.97708	3.9141	2.12302	2.13714	4.62626	0.232129	2.42566	3.19475	1.91199	2.75095
ENSG00000112619	0.128637	0.202729	0.234894	0.804812	0.120562	0.144449	0.114877	0.232393	0.401093	0.0418023	0.518975	0.0575947	0.108318	0.0730257	0.551829	0.536319	0.0296126	0.121126	0.129408	0.110381	0.345132	0.0684635	0.0402832	0.0333866	0.400545	0.332346	0.207486	0.200668	1.35857	0.0549724	0.133954	1.36564	0.122576	0.221078	0.0521743	0.347763	0.473345	0	0.0601898	0.0907201	0.285949	0.223822	0.24077	0.714213	0.00992491	0.237816	0.141527	0.0534568	0.177717
ENSG00000184351	0	0	0.515931	0.22086	0	0	0.0388201	0.035852	0.148007	0	0	0	0.0912712	1.22195	0	0	0	0.0338411	1.46191	1.4051	0.0777031	0.0785715	0	0.0383846	0	0	0.0440173	0.0239902	0.125437	0.0835765	0	0	1.07866	2.712	0	0	0	0	0	0.137062	0.868889	0	2.79348	0.120081	0.0889597	0.077295	0	0	0.0429188
ENSG00000197586	3.8983	3.09296	3.88587	2.63877	4.25628	3.64789	4.10514	3.16563	4.65653	2.93528	3.66708	3.06823	4.08764	3.18734	3.6396	4.23575	3.73629	3.30062	3.28666	3.426	3.38801	3.03592	3.14041	4.25513	4.3376	4.43544	4.22519	3.92265	2.86738	3.8078	3.14567	3.21878	4.50978	3.83086	3.55076	3.42629	3.60506	3.42468	2.79705	4.21702	3.52943	4.07323	3.29005	4.09362	2.12529	3.84955	4.66642	4.31035	5.95596
ENSG00000243649	2.55429	2.57384	2.22557	2.92433	1.20669	1.71313	0.544345	1.24258	2.30684	0.936121	0.681745	3.43938	1.80001	1.54018	0.876532	1.30247	2.12821	1.60135	2.46308	1.77304	1.78816	1.80288	1.90122	0.261456	2.95389	0.739997	0.234164	2.50039	1.89703	1.44941	1.60759	2.2943	1.7417	1.15533	1.0414	1.40314	1.64038	2.4982	1.48243	2.8002	1.05935	1.49265	0.715847	1.98429	0.279511	1.14841	2.79212	3.25358	0.561934
ENSG00000243317	3.7323	3.68969	3.39593	4.11711	3.80291	3.51898	3.68255	3.36427	4.2449	3.14181	4.2003	3.14854	4.26159	2.97524	4.15967	4.1266	4.10057	4.22032	2.49704	3.02191	4.12895	4.76192	4.08679	4.94957	3.28212	3.40504	5.53131	4.06621	4.5945	3.28584	4.47394	3.79883	3.70007	5.16367	3.93228	3.97715	3.56866	3.66237	3.86942	3.90476	3.32976	3.93779	4.02174	3.48859	4.27967	3.93896	3.67988	3.41628	3.88221
ENSG00000153107	0.480974	1.18564	2.4936	1.52587	1.30002	1.53844	1.40809	1.68807	0.85458	1.46551	0.773902	0.645143	1.87027	0.655113	1.5342	1.87948	1.17311	2.21164	0.952801	1.71701	0.817035	0.965181	1.31378	1.65296	1.50675	1.56278	1.50111	2.05154	2.18694	0.989746	1.65663	1.13432	1.87188	1.6577	1.49647	1.12787	1.80414	0.374868	1.04934	0.722965	1.96621	1.62377	1.88423	1.61724	1.19161	1.75006	1.83741	1.7363	1.97357
ENSG00000129596	0.120575	0.149773	0.64855	2.18096	0.0990886	1.32657	0.0457152	0.316199	0.159507	0.0379386	0.564894	0.0777521	0.277397	0.0288064	0.288904	0.0870166	0.0401123	0.0976678	0.0841182	0.116469	0.407744	0.0236357	0.011065	0.0562866	0.792177	0.64276	0.613796	0.0628612	1.25402	0.0126409	0.313257	1.85241	0.554677	0.585269	0.0179456	0.172206	0.447193	0.104102	0.0699021	0.121991	2.27984	0.103198	1.3916	0.999256	0	0.0232445	0.123233	0.0544873	0.192294
ENSG00000102290	0.00214744	0	0.00180978	0.00264551	0.00427832	0.00258613	0.00653346	0.00201238	0.00287932	0	0	0.0248132	0.00521736	0	0.00214579	0.00129638	0	0.00189826	0.030211	0.0032537	0.00221267	0	0	0	0	0.0059573	0	0	0.00725178	0	0.0499455	0.0138178	0.00181524	0	0	0	0.00371401	0	0	0	0	0.00309047	0.17196	0	0	0	0.00345061	0	0
ENSG00000141505	0.127717	0.158083	0.218843	0.430669	0.115096	0.202275	0.0983008	0.209302	0.410315	0.154229	0.604597	0.700651	0.38286	0.491978	0.139786	0.223532	0.410699	0.0859165	0.321748	0.0739752	0.325098	0.219095	0.30314	0.0782933	0.319985	0.330126	0.463753	0.0731638	0.0805323	0.120853	0.820586	0.72929	0.476305	0.487267	0.111583	0.103055	0.168817	0.631696	0.0614206	0.304234	0.625996	0.150476	0.518676	0.385907	0.272964	0.0537301	0.316754	0.243164	0.163118
ENSG00000064419	4.0824	3.85837	4.48567	3.85685	4.24445	3.65784	4.08956	3.66369	3.80173	3.738	3.72402	2.43475	4.54388	2.316	4.07819	4.69887	4.01893	4.43809	3.37777	4.56524	3.6642	4.56888	4.32853	3.75701	4.0923	4.1882	4.90614	4.16105	4.81543	3.43145	4.50161	4.08398	4.62428	4.54789	4.25195	3.90005	3.70127	3.36422	4.03843	2.57563	4.07502	4.41109	4.09465	4.08967	4.16838	4.59549	4.56847	4.20327	3.63191
ENSG00000214216	0	0	0	0	0	0	0	0	0	0	0	0.0393421	0	0	0	0	0	0	0.0161265	0	0	0	0	0.0255634	0	0	0.019622	0	0	0	0	0.0137626	0	0	0	0.0517436	0.00738874	0	0.00891205	0.0105536	0.00972443	0.00614956	0.0319797	0	0	0	0	0	0
ENSG00000165282	2.08773	2.62175	3.79404	3.38814	3.41473	3.62332	3.19156	1.99306	2.01893	2.21567	2.03996	1.29041	3.96767	1.46179	3.96785	2.70352	2.97326	2.54245	2.77319	3.62068	3.17245	2.60903	3.20071	3.00038	3.90834	3.42204	2.5816	2.85332	2.81277	2.73027	3.27239	2.31268	2.54454	2.81767	2.81853	2.67838	2.12302	0.990386	2.45344	1.80393	2.99075	2.1778	3.09131	3.12102	2.3747	3.92872	2.72524	3.63488	2.98431
ENSG00000170906	4.19798	3.88275	3.19007	3.7945	3.85852	2.86406	3.60852	3.49463	3.7029	3.05103	3.4172	6.2657	3.08317	4.14533	3.10409	3.08305	3.62449	3.20969	3.71812	2.82952	4.10359	4.50428	3.93353	4.18532	3.51512	3.85522	4.94362	2.69684	3.39227	3.77229	3.62624	4.05057	3.28092	3.30983	3.14548	3.75192	3.33745	4.93103	2.99401	5.18773	3.0532	3.90198	4.21596	3.11957	3.31801	2.70088	2.65431	3.0396	2.80202
ENSG00000259417	0.0108555	0.00937106	0.0182482	0.0440735	0.021563	0.0043682	0.00368444	0.00679112	0.0337022	0	0.0229408	0.041692	0.0477867	0	0.0144449	0.0130927	0	0	0.0170979	0.00275007	0.0148931	0.044726	0	0	0.00903573	0.020039	0.00418455	0.009044	0.00408997	0.008045	0.0150784	0.0376372	0.0152685	0.0170975	0.0171092	0.0309555	0.0062716	0	0.0188391	0.0178636	0.0607921	0.00782209	0.108957	0.0347986	0.00429525	0.0148132	0.0231688	0.00293735	0.0122017
ENSG00000265590	0.0479762	0.0818159	0.262378	0.0588892	0.0478289	0.0290835	0	0.109981	0.294837	0.15536	0.259827	0.395102	0.219686	0.0902339	0.0241691	0.0577118	0.0842716	0.0837579	0.31055	0.018368	0.0971834	0.0499675	0.091809	0.183728	0.0885306	0.129517	0.159678	0.0596735	0	0.201896	0	0.149558	0.137541	0.180696	0.180813	0.0297098	0.140644	0	0	0.115923	0.254207	0	0.712431	0.0767635	0	0	0	0.076896	0.131012
ENSG00000148200	0.787104	0.374314	1.036	0.434051	0.772966	0.995821	0.769638	1.32139	0.510485	1.04856	0.464457	0.26123	0.901179	0.301455	0.342141	0.311501	0.549402	0.604861	0.184036	1.33269	0.396298	1.59941	0.851479	0.781431	0.502057	0.66146	0.617081	0.404755	0.610868	0.793122	0.512757	0.319348	0.758297	0.670726	0.660604	0.256744	0.407675	0.0783866	0.834364	0.756899	0.818129	1.24525	0.770481	0.785841	0.690852	1.12289	0.818272	0.845062	0.937
ENSG00000155254	3.99911	3.73721	4.6293	4.88367	5.40586	5.0239	6.6601	4.2392	4.92594	4.34699	4.16954	4.79184	4.03956	4.15871	4.52524	5.3063	5.18575	4.42416	3.7709	2.61353	4.55017	2.95659	5.02336	4.57258	5.01847	5.10123	5.19107	4.96172	3.97356	4.75961	2.70646	4.16675	4.38262	4.97726	3.66037	4.80779	5.22135	1.97168	4.31899	4.50556	4.31619	5.06717	4.2052	4.22027	2.9126	3.95709	4.88851	4.36942	4.8739
ENSG00000157184	1.56985	2.7841	2.72156	2.47736	3.00846	3.10935	2.73375	3.02933	2.57348	2.25491	2.45873	1.86758	2.87922	1.72707	2.29543	2.73166	2.95766	3.43125	2.96817	3.30095	2.49179	3.1311	3.26567	3.01399	2.76368	2.58356	2.21675	3.10207	3.15885	2.43024	2.85386	2.71474	3.4703	3.22099	2.30199	3.08442	2.51203	1.35713	3.21184	2.4274	2.90214	3.26771	2.31417	2.71098	2.80574	2.6578	3.16505	3.11697	2.55886
ENSG00000155252	3.4398	3.43061	2.91641	3.0147	3.61555	4.15205	3.96102	3.41178	3.78787	3.63392	3.50989	3.66889	3.29017	3.26931	3.87288	3.98228	4.20045	4.08422	2.67194	3.10764	4.04749	4.18609	4.59707	2.92026	4.14098	4.11552	3.38083	4.56229	3.92998	3.3305	3.82162	3.29894	3.65241	3.8188	3.78044	3.03667	3.67262	2.44083	4.0595	3.92904	3.07601	4.24682	3.28608	3.16632	3.98908	4.60027	3.61942	3.832	3.75322
ENSG00000100802	1.16794	1.25048	2.00889	1.88753	1.44137	1.5413	1.69516	2.05144	1.70927	1.30504	1.40277	1.53828	2.08627	1.88754	1.39504	1.72764	1.07413	1.51468	1.51526	1.35877	1.26975	2.30614	1.43086	1.83752	1.33933	1.95351	1.41671	1.29431	1.60951	1.74496	2.18724	1.24699	1.39179	1.36792	1.2945	1.54445	1.04594	1.77672	1.33568	1.58394	1.9296	1.47374	1.27995	1.35577	1.1475	0.973539	1.20655	1.05583	1.02134
ENSG00000134986	2.76988	3.1195	3.14406	3.03388	2.50919	2.47402	2.05616	2.35487	3.38415	1.67053	3.74495	1.2512	1.79749	1.24848	3.04328	3.6601	1.38377	1.24659	3.13603	1.99811	4.09375	0.930679	1.30093	2.13533	2.56535	3.55581	3.08455	2.40992	1.64159	2.84385	1.05316	2.66544	2.12131	2.94221	1.7304	1.67164	3.27574	1.26205	1.94181	2.73925	3.2063	3.76834	2.08467	2.14697	1.3018	0.713459	2.72829	1.87204	1.86174
ENSG00000198517	2.96521	2.99025	3.43478	2.84108	3.17834	3.56105	3.33991	2.87449	4.05658	3.49536	3.42155	0.651661	3.988	1.35598	3.12268	3.48253	2.50746	4.17243	3.74064	3.0712	2.49231	3.09063	3.77477	3.06774	3.36082	3.01526	2.91389	2.91707	3.32561	3.67628	2.94401	3.975	3.9809	2.74406	3.28204	2.90838	3.08876	1.50972	2.66694	1.59774	3.04756	3.5116	3.54286	4.20515	3.83277	4.59554	3.60101	2.7826	3.33897
ENSG00000115556	0.786068	0.63321	0.995721	0.577056	0.818336	0.416566	1.436	0.794262	0.892582	1.00475	0.775806	0.44159	0.524713	0.289218	1.01382	1.73644	1.10558	0.9547	0.59151	0.74562	0.630747	0.56027	0.439571	0.436476	0.812514	0.959385	0.576486	1.25826	0.461257	0.943105	0.7259	1.97179	1.21533	0.593285	1.00628	1.1803	0.742253	0.669258	0.593956	0.328896	0.665661	0.623453	0.833244	0.865438	0.451716	0.558451	1.3394	1.01066	0.961673
ENSG00000125834	3.76147	2.70954	4.02688	2.54776	3.29916	3.01821	3.39572	3.99241	3.02547	3.09738	2.85454	1.97533	3.85321	1.35686	4.03494	3.54186	3.2025	3.63767	3.37762	3.54217	2.5432	3.03487	2.4727	3.46288	3.30385	4.29939	4.21564	3.46001	3.2264	3.22119	3.5931	2.62726	3.99475	3.79179	3.69227	3.48352	3.4814	1.5705	3.08076	2.53003	3.35555	3.68099	2.50541	3.17616	3.07226	3.19044	3.8989	3.70774	4.04199
ENSG00000054523	2.13656	2.40085	2.44464	1.87898	2.10418	2.75809	2.29469	2.5928	2.04272	2.20832	2.52695	1.28744	2.5793	1.48942	2.85001	2.40561	2.29733	3.10678	2.75476	3.1424	2.15016	1.4846	2.50683	2.24848	2.49601	2.89335	2.38446	3.31319	2.84732	2.41801	2.10949	4.80449	2.49835	2.94875	3.02538	2.2472	2.99754	1.97864	2.76928	1.71332	2.31613	2.53645	2.0622	2.70744	3.22777	1.87762	2.59988	3.05906	2.70712
ENSG00000165323	0	0.0111561	0.249481	0.208143	0.00387666	0.0522	0.0869742	0.0548929	0.156567	0.00653206	0.0434136	0.0621325	0.023485	0.0261887	0.0383948	0.0117028	0.00230723	0.00458188	0.00245653	0.0243856	0.0225596	0.00270311	0.00629188	0.0194195	0.0509178	0.0232481	0.388837	0	0.0116622	0.0014408	0.0841648	0.0392934	0.0021925	0.0542835	0.00817764	0.00637559	0.0615594	0.0208593	0.00541112	0.0127902	0.101382	0.0120952	0.068222	0.0062798	0.0152913	0.0211285	0.00624639	0.00733674	0.054427
ENSG00000213445	4.10963	2.80736	3.38182	3.89131	2.64512	3.22279	3.04062	3.18141	4.03827	2.92914	4.08324	4.20592	3.27255	5.08396	3.01269	4.01204	2.58614	3.0712	3.49882	2.86428	3.47677	3.03657	3.26561	2.82543	4.0109	3.39646	2.85436	2.53767	3.026	3.27678	4.22665	3.15187	3.56937	3.23223	2.6572	2.60997	2.99459	4.26247	2.51337	4.0068	2.85598	3.24099	2.38418	3.53603	3.71413	3.01392	3.85532	3.55976	2.81487
ENSG00000106853	2.21553	3.07088	4.88398	5.84332	3.97609	3.80221	4.20614	3.01811	2.34171	3.80686	3.81912	4.2486	5.87741	2.81988	3.34419	2.98227	3.50211	5.09549	3.91711	4.6359	3.70954	3.5383	3.58154	6.1119	3.26575	2.73916	5.51513	3.32381	3.36412	2.88194	2.43175	3.29439	4.61521	6.08028	3.21321	3.52953	2.36325	3.4381	3.45435	2.8114	2.83806	2.68056	6.35442	2.58712	3.35065	3.11137	3.51084	3.78396	5.77218
ENSG00000138326	7.03204	7.27137	6.01386	7.68048	7.1488	6.68704	8.47787	7.4694	7.49396	6.76421	7.07179	8.71001	6.65253	7.92763	5.9565	5.4727	7.72434	6.52648	6.39226	5.84588	7.09993	8.76327	7.32264	7.25246	6.82914	6.85413	7.91538	7.6294	7.12274	7.35477	7.50903	7.15501	7.14453	6.48801	6.31872	8.36648	6.69654	8.01277	6.95463	8.42273	7.35238	6.73154	7.24273	6.90509	7.9937	8.12293	6.61832	6.75399	6.58638
ENSG00000116688	5.33335	5.23195	4.53883	4.50189	5.81074	5.37258	5.73096	5.43854	5.14216	5.55542	4.5993	4.01366	5.21376	3.89054	4.954	5.57374	5.57197	5.50589	5.78437	6.18609	5.12352	5.79334	5.78722	5.34055	5.82862	5.67808	4.63814	5.47326	5.69967	5.80845	6.03885	5.32215	5.41683	5.0812	5.6137	5.24952	5.41421	4.49202	5.35863	4.99952	4.64813	5.15526	4.82913	5.45804	5.32317	4.61263	5.97486	5.74417	4.7466
ENSG00000076067	2.63341	2.216	2.46261	2.28587	2.57647	2.86789	3.11432	2.36301	2.50905	2.46583	2.85179	2.53142	1.6069	1.87179	2.77994	3.03714	2.61111	2.45107	2.47895	2.17985	2.71504	1.90267	2.24725	2.56411	3.04681	3.1187	1.97448	2.66875	2.19639	1.99352	1.06588	2.57664	1.76882	2.22417	2.01108	0.867368	2.9684	0.78255	2.35912	1.83649	3.17418	2.64737	1.8872	2.50763	2.55722	1.99717	2.24496	3.12415	2.33431
ENSG00000185565	0.310491	0.402334	1.84662	1.2585	0.379973	0.673227	0.386263	0.189091	1.28901	0.15253	0.697639	0.185098	0.624007	0.182211	1.60504	0.42714	0.139556	0.127004	0.635469	0.576507	0.887184	0.236969	0.168635	2.04834	1.45809	0.503327	0.217532	0.598185	0.954058	0.160259	0.564481	0.879262	0.698725	1.07401	0.206439	0.333869	1.1724	0.16648	0.151161	0.232061	2.59839	0.445097	0.945595	0.280247	0.195573	0.393098	0.275674	0.301534	0.063945
ENSG00000106633	0.0536316	0.0362098	0.252768	0.457682	0.0240082	0.098907	0.0896529	0.0557982	0.0480456	0.126943	0.274851	0.121966	0.0929224	0.139792	0.155148	0.0609815	0.114165	0.108507	0.0619017	0.114929	0.114217	3.56157	0.0407111	0.00608354	0.0952644	0.0497271	0.11442	0.0262971	0.0927967	0.920402	1.18288	0.0434657	0.569229	0.145714	0.110716	0.0513761	0.0816902	0.0081664	0.133129	0.122353	0.0807279	0.0216867	0.088925	0.085713	0.0425093	0.107862	0.0760399	0.0243672	0.0135904
ENSG00000163682	6.86274	6.51733	5.98104	7.74424	6.45765	5.99812	7.00311	6.04164	6.45984	6.26572	6.6423	7.42427	6.21083	7.94821	5.32138	5.89314	6.84551	6.47015	6.98033	5.11798	7.19812	7.13186	5.63409	6.51277	6.69841	6.24564	6.59912	6.70042	6.55387	6.60661	6.65851	6.46163	6.35572	5.73123	6.71581	7.04226	5.80475	9.54739	5.31623	8.24182	6.55016	6.11302	5.73548	6.27278	7.45625	7.17868	5.67665	6.10558	5.88101
ENSG00000174946	0.753712	0.527982	0.723743	1.6847	0.311316	0.355413	0.234718	1.09217	1.05362	0.217197	0.996129	0.238873	0.634443	0.0350532	0.409597	0.295669	0.934428	0.414811	0.639963	1.19932	0.967847	0.240367	1.1076	0.0816433	1.67561	0.752339	0.209259	0.723977	0.408078	1.096	3.0223	0.888044	0.949449	0.367165	0.166216	0.526107	0.664747	0	0.727596	0.540348	0.851178	0.631825	0.886443	0.538971	0.663294	0.236668	0.567147	1.77946	0.309267
ENSG00000204231	3.21403	2.95992	3.2578	3.32299	3.76586	3.45438	3.73547	4.04657	3.88446	3.15999	3.65723	3.4277	3.76242	2.63429	3.48838	3.87408	3.23378	3.61642	3.90222	4.20205	4.22254	4.01884	3.2609	2.91216	3.91401	3.64377	3.5429	3.06039	3.59427	3.61863	3.97941	3.62601	3.31037	3.19285	3.46335	3.74653	3.26235	2.9906	3.48509	3.37928	3.96625	3.36692	3.19606	3.35112	2.73553	3.1944	3.50558	3.25021	4.71884
ENSG00000011198	2.80716	2.64964	3.45395	2.56531	2.12191	2.23118	2.41479	2.80961	2.07965	1.69545	2.83224	1.05845	2.7988	1.45036	2.97212	2.3143	2.78562	3.02918	2.50771	3.44091	2.77232	3.85423	2.84597	2.79982	2.45856	2.10057	2.38955	3.39609	3.70115	2.32258	2.43213	2.52627	2.72693	2.86642	2.68164	2.28186	2.59094	0.920353	3.20337	1.5265	3.49771	2.50896	2.92093	2.24446	2.97667	4.26496	1.91763	3.0539	1.97577
ENSG00000143162	6.07656	5.32726	5.21344	6.67589	5.22665	5.43705	3.70204	5.70935	5.3815	3.82547	5.16018	4.70774	5.67414	4.2209	5.08071	4.78457	6.06036	5.17424	4.99442	4.36677	5.72589	5.74911	5.03787	6.43901	5.28681	5.00457	6.19625	6.01485	4.97951	4.97998	5.37203	5.15779	4.55989	7.32407	4.70853	5.56622	5.26465	4.85209	4.70709	4.12424	5.39665	4.49912	10.2351	4.5082	5.08363	5.54983	5.17955	5.27513	5.02954
ENSG00000111846	0.0806429	0.370334	3.03342	2.46695	0.176198	0.446125	0.0333088	2.01183	1.28795	0.0900896	0.126314	0.12926	1.92111	0.378445	0.487605	0.778947	0.448649	0.724312	0.167887	0.336703	0.14874	1.76582	0.103631	1.94983	0.42173	0.170045	2.44232	0.111265	1.65639	0.0512733	0.294644	0.497388	1.39384	1.85214	0.244444	1.26638	0.987839	0.0368189	0.0868225	0.221516	1.83524	0.147425	2.13392	0.757585	0.152127	1.20662	0.195081	0.303632	0.99837
ENSG00000105258	4.07406	3.85487	3.83951	3.84022	3.66891	3.32041	3.06563	4.27275	3.77851	3.7026	3.73174	6.33777	3.97068	5.9591	3.11025	3.50817	3.76771	3.65384	3.96255	3.61232	4.06582	5.59391	4.23849	3.97022	3.61352	3.86913	4.57701	3.27133	4.16388	4.03636	4.17897	4.17877	3.76236	3.64635	3.5628	4.41424	3.94314	5.72986	3.49889	5.96908	3.50584	4.47592	4.59812	3.46335	3.68555	3.41117	3.20453	3.63329	3.43391
ENSG00000184209	2.29811	1.87811	1.88705	1.68728	2.51772	1.49623	2.08962	2.41652	2.3012	1.89445	2.35257	3.26649	2.20268	3.04047	1.87609	1.7487	2.47422	1.86034	2.22021	1.88985	2.39405	2.75731	2.11373	1.66085	1.97945	2.05468	2.53337	1.93901	1.90597	2.51188	2.2194	2.48836	2.23951	1.9247	1.76273	2.38627	1.72923	3.18708	2.08949	3.40471	2.54081	1.88802	1.84555	1.88322	2.03617	2.41792	1.82555	2.00187	1.48679
ENSG00000136490	1.49411	1.34619	2.1845	3.44455	1.44173	1.82938	1.2427	1.9359	3.27472	1.11826	2.76618	2.30273	2.54849	2.77264	1.75307	1.60025	2.2147	1.17438	2.51839	1.82625	2.46177	3.57066	2.30836	1.01733	3.39315	2.20479	1.99196	1.36465	2.03852	2.75203	4.41831	2.73415	2.53492	2.42751	0.744667	1.37693	2.03887	1.61877	1.14656	3.1259	2.95795	2.07212	2.29093	1.87833	1.32827	1.51892	2.45678	2.36017	1.44928
ENSG00000136485	3.78777	3.51072	5.00558	4.81289	4.35209	3.99067	3.96136	4.55167	3.82795	4.69174	3.52643	2.42137	4.56869	3.18335	4.03499	4.07389	4.32214	3.91479	3.9988	4.1705	3.40027	3.71435	4.53544	5.0446	4.54973	4.39304	4.14085	4.11927	4.78236	3.66633	4.72904	3.68732	4.10601	4.71573	3.42585	3.53454	4.45752	2.26112	3.78384	3.08425	5.25647	4.26519	4.84954	4.09561	3.32578	4.1296	4.93341	4.6217	4.44823
ENSG00000155366	4.99679	5.09856	4.44535	5.50907	4.70652	4.69503	6.2367	5.80128	5.23333	5.61053	5.92005	7.11864	4.97201	6.10386	4.45005	6.31951	5.11752	4.84658	4.97482	6.20919	5.8598	5.35407	4.65851	5.06298	5.96488	6.16001	5.34728	4.71313	4.60517	5.64833	5.2811	5.49813	6.0687	5.04864	4.05169	5.19478	4.85303	5.77894	4.5058	6.16114	4.34081	5.52113	4.76269	5.59314	4.05148	4.71493	5.00472	5.54849	5.85144
ENSG00000064309	0.104708	0.134121	1.30692	0.709424	0.209902	0.218592	0.288138	1.03268	0.401009	0.161315	0.446691	0.0957347	1.0721	0.129229	0.955017	1.32602	0.188699	0.302029	1.77239	1.01308	0.303788	0.480978	0.156366	0.747307	0.631588	0.393588	0.430183	0.50796	0.474425	0.19584	0.31713	0.784838	0.826336	0.810846	0.0584644	0.321615	0.431153	0.159622	0.440549	0.152317	1.03036	0.43782	0.782462	0.414945	0.2994	0.280563	0.171559	0.342101	1.02578
ENSG00000183145	0.10407	0.0458197	1.00159	1.14233	0.181703	0.518494	0.0217568	1.86216	0.176854	0.394406	0.131253	0.314892	0.710834	0.494978	0.200991	0.35092	0.0190709	0.0095071	0.0303399	0.38529	0.0863218	0.0659528	0.0413415	1.46341	0.0528797	0.0149111	0.130842	0.165359	1.20099	0.330583	2.52747	0.0846197	0.672915	0.546428	0.0666193	0.0775624	0.0639223	0.0984605	0.0112243	0	1.73063	0.0830112	1.74502	0.0681305	0.0127244	0.0435736	0.554804	0.0345278	1.88429
ENSG00000101290	1.73142	1.62184	3.33961	2.37349	2.4094	2.05368	2.56447	2.98148	2.41437	2.19502	2.51179	1.43947	2.72121	1.74883	2.6767	3.10123	2.34227	1.72073	2.11036	2.25178	2.07232	2.09776	1.85438	2.54028	3.20712	2.89764	3.47273	2.57667	1.99998	2.0971	3.03394	2.85373	2.95431	2.86036	1.91335	2.01909	2.62651	1.153	1.81389	2.06022	2.40197	2.51924	1.99885	2.48579	2.007	2.28524	2.89002	2.8366	2.97408
ENSG00000137507	2.12084	2.50306	3.57207	3.97675	2.1964	2.5168	1.6533	1.56441	3.50146	1.38528	4.09615	1.44925	2.64958	1.59915	2.53526	2.90708	1.92967	1.48634	2.80163	1.93079	3.22305	1.60955	1.58469	2.01544	3.75997	3.76152	3.78808	2.52213	2.18133	1.35106	1.34611	4.55231	3.97427	3.34416	2.07927	1.22978	4.09953	0.866999	1.25161	2.23301	2.67507	2.50139	2.33254	2.87036	1.6284	1.15571	2.79776	2.3488	3.27295
ENSG00000172795	1.5729	1.40595	1.83379	2.10332	1.7334	1.78142	2.24631	1.96628	1.90213	1.33319	1.89635	1.29488	1.73264	0.948182	2.01977	1.90851	2.0979	1.70774	1.85665	1.83734	1.49729	1.44868	2.05023	1.35987	2.03467	2.09045	2.16006	2.28577	2.02517	2.29872	2.80216	2.13048	1.86928	1.82247	1.22876	1.2558	1.76984	1.17655	1.93747	1.39293	2.87408	1.96616	1.6924	1.8334	1.41916	1.68492	2.15641	2.16665	1.52896
ENSG00000198183	1.47569	1.29498	4.33249	3.224	0	0	0	0	0.331421	0.199603	0	0.0529387	1.98773	0	0.0229491	0	0.0406062	0.539897	1.01309	2.41067	0.0236591	10.6994	0	0	0	0.0318006	0	0	3.03593	0	0.0318491	0.0185757	1.44491	0	0	7.05546	0	0	0.284297	0.502745	0.196986	0.0329484	0.125533	1.6917	0	2.73491	0.0367441	0.125561	0.0511492
ENSG00000130656	0	0	0	0	0.0646171	0	0	0.0307307	0	0	0	0	0	0.196837	0	0	0	0.0853198	0	0	0	0	0	0.0329057	0	0	0	0	0	0	0	0.0265232	0	0	0	0	0	0	0	0	0	0	0	0	0.0387315	0	0.0523249	0	0.0368009
ENSG00000138172	1.52371	1.64767	2.23595	3.31024	1.57296	2.07955	1.9893	1.64551	3.01454	1.42204	3.00639	2.45889	2.98727	1.50923	2.56532	2.84821	2.1031	1.62146	2.04771	1.77019	2.93942	1.43838	2.27961	1.20527	3.40075	3.1761	2.58268	1.89605	2.54747	2.06554	2.88851	3.28587	2.93749	3.03516	0.965014	1.48521	2.96511	0.624857	2.38544	1.47586	2.88854	2.17094	2.49103	2.22103	1.08208	1.87848	1.97597	2.3176	2.30678
ENSG00000010256	5.50174	5.28469	5.81974	5.99711	5.42829	5.51407	6.75571	5.76555	5.73921	5.50087	5.74864	6.60679	6.15183	7.34684	5.93886	5.73759	6.42119	5.46494	5.54082	5.25059	5.67906	6.9427	6.40765	6.14023	5.72199	5.87364	5.95849	5.65851	5.60132	6.30461	6.33923	5.92468	5.97453	5.68685	5.24053	6.01231	5.63204	6.38476	5.79046	6.63408	5.76859	5.75076	6.29308	5.94103	5.84521	6.39453	5.8284	6.07676	5.73734
ENSG00000196341	0	0	0	0	0	0	0	0	0	0	0	0	0	0	0	0	0	0	0	0	0	0	0	0	0	0	0	0	0	0	0	0	0	0	0	0	0	0	0	0	0.277327	0	0.0453425	0	0	0	0	0	0
ENSG00000004838	0.0611107	0.016068	0.444627	0.207404	0.0549461	0.0661293	0.049851	0.0741069	0.238656	0.0156573	0.180331	0.240506	1.21784	0.227355	0.0430152	0.258034	0.0651357	0.0752484	0.113644	0.100496	0.134989	2.40903	0.0882213	0.0492939	0.0535174	0.0759931	0.117517	0.0498048	0.221433	0.163668	0.254115	0.0974571	0.290522	0.0673735	0.0579784	0.0304065	0.0788223	0.316303	0.0945992	0.125656	0.306489	0.0529361	0.0520963	0.171047	0.0791132	0.074796	0.0781262	0.0398709	0.0752214
ENSG00000138778	1.84392	1.63734	2.4906	2.06576	1.71031	1.92041	2.59251	2.53185	1.39548	1.97645	0.763605	0.560598	1.55523	0.849359	1.30029	2.72299	1.90736	2.23214	1.68223	2.88137	1.14487	1.97413	1.7837	1.37902	0.929998	1.93703	1.90879	1.93025	2.01084	2.30181	2.21679	1.1938	1.83627	2.01066	1.75659	2.53298	1.48244	0.697674	1.06305	0.908549	2.29764	1.40599	1.89307	2.71568	1.43703	2.2467	2.63496	1.65061	1.64785
ENSG00000055332	3.51342	3.52881	3.86834	3.11775	3.86487	3.02788	3.09926	4.06216	3.03983	3.31845	2.5453	1.88227	3.93612	1.41847	3.30476	3.41909	4.30719	3.89606	2.09199	4.19901	3.4879	2.27603	3.42673	3.13132	3.70095	3.58858	2.5968	4.19267	3.35319	4.33563	3.14303	2.6642	3.65773	4.46553	3.72635	2.24316	4.60068	0.825777	3.64476	2.28506	4.35979	4.65035	3.83571	3.16094	1.80614	3.413	4.24379	4.18815	3.12053
ENSG00000263201	0.0620042	0.03599	0.0351598	0.0257894	0	0	0.0212921	0	0.0555628	0.167428	0.0657066	1.70058	0.0992352	0.437146	0.101832	0	0.0732462	0.22429	0.0198635	0.015917	0.183645	0.126364	0.020374	0	0.0769627	0	0.0479265	0.126192	0	0.0232649	0	0	0.0177401	0.0651737	0.187424	0.443925	0.0712981	0.0558782	0.279751	0.50237	0.22259	0.102668	0.238404	0.0989249	0.0491749	1.35626	0.0663501	0.114968	0.046732
ENSG00000188306	0.013633	0	0.067644	0.12907	0.0135907	0.170942	0.0138459	0.0504498	0.0362812	0	0.0287797	0	0.0966346	0	0.0271178	0.0245892	0.0479294	0.149385	0.0129147	0.0308115	0.0140454	0.0560031	0	0.0136892	0.0503837	0.0189003	0.0618691	0.00852823	0.0305659	0.102738	0.0376135	0.0110198	0	0.0214602	0	0	0.0694121	0.482357	0.028325	0.0168478	0.25673	0.0674173	0.270464	0.0859408	0	0.279848	0.146449	0	0
ENSG00000012211	2.27167	2.64667	4.2617	2.13511	3.09726	3.91366	2.7186	3.12099	3.01171	2.52421	2.85504	1.90008	3.21648	1.80808	3.22859	3.41668	2.8543	3.14387	2.95387	3.1911	2.52802	3.08648	3.91235	3.27853	2.61424	2.60323	3.37052	2.54835	2.94826	2.77874	3.04747	2.48225	3.52273	2.59876	3.25588	3.22877	3.28463	0.711363	2.95597	3.32341	3.34926	3.00869	3.31894	3.08229	3.02037	3.6165	3.50631	3.0482	2.657
ENSG00000173818	2.20444	0.485757	1.11293	1.55822	1.25699	1.67713	0.839533	1.79388	1.21705	1.35621	1.22958	1.83963	1.52985	3.25487	0.777825	0.630851	0.719569	0.916741	1.14817	0.995133	1.03375	1.65701	0.914805	0.864987	0.899488	1.07232	1.0229	0.532607	0.920422	2.55626	1.0412	1.0999	1.58165	1.14766	1.06208	0.908509	0.986112	2.11736	1.16261	2.03906	2.38535	0.502435	1.79328	0.857357	0.519406	0.787017	1.30598	0.561964	1.95721
ENSG00000185662	0	0	0.0443707	0	0.0523454	0	0	0	0.136742	0.0442654	0	0.119465	0	0	0	0	0	0	0	0	0	0	0	0	0	0	0.0604126	0	0	0.0581959	0.141587	0.0838819	0	0.0820269	0.0820819	0	0	0	0.0547812	0	0	0.0379859	0.0976058	0.0839338	0	0	0	0	0
ENSG00000177324	0	0.00464901	0.117844	0.00663454	0	0	0	0.0100793	0	0	0.0170783	0.0494258	0	0	0.00538273	0	0	0	0	0	0	0	0	0	0	0	0	0	0	0	0.00748792	0	0	0	0	0	0.00466201	0	0	0	0	0	0.0302564	0.00869622	0	0	0	0.00436237	0
ENSG00000149262	1.26608	1.97895	2.81909	2.29452	2.15488	1.76009	2.34929	1.75205	1.87713	2.06217	1.5835	0.993584	1.83732	1.41382	2.2154	3.23221	2.06361	2.64454	2.73514	2.46614	1.77476	2.49957	1.69315	1.61711	2.34688	2.01659	1.9572	1.9541	2.3458	1.68853	3.0996	1.85782	2.32946	2.32794	3.124	2.4692	1.9117	1.0368	2.10667	1.26677	2.75371	2.06069	3.67841	1.96807	1.84566	2.28195	2.06562	2.42974	2.10589
ENSG00000143409	1.59328	2.27157	2.6607	1.84961	1.91207	2.17657	1.21094	3.1983	2.59966	1.27668	1.8291	1.58646	2.16248	2.56247	2.3951	2.65612	1.79316	2.29688	1.78022	1.69581	2.45237	2.89829	1.78986	2.36269	2.29232	1.81393	1.69736	2.03338	2.78468	2.33308	2.55442	3.67885	1.84262	2.02968	2.53368	2.12649	1.86235	1.82969	2.52181	1.59205	3.19023	1.98075	2.79476	2.31329	3.06302	2.22511	2.12941	2.56506	1.87368
ENSG00000158125	3.06128	1.54663	0.919168	0.351799	2.22585	2.93644	3.72523	2.90217	1.82198	1.1922	1.91744	1.0502	1.56402	1.43893	1.66605	4.34319	3.83279	3.73746	1.49875	2.19809	3.08183	0.850061	2.98714	1.0935	3.40957	2.92615	1.75005	5.54118	3.66123	1.30327	1.22588	0.915649	1.32522	0.680957	1.72687	0.916534	2.19847	0.994385	1.60841	0.876092	1.8027	1.77742	0.578976	2.01994	2.96394	2.53749	3.28725	4.50712	0.76926
ENSG00000185614	1.98266	2.78966	2.60594	2.74701	3.37311	2.56117	3.58839	3.4842	3.22055	2.37247	2.68159	4.54463	3.55461	5.51878	3.25548	3.55466	3.37932	2.71324	2.99676	3.28126	2.92264	4.71375	2.86866	3.21314	2.83581	2.81686	3.3932	3.07487	2.58115	4.02846	3.66339	2.72322	2.99861	2.28394	2.64216	3.97995	2.73801	4.73234	3.31241	4.72933	2.14455	2.79553	2.41867	2.91658	3.58292	3.9085	2.93539	3.38005	2.95462
ENSG00000180776	3.60883	3.59727	5.0918	5.00439	4.05513	4.27747	3.62096	4.81145	3.25705	3.9012	3.43525	2.01333	3.87139	1.55604	3.95277	5.25075	4.12908	4.01328	3.63674	5.5374	4.12037	3.42188	4.20808	4.47691	3.83042	3.46927	4.00882	4.40643	4.5735	4.40087	4.76892	3.42137	4.05975	4.58043	3.46433	3.91444	3.97308	1.8116	4.10475	2.19919	4.39715	4.09699	4.28654	3.64939	4.07673	3.66222	4.59831	4.10044	4.04037
ENSG00000137494	0.369064	0.78898	1.95539	0.996333	1.67289	0.767434	0.938916	0.722715	1.01236	1.22129	1.12601	0.331567	0.968533	0.227379	1.465	2.06592	1.23782	1.44927	1.35959	1.22485	0.974474	1.12989	0.754265	0.981133	1.23583	1.27221	0.760015	1.16998	1.3475	0.413962	0.804406	0.866263	1.43801	1.46845	1.94421	0.922435	0.775711	0.248431	0.925764	0.619367	1.42631	0.864545	0.809579	1.00947	0.811188	1.46785	1.31066	0.844532	1.00271
ENSG00000167703	1.13244	1.90864	2.49932	2.34334	2.45728	1.75099	1.13601	1.85628	2.86827	2.50661	2.895	2.10783	2.34406	2.29775	2.9274	2.11842	2.56488	1.73379	2.16367	1.8999	2.71213	1.17068	2.45322	1.44421	3.41646	2.94721	2.25177	2.07381	1.89471	2.09895	2.14462	3.92263	2.72577	2.15681	0.532982	2.09451	2.73346	1.17333	1.86671	2.724	2.85125	3.10657	1.90706	2.38735	1.15829	1.71939	2.35244	2.62719	2.67722
ENSG00000026036	0.303196	0.0341327	0.297263	0.111819	0.490612	0.371426	0.726181	0.492355	0.627534	0.148346	0.36762	0.192965	0.437557	0.0430162	0.0778626	0.341122	0.297696	0.123461	0.2459	0.44732	0.225899	0.23591	0.317867	0.0890732	0.251476	0.450086	0.211367	0.163567	0.155728	0.276566	0.450683	0.155288	0.280273	0.141744	0.267221	0.150252	0.139046	0.0343029	0.324787	0.188743	0.478226	0.183368	0.182369	0.449085	0.150981	0.252095	0.483648	0.184447	0.217483
ENSG00000186952	0.0130256	0.00675783	0.039157	0.0630888	0.0537692	0.0218969	0.0367398	0.0219029	0.0685395	0.00877272	0.0383602	0.0886497	0.0683666	0	0.0233443	0.0435571	0.0230909	0.0183868	0.0367053	0.0196976	0.0293603	0.188904	0.017689	0.00524598	0.0386606	0.0464931	0.0533484	0.0194775	0.0234165	0.0485791	0.0180874	0.0272156	0.0392736	0.0958768	0.0245899	0.0191952	0.0246938	0.00352569	0.0297483	0.0540157	0.04983	0.0131258	0.0604888	0.0457895	0.0123441	0.010688	0.0455491	0.0189414	0.0146395
ENSG00000136819	3.56459	3.52273	4.40823	3.80113	4.6309	3.71013	4.1641	4.20755	3.83929	4.55164	3.69347	4.88892	3.54414	3.65456	3.06048	3.66355	3.95983	3.61422	3.50281	4.36454	3.60211	4.24287	3.93407	4.16099	3.85951	3.74346	4.23776	3.29044	3.15109	3.5315	4.27297	3.97278	4.4565	4.04412	3.71926	4.04248	3.16665	4.82947	3.50474	3.59376	3.58811	3.99588	4.48707	3.61656	3.34166	3.98534	3.65152	3.79439	3.55832
ENSG00000126549	1.61197	5.42917	2.60846	1.16828	0.0114195	0	0	1.11955	0.513643	0.704799	0.0121519	0.152386	1.56474	0	0.0228026	0	0	0.135725	0.17421	2.13596	0.0235081	0.0701832	0	0.0115024	0	0	0.0521231	0	0.354639	0	0.151716	0.018457	5.53014	0.0180397	0	3.26066	0	0	0	0.27156	0.347722	0	0.284855	1.5897	0.0135567	1.23644	0.07212	0.0185012	0.0128753
ENSG00000183682	0.506229	0.122282	0.618818	0.565613	0.192927	0.758303	0.544155	0.218242	0.867873	0.281495	1.0991	0.0998165	0.607508	0.176908	0.231617	1.43044	0.0516858	0.172312	0.57092	0.302278	0.550704	0.279411	0.262089	0.114175	1.02584	1.22557	1.07041	0.482245	0.300079	0.26896	0.95697	0.628948	0.781738	0.705844	0.196278	0.155169	1.36676	0	0.214834	0.281696	0.916833	0.405661	0.266981	1.04295	0.117684	0.249894	0.880117	0.320749	1.47869
ENSG00000066117	3.30588	3.44497	4.07877	3.51353	4.23375	3.99179	4.26188	4.16497	3.70935	4.27761	3.19424	3.01576	4.05125	2.29728	3.61689	4.50409	4.21288	3.81999	3.49207	3.7797	3.72373	3.90241	4.04252	3.74186	3.92657	4.43124	4.05839	3.86111	3.94271	4.40969	4.31678	3.50683	4.23605	4.0362	3.74277	3.88546	3.85222	2.42222	3.93481	2.96396	4.45796	4.23697	4.17409	3.87516	3.41898	3.7047	4.30561	4.11026	4.63923
ENSG00000103222	3.86586	3.86157	7.18059	6.30572	4.51448	5.51052	4.04029	4.40225	4.92018	4.2835	3.54225	3.07826	6.9204	3.40978	5.0497	3.27754	3.62063	5.45987	5.31859	3.94544	2.79669	3.09857	4.59687	6.8675	4.07561	3.61802	6.27121	4.63735	4.96928	3.88495	2.89672	3.36539	6.54236	7.36336	4.86136	4.43791	4.85769	3.36556	3.52166	3.15314	4.98433	4.17789	5.41555	4.71191	3.63936	4.9325	4.53364	4.17964	6.98471
ENSG00000115415	6.76155	7.33789	6.61229	5.94873	6.95649	6.04218	5.2815	5.59204	6.46358	7.10887	4.21015	4.77466	6.50281	4.28161	5.50059	5.00287	7.97219	6.17676	6.37962	6.51044	7.32565	4.69941	7.80599	5.20098	7.66687	7.7115	4.19082	6.75432	5.46151	7.37148	6.31021	5.73134	5.91088	6.44201	6.07717	5.16369	7.21474	2.98963	7.38845	5.03169	5.99942	6.9334	8.99627	5.07147	4.48099	5.09241	7.25552	7.77223	4.62187
ENSG00000145192	0.141706	0.0628464	0.291176	0.07656	0.0520613	0.565096	0.219995	0.0585914	0.187031	0.0526704	0.0334647	0.0487133	0.123865	0.225101	0.0105885	0.0504567	0.0373524	0.0186799	0.0688401	0.0707783	0.0431828	0	0.156527	0.414803	0.0263001	0.0579093	0.318068	0.0521763	0.0471922	0.0117634	0	0.00856366	0.648016	0.328832	0.143783	0.0130299	0.0182879	0	0.290694	0.0389444	0.160433	0.0303018	0.0876646	0.0339752	0.073663	0.0429533	0.0504018	0.00858425	0.474705
ENSG00000137496	1.17116	1.82845	1.96264	3.1141	2.16094	2.04508	1.12828	1.15917	2.3986	2.06844	1.2246	0.986479	2.50454	0.520063	1.0416	1.54734	3.12254	2.02804	1.57159	1.63006	2.61612	1.1404	3.92845	1.03677	3.43204	3.38339	0.885345	1.19876	0.993436	1.89291	3.45314	2.25261	2.08598	1.92578	1.43558	1.47904	1.68482	0.162311	1.89172	1.25702	1.96151	2.27284	2.73645	1.91424	1.20593	0.89169	1.71806	4.38739	1.66261
ENSG00000105227	0.668612	0.368114	1.33821	0.787771	0.761837	0.622752	0.450599	0.675849	1.41033	0.761575	0.851427	1.00133	2.26647	1.35276	0.545821	1.10005	0.419109	0.540646	0.510408	0.369365	0.636707	0.756747	0.4978	0.776357	0.708648	1.03463	1.85327	0.557234	0.726498	0.48974	0.717518	1.67183	0.960308	0.775813	0.615518	0.378333	0.743336	0.427473	0.964677	1.08667	1.37898	1.06582	0.573864	0.790101	0.814566	0.267177	0.446419	0.334043	1.02505
ENSG00000266086	0	0	0	0.0427297	0	0	0	0.0326112	0	0	0.0368725	0.079738	0.0831628	0	0	0	0	0.0307801	0	0.0523875	0.0358193	0.139744	0	0	0	0.0480762	0.0400485	0	0	0	0	0	0	0	0	0	0	0	0	0	0	0.0251156	0.0649842	0	0	0	0.108947	0	0
ENSG00000125813	0.0586314	0.0364148	0.0143354	0.125996	0.0211486	0.219274	0.0172615	0.00798829	0.761577	0.191511	0.070799	0.0585298	0.385421	0.0481391	0.264604	0.00514986	0.0884737	0.164089	0.00404234	0.019306	0.0896435	0.127809	0.0489919	0.00428557	0.0420467	0.0293812	0.019592	0.334403	0.038052	0.0141705	4.33368	0.0475333	3.38582	0.128988	0.059516	0.0465814	0.183783	0.067579	0.0088984	0.0872068	0.0759059	0.0183425	0.0899612	0.00689148	0.0151068	0.0346243	0.033953	0.00690368	0.167704
ENSG00000123815	2.64824	2.23038	2.77589	2.32297	2.60465	2.60645	1.71201	2.48384	3.16639	1.81294	2.15743	2.36726	2.59527	2.82569	2.11506	2.65561	2.04878	2.143	2.68554	2.36427	2.4792	3.40861	3.02122	3.44028	2.17567	2.41731	3.26946	1.68018	2.5928	2.37217	2.7821	2.37895	2.64313	2.7033	1.90914	2.63336	2.3542	2.00671	2.60936	2.52289	2.532	3.0083	3.14216	2.25091	1.83662	1.59208	2.29198	2.5342	2.49713
ENSG00000158545	2.75504	2.29914	2.96999	2.78337	3.17923	3.03894	3.0266	3.275	2.80214	2.84901	2.33087	2.06567	3.33675	2.03156	2.97943	3.17058	2.83323	2.84798	2.63389	2.70513	2.2217	3.07263	2.96662	2.65517	3.08803	3.14851	2.73064	2.55947	3.03553	3.36616	3.31565	2.46622	3.43193	2.53992	3.07599	2.72486	2.97396	1.47386	2.85792	2.01699	4.18093	2.61619	2.53117	3.2231	2.32684	2.9053	3.53713	2.86955	3.32061
ENSG00000103199	0.981103	0.878166	2.01148	0.922904	1.48686	1.58518	1.58904	1.7249	1.63297	1.70488	1.05393	1.53598	1.75784	1.5919	1.20687	0.907688	1.19455	1.77558	1.37619	1.63347	1.23892	1.47722	1.2614	1.18376	1.14531	1.32083	1.60556	1.11065	1.14815	1.36863	1.65528	1.37923	1.75074	1.55773	1.2129	1.4403	1.18702	0.751934	1.2935	1.6344	1.51868	1.33229	1.53107	1.11825	1.20541	1.52373	1.56053	1.16506	1.42743
ENSG00000103197	2.69381	2.67792	3.17213	2.3703	2.77406	2.99764	2.68891	3.62996	2.97978	2.62498	2.51858	2.61244	3.44895	2.56861	2.92464	2.41978	2.41226	3.22251	2.97214	3.3984	2.40973	3.28385	2.90189	2.45032	2.90772	2.84761	2.81547	2.7211	2.44718	2.75326	3.24148	3.16589	3.16692	2.59448	2.9474	2.94258	2.71966	1.6651	2.99352	2.42827	2.85304	2.95544	2.94455	2.78848	2.87504	2.94745	2.95935	2.63045	2.8666
ENSG00000162598	0	0	0.0788754	0	0	0	0.0171421	0	0	0	0	0.0517863	0.246159	0	0	0	0	0	0	0.00855263	0	0.675281	0	0	0	0	0	0.00352965	0.0253036	0	0	0.00456315	0.0562872	0	0.0089114	0.00694804	0	0	0	0	0.0815	0.00406788	0.0212182	0.00911771	0	0.0115534	0	0	0.0189671
ENSG00000115138	0.139479	0.0685416	1.85723	2.88336	0.124258	0.759426	0.111283	0.117096	1.49321	0.273318	0.708652	0.880209	1.46953	1.15981	2.05505	0.131318	0.21476	0.250246	0.401028	0.661055	0.468329	0.129664	0.373918	0.814587	0.792263	0.190278	0.448219	0.27654	0.0182327	0.154103	1.06917	1.6042	2.6835	2.05964	0.214537	2.45139	0.337401	0.790991	0.0984994	0.855444	3.04655	0.144749	3.56186	0.306808	0.0750942	0.216389	0.305334	0.149993	4.35176
ENSG00000067365	1.36052	0.748436	1.62994	0.916998	1.33279	1.39097	1.1691	1.11361	1.59363	1.24114	1.38653	1.70553	1.19735	1.66396	1.15197	0.80596	0.823868	1.09044	1.45918	1.09464	1.21336	1.41868	1.19177	1.04663	1.0293	1.1936	1.37868	0.871364	0.766779	1.53015	1.49784	1.71564	1.3915	1.25494	1.03488	1.17108	1.0312	2.16388	1.12761	1.45251	1.21839	1.23505	1.25765	1.19578	1.02001	1.04542	1.04323	0.678572	1.45882
ENSG00000143093	2.75032	2.77667	2.4856	1.99376	2.62523	2.00751	2.25893	2.88721	2.10341	3.08969	2.44726	1.59568	2.31687	1.49388	2.29886	2.25674	2.39166	2.83963	2.03538	2.73229	2.72912	2.42022	2.08532	1.85706	2.56616	2.72969	1.82478	2.79901	2.68785	2.06746	2.62048	2.13976	2.5256	1.96938	2.74537	1.99877	2.00839	2.04118	3.2964	1.9368	2.35825	2.71972	1.89192	2.38546	3.08508	2.45497	2.53179	2.91783	2.17405
ENSG00000232382	0	0	0	0	0	0	0	0	0	0	0	0	0	0	0	0	0	0	0	0	0	0	0	0	0	0	0	0	0	0	0	0	0	0	0	0	0	0	0	0	0	0.0324732	0	0.0364065	0	0	0	0	0
ENSG00000167962	4.37468	4.08973	4.08251	3.33595	4.26282	3.75464	4.27868	4.56597	4.42146	4.72744	3.74667	3.95332	4.40366	4.28265	4.10598	3.04959	3.85168	5.3283	4.50073	4.48137	3.32187	4.06297	4.1797	3.43548	3.89321	3.61824	3.94747	4.03856	3.11025	4.21409	3.9002	3.53563	4.42666	3.51271	4.58136	4.40034	3.96139	3.06378	4.0658	4.53863	3.7247	4.42693	3.81768	4.69512	4.39694	5.1008	4.31074	4.0491	4.2972
ENSG00000204390	0.393585	0.436147	0.556945	1.14392	0.568136	0.677647	0.910382	1.03862	0.745633	0.156575	0.671995	0.131314	1.02608	0.466524	0.665343	0.645022	0.747832	0.849254	0.569808	0.696088	0.542683	0.786482	0.562656	0.468241	0.827183	0.540597	0.542291	0.298569	0.797538	0.756247	0.845377	1.07506	0.629933	0.709283	0.472716	0.323938	0.498731	0.833336	0.548708	0.335153	0.903293	0.355871	0.593238	0.400082	0.312969	0.355599	0.690493	0.628972	0.523118
ENSG00000167705	1.46305	1.7527	1.90516	2.40574	0.910599	2.00371	1.23708	2.26852	2.42779	1.34444	2.25466	2.28145	1.89465	2.9284	2.1629	1.81307	1.61774	1.22742	2.0579	1.54862	2.20277	1.20583	2.84696	1.50945	2.568	2.00879	2.02303	1.0684	1.8865	1.26396	2.61562	2.7856	1.89759	2.2557	1.44348	1.53519	1.98353	2.15714	1.85529	2.30126	2.37905	1.66316	2.09988	1.6165	1.2553	1.74417	1.31331	1.67665	0.925797
ENSG00000166862	0.0154416	0	0	0	0	0	0	0.00725548	0	0	0.0245001	0.053245	0.0094088	0	0	0.00467701	0	0.0472447	0.0218875	0.0058708	0.0237973	0.0160901	0	0	0.0192419	0	0	0.00483903	0	0	0.0320348	0	0.00654585	0	0.0122088	0	0	0.0104328	0.00808233	0.00957159	0.0435671	0	0.0853764	0	0	0	0	0	0.0429975
ENSG00000168970	1.06954	0.187727	1.38204	0.17695	0.973332	1.05769	0.523051	1.24409	1.22861	0.0602673	0.658335	0.0722988	1.12115	0.0749781	0.380773	0.147771	0.0771742	0.553893	0.541545	1.05207	0.27671	1.29743	0.490727	0.165883	0.0997367	0.435531	0.816505	0.41513	0.261878	0.507365	1.09048	0.139553	0.673449	0.622741	1.18839	0.784314	0.209812	0.123383	1.24394	0.156587	1.66677	0.57295	1.14159	0.531806	0.444243	0.687521	0.96913	0.113915	0.525226
ENSG00000170683	0	0	0	0	0	0	0.0471353	0.0219347	0	0	0.187492	0	0	0	0	0.0963534	0.0413608	0.0411049	0	0	0	0.0483465	0	0.046608	0	0	0	0.0146541	0.0263552	0	0	0	0	0	0.0726508	0	0	0	0.184684	0	0.103705	0	0	0	0	0	0	0	0
ENSG00000074657	1.78419	1.96732	3.17876	2.43998	2.30957	2.94209	2.80556	2.44921	2.58284	2.21023	2.66264	0.559056	2.76143	0.804213	3.05908	3.58312	2.33221	2.32198	3.18882	3.71804	2.07366	1.874	1.93958	2.79083	2.49011	3.28498	2.56194	2.9467	2.94347	3.72782	2.27025	3.67665	2.35428	2.51935	1.63334	2.40685	2.28221	1.76984	1.52343	1.80869	3.1355	3.39792	1.88803	2.78851	1.92479	1.61012	2.78973	2.70178	3.66468
ENSG00000137868	1.88315	0.948828	1.15938	1.21425	1.82416	5.51743	0.678314	0.661093	2.89016	0.0694295	2.12528	0.614149	1.39925	2.02246	0.866078	0.605393	0.827383	1.78341	0.845469	0.81478	4.02151	1.39592	4.05937	0.333975	0.792263	1.39287	0.54661	0.67048	1.76604	0.656427	1.3908	0.503005	1.59954	1.96545	0.337604	0.802383	2.89957	1.12874	0.356461	0.49594	1.43531	0.667001	0.764359	0.942873	0.545471	2.20071	1.99173	1.00706	2.03821
ENSG00000140937	0.946272	1.44492	3.69714	4.6041	1.2041	2.99573	2.01397	0.389307	3.4162	1.25271	3.19508	0.31215	2.11734	0.254601	2.7292	1.72355	1.12176	0.853325	2.44997	1.27714	2.77848	0.903117	0.886675	1.09957	3.21514	3.09432	2.91781	1.78302	1.7203	0.834454	1.3591	2.87373	3.8918	4.17105	1.2572	0.703614	4.07945	0.106939	1.19191	0.897518	2.55105	2.42085	2.00623	1.95246	0.50813	0.683307	1.27824	1.38221	3.91422
ENSG00000074370	0.920954	2.4228	2.42335	3.99592	1.00431	1.41363	0.615086	2.27332	3.51248	0.923688	2.82975	2.60174	3.70275	1.58104	2.61583	1.60247	1.94716	1.5665	2.98919	2.38316	1.89533	1.37555	1.84664	1.14101	4.49525	2.26282	1.44607	1.80158	2.12991	2.30795	4.5398	3.12881	3.73016	1.84392	0.818177	2.19637	2.47266	1.00101	1.20041	2.13234	3.70738	1.48943	2.07878	2.62418	2.19705	1.54282	1.9181	3.06181	1.25328
ENSG00000160224	0.00533974	0.00920199	0.078943	0.0196403	0.0106266	0	0.0162093	0.00500426	0.0768383	0	0.061127	0.024708	0.0573933	0	0.00533564	0.00322494	0	0.0234507	0.01512	0.0161267	0	0	0.0155092	0.00536183	0.0132887	0.0366803	0.0305354	0	0.00601988	0	0.00742246	0.0129029	0.0224324	0.066018	0.00842515	0.0131076	0.00922767	0.0143607	0.00557505	0.00660337	0.065552	0.00384556	0.0100674	0.00862023	0.00632182	0	0.0170981	0.0043242	0.00600332
ENSG00000145194	2.51012	1.49482	2.54129	2.73052	4.76538	1.74423	2.06018	2.09835	2.02928	2.77068	1.70922	2.44195	2.35644	4.04239	2.52122	1.52557	1.80965	2.63001	2.49342	1.85776	1.96543	2.73717	2.28353	3.99126	1.65105	1.79536	3.35744	1.75306	2.19802	2.21503	2.54577	1.07555	2.56303	2.86989	1.59445	2.45333	2.0402	2.78354	1.99278	3.26864	3.43899	2.18293	2.81141	2.22646	1.2258	2.03129	1.89845	1.54931	2.22553
ENSG00000135973	0	0	0	0	0.0376788	0	0.0383804	0	0.075052	0	0.0596984	0	0	0	0.0377666	0.0342568	0	0.0168256	0.0358195	0.0287342	0.0195957	0	0	0.0190997	0.0470081	0.102636	0	0	0.0214313	0	0	0.0153808	0	0.0299104	0.0299308	0	0.0327587	0	0.0394415	0	0	0	0	0	0.0225003	0.0387216	0	0.0457673	0
ENSG00000111727	1.30904	1.36735	1.67282	1.59437	1.75463	1.66384	1.5407	1.6522	1.48889	1.38546	1.54258	0.551194	1.37899	0.46263	1.6692	1.59093	1.67628	1.65974	1.56316	1.49701	2.02378	1.02172	1.48623	0.992851	1.82787	1.53226	1.3479	1.76915	1.59945	1.45004	1.71373	2.29485	1.62608	1.80997	1.38853	1.31846	1.42801	0.521347	1.47977	0.713743	1.76273	1.1412	1.37095	1.57462	1.0459	1.0539	1.81883	1.4308	1.30887
ENSG00000196757	1.85536	1.2454	0.754492	1.23409	2.11064	1.56757	1.80308	2.63594	2.18038	1.36091	1.69866	0.780921	1.65745	0.197004	1.4454	1.66164	1.24855	2.19248	1.85141	2.137	1.87621	2.06012	0.808613	0.939911	1.32562	1.46672	1.17264	1.57423	1.11171	3.1367	2.77203	1.30875	1.55327	1.51822	1.51053	1.92521	1.27495	0.571868	2.11581	0.973384	2.4819	1.57291	0.385119	1.65329	1.3871	1.85353	1.57668	1.36396	1.58413
ENSG00000140931	2.2026	2.59213	3.30819	3.97181	2.9586	3.09594	4.19034	2.41334	4.37288	2.61398	4.44649	3.04981	3.17893	3.11015	3.49504	4.46119	3.56665	1.42854	3.37432	2.35113	4.09444	2.11322	3.42495	1.96833	3.89637	4.3408	3.42718	3.0557	2.77745	3.21081	3.85218	3.83705	2.8012	4.49422	2.53578	2.06777	4.38515	3.00234	2.39045	4.17397	2.83669	3.87366	2.432	3.30856	1.71644	1.7868	3.93545	3.08267	3.69715
ENSG00000151498	1.20369	1.12486	1.49753	1.83035	1.68705	1.44578	1.71437	1.59722	2.11342	1.02041	1.76941	0.525356	1.59036	0.550517	1.35931	2.49655	1.40225	1.47523	2.35412	1.4498	1.70476	1.69727	0.932937	1.08359	1.50301	1.57761	1.76636	1.4736	1.72776	1.20648	1.8614	1.94155	1.66372	1.43209	1.1569	1.73938	0.996985	0.883432	1.43385	0.937638	2.20473	1.30288	1.0406	1.6334	1.36136	2.01011	1.88051	1.80961	1.53501
ENSG00000109705	0.0866878	0.247339	0.560606	1.48585	0.401661	0.488305	0.0180362	0.23155	1.71912	0.00749115	1.37308	0.0611179	0.421048	0.268909	0.253183	0.343805	0.121857	0.0234989	0.850822	0.117005	0.700756	0.0185044	0.0511657	0.18499	0.541919	0.664386	0.722647	0.0055684	0.0100399	0.2289	0.024645	0.195395	0.582324	0.726769	0.147437	0.136295	0.863791	0	0.125029	0.491676	0.225753	0.357085	0.395908	0.163638	0	0.156062	0.188247	0.00721468	0.222977
ENSG00000175538	0.24365	0.577741	5.78408	3.94032	0.475432	1.18807	0.264531	0.663139	1.434	0.348951	1.43667	0.590198	3.99966	0.475298	0.771537	0.785055	1.09285	0.708236	1.10316	0.885448	1.42847	0.936981	0.900165	3.11671	1.35939	1.5905	3.05481	0.571501	0.904911	0.557308	2.0324	1.3093	5.90219	2.39077	0.219006	0.858225	0.973271	0.432955	0.259464	0.547038	3.03544	0.503524	5.20096	1.14056	0.392732	0.511423	0.649648	0.65338	1.94838
ENSG00000188909	0	0	0.0251862	0	0.0297484	0	0	0	0	0	0	0	0	0	0	0	0	0	0	0	0	0	0	0	0	0	0	0	0	0	0	0	0	0	0	0	0	0	0	0	0	0.0215414	0.0829773	0	0	0	0	0	0
ENSG00000167555	0.0826668	0.153537	0.277971	0.808756	0.141941	0.742936	0.0726369	0.686872	0.966849	0.0244543	0.549843	0.232974	0.912924	0.0656823	0.514759	1.59694	0.0959035	0.675142	1.38623	1.96195	0.579675	0.514127	0.107093	0.0995917	0.934273	1.79786	0.371036	0.185417	1.04546	0.183334	0.481332	0.891908	0.375569	0.776175	1.22813	0.848682	0.431227	0.610397	0.0919697	0.448698	0.620753	1.67082	0.122114	1.08457	0.0343342	0.647887	0.338908	0.211684	0.114135
ENSG00000103226	0.314051	0.572003	1.05863	0.711978	0.829819	0.792686	0.399891	0.734671	0.541514	0.662978	0.371438	0	0.677291	0.00384374	0.509105	0.667523	0.384958	0.0653333	1.33509	0.661315	0.292385	0.183292	0.411406	1.05217	0.674847	0.739607	0.210669	1.12403	0.322613	0.78194	0.404589	0.948233	0.680298	0.609902	0.357802	0.245821	1.37946	0.00813688	0.0618195	0.0185898	1.10543	1.02625	0.156806	0.766711	0.285104	0.325998	0.846999	0.810275	1.03501
ENSG00000117650	2.19048	2.30907	3.39653	3.11181	2.18518	2.27534	3.54166	3.94837	2.31726	3.0731	1.17301	1.94819	2.73488	2.5289	1.77372	3.14689	2.54488	3.75474	3.17065	3.48139	2.20999	3.26981	3.56847	2.97357	2.30165	2.5173	2.58305	2.22707	3.17416	3.82737	4.06597	1.55	2.87357	2.89192	2.5704	2.60162	2.41293	1.56467	1.85902	2.15032	3.8268	2.95031	3.19958	3.03903	1.58078	3.28424	3.02109	2.11143	2.67695
ENSG00000164932	3.72344	3.87717	5.51358	6.92197	4.92899	6.08615	3.41581	3.0727	6.36477	2.74905	6.94083	3.18569	4.75743	4.59721	4.99544	5.37918	2.78089	1.56965	5.23171	2.86921	6.24749	2.89404	3.5431	2.52278	4.64363	5.0391	5.57211	2.72889	3.1061	4.09016	3.34058	5.00315	4.94299	6.68364	2.32068	2.68552	6.27872	1.82488	2.30053	4.09045	4.89544	4.71674	3.28708	4.25834	1.63472	2.75822	3.50027	1.94944	3.83804
ENSG00000169564	6.73358	7.38593	7.07612	6.85175	6.47129	7.27591	6.87273	7.39077	6.995	7.12777	6.51029	1.41268	7.66749	3.74406	7.79854	6.52581	6.97366	7.70253	6.61225	7.01466	6.59439	6.44044	7.70044	7.27943	7.06482	6.71307	6.87696	6.80759	6.9361	7.15992	7.48444	7.02822	7.11912	6.40889	7.16134	6.53939	7.14384	3.84641	6.72651	5.1025	7.59394	7.49551	7.22984	7.07724	7.20072	6.99795	7.33291	7.15838	7.19791
ENSG00000070269	0.85057	0.810786	3.16249	1.78121	1.5889	2.15068	1.04578	2.36899	1.34701	0.853595	1.54986	0.709545	1.97847	1.8121	1.92701	1.73907	1.42484	1.63114	1.45474	1.58356	1.43033	1.66908	0.919134	2.92458	1.418	1.72237	2.45937	1.34991	1.61282	1.29986	1.65169	0.961235	1.78529	2.48019	1.12015	1.3104	1.48668	0.629965	1.92205	1.14336	2.22459	2.17779	2.7438	1.14946	0.842833	1.15299	0.881589	1.384	2.42721
ENSG00000165632	1.76391	1.57302	2.24984	2.46659	1.56349	2.35647	1.53533	1.79309	1.84705	1.62019	1.87171	1.72484	1.83843	2.61986	2.37897	1.49018	2.20088	2.21055	1.45415	2.29965	1.29226	2.10769	2.00469	1.86334	1.75374	1.93681	1.57132	1.96071	2.2864	2.0146	2.75703	2.29332	1.98701	1.86447	1.39555	1.34368	2.1144	2.67008	1.67005	1.9182	2.81263	2.06807	1.81616	2.16209	1.61048	1.63308	2.02833	1.83399	1.66269
ENSG00000251493	2.35454	1.74692	2.84253	1.26823	2.23927	1.88206	4.23139	1.88678	1.93017	2.25491	2.40755	1.31951	1.7187	3.02651	1.51329	2.46214	2.33412	0.831644	1.70446	0.458786	1.7561	0.451812	1.64411	2.22365	1.47442	2.17594	2.1413	1.5401	0.831775	0.578943	1.84069	1.89694	2.74208	1.48202	2.20874	1.79711	2.0597	0.373067	2.27474	1.51145	2.68094	2.26293	2.28635	2.49332	1.85774	0.966931	1.97342	1.83856	1.79083
ENSG00000131480	1.05465	0.109508	0.280426	0.568178	0.406438	0.377191	0.405904	0.425019	0.743469	0.519603	0.556856	0.145931	0.251619	0.301724	0.126087	0.10415	0.341553	0.703974	0.304459	0.248554	0.257112	0.184071	0.131123	0.320905	0.207612	0.262416	0.759563	0.202688	0.388684	0.446276	0.295181	0.935171	1.52412	0.194425	0.220319	0.214984	0.0946198	0.0982199	0.193019	0.205974	0.448452	0.207989	0.839201	0.621171	0.107446	0.247734	0.19778	0.138049	0.435518
ENSG00000109323	1.88091	2.27623	2.54869	2.27288	2.40544	2.57175	1.99501	2.37369	1.99404	1.76728	3.25082	1.35139	1.67366	2.29766	1.48525	5.22263	1.69527	1.57042	3.1433	2.4541	2.51173	2.51779	1.18298	3.18964	2.18195	2.70925	2.48408	1.52328	2.66591	1.54384	1.58041	1.62003	2.32151	2.91378	2.69638	2.23087	2.0042	2.32649	1.38883	1.86002	2.47501	1.69362	2.62704	1.7792	1.31626	2.84948	1.56074	1.50122	2.23385
ENSG00000108602	0.555129	2.19272	8.1348	8.67506	1.60572	4.78683	1.49861	5.54926	3.75858	1.17264	0.315318	3.71222	9.09177	1.81027	4.46612	1.95818	1.24034	4.86747	1.80523	4.70048	2.20287	5.03246	1.54522	9.38523	2.04307	1.15295	9.11346	2.95032	5.97937	1.00573	6.95535	1.03897	7.46888	7.50076	3.14164	8.50958	2.73755	2.79541	3.01969	2.35434	6.5341	4.06658	9.59999	4.41763	3.15665	7.13959	2.97342	4.56101	6.17722
ENSG00000171159	4.48786	4.37116	4.43574	4.94591	5.02212	4.86837	4.71606	5.52045	5.22311	4.36768	4.23497	7.3584	4.86047	5.76389	3.74866	3.63018	4.66341	4.70352	4.00933	5.36727	5.46141	5.34556	5.16809	5.14596	4.75664	4.3976	5.38077	3.97	4.06078	3.91042	4.72366	4.31328	4.47865	4.4114	4.3519	4.43914	3.76717	5.80532	4.86215	6.57344	4.32762	3.67665	5.10305	5.11136	4.02485	5.19535	4.37491	4.69861	4.36378
ENSG00000149575	0.0630351	0.0616682	0.0286705	0.312814	0.0504912	0.379888	0.00435631	0.0630065	0.238411	0.131076	0.284503	0.178575	0.0563456	0.690451	1.12704	1.62667	0.022744	0.0337722	0.263284	0.0417115	0.0775473	0.0266144	0.237997	0	0.272674	0.184555	0.0487273	0.19303	0.0754905	0.0607195	0.0354132	0.513998	0.0846041	0.190284	0.0202121	0.0519181	0.161567	0.0843965	0.0614642	0.225826	0.135408	0.31287	0.0360496	0.454734	0.0791829	0.0518822	0.138178	0.0343609	0.0752877
ENSG00000213145	0.787404	0.33914	0.442345	1.65546	0.306372	0.64461	1.42622	1.94558	2.20592	0.718506	0.847948	2.92002	1.61484	1.85261	0.702886	0.377519	0.66324	0.6599	1.31084	0.876455	0.707482	1.53909	0.618977	1.23008	2.10761	1.36211	0.738517	0.48648	0.618481	0.937165	2.03133	1.40999	1.43881	0.797604	1.00241	0.91444	0.692466	1.35787	0.928877	2.30142	1.15388	0.58249	0.501052	1.83683	0.767828	0.626384	0.489519	1.24337	1.47199
ENSG00000132128	3.03346	3.11303	3.42389	3.19236	3.80532	3.41381	2.82047	4.0908	3.797	3.873	3.28755	2.67891	3.45243	2.00219	3.29596	3.44731	3.63255	3.91506	3.98551	3.30982	3.87153	3.3471	3.16676	4.23815	3.42905	3.28475	3.17548	3.46141	4.11545	3.10239	3.03566	3.14129	4.07442	4.35302	3.8413	3.95109	4.24828	1.82574	4.00451	3.53583	4.32866	3.24382	3.14083	3.59601	3.26925	3.90263	3.94726	3.75127	3.88877
ENSG00000196954	2.66627	4.26341	2.56152	3.04939	3.96385	2.77207	3.87699	2.59036	3.01994	4.22472	3.01432	3.04437	2.64261	1.91858	3.37618	3.33126	4.38945	3.31114	4.59574	3.78964	4.82978	2.68183	2.77482	2.66202	4.42977	3.58978	1.98935	4.47837	3.16663	2.6399	2.7732	3.09702	2.5968	2.97108	3.35027	3.33542	2.82609	2.45056	4.61862	3.08857	3.31942	3.28263	2.19396	3.13701	4.59775	3.52427	3.49229	4.30215	1.45667
ENSG00000205078	0.460994	0.239356	0.623404	1.16159	0.558384	1.27952	0.78434	1.79475	1.40365	0.42216	0.616028	3.21444	0.70258	1.99955	0.338834	0.315039	0.20017	0.601838	1.01212	0.508641	0.247056	2.39853	0.478078	0.520103	0.252641	0.55071	0.8386	0.165948	0.268327	0.667627	1.64784	0.602176	0.984192	0.233982	1.10117	0.709239	0.406806	0.884731	0.971548	2.83971	0.893857	0.390829	0.932431	0.783382	0.498615	0.70379	0.442182	0.168859	0.586671
ENSG00000186184	3.44915	4.01705	4.05726	4.09851	4.293	4.05501	4.47462	4.53527	3.60058	4.03033	3.89832	3.37081	3.72323	5.22814	3.49791	3.93402	4.23812	3.30793	3.46314	3.78686	3.56165	4.75187	4.78802	4.65029	3.24986	3.29786	4.22754	3.99295	3.50553	4.28627	4.31782	3.49517	3.82652	3.63171	3.72252	4.27482	3.45086	4.07835	3.95745	3.56791	3.67284	3.58067	4.12941	3.32659	4.49512	3.75379	4.14859	3.73294	4.11249
ENSG00000132749	0.587441	0.475095	0.970689	0.938137	0.557155	2.77443	0.773842	0.548524	0.455143	0.500785	0.226998	0.360638	2.95992	2.05654	0.584213	1.21247	0.138179	0.717203	0.958664	0.171477	0.0941188	0.90615	2.09935	0.8241	0.276801	0.481832	0.618473	0.395822	0.7491	1.04506	0.632443	0.346399	1.30621	0.898163	0.546291	0.362292	0.190952	0.194607	0.219801	0.602901	1.85727	0.282379	1.04364	1.2389	0.301531	1.79183	0.7351	0.512087	0.801082
ENSG00000128482	0.192188	0.0748843	0.374272	0.152115	0.0470429	0.290566	0.054633	0.146423	0.738878	0.158069	0.352983	0.655621	0.17996	0.931031	0.0668978	0.099853	0.0121391	0.082398	0.359974	0.109955	0.0956127	0.0422276	0.0263886	0.0606364	0.10708	0.0921677	0.343155	0.0545825	0.075274	0.178714	0.144981	0.312271	0.60206	0.0634801	0.104369	0.151943	0.0807059	0.329164	0.110167	0.384686	0.289174	0.0627385	0.437561	0.0859865	0.00809291	0.0819038	0.116355	0.0110523	0.22105
ENSG00000132341	6.51943	6.27581	5.90723	5.87303	6.37091	5.35367	6.91956	6.21809	5.97199	5.51138	5.8971	5.61145	5.9054	5.79941	5.85842	6.04869	6.62288	6.39702	6.05681	5.97268	6.53793	6.75034	6.4723	6.54516	5.93143	6.1757	6.27023	6.18779	6.28947	6.74087	6.22399	5.81022	6.60603	6.03212	6.61087	6.85522	5.99828	6.17693	6.09933	6.10421	6.55864	6.03759	6.62097	6.29343	5.99976	6.39665	6.37611	6.05105	6.26157
ENSG00000162976	2.09716	2.00233	3.69496	4.30531	3.48648	2.75469	3.71625	4.05846	3.25689	1.73409	3.07088	0.697409	3.3463	1.39509	3.10496	3.66436	3.24657	2.32286	2.07747	2.00175	3.4627	2.66454	3.81282	3.66228	3.55934	2.85972	3.36314	3.1751	3.25236	2.2611	3.27126	2.78252	2.81263	3.49236	2.8143	2.08954	2.85748	1.38669	2.82589	2.46676	2.63749	2.49088	2.65015	2.66916	2.70231	3.1727	3.22076	2.96386	2.50193
ENSG00000221988	1.98618	2.63526	1.65891	1.85775	1.91242	1.69851	1.8579	1.46081	2.21412	2.08027	2.4532	2.79998	2.00487	1.72791	2.48961	2.28409	1.82376	1.91226	2.20294	1.86499	1.98797	2.51047	1.8212	1.58047	1.92506	2.09413	2.10486	2.0973	2.01929	1.11089	1.7814	2.51049	1.98448	1.66444	2.90604	1.64502	1.39702	1.42186	2.14176	1.93544	2.57427	2.01009	2.14608	2.66449	1.61088	2.75368	1.80901	1.93644	2.14089
ENSG00000268434	0.0288431	0	0	0.0700641	0	0.0346703	0	0.0270448	0	0.0947791	0.0898801	0	0.0350005	0	0	0.0347428	0	0	0.027331	0	0.0588223	0	0.0280314	0.0289615	0.07093	0.153401	0	0	0	0.123938	0	0.257852	0	0.0452671	0	0.0354154	0.0495529	0	0.0301035	0	0.0649212	0.101217	0	0.0463331	0.0674071	0	0.04609	0	0.0640785
ENSG00000092621	3.36105	2.02389	3.56869	3.7626	2.89067	3.57514	0.480127	3.29293	2.81674	2.91879	2.56497	3.24711	5.38417	3.8358	3.22481	1.59206	0.975287	2.73115	2.48378	2.9133	1.75891	4.81921	1.26661	4.81442	1.56727	1.49416	4.00043	3.46216	3.46255	2.70189	4.25545	0.811473	3.65143	2.56056	3.02929	2.85575	2.01745	5.3016	2.92195	3.2671	4.84501	3.56455	4.11589	2.77492	2.57146	2.91441	2.556	0.997551	4.98814
ENSG00000008300	0.16032	0.174254	0.872886	0.259667	0.245768	0.277807	1.40099	0.55336	0.288484	0.222959	0.533179	0.185082	0.968221	1.41376	1.54057	2.11691	0.166508	0.20063	1.50541	1.92787	0.144891	2.11119	0.176308	0.457226	1.58352	0.813259	0.64796	0.772461	0.139493	1.59542	1.50776	0.71919	0.646531	0.259859	0.164109	0.585068	1.74173	0.112312	0.375926	0.482916	0.60689	0.639709	0.381002	0.211169	1.50323	1.32889	0.195001	1.95596	1.34144
ENSG00000268750	0.104113	0.158622	0.324508	0.151401	0.255754	0.171448	0.33162	0.206984	0.13798	0.294508	0.131307	0	0.263284	0.0801613	0.256307	0.435382	0.0748474	0.454606	0.226626	0.385436	0.127673	0.0873202	0.0815655	0.362381	0.269539	0.436571	0.229808	0.335354	0.116877	0.15879	0.0297276	0.117174	0.235236	0.191237	0.161179	0.0775949	0.361644	0	0.14977	0	0.095219	0.495059	0.374928	0.312538	0.12251	0.0435922	0.311039	0.164992	0.285458
ENSG00000158246	6.18346	5.99002	1.12775	2.64873	3.98405	3.68265	4.41157	3.8946	3.01496	4.2047	3.58198	5.00163	2.1238	4.59814	5.15352	4.732	3.31317	5.10393	5.8688	5.67973	4.55833	4.03219	2.14746	1.46363	4.61522	5.31042	2.68201	4.45857	3.6748	5.09626	2.27244	2.0746	3.3169	1.14669	6.12487	5.799	3.19688	5.11625	6.51317	5.03609	1.91839	4.91677	0.52875	3.93785	4.78293	3.12391	3.96586	5.87761	1.62485
ENSG00000151572	0.0198947	0.0839314	0.0415961	0.0183945	0.0149003	0.0298496	0.0101377	0.0186506	0.0266195	0.0208978	0.102548	0.0683449	0.0828393	0.185154	0.337564	0.102087	0	0.0306582	0.0829444	0.0918971	0.206401	0.0309826	0.173976	0.818343	0.148329	0.139141	0.0787075	0.0339968	0.0444859	0.011081	0.0613746	0.043817	0.0661847	0.121239	0.292552	0.0244452	0.0426934	0.230517	0.0310392	0.00618273	0.0992425	0.827493	0.394699	0.974521	0.124919	0.0102287	0.29725	0.039983	0.00562083
ENSG00000096093	0.728019	0.505926	1.70908	0.786745	1.03752	0.694615	1.3364	2.10051	1.39719	0.291558	1.42816	0.755524	1.30435	0.508166	0.441676	1.4477	0.445644	0.650257	1.02468	1.17111	1.15565	1.30989	0.916209	0.678716	0.745834	1.15564	0.797198	0.53374	0.753193	0.500014	0.811211	0.762413	1.79273	1.19911	0.838404	1.50088	0.821286	0.483967	0.801995	0.956722	1.97807	0.647633	1.65313	1.04047	0.386174	0.581528	1.44823	0.467106	2.14699
ENSG00000146215	0.030286	0	0.0996409	0.143469	0.0499753	0.024369	0.128784	0.136712	0.167732	0.00855075	0.084102	0.0467592	0.152889	0	0.0302629	0.0244202	0	0.0179231	0.0475191	0.0531319	0.0817374	0.141671	0.0582796	0.0203445	0.0252372	0.0141005	0.0463306	0.00635663	0.0228269	0.055566	0.148224	0.00821554	0.0508308	0.031852	0.0475503	0.108791	0.0520132	0	0.0211492	0.012567	0.0791747	0.00732484	0.18084	0.0486362	0.0120322	0	0.0324337	0.0326628	0.0114271
ENSG00000150787	2.08099	3.23873	2.16923	2.51736	3.27078	2.12353	2.93079	2.38031	2.88453	2.538	2.36832	1.98405	2.11414	2.38913	2.59703	3.37318	3.1275	2.11795	3.44404	2.46668	3.59707	2.79926	2.07169	2.4275	2.63551	2.23103	2.83688	2.77142	2.86653	2.09984	1.82225	2.66333	3.24391	3.4361	2.31191	3.34189	2.88405	2.20266	2.98461	2.76566	3.00534	2.55844	2.67344	2.9364	2.62575	4.05575	2.9498	2.51594	2.71075
ENSG00000033050	4.35804	4.39211	4.70526	3.89411	4.33331	3.70111	4.64384	3.35178	4.24772	4.82382	3.81942	3.38248	3.90276	3.38183	4.7379	4.73118	4.52567	5.15831	3.40085	3.35351	4.17937	4.66139	4.20513	4.60962	4.65862	4.51002	4.92148	4.52707	4.47654	3.64322	4.40429	4.60677	4.58341	4.88566	4.28434	4.40539	3.73581	3.75927	4.18233	3.85026	4.03758	4.34492	4.57697	4.44162	4.16966	4.61897	4.81614	4.32322	4.73253
ENSG00000276911	0	0	0	0	0	0	0	0	0	0	0	0	0	0	0	0	0	0	0	0	0	0	0	0	0	0	0	0	0	0	0	0	0	0	0	0	0	0	0	0	0	0	0	0	0	0	0	0	0
ENSG00000277481	0.00959509	0	0.00808965	0.0409308	0	0.00578613	0.0145931	0.0661203	0.0255944	0.00404074	0.0452509	0.107974	0.0174549	0	0.0143578	0.0201931	0.0254629	0.0211178	0.00908886	0.0181257	0.0245886	0.019929	0.0139625	0.00482541	0.0472661	0.0395657	0.0165655	0.0119734	0	0.021226	0.0461257	0.0608938	0.0321857	0.0151161	0.00758307	0.0117994	0.00415878	0	0.0100173	0.0236265	0.0325448	0.0137931	0.04475	0.0154759	0	0.00983262	0.00771744	0	0.0426666
ENSG00000196950	1.42505	1.21674	3.5675	3.03447	1.72136	1.80279	2.11407	2.58683	2.08712	1.29177	1.85323	0.766332	2.19545	1.98486	2.19009	3.27925	2.1417	1.60688	2.20331	1.86691	1.95072	1.81327	1.28975	2.49209	2.16033	2.44938	1.99911	2.10313	2.20426	1.62964	1.31387	1.70585	2.28215	2.44709	1.14799	1.623	1.93139	0.58884	1.88434	0.91873	2.68871	1.87711	1.74373	2.0849	1.92628	1.53953	1.50095	1.67471	1.9421
ENSG00000186146	0	0	0	0	0	0	0	0	0	0	0	0	0	0	0	0	0	0	0	0	0	0	0	0	0	0	0	0	0	0	0	0	0	0	0	0	0	0	0	0	0	0	0	0	0	0	0	0	0
ENSG00000275379	0.116911	0	0	0.142749	0	0	0.118672	0	0	0.0989023	0.123755	0.668872	0	0.215519	0.224895	0	0.201836	0.153046	0.110956	0	0	0.121646	0.0579785	0.172668	0	0	0	0.0741085	0	0.189812	0.160171	0.0483538	0.0505675	0	0	0.208921	0.149976	0	0.234226	0.33466	0.0677758	0.348705	0	0	0	0.119698	0.0947067	0.0484685	0.130829
ENSG00000198211	0	0	0.0151137	0	0.00895897	0	0	0	0	0	0.00953407	0	0	0	0	0.0162302	0	0	0	0.00681602	0.0184594	0.108559	0	0.0269046	0.0223233	0.024827	0	0	0	0.00997711	0	0	0.0151591	0	0	0.0110521	0.0535919	0	0	0	0	0.0257254	0	0	0	0	0	0	0.0201341
ENSG00000161911	0.0978548	0.138711	0.109497	0.60297	0.315992	0.342191	0.207199	0.150049	0.57173	0.160911	0.581547	0.98608	0.295827	0.255196	0.174491	0.473271	0.24765	0.195022	0.352696	0.399583	0.680432	0.134255	0.0951639	0.0662356	0.702724	0.295653	0.0572574	0.303028	0.24447	0.142636	0.723195	0.2724	0.30716	0.565623	0.670123	0.898169	0.404741	0.37827	0.620479	0.300463	0.471531	0.605973	0.151139	0.294961	0.204618	0	0.129636	0.167481	0.0558348
ENSG00000128340	3.88863	4.4467	4.61413	5.17017	4.79483	4.86115	5.76808	3.73824	5.57267	5.01631	5.34534	5.25836	4.95345	3.50105	3.68904	4.43368	6.04188	3.18043	4.75412	5.0702	5.54646	1.49242	5.05958	3.40553	6.33639	4.6404	4.36696	5.59504	3.30511	4.56005	6.3482	4.62072	4.86184	5.20939	4.10244	2.36641	3.55417	2.39512	3.58948	4.19771	4.69827	3.92854	4.27875	4.71518	4.09503	2.64426	4.95932	5.73783	2.69029
ENSG00000144821	0.0385127	0.0387638	0.133419	0.0277846	0.0941347	0.0194565	0.398676	0.220065	0.0387355	0.0667861	0.0739978	0.157727	0.0428666	0.052828	0.0510865	0.100458	0.287576	0.0143036	0.0274611	0.0220165	0.0526512	0.190279	0.015715	0	0.0980526	0.154101	0.0695956	0.0321369	0.0109616	0.0601368	0.0489306	0.31496	0.05131	0.0304797	0.104045	0.0703107	0.02234	0.0601532	0.0235798	0.00401849	0.0687651	0.0573749	0.0979492	0.0414535	0.0304926	0.00665144	0.442343	0.0942756	0.0217807
ENSG00000151304	1.84509	2.14422	2.52126	2.16674	2.45127	2.09445	2.85505	2.28905	1.67065	2.5101	1.72053	0.553401	1.97922	0.74335	2.12789	2.35771	2.42341	2.4875	2.19045	2.57862	2.46358	1.06524	1.88669	1.87605	2.34594	2.51312	1.93514	2.59744	2.30701	2.14344	2.40516	2.54502	2.13061	2.3002	1.60978	1.47723	1.6802	0.3457	1.98462	1.08708	2.34472	2.13072	2.07977	2.3352	1.90577	1.93466	2.5702	2.37666	1.91751
ENSG00000165410	2.27052	1.14894	2.32102	1.86425	1.32091	1.72844	0.924655	1.25441	1.49466	2.14621	2.64108	1.05698	2.01374	1.21927	2.03396	1.7914	1.55933	0.740377	0.916778	1.83337	2.45719	0.86071	1.53566	0.696999	2.14664	3.11855	2.43645	1.59471	1.42137	1.62528	1.26803	4.83625	1.42923	1.71401	1.73634	1.61668	1.39429	0.304129	2.48331	0.979331	1.61732	1.95029	1.72636	2.03174	1.4252	0.66394	1.90544	1.41814	1.77213
ENSG00000118503	5.05458	4.60615	3.93152	4.05949	3.70456	3.70592	5.3173	4.66857	3.93861	5.22112	5.11474	2.46453	3.93149	2.34532	3.86717	3.77969	3.42222	4.90753	4.73073	4.40384	4.36659	2.12582	3.31985	1.94298	5.88387	3.67706	2.967	4.34254	5.50632	3.11854	4.29507	3.3394	3.4734	3.69397	5.16245	2.85564	4.84115	2.33064	4.17572	3.21889	3.99981	4.19681	4.03332	6.86774	2.19765	4.13273	4.64284	4.21364	4.17303
ENSG00000175352	0.391036	0.72544	1.19788	1.16283	1.19647	1.33935	1.20373	2.36165	1.25243	0.488707	1.28275	1.32154	0.397488	0.900963	0.581179	2.82295	0.512592	1.27533	0.318511	3.40694	1.5159	1.46151	1.02735	1.81645	1.32877	0.848438	1.52046	0.735247	2.0299	1.94317	2.01134	1.52723	1.27855	1.96912	0.824452	0.252871	1.50317	0.627437	0.542874	0.327747	0.777724	0.655712	0.784937	1.06209	1.67464	0.771568	0.434774	1.06107	1.58558
ENSG00000178385	0.525689	0.433363	1.3004	0.728087	0.490389	0.765559	0.577177	1.05087	0.327488	0.787926	0.370203	0.0732254	1.03001	0.179823	1.33278	1.37526	0.523484	1.39509	0.480455	1.54457	0.569195	0.148898	0.608679	0.765174	1.04257	0.820343	0.412488	1.34092	0.993833	0.416989	0.958444	0.823941	1.05226	0.719721	0.852953	0.297779	1.06541	0.0428588	0.382311	0.163294	1.1441	0.879215	0.570914	0.717455	0.518442	0.505887	1.12027	0.990031	0.939237
ENSG00000260596	0	0	0	0	0	0	0	0	0	0	0	0	0	0	0	0	0	0	0	0	0	0	0	0	0	0	0.0141122	0	0	0	0	0	0.0103517	0	0	0	0	0	0	0	0	0	0	0	0	0	0	0.00991621	0
ENSG00000198520	0.171228	0.073135	0.0966043	0.778709	0.13529	0.101101	0.0473842	0.134285	0.994216	0.0522021	0.29482	0.283267	0.254864	0.489934	0.09919	0.0607196	0.370055	0.139729	0.259642	0.120616	0.225726	0.641188	0.0820977	0.0922346	0.277305	0.357902	0.0711738	0.0674994	0.086489	0.307201	0.823563	0.27785	0.379627	0.391033	0.0848515	0.0665367	0.111818	0.22649	0.532296	0.421076	0.321657	0.109529	0.361251	0.224344	0.125445	0.124118	0.144952	0.151709	0.127526
ENSG00000168078	2.07481	2.84264	4.17104	2.57431	2.12783	3.12757	3.41959	3.45655	2.22827	2.76105	1.39166	3.29403	3.368	2.40669	1.58569	3.17499	3.64741	3.73272	2.90602	3.42244	1.98689	3.74692	3.77164	2.82258	1.93328	2.647	3.31311	2.44038	2.42327	3.9337	4.18211	2.06024	3.23949	3.25154	3.06225	3.39035	2.3038	1.39615	1.46739	2.05732	3.41176	1.96807	4.58444	4.14394	1.92211	3.28587	3.73062	2.81129	3.05591
ENSG00000140836	0.846231	0.780242	2.3673	1.57327	0.621467	1.6845	1.73303	1.96598	1.0459	1.25023	1.21266	0.688599	1.85122	0.449671	1.59322	2.17857	1.10163	1.52468	0.884886	1.44599	0.625988	0.686535	0.75077	1.43335	1.21378	1.7803	1.13114	1.76604	1.761	0.447004	1.22481	1.58693	1.97179	1.92722	1.14611	1.24544	2.3078	0.600291	1.09016	0.640724	2.09988	1.51408	1.19504	1.39976	1.29942	1.06827	0.963136	1.07804	1.59054
ENSG00000165805	0.0044548	0	0	0	0	0	0	0	0.00597142	0	0.00472647	0.0308444	0	0	0	0.00269016	0.0079153	0	0.00421937	0.00674691	0.00459	0.00927034	0.0043284	0.0133783	0.00555637	0	0.0255116	0	0.00502242	0.00494648	0.0185001	0	0.00376612	0.0140165	0.00703012	0	0.00770011	0.121154	0	0.0273391	0.0101339	0.0127893	0.0209121	0	0.00527442	0.036124	0	0	0
ENSG00000165617	1.03076	1.19744	1.3974	2.20571	0.989814	2.30218	0.509734	0.217738	2.19217	0.237099	3.02085	0.194057	0.777465	0.27667	1.4789	1.27357	0.318942	0.053198	1.15664	0.340777	2.71832	0.235317	0.814115	1.41582	1.74312	2.56701	2.18666	0.280611	0.193788	0.54506	0.261641	2.68103	1.46808	2.90228	0.462927	0.445031	2.9878	0.00749882	0.255354	0.636398	0.8976	2.44756	0.778201	1.61964	0.185566	0.23169	1.29836	0.354279	1.8437
ENSG00000148337	4.21699	3.77562	4.9933	4.05723	4.84937	4.60583	4.38554	5.0118	4.36963	5.49786	4.30245	4.60728	4.65494	3.90303	4.20688	4.12801	4.21487	4.54764	4.32565	5.28035	4.11689	5.05921	4.90359	4.42466	4.55718	4.92786	4.42586	4.06628	4.19004	4.47885	5.16428	4.39808	5.00932	4.50668	4.72965	4.15108	3.80038	4.65962	4.46431	4.07776	4.44375	4.64117	4.92978	5.27602	4.15714	4.79944	4.33718	4.61001	4.29292
ENSG00000117298	4.40092	4.07647	4.6649	4.67096	4.7993	5.19515	3.80597	5.77594	5.45447	3.81769	5.41065	3.16681	6.13843	3.20979	4.57457	5.84634	3.52408	4.00559	5.88115	5.61225	4.13401	3.62848	4.6766	5.54979	5.25195	5.04084	6.18238	4.55863	5.90175	4.67594	5.14497	5.02124	6.0495	5.8386	3.76033	4.52909	6.26932	4.24014	3.61633	4.00562	4.67832	4.83029	4.41185	5.52196	2.84429	3.90138	4.63102	4.61255	7.064
ENSG00000125815	0.105119	0.0462913	0	0.0332045	0	0	0.054341	0.0253218	0	0	0.0567225	0.233949	0.0648246	0	0	0	0	0	0.123638	0	0.159399	0	0	0.0798697	0.0664747	0	0	0	0.0602072	0	0.211274	0	0	0	0.200669	0	0	0.35657	0	0	0	0	0.0752267	0	0.0631683	0.158584	0	0	0
ENSG00000013375	2.104	2.55148	3.02647	2.43606	2.68625	1.61191	2.60867	2.58215	2.28938	2.85803	3.30166	1.42817	2.44979	1.80891	3.23892	2.80825	2.42294	2.40136	3.03338	2.71872	2.98646	2.03932	2.38745	2.48414	3.42737	2.66913	2.21152	2.73657	3.31347	2.22555	2.07068	2.19564	2.32067	3.14203	2.50029	2.52642	3.32914	1.20059	2.30408	2.12491	3.32413	2.95536	2.44813	2.77323	1.50453	2.90599	2.74962	2.28592	3.14922
ENSG00000169189	3.01128	3.35866	2.90132	3.62974	3.36164	3.43494	3.99507	3.34084	3.82022	3.00155	3.53354	5.82301	3.41986	5.65382	3.06206	3.08184	3.44571	3.34753	3.85233	2.88252	3.7632	4.60381	4.34142	4.21496	3.58012	3.19144	3.36318	3.19759	3.37078	3.50495	3.6089	3.56276	3.31729	3.50544	3.16902	3.87195	3.31056	6.32076	3.08657	5.55725	2.74641	3.02513	2.89842	3.10931	2.85152	3.29125	3.69358	2.94433	3.0631
ENSG00000203663	0	0.0673863	0	0	0.351893	0	0.201766	0.0247603	0	0	0.108901	0.060778	0	0	0	0	0	0	0.575192	0	0.080118	0	0	0	0.127238	0.106982	0	0.12735	0	0	0	0.0424165	0	0.0414654	0.121063	0.0324318	0	0	0	0.214106	0	0	0	0.200733	0.121033	0	0.161938	0.0214153	0
ENSG00000069206	0	0	0.0462895	0.0406903	0	0.00670811	0.0056588	0	0	0	0	0.051094	0.0269018	0	0	0	0	0.00983469	0	0	0.0171537	0	0.00541353	0	0	0	0	0	0	0	0	0	0	0.00878447	0	0	0	0	0	0	0.00634794	0	0.066946	0	0	0.0113968	0.00894621	0	0.00626389
ENSG00000064655	0.353978	1.24443	2.72855	3.23001	1.37383	3.39225	0.020924	4.60071	2.92915	0.293608	1.65624	0.123452	4.11335	0.450025	0.427539	0.17289	2.02217	1.14259	1.38513	2.92986	1.20737	5.57203	0.223665	3.76033	1.05852	1.2007	2.45725	0.400919	3.83847	0.665121	4.40972	0.973877	3.57003	2.65822	0.021687	0.700836	1.37459	0.183727	0.201866	0.519051	4.11764	0.503432	1.56572	2.34586	0.584657	3.7549	0.462226	2.13877	4.2652
ENSG00000162695	1.97164	1.88121	2.59411	2.58836	2.77017	1.72349	2.2519	2.84611	2.03257	2.47585	2.50101	1.47255	2.1217	1.0496	2.1697	3.03084	2.84955	2.51022	2.57015	2.60047	2.72699	1.74159	2.21723	2.35192	2.79885	2.82505	1.86877	2.7773	2.90493	2.49131	2.46993	2.14193	2.49308	2.59936	1.71942	1.92831	2.90601	0.971577	2.39267	1.74064	2.34035	2.68929	2.07814	2.61929	1.87327	2.22397	2.50443	2.38584	2.72419
ENSG00000123643	1.58403	1.94312	2.46937	2.22576	2.39809	2.49559	2.8524	1.58851	1.8809	2.24346	2.49866	1.33146	2.51997	1.2636	2.26657	2.3189	2.24761	2.62289	1.92004	1.94894	2.01967	1.65999	2.15236	3.03112	2.47383	2.94414	2.59812	2.31854	1.87824	1.80414	2.28241	2.5257	3.08152	3.32623	1.65944	2.25892	2.50888	1.04919	2.46067	1.04746	2.66162	2.3696	3.30683	2.49648	1.65739	1.54614	2.5276	2.68072	2.31359
ENSG00000110107	6.20862	5.27886	6.12108	5.86272	6.21169	5.5163	6.11076	6.55714	5.5917	5.83346	4.90931	5.41322	6.08165	6.71604	6.11164	6.64347	5.79603	5.99779	5.65292	5.88285	5.15772	6.63039	5.47961	6.85532	5.88501	5.76089	6.04012	5.4129	6.02368	5.79115	6.61086	5.31854	6.25983	6.16036	5.53402	6.87638	5.66109	6.60264	5.62987	6.86777	6.79042	6.32719	5.6639	5.8977	5.29691	6.39342	6.27612	5.84749	6.36934
ENSG00000167377	0.102718	0.0322316	0.150983	0.086233	0.209915	0.193279	0.170856	0.178374	0.115042	0.0342341	0.206741	0.0394513	0.172964	0.00436358	0.115369	0.206292	0.100291	0.138808	0.247467	0.0907809	0.0858604	0.168705	0.0747723	0.0999142	0.099343	0.253095	0.0920927	0.0792739	0.126003	0.12767	0.196227	0.075639	0.0845533	0.234619	0.154193	0.0861329	0.108713	0.0500787	0.222227	0.054204	0.247551	0.100259	0.109254	0.308631	0.113377	0.221434	0.16666	0.0758166	0.132733
ENSG00000131781	0.0891622	0.316176	0.518248	0.887363	0.251761	0.367034	0.125971	0.33731	0.274849	0.146895	0.19861	0.0478848	0.670868	0.136931	0.184081	0.804686	0.121196	0.110232	0.160935	0.446116	0.466964	0.148905	0.13559	0.50193	0.35027	0.200275	0.142276	0.317419	0.832673	0.19917	0.159499	0.28686	0.194726	0.313155	0.26471	0.11848	0.150975	0.434885	0.236978	0.188808	1.25324	0.167443	0.786683	0.218993	0.436687	0.258226	0.246516	0.219353	0.319226
ENSG00000140832	1.35356	1.61328	1.70724	0.934956	2.40606	2.38139	0.99632	2.27365	2.01395	1.68771	2.23984	1.15202	1.63727	1.62067	2.17026	1.47423	1.30711	2.22933	2.11131	1.85951	1.9018	2.48534	2.1769	1.95525	1.24077	2.1646	1.30911	1.27197	2.26735	2.66529	2.09607	0.428189	2.13762	2.38228	2.0426	1.68508	1.97675	1.21945	1.33511	1.93103	2.65875	1.44365	1.88695	3.13149	1.14475	2.23468	1.41676	1.92657	1.84657
ENSG00000227471	1.86178	3.09188	0.499003	2.5058	2.852	2.54868	1.88846	1.85611	2.76708	1.3716	2.20799	2.03513	1.95144	1.08086	2.60346	2.32424	2.0158	3.35301	0.910327	2.68891	4.38508	4.38095	1.2033	2.28741	1.61212	2.85428	1.23898	2.39805	2.91377	0.473197	2.90034	3.42446	2.03556	3.33852	3.41826	2.91747	1.97765	3.16675	3.18503	1.7904	1.08254	1.94634	2.99643	0.868923	4.05694	3.29756	3.97517	2.78216	1.56819
ENSG00000186132	1.15148	1.65812	2.04126	2.61085	2.04537	1.95915	1.87761	2.68218	2.50433	0.825727	2.12202	1.6864	2.08516	1.25288	1.49831	2.00096	1.35325	1.92337	2.2692	1.94933	2.26266	2.83183	2.10029	2.00156	1.45089	1.18664	2.80178	1.6831	2.23725	2.03954	2.75528	1.84324	2.35078	2.89838	1.90436	2.4142	1.70444	1.37135	2.18807	1.87255	2.03677	1.57345	2.31874	1.73038	1.82163	2.01961	1.40995	0.978659	1.68042
ENSG00000176678	1.02084	0.219072	0.625708	1.61713	2.3658	1.54907	0.42622	0.171171	1.22061	0.378573	1.00954	1.70338	0.701093	0.474386	0.233909	2.17345	1.1455	0.0748691	0.546933	0.107406	0.421298	0.34546	1.88316	1.73843	0.87868	0.851838	1.17089	0.417688	0.101895	2.42512	0.345771	0.700605	1.09242	0.773779	0.717503	0.126019	0.311095	0.170003	0.742264	1.43474	1.46978	1.05271	0.571297	1.28154	0.0994576	0.040548	2.10975	1.55955	0.658673
ENSG00000180432	0.044391	0.00969142	0	0	0.00560663	0.0135112	0.00571221	0.0569464	0.00753783	0	0.0643175	0	0.0271539	0.0423957	0.0498074	0.0202621	0	0.124015	0.137346	0.00426436	0.0173149	0.0233031	0.00546463	0.00564741	0.0952245	0	0.0129449	0.0887063	0.104172	0.00624462	0.0233266	0.167385	0.0142182	0	0.0351707	0.00691838	0.0289612	0.00758134	0.134724	0.00695492	0.0191388	0.0201397	0.00531111	0.0448333	0.103014	0.0454764	0.0357879	0.0449116	0.006323
ENSG00000159374	0.0329874	0.0838825	0.454493	0.201149	0.0570671	0.0782206	0.033499	0.0761244	0.158752	0.0277805	0.0606663	0.129975	0.20751	0.890263	0.286352	0.0446125	0.0723532	0.00735448	0.0618576	0.336769	0.154713	1.88274	0.0320604	0.0814228	0.148245	0.143264	0.0658455	0.0760936	2.13224	1.01048	2.29779	0.0976691	0.0348291	0.663669	1.55394	0.099173	1.66048	0.0333685	0.0513368	0.0306338	3.05105	0.087368	0.975534	0.104015	0.029338	1.59204	0.0265741	1.33147	0.0461571
ENSG00000143369	4.54593	6.25059	4.52054	4.37513	4.15408	3.92386	5.95112	6.32096	5.27299	4.14672	5.91485	5.97231	4.15841	4.57465	5.30976	3.77343	4.37983	7.61167	5.02745	5.93976	6.59875	5.28692	5.43861	2.93957	4.87718	5.14728	4.19357	6.23468	7.81641	3.678	4.555	4.77696	5.98606	4.46153	7.00885	6.29777	6.80003	3.18572	6.14265	4.34536	3.78811	4.28723	3.77545	6.35993	7.12221	9.01235	3.4453	6.14505	3.27317
ENSG00000167553	6.64617	7.05059	5.74164	5.06433	6.6131	6.53032	6.42843	5.88416	5.37207	7.08278	5.83703	3.49983	6.08787	4.96812	6.89219	5.92065	6.25857	6.35461	6.34953	6.57458	6.88027	5.80529	6.22828	5.6306	6.44475	6.49332	5.7113	6.60852	6.11089	7.02979	5.99647	4.66552	6.52808	6.09056	6.4072	6.65001	6.18346	4.96136	7.13528	5.88278	6.16459	6.3482	5.61934	6.33338	6.49934	6.55196	6.68251	6.70657	6.35027
ENSG00000136021	2.91618	3.06887	3.97155	3.16026	3.28339	3.19866	2.94896	3.60647	2.96437	2.97874	3.03472	1.39398	3.32231	1.24196	3.41032	3.94339	3.23619	3.59105	3.01503	3.79645	3.4483	2.78568	3.18294	3.69543	2.99691	3.11059	3.27788	3.82309	3.93124	3.44698	3.4287	3.15999	3.91816	3.99224	3.34515	2.97482	3.79356	1.69304	3.44689	1.65882	4.24036	3.56167	3.6939	3.01872	3.33161	3.80377	3.28984	3.08533	3.89598
ENSG00000124596	1.3552	1.24615	2.18073	2.04814	1.95764	1.46887	2.50335	2.83594	1.8944	1.19667	1.43074	1.42146	1.93721	0.993858	1.21947	1.7815	2.05168	1.65675	1.51025	2.20146	1.84704	3.22892	2.47045	2.00435	1.65997	1.81666	2.10272	1.27686	1.85514	2.06578	2.4196	1.88984	1.87938	1.81839	1.47558	2.29598	1.35224	1.52049	1.53706	1.88539	2.33858	1.6992	1.70704	1.5966	1.2976	1.73441	1.96605	1.42409	2.27581
ENSG00000153283	0.593374	0.70592	0.835017	1.63721	0.334677	0.721643	0.290676	1.35457	1.34156	0.518788	0.762454	0.724318	1.10894	0.447775	0.537272	0.231946	1.41443	0.765385	0.996426	1.41935	1.71368	0.154394	1.48633	0.322973	2.57583	1.27099	0.252216	0.944791	0.889147	1.51546	3.25633	1.47364	1.17113	0.796208	0.204345	0.563583	0.938751	0.453692	0.664186	1.15887	1.56346	0.741366	1.24497	0.464157	0.634719	0.590705	0.762901	2.28683	0.294925
ENSG00000112799	0.698199	1.42377	0.932969	3.3169	1.19058	1.6927	0.859885	0.526787	2.60484	1.34195	1.62492	2.09977	1.61781	2.03494	1.02621	0.780688	2.07848	0.677267	1.16644	1.20816	2.81919	0.683036	1.75653	1.17	2.63518	2.503	1.15633	1.15483	1.12795	1.23381	2.90393	2.2957	2.11896	2.76257	0.258992	0.940567	1.96213	1.09641	0.735009	2.01659	1.11542	0.930611	1.51336	1.60143	0.863248	0.594885	0.67844	1.71071	0.627086
ENSG00000169684	0.628368	0.556732	1.47678	2.32356	0.79496	0.667406	1.30086	0.182179	0.54192	0.692246	0.320699	0.739083	0.469135	0.554965	0.768311	0.900609	0.749649	0.745975	0.456097	0.110802	0.684197	1.92767	0.626917	1.00692	0.545972	0.758377	0.934677	0.516548	1.07135	1.07449	0.532296	0.705097	0.720258	1.07787	0.675757	0.689566	0.439634	0.231896	0.292743	0.671156	1.82486	0.530646	1.93567	0.602602	0.458639	0.859593	0.93804	0.650543	1.1344
ENSG00000107929	2.85855	2.5204	2.7015	3.09305	2.39647	2.97586	1.9082	3.47713	2.89134	2.03689	2.36331	1.85176	2.79101	2.69114	2.88897	2.71113	2.70373	3.47006	2.09296	3.33859	2.24409	3.0834	2.77928	2.98364	2.33635	2.44333	2.57901	3.63588	3.4871	2.93093	3.28856	2.66051	2.78983	3.07178	2.68392	2.0502	3.36869	1.97431	3.00183	2.35509	3.26927	3.26857	2.84548	2.83185	2.93304	3.2196	3.24574	2.96857	2.94519
ENSG00000242950	0.00407671	0.0035181	0.0573283	0.00502147	0.0081166	0.0531	0.00414058	0.0488941	0	0.00342778	0.00432536	0.0188936	0.0536025	0	0.0242707	0.00982173	0.00724425	0.0356406	0.00771217	0.0153875	0.00838871	0.025306	0.00791121	0.0122461	0.00508495	0.0225042	0.0140618	0.00762771	0	0.00452673	0.0281188	0.0131278	0.0137365	0.0255479	0.0318866	0	0.0245163	0	0.00850038	0	0.0184914	0.00586523	0.0229455	0	0	0.26664	0	0.00330111	0.00915266
ENSG00000169682	0.82998	0.567079	1.36114	0.830115	0.775169	1.12737	0.685858	0.746123	0.922746	0.988727	0.561382	0.187151	1.23376	0.295162	1.15382	0.424741	0.665315	1.30554	0.714743	0.820625	0.421559	0.571726	0.666004	0.936661	1.03579	0.878656	0.96348	0.723593	0.377607	0.400598	1.15994	0.551371	0.935433	0.548051	0.832158	0.612768	0.80901	0.069516	0.68402	0.493118	0.705591	1.14946	0.654874	1.3972	0.567712	1.0423	0.872616	0.674651	0.964707
ENSG00000180549	0.129589	0.340771	0.253785	0.88905	0.239625	0.206176	0.0859209	0.186997	1.07546	0.0945306	0.469516	0.989187	0.753381	0.396236	0.25644	0.418204	0.527926	0.327851	0.893977	0.389942	0.421087	0.0785715	0.483217	0.462038	1.37377	0.63236	0.128217	0.279517	0.312939	0.540789	1.59313	0.982462	0.422699	0.362993	0.045177	0.473311	0.224582	1.06742	0.448361	1.30453	0.654242	0.231376	0.139363	0.358495	0.36313	0.185987	0.602171	1.8273	0.0429188
ENSG00000172331	3.87016	4.33789	4.10292	3.77196	5.1432	2.84231	5.55138	3.54974	5.96452	3.6363	4.9805	3.07305	3.77733	1.49861	5.00952	5.62263	5.08425	4.85955	5.43015	5.17433	6.55006	4.16908	3.49426	3.67184	5.98098	6.10451	4.29355	5.55389	4.89414	3.05821	3.18841	4.03796	4.48543	4.04877	5.19802	4.86791	4.0961	2.22277	5.12069	3.80908	2.83343	3.6178	2.67067	5.39567	3.85519	5.0052	5.01842	4.4846	5.55708
ENSG00000102195	0.0254287	0	0.435234	0.0312683	0.719858	1.89117	0.0129698	0.070374	0.177811	0.219624	1.5105	0	0.839388	0.154635	0.0254093	0	0.0668811	0	0	0	0	0	0.0490083	1.12922	3.17681	0	2.98065	0.0395035	0.0705672	0	0.0352518	0	2.22256	0.448773	2.51212	1.52708	1.31307	0	2.01946	0	2.92916	0.31405	5.28746	0.472987	0.549239	0	0	2.10798	0.111013
ENSG00000169402	0.0149616	0	0.00421821	0	0.00498886	0.00602556	0.0101478	0	0.0266459	0.00420805	0.0158705	0	0.0121415	0.00636525	0.00500061	0	0.0265091	0.0393382	0	0	0	0.0310133	0.00486248	0	0	0.00694601	0	0	0.0168601	0	0.0207703	0.00404285	0.0168498	0	0	0.00615638	0	0.00674649	0.0104312	0.0306824	0.0170387	0.0143622	0.0465759	0	0	0	0.00803656	0	0.0279153
ENSG00000188092	0.325342	0.291694	0.506539	0.449653	0.688796	0.257008	0.31409	1.29505	0.483431	0.158656	0.433736	1.38865	0.35028	0.493379	0.245328	0.515507	0.246105	0.44121	0.545949	0.51286	0.426597	0.837876	0.210757	0.516139	0.290481	0.287085	0.399549	0.252973	0.251163	0.451099	0.582388	0.294051	0.421411	0.517248	0.352787	0.470957	0.218374	0.447814	0.423964	0.663749	0.816463	0.313568	1.16482	0.37224	0.300629	0.673135	0.3275	0.225626	0.386502
ENSG00000124785	0.351283	0.755228	4.8128	2.80067	1.96507	0.578804	0.15513	1.4048	1.13697	0.225423	1.29559	0.313798	4.60751	0.860315	1.04072	1.11416	2.92117	1.01495	0.788147	0.803563	1.36827	0.669213	2.17812	4.17943	2.24413	1.65179	3.60901	3.38736	2.27746	0.876391	1.36484	3.03508	1.73014	3.00385	0.234549	0.793772	2.63739	0.276285	0.974343	0.758211	4.56362	0.834354	3.26162	1.29699	0.553563	1.19087	1.33414	3.09219	0.50483
ENSG00000178093	0.512876	0.182379	2.37193	0.92451	0.888399	0.965773	0.680591	1.13755	1.22685	0.758269	0.388845	0.705354	1.77866	0.843959	0.368838	0.640855	0.493125	0.733457	0.57826	0.767477	0.619578	1.33299	0.448035	0.69319	0.287895	0.832613	0.762773	0.398993	0.234029	0.836971	1.14836	0.427339	1.12964	0.578249	0.259846	0.736663	0.405244	0.825761	0.60582	0.549658	1.79417	0.535731	0.805034	0.540376	0.360215	1.28088	1.09639	0.372962	1.17921
ENSG00000141469	0.0577049	0.0201772	0.0897568	0.17726	0.038606	0.0234459	0.0158587	0.192527	0.106513	0.0131378	0.0491305	0.0271687	0.105804	0	0.0576614	0.124731	0.0207962	0.0511218	0.0689531	0.058298	0.0671647	0.0403379	0.0301894	0.0156794	0.112995	0.115206	0.0313559	0.0243036	0.0263142	0.0301942	0.41061	0.192587	0.123903	0.0367007	0.0123461	0.0614664	0.0168807	0	0.102804	0.0288453	0.365523	0.0196421	0.0616668	0.0980849	0.0138783	0	0.0797787	0.115953	0.0391867
ENSG00000186350	3.6967	3.40007	4.88926	3.19204	5.00638	4.76566	4.18727	4.24002	4.02795	4.80344	3.68691	4.12859	4.70465	3.06677	4.47618	3.18845	3.97204	4.47915	4.21201	5.34838	3.49429	3.67803	4.08212	3.73382	4.39059	4.22708	4.19788	3.89005	3.38107	4.42259	4.12511	4.03664	4.15606	3.94784	4.37185	4.21929	2.80531	4.22259	3.9658	4.13935	3.48505	4.59099	3.75361	4.09083	4.3862	4.33916	5.08972	4.99801	3.64878
ENSG00000187134	2.32018	2.07921	6.29575	8.28417	1.59366	3.47879	1.35593	2.2197	3.0179	0.964051	1.55366	5.67794	7.4523	3.50299	1.91549	0.320612	1.53096	3.71328	2.7918	2.43387	1.39215	2.5755	0.575607	6.16969	1.02254	1.11769	7.12796	1.99351	2.524	1.01942	1.84265	2.18905	4.4003	7.23108	2.4216	0.863312	2.66752	3.54887	1.96618	1.4189	3.16996	1.07013	6.24278	2.62	0.959152	3.04203	2.15693	2.34406	7.39475
ENSG00000099953	3.88137	3.8986	5.65335	6.30519	2.58366	4.03806	3.16268	0.608285	7.04523	1.04016	7.42102	4.12233	5.1894	5.91723	3.46417	5.10503	1.12855	0.985852	5.19311	1.17293	6.28008	1.24864	2.96203	3.74569	2.80748	5.94625	6.20003	2.37854	1.64158	4.58345	2.07291	2.75226	4.06722	6.02965	2.29471	3.31349	6.29481	2.79871	2.35478	6.80295	3.02067	3.98224	3.55687	2.64725	1.02287	0.657188	3.3043	1.05454	4.73216
ENSG00000257103	4.42646	4.20362	5.39804	4.56305	4.71345	4.38959	3.87227	5.39759	4.46363	4.6805	4.83644	3.18604	4.5575	3.5418	4.20697	4.73387	4.3895	4.74493	4.54076	4.68822	4.49057	4.5039	5.26671	4.91621	4.32489	4.65675	5.11546	4.5883	5.09579	4.93519	5.14653	4.57402	4.84677	4.77699	4.49674	4.79102	5.20887	3.23833	4.34629	3.94914	5.44798	5.51977	5.11801	4.47425	4.43065	4.21472	4.30399	4.27548	4.93337
ENSG00000185634	0.0164166	0.0863937	0.507824	0.420531	1.46005	0.0343877	0.0372462	0.0456828	1.42051	0.0410478	0.200069	0.0379524	0.134114	0	0.107271	0.0799476	2.48699	0.112263	0.263648	0.0791223	0.183465	0.280592	0.0199134	0.348146	0.206023	0.126173	0.31912	0.0679654	0.103266	0.101756	0.110492	0.441621	0.240451	0.401226	0.0129806	0.220932	0.165167	0	0.0796474	0.0891095	0.185162	0.154798	0.620677	0.272715	0.0145912	0.887764	0.192294	0.567298	0.0899677
ENSG00000163531	0.640264	0.921125	1.61847	0.537207	0.96192	0.722677	1.14629	0.789317	1.13018	0.784545	0.592576	1.44509	0.816912	0.343434	0.644387	1.34341	1.06815	0.36307	0.977103	0.651743	0.761213	0.738161	0.918217	0.646185	0.730631	0.57244	0.496887	1.1039	0.233447	0.439276	1.17217	0.748164	1.56236	0.361174	1.04541	0.848702	0.910629	0.539247	0.719219	0.255456	0.941174	1.08406	1.14234	0.818132	0.62644	0.364571	1.15599	0.773169	0.098437
ENSG00000169188	3.80905	3.72943	4.06279	3.30528	3.87099	4.15731	4.04544	4.17242	4.04501	3.56325	3.67528	3.50737	3.748	3.43779	4.44341	3.46462	4.38762	3.94499	3.74127	3.98621	3.75818	4.57208	4.20154	3.62425	3.75127	3.90142	3.99325	3.73452	4.06305	4.13448	4.53212	3.55557	5.0846	3.51461	4.14163	4.80662	4.1947	2.9767	3.82617	5.08049	4.52806	3.62879	3.70133	3.91727	4.01796	4.20072	4.29566	3.9838	2.94421
ENSG00000131059	0	0	0	0	0	0	0	0	0.013465	0	0	0.0462399	0	0	0	0	0	0.035229	0	0	0.0103562	0	0	0	0	0	0	0.00628505	0	0.0111588	0.0139635	0	0	0	0.015845	0	0.00870111	0	0	0	0	0	0.046853	0	0	0	0	0	0.0112987
ENSG00000119777	3.95508	3.68931	4.34129	4.65052	4.64353	4.60551	4.37004	5.10058	4.62145	3.65027	4.24801	3.09243	4.84093	3.25357	5.03964	4.7698	4.14505	4.34194	3.80101	4.26975	4.23747	4.45039	5.09661	5.8348	4.85889	4.43222	4.72681	4.25525	5.0516	4.15478	4.80987	4.60921	4.68756	4.4613	4.71427	4.36943	4.65132	2.60748	4.10663	3.91651	4.36906	4.52877	4.5244	4.88921	3.87843	4.30308	4.48395	4.34801	4.69431
ENSG00000235173	3.53177	3.56811	3.77122	3.73795	3.96354	3.1417	3.12948	3.10365	4.19925	3.54788	2.95423	3.5176	4.05114	4.46911	3.84462	4.29915	4.32538	4.5016	4.01501	2.62455	3.20065	5.75051	4.45458	4.42258	3.45729	4.40695	3.51609	4.03741	3.85997	3.68064	3.73946	3.2827	4.50231	3.83113	3.65493	3.55828	2.96746	3.95202	3.3226	5.04841	4.12946	3.74291	3.79019	3.88348	3.1286	3.86617	3.86946	3.5703	3.1178
ENSG00000233087	0.0323478	0.0553739	0.525538	0.323602	0.0946588	0.408968	0.0963866	0.0303332	0	0.0272409	0	0	0.114666	0	0.346976	0.185037	0.0570516	0.111257	0.0606699	0.0245816	0.0658875	0	0.0923321	0.0953264	0.154676	0.0447346	0.242609	0.0986852	0.036425	0	0	0.0771553	0.252962	0.808679	0.322745	0.0783518	0.0280301	0.0434659	0	0.0787556	0.55105	0.0689663	0.201476	0.102046	0.1472	0.06554	0.101521	0.0773365	0.140118
ENSG00000130714	2.22906	1.62505	2.74269	2.10701	2.02492	2.1618	1.46306	1.20294	2.43043	2.093	2.11776	2.88098	2.30026	3.43803	1.90407	1.82935	0.801233	1.99351	2.46874	2.51367	1.93222	2.27799	1.73941	2.18632	2.55503	2.2232	1.29751	1.6296	2.1113	2.3637	2.40256	1.91398	2.42858	2.69168	1.23561	1.14662	1.31999	3.45393	1.78951	1.58257	2.15403	1.70201	2.00367	2.19136	0.463882	2.21207	2.16478	1.99319	1.90155
ENSG00000187612	0	0	0	0	0	0	0	0	0	0	0	0.0611606	0	0	0	0	0	0	0	0	0	0	0	0	0	0	0	0	0	0	0	0	0	0	0.0417566	0	0	0	0	0	0	0	0.0251073	0	0	0	0	0	0
ENSG00000055813	0.031086	0.0108044	1.37674	0.759076	0.0432021	0.0665675	0.0063692	0.65213	0.0333269	0	0.0198683	0	0.192866	0.0237948	0.108827	0.0337381	0.0221886	0.0275107	0.16304	0.123187	0.0320206	0.0387747	0	0.423516	0.183819	0.101118	0.124947	0.031059	0.0419065	0	0.0766099	0.288812	0.165433	0.0866253	0	0.00771373	0.114927	0	0.0195534	0	0.482503	0.0357435	0.383368	0.198934	0.0221582	0.0255358	0.0100679	0.0450771	1.36041
ENSG00000168743	3.76456	3.74968	4.14828	3.96526	2.409	3.75537	2.72544	5.52294	1.82397	1.70165	2.46375	2.20983	2.15109	2.04818	3.03864	5.16423	2.33653	2.93683	4.15176	4.29489	3.7726	3.70692	3.74072	2.80142	1.34436	2.05342	4.26605	3.28349	2.98723	4.14265	3.47433	2.45464	4.06356	4.4613	3.37065	4.7877	3.61726	2.41934	1.65384	2.13508	3.29566	2.68976	3.18244	2.65072	2.52244	4.3576	0.842549	2.82865	4.0058
ENSG00000157600	3.63309	2.62686	3.92048	3.47763	2.98293	3.02747	3.34462	4.23042	2.88822	3.24513	2.34305	2.30996	3.46668	0.992168	3.54069	4.10087	2.86606	2.96321	2.47299	3.23134	2.56025	2.88517	2.45627	3.70096	2.98867	3.00219	3.0215	2.99102	3.05374	2.65728	3.24962	2.64528	3.19223	3.63617	2.78958	3.03548	3.26676	1.80831	2.44962	2.81307	3.33359	3.56394	2.92806	3.58141	2.54062	3.01736	2.96716	3.43462	2.53982
ENSG00000027644	0.0291398	0.021011	0.0881987	0.0299124	0.0480963	0.108119	0.0247022	0.00458994	0.161666	0.0123197	0.105376	0.0886374	0.0059538	0.00622953	0.067049	0.0117949	0.0259477	0.0511199	0.0591724	0.0547205	0.0300164	0.0403364	0.0468956	0	0.0774622	0.0795345	0.0168819	0.0212871	0.0328172	0.0323257	0.0731816	0.0582387	0.00414065	0.0306472	0.00772836	0.00602511	0.0904874	0	0.0102091	0.035966	0.0548554	0.0554236	0.161959	0.0235932	0.0115741	0	0.0312072	0.0507279	0.0164567
ENSG00000164938	2.40764	1.91809	4.10377	2.78988	2.96796	2.66975	1.88409	3.68982	3.77845	1.62937	2.53184	1.39901	2.95886	1.63047	3.3678	2.23995	2.38972	2.64414	3.02612	3.36835	2.92546	2.12339	1.80127	2.22823	3.79228	2.44245	2.92344	2.80813	3.41315	2.379	3.477	2.46763	3.58913	3.30319	1.49066	2.33001	2.782	1.31987	3.0627	2.15078	4.08957	2.69984	2.15328	2.21726	3.83698	2.43057	2.23549	2.58614	1.31104
ENSG00000060566	0.00931474	0.0397612	0.0234324	0.0564523	0.00928576	0.0112119	0	0.0431325	0.0492803	0	0.0677919	0.0638638	0.0666225	0.0352407	0.0368755	0.0112356	0.0328706	0.185748	0.0435864	0.0555731	0.0380106	0	0.0180453	0.0186462	0.0683173	0.159569	0.0214038	0.0459439	0	0	0.182889	0.059145	0.0235026	0	0.0146853	0	0.0477146	0	0.0385113	0	0.0522905	0.0657439	0.301488	0.0150246	0.0110251	0	0.0149449	0.0592847	0.0414337
ENSG00000101144	1.89832	2.4952	4.11926	3.49876	2.80016	4.72295	0.318625	4.4512	3.54264	2.37137	1.0568	3.1473	5.17328	2.34316	3.16239	0.692762	1.85596	4.52477	4.34361	3.37917	3.21725	4.46393	4.12354	4.2106	2.36139	0.763955	4.44432	2.81593	5.21022	3.311	4.16559	0.900079	5.02169	4.81907	2.45962	3.61275	2.90237	2.78466	1.46907	0.725582	5.29663	1.23011	4.16474	3.2731	2.10649	4.29453	2.31273	2.1385	5.14719
ENSG00000165076	0	0.0194706	0.00954083	0.120773	0	0	0.0114921	0.0927567	0.0449965	0	0.0239081	0.0262195	0.0273676	0	0	0	0	0.019943	0	0.0340322	0	0	0	0.0226352	0	0.015692	0.0387929	0	0	0.0125609	0	0.0362369	0.00956954	0	0	0	0	0	0	0	0.0256628	0.00815373	0.0422797	0	0	0.0682133	0.0181471	0	0.0127182
ENSG00000183305	0	0	0.0344139	0	0	0	0	0.00964997	0	0	0	0.0238682	0	0	0.0102879	0.125346	0	0.018151	0	0	0	0	0	0	0	0	0	0	0.112049	0	0	0	0	0	0	0	0.0177701	0	0	0	0	0	0	0	0.0599238	0	0	0	0
ENSG00000198590	0.124786	0.0278445	0.112219	0.0199366	0.0943009	0.0577025	0.103743	0.251549	0.268399	0.0405142	0.430295	0.321802	0.0487017	0.100109	0.0242159	0.0388046	0.0428333	0.0974403	0.15355	0.0663623	0.0815886	0.205407	0.0157435	0.0795661	0.010129	0.0445625	0.0910541	0.0450715	0.0182563	0.104673	0.119558	0.0389427	0.0868425	0.0993652	0.123254	0.0395548	0.0279217	0.116078	0.114425	0.197494	0.0724236	0.0574775	0.13221	0.0517258	0.155343	0.0652896	0.0387622	0.00657968	0.0539438
ENSG00000072818	0.832458	0.698831	1.21516	2.08018	0.583672	1.39667	0.522903	1.13051	2.46972	0.587872	1.52111	1.90877	1.70606	2.12176	0.999763	0.577567	1.25882	0.873911	1.64702	1.24666	1.62338	0.839415	1.34857	0.883604	2.41208	1.49304	0.86382	0.88828	0.782058	1.49556	3.36722	1.4946	1.95183	1.27308	0.731948	1.22683	0.877578	1.45277	1.11546	2.34496	1.65281	0.796553	1.17509	1.06734	1.03311	0.922906	1.09665	1.84722	0.660758
ENSG00000271303	0.54249	1.21428	2.44573	2.11871	0.981277	1.16288	0.666957	0.794949	0.975078	0.968375	0.401235	0.256623	3.69714	0.278245	1.54005	1.14698	1.01288	1.57966	0.875154	1.23248	1.27759	0.554894	0.29264	3.43815	1.11853	1.63572	3.43877	1.16128	0.692651	0.771361	1.08266	1.42904	2.18366	3.26694	1.23306	1.21989	1.42521	0.119989	0.502046	0.336276	1.28893	0.683699	1.98201	1.32579	0.90153	1.03861	2.57057	1.45607	3.98184
ENSG00000069849	7.46789	7.24665	7.5374	7.21179	8.503	9.04899	6.3992	7.35744	7.70213	7.37622	6.16024	5.89506	7.75921	5.34744	8.00411	7.55349	7.33721	8.26304	8.14078	8.6647	7.89091	6.47622	6.39471	6.89659	6.64201	6.42117	8.45366	7.40017	7.05556	8.0107	7.48602	6.06396	8.46594	7.91205	7.56972	8.80908	7.44702	7.83236	7.03084	7.19091	9.09708	8.53402	6.46428	7.12417	7.20357	7.61714	7.74876	6.66886	7.59359
ENSG00000197454	0	0	0	0	0.0263265	0	0.0531478	0	0	0	0	0	0	0	0	0	0	0	0.0250225	0	0.0272034	0	0	0	0	0	0	0.0165472	0	0	0	0	0	0.0414654	0	0.0324318	0	0	0.0546094	0	0	0	0	0	0.0312234	0	0	0	0
ENSG00000163218	4.47063	5.23643	1.40436	0.729888	3.28242	3.40356	2.73067	2.65567	2.86736	2.01284	2.92185	2.53641	1.86268	1.06891	4.01152	0.423277	2.35483	5.21402	3.17873	1.63245	5.2045	2.54548	1.67948	1.50197	3.64697	2.03808	1.41882	4.89752	1.51148	0.695073	1.35083	0.339284	1.43488	1.86838	4.88835	1.61246	1.92382	2.16382	3.20213	0.520554	2.38165	2.46255	0.44409	1.4541	3.99273	3.40715	3.86295	4.01721	0.218009
ENSG00000173933	2.31863	1.52893	2.10678	1.69167	2.03327	1.60176	1.87986	2.09744	1.68002	1.82617	2.41412	0.787479	1.69215	1.0918	1.93796	2.52038	1.40652	1.69538	2.44317	1.96917	2.0184	1.9723	2.57682	1.52866	1.77674	2.02153	1.8575	1.59326	2.0369	1.66158	1.82278	1.71241	2.07057	1.96621	1.99152	2.41618	1.64195	1.22816	1.76572	1.49728	2.58636	1.72797	2.63795	1.86135	1.88491	2.84809	2.15407	1.81934	2.02686
ENSG00000130749	2.64455	2.34908	3.9359	2.72993	3.01809	3.57596	2.72859	3.67636	2.95784	3.08204	2.2274	1.64394	3.67033	1.92372	2.99333	3.02086	3.23562	3.34767	2.84098	3.61325	2.06179	3.45049	2.9695	3.12443	3.20355	3.42959	2.83545	3.07098	3.22933	3.4402	4.05711	2.95982	3.4497	2.97911	2.94961	2.92026	3.32459	1.2887	3.21483	2.72201	3.96208	3.44082	3.21299	2.9658	2.58003	3.00481	3.01908	3.48602	2.83191
ENSG00000175984	2.66605	2.39285	2.31075	1.31818	2.27002	1.73833	1.77779	3.23002	1.58604	2.04188	2.11919	1.48471	2.2307	1.42672	1.67818	2.00187	1.88977	3.2297	1.71193	3.28198	2.83225	2.01042	2.7209	2.0279	1.28309	1.48066	1.08618	3.32755	3.28069	1.92654	2.5217	1.75344	2.50323	1.61747	3.11592	2.48145	1.75657	1.64061	3.05195	1.06847	1.77461	3.20707	2.2104	2.82863	3.55968	3.66817	2.48461	2.60014	2.40448
ENSG00000114978	4.3652	4.70658	5.00929	5.11574	4.73365	4.35788	4.71868	5.50221	4.77057	4.60137	4.27161	1.8343	4.98843	2.58599	5.00208	5.31561	5.24396	4.6573	4.03385	5.13535	5.21053	4.12243	5.55785	5.02903	4.93906	4.74287	4.82753	5.09261	5.27843	4.77382	5.27443	4.37089	5.02838	5.28981	4.56486	4.34829	5.29704	2.902	4.74773	3.51439	5.41685	5.13404	5.10334	4.54775	4.49599	4.74263	5.55507	4.83435	5.055
ENSG00000006071	0.00368746	0	0.00310791	0.00907005	0	0.00886691	0.014923	0	0	0	0.0117055	0.091626	0	0.0140267	0.0110258	0.00444965	0	0.0481398	0.0104523	0.00279547	0.0226478	0.0229058	0	0.0509928	0.00918456	0.0254152	0.0211437	0.00460381	0	0.00817756	0.0203991	0.0295134	0.0186034	0	0	0	0.00319102	0.00992664	0.00385006	0.0226607	0.0414761	0.0237227	0.100971	0.0118855	0	0	0	0	0.0124025
ENSG00000110811	1.39228	1.80528	2.8419	3.85608	1.51242	2.6044	1.67372	1.41167	3.67767	1.31406	4.03542	2.13121	2.0673	4.34788	2.69629	2.42271	0.452992	2.4512	2.99906	0.810909	2.91567	2.92027	2.05699	3.90687	2.61974	2.94631	3.79129	1.1364	3.2922	1.17383	1.04954	2.86357	3.02804	3.94775	0.705958	1.37892	4.06065	1.63243	1.11714	4.74835	2.58837	2.65473	2.409	2.39484	0.668472	1.74381	1.41834	0.850148	3.79714
ENSG00000196867	0.0666178	0.133001	0.208018	0.438833	0.0766272	0.514409	0.0676389	0.110023	0.283127	0.0386914	0.571064	0.0733278	0.222015	0.0493749	0.222212	1.08497	0.104633	0.471899	0.163677	0.510084	0.290392	0.15583	0.100976	0.0426041	0.469718	0.250966	0.18618	0.144852	0.592315	0.750424	0.569873	1.08328	0.309944	0.774508	0.0446455	0.0940241	0.615002	0.00483236	0.0872332	0.352706	0.57295	1.06497	0.0694555	0.244787	0.0825872	0.113128	0.0894659	0.141028	0.134742
ENSG00000157999	0.0962608	0.0834286	0.480651	0.0949303	0.303185	0.395949	0.0977211	0.240056	0.103035	0.0166398	0.370561	0.0456424	0.555706	0	0.132938	0.191034	0.10252	0.18164	0.226389	0.298759	0.438807	0.193868	0.181519	0.368487	0.164183	0.276	0.21315	0.186345	0.373692	0.280432	0.181896	0.0782308	0.174152	0.177206	0.335213	0.0948204	0.193178	0.0266086	0.265111	0	0.542095	0.308474	0.288672	0.554213	0.156273	0.079389	0.289059	0.0935984	0.319958
ENSG00000198034	7.72615	8.53833	7.97771	8.39603	8.13472	8.08829	8.54761	7.85142	8.21953	7.73471	8.03708	8.43959	8.36498	8.51902	7.61107	7.96154	8.34186	7.07225	7.69478	6.64922	7.86139	10.3765	7.88499	7.82089	7.65548	8.51732	9.03859	8.01993	8.0258	7.81573	8.53343	7.71507	8.97053	7.89776	7.43739	9.09336	8.32165	9.0604	8.94906	9.68839	8.38254	7.84388	8.6722	7.53567	8.93147	8.49902	7.58967	8.3022	8.09735
ENSG00000170043	5.1819	5.99475	5.60832	5.66342	5.45804	6.13616	6.59261	6.16773	5.87611	5.73305	6.40508	7.04034	5.58005	6.49474	6.23809	6.50152	6.1949	4.99786	6.00108	5.33566	6.26645	6.27007	6.73271	5.81822	6.07372	6.12771	6.22856	5.75449	5.16235	6.09454	6.37346	5.80226	6.26064	5.5457	5.95306	6.34915	5.11401	6.63301	6.02177	6.78123	5.96426	6.12529	5.621	5.6302	4.91194	5.57125	5.61565	5.97117	5.77449
ENSG00000144152	0.182042	0.376355	0.492263	0.756027	0.675128	0.709506	0.623903	0.174401	0.86434	0.411751	1.79757	0.359005	0.538205	0.308306	0.770772	2.27697	0.153918	0.397249	0.586876	0.603706	1.08925	0.171753	0.903898	0.141787	2.05729	0.954286	0.267652	0.612201	0.46221	0.409257	0.679506	0.744239	0.54952	0.681261	0.685377	0.116868	1.26769	0.287522	0.175573	0.627457	1.12505	0.641504	0.399136	0.753754	0.281543	0.162096	0.501255	0.664413	0.755297
ENSG00000095203	3.16578	2.5651	1.88943	1.74498	1.52211	1.45534	1.6196	3.37525	2.08376	1.84811	2.20087	1.76549	2.37425	0.912648	2.19788	0.826432	1.37954	2.09726	2.56223	3.60989	1.95812	0.809513	1.2942	1.40073	1.65327	1.4314	2.64805	1.89611	1.88795	1.71852	1.12978	0.314502	2.67683	2.26668	3.1087	2.72019	1.01099	1.26942	2.40441	1.08186	1.42146	1.76253	2.53502	1.74654	1.92613	2.55313	1.34257	1.97061	1.54289
ENSG00000100354	1.37438	1.03721	2.24716	1.74334	1.43342	1.92955	1.62585	2.25443	1.99588	1.28695	1.19443	0.556548	2.50382	0.732201	1.85985	1.75043	1.24691	1.33757	1.73364	2.12863	0.857934	1.25835	1.19233	1.67539	1.91939	1.63165	2.18927	1.59006	1.94422	1.31181	2.11324	1.70386	2.19486	2.43197	1.26317	1.40269	1.91144	0.390927	0.865825	0.894985	2.56246	1.46275	1.84127	1.69547	1.3401	1.89813	1.14428	1.8579	1.97674
ENSG00000259040	0.0881954	0.0323307	0.0315841	0.383192	0.1908	0.0885138	0.00767736	0.0625419	0.683392	0.0126862	0.42825	0.118562	0.0719102	0.357008	0.0225422	0.0181807	0.0134198	0.019958	0.0700495	0.0396565	0.00778824	0.0769031	0.0291576	0.00759032	0.109237	0.0718646	0.248403	0.0465669	0.0586169	0.0167363	0.130929	0.145432	0.26813	0.103836	0.0119216	0.0277136	0.0578418	0.108289	0.0390349	0.0908444	0.316685	0.0429956	0.168654	0.0242923	0.017841	0.0458661	0.0241638	0.0122188	0.00849766
ENSG00000189120	3.88799	2.80763	0.600777	0.763483	1.55129	2.23479	2.80044	1.28451	1.56471	1.02443	2.63934	3.66671	1.75755	0.892089	1.89782	1.46321	1.92382	1.72855	1.16977	1.15648	2.48232	0.640626	2.27566	0.26924	2.12854	1.95798	1.11696	2.62467	1.84289	2.82941	1.02171	2.17858	1.31795	1.72448	2.47473	1.58049	2.57825	1.20738	2.41752	1.07086	0.812948	1.28513	0.808699	1.63789	1.88838	1.42903	1.78653	2.77493	0.958299
ENSG00000158623	3.0785	3.34319	3.73493	3.29267	3.43815	3.19573	3.65628	3.43589	3.32661	2.51979	2.86464	1.08582	3.86514	1.64519	3.52497	4.62419	1.58761	3.11939	2.9721	3.75979	3.26854	3.08371	3.36345	3.07009	3.58337	3.35171	3.91693	3.66923	4.2372	1.57889	3.64815	3.3345	3.0396	3.63893	3.36374	3.64107	2.30073	2.75475	3.15997	2.51691	3.97763	3.65456	2.90723	3.33096	3.60911	3.84806	3.98386	3.59097	3.89067
ENSG00000145839	0	0.0360802	0	0	0	0	0	0	0	0	0	0	0.0505966	0	0	0	0	0	0.0395561	0	0	0	0	0	0	0	0	0	0	0	0	0	0	0	0	0	0	0	0.0858241	0	0	0	0	0	0	0	0	0	0
ENSG00000114812	0.779472	1.663	1.30383	1.23905	0.775619	1.14102	0.168738	1.00749	0.909983	0.125441	1.00148	0.226045	1.06637	0.277683	1.34743	1.41307	0.731436	0.681888	1.22749	0.740884	0.837293	1.87721	1.01616	0.396265	0.665613	1.04977	1.5877	1.99095	1.1479	0.654401	0.827393	0.213331	1.59611	0.915494	0.68907	1.5741	1.30187	0.0756977	1.35894	0.626201	2.50177	1.07211	0.630306	0.395205	0.30949	0.969529	0.780339	0.408276	0.729264
ENSG00000139618	0.365501	0.743618	2.09842	1.39985	0.833479	1.09226	1.54351	1.91483	0.626696	1.30018	0.180752	0.480313	1.27688	0.420216	0.81658	1.26442	0.916517	1.27302	0.481525	2.5083	0.258949	1.588	1.07506	0.886514	0.801121	0.884459	1.02999	1.09245	0.782736	1.70291	2.08877	0.368559	0.923828	1.18655	0.485023	0.706116	0.507816	0.0802427	0.82284	0.25592	1.78389	1.01828	1.54421	1.16961	0.48549	0.76644	1.55489	1.22499	0.881568
ENSG00000169313	0.0266755	0.100921	0.22048	1.33864	0.810201	0.168165	0.0136087	0.0737691	0.392712	0.410826	0.24868	0.0310195	0.385571	0	0.0785323	0.0943393	1.04429	0.0921813	0.0745372	0.260636	0.657074	0.0818175	0.251427	0.165824	0.812938	0.639025	0.0903039	0.174009	0.171546	0.195446	0.980752	0.202526	0.161307	0.234795	0.0419115	0.0327595	0.0793119	0	0.0139882	0.032931	0.43395	0.0569985	0.0621958	0.144784	0.0158557	0	0.310347	0.454317	0.0447147
ENSG00000165389	6.52716	4.43107	5.75951	4.76344	4.63585	5.096	4.80025	4.48805	4.56546	4.33836	5.45516	3.61088	5.56489	4.16565	5.42711	3.66263	4.27975	5.52383	5.04512	4.90303	4.60705	4.081	4.14681	5.29088	3.65864	3.60062	6.23394	5.55111	4.03232	4.74149	4.11566	3.5003	4.41277	4.80763	5.35262	3.96545	4.00077	4.22194	5.86667	3.78312	5.08092	4.99357	5.57006	4.07121	5.06284	4.34574	3.59166	3.8043	4.68395
ENSG00000134698	1.25799	0.902361	2.77553	1.75802	1.90444	2.35208	1.61733	2.73144	1.95054	1.57944	1.79683	0.525294	2.15896	1.01912	1.47722	1.99088	1.37664	2.01446	1.97613	2.26109	1.74368	1.86081	1.18032	2.6514	1.46167	1.6772	1.9553	1.93925	2.06868	1.97815	2.5795	2.43836	2.48697	2.36725	1.50009	0.804185	2.07858	0.897571	1.87945	1.4492	3.33545	1.85676	1.89286	1.59159	1.92121	2.01375	1.90297	1.74987	1.95214
ENSG00000166788	2.15822	2.1464	2.87056	2.61939	2.21547	2.30066	3.73071	1.48006	1.77607	1.71366	1.85121	2.47	1.74118	3.01347	2.45642	2.1695	3.01548	2.43826	1.89884	1.92295	2.06109	2.09566	2.76377	2.12957	2.16213	2.596	2.08405	1.99967	1.97953	2.86792	2.15141	1.86112	2.60211	1.99233	1.9235	2.42596	2.25819	2.68408	2.28923	2.08052	2.8508	2.30124	3.29167	1.89582	2.10402	1.70926	3.05992	2.47042	2.42533
ENSG00000145391	2.31798	2.74048	3.23732	3.30076	2.61811	2.88408	0.914549	3.30649	2.48258	1.98824	2.52281	1.07264	3.03033	1.22084	3.43196	3.2082	2.82335	2.74025	3.23964	3.77863	2.78375	2.12763	2.45349	1.82819	3.00094	2.97409	2.54369	3.72361	3.95331	2.37121	1.57119	4.02895	2.81083	3.38434	2.34077	1.17107	2.45959	1.15321	1.82824	1.51438	3.1664	2.62546	2.75783	3.05607	2.68575	2.90537	2.83102	2.95603	3.48603
ENSG00000213999	0.389299	0.0684547	0.544746	0.46641	0.236081	0.0946887	0.251782	0.327778	0.949777	0.10957	0.3436	0.285263	0.598048	0.390183	0.104384	0.162162	0.137751	0.0354691	0.299989	0.236149	0.183209	0.574488	0.0643301	0.0402282	0.767849	0.108655	0.076079	0.159925	0.0598242	0.310062	0.530015	0.0952141	0.577135	0.236085	0.180703	0.187289	0.0797711	0.0537857	0.16042	0.480101	0.54596	0.103426	0.246258	0.165255	0.462544	0.253862	0.0845522	0.155724	0.225137
ENSG00000187474	1.22599	3.17451	3.30605	3.96452	1.81567	2.4554	1.48149	1.27794	3.0979	2.70331	2.93982	1.60434	3.21996	1.33852	2.77536	1.59838	4.26311	2.03082	1.85107	2.90818	3.12723	0.407189	2.83238	1.94119	5.01672	4.69056	2.05237	3.2549	2.47835	1.99327	3.88299	3.47277	2.911	4.80657	1.09537	1.42989	4.23823	0.928428	2.0597	1.95606	2.40997	3.11768	2.84647	2.67823	2.30963	1.56678	2.75578	3.92017	1.86628
ENSG00000278961	0	0	0	0	0	0	0	0	0	0	0	0	0	0	0	0	0	0	0	0	0	0	0	0	0	0	0	0	0	0	0	0	0	0	0	0	0	0	0	0	0	0	0	0	0	0	0	0	0
ENSG00000074582	2.6131	1.99791	2.4727	2.12601	3.0375	1.79374	3.28684	3.00161	2.93562	2.47322	2.52218	3.44157	2.43495	3.54203	2.17271	2.49041	2.58605	3.37055	2.98079	2.53339	2.38436	3.18594	2.94083	1.83476	2.59787	3.03461	2.23322	2.65218	1.95711	2.92637	3.52054	2.48483	2.92509	2.05664	2.57001	2.39283	2.42151	2.41546	1.94347	2.7946	2.29346	1.75689	2.17296	2.66709	2.24276	2.1232	3.0989	2.51626	2.58896
ENSG00000163950	4.95981	4.6979	4.91846	4.37715	5.01263	3.87015	5.16303	4.50732	4.56271	5.09569	4.25802	3.04945	4.35105	3.94416	4.09818	4.84434	4.75973	5.22354	4.67315	5.44858	5.13765	5.79268	4.54033	4.14536	4.99915	4.7101	4.67345	3.84084	4.88834	5.77633	5.22255	4.11478	5.22245	5.21899	5.05662	4.42871	4.22306	4.64449	3.75754	4.87457	4.69333	4.92322	4.55949	4.81007	4.11313	5.39455	5.47777	4.31478	4.30489
ENSG00000116455	4.00079	3.81808	3.23511	3.59262	4.4483	2.65271	4.05876	4.53679	2.64959	3.58748	3.40152	3.65975	3.81073	3.81143	3.0645	4.19012	4.18196	3.79416	2.6807	3.69344	4.37661	3.97462	3.57061	3.54529	3.90663	4.00201	2.91099	3.86377	3.35808	3.97684	3.646	3.64692	3.83501	2.88436	3.30151	4.22632	2.70765	3.86927	3.63641	3.78979	3.80258	3.56059	3.33677	3.96645	3.28897	3.63613	4.36628	3.90952	3.84319
ENSG00000181350	0.104488	0.0960709	0.682805	0.508186	0.129083	0.154569	0.150129	0.212093	0.462332	0.0990057	0.442179	0.149709	0.329874	0.295146	0.207645	0.613353	0.180939	0.115019	0.257769	0.164744	0.237538	0.304342	0.312365	0.172844	0.409287	0.319353	0.339596	0.105972	0.245231	0.459829	0.845352	0.373751	0.603873	0.493186	0.17128	0.258741	0.276456	0.288819	0.210213	0.195602	1.21173	0.16127	0.546965	0.423771	0.0395587	0.119822	0.0948059	0.264741	0.545266
ENSG00000106399	2.55944	2.42531	2.39267	3.23548	2.88106	2.35372	3.76126	2.548	2.83882	2.58364	2.47255	4.36381	2.62966	4.37134	2.47609	3.22352	2.86441	2.94811	2.35106	2.96439	3.15514	4.2857	4.1931	3.53347	2.86558	2.9932	3.00509	1.99743	2.59633	3.88039	3.65643	3.04918	3.17315	2.75535	2.64328	3.16549	2.63788	3.99745	2.07228	3.48959	3.23143	3.15386	3.44591	2.72135	2.38598	2.81094	3.35135	2.18715	1.74321
ENSG00000106692	1.17436	1.02708	2.01016	1.57908	2.24281	1.68188	2.19531	1.99532	1.27456	1.89866	1.38459	0.806954	1.50776	0.768537	1.38517	2.25182	1.78224	1.89759	1.81301	2.34214	1.41989	1.55373	1.50172	1.44	1.76367	1.82889	1.06101	1.87003	1.82377	1.42035	1.92824	1.52264	1.90087	2.09393	1.44863	1.55593	1.24355	0.591581	1.37283	0.864158	1.89328	1.78006	2.13864	2.16349	1.20121	1.85973	2.24357	1.93951	1.40942
ENSG00000155729	1.02688	1.45992	2.26683	1.95722	2.3301	1.76628	1.94344	2.6849	2.06377	1.40736	1.61867	0.289187	2.56732	0.9946	2.05407	2.0383	1.89717	2.27317	2.02565	2.26888	2.28048	2.47155	1.81289	2.54883	2.04033	1.74117	2.69799	1.93808	1.78057	2.04946	2.32509	1.95557	2.40557	2.21513	1.89761	1.65534	2.28812	0.773443	2.02884	0.808195	3.14719	1.47419	1.64283	1.39267	1.37202	2.29888	2.5612	2.00511	1.95803
ENSG00000153048	5.54862	4.90414	3.31479	3.26992	3.64568	3.7037	5.01899	4.58333	4.60274	4.54018	4.99598	5.34724	4.23093	5.52115	4.56458	3.69569	4.36832	5.20841	5.09946	4.6423	4.91876	4.96615	4.99519	2.63013	4.65944	3.75925	3.12179	5.18416	4.8623	4.54614	4.65925	3.81138	3.6594	3.05317	5.12184	4.56838	4.17294	5.58481	4.85935	5.69848	3.24527	4.28205	3.14621	3.89524	6.01071	4.66628	4.65367	4.93668	3.02047
ENSG00000103449	0.0858253	0.124203	0.936755	0.0794882	0.0814054	0.318834	0.262097	0.103891	0.878527	0.604465	0.560503	0.146754	0.304276	0.0443234	0.395529	0.251578	0	0.0271005	0.228048	0.0558692	0.339438	0.00918708	0.107579	0.0777815	0.380839	0.298491	0.390848	0.0647871	0.763918	0.053027	0	0.307548	0.329345	1.35209	0	0.0428874	0.441459	0	0.0137841	0.0217166	0.999224	0.258622	0.0411566	0.408072	0	0.0180123	0.154863	0.0142467	0.100809
ENSG00000167434	0.0606515	0	0.0172953	0.0622418	0	0	0.0104481	0.0475784	0.0137801	0.00865274	0.203971	0.0931169	0.0371815	0	0.0204862	0	0	0.0625035	0.00974469	0.0155643	0.0211205	0.0213612	0	0	0.0128247	0.0142684	0.046876	0.0875455	0.154419	0	0.0142903	0.0410968	0	0	0	0	0.00890509	0	0	0.0127166	0.207836	0.0147866	0.0943316	0.187499	0.0121755	0.0417132	0	0.0166192	0.0230347
ENSG00000105419	0.728582	0.72132	1.42117	1.56417	0.703057	1.41374	0.879162	0.293157	2.0171	0.561141	2.43255	1.14716	0.81038	1.78569	1.43412	1.20029	0.476746	0.337335	1.15395	0.401443	1.7405	0.901724	0.723779	0.48324	1.39799	1.36235	1.82047	0.703184	0.588898	0.585178	0.380179	1.49786	1.96122	1.82992	0.32356	1.25322	2.38715	0.280612	1.38738	1.95705	0.51831	0.890022	1.39027	1.06297	0.383859	0.160928	0.812914	0.488529	1.92857
ENSG00000172432	3.6262	3.66868	3.94684	2.84769	3.91312	3.61959	3.77284	3.7538	3.50387	3.99414	4.08016	2.23413	3.44981	1.5549	3.59238	3.51278	3.47729	4.19887	3.77775	4.76893	4.61936	3.52574	3.72157	2.96126	3.86072	3.73916	3.07579	3.9216	3.29137	3.98358	3.96694	3.49793	3.22863	3.66882	4.10632	3.53203	3.20907	1.56479	4.0512	2.76781	3.72778	3.73039	3.03211	3.60932	3.91493	3.57328	4.13076	3.62416	4.1898
ENSG00000173950	2.50318	2.2197	4.40417	3.99104	3.19563	3.3197	2.24964	3.86623	3.65632	2.98211	2.41186	1.35258	3.53653	2.05752	2.78916	2.95686	2.65925	3.16342	3.13045	3.00082	3.18416	2.73595	3.22021	5.36338	2.60642	2.18726	4.17568	3.17766	3.72301	3.1975	3.53264	1.99311	3.21886	3.73889	2.52898	3.73655	4.09818	1.22981	2.12719	2.51237	4.18322	2.59215	2.35736	2.91575	2.43855	2.86733	3.036	2.42054	2.77371
ENSG00000150893	0.0030819	0.0509956	4.46126	0.879102	0.0030723	0.0366897	0.0109261	0.0186704	0.0587829	0	0.129835	0.0632668	0.597998	0	0.0997457	0.0221721	0.00547796	0.281528	0.0317882	0.24558	0.0698104	0.149534	0.0544151	0.045737	0.107529	0.394884	2.78723	0.00192527	0.415744	0	0.00855787	1.72339	1.0678	1.67309	0.0145457	0.558176	1.55673	0.00829942	0.0676494	0	0.532066	0.251087	2.0919	0.482813	0	0.055819	0.0748969	0.0024954	4.82918
ENSG00000090372	3.71774	3.48833	4.32343	3.43015	4.11599	3.80218	2.948	4.11052	3.99459	4.18043	3.19932	2.29191	3.84722	2.38262	3.39234	3.76428	3.79942	3.86518	3.66093	4.01044	3.72234	4.17239	3.41425	4.14384	3.55456	4.15453	4.30481	3.48703	3.65642	4.22894	4.18921	3.31688	4.3343	3.94766	3.41608	3.71581	4.05121	2.2668	3.65734	3.46184	3.49755	4.74823	4.11054	3.75022	4.00989	3.29675	3.70644	3.99335	4.27769
ENSG00000160183	0.0732725	0.397598	0.236578	0.50887	0.577134	0.561876	0.0828982	0.103891	1.06297	1.08629	0.125723	0.174395	0.246528	0.00561547	0.0435178	0.0342788	0.347777	0.0798204	0.284147	0.568629	0.808656	0.487964	0.496632	0.167483	0.715839	0.242492	0.0451964	0.0883514	0.110345	2.65599	0.427948	0.218287	0.175706	0.133233	0.0208006	0.16924	0.0781798	0.0641582	0.400544	0.0952492	0.197482	0.170877	0.656152	0.278565	0.0863814	0.044616	0.217335	1.08839	0.0148397
ENSG00000129911	3.53479	3.08333	3.60225	3.42432	3.77903	2.58127	4.11029	3.94701	3.17099	3.965	3.28192	4.86216	3.30874	4.63179	3.36088	3.91444	4.03036	3.63761	3.26395	3.20777	2.95537	4.72326	2.91817	3.41827	3.3812	3.24229	3.91721	3.36453	2.95207	4.42471	3.54707	2.6992	3.92221	3.03062	3.53695	3.84955	3.05462	4.19078	3.10544	5.31404	2.73691	3.43898	3.9245	3.96357	3.79808	4.07743	3.19579	3.37714	4.0016
ENSG00000157399	0.438939	0.285005	0.438852	0.415965	0.324643	0.367801	0.4642	0.390266	0.954331	0.125916	0.907791	0.341115	0.496164	0.56123	1.05104	0.922064	0.292975	0.0453932	0.525603	0.547304	0.97734	0.104848	0.219051	0.195667	1.1098	0.370715	0.392788	0.375549	1.54094	0.223226	0.0358386	0.178138	0.0993891	0.216275	0.143682	0.208853	1.22343	0.227415	0.0621958	0.591742	0.638201	0.170969	0.302567	0.0686102	0.165236	0.13597	0.389628	0.215386	0.174763
ENSG00000136104	0.95962	1.32719	2.54775	2.54092	1.96447	1.4458	2.05519	2.47614	1.52	1.52321	1.1284	2.09026	1.53936	2.12455	0.925476	1.81171	1.74141	1.15072	0.640849	1.76079	1.58472	3.0226	1.83986	2.31523	1.69185	1.11448	2.01434	1.23053	1.32949	2.085	2.01205	1.36568	1.72741	2.00991	0.93614	1.72593	1.33668	1.34689	1.39079	1.52319	2.09961	1.21083	2.25873	1.39632	1.06683	1.216	2.32759	1.52398	1.90249
ENSG00000140391	3.28006	3.28699	4.56906	4.94608	4.1066	3.98357	2.22033	5.62177	3.71267	3.25332	4.15419	2.99081	4.29805	2.65871	3.54544	3.65758	3.95423	3.85771	3.66328	3.07383	4.64792	4.46328	3.38995	3.76531	3.83104	3.66844	4.08062	3.80361	4.98263	3.55108	3.0662	4.51753	4.17821	4.74327	3.10302	4.23797	3.98397	3.52149	3.81302	3.39808	4.37877	3.3221	5.34866	4.1492	3.37448	4.67613	4.17005	3.37807	3.95124
ENSG00000101544	2.29631	2.09033	2.95959	2.36434	2.33528	2.68915	2.983	2.80152	2.05047	0.622396	2.31771	0.965696	2.89038	1.22942	2.55356	3.00339	2.0077	3.03958	2.72382	3.66962	2.25401	2.16514	2.55206	2.69204	2.61178	3.04272	3.08493	3.34107	3.01791	2.94697	3.18119	2.15203	2.60827	2.79352	2.57778	2.64281	2.57005	0.397966	2.12208	1.61583	2.83843	3.04596	3.91329	2.72026	3.2059	2.58536	2.61688	2.99587	3.03845
ENSG00000091592	1.96735	2.0212	1.16898	1.28498	2.35592	2.24553	2.37154	2.27586	3.11007	2.69337	2.28606	1.28037	1.65504	1.29952	1.83971	2.09266	1.77557	1.39792	2.92587	2.23083	2.05154	1.61393	1.31283	0.698538	1.76035	2.00078	1.21242	2.35242	0.976914	1.8644	1.7648	1.5414	1.67812	1.56157	2.62837	1.94866	1.27305	2.44682	2.22333	1.54193	1.69444	1.89374	1.36629	2.70204	1.37001	2.48965	2.0795	2.08884	2.75702
ENSG00000065923	2.13437	1.20307	3.3775	1.52873	2.88877	2.62154	1.11036	2.04956	1.91225	0.494062	2.06768	0.572669	1.32141	1.39159	1.67305	2.36654	2.06359	0.841248	1.32752	1.68514	2.51401	1.31522	3.19807	1.97026	1.67924	1.90855	2.45529	1.24361	2.56817	1.45397	2.2227	1.66438	2.24295	1.89244	1.21181	0.574716	1.69705	1.66506	1.74979	0.717075	2.62856	1.02973	1.99313	1.17825	1.72045	1.71154	2.11242	1.85881	2.22904
ENSG00000106477	0.701959	0.769853	1.00279	1.0519	1.02003	0.703536	1.06697	0.0974105	0.744803	0.739473	0.730432	0.935944	0.761272	0.769266	0.889432	1.54282	0.447253	0.928202	0.672238	0.72675	0.85886	0.725242	0.974031	0.455741	0.775146	0.999206	1.1128	0.633835	0.557441	0.370512	0.367321	0.824927	0.771502	1.11774	0.64188	0.54803	0.618313	1.12346	0.578166	0.611384	0.75488	0.663807	0.91659	1.00125	0.434558	0.40641	1.42694	0.756591	0.621673
ENSG00000261732	0.0553111	0	0.058202	0.0229744	0.0232324	0.0500569	0.00951352	0.060362	0.0125488	0.00787829	0.0296087	0.125694	0.0669891	0.0295907	0.0232868	0.0112986	0.0330536	0.0369025	0.0132888	0.038649	0.0144521	0.048159	0.0181463	0.0140857	0.0116784	0.032267	0.0108019	0.00585638	0	0.0207235	0.0763764	0.0188495	0.0314266	0.0147575	0.0510386	0.0172444	0.0161709	0.043699	0.0717778	0.117187	0.0265294	0.0201517	0.0307276	0.030061	0.0220894	0.0191344	0.0372821	0.00758758	0.0365211
ENSG00000138617	1.2179	1.2906	2.19922	2.51107	1.85623	2.23973	2.10461	2.647	1.76487	1.21341	1.36209	1.30347	2.04172	0.756378	1.67907	1.26673	1.41212	1.44851	1.08024	1.4435	1.9424	2.92395	2.07292	2.04848	1.31701	1.23597	2.27051	1.22187	2.46954	2.04142	2.98739	1.75031	2.28554	2.06484	1.83155	1.82605	1.41603	0.748663	1.16872	1.68629	2.84147	0.900824	2.79377	1.46774	1.18038	1.75014	2.36694	1.57198	1.31381
ENSG00000182983	0.574593	0.392769	0.29264	0.250603	0.18883	0.424426	0.124793	0.153432	0.460758	0.0489524	0.670614	0.121228	0.257676	0.426477	0.864336	0.141749	0.08524	0.12128	0.383595	0.114999	0.334429	0.345971	0.0564308	0.0487323	0.243144	0.296421	0.231048	0.771612	0.786864	0.72887	0.0801277	0.52262	0.353448	0.307565	0.529208	0.785948	0.521209	0.139513	0.0899104	0.172471	0.209101	0.804224	0.0638182	0.22143	0.551868	0.470615	0.143397	0.107757	0.0966048
ENSG00000033030	2.4059	1.7659	2.47903	1.68749	1.98077	1.70275	2.19294	2.47273	1.87121	2.20458	1.83475	0.53241	2.07018	0.592659	1.50944	1.47786	1.87172	2.26793	1.789	1.9432	1.98316	2.46976	2.29283	1.62132	1.77859	1.63683	2.0959	1.93482	1.96151	2.03376	2.38805	1.70134	2.05132	1.98497	2.08447	1.84959	1.39433	0.656469	2.06587	1.06628	2.49415	2.05744	2.13076	2.04253	1.98026	2.19792	1.91184	1.85512	1.91026
ENSG00000177425	3.02009	2.67377	2.59959	3.25285	2.60627	2.92095	2.64809	3.11633	2.87626	2.38656	2.74506	1.37262	2.88045	1.5225	2.62483	3.39191	2.52352	2.89354	2.9654	3.10841	2.77807	2.71901	3.05989	2.59378	2.16588	2.64739	3.41162	2.62505	2.91194	2.92145	2.5153	1.62492	2.88449	3.09496	2.59493	2.72335	2.95572	2.03008	2.81431	2.32259	3.03724	3.04551	2.77363	2.59363	2.47102	2.93008	2.90746	2.12796	3.45887
ENSG00000215187	0.203787	0.106161	0.606008	0.284627	0.791618	0.260589	0.107084	0.176734	0.346307	0.117729	0.594345	0.372378	1.0106	0.599162	0.39598	0.0854818	0.124282	0.123535	0.350952	0.287333	0.43482	1.85162	0.439605	0.326435	0.287895	0.507356	0.214695	0.0776055	0.313092	0.767273	0.453472	0.861424	0.435778	0.332772	0.0839418	0.32072	0.0156961	0	0.260653	0.392691	0.0409873	0.089097	0.50369	0.292513	0.0839204	0.674489	0.112766	0.180218	0.136878
ENSG00000157800	1.77667	1.89517	2.63045	2.98327	2.24886	1.6835	2.06692	1.45061	2.06708	2.01369	1.99262	0.764108	2.4596	0.874924	2.09341	2.61089	1.95369	2.02295	1.53641	1.43085	2.03302	1.81288	1.65775	2.69485	1.94854	1.93072	2.9661	2.25303	2.21395	1.49541	1.65909	1.58137	2.38956	2.63174	1.65909	1.48879	1.93013	0.667069	1.81338	1.11468	1.89182	2.11798	2.2535	2.19697	1.88104	1.90697	2.35366	1.9102	2.64528
ENSG00000170275	3.05198	3.42463	4.92394	4.96024	3.58439	4.09116	4.63457	4.17071	4.16203	2.8534	4.61181	3.83498	4.2724	3.13871	4.25409	4.30583	4.00025	3.32557	3.99758	3.32915	4.05744	3.98905	3.69849	4.8883	4.42385	4.17824	5.00266	4.25205	4.05706	4.16898	4.0464	4.61839	4.32756	4.69884	2.90113	3.74867	4.23434	2.12041	3.68576	3.23684	5.64968	4.05316	4.01726	4.14086	3.68066	4.41187	3.76946	3.89091	4.14622
ENSG00000089163	0.49739	0.575221	0.800433	0.750288	0.771919	0.645442	0.575511	0.325079	0.950731	0.551275	1.64329	0.70328	0.46443	1.47938	0.581541	0.531546	0.87446	0.337407	1.05346	0.415215	0.664541	0.559174	0.59483	0.663947	0.474736	0.688121	0.836836	0.389836	0.173838	0.574053	0.947153	1.08641	0.553767	0.760929	0.489115	0.315651	0.288151	1.37255	0.76267	0.868225	0.893291	0.385741	0.774323	0.401836	0.304934	0.120732	0.185128	0.463847	0.272043
ENSG00000123384	3.28371	3.53408	4.70958	4.80296	3.69229	6.64135	3.28185	3.80169	4.26532	3.0008	4.54964	2.48215	5.25565	2.7636	4.40226	4.50717	3.31318	3.48576	3.88722	5.49871	3.50896	3.65962	4.2665	4.19315	4.42888	4.57085	4.45816	3.90234	4.23716	3.96915	4.81242	5.22981	4.44866	4.83373	3.30241	3.58892	5.76871	2.40459	3.61198	2.598	4.52625	4.89501	3.1618	4.48699	3.63664	4.00741	4.26194	4.27645	5.23205
ENSG00000066654	2.62396	2.71651	4.04677	3.12695	3.16571	2.94801	3.02714	3.40324	2.97997	3.18881	2.96199	1.6037	3.08647	1.71949	3.18718	2.54435	3.30335	3.56997	3.05946	3.54541	3.10189	2.63342	2.88839	2.74245	3.21679	2.89887	2.85471	3.0421	3.6167	3.02216	3.62081	3.18706	3.25963	3.44044	3.0506	2.66092	3.28075	1.05331	2.94712	2.42053	3.24001	3.17286	2.93766	2.74856	2.52625	3.23371	2.90908	3.02548	3.04403
ENSG00000163331	1.48441	1.97222	4.32315	3.9933	4.08597	5.32878	0.0660227	3.66026	4.88286	0.0815222	0.699307	1.59142	5.44007	5.23017	3.14079	0.106369	1.10314	3.30503	2.9656	3.58675	3.08441	2.40613	3.2359	5.47403	2.15896	0.0229122	6.27173	3.47688	4.92843	2.39222	4.37299	0.365749	1.62514	2.39925	2.52395	4.47287	4.85662	3.09956	0.366067	0.409225	5.45444	2.55131	1.94538	0.935665	0.72702	2.74275	1.9039	0.95088	1.79187
ENSG00000106868	1.17938	1.35815	2.26676	2.07691	1.8481	2.41697	1.43158	1.02131	1.15287	1.28465	1.75724	0.786112	1.52658	1.72741	1.47816	2.1072	1.3542	0.721391	1.31982	1.64073	1.58278	0.931774	2.1204	1.51038	1.80702	1.86311	1.41154	1.29591	1.3755	1.60416	1.54071	1.97833	2.12243	2.10398	1.31052	0.936229	1.77025	0.843436	1.32587	0.77664	1.66629	2.18463	2.45301	1.82653	1.23001	1.50383	2.44886	2.15957	1.90202
ENSG00000162733	1.01557	1.0111	2.2763	2.74135	0.727628	1.5246	1.15482	0.827092	2.06598	0.466627	2.92354	0.188175	1.74978	0.534527	2.08752	1.75769	0.508686	0.610955	1.46505	1.35802	1.51803	0.422609	1.05484	0.614312	2.99079	2.0524	1.55297	1.82864	2.46158	0.53311	0.964394	2.51723	1.55929	2.86693	0.582969	0.44372	3.28879	0.204953	0.446703	0.669047	1.51829	1.26016	0.806944	1.91839	0.556791	0.762007	1.29746	0.999893	1.01036
ENSG00000186710	0.164272	0.061232	0.336321	0.103396	0.137749	0.195675	0.0577358	0.411008	0.389577	0.0121373	0.0454316	0.408952	0.793522	0.140532	0.111484	0.0683577	0.0255653	0.12278	0.118577	0.296896	0.0585551	2.20264	0.159854	0.0144863	0.217876	0.0783833	0.173189	0.035769	0.140119	0.123388	0.371372	0.0685986	0.236807	0.0887562	0.152014	0.275319	0.0124908	0.094619	0.324063	0.483243	0.363272	0.0411537	0.167827	0.17625	0.0170703	0.141429	0.313064	0.0687601	0.063788
ENSG00000033170	1.29422	1.2741	3.33125	2.97193	1.75245	2.26155	2.35039	1.57163	2.43557	1.55327	2.41846	0.69162	2.47072	0.710043	2.22373	1.6865	1.56658	1.12789	1.64652	1.86201	2.4191	0.652647	1.49244	2.55383	3.27119	2.32568	2.47929	1.66799	2.16632	1.21932	2.26289	2.51207	2.65884	2.67678	1.301	1.10021	2.05839	0.257701	1.25998	1.58743	3.39487	1.61318	2.71027	1.76985	1.20361	0.729465	1.55148	1.68215	2.96798
ENSG00000005022	8.24219	8.00623	8.09665	9.74056	8.00281	8.19587	8.02344	7.75919	7.9851	7.59649	7.51327	8.414	8.55132	7.37408	8.12418	8.34519	7.74675	8.3855	7.96792	8.08354	7.99797	8.52414	8.05317	8.96568	7.89693	7.84281	8.90373	7.89116	7.69211	8.27187	8.53542	7.12334	8.17491	8.05291	7.93381	8.22036	7.86053	8.51104	8.11736	8.24805	8.22392	8.26021	8.51993	8.86485	8.11523	7.86993	8.18889	7.67022	7.65893
ENSG00000169035	8.44713	7.01223	5.03688	2.87405	1.23257	6.74208	4.11942	2.24075	5.42748	1.02604	7.42303	4.35553	4.19435	4.59141	6.75084	0.898795	5.91487	6.16268	5.88311	3.18955	7.26684	0.471176	7.96962	0.0705181	3.90913	5.77838	1.77637	7.12928	5.36534	0.298101	0.627838	1.28279	2.9524	2.60248	6.79457	6.48474	2.62607	4.89125	7.02464	2.25245	3.07581	4.69117	1.00676	3.83713	7.12427	4.96453	5.55138	6.2983	3.26172
ENSG00000118482	2.06435	1.99258	4.24806	2.56412	2.45651	2.98503	2.74434	3.16673	2.43307	2.9952	2.74726	0.82444	2.98533	0.9193	2.51557	3.21878	2.57235	2.87189	2.75172	3.24309	2.15483	2.21548	2.95163	3.14619	2.92932	2.6323	2.62351	2.76134	3.35525	2.93704	3.09859	3.03421	4.15451	2.96374	2.31421	2.36775	2.99364	0.617631	2.42167	1.76589	3.74363	3.05697	3.12002	2.53816	2.18628	2.7458	2.7106	2.7697	3.09154
ENSG00000275591	0.0099144	0.0128184	0.147307	0.0775551	0.00495025	0.358842	0.025043	0.263415	0.0394823	0.00417548	0.0518386	0.0567977	0.213293	0	0.0295187	0.04725	0	0.0087667	0.0554526	0.126255	0.0254024	0	0.00963362	0.115157	0.0185009	0.0475686	0.0890216	0.0154479	0.00559832	0.0595217	0.438206	0.0396223	0.0208698	0.113212	0.0078356	0	0.0340264	0	0.0103506	0	0.60655	0.0177924	0.348769	0	0	0.0101598	0.015905	0.00803125	0.00558292
ENSG00000151651	2.88356	3.63194	1.82299	2.7578	2.65116	2.17029	5.39554	2.56326	3.35305	3.17216	3.61806	3.28266	2.40795	2.28933	1.47155	2.7912	2.68029	1.98922	2.23839	3.00435	2.42525	2.09861	3.90734	1.51154	3.71486	2.2044	1.56534	3.33054	3.42208	4.9262	3.7762	2.59053	2.43826	2.67195	4.20361	1.30933	2.85514	2.44228	2.46381	2.99097	2.00984	2.98256	2.24961	4.71453	4.28906	1.46616	4.48119	3.93278	1.83135
ENSG00000164061	0.0274996	0.0106073	0.131584	0.0650288	0.0289224	0.0865261	0.223085	0.031452	0.0307001	0.023152	0.0355638	0.0598166	0.264861	0.0783083	0.0559271	0.0440032	0.00820815	0.0243333	0.0246219	0.0289314	0.0236446	0.0443233	0.0193512	0.0397171	0.0949572	0.0771626	0.0524228	0.0304964	0.0190064	0.0170285	0.0954664	0.102173	0.10918	0.0384365	0.0072903	0.0113445	0.067778	0.00207908	0.0614811	0.00571343	0.473711	0.0480414	0.122787	0.051422	0.0036488	0.0343633	0.0294518	0.0442645	0.637325
ENSG00000205795	0.512481	0.517096	1.27631	1.8973	0.679254	1.46917	0.574236	0.290032	1.96077	0.526549	1.62979	0.661616	1.13285	0.821772	1.6771	0.837459	0.217333	0.182229	0.990402	0.424063	1.72971	0.156142	0.654632	0.592449	1.27599	1.3545	1.71574	0.370679	0.302874	0.498513	0.307211	1.12819	0.460408	1.82331	0.418818	0.565494	1.8025	0.308412	0.894415	1.34356	0.778384	0.666921	0.623673	0.384343	0.248066	0.120908	0.536608	0.300793	0.591699
ENSG00000092094	2.10058	1.8408	2.49353	2.4432	2.35702	2.5492	2.18152	1.98874	2.73706	2.4423	2.22755	2.37047	3.13854	2.87773	2.15874	2.09399	2.26987	1.82691	2.51175	2.26854	2.24276	3.56203	2.3397	2.36255	2.30712	1.96824	3.15363	1.71632	2.02565	2.62903	2.8659	2.03988	2.4971	1.75739	2.26043	2.39838	1.59037	2.56999	1.7664	3.09949	3.10405	1.67191	2.38157	2.54516	1.30827	1.68862	2.09674	1.62411	1.25952
ENSG00000198642	2.62254	2.42969	3.92161	3.4567	2.11479	2.90095	2.87716	2.87738	2.42866	4.22615	2.47874	0.914171	2.62834	0.598508	2.56354	2.80864	2.75722	2.39837	2.32832	2.42549	2.48983	2.22232	2.44104	2.98133	2.47804	2.72871	2.61702	2.75486	1.62103	3.21296	2.9429	2.51236	2.79846	3.48963	2.47966	2.46566	2.76742	0.102674	2.5578	1.73726	2.23086	2.77874	3.74792	2.16226	2.05995	2.30313	2.4893	3.33231	3.0785
ENSG00000124251	0.11848	0.0693341	0.132466	0.107471	0.133169	0.365867	0.187887	0.347886	0.126751	0.119476	0.284473	0.0928202	0.178672	0.204745	0.41835	0.674237	0.0990325	0.324437	0.1268	0.32785	0.145131	0.177388	0.0929204	0.193132	0.209933	0.379794	0.135864	0.218973	0.174646	0.235646	0.308153	0.163255	0.188858	0.238947	0.216896	0.135288	0.109684	0.0437475	0.215201	0.350859	0.521751	0.183377	0.154642	0.331382	0.139296	0.189473	0.36105	0.157665	0.35877
ENSG00000074800	9.52493	9.34359	8.48573	8.68354	9.02496	9.40531	9.94535	8.69218	9.05497	9.78128	9.0756	9.38366	8.89343	9.98069	8.38199	9.05006	9.43793	8.99272	10.0162	9.50102	9.0905	9.31547	9.83501	9.4713	9.41606	9.56668	8.55281	8.7643	9.0962	9.9487	9.98632	7.79875	9.27984	8.80304	9.61352	9.38021	9.28812	10.1443	9.26907	9.84789	7.99757	8.77121	8.98058	9.10884	9.25222	7.9883	9.50182	9.26743	8.60621
ENSG00000122483	0.504673	0.671294	0.803013	0.786356	1.14372	0.553206	1.55696	1.38255	0.442873	0.980637	0.578598	0.501833	0.781575	0.477017	0.413943	0.908578	0.895351	1.17299	0.830816	1.36997	0.686364	1.3231	0.567253	0.461787	0.653072	1.26218	0.662366	0.863285	0.946471	1.30882	1.6516	0.768747	0.995847	0.872764	0.552813	1.10065	0.734164	0.0701785	1.05684	0.595043	1.03516	0.833865	0.902579	1.2711	0.42918	0.654781	1.02828	0.78487	0.765118
ENSG00000145214	2.88637	2.33551	2.45553	2.11245	3.41254	2.55804	2.12689	2.21924	3.10699	3.29393	2.44666	1.30535	2.80593	1.84014	2.49529	2.76351	2.81456	3.06629	3.09197	3.00601	2.75807	2.72765	2.05909	2.68139	2.98153	2.31611	2.5108	1.95895	2.64027	2.6209	2.67562	1.974	3.18315	2.44952	2.87898	2.69714	1.99734	2.13415	1.87486	2.44562	2.56956	3.36182	3.07637	2.43443	2.78197	3.80055	3.45333	2.98438	1.79441
ENSG00000144320	1.86747	2.28065	3.96964	2.57821	2.61626	2.62622	2.3707	2.69547	2.41771	2.18243	2.31469	0.884388	2.88094	2.11829	2.54541	2.4397	2.22562	2.6456	2.38991	2.61872	2.38312	2.78123	2.14941	3.81146	2.05593	1.86439	2.71504	2.38772	2.49797	2.55852	2.93497	2.48171	2.99731	3.32691	2.58592	1.97195	2.49942	1.2322	2.36952	1.19191	3.37747	2.43386	3.08839	2.28191	2.46408	2.08636	2.44408	2.23241	1.98923
ENSG00000134240	0.0289098	0.754388	0.048393	1.06857	0	0.0232595	0	0.0798402	0	0	0.0705453	0.0224957	0.023482	0	0	0	0	0	0.0183204	0.262335	0	0.0201483	0.117985	0.0290284	0	0.0660606	0.0111869	0.0300757	0.0852412	0	0	0.106056	0.255667	0.0152828	0	0.825547	0	0	0	0.0119926	0.0544262	0.00698947	0.0452383	0.384406	0.0114821	0.096458	0.0155635	0	0
ENSG00000005483	2.16754	2.32257	3.83586	3.58695	2.78376	3.51156	2.54955	4.59798	2.62712	2.63317	2.58441	0.855635	3.65528	0.64984	2.80384	3.31543	2.51411	3.54875	2.8673	3.59322	2.44639	2.30898	3.38264	2.75693	3.21627	2.97694	3.01386	2.96408	3.20077	3.59817	3.55799	2.7943	3.028	3.46092	2.89001	2.28064	3.58339	0.809559	2.6392	1.24147	3.31343	3.01256	3.03354	2.76737	2.95351	2.80964	3.30487	2.9629	3.63425
ENSG00000088280	3.79614	2.37622	2.60927	3.15682	1.96922	3.01565	2.34072	1.73553	3.16899	1.08781	3.49764	2.01348	2.79004	2.06413	2.81689	1.20898	1.46308	1.88587	3.47651	1.46083	2.19978	1.78969	1.8608	1.12684	3.05889	3.3811	2.67004	1.77273	3.52919	0.946288	1.84516	3.68987	2.7497	2.56518	2.42113	2.85086	2.36606	3.30247	3.13747	0.813309	2.92051	2.09142	1.89742	2.58009	3.57463	1.50177	2.19117	2.76002	2.86638
ENSG00000197261	3.4314	1.63341	1.24926	0.130282	3.14794	2.03508	1.97469	0.165602	1.89917	1.51848	2.60045	1.45697	0.706114	2.96251	1.46612	0.921252	1.75364	2.17471	3.09579	1.59295	2.26476	0.745386	0.998161	0.26476	0.826194	1.8239	0.935219	1.33014	0.83599	1.77586	0.219274	0.576067	0.544771	0.323599	3.43224	2.30533	0.974406	0.990511	4.53815	3.06944	0.682727	1.90767	1.22126	1.92008	1.81948	1.50497	1.89246	1.21007	2.45729
ENSG00000152256	0.934656	1.50756	1.8825	2.01083	1.09434	1.60396	1.15396	1.42855	1.86585	1.32871	1.06745	0.315364	2.49254	2.01239	0.979996	1.82173	0.721564	0.834259	2.11592	1.66823	1.58822	0.906591	1.47339	2.63196	2.22944	0.846444	2.01738	1.13283	1.7322	2.67723	2.47568	0.785611	1.82278	1.2238	1.66637	1.41818	1.72653	1.47003	1.25982	0.589465	2.01925	2.46955	2.09709	1.13745	1.67633	1.69742	1.81637	1.23624	2.01134
ENSG00000143515	1.99541	1.45385	3.12205	2.65945	1.1293	2.31261	1.17258	1.12336	2.99258	2.02081	2.85886	1.10247	2.8121	1.22171	2.34719	1.68475	0.582254	0.764327	2.61769	1.46492	1.6083	0.572474	1.60772	1.68183	3.32827	2.96573	2.51749	1.68906	1.94945	0.908989	2.80352	2.84085	2.45328	2.46276	1.4391	1.63899	2.91512	0.474423	1.69658	0.842846	3.1122	2.21493	1.82707	2.35743	0.83519	0.894745	1.41591	1.96981	2.88535
ENSG00000197361	0.0873232	0.0585421	0.101385	0.242859	0.199536	0.127632	0.114869	0.553617	0.149823	0.0230983	0.23665	0.123583	0.369434	0.0938115	0.386204	0.448886	0.237941	0.68788	0.224278	0.439872	0.242438	1.22692	0.12248	0.322647	0.139878	0.111027	0.314594	0.190134	0.989184	0.125145	0.422785	0.539548	0.414307	0.356499	0.356717	0.443951	0.287002	0.0549832	0.189449	0.375081	0.37946	0.0681462	0.154847	0.217733	0.155348	0.586633	0.11753	0.213264	0.090542
ENSG00000136826	5.84013	5.56572	3.10337	4.2539	3.58464	4.23428	5.56296	6.49518	5.13725	6.73515	3.84858	4.03207	5.84096	2.73131	4.8721	1.64818	3.76191	6.96742	5.6109	7.17796	3.68213	4.38694	3.73764	3.60726	5.88379	4.46144	4.4438	4.72602	6.40938	4.26151	4.9938	3.18484	5.18146	3.9234	6.26644	5.696	4.55826	5.38673	5.32538	2.90663	4.85031	4.53166	5.72212	7.29727	5.6221	7.1285	4.18472	4.78838	4.60619
ENSG00000135835	0.280225	0.137276	0.613994	0.385246	0.676937	0.444335	0.348288	0.540422	0.659566	0.589664	0.502887	0.473402	0.403575	0.389143	0.317909	0.827204	0.295146	0.196454	0.287784	0.25042	0.439247	0.122561	0.208383	0.420386	0.62023	0.4149	0.321132	0.339844	0.379872	0.522551	0.331112	0.479601	0.616857	0.48559	0.385566	0.129913	0.383755	0.0456272	0.231562	0.187682	0.629306	0.356663	0.519821	0.577471	0.0901524	0.205953	0.637148	0.463393	0.670138
ENSG00000187581	0	0	0	0	0	0	0.13641	0	0	0	0.186667	0.463641	0	0.0585436	0	0.0280614	0	0	0.0437958	0	0	0.0946933	0	0	0	0.0637813	0	0	0.28711	0	0	0.0374281	0	0	0	0	0.0400627	0	0	0	0.152209	0	2.56482	0	0	0	0	0	0
ENSG00000131738	0.155465	0.0128184	0.0494426	0.054133	0	0.0355075	0.0299998	0.220053	0.0779129	0	0.135902	0.0343462	0	0.860827	0.412234	0.0267683	0	0.664602	0.134829	0.0445432	0.0602308	4.52848	0.0568598	0.0296623	0.0367675	0.119288	0	0.0637983	1.58794	0.0164782	0.175681	0	0.0125581	0.0463562	0.134915	0.156484	0.20432	0.307076	0.571453	0.0720215	0.0985942	0.0423387	0.134443	0.0239188	0.539294	0	0.0929018	0.0475302	0.0166843
ENSG00000130037	0.0177656	0.0380513	0.122669	0.45038	0.00888241	0.0213713	0.00904949	0.0493959	0.221781	0	0.0466557	0.020669	0.0741444	0	0.144355	0.0267209	0	0.0235072	0.0168308	0.0661938	0.0892739	0	0	0.04419	0.430661	0.0726227	0.0899444	0.054759	0.0495325	0.0583588	0.0961834	0.89183	0.210495	0.0955192	0	0.0218328	0.0153839	0	0.018545	0.0327973	0.154409	0.0064191	0.082017	0.124478	0.031411	0	0.110595	0.176826	0
ENSG00000260300	0.00816851	0.0210492	0.0273504	0.068978	0.212244	0.149811	0.0329027	0.213653	0.0644562	0.013707	0.0172802	0.0743702	0.142184	0	0.00816225	0.0770077	0.0430681	0.0567915	0.0533097	0.0960609	0.0333737	0.0667334	0.099924	0.0721938	0.0502216	0.140806	0.0280786	0.050267	0.0808283	0.0447845	0.0337863	0.0262221	0.0543524	0.0382775	0.0756163	0.0784767	0.0350099	0	0.0170061	0.0201283	0.317186	0.0349516	0.00771423	0	0.0288151	0.0656448	0.138037	0.0132022	0.071874
ENSG00000237700	0	0	0	0	0	0	0	0	0	0	0	0	0	0	0	0	0	0.030716	0	0	0	0	0	0	0	0	0.0201211	0	0	0	0	0	0	0	0	0	0	0	0	0	0	0	0.0327896	0	0	0	0.0279592	0	0
ENSG00000075643	1.9685	1.34037	1.70062	1.91193	2.26365	1.84583	3.43382	1.84419	1.57429	2.16277	0.821931	2.15312	1.70201	0.770943	1.50201	2.88301	3.009	1.50493	0.941615	2.5627	2.70123	2.54631	1.90908	2.36498	3.6584	2.63257	0.33853	3.43466	3.20988	4.54344	2.01117	1.57232	1.08118	0.953989	1.29688	2.67592	3.33413	1.87766	2.36607	1.80639	2.93377	1.13535	2.41382	1.81451	1.41934	2.11385	2.71824	3.62938	1.44882
ENSG00000131165	5.84291	5.33242	4.82332	5.26516	5.80674	5.66926	5.68125	5.52052	5.45694	5.74979	5.16643	5.92208	5.27247	6.81003	5.4383	6.22477	5.42067	5.02198	5.24148	4.97733	5.53476	5.77811	6.02654	5.18419	5.5546	5.92233	5.1885	5.37298	5.16549	5.78114	5.67701	5.04496	5.57408	4.82897	5.92748	5.59833	5.38611	6.43254	5.31405	6.14679	6.19908	5.03746	4.33829	5.71256	5.70525	5.60393	6.06502	5.63333	5.62844
ENSG00000179546	0.814521	0.212105	0.270515	0.154566	0.293587	0.389047	0.192746	0.0164495	1.25012	0.0794005	0.578623	0.245217	0.171839	1.52038	0.32974	0.816141	0.0156185	0.182953	1.21848	0.0717742	0.257547	0.342368	0.214758	0.345211	0.297529	0.257565	0.126673	0.176204	0.412709	0.377387	0.0482995	0.31281	0.768357	0.145659	0.762003	0.0322282	0.0816587	0.0697315	0.921768	0.0216786	0.559908	0.430751	0.453921	0.330114	0.391326	0	0.186129	0.199873	0.203356
ENSG00000062524	0.110397	0.124404	0.274309	0.213165	0.076563	0.423562	0.064103	0.339682	0.635312	0.191637	0.205322	0.571657	0.496731	0.457504	0.103662	0.0758658	0.050143	0.0980033	0.0920743	0.183462	0.140685	0.320369	0.0479621	0.593663	0.587212	0.375002	0.0726008	0.103651	0.599923	0.0392777	0.304598	0.297244	1.60884	0.210271	0.0224762	0.30866	0.311299	0.0287298	0.175996	0.0860939	2.2986	0.0754161	1.40708	0.273645	0.175687	0.255275	0.1109	0.210291	0.264493
ENSG00000230430	0	0	0	0	0	0	0	0	0	0	0	0	0	0	0	0	0	0	0	0	0	0	0	0	0	0	0	0	0	0	0	0	0	0	0	0	0	0	0	0	0	0	0	0	0	0	0	0	0
ENSG00000089597	6.61188	6.14922	6.88397	6.76449	6.65384	6.37846	6.55743	6.37551	6.23927	6.49543	5.99939	4.78719	6.58299	5.28345	6.91405	8.15823	6.14356	6.24577	6.9767	6.87245	5.87745	6.07213	6.03063	7.90667	7.0743	7.12096	6.46882	6.4582	6.70976	6.4366	7.03552	6.1424	7.16133	7.11328	6.1817	6.78878	6.48581	4.77861	5.66872	5.58248	7.06713	6.79034	6.22451	6.97409	5.57797	6.48941	6.97486	6.62399	7.45335
ENSG00000058272	1.98535	2.17994	3.0401	2.98055	2.50332	2.47899	2.36576	2.87332	2.21399	2.35517	2.47725	0.815732	2.72625	0.897197	2.31013	3.00791	2.92769	2.70169	2.53268	2.95085	2.79439	1.75811	2.58708	2.31861	2.62104	2.63147	2.98853	2.74594	2.88398	2.52717	2.79065	2.64984	2.80532	2.92611	2.24294	2.0866	2.57628	0.973009	2.3964	1.27046	3.00268	2.91646	2.65399	2.64699	2.27226	2.51882	2.80394	2.60743	2.89545
ENSG00000133422	3.33906	3.35023	3.93299	3.09443	3.40404	3.97729	3.05658	4.37834	4.01767	3.75376	3.21496	3.85155	3.84045	2.7787	3.37628	3.13978	3.24283	3.92952	3.87033	3.65969	3.01646	3.76386	2.73747	3.17517	3.31483	3.87185	3.92958	3.11654	3.98898	3.02752	3.38125	2.83371	3.70432	4.28495	3.71598	3.71523	3.23872	2.15417	3.32793	3.58099	4.16626	3.31795	3.89628	3.4194	2.49869	3.08352	3.08131	3.42865	3.6908
ENSG00000166250	2.76752	2.36184	2.41268	2.88733	2.22995	2.1806	2.56699	0.806886	4.22041	2.92057	3.44744	0.854827	1.42461	2.24541	2.95362	1.80125	3.01496	1.22007	4.00758	1.30158	4.28109	0.407431	0.907842	0.814472	4.1437	3.91105	1.25937	3.41829	2.07454	3.1389	1.35474	2.95983	1.68347	3.4081	2.71449	0.757936	3.10383	1.11811	1.49357	2.47507	1.69507	3.00507	0.724508	3.495	3.14724	0.952131	2.19817	3.23732	1.01566
ENSG00000124731	1.27649	1.44636	1.11206	0.684623	0.561055	2.11924	0.658028	0.328066	2.10242	1.87756	2.52976	1.7963	0.827644	2.7487	1.83128	0.464322	2.09004	1.52285	4.70995	3.53925	4.2154	0.104568	3.85735	1.32007	1.266	1.02119	0.575362	1.90493	1.30891	1.0105	0.854573	0.745301	0.73742	2.19927	0.0625417	0.167722	1.41555	4.52586	0.893525	4.07671	0.626139	0.964813	0.971612	2.39186	2.65119	0.409825	0.629972	1.89716	0.977314
ENSG00000133794	1.82703	1.01215	2.41094	1.14658	2.01303	1.34525	2.54033	1.78985	1.61585	1.34072	2.04157	0.700202	1.45616	0.444669	1.35709	1.81872	1.40938	1.91618	1.43295	2.0554	1.87918	1.00767	1.59077	1.28374	1.59343	1.38113	1.19435	1.41164	1.85726	1.98606	1.76251	1.01475	1.57706	1.54666	2.02411	1.52077	1.89793	0.423232	2.00674	0.539117	1.74221	3.18842	1.83754	1.18616	1.31291	0.93298	1.78497	2.054	2.19498
ENSG00000162670	0	0.0126236	0.0123301	0.0792611	0	0	0	0.118895	0.0195748	0	0	0.0170131	0	0.0185795	0	0	0	3.33466	0.0343802	0.0055577	0	0	0	0	0	0	0	0	0	0	0.0101847	0	0.00619682	0.0115511	0.011559	0.00901416	0.00634325	0.0294312	0	0.552146	0	0	0.00692115	0.0581856	0	0	0	0	0
ENSG00000153933	0.676405	0.349125	1.26774	1.15429	0.319988	0.634393	0.10533	1.35592	0.576804	0.0877159	0.436738	0.357114	0.998212	0.267737	0.515653	0.539899	0.236114	0.885215	0.535345	0.648512	0.373961	1.33796	0.546873	0.678641	0.681502	0.546524	0.922307	0.573805	1.03452	0.573454	0.949628	0.451792	0.93196	1.13887	0.583719	0.761392	0.82049	0.358966	0.396623	0.323377	1.13555	0.364905	1.54034	0.791453	0.317486	1.32334	0.856857	0.464861	0.976021
ENSG00000135333	0.0100343	0.07889	1.24152	0.366841	0	0.00806286	0.00340507	0.0403189	0.0702837	0.00281877	0.014176	0.0155515	1.65415	0	0.0265844	0.0100928	0.0118926	0.989138	0.0622149	0.0597931	0.0274057	0	0	0	0.0494005	0.0322687	1.77562	0.0166707	0.302743	0	0	0.144327	1.35798	0.650021	0.00529181	0.0487356	0.0541482	0.0445795	0.0174176	0.00828128	1.62357	0.0637997	1.78818	0.297913	0.00396964	0.269092	0.00538565	0	0.988195
ENSG00000167978	4.93816	4.50868	5.52331	4.359	5.38362	5.59819	4.9634	5.45755	5.2012	4.9766	4.65845	3.82563	5.61806	3.34552	4.48242	4.73624	4.71514	5.46548	5.02761	5.75479	3.86789	5.19953	5.12637	4.52245	4.70551	5.09033	4.43157	5.324	4.65083	5.15206	5.59223	4.74506	5.49141	5.01159	5.18168	4.88582	5.51297	2.7424	5.32656	3.94677	5.5144	5.44176	5.15227	5.33093	4.88856	5.27301	5.35399	5.10606	5.78413
ENSG00000079387	1.60428	2.00829	2.791	2.0227	2.12767	2.59859	2.51109	2.94289	1.84243	2.22827	1.47611	0.97699	2.66035	0.750338	2.19974	2.59208	2.10561	2.38702	2.02948	3.12423	2.20661	2.09895	2.66542	1.87346	2.37029	2.32964	2.53523	2.20977	2.74676	2.24003	3.34671	2.05306	2.52374	2.57857	1.80971	2.24481	2.30942	0.967597	1.88596	1.30963	3.28214	2.44767	2.70867	2.1242	1.56075	2.36732	2.57633	2.10776	2.62967
ENSG00000070950	1.04661	1.10784	1.50906	1.17698	1.3492	0.924177	2.11283	1.41378	1.0654	1.33713	0.821323	0.979689	1.38244	1.24988	1.34705	1.82664	1.64819	1.57448	0.917844	1.94072	1.26463	2.20609	1.47318	1.29527	1.32382	1.29426	1.54325	1.54539	1.41959	2.3705	2.9095	1.13332	1.24039	1.29322	0.963121	1.04962	1.13422	0.473731	1.61083	0.881337	2.27888	1.52838	2.16074	1.46597	1.36563	1.81362	1.93783	1.53121	1.44992
ENSG00000116977	2.53965	2.75308	3.34934	2.83529	2.83601	3.15677	1.71405	4.65782	3.11032	2.4931	2.70736	2.07461	3.44481	1.7493	1.89063	2.56154	2.62094	2.69652	3.23918	2.82409	3.02736	2.35572	2.8504	3.23027	2.76127	2.2951	2.7594	2.54771	3.15849	2.9355	3.03547	2.20916	2.20955	2.70387	2.58566	2.02862	2.2242	1.40243	2.92343	1.83252	3.67489	2.56462	2.96683	2.33816	2.52192	2.70283	2.73499	2.55922	2.74314
ENSG00000185885	7.28088	8.67069	6.74786	7.05872	7.13071	7.15514	7.13924	6.70824	6.57547	8.27469	7.05097	7.68604	6.75849	5.44943	6.18658	5.9287	9.14215	7.20964	6.3775	6.95819	7.31349	5.67861	7.35435	7.65443	8.37971	7.76988	5.77257	7.8432	5.74989	8.44946	6.31551	6.82536	6.51901	6.88479	6.41193	4.9443	8.1765	3.5054	7.5639	8.36461	6.33381	7.9771	7.71976	6.56979	6.12521	5.46249	7.17578	9.00808	7.1724
ENSG00000120820	1.43701	1.27406	1.97998	3.40937	1.53762	2.11151	1.30163	0.859947	2.86255	1.27359	3.36635	0.637693	1.39594	1.13829	2.45356	3.58727	0.958573	0.424573	2.18773	0.968297	3.23914	0.835794	0.919428	0.717503	2.78293	2.42233	1.94072	1.78127	1.79731	1.67661	1.06981	2.59062	1.71038	3.53047	1.44653	0.855408	3.29082	0.0802856	1.13854	1.46722	1.44811	1.77565	0.945881	1.78353	0.789559	0.743228	1.49357	1.24978	1.26389
ENSG00000119669	2.96379	3.29479	5.14953	3.74707	3.64647	4.48126	3.47851	4.4028	4.0179	3.80191	3.94102	2.07292	4.31082	3.08527	4.34023	3.24324	3.29335	4.36196	3.8043	3.8387	2.98281	1.74725	3.64735	3.75121	3.62162	3.52014	4.66152	3.59262	2.9651	2.27966	4.67052	4.03862	4.48755	3.59593	3.18801	3.8934	3.99392	1.39943	3.5778	2.76502	4.30665	3.81811	4.15737	3.58329	3.67265	3.46258	3.31158	3.32666	4.00776
ENSG00000170417	0.361123	0.901586	1.80307	1.2322	0.904487	0.602318	0.610909	1.55204	0.825747	0.734217	1.49678	0.524963	1.11017	0.376955	1.265	1.63455	0.608761	1.13366	1.30732	0.96631	1.96535	1.34986	0.637973	1.42687	1.01458	2.00261	1.26476	0.655362	1.37386	0.90504	0.933568	3.62475	0.854665	0.584433	0.673792	0.923693	1.54421	0.793905	1.00968	0.30232	1.37427	1.61117	1.16053	2.10568	0.5615	1.30569	1.23195	0.415611	1.46004
ENSG00000186881	0	0	0	0	0	0	0	0	0	0	0	0	0	0	0	0.0156473	0	0.0228594	0	0	0	0	0	0	0	0	0	0	0	0	0	0	0.0218665	0	0	0	0	0	0	0	0	0	0	0	0	0	0	0	0
ENSG00000174460	0.0332651	0.00964596	0.152354	0.35369	0.0548548	0.153649	0.033781	0.031194	0.129414	0.0372335	0.240623	0.0258934	0.0135769	0	0.227645	0.104442	0	0.0391236	0.188919	0.0985684	0.234199	0	0.0323304	0.0223533	0.158877	0.0758677	0.30245	0.0277497	0.0618978	0.0609799	0.0907095	0.0620576	0.965607	0.243776	0.0350072	0.0273486	0.0477286	0.0880442	0.0461053	0.145107	0.546732	0.0631893	1.22867	0.0180162	0.013224	0.0452657	0.0179207	0.0447035	0.808949
ENSG00000173599	3.42845	3.18317	2.99761	3.17139	3.46686	3.12081	4.41358	3.34481	3.81542	4.58295	4.87344	4.13854	3.63389	2.59162	3.70097	2.70166	2.73988	3.14375	3.97436	3.47606	3.08642	1.89326	4.30545	1.40687	3.47117	2.75614	2.13982	3.502	3.89826	2.1127	3.38643	2.23668	4.67782	4.05312	3.60288	4.54929	3.44034	3.32549	2.23756	2.4841	3.45235	3.21758	3.61147	4.83961	2.05336	5.10664	4.0376	3.83922	5.26861
ENSG00000178988	4.69431	4.14261	4.66103	4.29341	5.17994	4.57755	4.81864	4.35059	4.66892	4.46578	4.8528	2.82355	4.48445	3.46922	4.11332	4.86568	4.6597	4.55064	4.84989	4.73526	5.58411	5.4054	3.99284	4.19113	4.86332	4.77039	4.27029	3.66806	4.79429	4.75241	4.75372	4.62112	4.53231	4.58928	5.01884	4.36422	4.06508	3.52591	3.78172	4.68644	4.56116	4.75137	3.96819	4.2276	4.30471	4.94244	5.06348	4.22406	3.99648
ENSG00000176165	0.015272	0.00880427	0.689554	0.604193	0	0	0	0.266359	1.1646	0	0.01082	0.0353245	0.30211	1.23524	0	0	0	0.0224419	0.296841	0	0	0.916331	0	0.576821	0	0	0.00589253	0	0.573387	0	0.00710146	0.00412706	0.0551635	0	1.91376	0.00628452	0	0.0674327	0.328345	0.0126079	0.165149	0	0.671623	0.480873	0.213683	0.641414	0	0	0.0114644
ENSG00000164934	2.86977	3.20138	3.13835	3.12983	3.56661	2.72514	2.77756	2.81333	3.26737	2.74831	2.91817	2.42615	2.59572	3.23059	2.75664	3.33737	3.29163	3.1069	3.76358	2.44517	3.05949	3.57523	3.54747	2.85467	2.60348	3.49633	3.0639	3.29098	2.53903	2.90574	2.63446	2.05866	3.43235	2.76764	2.28892	3.05164	2.19881	2.68039	2.9799	3.28967	2.97802	3.07576	3.23275	3.21134	2.21558	2.92188	2.84357	2.25921	3.13668
ENSG00000161958	0.0311402	1.16684	0.161176	0.162289	0.161021	1.13102	0.0581883	1.15873	0.705975	0.0299296	0.923203	0.0615157	0.782586	0.0994934	1.16126	1.21332	0.371712	0.175673	1.32853	0.970189	0.366322	0.405849	1.13305	1.25305	0.498014	0.497006	0.15715	1.29513	0.83213	1.31529	0.41092	0.516474	0.427742	0.0419721	2.11706	0.285291	0.601995	0.0120813	1.43587	0.102015	0.659044	1.53401	0.231004	0.752865	0.970718	1.04304	0.070539	0.53018	1.49888
ENSG00000162891	1.48198	3.47066	0.0912555	0.0766393	0.287715	0.0931087	1.16143	0.208638	2.11289	2.10551	1.04885	1.27388	0.057118	1.08877	0.675645	0.805905	0.499315	0.584008	2.9873	0.244361	1.05116	0.0650886	0.527036	0	1.52531	0.0650548	0.036389	3.00044	0.232365	0.491281	0.0220462	0.54194	1.0209	0	0.879137	0.689791	0.156959	2.08417	0.582093	1.83784	0.138718	1.10794	0.503961	2.89197	1.27256	0.24064	0.984594	0.460875	0.216397
ENSG00000163395	0.407544	0.108119	0.00867644	0.00508104	0.698014	0.159966	0.269076	0.136556	0.139818	0.111881	1.01822	0.549447	0.00751582	0.304534	0.297362	0.0037348	0.00733013	0.199196	0.121857	0.00312735	0.118443	0.0213682	0.0913648	0.012391	0.425448	0.20802	0.404639	0.102067	0.00697055	0.0889548	0.005735	1.95825	0.07152	0.0162097	0.478692	0.170051	0.16848	0.268687	0.757576	0.0477537	0.0325846	0.035248	0.33601	0.345653	0.355887	0.00844246	0.174901	0.0653792	0.279921
ENSG00000141756	2.93307	3.45251	4.72879	5.67128	3.17003	3.90772	3.49243	1.95026	5.22314	2.56083	5.49424	2.86363	3.06362	5.08392	4.99777	6.63005	1.62285	4.7274	3.98764	2.24336	4.52999	2.35642	4.18716	2.72088	4.28454	4.37354	4.58168	3.07814	5.00125	2.51949	2.13177	4.97408	5.11832	4.9244	2.12218	5.05263	5.26013	2.20435	1.46862	4.34955	3.00995	5.75146	5.62334	3.8905	1.50171	4.34547	3.36725	2.20014	6.47026
ENSG00000166881	2.47389	2.05461	3.50895	2.61851	2.34761	3.13152	2.47081	2.91261	2.20255	2.78579	1.88083	1.09735	3.09844	0.9061	2.07372	2.57824	2.42442	2.58855	2.2902	3.25747	2.07047	2.39072	3.69183	3.07823	2.73826	2.81211	3.57469	2.09542	2.99338	3.23529	3.47457	1.96471	2.97699	2.96558	2.01037	1.93778	1.86494	0.76984	2.28711	1.14937	3.77064	2.52878	3.6822	2.71151	0.906571	1.95058	3.06894	2.59415	2.72942
ENSG00000178115	0	0	0	0	0.0459565	0.0140365	0	0.0109321	0.0156208	0	0	0.0270218	0	0	0	0.0210481	0	0	0	0.00884789	0.0239335	0.0242061	0	0.0233287	0	0	0	0	0.0261719	0	0.0161987	0.0280965	0	0	0.0183795	0	0	0.0312523	0	0	0.0524203	0.025069	0.0110154	0	0	0	0.0371684	0	0
ENSG00000004660	1.35264	1.67963	3.08939	1.63838	0.856448	2.07612	0.920156	2.28875	2.04851	0.77817	1.51823	1.52486	2.49497	1.46476	1.19898	1.54904	0.879409	1.20232	1.48494	1.4033	1.00111	2.57838	1.82479	0.887002	1.28701	1.74116	2.39636	1.20985	1.12632	1.92397	2.23128	1.73323	2.18298	1.89742	1.80674	3.14006	2.03674	1.89407	1.20949	0.75531	2.09872	0.681479	1.92254	1.28615	0.95257	2.01304	1.32335	1.12702	1.98018
ENSG00000134717	3.08565	2.95653	2.60011	2.92224	3.45737	2.62597	3.13461	3.78713	3.22054	3.23933	3.29316	2.55029	2.70965	2.49864	2.20006	3.09826	2.98228	3.39082	3.52188	3.63072	3.54586	3.60857	2.9918	2.69303	2.99376	3.04777	2.93861	2.91426	3.3239	3.26958	3.40443	3.15115	3.31535	3.47283	2.84279	3.51198	3.40297	2.77071	3.40402	4.21539	2.9138	3.86476	2.69672	3.00953	2.85997	3.33519	3.0479	2.61096	3.1523
ENSG00000172247	0.156616	0.0758285	0.0860914	0.0722818	0	0.0357815	0.186051	0.108555	0.355713	0.0374378	0.151356	0.226467	0.0713621	0.145512	0	0	0	0.0393382	0.109671	0.0113531	0.0154139	2.08328	0	0.0150232	0.192926	0.0207385	0.0842504	0	0.0335255	0.379625	2.47335	0.171565	0.0863437	0	0.0695605	0.054484	0.100515	0.0789475	0	0.0901564	0.0505241	0.073855	0.247346	0.0940904	0.0351904	0.0896347	0	0.0478955	0.066111
ENSG00000272442	0.0282171	0.00613333	0.047241	0.017449	0.0693222	0.0339192	0.00721739	0.0395063	0.046996	0.0296356	0.0225002	0.0164979	0.0922779	0	0	0.0339902	0.0498203	0.00628285	0.0529883	0.0633733	0.0362422	0.0864516	0.0206158	0.00713555	0.0437724	0.0581759	0.0163451	0.0132839	0.0080107	0.0313032	0.0391029	0	0.00600847	0.022315	0.0333671	0.0346484	0.0244461	0	0.0511502	0.0262008	0.0942744	0.0254132	0.0332463	0.0341329	0.0167756	0	0.0888238	0.0114878	0.00798868
ENSG00000177694	0.0735435	0.370444	0.687532	0.703698	0.358724	0.357447	0.0550114	0.731008	0.61545	0.0665098	0.15184	0.0792245	0.538982	0.0324176	0.121607	0.0566257	0.0451187	0.0573995	0.364592	1.51257	0.109508	0.60767	0.0195347	1.28896	0.150325	0.148049	0.394999	0.0407872	0.298823	0.332549	0.168906	0.27518	0.22027	0.444026	0.0983076	0.210365	0.341511	0.065513	0.0209832	0.0925875	0.682341	0.0520351	0.779587	0.212557	0.0764011	0.0445675	0.127337	0.0612502	0.647631
ENSG00000112305	1.57943	2.58228	2.784	1.9101	1.71437	1.19246	1.65967	2.27385	1.80702	2.13842	1.707	2.29379	2.09591	2.12191	2.37706	1.67985	1.99053	2.18303	2.0326	2.32096	2.03308	1.34374	1.9054	2.07407	2.25906	1.54711	2.02625	2.35566	2.87423	1.99668	1.65069	2.19813	2.25616	2.18273	2.16668	1.71278	2.44651	2.63002	1.8352	1.46671	2.80452	2.05024	2.52385	1.87768	1.9088	1.91725	2.17152	2.24466	2.22508
ENSG00000163393	1.13084	0.940468	0.881624	0.403927	2.21822	1.16838	1.8966	1.85601	1.28281	0.671226	1.89929	0.573982	0.749859	0.331832	0.729742	1.52175	1.34118	1.31568	1.03293	0.778581	1.68207	0.371614	0.493282	0.431775	0.92584	1.72802	0.458805	1.13849	1.079	1.19908	1.29008	0.704889	1.20122	1.09991	1.33466	0.787528	0.696973	0.957387	1.91282	0.599343	0.761137	1.57738	0.714294	1.39307	0.803518	0.626862	1.83439	1.09112	0.772073
ENSG00000115718	0.281581	0.888934	0.324141	0.425093	0.921489	1.78459	0.451225	0.0643371	2.27827	0.48879	1.17728	1.38027	0.738055	1.09847	1.54812	2.00153	0.275312	0.338274	1.24463	0.436189	1.81626	0.461314	1.42329	0.511831	0.333709	2.23808	0.743129	0.241647	0.82237	0.904957	0.133185	0.809306	0.429428	0.568375	0.813708	0.269451	1.63757	1.06851	0.550511	2.88408	1.0604	1.36535	0.298385	1.0712	0.178547	0.0405427	2.46345	0.806163	1.5476
ENSG00000181958	0	0	0	0	0	0	0	0	0	0	0	0	0	0	0	0	0	0	0	0	0	0	0	0	0	0	0.0276307	0	0	0	0	0	0	0	0	0	0	0	0	0	0	0	0	0	0	0	0	0	0
ENSG00000114767	3.79529	3.72215	3.77314	4.25925	4.19403	3.28567	5.08384	3.52829	3.80312	3.97458	3.90098	4.57834	4.32259	5.59296	3.72404	4.13413	4.63106	4.59997	3.68459	3.21039	3.41897	5.43549	3.88534	4.11941	4.02744	4.028	4.33188	4.44301	3.58437	4.31278	3.7093	3.587	4.26173	4.16188	3.6291	3.82682	3.95372	4.54785	3.80428	5.29737	3.98372	4.11137	4.10717	4.18004	3.88116	5.1413	4.54453	4.42108	3.94382
ENSG00000108468	4.64739	4.02733	5.76998	5.21415	4.37046	4.15313	4.89803	4.49551	4.52722	4.59201	4.72507	3.15041	4.83311	2.98841	4.65471	4.68093	4.3329	4.23119	4.75756	4.58244	3.947	4.59364	4.73185	4.37573	4.39688	4.74046	6.0655	4.21946	5.03155	4.66037	4.57104	4.2185	5.14798	4.98305	4.20411	5.28566	4.72264	2.31597	3.7439	3.51538	5.84071	4.06331	5.03156	4.48168	3.18149	5.10678	5.1493	3.84033	6.35838
ENSG00000106397	3.21937	3.56161	3.87365	4.63471	3.38285	2.96162	3.9805	4.09374	4.06138	3.38892	4.60098	4.35755	3.60486	2.48563	3.50916	5.12844	3.97394	3.19783	4.44509	3.62016	3.20326	2.13278	4.27569	4.09313	4.21622	4.73201	4.74669	3.43889	2.71069	4.97906	2.7887	3.82741	4.52216	4.40964	2.93781	3.02053	3.77534	1.72888	2.31878	3.78763	3.13891	3.95671	3.77788	4.83795	1.97079	2.67197	4.21599	3.50845	4.87479
ENSG00000143891	0.884058	1.82267	2.14271	3.21907	1.10207	2.44579	0.869675	3.82208	2.91724	1.29145	2.26103	2.08537	2.17013	2.23105	1.75677	2.12994	2.99421	1.44073	1.86079	2.40397	2.13177	0.743222	2.43232	3.0243	2.9234	2.62384	1.16874	1.16503	2.56942	2.12975	3.60163	2.43388	2.08306	3.08037	0.44716	1.18279	2.174	1.63851	1.49453	2.73415	2.68269	1.91121	2.27483	1.3604	1.24463	0.798363	1.84345	2.38204	0.758874
ENSG00000129351	4.70383	4.02228	5.41994	4.40666	4.65661	4.47816	4.96201	5.27966	4.71982	4.48887	4.24667	3.88013	4.97804	4.24123	4.5526	4.64301	4.4602	5.26794	4.44537	5.00736	3.74668	5.39906	4.29377	4.46507	4.4299	4.66878	4.43877	4.44795	4.45148	5.89703	5.32913	4.2841	4.8443	4.66019	4.6654	4.6952	4.65862	3.63104	4.68399	4.47905	5.5908	4.36712	5.11849	4.93998	4.43244	5.02293	4.63387	4.48452	4.94443
ENSG00000126003	3.75811	2.30768	4.39726	3.16006	2.37965	3.22496	2.71549	4.04387	2.71149	2.41409	2.56089	1.75079	3.49418	1.53015	2.84332	3.78132	2.67887	4.04265	2.2078	3.07736	2.30398	3.16663	3.13782	3.45088	3.00336	3.25766	3.74992	3.10791	4.71493	2.94665	3.28241	2.41853	3.75982	3.67986	3.24437	3.08854	4.35694	1.03849	2.56351	1.54894	4.33732	4.83078	3.18664	2.93338	3.0586	4.05249	3.51177	3.29345	4.37618
ENSG00000110931	3.0597	2.65168	3.50311	3.14738	3.08614	3.05066	3.20609	3.56011	3.58448	3.53466	2.9086	2.73053	3.62137	2.84303	3.08362	3.45652	3.14264	3.45841	3.32567	3.16023	3.01691	3.14844	3.14872	3.17261	3.47925	3.4636	3.38993	3.37597	3.41913	3.47652	3.42646	2.90495	3.99558	3.5016	2.5299	3.14835	3.39406	2.60986	3.07633	2.80623	3.82145	3.1668	3.45769	3.46776	2.51943	3.30221	3.19206	3.40838	3.89809
ENSG00000040933	0.723455	1.12906	3.34219	1.44342	1.39432	1.29634	0.997616	1.52348	1.66846	1.57874	1.38367	0.551599	1.96295	0.918776	1.58079	1.82325	1.67051	1.4002	1.363	1.33188	1.61235	1.44027	1.36503	1.31074	1.97021	1.56131	1.90981	1.95509	1.50403	1.21813	2.25436	1.53258	2.23541	2.13304	1.03802	0.913716	1.36211	0.499202	1.62333	0.949262	2.33689	1.41389	2.76484	1.43678	1.33192	2.27562	1.65271	1.81405	1.28032
ENSG00000177692	0.32354	0.537932	0.332186	0.341117	0.524638	0.116512	0.261349	0.117787	0.791204	0.269586	0.493176	0.197097	0.449075	0.649592	0.593962	0.446196	0.390194	0.103087	0.673764	0.704688	0.669057	0.31899	0.471692	0.364573	0.253014	0.357578	0.446324	0.403477	0.495162	0.551216	0.523192	0.537211	0.443649	0.400159	0.447838	0.330929	0.180053	0.441434	0.715156	0.682369	0.65353	0.258262	0.252442	0.197515	0.549072	0.228678	0.344177	0.390583	0.277423
ENSG00000137834	0.34877	0.195435	1.76048	1.12638	0.485267	0.918826	0.108606	1.0421	0.528914	0.177756	0.47187	0.104999	0.647633	0.174904	1.2165	0.404877	0.432484	0.911452	0.755956	0.858917	0.222786	0.446935	0.191195	0.679968	0.67493	0.561195	1.0253	0.466781	0.831024	0.580084	0.708432	1.18445	0.777345	0.718867	0.119544	0.696673	0.488643	0.0879362	0.18853	0.208375	1.76693	0.221849	0.699166	0.550808	0.141645	0.862325	0.424315	0.57086	0.119774
ENSG00000129221	0.00626631	0	0.00528219	0	0	0.0225153	0.00636442	0.0576786	0.0250484	0.0105198	0	0.0289619	0.00761677	0	0.00626151	0.0150809	0.0331315	0.0220339	0	0.00475152	0.0383118	0	0.0181893	0.00629223	0.0155871	0	0.00722739	0.00391619	0.048738	0	0.0259719	0.0251376	0.0158363	0	0	0.0153749	0.0480914	0.00844634	0.0130552	0.0154559	0.0283476	0.0357169	0.102972	0	0	0.0128148	0	0.0251977	0.00704477
ENSG00000189152	0.0122875	0.010608	0.0103612	0.10269	0	0	0.0124795	0.0455276	0.0164557	0.0205991	0.064027	0	0.029705	0	0	0.0726147	0	0.0108662	0.0116398	0.018584	0	0.0751738	0	0	0.0153157	0.0505222	0.0281974	0.00768523	0	0.0136397	0	0.0489868	0.0103923	0	0.0193607	0.0151072	0	0	0	0.0450889	0.0139953	0.00885518	0.0231176	0.0393463	0	0	0.0391393	0.0198422	0.0138104
ENSG00000110881	0.63183	0.521112	1.46103	0.817762	0.719966	0.767141	0.351638	0.327277	0.539571	0.843546	0.575492	0.522088	1.52789	0.452969	0.990289	0.815469	0.118946	0.921473	0.520706	0.283789	0.258222	0.481825	0.759009	1.14782	0.341974	1.30811	1.54743	0.665737	0.775346	0.7944	1.0118	0.492842	1.70535	0.901023	0.357699	0.416224	0.438604	0.687899	1.3077	0.61043	1.67755	0.432866	1.33971	1.0956	0.814016	0.562217	0.684134	0.809695	3.09042
ENSG00000205439	0	0	0	0	0	0	0	0	0	0	0	0.0906541	0	0	0	0	0	0.0693182	0	0	0.0804932	0	0	0	0	0	0	0	0	0	0	0	0	0	0	0	0	0	0	0	0	0	0.479604	0	0	0	0	0	0
ENSG00000164051	3.04531	2.92745	3.82699	3.62458	2.81736	3.17022	4.323	3.41026	2.82994	3.00663	2.5947	2.89811	3.42637	3.92656	3.05935	3.28326	3.69447	3.25461	2.74683	2.03313	2.71258	4.3736	2.60834	3.76451	2.73119	2.88323	3.21662	3.2485	3.07493	3.59347	2.92754	2.3367	3.35369	3.5654	3.26055	3.20895	2.99434	2.13052	3.73855	2.87058	3.46256	3.19289	4.25283	2.66965	3.77265	4.1445	2.97055	3.96202	3.17977
ENSG00000025039	1.40887	1.25513	2.39176	2.17725	0.505232	2.22225	0.293712	1.51378	1.53552	2.21583	2.00041	1.3524	2.66074	1.36482	1.43578	0.359263	1.51688	0.824438	1.76558	1.84892	1.16151	0.875059	1.32496	2.93779	1.34027	2.01098	2.64522	0.745881	2.21071	1.12263	2.37874	4.56416	2.35916	2.93048	0.405032	1.34031	1.54911	1.70715	1.39614	2.47102	2.13582	1.40297	3.14365	1.60913	0.304423	1.63691	0.716562	1.03514	2.48635
ENSG00000148343	2.12004	1.405	2.63447	1.7311	2.85593	2.11279	2.1152	2.49243	2.51639	2.12117	1.92079	2.3221	2.43876	1.77856	1.63288	1.73723	1.75062	2.05418	2.00393	2.6555	1.91276	3.07457	1.94215	1.58416	2.38432	2.55723	2.5142	1.85029	1.31065	2.29114	2.87591	1.89906	2.43774	2.11948	2.03711	2.51142	1.03748	2.50262	2.25769	2.28248	1.90368	2.21708	2.58509	2.18586	1.63197	2.60752	2.57217	2.34164	2.39652
ENSG00000164053	0.0297165	0.012895	0.0558321	0.0365285	0.0442121	0.0445109	0.102971	0.0952575	0.106692	0.012565	0.0236983	0.0173783	0.079899	0	0.0296939	0.0224742	0.0132916	0.0774961	0.0420351	0.0392811	0.00771368	0.0909498	0.0288805	0.0224365	0.0551283	0.0207014	0.0510478	0.0415801	0.0499121	0.0410896	0.0512847	0.0359202	0.00633036	0.0351129	0.0694383	0.0092082	0.0193531	0	0.0837358	0	0.0504348	0.0373336	0.0624185	0.0359428	0.0609235	0.0749454	0.0357535	0.0241034	0.0251031
ENSG00000164687	9.58561	9.64435	5.24914	5.14656	9.24326	8.46741	7.38127	4.59532	8.36158	9.60315	8.4191	8.41862	5.58415	9.75928	8.81749	3.9641	7.32341	8.93479	9.68273	8.20461	9.36367	8.51559	7.50811	5.98073	6.21063	8.3322	5.76071	7.37729	6.58928	10.0873	5.36893	5.22448	6.62583	6.38818	9.18829	7.11269	6.01741	10.6295	9.19164	8.07846	5.24816	7.50137	4.20629	7.45932	9.30236	7.92013	8.29591	8.47708	4.51914
ENSG00000197956	9.79567	9.66128	9.1995	9.86835	9.89374	9.77343	10.7939	11.1487	9.74486	8.74037	9.84613	11.7319	10.2041	9.79525	8.39991	9.58591	9.77409	8.17979	9.58048	7.24843	10.5081	10.4754	9.84507	10.1774	9.45513	8.33166	10.0469	9.79786	9.08479	9.94854	8.94315	9.21515	9.99725	9.71433	10.1798	10.5068	9.65123	11.059	9.75067	9.46339	9.1759	7.59512	9.76463	9.25254	9.61761	10.5869	9.54484	9.70518	9.25429
ENSG00000186980	0	0	0	0	0	0	0	0	0	0	0	0	0	0	0	0	0	0	0	0	0	0	0	0	0	0	0	0	0	0	0	0	0	0	0	0	0	0	0	0	0	0	0	0	0	0	0	0	0
ENSG00000159173	0.282991	0.280756	1.08207	0.338207	0.563688	0.829869	0.723321	1.05071	0.490623	0.675293	4.46081	4.98885	0.771056	1.18103	3.04234	2.525	0.278898	0.879365	0.266711	0.434237	4.96459	0.230208	2.91727	0.926415	3.87536	5.70628	4.68581	0.203093	0.439533	0.579327	0.854531	7.76799	1.59395	0.691528	1.08267	3.87564	3.14622	0.0743248	3.15781	0.608644	0.354463	3.9895	1.69019	5.097	0.539284	0.626141	3.02602	0.519032	3.71516
ENSG00000079435	0.321813	0.476105	1.4605	0.8219	0.497616	0.643265	0.402184	2.88888	1.1212	0.0515987	0.80697	0.618712	1.83877	0.535499	0.474612	0.986459	0.671513	0.933603	1.05386	2.12133	0.82298	2.45229	0.567897	1.10498	0.809424	0.728705	0.167381	0.77884	0.581075	1.41223	1.85179	2.27737	1.53793	1.16088	0.905849	1.17036	1.54456	0.49007	0.585918	0.649735	0.6434	0.512898	1.06903	0.680899	1.42916	0.841752	0.807274	0.8139	1.01644
ENSG00000146955	0.024885	0.182825	0.910478	0.201714	0.50209	0.646912	0.14539	0.134644	0.0658044	0.353764	0.0263913	0	0.59244	0	0.143147	0.417927	0.609913	0.187015	0.0467782	0.38214	0.498079	0	1.12651	0.295275	0.850591	0.254981	0.189687	0.217812	0.43632	0.530481	0.725489	0.309017	0.234458	0.22005	0.114292	0.0604957	0.0637252	0	0.149261	0	0.726254	0.293282	1.05955	0.116842	0.0294254	0.0505526	0.588279	0.578179	0.13465
ENSG00000002745	0.0228408	0.0131823	1.1846	2.3439	0.037753	0.489173	0.133893	1.373	0.0703047	0.117643	0.168866	0.017765	0.081638	0.00973266	0.511186	0.0722628	0.0270487	0.135845	0.158169	0.293672	1.85159	0.449855	0.325665	0.260184	0.196631	0.0211615	0.151171	0.0517735	1.46022	0.0169454	0	0.0487475	0.379875	0.244541	0.488818	0.100319	0.186593	0	0.0472946	0.018865	0.540689	0.070081	0.906087	0.118986	0.294893	0.896337	0.060402	0.0368016	0.370842
ENSG00000151239	3.76829	4.41865	5.06265	4.11511	4.38393	4.80289	4.29804	4.63366	4.00041	4.25055	3.72643	1.05584	4.18712	1.7084	5.06502	4.74296	4.91846	4.84831	4.05647	4.82045	4.63789	2.96438	4.12059	4.0762	3.95514	3.64608	4.69402	5.09272	5.29811	4.32191	4.10596	3.11078	4.56343	4.79784	4.56398	4.47995	4.78164	1.80954	4.86768	3.15609	4.87856	4.25	4.78646	4.0407	4.99214	4.95935	4.51415	4.30582	4.96428
ENSG00000253250	0.183737	0.202475	0.697161	0.895824	0.158409	3.34168	0.109468	0.218642	1.01069	0.0463119	1.03563	0.0637706	0.305629	2.5879	0.607373	0.344066	0.0489573	0.207083	1.32588	0.216306	0.730981	0	0.337911	0.831344	0.472348	0.461829	0.682065	0.298904	0.285459	1.27631	0.147909	1.84217	0.426955	1.05097	0.0435509	0.0998161	0.697024	0	0.139207	1.13768	0.437021	1.66847	1.98175	0.460806	0.186345	0.110417	0.129053	0.305225	0.177493
ENSG00000167822	0	0	0	0	0	0	0.0265664	0	0	0	0	0.0602128	0	0	0	0	0	0	0	0	0	0	0	0	0	0	0	0	0	0	0	0	0	0	0	0	0	0	0	0	0	0	0	0	0	0	0	0	0
ENSG00000180628	1.78909	2.00719	2.70188	3.12428	2.3898	2.77629	2.35057	3.19329	2.49955	2.1325	1.60135	1.4498	2.42172	0.852189	2.10758	2.28895	2.78886	2.2831	2.0193	2.58074	3.05186	2.21931	2.81194	2.31925	3.08208	2.35746	2.66437	2.53031	3.28173	2.66849	3.36324	2.79461	3.08268	2.9745	1.6034	2.35614	3.08419	1.03815	2.07453	1.74024	2.79012	1.95558	3.07964	2.11033	1.86651	3.07425	2.59598	2.8319	1.59553
ENSG00000206190	0.517158	0.709644	1.15073	1.59365	0.259923	1.11124	0.313877	0.327869	1.32163	0.2851	1.65209	0.305018	0.815656	0.330272	0.894948	0.516771	0.46255	0.198731	0.73994	0.409586	0.949339	0.275836	0.320223	0.22888	1.07856	1.44006	1.14808	0.429225	0.274235	1.50685	0.738633	1.05624	1.18002	1.53519	0.221781	0.414208	1.94566	0.372902	0.14194	0.689308	1.78547	0.576747	0.5495	0.757131	0.1473	0.155957	0.645008	0.651789	0.814387
ENSG00000169906	0	0	0	0	0	0	0	0.0506405	0.0719412	0	0	0	0	0	0	0	0	0.0940936	0	0	0	0	0	0	0	0	0	0	0	0	0	0	0	0	0	0	0	0	0	0	0	0	0.0510213	0	0	0	0	0	0
ENSG00000137648	3.14286	3.30333	4.82463	3.43631	2.49422	5.56498	2.34146	4.7614	3.59009	1.64135	2.2709	2.52404	5.44607	3.52938	3.5017	3.50566	4.06864	3.74192	4.37969	4.50153	5.15458	3.89468	3.91442	4.18998	2.2757	1.32561	4.31477	3.6299	5.45816	2.32718	4.59669	0.940766	5.97511	5.07704	2.88284	4.06453	4.26865	2.26546	3.1264	2.06643	4.94162	1.97434	4.91168	3.60574	3.9999	5.29289	3.06948	4.52123	4.53366
ENSG00000177947	0	0	0.00676486	0.0196947	0.0159548	0.00965971	0	0	0.0214241	0	0.00851317	0.0370066	0.00975253	0	0	0	0	0	0	0	0	0	0	0.00805762	0	0	0	0	0	0	0.0111503	0	0.0135387	0.0126457	0.0126544	0	0	0	0	0	0.00914157	0	0	0	0.00949869	0	0	0	0.0268944
ENSG00000148057	0.457267	0.821552	1.56859	1.66891	1.1994	1.20978	0.133729	2.62535	1.04576	0.882876	0.512134	0.884697	1.12069	1.09198	0.496588	0.947959	0.887959	0.781096	0.860031	1.32619	1.14531	2.512	0.647764	0.956808	1.33074	0.856122	0.412493	0.876554	0.994249	2.39466	1.57627	0.94034	1.09734	1.52186	1.07217	1.56818	1.03616	0.485293	1.23752	0.879687	1.50124	0.664544	1.66724	0.850922	0.757733	1.30451	1.25309	1.08574	0.483235
ENSG00000171812	1.1543	2.1207	1.94423	3.86991	2.12505	4.17679	0.4258	0.92184	4.58946	1.79098	4.16414	1.21105	2.20024	2.08492	2.74517	2.26764	2.13415	1.76413	3.65315	2.28079	3.36303	0.762844	1.7958	1.58636	3.27374	3.93017	2.91452	1.86469	3.734	3.66052	2.70335	2.76648	1.96843	4.2286	1.73771	0.994191	5.22359	0.849337	1.99649	2.69243	1.4429	2.15522	1.31039	2.60662	2.37271	0.644679	2.78651	2.02293	1.18787
ENSG00000173482	0.892824	1.17878	1.52066	2.15169	1.48045	1.43912	0.708016	0.929549	1.8985	1.12907	1.96222	0.598579	1.80447	0.449603	1.75451	1.36253	0.685099	0.919957	1.98263	1.06822	1.73117	0.862445	0.560678	0.383365	2.11935	1.93377	1.66409	1.45458	1.03503	0.527787	0.859231	3.016	1.74044	2.08264	0.601728	0.804131	1.83761	0.3307	0.755231	0.632836	2.0019	1.33401	1.89013	2.10688	0.577059	0.738115	1.39709	0.979383	1.07677
ENSG00000102119	4.71878	5.12074	4.65978	4.51543	5.07729	4.3947	4.93846	5.13945	5.16576	4.60986	4.69706	6.1931	4.94993	4.99908	4.79778	5.08514	4.50898	4.82012	4.69277	4.44882	4.56064	6.8806	5.34657	6.04683	4.47974	4.43042	6.11197	4.06279	4.61709	5.00961	5.94455	4.86881	5.13005	4.82749	4.71605	4.97291	4.73958	3.97796	4.30763	6.27403	5.08831	4.87058	5.34664	5.5173	5.16362	4.90553	5.14067	4.38514	5.21623
ENSG00000182180	4.53189	4.58055	4.61751	4.72773	4.82115	5.01957	5.66094	5.03919	4.83174	4.70588	3.84859	5.3747	4.75742	5.39079	4.29314	4.32114	4.91708	5.25509	4.00102	4.94762	4.88668	5.36396	5.1081	4.73017	5.00532	4.99413	4.95114	5.36387	5.2042	4.8063	5.51416	5.01397	4.33406	4.86514	4.53493	5.12678	5.08488	4.15784	4.90454	5.39104	5.57007	4.78793	4.77783	4.76707	4.60556	5.46605	4.81747	4.78303	4.32523
ENSG00000164434	0	0.0467254	0.0531216	0.170383	0.0361238	0.0219311	0	0.625009	0.0719926	0.0153414	0.00970127	0.142314	0.0221409	0.0459546	0	0.0110304	0	0.0711901	0.0427992	0.0478637	0.0465046	0.0189964	0.026494	0.22158	0.0779789	0	0.0621466	0.0339677	0.895638	0.0302443	0.0252987	0.0147413	0.0532791	0	0	0.0661961	0	0	0.0284535	0.140477	0.010417	0.039085	0.148053	0.0581187	0.0108238	0	0.029197	0	0.605956
ENSG00000139988	2.38981	4.23654	2.41596	0.184062	0.750683	5.37906	0.238146	0.41269	1.4686	0.152387	3.39873	0.290352	1.37004	2.35418	5.36838	0.0990862	2.10893	2.71889	2.20539	0.216383	0.783007	0.28079	2.27968	0.0626177	1.16364	0.699362	3.34444	2.46932	2.53782	0.238649	0.206177	0.251289	0.778747	1.00796	3.28471	4.95888	1.81143	1.80849	4.27259	0.348538	1.85852	2.48135	0.452554	0.736709	2.82328	2.68882	2.42742	2.08488	0.0925272
ENSG00000256537	2.28412	1.96482	2.77799	2.99589	3.49464	2.25093	2.42738	2.92586	2.82677	2.54263	2.54436	2.98708	2.33598	3.44581	2.56574	2.25072	2.24759	3.12065	2.42997	2.62373	2.45987	2.72963	2.37836	3.65935	2.23624	2.34533	3.52808	1.68108	2.80517	2.37717	2.72762	3.06306	2.65629	3.25687	2.47137	2.2165	2.6531	4.07941	2.09573	3.56575	3.21971	3.24719	3.15576	2.60405	1.50482	2.49261	2.22877	1.86402	2.59115
ENSG00000188015	3.10916	2.21284	2.20545	1.66489	3.56414	1.59108	4.06177	2.91704	4.16042	2.64444	3.49229	3.73917	1.86815	3.94701	1.77143	2.46658	2.80276	1.03108	2.40147	2.8134	2.93788	4.41493	1.9482	1.07901	2.19563	2.61975	1.36275	1.98976	1.52825	4.61592	2.23701	1.9759	2.07334	2.28406	2.13271	4.03774	2.40765	2.38922	4.04396	3.9004	1.15142	2.22866	1.69901	3.05988	2.59306	2.97957	3.11761	2.27434	1.82081
ENSG00000184058	2.24826	2.43092	2.59313	2.79291	2.96186	2.48434	2.52036	2.57218	5.57656	3.12925	2.28539	1.54521	3.16815	1.83584	4.06023	1.33924	2.86834	2.43147	3.65615	2.02315	1.22935	0.956934	1.61281	2.35485	2.38127	2.32505	3.6682	2.32996	1.1247	0.765379	0.39022	2.74114	2.09603	1.9742	1.14715	2.75405	2.09177	2.49696	2.84622	3.65559	2.75023	1.81619	1.12165	2.90295	1.1785	2.80952	2.73277	2.64937	0.526865
ENSG00000187848	0.0126541	0	0.161924	0.134476	0.0251203	0	0	0.136275	0.033695	0	0.0134235	0.113806	0.0456388	0.0160835	0.0126445	0	0.0662835	0.0333144	0.0356668	0.0096003	0.0130371	0.077367	0.0122961	0.0127063	0.0620797	0.0175455	0.0574949	0	0.0142613	0.0279574	0.069041	0.0102279	0.0733026	0.0199232	0	0	0	0	0.361949	0.0156393	0.0979891	0	0.16964	0	0.0149745	0	0.0402958	0.0305413	0.0283056
ENSG00000186625	3.18618	2.79358	3.36063	3.07025	3.38202	2.3761	3.56465	3.78625	3.29273	3.50046	3.4668	3.25177	2.87278	4.37235	3.19351	2.61803	3.25047	3.54787	3.16431	3.14923	3.6519	3.00333	3.55892	2.8472	3.29777	2.78833	2.91919	3.15359	3.54684	3.74451	3.18128	2.96085	2.95231	3.5441	3.07983	3.53719	3.36261	4.05598	3.22616	3.58609	3.79162	3.13146	3.53988	3.34293	2.4322	3.93215	3.14031	2.98066	3.46916
ENSG00000166387	1.9002	2.35203	3.36442	2.5323	1.35555	2.26817	0.811301	2.33185	2.46815	0.611324	1.32442	0.766898	2.38775	0.913554	2.13073	0.913733	2.94362	2.27757	1.45185	1.66047	1.81642	1.83661	1.54111	1.27607	1.82596	0.9025	2.15797	2.82213	2.64752	2.48471	2.14318	1.47132	2.48804	2.16045	1.67009	3.00342	2.27428	1.35866	2.19662	0.41655	2.31605	1.30358	3.1644	1.11702	2.75365	2.16315	1.53712	2.45181	1.92103
ENSG00000158769	5.26809	4.81659	5.57755	5.49117	6.08147	5.24817	5.42398	6.97798	5.67632	5.55192	5.54633	5.17009	5.6058	4.96367	4.67847	5.40069	5.26601	5.85046	5.78221	6.0484	5.3171	6.59594	5.3583	6.69059	4.86017	4.83517	5.59419	4.8975	5.49499	5.97959	5.62664	3.74646	5.72565	5.65081	5.12402	5.78427	5.22765	5.40546	4.99035	5.48142	6.18319	5.45915	7.9929	5.50933	5.46506	6.72506	5.48433	5.19047	6.36071
ENSG00000101890	0	0	0	0.0246947	0	0.00809316	0	0	0	0	0.00713211	0.0310526	0	0	0	0.00406083	0	0	0.00636748	0	0.00692635	0	0	0	0	0	0.0154652	0	0	0	0.0093428	0	0.0169851	0.0211161	0	0	0	0	0	0.00831241	0.0152772	0	0.0126691	0	0	0	0	0	0
ENSG00000182264	0.146224	0.0250719	0.358957	0.0268369	0.112391	0.0348809	0	0.420019	0.0577956	0.00614714	0.112161	0.221117	0.11966	0.124979	0.0714273	0.0349539	0.076171	0.129986	0.0743918	0.127487	0.0298917	0.131315	0.0212031	0.0073398	0	0.0202138	0.105928	0.270436	0.0959026	0.0161856	0.310616	0.052303	0.249629	0.143038	0.0678294	0.255545	0.0498524	0.00985132	0.588667	0.0533973	0.0732714	0.026136	0.343225	0.135552	0.156137	0.142888	0.080193	0.0751298	0.249138
ENSG00000119139	4.29418	4.04486	4.08454	2.38121	3.30389	4.07749	4.60804	5.07794	2.68463	3.92815	3.50837	2.77396	4.17296	1.97033	3.39905	3.69651	4.11861	4.39257	2.36294	5.2625	3.65323	4.11906	4.06258	2.83477	3.69661	3.48452	2.71328	4.80865	4.2204	4.06331	4.61114	3.43295	3.99678	3.81395	4.50381	3.48625	3.65729	1.86355	4.55461	1.9446	3.79069	4.12028	3.91253	3.62203	4.30479	5.25768	3.99034	5.00288	2.83394
ENSG00000118777	0.246176	0.549004	0.356598	1.88162	0.192416	0.436579	1.53458	0.0799737	0.651727	0.23199	0.632742	0.191156	0.827424	0.274345	0.747867	0.409502	0.412496	0.318094	0.330604	0.699274	0.63165	0.0836102	0.385068	0.668331	0.893122	1.06235	1.1545	0.581128	0.57748	0.207858	0.398945	0.704807	0.738419	0.840504	0.565971	0.281867	0.416135	0	0.143536	0.0867488	0.920695	0.226488	1.01699	0.372868	0.156286	0.0922138	0.528974	0.350691	0.772443
ENSG00000113389	0.020151	1.14836	1.73574	2.09903	0.891671	0.427804	0.590125	0.544009	2.31692	0.283644	0.191292	0.239018	1.6311	0.167427	0.549727	0.0990838	0.162021	2.22171	0.93797	1.77391	0.202094	0.861774	0.0340965	2.88785	0.480146	0.413711	3.61474	0.898444	0.42332	1.26538	2.16438	0.471146	1.84823	2.61424	0.272958	1.83353	0.620113	0.0895455	0.298047	0.317073	0.66639	0.238432	1.582	1.0346	0.632009	0.175984	0.0520593	0.285924	2.83813
ENSG00000172399	0	0.0247297	0.0321205	0.0235535	0.00957443	0	0.0386283	0.307828	0.0128663	0	1.29866	0.879796	0.0116712	0	0.956854	0.21567	0	0.0253287	0.00909759	0.0145327	1.7722	0.019948	1.03655	0.00964397	2.6593	3.15296	2.36778	0.0356601	0.0215706	0	0.0265632	6.00409	0.402495	0.0151306	0.0596332	2.06108	0.740179	0	0.96237	0.0353298	0.0538913	1.60793	0.463012	2.82767	0.0113676	0	1.13922	0	0.886563
ENSG00000162456	0	0	0	0	0	0	0.00901739	0.00832136	0	0	0	0	0	0	0	0.0371413	0	0	0	0	0	0.0184456	0	0	0.0110698	0	0	0	0	0	0	0	0	0	0.0139988	0	0.00768508	0	0	0	0.0101141	0	0	0	0	0	0	0	0
ENSG00000139514	3.97072	4.81161	4.39211	3.87544	5.88403	5.31691	5.58864	4.47438	3.56261	6.12695	3.26842	2.16768	4.14466	3.61089	5.93129	5.30947	4.56378	5.10573	4.8441	6.05114	3.6433	3.44994	5.31124	4.95355	5.09678	4.35474	5.10194	6.31667	5.0621	4.01184	4.92837	3.76987	4.76495	3.75538	4.97587	4.69736	3.74582	3.43312	4.59993	2.95038	4.23741	5.46622	4.64558	4.76892	4.46156	4.29312	5.94622	5.91454	5.33079
ENSG00000126787	3.28699	3.10769	4.52078	3.0435	2.63368	3.58932	4.13237	3.62876	2.5863	3.98445	1.98602	1.82137	2.83435	3.61689	2.87551	3.32253	3.29558	3.8926	2.76589	4.02941	2.43333	3.3123	3.48464	3.19318	2.94802	3.37967	3.20466	2.88371	3.48323	4.09296	4.25417	2.03767	3.30275	2.90035	3.62551	3.73914	2.5322	1.64378	2.89833	2.4809	3.38847	3.4338	3.36137	3.9337	2.10614	2.96467	3.2597	2.99795	3.05282
ENSG00000112319	0.0331038	0.0309654	0.0417177	0.086737	0.0302802	0.179888	0.0224983	1.08169	0.132225	0.016328	0.331824	0.0573428	0.225718	0.0350802	0.153287	0.039863	0.0535981	0.329353	0.0771836	0.0355119	0.288334	0.321901	0.0791272	0.882014	0.170567	0.385442	0.220507	0.0344368	0.0646126	0.00618486	0.0115986	1.54972	0.141427	0.238947	0.00878856	0.128078	0.303691	0.0733856	0.0571289	0.0674471	0.130652	0.603429	0.959212	0.453	0.0677853	0.187465	0.0657679	0.0334936	0.128994
ENSG00000132182	1.32983	1.08246	2.76759	3.68858	1.89285	2.48516	0.265933	2.45571	3.00925	0.846733	1.25171	1.24056	4.44032	1.13431	1.27967	3.81454	2.31035	2.31076	2.91449	3.76195	1.87643	4.22761	3.5662	4.7077	3.78667	2.18716	4.7694	3.12425	3.18125	4.07631	5.33618	3.08702	4.41959	4.21867	1.401	2.4773	4.16349	2.04965	2.11342	0.772469	4.9192	2.68713	4.16444	2.00673	1.68011	3.46498	2.51867	3.78515	6.60133
ENSG00000156521	2.88157	2.51376	2.99687	3.16944	3.17009	3.7793	3.65814	3.92871	3.29138	2.56633	1.88699	4.53558	3.85617	4.15663	2.25415	2.11644	3.55339	3.43461	2.16605	2.84051	2.95271	3.91751	3.16339	3.19977	3.05519	2.36773	4.09663	3.65104	3.28391	2.973	3.52067	1.80687	2.78598	3.11824	2.87727	3.18569	2.85125	2.11059	2.76798	3.56675	4.15498	2.04578	3.64648	2.85454	2.62227	3.9216	3.20753	2.86886	2.50275
ENSG00000172081	4.02808	3.76594	4.12596	3.85253	4.06503	4.29773	5.28074	3.97623	3.97648	4.40802	4.4846	4.21244	4.50621	5.55977	4.10652	4.34304	5.03214	3.86012	3.79087	3.67195	4.02696	3.4872	5.02495	3.26964	4.91637	3.95955	3.2294	4.31842	3.88792	4.55034	5.36412	3.97184	4.01715	3.839	4.38386	3.70145	3.67928	3.74554	4.2832	4.5543	3.9259	4.12759	4.05495	4.04269	4.16742	3.55831	4.65703	5.37066	4.24272
ENSG00000169548	0	0.0100174	0.855827	0.420414	0.0230435	0.0414959	0	0	0.0155413	0.338859	0	0	0.109113	0	0.011595	0.00701419	0	0.0898253	0	0	0	0	0	0.256549	0.0144644	0.0320055	0.486089	0	0.906285	0.0256482	0.0478185	0.027954	0.210374	0	0.0182859	0.028395	0.0397684	0	0	0.0143425	0.765076	0	0.513002	0.0371762	0	0	0	0	0
ENSG00000078579	0	0	0.0124392	0.0181526	0.0436703	0.0177473	0.0149801	0	0.0197476	0	0.015646	0	0	0	0	0	0	0.0259731	0.027812	0	0	0	0.0143329	0	0.0183811	0	0	0	0	0	0.0605794	0.0237492	0	0.0232133	0	0	0	0	0	0	0.0167979	0	0.483193	0	0	0.0300721	0	0	0
ENSG00000070748	0	0	0	0.0305708	0	0.0100327	0.00846484	0	0.0222478	0	0	0.233191	0.181251	0	0.0411678	0.0200381	0.0147933	0	0.0235552	0	0	0	0.00809829	0.166294	0.0207095	0	0.795185	0.0104014	0	0.231095	0.111824	0	0.00704748	0	0	0.0204281	0.131253	0	0.0514379	0	0	0	0.142665	0	0	0.0338642	0	0	0.257562
ENSG00000177034	1.71613	1.45586	2.25529	1.57227	2.32689	2.33443	3.0274	2.07645	2.49206	1.47193	1.68938	1.04379	1.727	0.812029	1.53853	2.13232	1.76774	1.62121	2.38324	1.73192	1.10385	1.45673	1.82199	1.79262	1.57643	1.97039	1.81791	1.89277	1.83386	1.96108	2.43665	1.89323	2.08258	2.18547	1.5013	1.38106	1.81858	1.43118	1.81523	0.860789	2.95472	1.54888	1.70189	1.98449	1.62235	1.76678	2.37237	1.55441	1.9088
ENSG00000158008	0.0164535	0.0189121	0.0502432	0.123676	0.0218287	0.0328419	0.0222374	0.0457844	0.036522	0.00462939	0.165694	0.321176	0.0331549	0.0550873	0.0646685	0.0714373	0	0.0048672	0.0411978	0.00417426	0.109415	0.0452727	0.0212789	0.0110352	0.143984	0.302933	0.127811	0.0068724	0.00620657	0.0303081	0.0747578	0.889232	0.0727286	0.0596926	0	0.111017	0.10135	0	0.0114731	0.0337237	0.0675423	0.0314183	0.0410761	0.103196	0.00651785	0	0.0607722	0.00890302	0.119009
ENSG00000182170	0	0	0	0.0691991	0	0	0.0289244	0	0	0	0	0	0	0	0	0.0172563	0	0	0	0	0	0	0	0	0	0	0	0	0	0	0	0	0.0241098	0	0	0	0	0	0	0	0	0	0	0	0	0	0	0	0
ENSG00000149571	0.0918231	0.107169	1.43595	0.188112	0.0150433	0.0271493	0.0640386	0.151657	0.362395	0.0158523	0.0435983	0.158764	0.0763441	0.0474685	0.0702599	0.864076	0.0134299	0.0364086	0.0769277	0.0396862	0.0908604	0.0844348	0.0399714	0.0486742	0.100517	0.531482	0.341288	0.0374009	0.0462896	0.0125798	0.0568917	0.186481	0.685947	0.131497	0.0296435	0.0683613	0.161264	0.0844437	0.0157528	0.0140073	0.83098	0.0323905	0.0902215	0.151155	0.0134115	0.133539	0.100086	0.0718603	0.0988828
ENSG00000146950	1.99571	1.54164	3.01931	1.48835	2.81988	2.94453	2.29206	2.58707	1.93262	1.43778	1.43951	0.835351	2.24705	1.09938	3.36462	3.21958	2.59651	2.07965	2.00161	2.32227	1.76752	2.04606	1.75112	2.66441	2.09646	2.32792	2.39204	2.765	3.1991	1.32086	1.83186	1.45021	2.27216	2.18796	2.16419	1.94434	2.64164	1.03248	2.97562	1.49617	2.47046	2.26813	2.18947	1.82499	1.90065	2.82224	2.79225	2.63578	0.665248
ENSG00000185201	2.96581	5.82664	3.91067	6.29056	4.58678	4.95132	3.47762	5.26649	5.86414	3.87247	6.55983	4.38547	4.57807	2.87527	4.4796	5.40252	3.77392	3.27273	4.9065	4.0194	4.87392	4.88011	5.75128	6.60909	5.83316	4.43575	4.40301	4.96608	5.10662	5.65329	4.69552	6.65189	5.44174	4.91938	5.16916	3.76888	5.2413	1.88725	4.45094	4.16403	4.486	5.39101	4.03211	5.45368	5.33854	4.37966	4.72497	5.13939	3.65307
ENSG00000205133	0.766976	1.44273	1.87901	2.09452	2.03253	2.10222	1.6856	2.47489	2.12188	1.47194	1.71138	0.331567	1.86951	1.02671	1.93069	2.9295	0.386789	2.07791	2.54417	1.57083	2.36143	0.976685	1.56929	1.93102	1.79315	2.15628	1.38911	1.5429	1.42925	1.70128	1.3768	1.58799	1.43801	2.13887	1.33336	1.61973	1.57632	0.572585	2.21387	1.11221	2.16004	2.42924	1.56248	1.82001	1.16182	1.40874	2.1753	1.23211	1.84657
ENSG00000173157	0.00689473	0.0177792	0.593242	0.00849063	0.0171222	0.589644	0.0104913	1.04694	0.00462708	0.023054	0.00366205	0.0783233	0.372054	0.0728824	0.0307467	0.00208399	0.0183251	0.766188	0.0195039	0.00261652	0.180498	0	0.00669927	0.126176	0.00430533	0.0143272	0.111222	0.00215625	0.13742	0.0114673	0.00479893	0.00557062	0.577198	0.268026	0.0108753	0.288161	0.179683	0.0139167	0.0071984	0.0709079	0.478284	0.393733	0.445589	0.107586	0.314941	0.258675	0.461899	0.0331845	0
ENSG00000128310	0.0634722	0	0.0181124	0	0	0.194673	0	0.207317	0.0287209	0.018069	0	0.315503	0.0260665	0.180846	0	0	0	0.0925575	0.136708	0.0641233	0.0438997	0.0443961	0.0414296	0	0.0267392	0	0.024742	0.0399614	0.0241867	0.115367	0.392681	0	0.0181667	0	0	0	0.0185942	0	0.0224098	0.0265149	0.0484772	0	0.0794651	0.101237	0.0748728	0.281086	0	0.0346015	0.116762
ENSG00000140368	0.473253	1.13258	0.967379	1.6345	1.19215	0.746782	0.459024	1.15446	2.42593	0.435599	1.44027	2.9399	1.38663	1.95063	1.02834	0.764029	1.41758	0.490494	1.1934	0.792968	1.96358	0.395735	1.37605	0.261617	2.03403	1.01373	1.88617	0.927408	1.88627	1.32715	2.98023	1.48526	1.28526	1.98097	0.6734	2.06752	1.01998	2.54442	2.25889	1.6715	1.3572	0.640537	1.93598	1.06474	0.768494	0.682373	0.876817	1.45147	0.81171
ENSG00000226733	0	0	0	0	0	0	0	0	0	0	0	0	0	0	0	0	0	0	0	0	0	0	0	0	0	0	0	0	0	0	0	0	0	0	0	0	0	0	0	0	0	0	0	0	0	0	0	0	0
ENSG00000096717	1.64119	2.09276	2.42873	2.48122	1.92325	2.20428	2.29233	2.67896	1.95531	1.68726	1.77338	0.37069	2.17719	0.57049	2.24375	1.80943	1.9567	2.01153	1.52462	2.46637	1.94093	1.74148	2.38657	1.83827	2.59938	2.1832	2.05724	2.74834	3.03398	2.33897	2.95114	2.52885	1.94888	2.64436	1.81908	2.04735	2.71228	0.548666	2.32759	1.06303	3.58897	1.88847	1.8802	2.7291	1.66302	2.23601	1.90263	1.83229	2.43577
ENSG00000196371	0.429121	0.929089	1.4008	1.33767	1.05377	0.800233	0.612801	1.51558	1.0691	0.864469	1.0235	0.255055	1.08715	0.71794	0.871535	1.67394	0.93096	0.322527	0.934349	0.49799	1.02951	0.25213	0.879731	1.32395	1.30553	1.4696	0.995835	0.571694	1.38635	0.472896	1.10763	1.15105	1.22087	1.69056	0.551655	0.59539	1.33395	0.240627	0.912152	0.391431	1.74801	0.927976	1.01952	1.63043	0.387965	0.484425	1.12314	1.0614	1.2201
ENSG00000180198	4.40247	4.03746	3.9511	4.02816	3.98078	4.25175	4.92042	4.8439	4.01457	4.57988	4.11501	3.06664	4.19052	3.19241	3.9949	3.78833	4.31163	4.9891	4.13694	4.58288	3.78788	5.63365	3.99867	3.81023	4.06358	4.34182	3.86583	3.93814	4.48068	4.20832	5.05571	3.38106	4.51642	4.03263	4.31828	4.36853	3.73153	3.00202	3.67176	4.14545	3.93046	3.02314	3.83109	4.73207	3.6084	4.89175	4.30888	4.02578	3.90861
ENSG00000101695	0.180491	0.249236	0.971811	1.15167	0.236369	0.490065	0.0723626	0.908179	0.543557	0.320437	0.320638	0.052763	0.611963	0.17056	0.376619	0.750214	0.794889	0.356542	0.431203	0.831655	0.486434	0.208599	0.290083	0.461925	1.16168	0.707558	0.407051	0.969896	0.554712	0.550639	1.61772	1.08799	0.911384	0.735284	0.116632	0.317325	0.435994	0.138383	0.542432	0.260455	2.03933	0.30566	1.34355	0.749004	0.234838	0.278657	0.359295	0.865595	0.216431
ENSG00000189298	0.637179	0.49998	1.11856	0.725344	0.912353	0.900964	0.675135	1.14746	1.02361	0.257917	0.894603	0.263352	0.924068	0.424287	0.630126	0.88897	0.493517	0.594366	1.16901	0.826834	0.80682	0.409877	0.579429	0.900689	1.00093	1.07696	0.710641	0.669563	0.965975	1.32188	1.12173	0.75085	0.674917	0.881701	0.828002	0.595914	0.659591	0.139446	1.58916	0.418836	1.62206	0.391792	0.862843	0.669552	0.466605	0.584309	0.989	0.701707	0.984739
[truncated: 18,668 more rows]
[truncated: 201 more columns]
