# Supplementary material for: Six-gene signature for predicting survival in patients with head and neck squamous cell carcinoma
Source: Aging (Albany NY). 2020 Jan 12;12(1):767–83. doi: 10.18632/aging.102655 (PMC6977678; doi:10.18632/aging.102655)
Supplement: Supplementary Table 4 [file aging-12-102655-s004..xlsx]

## Sheet: 工作表 1
Supplement table 4：Infromation of training set clinical
samples	type	age_at_initial_pathologic_diagnosis	gender	race	ajcc_pathologic_tumor_stage	histological_type	histological_grade	initial_pathologic_dx_year	menopause_status	birth_days_to	vital_status	tumor_status	last_contact_days_to	death_days_to	cause_of_death	new_tumor_event_type	new_tumor_event_site	new_tumor_event_site_other	new_tumor_event_dx_days_to	treatment_outcome_first_course	margin_status	residual_tumor	OS	OS.time	DSS	DSS.time	DFI	DFI.time	PFI	PFI.time
TCGA-P3-A6T7	HNSC	55	MALE	WHITE	Stage III	Head & Neck Squamous Cell Carcinoma	G2	2010		-20301	Dead		NA	487					NA	Complete Remission/Response			1	487	NA	487	NA	NA	0	487
TCGA-CQ-6218	HNSC	52	FEMALE	WHITE	Stage III	Head & Neck Squamous Cell Carcinoma	G2	2009		-19096	Alive	TUMOR FREE	1253	NA					NA	Complete Remission/Response			0	1253	0	1253	NA	NA	0	1253
TCGA-CR-7370	HNSC	72	FEMALE	WHITE	Stage II	Head & Neck Squamous Cell Carcinoma	G2	2009		-26468	Alive	TUMOR FREE	105	NA					NA	Complete Remission/Response			0	105	0	105	0	105	0	105
TCGA-CV-7254	HNSC	55	MALE	WHITE	Stage II	Head & Neck Squamous Cell Carcinoma	G3	1996		-20306	Dead	WITH TUMOR	NA	1459					NA				1	1459	1	1459	NA	NA	1	1459
TCGA-QK-A64Z	HNSC	79	FEMALE	WHITE	Stage II	Head & Neck Squamous Cell Carcinoma	G1	2011		-29037	Dead	WITH TUMOR	NA	641		Locoregional Recurrence	Cervical Lymph Nodes	bilateral	553	Progressive Disease			1	641	1	641	NA	NA	1	553
TCGA-CN-6994	HNSC	67	MALE	WHITE	Stage IVA	Head & Neck Squamous Cell Carcinoma	G2	2011		-24778	Alive	TUMOR FREE	1183	NA					NA	Complete Remission/Response			0	1183	0	1183	NA	NA	0	1183
TCGA-P3-A6T2	HNSC	45	MALE	WHITE	Stage II	Head & Neck Squamous Cell Carcinoma	G2	2008		-16588	Alive	TUMOR FREE	2298	NA					NA	Complete Remission/Response			0	2298	0	2298	NA	NA	0	2298
TCGA-QK-AA3J	HNSC	69	MALE	BLACK OR AFRICAN AMERICAN	Stage I	Head & Neck Squamous Cell Carcinoma Basaloid Type	G3	2013		-25469	Alive	TUMOR FREE	466	NA					NA	Complete Remission/Response			0	466	0	466	0	466	0	466
TCGA-CV-A45Y	HNSC	61	MALE	AMERICAN INDIAN OR ALASKA NATIVE	Stage IVA	Head & Neck Squamous Cell Carcinoma	G3	2000		-22442	Dead	TUMOR FREE	NA	2703				R. Lung	2318	Complete Remission/Response			1	2703	0	2703	NA	NA	1	2318
TCGA-CV-7434	HNSC	64	MALE	WHITE	Stage III	Head & Neck Squamous Cell Carcinoma	G2	1999		-23465	Dead	TUMOR FREE	NA	218					NA	Complete Remission/Response			1	218	0	218	NA	NA	0	218
TCGA-BA-A6DG	HNSC	49	MALE	WHITE	Stage IVA	Head & Neck Squamous Cell Carcinoma	G2	2012		-18052	Dead	WITH TUMOR	NA	69					NA	Progressive Disease			1	69	1	69	NA	NA	1	69
TCGA-UF-A7JS	HNSC	59	MALE	WHITE	Stage IVA	Head & Neck Squamous Cell Carcinoma	G2	2012		-21676	Dead	WITH TUMOR	NA	680		Locoregional Recurrence	Cervical Lymph Nodes		519	Complete Remission/Response			1	680	1	680	NA	NA	1	519
TCGA-CN-6012	HNSC	66	MALE	WHITE	Stage III	Head & Neck Squamous Cell Carcinoma	G2	2010		-24286	Alive	TUMOR FREE	1460	NA					NA	Complete Remission/Response			0	1460	0	1460	NA	NA	0	1460
TCGA-CV-A6JM	HNSC	85	MALE	WHITE	Stage IVA	Head & Neck Squamous Cell Carcinoma	G2	2011		-31147	Dead	TUMOR FREE	NA	194		Locoregional Recurrence	Oropharynx		107	Complete Remission/Response			1	194	0	194	NA	NA	1	107
TCGA-CR-7372	HNSC	45	MALE	WHITE	Stage II	Head & Neck Squamous Cell Carcinoma	G1	2009		-16610	Alive	TUMOR FREE	759	NA					NA	Complete Remission/Response			0	759	0	759	0	759	0	759
TCGA-DQ-5631	HNSC	52	MALE	WHITE	Stage IVA	Head & Neck Squamous Cell Carcinoma	G3	2009		-19172	Dead	WITH TUMOR	548	548			Distant Metastasis	Lung	447	Complete Remission/Response			1	548	1	548	NA	NA	1	447
TCGA-CV-6938	HNSC	87	MALE	WHITE	Stage II	Head & Neck Squamous Cell Carcinoma	G1	1996		-31825	Dead	TUMOR FREE	NA	144					NA				1	144	0	144	NA	NA	0	144
TCGA-CX-7086	HNSC	53	MALE	BLACK OR AFRICAN AMERICAN	Stage IVA	Head & Neck Squamous Cell Carcinoma	G2	2011		-19434	Alive	TUMOR FREE	573	NA					NA	Complete Remission/Response			0	573	0	573	NA	NA	0	573
TCGA-UF-A718	HNSC	62	MALE	WHITE	Stage IVA	Head & Neck Squamous Cell Carcinoma	G2	2009		-22836	Alive	TUMOR FREE	1971	NA					NA	Complete Remission/Response			0	1971	0	1971	NA	NA	0	1971
TCGA-CR-7368	HNSC	54	MALE	WHITE	Stage IVA	Head & Neck Squamous Cell Carcinoma	G2	2008		-19876	Alive	TUMOR FREE	1245	NA					NA	Complete Remission/Response			0	1245	0	1245	NA	NA	0	1245
TCGA-DQ-5630	HNSC	73	MALE	WHITE	Stage III	Head & Neck Squamous Cell Carcinoma	G2	2009		-26855	Alive	TUMOR FREE	1030	NA					NA	Complete Remission/Response			0	1030	0	1030	0	1030	0	1030
TCGA-P3-A6T6	HNSC	53	MALE	WHITE	Stage IVA	Head & Neck Squamous Cell Carcinoma	G3	2009		-19694	Dead	WITH TUMOR	NA	395		Distant Metastasis	Distant Metastasis	lung	273	Complete Remission/Response			1	395	1	395	NA	NA	1	273
TCGA-CN-6995	HNSC	78	MALE	WHITE	Stage IVA	Head & Neck Squamous Cell Carcinoma	G2	2011		-28850	Dead	TUMOR FREE	NA	112					NA	Complete Remission/Response			1	112	0	112	NA	NA	0	112
TCGA-CV-7437	HNSC	77	MALE		Stage II	Head & Neck Squamous Cell Carcinoma	GX	1996		-28221	Dead	WITH TUMOR	NA	506					NA				1	506	1	506	NA	NA	1	506
TCGA-CN-4733	HNSC	61	MALE	WHITE	Stage I	Head & Neck Squamous Cell Carcinoma	G3	2010		-22561	Alive	TUMOR FREE	1586	NA					NA	Complete Remission/Response			0	1586	0	1586	0	1586	0	1586
TCGA-CQ-5330	HNSC	69	FEMALE	WHITE	Stage III	Head & Neck Squamous Cell Carcinoma	G3	2008		-25255	Alive	TUMOR FREE	1897	NA					NA	Complete Remission/Response			0	1897	0	1897	NA	NA	0	1897
TCGA-UF-A71A	HNSC	67	MALE	WHITE	Stage IVA	Head & Neck Squamous Cell Carcinoma	G1	2009		-24623	Dead	WITH TUMOR	NA	86					NA	Complete Remission/Response			1	86	1	86	NA	NA	1	86
TCGA-BA-5151	HNSC	72	MALE	WHITE	Stage IVA	Head & Neck Squamous Cell Carcinoma	G1	2010		-26569	Alive	TUMOR FREE	722	NA					517	Complete Remission/Response			0	722	0	722	NA	NA	1	517
TCGA-CR-7364	HNSC	66	MALE	WHITE	Stage III	Head & Neck Squamous Cell Carcinoma	G2	2008		-24192	Alive	TUMOR FREE	1435	NA					NA	Complete Remission/Response			0	1435	0	1435	0	1435	0	1435
TCGA-HL-7533	HNSC	65	MALE	WHITE	Stage IVA	Head & Neck Squamous Cell Carcinoma	G3	2008		-23950	Alive	TUMOR FREE	1057	NA					NA	Complete Remission/Response			0	1057	0	1057	NA	NA	0	1057
TCGA-CR-5248	HNSC	53	MALE	WHITE	Stage IVA	Head & Neck Squamous Cell Carcinoma	G3	2006		-19441	Alive	WITH TUMOR	1663	NA			Cervical Lymph Nodes		936	Complete Remission/Response			0	1663	0	1663	NA	NA	1	936
TCGA-CV-5971	HNSC	60	MALE	WHITE	Stage IVA	Head & Neck Squamous Cell Carcinoma	G2	2009		-22279	Alive	TUMOR FREE	701	NA					NA				0	701	0	701	NA	NA	0	701
TCGA-CV-7248	HNSC	63	FEMALE	BLACK OR AFRICAN AMERICAN	Stage IVA	Head & Neck Squamous Cell Carcinoma	G2	2001		-23082	Dead	TUMOR FREE	NA	521					NA				1	521	0	521	NA	NA	0	521
TCGA-CV-5978	HNSC	53	FEMALE	BLACK OR AFRICAN AMERICAN	Stage IVB	Head & Neck Squamous Cell Carcinoma	G2	2008		-19480	Dead	WITH TUMOR	215	215					NA				1	215	1	215	NA	NA	1	215
TCGA-UF-A7JC	HNSC	42	MALE	WHITE	Stage III	Head & Neck Squamous Cell Carcinoma	G1	2012		-15452	Dead	WITH TUMOR	NA	546			Oral Cavity		229	Complete Remission/Response			1	546	1	546	NA	NA	1	229
TCGA-F7-A61V	HNSC	54	MALE	WHITE		Head & Neck Squamous Cell Carcinoma	G1	2012		-19857	Alive	TUMOR FREE	759	NA					NA	Complete Remission/Response			0	759	0	759	0	759	0	759
TCGA-CV-7435	HNSC	57	FEMALE	WHITE	Stage IVA	Head & Neck Squamous Cell Carcinoma	G2	1999		-21049	Dead	TUMOR FREE	NA	4680					NA	Complete Remission/Response			1	4680	0	4680	NA	NA	0	4680
TCGA-D6-A6ES	HNSC	50	MALE	WHITE	Stage IVA	Head & Neck Squamous Cell Carcinoma	G2	2013		-18408	Alive	TUMOR FREE	389	NA					NA	Complete Remission/Response			0	389	0	389	NA	NA	0	389
TCGA-C9-A480	HNSC	45	FEMALE	ASIAN	Stage III	Head & Neck Squamous Cell Carcinoma	G1	2011		-16567	Alive	TUMOR FREE	386	NA					NA	Complete Remission/Response			0	386	0	386	0	386	0	386
TCGA-CV-A6JE	HNSC	78	MALE	WHITE	Stage II	Head & Neck Squamous Cell Carcinoma	G2	2011		-28658	Alive	TUMOR FREE	1075	NA					NA	Complete Remission/Response			0	1075	0	1075	0	1075	0	1075
TCGA-CR-7374	HNSC	67	FEMALE	WHITE	Stage II	Head & Neck Squamous Cell Carcinoma	G2	2009		-24558	Alive	WITH TUMOR	30	NA					NA				0	30	0	30	NA	NA	0	30
TCGA-DQ-7592	HNSC	57	MALE	AMERICAN INDIAN OR ALASKA NATIVE	Stage IVA	Head & Neck Squamous Cell Carcinoma	G2	2011		-21041	Alive	TUMOR FREE	1143	NA					NA	Complete Remission/Response			0	1143	0	1143	NA	NA	0	1143
TCGA-CV-7418	HNSC	62	MALE	BLACK OR AFRICAN AMERICAN	Stage IVA	Head & Neck Squamous Cell Carcinoma	G2	1996		-22805	Dead	TUMOR FREE	NA	789		Locoregional Recurrence	Hypopharynx	nasopharynx	494	Complete Remission/Response			1	789	0	789	NA	NA	1	494
TCGA-D6-8568	HNSC	62	MALE	WHITE	Stage II	Head & Neck Squamous Cell Carcinoma	G2	2012		-22796	Alive	TUMOR FREE	759	NA					NA	Stable Disease			0	759	0	759	NA	NA	0	759
TCGA-CV-6953	HNSC	80	FEMALE	WHITE	Stage III	Head & Neck Squamous Cell Carcinoma	G1	1997		-29465	Dead	WITH TUMOR	NA	1641		Locoregional Recurrence	Oral Cavity	oral tongue	1521	Complete Remission/Response			1	1641	1	1641	1	1521	1	1521
TCGA-UF-A71D	HNSC	54	FEMALE	WHITE	Stage IVA	Head & Neck Squamous Cell Carcinoma	G2	2010		-19747	Alive	TUMOR FREE	1461	NA					NA	Complete Remission/Response			0	1461	0	1461	NA	NA	0	1461
TCGA-D6-8569	HNSC	52	MALE	WHITE	Stage II	Head & Neck Squamous Cell Carcinoma	G2	2012		-19212	Alive	TUMOR FREE	770	NA					NA	Stable Disease			0	770	0	770	NA	NA	0	770
TCGA-BA-5556	HNSC	58	FEMALE	WHITE	Stage II	Head & Neck Squamous Cell Carcinoma	G3	2010		-21444	Alive	TUMOR FREE	725	NA					NA	Complete Remission/Response			0	725	0	725	0	725	0	725
TCGA-CV-5435	HNSC	57	MALE	WHITE	Stage IVA	Head & Neck Squamous Cell Carcinoma	G3	2000		-20926	Dead	WITH TUMOR	1438	2319			Distant Metastasis	Lung	284				1	2319	1	2319	NA	NA	1	284
TCGA-CV-A465	HNSC	24	MALE	WHITE	Stage II	Head & Neck Squamous Cell Carcinoma	G1	2008		-9015	Dead	TUMOR FREE	NA	215					NA	Complete Remission/Response			1	215	0	215	0	215	0	215
TCGA-CV-7438	HNSC	87	FEMALE	WHITE	Stage II	Head & Neck Squamous Cell Carcinoma	G3	2000		-32021	Dead	WITH TUMOR	NA	194					NA				1	194	1	194	NA	NA	1	194
TCGA-CV-5432	HNSC	68	MALE	WHITE	Stage III	Head & Neck Squamous Cell Carcinoma	G3	2000		-25006	Alive	TUMOR FREE	3930	NA					NA				0	3930	0	3930	NA	NA	0	3930
TCGA-F7-A61W	HNSC	51	MALE	ASIAN		Head & Neck Squamous Cell Carcinoma	G2	2012		-18879	Alive	TUMOR FREE	14	NA					NA				0	14	0	14	NA	NA	0	14
TCGA-CR-7385	HNSC	42	MALE	WHITE	Stage IVA	Head & Neck Squamous Cell Carcinoma	G2	2008		-15477	Alive	TUMOR FREE	997	NA					NA	Complete Remission/Response			0	997	0	997	NA	NA	0	997
TCGA-CN-A49B	HNSC	71	MALE	WHITE	Stage III	Head & Neck Squamous Cell Carcinoma	G3	2011		-26155	Alive	TUMOR FREE	904	NA					NA	Complete Remission/Response			0	904	0	904	0	904	0	904
TCGA-BA-A6DI	HNSC	62	MALE	BLACK OR AFRICAN AMERICAN	Stage III	Head & Neck Squamous Cell Carcinoma	G2	2012		-22857	Dead	WITH TUMOR	NA	336			Larynx		266	Complete Remission/Response			1	336	1	336	1	266	1	266
TCGA-BB-A5HY	HNSC	64	MALE	WHITE	Stage IVA	Head & Neck Squamous Cell Carcinoma	G3	2012		-23640	Dead	WITH TUMOR	NA	321		Distant Metastasis	Distant Metastasis	Cerebellum	230	Complete Remission/Response			1	321	1	321	NA	NA	1	230
TCGA-CQ-6227	HNSC	77	MALE	WHITE	Stage III	Head & Neck Squamous Cell Carcinoma	G2	2008		-28466	Dead	WITH TUMOR	NA	129					NA	Progressive Disease			1	129	1	129	NA	NA	1	129
TCGA-CV-5977	HNSC	66	MALE	WHITE	Stage III	Head & Neck Squamous Cell Carcinoma	G2	2007		-24115	Alive	TUMOR FREE	1840	NA					NA	Complete Remission/Response			0	1840	0	1840	NA	NA	0	1840
TCGA-CV-7411	HNSC	64	FEMALE	WHITE	Stage IVA	Head & Neck Squamous Cell Carcinoma	G1	1994		-23696	Dead		NA	2717					NA				1	2717	NA	2717	NA	NA	0	2717
TCGA-CR-6493	HNSC	69	MALE	BLACK OR AFRICAN AMERICAN	Stage IVA	Head & Neck Squamous Cell Carcinoma	G2	2010		-25432	Dead	WITH TUMOR	NA	282		Locoregional Recurrence	Oral Cavity	Right gingiva	247	Complete Remission/Response			1	282	1	282	NA	NA	1	247
TCGA-HD-8224	HNSC	63	MALE	WHITE	Stage III	Head & Neck Squamous Cell Carcinoma	G3	2011		-23069	Dead	WITH TUMOR	NA	446		Distant Metastasis	Distant Metastasis	Lung	171	Progressive Disease			1	446	1	446	NA	NA	1	171
TCGA-CQ-5331	HNSC	73	FEMALE	WHITE	Stage IVA	Head & Neck Squamous Cell Carcinoma	G2	2008		-26901	Alive	TUMOR FREE	1399	NA					NA	Complete Remission/Response			0	1399	0	1399	NA	NA	0	1399
TCGA-CR-7391	HNSC	36	FEMALE	WHITE	Stage I	Head & Neck Squamous Cell Carcinoma	G1	2009		-13508	Alive	TUMOR FREE	913	NA					NA	Complete Remission/Response			0	913	0	913	0	913	0	913
TCGA-CQ-7068	HNSC	80	FEMALE	WHITE	Stage II	Head & Neck Squamous Cell Carcinoma	G2	2010		-29530	Alive	TUMOR FREE	1309	NA		New Primary Tumor	Oral Cavity	left buccal mucosa	1148	Complete Remission/Response			0	1309	0	1309	0	1309	1	1148
TCGA-CV-7252	HNSC	62	FEMALE	BLACK OR AFRICAN AMERICAN	Stage III	Head & Neck Squamous Cell Carcinoma	G2	1994		-22934	Dead	WITH TUMOR	NA	151					NA	Progressive Disease			1	151	1	151	NA	NA	1	151
TCGA-CN-A63U	HNSC	50	MALE	WHITE	Stage III	Head & Neck Squamous Cell Carcinoma	G3	2011		-18272	Alive	TUMOR FREE	964	NA					NA	Complete Remission/Response			0	964	0	964	NA	NA	0	964
TCGA-CR-7398	HNSC	53	FEMALE	WHITE	Stage II	Head & Neck Squamous Cell Carcinoma	G2	2011		-19468	Alive	TUMOR FREE	156	NA					NA	Complete Remission/Response			0	156	0	156	0	156	0	156
TCGA-UF-A7JT	HNSC	72	FEMALE	WHITE	Stage IVA	Head & Neck Squamous Cell Carcinoma	G3	2009		-26375	Dead	WITH TUMOR	NA	993				Cervix	718	Complete Remission/Response			1	993	1	993	NA	NA	1	718
TCGA-BB-4223	HNSC	48	MALE	WHITE	Stage IVA	Head & Neck Squamous Cell Carcinoma	G3	2003		-17608	Alive	TUMOR FREE	3221	NA					NA	Complete Remission/Response			0	3221	0	3221	NA	NA	0	3221
TCGA-QK-A6VB	HNSC	66	MALE	WHITE	Stage IVA	Head & Neck Squamous Cell Carcinoma	G2	2013		-24144	Alive	TUMOR FREE	641	NA		New Primary Tumor		Acute myeloid leukemia	613	Complete Remission/Response			0	641	0	641	NA	NA	1	613
TCGA-P3-A5Q5	HNSC	54	MALE	WHITE	Stage IVA	Head & Neck Squamous Cell Carcinoma Basaloid Type	G3	2004		-19728	Alive	TUMOR FREE	910	NA					NA	Complete Remission/Response			0	910	0	910	NA	NA	0	910
TCGA-D6-A4Z9	HNSC	59	MALE	WHITE	Stage IVA	Head & Neck Squamous Cell Carcinoma	G2	2012		-21659	Alive	TUMOR FREE	539	NA					NA	Complete Remission/Response			0	539	0	539	NA	NA	0	539
TCGA-CQ-7072	HNSC	51	MALE	WHITE	Stage IVA	Head & Neck Squamous Cell Carcinoma	G3	2007		-18841	Alive	TUMOR FREE	2359	NA					NA	Complete Remission/Response			0	2359	0	2359	NA	NA	0	2359
TCGA-CQ-6229	HNSC	61	MALE	WHITE	Stage III	Head & Neck Squamous Cell Carcinoma	G2	2009		-22541	Alive	TUMOR FREE	1179	NA					NA	Complete Remission/Response			0	1179	0	1179	0	1179	0	1179
TCGA-CR-7392	HNSC	67	FEMALE	WHITE	Stage IVA	Head & Neck Squamous Cell Carcinoma	G1	2009		-24650	Alive	TUMOR FREE	1425	NA					NA	Complete Remission/Response			0	1425	0	1425	NA	NA	0	1425
TCGA-F7-8298	HNSC	58	MALE	WHITE	Stage I	Head & Neck Squamous Cell Carcinoma	G1	2011		-21445	Alive	TUMOR FREE	995	NA					NA	Complete Remission/Response			0	995	0	995	0	995	0	995
TCGA-D6-A6EP	HNSC	62	MALE	WHITE	Stage III	Head & Neck Squamous Cell Carcinoma	G3	2013		-22674	Alive	TUMOR FREE	424	NA					NA	Complete Remission/Response			0	424	0	424	0	424	0	424
TCGA-CR-6470	HNSC	38	MALE	WHITE	Stage IVA	Head & Neck Squamous Cell Carcinoma	G2	2007		-14133	Alive	TUMOR FREE	1521	NA					NA	Complete Remission/Response			0	1521	0	1521	NA	NA	0	1521
TCGA-CV-A461	HNSC	65	MALE	WHITE	Stage III	Head & Neck Squamous Cell Carcinoma	G2	2004		-23955	Dead	TUMOR FREE	NA	2064					NA	Complete Remission/Response			1	2064	0	2064	0	2064	0	2064
TCGA-HD-8635	HNSC	61	FEMALE	WHITE	Stage III	Head & Neck Squamous Cell Carcinoma	G2	2012		-22340	Alive	TUMOR FREE	695	NA					NA	Complete Remission/Response			0	695	0	695	0	695	0	695
TCGA-CR-7367	HNSC	52	MALE	WHITE	Stage IVB	Head & Neck Squamous Cell Carcinoma	G1	2008		-19116	Alive	TUMOR FREE	1440	NA					NA	Complete Remission/Response			0	1440	0	1440	NA	NA	0	1440
TCGA-CV-7421	HNSC	76	MALE	WHITE	Stage IVA	Head & Neck Squamous Cell Carcinoma	G2	1997		-27961	Dead		NA	2					NA				1	2	NA	2	NA	NA	0	2
TCGA-CR-6473	HNSC	68	MALE	WHITE	Stage IVA	Head & Neck Squamous Cell Carcinoma	G3	2008		-24857	Alive	TUMOR FREE	1125	NA					NA	Complete Remission/Response			0	1125	0	1125	NA	NA	0	1125
TCGA-CQ-6221	HNSC	79	MALE	WHITE	Stage II	Head & Neck Squamous Cell Carcinoma	G3	2008		-29026	Alive	TUMOR FREE	1000	NA					NA	Complete Remission/Response			0	1000	0	1000	0	1000	0	1000
TCGA-CV-7446	HNSC	66	MALE	WHITE	Stage II	Head & Neck Squamous Cell Carcinoma	G2	1998		-24170	Dead	WITH TUMOR	NA	1093					NA				1	1093	1	1093	NA	NA	1	1093
TCGA-CN-6010	HNSC	53	MALE	WHITE	Stage IVA	Head & Neck Squamous Cell Carcinoma	G2	2010		-19475	Alive	TUMOR FREE	1523	NA		New Primary Tumor		nasal cavity	540	Complete Remission/Response			0	1523	0	1523	NA	NA	1	540
TCGA-CV-7414	HNSC	78	MALE	WHITE	Stage III	Head & Neck Squamous Cell Carcinoma	G2	1995		-28603	Dead		NA	14					NA	Complete Remission/Response			1	14	NA	14	NA	NA	0	14
TCGA-CN-4722	HNSC	61	FEMALE	WHITE	Stage II	Head & Neck Squamous Cell Carcinoma	G1	2010		-22299	Alive	TUMOR FREE	1483	NA					NA	Complete Remission/Response			0	1483	0	1483	0	1483	0	1483
TCGA-TN-A7HL	HNSC	59	MALE	WHITE	Stage IVA	Head & Neck Squamous Cell Carcinoma	G2	2013		-21731	Alive	TUMOR FREE	619	NA					NA	Complete Remission/Response			0	619	0	619	NA	NA	0	619
TCGA-CN-4731	HNSC	63	FEMALE	WHITE	Stage IVA	Head & Neck Squamous Cell Carcinoma	G3	2010		-23194	Dead	WITH TUMOR	NA	998			Oral Cavity		243	Persistent Disease			1	998	1	998	NA	NA	1	243
TCGA-CN-6989	HNSC	64	MALE	WHITE	Stage IVA	Head & Neck Squamous Cell Carcinoma	G2	2011		-23515	Dead	WITH TUMOR	NA	980					436	Complete Remission/Response			1	980	1	980	NA	NA	1	436
TCGA-BA-A4II	HNSC	46	MALE	WHITE	Stage I	Head & Neck Squamous Cell Carcinoma	G1	2011		-17011	Alive	WITH TUMOR	918	NA		Locoregional Disease	Oral Cavity	L FOM	197	Complete Remission/Response			0	918	0	918	1	197	1	197
TCGA-CV-7091	HNSC	54	MALE	WHITE	Stage I	Head & Neck Squamous Cell Carcinoma	G3	2001		-19938	Alive	TUMOR FREE	3381	NA					NA				0	3381	0	3381	NA	NA	0	3381
TCGA-D6-6826	HNSC	64	FEMALE	WHITE	Stage IVA	Head & Neck Squamous Cell Carcinoma	G2	2011		-23722	Dead	TUMOR FREE	NA	348					NA	Complete Remission/Response			1	348	0	348	NA	NA	0	348
TCGA-CV-A45O	HNSC	57	MALE	WHITE	Stage III	Head & Neck Squamous Cell Carcinoma	G2	1994		-20868	Alive	TUMOR FREE	851	NA					NA				0	851	0	851	NA	NA	0	851
TCGA-CV-A45V	HNSC	87	FEMALE	WHITE	Stage IVA	Head & Neck Squamous Cell Carcinoma	G1	1999		-31936	Dead		NA	32					NA				1	32	NA	32	NA	NA	0	32
TCGA-T3-A92M	HNSC	52	MALE	BLACK OR AFRICAN AMERICAN	Stage IVA	Head & Neck Squamous Cell Carcinoma	G2	2013		-19247	Alive	WITH TUMOR	417	NA		Distant Metastasis	Distant Metastasis	(Rt) Lung	417				0	417	0	417	NA	NA	1	417
TCGA-CR-6471	HNSC	58	MALE	WHITE	Stage IVA	Head & Neck Squamous Cell Carcinoma	G2	2007		-21315	Dead	WITH TUMOR	NA	1202			Oropharynx		498	Complete Remission/Response			1	1202	1	1202	NA	NA	1	498
TCGA-UF-A7JJ	HNSC	68	MALE		Stage IVA	Head & Neck Squamous Cell Carcinoma	G1	2013		-25201	Alive	TUMOR FREE	549	NA					NA	Complete Remission/Response			0	549	0	549	NA	NA	0	549
TCGA-CV-6939	HNSC	60	MALE	WHITE	Stage IVA	Head & Neck Squamous Cell Carcinoma	G3	1994		-21947	Dead	WITH TUMOR	NA	666					NA				1	666	1	666	NA	NA	1	666
TCGA-CV-7090	HNSC	39	MALE	WHITE	Stage II	Head & Neck Squamous Cell Carcinoma	G2	2001		-14515	Alive	TUMOR FREE	5252	NA					NA	Complete Remission/Response			0	5252	0	5252	0	5252	0	5252
TCGA-P3-A6T0	HNSC	47	FEMALE	WHITE	Stage IVA	Head & Neck Squamous Cell Carcinoma	G2	2007		-17259	Alive	TUMOR FREE	578	NA		Locoregional Disease	Oral Cavity		365	Complete Remission/Response			0	578	0	578	NA	NA	1	365
TCGA-CN-A499	HNSC	60	FEMALE	WHITE	Stage I	Head & Neck Squamous Cell Carcinoma	G2	2011		-21971	Alive	TUMOR FREE	717	NA					NA	Complete Remission/Response			0	717	0	717	0	717	0	717
TCGA-H7-A6C4	HNSC	35	FEMALE	WHITE	Stage III	Head & Neck Squamous Cell Carcinoma	G2	2012		-13137	Alive	TUMOR FREE	414	NA		Locoregional Recurrence	Distant Metastasis	stoma site	235	Complete Remission/Response			0	414	0	414	NA	NA	1	235
TCGA-CV-6951	HNSC	57	MALE	WHITE	Stage IVA	Head & Neck Squamous Cell Carcinoma	G2	1996		-21166	Dead	WITH TUMOR	NA	915					NA				1	915	1	915	NA	NA	1	915
TCGA-IQ-A61E	HNSC	55	FEMALE	WHITE	Stage III	Head & Neck Squamous Cell Carcinoma	G2	2011		-20417	Alive	TUMOR FREE	1147	NA					NA	Complete Remission/Response			0	1147	0	1147	0	1147	0	1147
TCGA-IQ-7631	HNSC	60	FEMALE	WHITE	Stage II	Head & Neck Squamous Cell Carcinoma	G1	2011		-22151	Alive	TUMOR FREE	1172	NA					NA	Complete Remission/Response			0	1172	0	1172	0	1172	0	1172
TCGA-UF-A7J9	HNSC	75	MALE	WHITE	Stage IVA	Head & Neck Squamous Cell Carcinoma	G2	2011		-27459	Alive	TUMOR FREE	1358	NA					NA	Complete Remission/Response			0	1358	0	1358	NA	NA	0	1358
TCGA-D6-A6EK	HNSC	67	MALE	WHITE	Stage IVA	Head & Neck Squamous Cell Carcinoma	G1	2012		-24558	Alive	TUMOR FREE	875	NA					NA	Partial Remission/Response			0	875	0	875	NA	NA	0	875
TCGA-CV-6436	HNSC	62	MALE	WHITE	Stage III	Head & Neck Squamous Cell Carcinoma	G1	2007		-22885	Alive	TUMOR FREE	1899	NA					NA				0	1899	0	1899	NA	NA	0	1899
TCGA-F7-8489	HNSC	48	MALE	WHITE	Stage II	Head & Neck Squamous Cell Carcinoma	G1	2012		-17873	Alive	TUMOR FREE	658	NA					NA	Complete Remission/Response			0	658	0	658	0	658	0	658
TCGA-CV-7253	HNSC	58	MALE	BLACK OR AFRICAN AMERICAN	Stage II	Head & Neck Squamous Cell Carcinoma	G2	1993		-21473	Dead	WITH TUMOR	NA	361					NA	Partial Remission/Response			1	361	1	361	NA	NA	1	361
TCGA-CQ-6224	HNSC	52	MALE	WHITE	Stage II	Head & Neck Squamous Cell Carcinoma	G3	2009		-19051	Alive	TUMOR FREE	1721	NA					NA	Complete Remission/Response			0	1721	0	1721	NA	NA	0	1721
TCGA-CR-6472	HNSC	59	MALE	WHITE	Stage IVB	Head & Neck Squamous Cell Carcinoma	G3	2008		-21654	Alive	TUMOR FREE	1050	NA					NA	Complete Remission/Response			0	1050	0	1050	NA	NA	0	1050
TCGA-CN-4730	HNSC	62	MALE	WHITE	Stage IVA	Head & Neck Squamous Cell Carcinoma	G2	2010		-22828	Alive	TUMOR FREE	817	NA					NA	Complete Remission/Response			0	817	0	817	NA	NA	0	817
TCGA-BA-4078	HNSC	83	MALE	WHITE	Stage IVA	Head & Neck Squamous Cell Carcinoma	G2	2003		-30480	Dead	WITH TUMOR	NA	276					NA				1	276	1	276	NA	NA	1	276
TCGA-CV-7183	HNSC	53	MALE	WHITE	Stage II	Head & Neck Squamous Cell Carcinoma	G1	2002		-19358	Alive	TUMOR FREE	3981	NA					NA	Complete Remission/Response			0	3981	0	3981	0	3981	0	3981
TCGA-BB-4227	HNSC	66	MALE	WHITE	Stage IVA	Head & Neck Squamous Cell Carcinoma	G2	2010		-24322	Alive	WITH TUMOR	134	NA		Locoregional Recurrence	Hypopharynx		85	Stable Disease			0	134	0	134	NA	NA	1	85
TCGA-CR-6478	HNSC	66	FEMALE	WHITE	Stage IVA	Head & Neck Squamous Cell Carcinoma	G3	2010		-24244	Dead		NA	183					NA	Complete Remission/Response			1	183	NA	183	NA	NA	0	183
TCGA-CV-6940	HNSC	80	FEMALE	WHITE	Stage I	Head & Neck Squamous Cell Carcinoma	G2	2002		-29382	Dead	TUMOR FREE	NA	804					NA	Complete Remission/Response			1	804	0	804	0	804	0	804
TCGA-DQ-7591	HNSC	62	MALE	WHITE	Stage IVA	Head & Neck Squamous Cell Carcinoma	G4	2011		-22798	Alive	TUMOR FREE	622	NA					NA	Complete Remission/Response			0	622	0	622	NA	NA	0	622
TCGA-H7-8501	HNSC	54	MALE	WHITE	Stage IVA	Head & Neck Squamous Cell Carcinoma	GX	2012		-19808	Alive	TUMOR FREE	461	NA					NA	Complete Remission/Response			0	461	0	461	NA	NA	0	461
TCGA-HD-8634	HNSC	51	FEMALE	WHITE	Stage I	Head & Neck Squamous Cell Carcinoma	G2	2012		-18718	Dead	TUMOR FREE	NA	385					NA	Complete Remission/Response			1	385	0	385	0	385	0	385
TCGA-CN-4739	HNSC	71	MALE	WHITE	Stage IVA	Head & Neck Squamous Cell Carcinoma	G2	2009		-26081	Dead	WITH TUMOR	NA	1394		Locoregional Recurrence	Oropharynx	OROPHARYNX, OVERLAPPING	1302	Complete Remission/Response			1	1394	1	1394	NA	NA	1	1302
TCGA-MZ-A7D7	HNSC	51	MALE	WHITE	Stage IVA	Head & Neck Squamous Cell Carcinoma		2013		-18974	Alive	WITH TUMOR	547	NA		Distant Metastasis	Distant Metastasis	lung	339	Complete Remission/Response			0	547	0	547	NA	NA	1	339
TCGA-F7-A50G	HNSC	66	MALE	WHITE		Head & Neck Squamous Cell Carcinoma	G1	2012		-24285	Alive	TUMOR FREE	616	NA					NA	Complete Remission/Response			0	616	0	616	0	616	0	616
TCGA-CR-7377	HNSC	58	MALE	WHITE	Stage IVA	Head & Neck Squamous Cell Carcinoma	G3	2008		-21371	Dead		NA	279					NA	Complete Remission/Response			1	279	NA	279	NA	NA	0	279
TCGA-CN-5365	HNSC	38	MALE	WHITE	Stage IVC	Head & Neck Squamous Cell Carcinoma	G2	2006		-14190	Dead	WITH TUMOR	NA	351					NA	Progressive Disease			1	351	1	351	NA	NA	1	351
TCGA-CN-6011	HNSC	57	MALE	WHITE	Stage IVA	Head & Neck Squamous Cell Carcinoma	G3	2010		-21016	Alive	TUMOR FREE	933	NA					NA	Complete Remission/Response			0	933	0	933	NA	NA	0	933
TCGA-CV-5442	HNSC	76	FEMALE	WHITE	Stage IVA	Head & Neck Squamous Cell Carcinoma	G3	2004		-28040	Alive	TUMOR FREE	2327	NA					NA	Complete Remission/Response			0	2327	0	2327	NA	NA	0	2327
TCGA-CV-5430	HNSC	61	MALE	WHITE	Stage IVA	Head & Neck Squamous Cell Carcinoma	G3	1999		-22577	Alive	TUMOR FREE	4241	NA			Distant Metastasis	Lung	783	Complete Remission/Response			0	4241	0	4241	NA	NA	1	783
TCGA-BA-A6DD	HNSC	44	MALE	BLACK OR AFRICAN AMERICAN	Stage IVA	Head & Neck Squamous Cell Carcinoma	G2	2013		-16401	Dead	WITH TUMOR	NA	173			Cervical Lymph Nodes		96	Progressive Disease			1	173	1	173	NA	NA	1	96
TCGA-BA-5559	HNSC	71	MALE	WHITE	Stage IVA	Head & Neck Squamous Cell Carcinoma	G3	2006		-26286	Dead	WITH TUMOR	NA	2083			Oropharynx		1614	Complete Remission/Response			1	2083	1	2083	NA	NA	1	1614
TCGA-CV-6441	HNSC	60	MALE	WHITE	Stage III	Head & Neck Squamous Cell Carcinoma	G3	2010		-22025	Dead	WITH TUMOR	NA	292		Locoregional Recurrence	Oral Cavity	pharyngeal	95	Progressive Disease			1	292	1	292	NA	NA	1	95
TCGA-CV-A6JU	HNSC	61	FEMALE	WHITE	Stage IVA	Head & Neck Squamous Cell Carcinoma	G2	2011		-22591	Alive	TUMOR FREE	110	NA					NA	Complete Remission/Response			0	110	0	110	NA	NA	0	110
TCGA-CV-5439	HNSC	62	MALE	WHITE	Stage II	Head & Neck Squamous Cell Carcinoma	G2	2002		-22686	Dead	WITH TUMOR	546	546			Oropharynx		211				1	546	1	546	NA	NA	1	211
TCGA-CR-7394	HNSC	70	MALE	WHITE	Stage IVA	Head & Neck Squamous Cell Carcinoma	G2	2009		-25581	Alive	TUMOR FREE	1346	NA					NA	Complete Remission/Response			0	1346	0	1346	NA	NA	0	1346
TCGA-CR-7376	HNSC	83	MALE	WHITE	Stage II	Head & Neck Squamous Cell Carcinoma	G2	2009		-30670	Alive	TUMOR FREE	972	NA					NA	Complete Remission/Response			0	972	0	972	0	972	0	972
TCGA-HD-A633	HNSC	74	MALE	WHITE	Stage IVA	Head & Neck Squamous Cell Carcinoma	G2	2012		-27057	Alive	WITH TUMOR	421	NA		Locoregional Recurrence	Oral Cavity	Buccal Space & Infratemporal Fossa	419	Complete Remission/Response			0	421	0	421	NA	NA	1	419
TCGA-MT-A67D	HNSC	55	MALE	WHITE	Stage II	Head & Neck Squamous Cell Carcinoma	G2	2012		-20386	Alive		56	NA					NA	Complete Remission/Response			0	56	0	56	0	56	0	56
TCGA-CV-6942	HNSC	73	FEMALE	WHITE	Stage II	Head & Neck Squamous Cell Carcinoma	G3	2000		-26941	Alive	TUMOR FREE	4282	NA					NA	Complete Remission/Response			0	4282	0	4282	0	4282	0	4282
TCGA-CV-5434	HNSC	60	MALE	BLACK OR AFRICAN AMERICAN	Stage IVA	Head & Neck Squamous Cell Carcinoma	G2	2000		-22182	Dead	TUMOR FREE	3295	3314			Distant Metastasis	Lung	1859	Complete Remission/Response			1	3314	0	3314	NA	NA	1	1859
TCGA-DQ-5625	HNSC	52	FEMALE	WHITE	Stage II	Head & Neck Squamous Cell Carcinoma	G2	2008		-19211	Dead	TUMOR FREE	NA	1133			Oral Cavity		1058	Complete Remission/Response			1	1133	0	1133	1	1058	1	1058
TCGA-CN-6020	HNSC	58	MALE	BLACK OR AFRICAN AMERICAN	Stage IVA	Head & Neck Squamous Cell Carcinoma	G2	2011		-21232	Dead	TUMOR FREE	NA	205					NA	Complete Remission/Response			1	205	0	205	NA	NA	0	205
TCGA-CV-6962	HNSC	65	MALE	WHITE	Stage III	Head & Neck Squamous Cell Carcinoma	G2	1999		-24103	Dead	TUMOR FREE	NA	126					NA				1	126	0	126	NA	NA	0	126
TCGA-T2-A6WX	HNSC	73	FEMALE	WHITE	Stage III	Head & Neck Squamous Cell Carcinoma	G1	2010		-27005	Dead	WITH TUMOR	NA	209					NA	Progressive Disease			1	209	1	209	NA	NA	1	209
TCGA-CN-4735	HNSC	52	MALE	WHITE	Stage IVA	Head & Neck Squamous Cell Carcinoma	G3	2010		-19107	Alive	TUMOR FREE	1737	NA					NA	Complete Remission/Response			0	1737	0	1737	NA	NA	0	1737
TCGA-CV-7095	HNSC	87	FEMALE		Stage IVA	Head & Neck Squamous Cell Carcinoma	G2	2001		-32022	Dead	TUMOR FREE	NA	572					NA				1	572	0	572	NA	NA	0	572
TCGA-MT-A67F	HNSC	60	FEMALE	WHITE	Stage IVA	Head & Neck Squamous Cell Carcinoma	G2	2012		-22057	Alive	TUMOR FREE	384	NA					NA	Complete Remission/Response			0	384	0	384	NA	NA	0	384
TCGA-CV-7427	HNSC	73	FEMALE	WHITE	Stage II	Head & Neck Squamous Cell Carcinoma	G1	1997		-26975	Dead	TUMOR FREE	NA	4760		Locoregional Recurrence	Oral Cavity	Maxilla	3282	Complete Remission/Response			1	4760	0	4760	1	3282	1	3282
TCGA-QK-A6IJ	HNSC	71	MALE	WHITE	Stage II	Head & Neck Squamous Cell Carcinoma	G3	2013		-25966	Alive	TUMOR FREE	387	NA					NA				0	387	0	387	NA	NA	0	387
TCGA-CR-7382	HNSC	49	MALE	WHITE	Stage IVA	Head & Neck Squamous Cell Carcinoma	G2	2008		-18078	Alive	TUMOR FREE	796	NA			Oral Cavity	Tongue	614	Complete Remission/Response			0	796	0	796	NA	NA	1	614
TCGA-CN-A63W	HNSC	48	FEMALE	WHITE	Stage IVA	Head & Neck Squamous Cell Carcinoma	G2	2012		-17693	Dead	TUMOR FREE	NA	377					NA	Complete Remission/Response			1	377	0	377	NA	NA	0	377
TCGA-CQ-A4CI	HNSC	73	MALE	WHITE		Head & Neck Squamous Cell Carcinoma Basaloid Type	G3	2011		-26664	Alive	WITH TUMOR	950	NA			Distant Metastasis	lung	517	Complete Remission/Response			0	950	0	950	1	517	1	517
TCGA-CR-6482	HNSC	62	MALE	BLACK OR AFRICAN AMERICAN	Stage IVA	Head & Neck Squamous Cell Carcinoma	G3	2010		-22741	Alive	TUMOR FREE	345	NA					NA	Complete Remission/Response			0	345	0	345	NA	NA	0	345
TCGA-CN-4736	HNSC	70	FEMALE	WHITE	Stage II	Head & Neck Squamous Cell Carcinoma	G2	2010		-25683	Dead	WITH TUMOR	NA	395			Cervical Lymph Nodes	R NECK	209	Complete Remission/Response			1	395	1	395	1	209	1	209
TCGA-IQ-A61O	HNSC	43	MALE	WHITE	Stage IVA	Head & Neck Squamous Cell Carcinoma, Spindle Cell Variant	GX	2012		-15920	Dead	TUMOR FREE	NA	421					NA	Complete Remission/Response			1	421	0	421	NA	NA	0	421
TCGA-BA-A6D8	HNSC	59	MALE	BLACK OR AFRICAN AMERICAN	Stage IVA	Head & Neck Squamous Cell Carcinoma	G2	2012		-21778	Alive	WITH TUMOR	850	NA		Distant Metastasis	Oral Cavity	R Floor of Mouth	849	Complete Remission/Response			0	850	0	850	NA	NA	1	849
TCGA-CN-6022	HNSC	49	MALE	WHITE	Stage IVA	Head & Neck Squamous Cell Carcinoma	G3	2010		-17971	Dead	WITH TUMOR	NA	281			Cervical Lymph Nodes		101	Progressive Disease			1	281	1	281	NA	NA	1	101
TCGA-CN-5359	HNSC	59	MALE	WHITE	Stage IVA	Head & Neck Squamous Cell Carcinoma	G2	2009		-21858	Dead	WITH TUMOR	NA	377			Distant Metastasis	LUNG, BONES, THUMB	356	Complete Remission/Response			1	377	1	377	NA	NA	1	356
TCGA-CN-6024	HNSC	66	MALE	WHITE	Stage IVA	Head & Neck Squamous Cell Carcinoma	G2	2010		-24259	Dead	WITH TUMOR	NA	337			Cervical Lymph Nodes		156	Progressive Disease			1	337	1	337	NA	NA	1	156
TCGA-D6-6515	HNSC	82	FEMALE	WHITE	Stage II	Head & Neck Squamous Cell Carcinoma	G3	2010		-30099	Dead	TUMOR FREE	NA	403			Cervical Lymph Nodes		195	Complete Remission/Response			1	403	0	403	1	195	1	195
TCGA-CQ-A4C7	HNSC	88	MALE	WHITE	Stage II	Head & Neck Squamous Cell Carcinoma	G3	2010		-32194	Dead		NA	353			Oral Cavity	left lateral flap margins overlying reconstructed mandible	207	Complete Remission/Response			1	353	NA	353	1	207	1	207
TCGA-HD-A634	HNSC	56	MALE	WHITE	Stage III	Head & Neck Squamous Cell Carcinoma	G3	2013		-20810	Dead	WITH TUMOR	NA	130					NA				1	130	1	130	NA	NA	1	130
TCGA-CV-7415	HNSC	60	MALE	WHITE	Stage III	Head & Neck Squamous Cell Carcinoma	G2	1995		-22062	Dead	WITH TUMOR	NA	695					NA				1	695	1	695	NA	NA	1	695
TCGA-F7-A620	HNSC	47	MALE	WHITE		Head & Neck Squamous Cell Carcinoma	G1	2012		-17475	Alive	TUMOR FREE	543	NA					NA	Complete Remission/Response			0	543	0	543	0	543	0	543
TCGA-BA-A4IF	HNSC	59	MALE	WHITE	Stage IVA	Head & Neck Squamous Cell Carcinoma	G2	2011		-21635	Alive	TUMOR FREE	895	NA		New Primary Tumor		LUL Lung	463	Complete Remission/Response			0	895	0	895	NA	NA	1	463
TCGA-CN-A63T	HNSC	60	MALE	WHITE	Stage IVA	Head & Neck Squamous Cell Carcinoma	G3	2011		-22201	Alive	TUMOR FREE	225	NA					NA	Complete Remission/Response			0	225	0	225	NA	NA	0	225
TCGA-CV-6937	HNSC	71	MALE	WHITE	Stage II	Head & Neck Squamous Cell Carcinoma	G2	2003		-26156	Dead	TUMOR FREE	NA	624					NA				1	624	0	624	NA	NA	0	624
TCGA-CV-A468	HNSC	42	MALE		Stage III	Head & Neck Squamous Cell Carcinoma	G2	2001		-15372	Dead	TUMOR FREE	NA	464					NA	Complete Remission/Response			1	464	0	464	NA	NA	0	464
TCGA-CR-7399	HNSC	60	FEMALE	WHITE	Stage IVA	Head & Neck Squamous Cell Carcinoma	G3	2008		-22182	Alive	TUMOR FREE	181	NA					NA	Complete Remission/Response			0	181	0	181	NA	NA	0	181
TCGA-CV-7236	HNSC	77	FEMALE	WHITE	Stage IVA	Head & Neck Squamous Cell Carcinoma	G3	2007		-28250	Dead	TUMOR FREE	NA	144					NA				1	144	0	144	NA	NA	0	144
TCGA-CV-7247	HNSC	55	MALE	WHITE	Stage II	Head & Neck Squamous Cell Carcinoma	G2	1995		-20433	Dead	WITH TUMOR	NA	577					NA				1	577	1	577	NA	NA	1	577
TCGA-T3-A92N	HNSC	79	MALE	BLACK OR AFRICAN AMERICAN	Stage IVC	Head & Neck Squamous Cell Carcinoma	G3	2013		-28879	Dead	WITH TUMOR	NA	95		Distant Metastasis	Distant Metastasis	Lung	46	Progressive Disease			1	95	1	95	NA	NA	1	46
TCGA-CQ-5326	HNSC	67	MALE	WHITE	Stage IVA	Head & Neck Squamous Cell Carcinoma	G3	2007		-24473	Dead	WITH TUMOR	NA	89					NA	Progressive Disease			1	89	1	89	NA	NA	1	89
TCGA-CV-7410	HNSC	61	MALE	WHITE	Stage II	Head & Neck Squamous Cell Carcinoma	GX	1993		-22302	Dead	WITH TUMOR	NA	6417					NA				1	6417	1	6417	NA	NA	1	6417
TCGA-CV-A463	HNSC	82	FEMALE	WHITE	Stage IVA	Head & Neck Squamous Cell Carcinoma	G2	2007		-30095	Dead	TUMOR FREE	NA	23					NA	Complete Remission/Response			1	23	0	23	NA	NA	0	23
TCGA-CV-6936	HNSC	68	MALE	WHITE	Stage IVA	Head & Neck Squamous Cell Carcinoma	G2	2004		-25020	Dead	WITH TUMOR	NA	166		Locoregional Recurrence	Oral Cavity	mandibular	157	Progressive Disease			1	166	1	166	NA	NA	1	157
TCGA-CX-7219	HNSC	47	MALE	BLACK OR AFRICAN AMERICAN	Stage IVA	Head & Neck Squamous Cell Carcinoma	G2	2009		-17222	Alive	TUMOR FREE	1045	NA					NA	Complete Remission/Response			0	1045	0	1045	NA	NA	0	1045
TCGA-CV-7406	HNSC	49	MALE	WHITE	Stage II	Head & Neck Squamous Cell Carcinoma	GX	1999		-18250	Dead		NA	1748					NA				1	1748	NA	1748	NA	NA	0	1748
TCGA-CN-6021	HNSC	63	FEMALE	WHITE	Stage III	Head & Neck Squamous Cell Carcinoma	G2	2010		-23212	Dead	WITH TUMOR	NA	276					NA	Progressive Disease			1	276	1	276	NA	NA	1	276
TCGA-D6-6823	HNSC	50	MALE	WHITE	Stage III	Head & Neck Squamous Cell Carcinoma	G2	2010		-18611	Alive	TUMOR FREE	701	NA					NA	Complete Remission/Response			0	701	0	701	0	701	0	701
TCGA-RS-A6TO	HNSC	82	FEMALE	WHITE	Stage IVA	Head & Neck Squamous Cell Carcinoma	G2	2013		-30104	Dead	WITH TUMOR	NA	387		Locoregional Recurrence	Oral Cavity	L floor of mouth	338	Complete Remission/Response			1	387	1	387	NA	NA	1	338
TCGA-CR-5247	HNSC	48	MALE	BLACK OR AFRICAN AMERICAN	Stage III	Head & Neck Squamous Cell Carcinoma	G2	2006		-17810	Alive	TUMOR FREE	358	NA					NA	Complete Remission/Response			0	358	0	358	0	358	0	358
TCGA-CV-7238	HNSC	69	FEMALE	WHITE	Stage II	Head & Neck Squamous Cell Carcinoma	G2	2007		-25471	Alive	TUMOR FREE	2727	NA					NA	Complete Remission/Response			0	2727	0	2727	0	2727	0	2727
TCGA-TN-A7HI	HNSC	56	MALE	WHITE	Stage I	Head & Neck Squamous Cell Carcinoma	G3	2013		-20666	Alive	TUMOR FREE	412	NA					NA	Complete Remission/Response			0	412	0	412	NA	NA	0	412
TCGA-CV-6935	HNSC	67	MALE	WHITE	Stage III	Head & Neck Squamous Cell Carcinoma	G3	1999		-24799	Dead	WITH TUMOR	NA	295					NA				1	295	1	295	NA	NA	1	295
TCGA-RS-A6TP	HNSC	58	MALE	WHITE	Stage II	Head & Neck Squamous Cell Carcinoma	G3	2013		-21393	Alive	TUMOR FREE	516	NA					NA	Complete Remission/Response			0	516	0	516	0	516	0	516
TCGA-IQ-7632	HNSC	68	FEMALE	WHITE	Stage IVA	Head & Neck Squamous Cell Carcinoma	G1	2011		-24986	Alive	TUMOR FREE	441	NA					NA	Complete Remission/Response			0	441	0	441	NA	NA	0	441
TCGA-UF-A71E	HNSC	63	MALE	WHITE	Stage IVA	Head & Neck Squamous Cell Carcinoma Basaloid Type	G3	2010		-23071	Dead	TUMOR FREE	NA	1504					NA	Complete Remission/Response			1	1504	0	1504	NA	NA	0	1504
TCGA-CV-5441	HNSC	58	MALE	WHITE	Stage IVA	Head & Neck Squamous Cell Carcinoma	G3	2003		-21305	Alive	TUMOR FREE	2886	NA					NA	Complete Remission/Response			0	2886	0	2886	NA	NA	0	2886
TCGA-CN-A6V7	HNSC	40	MALE	WHITE	Stage IVA	Head & Neck Squamous Cell Carcinoma	GX	2013		-14895	Alive	TUMOR FREE	594	NA					NA	Complete Remission/Response			0	594	0	594	NA	NA	0	594
TCGA-P3-A6T3	HNSC	49	MALE	WHITE	Stage IVA	Head & Neck Squamous Cell Carcinoma	G2	2008		-18143	Dead	WITH TUMOR	NA	577		Distant Metastasis	Distant Metastasis	Lung	242	Complete Remission/Response			1	577	1	577	NA	NA	1	242
TCGA-F7-A622	HNSC	75	MALE	WHITE		Head & Neck Squamous Cell Carcinoma	G1	2012		-27456	Dead	WITH TUMOR	NA	359					NA	Complete Remission/Response			1	359	1	359	NA	NA	1	359
TCGA-UF-A7JK	HNSC	59	MALE		Stage IVA	Head & Neck Squamous Cell Carcinoma	G2	2010		-21696	Dead	WITH TUMOR	NA	424			Larynx		341	Complete Remission/Response			1	424	1	424	NA	NA	1	341
TCGA-T2-A6X0	HNSC	49	MALE	WHITE	Stage IVA	Head & Neck Squamous Cell Carcinoma	G2	2012		-18114	Alive	TUMOR FREE	216	NA					NA	Complete Remission/Response			0	216	0	216	NA	NA	0	216
TCGA-BA-A6DL	HNSC	59	MALE	WHITE	Stage III	Head & Neck Squamous Cell Carcinoma	G2	2012		-21886	Alive	TUMOR FREE	623	NA					NA	Complete Remission/Response			0	623	0	623	0	623	0	623
TCGA-CV-6955	HNSC	74	FEMALE	WHITE	Stage II	Head & Neck Squamous Cell Carcinoma	G3	2000		-27261	Dead	WITH TUMOR	NA	334					NA				1	334	1	334	NA	NA	1	334
TCGA-D6-A6EO	HNSC	44	MALE	WHITE	Stage IVA	Head & Neck Squamous Cell Carcinoma	G2	2013		-16185	Alive	TUMOR FREE	759	NA					NA	Stable Disease			0	759	0	759	NA	NA	0	759
TCGA-KU-A66T	HNSC	53	FEMALE	WHITE	Stage IVA	Head & Neck Squamous Cell Carcinoma	G2	2012		-19405	Alive	TUMOR FREE	552	NA		Locoregional Recurrence	Oral Cavity	Toungue	552	Complete Remission/Response			0	552	0	552	NA	NA	1	552
TCGA-CN-5369	HNSC	90	FEMALE	WHITE	Stage IVA	Head & Neck Squamous Cell Carcinoma	G3	2006		-32871	Dead	TUMOR FREE	NA	380					NA	Complete Remission/Response			1	380	0	380	NA	NA	0	380
TCGA-KU-A6H7	HNSC	55	FEMALE	WHITE	Stage IVA	Head & Neck Squamous Cell Carcinoma	G2	2013		-20314	Alive	TUMOR FREE	586	NA					NA	Complete Remission/Response			0	586	0	586	NA	NA	0	586
TCGA-CQ-A4CE	HNSC	76	FEMALE	[Not Evaluated]	Stage II	Head & Neck Squamous Cell Carcinoma	G2	2011		-27793	Alive	TUMOR FREE	897	NA					NA	Complete Remission/Response			0	897	0	897	0	897	0	897
TCGA-CN-5367	HNSC	60	FEMALE	WHITE	Stage IVA	Head & Neck Squamous Cell Carcinoma	G2	2006		-22246	Dead	TUMOR FREE	NA	352					NA	Complete Remission/Response			1	352	0	352	NA	NA	0	352
TCGA-CN-4726	HNSC	68	MALE	WHITE	Stage IVA	Head & Neck Squamous Cell Carcinoma	G2	2010		-25194	Dead	WITH TUMOR	NA	142			Distant Metastasis	SKIN NECK	79	Progressive Disease			1	142	1	142	NA	NA	1	79
TCGA-CQ-A4CB	HNSC	59	MALE	[Not Evaluated]	Stage II	Head & Neck Squamous Cell Carcinoma	G2	2011		-21574	Alive	TUMOR FREE	893	NA					NA	Complete Remission/Response			0	893	0	893	0	893	0	893
TCGA-HD-8314	HNSC	58	MALE	WHITE	Stage III	Head & Neck Squamous Cell Carcinoma Basaloid Type	G4	2012		-21517	Alive	TUMOR FREE	670	NA					NA	Complete Remission/Response			0	670	0	670	0	670	0	670
TCGA-BB-4224	HNSC	52	MALE	WHITE	Stage III	Head & Neck Squamous Cell Carcinoma	G2	2004		-19119	Alive	WITH TUMOR	278	NA			Oral Cavity		175	Progressive Disease			0	278	0	278	NA	NA	1	175
TCGA-CN-5361	HNSC	80	MALE	WHITE		Head & Neck Squamous Cell Carcinoma	G2	2007		-29383	Dead	TUMOR FREE	NA	2120		New Primary Tumor			2062	Complete Remission/Response			1	2120	0	2120	NA	NA	1	2062
TCGA-CV-A45W	HNSC	75	MALE	WHITE	Stage III	Head & Neck Squamous Cell Carcinoma	G2	1999		-27743	Dead	TUMOR FREE	NA	1398					NA				1	1398	0	1398	NA	NA	0	1398
TCGA-CV-7242	HNSC	60	FEMALE	WHITE	Stage III	Head & Neck Squamous Cell Carcinoma	G2	2008		-22136	Alive	TUMOR FREE	1095	NA					NA				0	1095	0	1095	NA	NA	0	1095
TCGA-QK-A8Z9	HNSC	56	MALE	BLACK OR AFRICAN AMERICAN	Stage IVA	Head & Neck Squamous Cell Carcinoma	G2	2013		-20471	Dead	WITH TUMOR	NA	449		Distant Metastasis	Distant Metastasis	esophagus	205	Complete Remission/Response			1	449	1	449	NA	NA	1	205
TCGA-CV-5440	HNSC	52	MALE	WHITE	Stage IVA	Head & Neck Squamous Cell Carcinoma	G3	2002		-19197	Alive	TUMOR FREE	3270	NA					NA	Complete Remission/Response			0	3270	0	3270	NA	NA	0	3270
TCGA-CV-7178	HNSC	64	FEMALE	WHITE	Stage IVA	Head & Neck Squamous Cell Carcinoma	G3	2000		-23430	Dead	WITH TUMOR	NA	2166					NA				1	2166	1	2166	NA	NA	1	2166
TCGA-F7-A624	HNSC	73	MALE	WHITE		Head & Neck Squamous Cell Carcinoma	G3	2012		-26667	Alive	TUMOR FREE	378	NA					NA	Complete Remission/Response			0	378	0	378	0	378	0	378
TCGA-CN-6013	HNSC	56	MALE	WHITE	Stage IVA	Head & Neck Squamous Cell Carcinoma	G3	2010		-20703	Dead	WITH TUMOR	NA	727			Distant Metastasis	LUNG	323	Complete Remission/Response			1	727	1	727	NA	NA	1	323
TCGA-CR-7369	HNSC	59	MALE	WHITE	Stage IVA	Head & Neck Squamous Cell Carcinoma	G2	2008		-21897	Dead	TUMOR FREE	NA	1090					NA	Complete Remission/Response			1	1090	0	1090	NA	NA	0	1090
TCGA-CV-7103	HNSC	49	MALE	WHITE	Stage II	Head & Neck Squamous Cell Carcinoma	G2	2000		-18219	Dead	WITH TUMOR	NA	1591					NA				1	1591	1	1591	NA	NA	1	1591
TCGA-CV-7102	HNSC	76	FEMALE	WHITE	Stage III	Head & Neck Squamous Cell Carcinoma	G3	2000		-27805	Dead		NA	56					NA	Complete Remission/Response			1	56	NA	56	NA	NA	0	56
TCGA-CN-6023	HNSC	73	MALE	WHITE	Stage IVA	Head & Neck Squamous Cell Carcinoma	GX	2010		-26769	Alive	TUMOR FREE	1584	NA					NA	Complete Remission/Response			0	1584	0	1584	NA	NA	0	1584
TCGA-CN-5360	HNSC	68	MALE	WHITE	Stage IVA	Head & Neck Squamous Cell Carcinoma	G2	2008		-25034	Alive	TUMOR FREE	2169	NA					NA	Complete Remission/Response			0	2169	0	2169	NA	NA	0	2169
TCGA-BB-A6UM	HNSC	52	MALE	WHITE	Stage III	Head & Neck Squamous Cell Carcinoma	GX	2010		-19194	Alive	TUMOR FREE	393	NA					NA	Complete Remission/Response			0	393	0	393	0	393	0	393
TCGA-CN-6017	HNSC	55	MALE	WHITE	Stage III	Head & Neck Squamous Cell Carcinoma	G2	2010		-20358	Dead	TUMOR FREE	NA	853					NA	Complete Remission/Response			1	853	0	853	NA	NA	0	853
TCGA-CQ-6228	HNSC	71	FEMALE	WHITE	Stage III	Head & Neck Squamous Cell Carcinoma	G2	2009		-25942	Dead		NA	456			Distant Metastasis	left axilla	273	Complete Remission/Response			1	456	NA	456	NA	NA	1	273
TCGA-CV-6956	HNSC	67	MALE	WHITE	Stage IVA	Head & Neck Squamous Cell Carcinoma	G2	1993		-24720	Dead	WITH TUMOR	NA	217					NA	Complete Remission/Response			1	217	1	217	NA	NA	1	217
TCGA-HD-7754	HNSC	69	MALE	WHITE	Stage IVA	Head & Neck Squamous Cell Carcinoma	G1	2011		-25365	Alive	TUMOR FREE	783	NA					NA	Complete Remission/Response			0	783	0	783	NA	NA	0	783
TCGA-CN-5374	HNSC	56	FEMALE	WHITE	Stage IVA	Head & Neck Squamous Cell Carcinoma	G3	2007		-20464	Dead	TUMOR FREE	NA	1732			Distant Metastasis	lung	1369	Complete Remission/Response			1	1732	0	1732	NA	NA	1	1369
TCGA-BA-5558	HNSC	65	MALE	WHITE	Stage IVA	Head & Neck Squamous Cell Carcinoma	G1	2006		-23984	Alive	TUMOR FREE	1995	NA					NA	Complete Remission/Response			0	1995	0	1995	NA	NA	0	1995
TCGA-CN-A63V	HNSC	59	MALE	WHITE	Stage IVA	Head & Neck Squamous Cell Carcinoma	G2	2011		-21734	Alive	TUMOR FREE	679	NA					NA	Complete Remission/Response			0	679	0	679	NA	NA	0	679
TCGA-CV-5979	HNSC	26	MALE	WHITE	Stage III	Head & Neck Squamous Cell Carcinoma	G2	2007		-9567	Alive	TUMOR FREE	1315	NA					NA	Complete Remission/Response			0	1315	0	1315	NA	NA	0	1315
TCGA-CV-A45R	HNSC	46	MALE	WHITE	Stage III	Head & Neck Squamous Cell Carcinoma	G1	1997		-17125	Alive	TUMOR FREE	5480	NA					NA	Complete Remission/Response			0	5480	0	5480	0	5480	0	5480
TCGA-BB-4217	HNSC	68	MALE	BLACK OR AFRICAN AMERICAN	Stage IVA	Head & Neck Squamous Cell Carcinoma	G3	2008		-25020	Alive	WITH TUMOR	187	NA					NA	Partial Remission/Response			0	187	0	187	NA	NA	0	187
TCGA-UF-A7JD	HNSC	71	MALE		Stage IVA	Head & Neck Squamous Cell Carcinoma	G3	2012		-26101	Dead	TUMOR FREE	NA	739					NA	Complete Remission/Response			1	739	0	739	NA	NA	0	739
TCGA-CR-6474	HNSC	51	MALE	WHITE	Stage IVA	Head & Neck Squamous Cell Carcinoma	G2	2009		-18840	Dead	WITH TUMOR	NA	564			Cervical Lymph Nodes	Right neck	220	Complete Remission/Response			1	564	1	564	NA	NA	1	220
TCGA-CN-6997	HNSC	66	MALE	WHITE	Stage IVA	Head & Neck Squamous Cell Carcinoma	G3	2011		-24298	Dead	TUMOR FREE	NA	988			Distant Metastasis	LUNG	279	Complete Remission/Response			1	988	0	988	NA	NA	1	279
TCGA-CV-A6K1	HNSC	65	MALE	WHITE	Stage IVA	Head & Neck Squamous Cell Carcinoma	G2	2011		-23848	Alive	TUMOR FREE	685	NA		New Primary Tumor	Oral Cavity	Tonsil	401	Complete Remission/Response			0	685	0	685	NA	NA	1	401
TCGA-CV-7097	HNSC	53	MALE	WHITE	Stage III	Head & Neck Squamous Cell Carcinoma	G3	2002		-19382	Dead	WITH TUMOR	NA	385					NA				1	385	1	385	NA	NA	1	385
TCGA-MT-A67A	HNSC	85	FEMALE	WHITE	Stage I	Head & Neck Squamous Cell Carcinoma	G2	2011		-31161	Alive	TUMOR FREE	914	NA					NA	Complete Remission/Response			0	914	0	914	0	914	0	914
TCGA-MZ-A6I9	HNSC	68	MALE	WHITE	Stage IVA	Head & Neck Squamous Cell Carcinoma	G2	2012		-24939	Dead	WITH TUMOR	NA	489		Distant Metastasis	Distant Metastasis	lung, mediastinal lymph node	246				1	489	1	489	NA	NA	1	246
TCGA-CN-A6V3	HNSC	61	MALE	WHITE	Stage IVA	Head & Neck Squamous Cell Carcinoma	G3	2012		-22397	Alive	TUMOR FREE	742	NA					NA	Complete Remission/Response			0	742	0	742	NA	NA	0	742
TCGA-CV-7416	HNSC	29	FEMALE	WHITE	Stage IVA	Head & Neck Squamous Cell Carcinoma	GX	1994		-10936	Dead		NA	763					NA				1	763	NA	763	NA	NA	0	763
TCGA-CQ-A4C6	HNSC	63	MALE	ASIAN	Stage II	Head & Neck Squamous Cell Carcinoma	G2	2010		-23205	Alive	TUMOR FREE	1353	NA					NA	Complete Remission/Response			0	1353	0	1353	0	1353	0	1353
TCGA-UF-A7JV	HNSC	62	FEMALE	WHITE	Stage IVA	Head & Neck Squamous Cell Carcinoma	G2	2011		-22985	Dead	WITH TUMOR	NA	90			Oropharynx	Oropharynx and cervical lymph node	55	Complete Remission/Response			1	90	1	90	NA	NA	1	55
TCGA-D6-6516	HNSC	69	MALE	WHITE	Stage III	Head & Neck Squamous Cell Carcinoma	G2	2010		-25242	Alive	TUMOR FREE	773	NA					NA	Complete Remission/Response			0	773	0	773	0	773	0	773
TCGA-CN-A498	HNSC	61	FEMALE	WHITE	Stage II	Head & Neck Squamous Cell Carcinoma	G1	2011		-22330	Dead	WITH TUMOR	NA	773		Locoregional Recurrence	Oral Cavity	tongue, r neck nodes	186	Complete Remission/Response			1	773	1	773	1	186	1	186
TCGA-UF-A7JA	HNSC	66	FEMALE	WHITE	Stage IVA	Head & Neck Squamous Cell Carcinoma	G2	2008		-24121	Alive	TUMOR FREE	2265	NA					NA	Complete Remission/Response			0	2265	0	2265	NA	NA	0	2265
TCGA-CN-A49A	HNSC	60	MALE	WHITE	Stage IVA	Head & Neck Squamous Cell Carcinoma	G2	2011		-21995	Dead	WITH TUMOR	NA	526		Distant Metastasis	Distant Metastasis	spine	344	Complete Remission/Response			1	526	1	526	NA	NA	1	344
TCGA-CV-A6JT	HNSC	65	MALE	WHITE	Stage II	Head & Neck Squamous Cell Carcinoma	G2	2011		-23806	Alive	TUMOR FREE	852	NA					NA	Complete Remission/Response			0	852	0	852	0	852	0	852
TCGA-CN-A641	HNSC	47	MALE	WHITE	Stage IVA	Head & Neck Squamous Cell Carcinoma	G2	2012		-17454	Alive	TUMOR FREE	367	NA					NA	Complete Remission/Response			0	367	0	367	NA	NA	0	367
