# Supplementary material for: Six-gene signature for predicting survival in patients with head and neck squamous cell carcinoma
Source: Aging (Albany NY). 2020 Jan 12;12(1):767–83. doi: 10.18632/aging.102655 (PMC6977678; doi:10.18632/aging.102655)
Supplement: Supplementary Table 5 [file aging-12-102655-s007..xlsx]

## Sheet: 工作表 1 - 4404_1_supp_119012_q2fl
Supplement table 5：Infromation of test set
ENGSID	TCGA_4P_AA8J_01A	TCGA_BA_4074_01A	TCGA_BA_4075_01A	TCGA_BA_4076_01A	TCGA_BA_4077_01B	TCGA_BA_5152_01A	TCGA_BA_5153_01A	TCGA_BA_5555_01A	TCGA_BA_5557_01A	TCGA_BA_6868_01B	TCGA_BA_6869_01A	TCGA_BA_6870_01A	TCGA_BA_6871_01A	TCGA_BA_6872_01A	TCGA_BA_6873_01A	TCGA_BA_7269_01A	TCGA_BA_A4IG_01A	TCGA_BA_A4IH_01A	TCGA_BA_A6DA_01A	TCGA_BA_A6DB_01A	TCGA_BA_A6DE_01A	TCGA_BA_A6DJ_01A	TCGA_BA_A8YP_01A	TCGA_BB_4225_01A	TCGA_BB_4228_01A	TCGA_BB_8596_01A	TCGA_BB_8601_01A	TCGA_BB_A5HU_01A	TCGA_BB_A5HZ_01A	TCGA_BB_A6UO_01A	TCGA_C9_A47Z_01A	TCGA_CN_4723_01A	TCGA_CN_4725_01A	TCGA_CN_4727_01A	TCGA_CN_4728_01A	TCGA_CN_4729_01A	TCGA_CN_4734_01A	TCGA_CN_4737_01A	TCGA_CN_4738_01A	TCGA_CN_4740_01A	TCGA_CN_4741_01A	TCGA_CN_4742_01A	TCGA_CN_5355_01A	TCGA_CN_5356_01A	TCGA_CN_5358_01A	TCGA_CN_5363_01A	TCGA_CN_5364_01A	TCGA_CN_5366_01A	TCGA_CN_5370_01A
ENSG00000167578	3.06419	1.87124	1.45219	1.59712	1.91885	1.71811	2.18871	1.54661	1.45132	1.13014	2.24205	1.63734	1.49479	1.77192	1.22086	2.78008	1.94293	1.52155	2.07672	2.19714	1.7651	1.67781	1.86747	1.93806	1.37536	1.96722	1.56945	1.74076	1.47165	1.72184	1.32668	1.51238	1.06528	1.35496	1.73358	1.67436	1.21948	1.81669	1.582	1.48288	1.63964	1.36615	1.22276	1.16893	1.53525	1.18294	1.46661	1.67409	1.48636
ENSG00000078237	2.31842	3.63807	2.98702	2.73014	2.70504	2.44551	2.58322	2.80003	2.76012	2.36168	2.72214	2.11931	2.94469	2.13639	3.90579	1.92917	3.5673	2.86129	1.63916	2.832	2.22807	2.89792	3.33234	3.17348	2.36201	2.18307	2.56858	2.66946	3.07348	2.48793	2.71295	2.62878	3.31504	2.27322	2.58894	3.73708	3.30134	2.97515	3.02239	2.39234	3.19084	2.4603	2.5139	2.87896	2.78272	2.29069	2.12121	3.11797	2.87083
ENSG00000146083	3.33551	1.27035	2.50116	3.39389	3.30226	2.99642	5.52532	3.43302	3.04751	4.16177	4.23239	3.75722	4.84583	2.79041	3.33537	1.84589	3.80789	4.2605	1.55259	3.22187	3.28391	3.35918	3.71899	4.3097	4.20666	3.44577	2.84587	3.34789	3.51807	3.21332	3.33786	3.49379	3.25856	3.19597	3.47803	3.39046	2.76879	3.71192	4.08147	2.97588	4.05231	2.83792	3.24062	3.15288	3.51566	4.5092	2.58575	2.88818	3.76295
ENSG00000158486	0.12517	0.137434	0.156048	0.0935377	0.156621	0.168513	0.0198322	0.308145	0.125568	0.104651	0.159818	0.122047	0.143619	0.0735778	0.117571	0.108886	0.211916	0.116181	0.0836219	0.0896754	0.386891	0.115057	0.304439	0.0828802	0.0291884	0.0707791	0.157693	0.0532469	0.305132	0.166418	0.177001	0.265022	0.180514	0.101585	0.0860184	0.319249	0.096109	0.409449	1.13866	0.208095	0.237954	0.0979934	0.270678	0.216716	0.24136	0.0537058	0.224669	0.102244	0.0266281
ENSG00000198242	7.40531	7.69711	7.31701	7.03126	6.18695	7.72151	6.16196	6.33537	6.45862	6.31993	7.51463	6.98331	10.0051	6.64012	6.67092	8.14241	6.73207	7.0072	7.26482	7.43233	6.60331	7.38011	6.87125	7.55276	7.70931	6.29377	8.10307	5.95533	7.82036	7.53006	6.42631	6.78331	6.36059	6.91114	6.66735	6.78093	6.55145	5.95282	6.32307	6.87766	5.95596	5.75286	6.79107	7.31131	6.23593	7.1462	7.12431	6.6574	6.80697
ENSG00000134108	4.15442	5.44164	6.12557	5.48939	5.74508	5.92036	5.2061	5.1673	5.86761	4.99085	4.81172	4.76227	4.62329	4.65316	5.48927	5.77934	6.52998	5.212	4.94771	4.97648	4.87076	5.60958	5.2317	5.16676	5.20063	4.96098	5.61609	5.0847	5.3961	4.50067	5.61843	4.71009	5.08568	5.8817	4.98523	4.84631	5.51175	5.27857	5.10657	4.8655	5.65221	5.16235	4.78657	4.96271	4.55669	5.33091	4.45198	4.88603	5.1461
ENSG00000172137	3.51933	6.07903	0.98476	7.91737	3.41792	1.43643	0.360322	3.91481	4.40493	1.19476	2.45647	0.524717	0.694344	1.37584	0.567258	4.88427	1.1061	1.54888	3.18318	2.20839	2.88366	0.253925	3.29062	0.0418061	1.15385	1.45937	3.31018	1.21481	6.18035	3.42835	3.15725	3.00531	1.31897	4.05406	2.96503	1.66264	1.56662	3.54882	0.559684	3.05635	2.30878	2.35808	1.98294	2.00335	2.14075	0.387909	1.10588	1.55358	2.26556
ENSG00000167700	5.21625	3.31292	3.89291	3.07894	2.41192	3.8895	2.07666	3.59177	3.15834	4.86902	3.25846	4.50717	5.27993	4.10244	4.53754	4.13055	3.47692	2.53547	4.62526	3.32146	3.88733	3.69494	3.64681	3.78077	3.81982	3.03656	3.60408	3.96384	4.75541	4.17977	3.64244	3.33463	2.89376	2.93001	2.35904	2.66604	3.21983	3.23412	3.49442	3.67353	2.54611	3.11266	4.36994	4.04198	1.92677	3.33395	2.58927	3.79256	3.11741
ENSG00000060642	2.34956	2.08103	3.10087	3.27701	2.13148	2.24231	2.54184	2.82578	2.13005	2.26573	2.51799	2.48824	2.02498	2.5923	2.38118	1.54607	3.22634	2.44805	1.19269	2.69096	2.87475	1.80911	1.92156	2.82475	2.99009	2.94937	2.86706	2.45822	2.72982	1.88362	2.32886	2.45513	3.27344	2.51546	2.22627	1.53852	2.06704	3.14261	3.08609	2.70614	2.67761	2.11159	2.0557	2.12691	2.28039	2.62377	2.28781	3.03476	1.76433
ENSG00000182141	0.643491	1.25193	0.948086	1.09182	0.163056	0.269594	0.554719	0.856356	0.183824	0.501795	0.68062	1.18639	1.12007	0.12817	0.931848	0.402077	0.911843	0.287585	0.0735415	0.685629	1.23584	0.26945	1.40647	0.788624	0.680247	0.833719	1.52235	0.755162	0.342225	0.290882	0.475081	0.691667	0.518739	0.79535	0.608104	0.190862	0.179288	0.857772	0.586261	0.406179	0.794944	0.422843	0.560954	0.764001	0.887421	0.43955	0.311063	0.385742	0.610258
ENSG00000185105	0.39058	0.00817857	0.0362367	0.01246	0	0.026615	0.0134413	0.0423915	0.00788418	0.0826166	0.0576123	0.0462289	0.0305676	0.0134497	0.380116	0.209979	0	0.0208868	0.0168044	1.46765	0.126915	0.0100889	0.228849	0.0290934	0.0105179	0.345654	0.03235	0.0198703	0.01271	0	0.499206	0.0278353	1.63558	0	0.332126	0.0481686	0	1.3611	0.00925916	0.668545	0.0327729	0.0161496	0.175671	0.0228963	0.740575	0.309626	0.44608	0.0236882	0.996126
ENSG00000102174	0.616275	0.932354	0.304557	0.822226	1.43043	0.217966	0.212351	1.37751	0.486331	0.186372	0.323066	0.308255	0.133402	0.303816	0.276679	0.530262	0.390105	0.203639	0.177367	0.802607	0.96973	0.123222	0.10462	0.190524	0.124529	0.708835	0.0855842	0.985375	0.575902	0.333572	1.41677	0.313275	0.357169	0.719138	0.245493	0.310955	0.4483	0.832546	0.307995	0.435117	0.344622	0.331001	0.355239	0.40309	0.400599	0.421213	0.311715	0.510899	0.58117
ENSG00000166391	0.042338	0.0193526	0.042939	0	0.127113	0.0158648	0.601188	0.0746781	0.00468732	0.0116059	0.122627	0.0230632	0.0451526	0.0473619	0.0453975	0.0121514	0.0265848	0.0247744	0.0100031	0.151051	0	0	0	0.117272	1.12848	0.206374	0	0.0525016	0.0225666	0.112911	0.248236	0.0438361	0.0472996	0	0.00614766	0	0.0845539	0.0766089	0.0699873	0.0204678	0.0340445	0.00961247	0	0.0136411	0.0730849	0	0.010485	0	0.0305812
ENSG00000070087	3.18103	4.64966	6.78483	6.92642	6.6277	3.28945	2.785	6.64442	3.75137	5.98651	6.17319	1.64567	3.82363	5.2965	6.56652	6.84737	5.32688	5.73418	5.7328	4.36659	6.23914	5.26818	6.26076	4.3407	4.31168	6.23424	6.18964	6.00689	4.35796	3.25121	5.25634	6.55095	3.71106	6.77814	4.91252	3.45877	5.25335	4.19301	3.75733	4.06106	4.74946	5.21785	2.50868	3.85147	3.36095	5.92456	2.56002	3.28242	5.53983
ENSG00000153561	2.28919	2.10516	2.3994	3.00288	3.20392	3.42625	3.86392	4.04265	2.90101	2.59482	2.76011	2.78728	3.67449	2.3584	2.83065	2.75101	3.66204	4.01147	1.87106	3.04937	3.68023	2.52633	4.19537	3.72823	3.95334	2.92591	3.18488	2.79482	3.38315	2.32314	3.13634	3.10013	3.74026	2.98952	3.99665	3.69256	2.59882	3.7426	3.49967	3.68799	4.24457	3.75629	3.34739	3.97323	3.73583	2.87595	3.69183	3.02871	3.21863
ENSG00000179262	5.69701	5.42113	5.49332	6.02558	5.95126	4.84579	5.49772	5.42273	4.81468	5.0355	5.42909	5.16368	6.32515	5.13015	6.37415	4.00154	6.0158	6.06711	4.36885	5.53275	6.01089	5.25669	5.89129	6.00643	5.73198	5.38276	6.73399	5.38438	5.81038	5.77107	4.88789	5.33671	5.17281	6.03286	5.56965	4.55065	4.83186	5.38917	5.09524	5.46049	5.80439	4.47257	5.63776	5.04039	5.05826	5.1847	5.58586	5.37786	4.90076
ENSG00000166368	0	0	0	0	0	0	0	0.0189283	0	0	0	0.0172346	0.0170023	0	0	0	0	0	0	0	0	0	0	0	0	0	0.0357754	0.0436389	0	0	0	0.0609322	0	0	0	0.0427468	0.0201529	0	0	0	0	0	0.0205373	0	0	0	0	0	0
ENSG00000206072	0	0.0108681	0	0.134965	0.710229	1.65178	0.741837	0.167298	0.646045	0.00867346	1.1383	0.134154	0.0355142	0.0442469	0	0.191665	1.09077	0.373841	2.20644	0.518664	0.0677077	1.3289	0.801643	0.0884417	0.250695	1.62399	1.58047	0.00663774	0.2054	0.0093641	2.66877	0.159116	0.48232	0.0419831	1.4795	0.361205	0.00608205	0.185758	2.48622	0.0229017	1.05733	0.0530166	0.207904	1.48254	0.820644	0.00817964	1.41928	0.036594	0.198338
ENSG00000127511	2.26819	1.97958	1.98062	2.91163	2.40008	2.22893	2.28909	2.7316	2.08967	3.05009	2.99998	3.42461	2.95663	3.01614	3.2991	1.8346	2.6181	2.62629	1.84085	2.39874	3.06534	2.56346	3.60768	2.82247	2.94997	2.85929	2.65015	3.15155	3.81425	3.12554	2.90334	3.37678	2.9319	2.50533	2.65264	2.22933	2.68231	3.36235	2.80864	2.21471	3.02431	2.37784	2.98368	2.96055	2.93872	2.55747	2.08355	2.74105	2.55644
ENSG00000095587	0.578213	0.314338	0.17356	0.190613	0.469424	0.233229	0.00406654	0.0509811	0.112329	0.232654	0.435308	0.100317	0.185515	0.537956	0.171995	0.315934	0.0236483	0.284137	0.0252632	0.123902	0.0859716	0.111587	0.160679	0.448353	0.148113	0.27008	0.154236	0.0620004	0.114662	0.12245	0.0382826	0.195234	0.380238	0.503597	0.125749	0.446191	0.0273754	0.27226	0.283875	0.132426	0.0515473	0.110729	0.0979984	0.0434179	0.694111	0.0221463	0.206282	0.0816713	0.397295
ENSG00000064601	5.39823	4.01944	4.49039	4.53026	4.72008	4.76153	5.11614	5.42299	5.26476	4.88033	5.137	5.36087	4.62984	5.05491	4.89171	5.31358	4.87999	4.36669	4.45222	5.05331	5.13684	4.88228	4.4257	4.93593	4.15255	5.27747	3.60183	5.17862	4.86909	4.62078	4.713	4.73201	4.68047	3.95724	5.08047	4.20723	4.1597	5.03537	4.50951	5.12472	4.69226	5.72325	4.28148	4.064	5.11995	5.29557	4.55734	5.11008	5.41086
ENSG00000008517	6.29886	6.05834	6.02326	3.85672	6.8362	5.90744	4.84893	4.97589	3.18136	6.11093	4.40254	3.68853	5.66062	3.22841	4.46183	4.48397	3.51913	4.95017	3.02086	5.81421	4.02944	6.19305	3.1874	5.35944	5.67999	3.93626	1.21957	4.43598	3.84187	4.75703	3.19326	4.02417	3.71054	4.02596	4.70138	3.78171	4.95	4.5548	2.76758	4.49995	3.84333	4.75426	3.05398	3.61454	4.92259	3.60783	4.55339	4.37695	5.63655
ENSG00000088179	0.723837	1.16063	1.12766	1.72251	1.0091	1.52119	1.62225	1.43235	0.595824	0.829009	0.939861	0.748019	1.26214	1.12802	1.18373	0.560962	1.29751	1.62959	0.814603	1.07131	1.3638	1.17451	1.92465	1.23272	1.53459	1.01404	1.04749	0.84026	1.57477	0.965115	1.2454	1.00621	1.62532	2.14782	0.830715	1.30476	1.19334	1.55232	1.17869	0.952669	1.36658	0.952463	1.10154	1.30368	1.30026	1.36665	0.950181	0.937934	1.34601
ENSG00000070081	2.74903	2.81654	2.66298	2.75444	2.78867	2.43359	2.75817	1.98356	2.11995	3.13607	2.24963	2.12204	2.09706	1.6281	1.86584	2.20655	2.96964	3.57855	1.8896	2.91198	2.39041	1.77887	2.97615	2.67839	2.31874	2.94425	2.35811	2.23577	1.92696	1.95669	1.61778	2.8348	1.82384	1.37398	2.45162	2.27419	1.7592	2.24716	2.57229	2.31881	2.50447	2.8848	2.6696	2.15444	3.03407	2.17805	2.21411	1.97562	2.577
ENSG00000166634	0.0811635	0	0	1.81521	0.629362	0.0631766	0.0758869	0.311363	0.31314	0.0972825	1.21354	0.129536	0.0582274	0.0759333	0.0295678	0.0580951	0.552674	0.534821	0.623687	1.17067	1.82857	0.147928	0.0215196	2.92011	2.01929	0.154705	1.3981	0.0749801	0.117822	0.0269166	0.881228	0.432647	0.0825348	0.048457	1.49854	2.11446	0.0348292	1.52807	0.260791	0.615569	3.32249	0.822609	2.0576	0.219207	4.08642	0	0.114608	0.0452199	0.590251
ENSG00000161558	1.74763	0.473939	0.754439	1.14389	1.21531	0.851028	1.87213	0.68704	0.544551	0.882113	1.07991	0.85677	1.28265	0.714325	1.00588	0.960459	2.01687	1.6353	0.449655	1.26737	1.37905	0.849312	1.44513	1.62245	1.2917	1.14005	1.06481	0.586863	0.532709	0.889002	0.862638	1.08203	0.916692	0.486497	1.06272	0.615558	0.419556	1.34772	1.24129	0.987486	1.50139	0.534635	0.93153	0.591134	1.17885	1.0831	1.28916	1.1627	0.865087
ENSG00000276644	0.11416	0.205379	0.128045	0.0669171	0.130037	0.259967	0.314239	0.145467	0.173091	0.0755517	0.0992746	0.109978	1.81755	0.0484825	0.0892764	0.155343	0.160719	1.55201	0.0380418	0.161805	0.112218	0.0543762	0.304765	0.090907	0.0612735	0.367276	0.960804	0.122418	0.185519	0.311698	0.0626334	0.13454	0.188561	0.226648	0.45137	0.396061	0.143143	0.227786	0.190253	0.36828	0.130033	0.134293	0.39614	0.347556	0.504936	0.199353	0.12755	0.138394	0.433217
ENSG00000268465	0	0	0	0	0	0	0	0	0	0	0	0	0	0	0	0	0	0	0.0908627	0	0	0	0	0.0533558	0	0	0	0	0	0	0	0	0	0	0	0	0	0	0	0	0.0452632	0	0	0	0	0	0	0	0
ENSG00000118972	0	0.00666451	0	0.0101561	0	0	0.0109567	0	0	0	0	0	0.0675854	0	0.0125948	0	0.0182824	0.0338692	0	0	0	0	0	0.00795653	0.0423597	0	0.0523292	0	0	0	0.00949391	0.037655	0	0	0.0168001	0	0	0.0178728	0.00754558	0.00705035	0.033358	0	0	0	0	0	0	0	0.00604275
ENSG00000179833	2.79274	2.02946	2.83829	4.29268	3.74369	3.68963	6.18948	3.91499	4.29582	4.14012	4.10108	3.62191	3.13062	3.10301	2.74106	2.8651	4.11956	4.12172	4.2146	3.20835	3.76541	2.97949	4.5035	4.28555	4.74477	4.05116	3.23742	3.84539	3.84058	3.1417	3.68614	4.12011	4.01874	4.74417	4.06906	4.10488	3.45351	3.85716	4.28763	3.27592	3.69885	4.63839	3.97821	4.06047	3.60015	3.06677	4.37459	3.29106	3.43167
ENSG00000064225	1.18785	1.33727	0.862848	0.968035	0.671567	0.641947	0.900862	0.474387	1.0202	0.636636	0.293512	0.804675	1.00022	0.889926	0.637391	0.607248	0.589743	1.91801	0.191531	1.03808	0.266442	0.346619	0.346916	0.491711	0.503449	1.90038	0.484288	1.07259	0.332767	1.25896	0.779192	0.589905	0.893433	0.174324	1.09843	0.366616	0.367968	0.882527	0.813589	0.973813	0.790565	1.15271	0.759978	0.263163	1.09193	0.415979	0.299199	0.755421	1.65328
ENSG00000057294	1.0504	2.85597	3.39656	2.45902	2.18536	3.95697	4.76844	2.46324	2.09046	2.40914	2.77733	1.48118	1.83476	1.42934	3.06489	0.723485	1.83309	3.30132	0.1774	1.31726	2.25009	3.44488	3.26602	4.65835	3.87702	1.5268	2.44146	2.92221	2.44302	2.8702	1.70635	2.85492	3.55867	4.51131	0.97171	2.58902	3.53737	2.27041	3.0548	2.17779	0.893756	2.57673	2.31065	4.411	2.82107	2.22804	1.72703	2.5044	2.51043
ENSG00000167768	2.23446	0.0788352	3.32499	7.69307	1.60953	2.72875	0.233523	0.863134	7.01978	4.45925	3.88287	9.55097	0.509051	6.41224	4.5802	2.46015	2.21749	3.13774	10.1219	9.89808	5.89731	6.22246	0.616018	2.64601	2.3002	5.44189	3.56734	1.38777	9.27232	5.60097	11.8062	4.63905	8.67155	0.356972	3.96599	7.56191	3.19513	11.1034	8.14473	8.88756	6.7962	10.6979	10.1668	1.92499	10.815	5.25223	1.93633	7.01393	9.56785
ENSG00000260371	0	0	0	0	0	0	0	0	0	0	0	0	0	0	0	0	0	0	0	0	0	0	0	0	0	0	0	0	0	0	0	0	0	0	0	0	0	0	0	0	0	0	0	0	0	0	0	0	0
ENSG00000022567	1.83319	1.01398	0.913547	1.5652	1.72052	2.26427	3.06183	2.17362	0.644608	2.35813	2.77566	2.01342	2.10293	1.59675	0.945108	1.60292	1.51378	1.95974	1.22333	1.02121	2.64379	1.37689	2.72154	4.35413	3.04039	2.0841	1.64484	2.00988	0.492426	1.06957	1.22096	1.91751	1.08132	2.98363	2.26447	2.06079	0.734568	1.18384	1.72888	1.89754	2.15041	1.29355	1.98006	2.34719	1.90147	1.39817	2.89856	1.76079	1.68404
ENSG00000120662	1.43685	2.0659	2.46031	1.68721	1.39321	0.798045	1.14794	1.39068	0.705949	1.10164	0.882058	1.27527	1.04406	1.13669	1.46661	0.590583	1.3831	1.53328	0.490433	1.42066	1.22184	1.31149	1.65311	1.60928	1.23177	1.62598	1.73514	0.940017	1.48872	1.47485	1.16341	1.33872	0.994618	1.52085	0.780608	1.59691	0.893557	1.81041	1.54396	0.643381	1.36154	0.904314	1.48449	1.21025	1.24034	0.829366	1.1571	1.68445	1.42683
ENSG00000164283	1.30613	1.97628	2.16343	1.80406	1.32251	0.876849	1.92283	1.89519	2.29965	1.4996	2.07103	1.01411	2.87821	1.91044	1.54822	1.9109	1.04042	4.13032	2.62071	0.593171	0.806393	1.64088	2.93393	1.94442	1.70296	1.6491	1.55785	2.25952	2.19641	2.29618	1.39726	1.52778	1.68482	3.17153	1.57244	1.68022	1.61202	1.46774	0.851613	1.24246	1.04143	0.715181	1.81134	2.37637	1.03617	1.38201	0.940049	1.22576	2.73942
ENSG00000013392	1.26456	2.92222	1.68249	1.07755	0.841536	0.654916	0.847099	1.07859	0.688489	1.12343	1.41295	1.0808	1.22377	0.807511	1.07218	1.01045	1.02736	1.9352	0.453339	1.37768	1.57497	0.993163	1.20027	0.905927	1.19068	1.2669	1.35375	0.954417	1.27351	0.693426	1.41458	0.51661	0.8671	1.42797	1.23276	0.73486	0.632738	1.19294	0.819747	0.987893	0.868586	1.05332	0.917146	1.21182	1.1818	0.723425	0.916097	1.04369	0.868331
ENSG00000184178	2.63082	2.40231	2.21351	1.27848	2.68246	3.2738	2.56369	2.30446	2.57035	2.25344	2.43067	2.74782	3.01017	2.54134	2.49684	2.75226	3.30215	2.8959	1.1032	2.4976	3.31717	2.2862	4.0734	3.11197	2.68153	2.229	1.84049	2.90108	2.81493	2.99953	1.93179	3.32924	1.74614	2.9517	2.62315	2.6561	3.16375	3.19567	3.16274	3.29229	2.90835	2.80709	3.21326	3.4867	2.95472	3.1673	3.42104	2.42363	3.13935
ENSG00000166913	6.41094	7.01245	7.26682	6.65943	6.37406	6.56902	6.30908	6.5028	6.50632	6.89868	6.62577	7.56202	5.8347	6.82345	6.67068	6.70575	6.9099	6.47105	5.83609	6.5738	7.11079	6.43096	6.23886	6.9753	6.31736	6.31197	5.9353	6.88499	6.41876	6.39231	6.67325	6.17157	7.12003	6.5622	6.48583	6.36422	6.71369	6.68432	6.92558	6.50413	6.68414	7.35033	6.4963	6.84195	6.65244	6.80561	6.75785	6.82608	6.62931
ENSG00000164112	0.080067	0.278062	0.0584543	0.0499826	0.0593861	0.0270379	0.0748598	0.0881677	0.0628704	0.0105938	0.114754	0.0622776	0.171453	0.0325798	0.0373859	0.252198	0.0362648	0.236097	0.0272196	0.0846502	0.00768192	0.087796	0.053955	0.077507	0.177402	0.144365	0.0649939	0.0321647	0.0409209	0.0227836	0.00947514	0.102855	0.0643557	0.0309065	0.0659292	0.0392744	0.0440175	0.0614899	0.0150222	0.160068	0.0398598	0.0645381	0.10256	0.11417	0.0749748	0.0395557	0.0214447	0.0939412	0.104875
ENSG00000130204	5.34104	4.3007	4.13252	4.26985	4.35929	5.15767	4.8639	4.25877	4.10408	4.16144	5.10219	4.21438	4.81892	5.05861	4.62339	5.5362	4.93229	4.11096	4.4779	4.04795	4.86424	4.63144	5.40533	4.7923	4.38085	3.9292	4.46893	4.4461	4.99123	5.47881	4.11909	4.99117	3.73158	4.95174	4.35211	4.80597	4.07338	4.18631	4.57242	4.30552	4.5972	4.49256	5.1085	4.8986	4.30612	4.17814	5.5014	4.51145	4.38709
ENSG00000189099	0.0355214	0.0202416	0	0	0	0	0	0.0212271	0	0.0161647	0.0241441	0.0193291	0.145927	0	0	0	0	0	0	0	0.023361	0	0	0	0.0515402	0	0.0400921	0	0	0.0346881	0.0287779	0.0682134	0.0181787	0	0.050666	0.0478908	0	0	0.0454489	0.0214076	0.0204504	0	0	0.0189941	0.0513651	0	0.0218536	0.0196519	0
ENSG00000111863	1.86768	3.95223	2.66747	3.38016	0.440675	1.17277	2.24556	0.366983	2.51908	1.91808	0.259507	1.13472	4.4294	0.986892	1.61936	0.507712	0.85719	1.29595	1.21317	1.95763	2.69978	0.756999	0.369114	2.79581	5.74368	1.09987	0.657674	3.87906	4.52991	3.04326	1.88503	1.25376	1.14717	0.742629	1.209	1.90105	1.07977	2.49722	1.12578	1.06607	0.284205	2.75929	1.46074	1.94441	1.64778	0.247757	1.17771	1.13074	2.06476
ENSG00000164182	4.29046	4.80521	4.36818	3.91332	2.9263	4.26411	2.91852	2.96944	3.15706	3.0903	4.04661	3.47588	3.98204	3.34919	3.67369	4.50488	3.6113	4.30255	3.16301	4.04422	3.67573	4.08841	3.35273	3.67249	4.00923	2.85972	3.70379	3.83525	4.62499	4.97532	2.67094	3.73217	2.97608	3.60666	3.374	2.79855	3.3886	2.552	3.58333	3.25742	2.79534	3.05636	3.90739	3.88404	3.34293	3.8696	3.45607	3.06847	3.68737
ENSG00000109618	1.08911	1.21037	1.06592	1.18004	0.871232	1.29517	2.24933	0.910536	0.359674	0.698012	1.25377	0.850155	1.2981	0.869871	1.49871	1.37283	1.60315	2.45887	0.597345	1.2001	1.78148	1.06959	1.30273	1.82984	1.70602	1.19282	0.958725	1.15397	0.721731	0.744885	0.870359	0.976839	1.09148	1.35534	1.26367	1.11795	0.783738	1.67416	1.34133	1.00425	1.45177	0.770574	1.17238	1.15999	1.35221	1.15538	0.721723	0.878103	1.13435
ENSG00000214866	0	0.0112816	0	0	0.0339295	0	0	0	0	0	0	0.0107716	0.010626	0	0	0	0.0308626	0.190252	0	0.036561	0	0	0.015483	0	0.0288637	0.0232613	0	0	0	0	0	0	0	0	0.0423489	0	0	0	0	0	0.0113984	0	0	0.0210916	0	0	0	0	0
ENSG00000153015	2.89276	2.61236	2.88366	2.8801	2.76888	2.80403	2.87506	2.19119	2.42066	1.93532	3.14857	2.07629	2.77485	2.12669	2.90191	2.54815	3.26121	3.67299	2.56191	2.70247	2.35565	2.84773	2.74861	2.76206	2.9776	2.18857	2.3116	3.00901	3.24741	3.20542	2.16662	2.74639	2.23221	2.32464	2.51034	2.27705	2.32783	2.06131	2.70816	2.71329	3.00392	2.16617	2.86321	2.58351	2.66634	2.9591	3.09006	2.64922	2.57907
ENSG00000089116	2.05505	0.914858	1.00504	1.5378	0.758123	0.150351	0.0105829	0.864666	0.459422	1.68297	1.61932	0.386642	0.0359968	1.32783	0.277034	0.63128	0	0.376546	1.37532	0.251024	1.24747	0.0158394	0.0436656	0.266583	0.0165115	0.768618	2.25741	0.00784729	0.676781	1.82124	0.114889	0.555729	0.850087	0.722095	0.0638448	0.657024	0.400299	0.618919	0.521587	0.0337306	0.228588	1.0475	1.03497	1.19385	0.207713	0.621033	0.0613948	0.528801	0.00583626
ENSG00000036448	1.20515	0.250912	1.16693	0.329549	0.375073	0.604139	0.237794	0.0558066	0.0460362	0.295403	0.0370276	0.200663	2.00334	0.472947	0.797591	0.424446	0.677631	0.460067	0.0233427	2.0329	1.09815	0.159942	0.306386	0.124076	0.159825	0.680097	0.099006	0.0580112	0.0736263	0.108872	0.193962	0.571382	1.8677	0.00889067	0.356499	0.402097	0.432258	2.52538	0.0351329	1.75898	0.857355	0.241464	1.19472	0.0474097	1.23434	0.872027	0.558162	0.484918	1.823
ENSG00000267552	0.0446111	0	0.037801	0	0	0	0	0	0	0	0.0303529	0	0	0	0	0	0	0	0	0	0	0	0	0	0	0	0	0	0	0	0	0	0	0	0	0	0	0	0	0	0	0	0	0	0.0325692	0	0	0	0
ENSG00000106038	0	0.0179258	0.00893913	0	0.00908412	0.00491459	0	0	0	0.00955779	0.00716364	0	0	0.0196767	0	0	0	1.25686	0.0245714	0	0	0.00740282	0.00824014	0.0142917	0.0230308	0	0.035533	0	0	0	0	0.0406294	0	0	0	0	0	0	0	0	0.00606224	0	0.00683123	0	0.0153417	0	0.00648043	0	0.00544015
ENSG00000164114	1.16441	1.16559	0.132868	1.27946	1.11724	0.0620134	1.33916	0.350211	0.285688	0.0621714	0.212001	0.314977	1.2284	0.0587863	0.877018	0.439081	0.108652	2.27219	0.0324678	0.319144	0.904052	0.421016	0.624906	0.952092	0.358687	1.31021	0.0446964	0.352883	0.157586	0.152393	0.0603866	0.256567	0.110084	0.220472	0.457514	0.147194	0.13583	0.337256	0.722826	0.772119	0.797488	0.32184	0.296538	0.538869	0.765679	0.270735	0.117982	0.217024	0.506383
ENSG00000149089	1.39792	2.63103	2.23081	1.80933	1.42149	0.948914	1.93984	1.58213	1.19354	1.19032	1.88831	1.14551	1.11846	2.21838	1.47511	1.83648	1.66152	3.18425	0.910376	1.56155	1.82665	1.43471	2.40315	2.23061	2.42695	1.46564	2.05452	1.42386	1.77947	1.36392	1.88582	1.29309	1.22031	1.2745	1.59146	1.44363	0.957593	1.32277	1.60274	1.05109	1.38027	1.08925	1.19795	0.910121	1.44153	2.14204	1.58481	1.05138	1.79725
ENSG00000179632	6.3475	4.9686	5.88062	6.11877	5.14611	5.86028	5.62408	5.74265	4.82368	6.18258	5.57935	5.84483	6.45164	5.82628	5.94658	5.9796	5.92016	5.2624	5.88816	5.45926	5.69634	5.4605	5.99979	6.24669	6.71975	5.40546	5.72725	5.93469	5.94856	5.81827	5.07078	5.86158	5.06856	5.91917	5.76485	5.55994	4.91265	5.50898	5.30851	5.90126	5.311	4.99706	5.6856	5.75006	4.9721	6.28515	5.75289	5.93295	5.60589
ENSG00000114861	2.05732	1.7903	1.58359	1.41053	1.95422	1.70566	2.37535	1.80108	2.38742	2.45573	1.6801	1.95997	1.85467	1.59557	2.49741	2.26092	1.6666	2.56877	1.09978	1.8896	1.94676	2.27996	1.61836	2.90798	2.67159	2.7714	0.860734	1.94403	1.8084	1.64691	1.79657	2.40397	1.93965	2.23161	2.84033	1.82877	2.29855	2.17624	2.28065	2.50014	2.54656	2.36202	2.49258	2.13335	2.62464	2.4678	2.45372	1.86415	3.9105
ENSG00000205030	0	0	0	0	0	0	0	0	0	0	0	0	0	0	0	0	0	0	0	0	0	0	0	0	0	0	0	0	0	0	0	0	0	0	0	0	0	0	0	0	0	0	0.0243231	0	0	0	0	0	0
ENSG00000138193	0.529969	0.2276	0.228956	0.325078	1.48394	0.213704	0.848742	1.13959	0.162524	0.514895	0.281406	0.241409	0.684503	0.279978	0.404479	0.25624	0.763285	1.09868	0.0520394	0.598488	0.548634	0.168944	0.340925	0.72892	0.439597	0.884832	0.258873	0.553867	0.394995	0.19238	0.241696	1.33253	0.551617	0.337595	0.861435	0.319544	0.203035	0.950718	1.09751	0.897609	0.783552	0.302803	0.71995	1.07603	0.9389	0.903263	0.28251	0.720028	0.886494
ENSG00000243073	0	0	0	0	0	0.00900179	0	0	0	0	0	0	0	0	0	0	0	0	0.0225508	0	0	0	0	0	0	0	0	0	0	0	0	0.0125426	0	0	0	0	0	0	0	0	0	0	0	0	0	0	0	0	0
ENSG00000152942	2.66466	2.60332	2.83152	2.93429	2.12296	2.59255	2.91011	2.15631	1.49575	1.95818	2.65198	2.25845	2.5594	2.1022	2.38539	1.81602	2.77486	3.49761	1.19839	2.35284	2.39037	2.24267	2.50419	2.47583	2.57744	2.35762	2.31626	2.69765	2.72611	2.13268	1.95406	2.7282	2.09173	2.64101	2.2015	2.08085	2.12437	2.13937	2.77422	2.20644	2.47577	2.05317	2.21499	2.41588	2.68963	2.82139	2.34368	2.19668	2.65667
ENSG00000118363	3.93802	3.92722	4.28584	2.61167	3.97547	3.55706	2.92392	3.98873	2.60872	3.28126	3.54242	4.26757	3.58402	2.93057	3.20991	3.39442	3.76524	3.73562	2.16241	3.847	3.83327	3.43667	4.01389	3.7463	3.59377	3.32387	3.91319	2.9659	3.18411	4.01699	4.19745	3.09094	3.55553	2.92921	2.83843	3.1525	2.9992	3.47729	3.57172	3.2218	2.98072	3.53388	3.54451	3.20329	3.45567	3.32385	3.8914	2.8443	4.04558
ENSG00000136169	1.21742	0.893699	1.39794	0.990254	1.25839	1.02249	1.47214	1.14803	0.990091	0.851452	0.927716	1.09667	1.20566	0.711743	1.15859	0.683022	1.33926	1.46497	0.266255	1.45295	1.35987	0.903402	1.38436	1.48259	1.08249	1.35353	1.0572	0.855254	1.13015	0.818893	0.781655	1.30589	0.803669	0.889927	1.57134	1.00161	0.69148	1.71811	1.46262	1.16196	1.31769	1.09863	1.27945	1.06302	1.61664	0.606327	1.01397	1.2281	1.37484
ENSG00000121644	3.21319	4.50948	3.86232	3.9475	3.8771	3.41315	4.191	4.03792	3.0906	3.0311	3.51455	3.69538	4.95452	3.53997	3.37993	3.22723	4.29303	4.27275	2.36375	3.24708	4.15813	3.08963	4.70902	3.20184	4.08699	4.03775	4.76749	3.79216	3.16903	3.09105	3.02994	3.70799	4.58055	4.46263	4.13449	4.14518	2.96416	3.72716	3.29641	4.074	3.78972	3.58914	3.88085	4.21212	3.69409	4.17061	3.62517	3.2578	3.60918
ENSG00000135903	0.645281	0.517336	0.0193384	0	0.0454425	0.0830704	0.0142583	1.09912	0.0535212	0.379242	0.0103575	0	0.0203439	0.0970289	0.262929	0.462388	0.00598017	1.16215	0.00893982	0.0694334	0.01002	0.108606	0.103824	0.0206409	0.0111578	0.398885	0.773845	0.0158352	0.225284	0.0149118	0.0184955	0.00496184	0.50269	0.0135301	0.0906569	0.0560674	0.619054	0.276349	0	0.185514	0.342759	0.0128667	0.00494714	0.521728	0.663714	0.0194993	0.0508013	0.0167969	0.252649
ENSG00000138495	4.54668	4.17899	3.52196	4.02449	3.98293	3.64502	4.17429	2.12246	3.19649	3.29413	3.42544	3.6827	3.49428	2.99539	2.39956	6.17944	3.82709	4.30722	3.24977	3.89757	3.67767	3.64288	3.91345	3.59831	2.74708	3.25377	4.82364	3.47953	2.77149	4.20747	3.12356	3.06538	3.01103	3.32108	2.94434	2.96076	2.46702	3.33163	2.74843	3.12981	3.75771	3.10843	2.55576	2.86313	2.97555	2.8979	3.81768	2.49729	3.27735
ENSG00000169992	3.94868	1.12822	1.98511	2.13995	2.44613	2.46277	2.33041	1.34776	2.19679	3.86225	2.02732	2.10032	3.24935	1.81302	2.74472	1.95472	2.77163	2.84025	2.11995	2.22383	1.44164	2.98407	3.12038	3.05914	2.83349	3.21062	1.64576	3.45409	2.35471	1.74059	2.545	3.3647	2.62685	1.50017	3.80075	2.98602	1.66536	2.69836	2.10217	2.74089	2.85047	2.60295	3.2504	2.8153	2.92984	3.07989	1.75115	3.25202	2.61018
ENSG00000253309	0.0270205	0.0305936	0.0114825	0.0913963	0.0908086	0.0497658	0.0500321	0	0.0584099	0.1069	0	0.00736046	0.0359445	0.0126796	0.071397	0	0.0522694	0.0865786	0.0158432	0.0250535	0.0950408	0.0283456	0.0925836	0.0364664	0.0489073	0.0472329	0.0896567	0.0645345	0.0473421	0.0263848	0.224148	0.126714	0.0611225	0.0475066	0.130773	0.276428	0.124072	0.421149	0.109545	0	0.196822	0.0377671	0.0433592	0.0215893	0.0772142	0.0791624	0.0166048	0.044332	0.0139471
ENSG00000101323	0	0	0.0168211	0	0	0	0	0	0	0	0	0	0.031699	0	0	0	0.0309142	0	0	0.036622	0	0.0139367	0	0.0134872	0	0	0	0.0137718	0	0	0	0	0	0	0	0	0	0	0.0127919	0	0	0	0.0128628	0	0.0144784	0	0	0	0.0305277
ENSG00000127564	2.54681	2.45936	2.70178	2.32993	4.29279	2.49309	3.84943	3.33339	2.04914	3.61391	2.09171	3.70735	4.27914	3.91775	3.8699	1.58468	3.79366	2.51085	3.74073	1.84257	2.83238	3.139	3.38337	3.30097	3.52495	2.70813	2.76007	2.81702	2.52317	3.47341	2.6084	3.68503	3.19043	2.78322	2.0283	2.51301	2.78521	2.42444	2.50699	2.42735	2.98281	3.0649	3.2471	3.05731	2.21484	3.48307	3.06172	3.02653	3.22486
ENSG00000176973	4.6782	4.11214	4.34214	3.79221	3.83708	3.88098	3.76978	4.76402	4.10854	4.6975	4.76512	4.75501	3.9902	4.62559	4.65292	5.23564	4.03127	4.07636	5.05377	4.85238	4.36688	4.06377	4.25844	4.09551	4.13477	4.37191	4.29269	4.07983	3.80361	4.67784	4.33053	3.25717	3.94876	4.74466	4.15004	3.41437	3.29324	4.4001	4.10028	3.92086	3.68621	4.31621	3.86684	2.99892	3.97065	4.1236	5.14627	4.24735	3.66908
ENSG00000159479	4.19125	4.95705	4.44176	4.20363	4.20194	4.04988	3.74753	3.56856	4.11965	3.77278	3.88469	3.91359	3.33074	4.01696	4.00816	5.02439	4.17411	4.17055	4.34856	3.72968	5.01313	4.2678	3.99046	3.60917	3.8315	4.39805	3.56593	4.19249	5.05587	4.23755	4.52289	4.51951	4.42186	4.41288	4.00484	3.92512	4.01985	4.18505	3.7119	4.11857	4.04874	4.7547	3.87441	3.88518	3.9886	3.56862	3.8935	3.84634	4.13002
ENSG00000112511	4.26985	2.95634	3.23583	3.52731	3.3013	2.33911	4.3928	3.8561	2.62417	3.5565	3.8747	3.2623	3.72128	3.12978	2.59299	3.65087	3.57303	4.40227	3.26918	3.48892	3.46276	3.53079	3.83135	3.36541	3.50755	4.02849	3.59764	3.38624	2.88029	2.75328	2.412	3.43365	2.36751	3.67256	3.60201	2.98895	2.05846	2.70689	3.18483	2.55892	3.65875	2.5573	3.03413	3.30222	3.12688	3.54774	2.35084	2.93332	3.2012
ENSG00000196381	0.122482	0.336523	0.12722	0.114399	0.0251229	0.00909854	0.106123	0.139236	0.00536253	0.00443796	0.0840483	0.0573722	0.0964278	0.0628884	0.0209571	0.107597	0.0527547	0.0900619	0.152464	0.219339	0.0381294	0.0272613	0.0303213	0.0198347	0.130241	0.173747	0.127583	0.0533866	0.0257944	0.0748236	0.0469155	0.0744444	0.0345964	0.0428866	0.221747	0.0394008	0.0246994	0.108369	0.0617827	0.228578	0.0552445	0.0856953	0.150555	0.0463003	0.16849	0.0735321	0.0297949	0.0840659	0.134959
ENSG00000154511	2.55414	3.22286	2.7479	3.20939	2.58212	3.01786	2.83158	2.29231	2.79754	3.16586	2.17652	2.29572	2.55236	2.49574	2.59311	1.86801	3.30333	2.73282	2.37125	2.54427	1.58519	1.98465	2.8606	2.2356	2.04629	3.26194	3.20804	3.17626	2.78297	3.36196	2.84182	2.8463	3.13183	3.79862	2.14574	2.21058	2.6563	1.87161	2.73057	2.05883	2.32101	3.20999	2.02816	2.1111	2.99769	3.3123	2.94125	3.02885	3.15069
ENSG00000144504	0.831664	0.368483	0.378078	0.412151	0.393648	0.407071	1.15631	0.567089	0.36066	0.428312	1.16288	0.795547	0.919918	0.368334	0.669265	0.539012	0.682856	0.747856	0.320092	0.90132	0.74919	0.554754	0.645189	0.825545	1.33077	0.960023	0.827514	0.707209	0.862903	0.656893	0.574924	0.931131	1.06309	0.706113	0.719675	0.612921	0.577728	0.87647	1.15794	0.552214	0.769692	0.281874	0.604055	0.794371	0.716686	0.54375	0.78745	0.570032	0.431652
ENSG00000142507	7.05416	6.94343	7.10763	6.79696	6.29876	6.68465	6.46324	5.87965	5.634	5.65952	6.61296	6.38144	6.11104	6.20094	6.22241	8.20148	6.55344	5.72953	7.5932	6.26512	6.09075	6.52168	7.04779	6.64554	6.58039	5.98369	7.29882	6.00973	6.26295	7.04049	6.07961	6.30016	5.78181	6.69458	6.31287	6.5674	5.986	5.99306	5.86984	6.42597	6.18111	5.76806	6.5356	5.99919	6.03399	6.50333	5.8934	6.97941	6.42373
ENSG00000164116	1.74851	2.7379	0.67805	1.19798	1.55913	0.922143	1.73046	1.94771	2.39595	0.703197	0.700658	0.647831	2.71655	1.4483	1.48966	1.35294	1.05521	1.68815	0.327362	1.50497	0.739158	0.937657	2.40241	2.21906	1.78861	3.59865	2.34603	1.80279	1.52911	1.19521	0.707	2.14726	0.776848	1.67608	2.66793	1.57529	1.68001	2.3979	1.36791	2.40601	0.879622	2.92522	2.3249	2.43196	3.29231	2.0578	1.46155	3.06687	3.28578
ENSG00000138669	0.317025	0.345293	0.41579	0.253024	0.41271	0.02875	0.210891	0.174971	0.185113	0.191035	0.63958	0.190049	0.303413	0.136193	0.240056	0.420864	0.366971	0.763106	0	0.2261	0.378286	0.0383984	0.29307	0.0233433	0.288627	0.287539	1.27608	0.474868	0.0482522	0.384917	0.149331	0.273858	0.169945	0.575933	0.413229	0.126111	0.304521	0.291939	0.402415	0.237778	0.465556	0.155202	0.204671	0.167325	0.202442	0.224551	0.21696	0.30254	0.123186
ENSG00000174013	2.2239	2.85386	2.98592	4.08696	3.78411	3.97025	3.73761	3.03642	4.29953	2.96635	3.7672	2.92782	3.48052	2.87221	2.59754	3.962	3.78497	3.80869	3.71313	2.53629	3.36632	3.30978	3.83002	2.92858	2.84069	3.09719	3.09598	4.07192	3.21866	2.81249	3.60565	3.62506	3.76103	3.77298	2.74911	3.35797	3.06402	3.49533	2.91834	3.63691	4.67124	4.56281	3.58316	3.26004	3.41216	2.98046	3.92225	3.22468	3.08919
ENSG00000196704	3.73749	5.19786	4.33898	4.328	3.5706	3.81823	3.12255	3.51421	3.0189	3.29093	4.60741	3.21085	3.39391	4.29778	3.53919	4.70148	4.08724	3.97179	2.6623	3.97377	4.44421	3.14384	3.84154	3.91383	3.62178	3.6791	4.03064	3.77272	3.78177	3.35064	3.19408	3.44792	4.28045	3.72565	3.43884	3.57289	2.98781	3.74901	3.1252	3.88742	3.49904	3.72424	3.41367	3.90776	3.47046	3.32499	3.499	4.04651	2.78489
ENSG00000178821	0.471607	0.550532	0.866844	0.263796	1.03538	0.972207	2.01634	2.30337	0.117032	1.13452	1.20718	0.687881	1.18352	0.489959	0.262093	1.70584	2.87307	1.91732	0.425743	2.2406	2.25333	1.07298	2.32893	1.87167	1.74768	0.756795	0.734995	0.304791	1.12904	0.626262	0.247939	1.22145	0.403341	1.84319	0.881834	0.950027	0.210053	1.01069	0.398036	0.72992	1.35054	0.545972	1.14277	0.625456	0.782093	0.585903	1.61563	0.422639	0.120905
ENSG00000106069	0.196227	0.11448	0.547328	0.226515	0.217748	0.170666	0.32235	0.150577	0.120598	0.59867	0.0488582	0.312103	0.158382	0.194968	0.276206	0.200916	0.160072	0.642977	0.0270274	0.557216	0.0451704	0.0639277	0.0485597	0.119175	0.0781684	0.373886	0.122858	0.134264	0.02914	0.217303	0.148499	0.214393	0.370646	0.0321337	0.281606	0.229255	0.176787	0.684387	0.356813	0.311885	0.117385	0.0924633	0.185672	0.1562	0.526582	0.38467	0.1289	0.136518	0.659831
ENSG00000176928	0.657221	1.05789	0.435856	1.3704	0.562343	0.878486	0.56612	0.646008	0.681558	0.304219	0.224396	0.29369	0.426041	0.461748	0.848362	0.426032	0.780094	0.732507	0.572792	1.02021	0.723465	0.407193	0.208656	1.85976	1.24278	0.841421	1.0523	1.24035	1.38163	0.644632	0.641248	0.267892	0.755897	0.160791	0.593764	0.878479	0.904213	0.916364	0.926333	1.57041	0.38692	1.23272	0.242918	0.396411	1.34993	0.551291	0.123918	0.254515	1.10401
ENSG00000129455	5.34634	5.45699	2.97472	5.69403	4.48657	6.57235	1.73087	3.84343	6.64701	3.64272	4.43485	4.3794	1.44445	4.92327	3.44302	3.64032	3.29457	5.02285	8.03964	5.32627	5.95107	6.29982	3.39302	0.497399	0.120076	0.737319	0.957124	4.28182	5.90997	5.93853	5.38627	4.07031	4.8881	1.92492	2.83999	5.55403	6.02027	5.34441	4.0907	5.49559	5.04938	5.88198	6.03102	3.28848	5.93475	3.46316	4.54369	3.75667	4.41704
ENSG00000161896	3.34416	0.266663	1.18282	0.0534948	0.284095	0.236823	0.207777	0.00747487	0.09332	0.0722222	0.242875	0.0337017	0.417631	0.0117219	1.31128	0.144632	0.00980489	0.243886	0.0995427	2.51783	0.200062	0.0175298	0.652312	0.106867	0.440317	0.616478	0	0.0344398	0.107118	0.0952204	0.243163	0.132451	1.21403	0.236213	1.86019	0.0503091	0	2.65364	1.22326	2.67724	0.0214934	0.855121	2.13026	0.0265569	0.472409	0.904017	0.470027	0.65258	2.196
ENSG00000143033	1.82068	2.53915	1.85757	2.54115	2.22128	1.95507	2.76587	2.04122	1.38367	2.34619	1.75268	1.65083	1.99827	1.87072	2.49902	1.32473	2.84622	3.18175	1.48959	1.81893	1.69862	2.08713	2.79322	1.80492	2.51468	2.38558	2.23774	1.91531	2.29112	1.74071	2.42319	1.82561	2.48901	2.674	1.58549	1.59435	1.80071	1.75207	1.83748	1.8658	2.42113	2.07941	1.84542	1.98998	1.98122	2.02977	2.26495	2.01572	2.54982
ENSG00000106410	0	0.112064	0	0	0	0	0.0316288	0.28558	0	0	3.76536	0	0.0450134	0	0	0	0	0	0.0394806	0	1.55025	0	0	0	0.0849407	0	0.0382244	0.0117963	2.27027	0	0	0.0544224	0	4.58966	0	0.0789903	0	0.038693	0	0.236394	0.0194915	0	0.0219511	3.95793	0.0246984	0	0	0.00939552	0
ENSG00000259956	3.2903	2.06475	2.63442	2.90835	2.88454	3.81893	3.40129	3.71378	2.84276	3.423	3.39957	3.50446	4.06358	3.46913	4.2551	2.95278	3.63024	4.18109	1.75916	3.22732	3.32961	3.16115	3.86343	4.23853	3.64719	3.57504	3.10504	3.48666	3.75712	3.17951	3.74812	3.51945	3.36409	3.15561	3.39836	3.35278	3.55715	3.397	3.58185	3.27107	4.32211	3.44454	3.46665	3.85972	3.46464	3.35168	3.32177	3.33821	3.14524
ENSG00000150773	0.473661	0.614416	0.743207	0.311853	0.0955676	0.310905	0.426633	0.5066	0.149114	0.282387	0.641501	0.0609268	0.548673	0.116033	0.401509	0.33547	0.382242	0.646216	0.143736	0.472791	0.68428	0.240348	0.255896	0.64772	0.529525	0.421311	0.479514	0.18623	0.276196	0.146669	0.174875	0.630778	0.475412	0.287549	0.219485	0.130206	0.242486	0.357632	0.779436	0.223213	0.269573	0.277984	0.322934	0.308484	0.28373	0.277813	0.322116	0.451368	0.274923
ENSG00000260729	0.0636273	0.0137613	0	0.0070152	0.013904	0	0	0.00963798	0.00443587	0.00367087	0.0750836	0	0.152263	0.0075736	0.0173518	0	0.0126393	0.046533	0.0188732	0	0.0158876	0.00567822	0.0860675	0.0109683	0.0293601	0.0834269	0.00916316	0.00561084	0.0284144	0.00791657	0	0.0818678	0	0	0.0231327	0.0218542	0.0102637	0.0784826	0.0613181	0.024179	0.0322357	0	0.0311556	0.0425963	0.0522474	0.00691477	0.00497034	0.0177854	0.0166166
ENSG00000205362	0.772089	0.822849	0.321101	0.0717714	0.0713068	0.149895	0	0.0977995	0.50478	0.074942	0.163227	0.0453216	0.55798	0.470448	0.325653	0.546603	0.351893	0.118697	0.427042	0.819724	0.107351	0.168384	0.243411	0.564768	0	1.25358	0.0931186	0.860377	0.20927	0.656067	0.0671841	0.106176	1.93364	0.791649	0.508777	0.0564859	0	0.664497	0.57744	1.73745	0.345079	0.412485	1.2219	0.322911	0.75365	0.435011	0.100609	0.692915	0.813625
ENSG00000203818	0	0	0	0	0	0	0	0	0	0	0	0	0	0	0	0	0	0	0	0	0	0	0	0	0	0	0	0	0	0	0	0	0	0	0	0	0	0	0	0	0.0486121	0	0	0	0	0	0	0	0
ENSG00000196296	1.34929	0.109971	0.201545	0.34436	0.30507	0.14699	0.605636	0.136284	0.0417539	0.29388	0.241149	0.13603	0.304786	0.0979696	0.326352	0.228633	0.309337	0.370769	0.194589	5.36205	0.393145	0.23018	0.969991	0.611268	0.272393	2.51073	0.226658	0.185845	0.191881	0.324064	0.746455	0.87041	3.43605	0.19851	0.696327	0.489433	0.276259	4.39371	0.164474	3.52694	0.74603	0.14084	2.56805	0.141259	4.07018	1.9361	3.57878	0.441275	2.03413
ENSG00000109805	2.15111	3.21021	3.10675	2.40779	2.89419	2.91819	3.63157	2.73744	1.69676	2.06093	1.76322	2.23023	3.13093	2.96217	3.94847	1.18487	3.70799	4.26134	1.64893	1.67819	3.587	2.10499	3.12946	3.61712	3.58464	2.14272	2.87191	2.8836	1.93186	2.57868	2.27339	2.81349	2.97693	3.32635	1.74527	1.41064	3.03498	2.24673	1.98152	3.27901	3.05594	2.25995	2.91871	2.71516	2.07962	3.19681	3.05695	2.58762	3.21349
ENSG00000203780	1.18118	0.393782	1.14614	1.669	0.579597	0.639583	0.414839	0.644457	0.822287	0.721352	0.568865	1.04568	0.537118	0.995141	0.801485	0.616158	0.740753	1.42734	0.827343	1.6844	0.871956	0.860422	0.379401	0.778344	0.811227	1.35392	0.985533	0.761341	1.34993	0.713781	0.771121	1.37795	0.701591	1.02748	1.14859	1.10049	0.491644	0.698281	1.36778	0.28505	0.858853	0.358501	0.895777	0.49627	0.856272	0.707898	0.832389	0.887335	0.512723
ENSG00000111641	3.97571	3.02353	2.85298	3.12349	3.3077	3.86737	3.31025	4.96552	2.69735	3.14811	4.07865	3.85165	6.72675	3.55426	5.26575	2.5932	4.51059	3.60293	2.39619	3.77618	3.66612	4.19991	4.58867	4.00407	3.42427	3.24701	3.82846	3.66453	4.31645	4.01009	3.8039	4.34382	4.17173	3.83185	3.90016	4.3893	3.92459	3.54789	4.54262	3.14127	3.82754	3.06836	3.86776	4.13771	3.68248	4.06964	3.67812	4.05147	4.08262
ENSG00000221923	0.844363	0.892735	0.237953	0.235996	0.411754	0.328091	0.481236	2.26179	0.3832	0.120213	0.302608	0.46489	1.08758	0.268176	0.47649	1.51322	1.20737	0.743888	0.117932	1.09096	1.45917	0.26793	1.39894	0.543756	0.807017	1.52351	1.48466	1.20262	0.247502	0.208289	0.139862	0.374224	1.10877	2.04141	0.94261	0.210485	0.466826	1.12334	1.41584	1.07939	0.194422	0.758667	0.344361	0.346388	1.26449	0.384198	0.536592	0.615882	0.769832
ENSG00000163975	3.42495	1.19974	2.12746	2.61442	5.50406	1.93634	4.65928	3.38314	1.5786	3.45949	3.65918	1.08008	3.60368	2.17435	1.3096	2.5752	2.8658	3.0993	0.940776	0.637114	1.93865	0.698419	2.6453	3.19711	3.06955	1.9322	1.87437	2.64796	0.407654	1.54943	0.290622	2.30909	0.451616	1.58241	1.33369	1.92222	0.807141	0.776278	1.35794	1.08311	3.60427	1.38704	1.66152	1.75634	0.957357	1.93709	3.32761	2.84171	1.53389
ENSG00000127329	0.724815	0.651493	0.482299	0.821133	1.30083	0.551671	1.62688	1.21573	0.858574	0.40172	0.412025	0.696909	1.33768	0.368824	0.702933	1.20315	0.562093	2.20048	0.0886446	0.823503	0.660514	0.161716	0.814011	0.743059	0.915922	2.04183	0.34943	0.433438	0.63821	0.657741	0.332249	0.975197	0.756943	0.631668	1.49046	1.06058	0.721188	1.46086	0.75608	1.5255	0.929709	0.8389	1.3478	2.01923	1.96533	1.06722	0.791423	0.44167	1.52772
ENSG00000077044	1.83123	0.747872	1.20763	1.37698	0.839146	0.647776	2.03021	1.5528	1.13252	2.31325	1.7619	1.53081	1.59973	1.45605	1.72572	1.30078	1.19662	2.29698	1.10594	1.79829	1.70869	1.10738	1.95737	1.43549	2.51217	2.26896	1.63987	1.48552	1.17343	1.18801	1.23142	2.38617	1.87563	1.47065	1.85571	1.53835	1.12601	2.40777	1.66761	1.83197	1.27698	1.09939	1.83268	1.85964	2.05613	2.21983	1.41769	1.64848	1.90279
ENSG00000143183	3.9594	4.83768	4.74014	3.84281	3.79262	4.37463	3.34592	4.13852	3.52358	4.02154	3.68754	4.72736	4.20426	4.19569	3.56825	4.62067	4.07465	4.25008	3.46482	3.99675	4.06872	3.90923	4.01997	3.61617	3.85913	4.11144	4.48003	4.08204	3.17189	4.30276	3.36796	3.62354	4.08988	3.98319	3.551	3.75201	3.70588	3.70706	3.62356	3.779	3.50579	4.06074	3.50331	3.52051	3.89114	4.01392	4.01798	3.80264	4.02228
ENSG00000108774	5.29829	5.69583	5.41703	5.47243	5.4678	5.77057	5.02159	5.24717	5.02455	4.85186	5.45424	5.18415	4.83142	5.7931	5.23938	4.95892	5.24675	5.00332	4.21853	5.2422	5.47115	5.27113	5.46975	5.04767	4.88959	5.45135	5.50665	4.55239	5.01654	5.10814	4.9706	5.07632	5.37084	5.25354	5.09668	5.25374	4.8938	5.49419	5.02784	5.0449	4.90566	5.49842	5.26744	5.33431	5.21232	5.37872	5.12028	5.32342	5.19876
ENSG00000125522	0	0.0148347	0	0	0.0224248	0	0	0	0	0	0	0	0	0	0	0	0	0	0	0	0	0	0	0	0	0	0	0	0	0	0	0	0	0	0	0	0	0	0	0.0312132	0	0	0	0	0	0	0	0	0
ENSG00000183696	3.90627	6.43301	7.3204	6.79821	3.85269	5.28223	2.13359	2.94611	5.7085	4.42448	4.90732	4.11762	2.97817	6.7671	3.90997	7.91752	3.22371	3.60174	6.63479	4.03927	2.99651	5.81134	2.29103	1.84214	2.47054	4.99455	4.96552	5.74656	5.57732	6.07271	5.43465	4.26961	5.67146	4.90066	3.52015	4.69015	5.51661	4.13138	4.74945	4.34736	2.91805	4.86977	4.52699	4.82707	4.21374	3.64136	3.94232	4.19105	4.15713
ENSG00000269113	0.37229	0.0753801	0.150069	0.113486	0.140613	0.0843155	0.0780713	0.177976	0.109041	0.429697	0.086368	0.189462	0.278895	0.274376	0.648998	0.175562	0.0389403	0.136678	0.011765	0.572523	0.0229953	0.10899	0.160157	0.0068303	0.0613857	1.07482	0.0226852	0.223046	0.0482556	0.257049	0.169468	0.377997	0.0897471	0.144706	0.471934	0.262215	0.0930125	0.511167	0.488247	0.34613	0.11677	0.239948	0.485899	0.225975	0.31865	0.2046	0.149841	0.206978	0.367307
ENSG00000166126	0.857472	0.711615	0.565558	0.114504	0.921043	0.309036	1.06656	1.8693	0.0614131	0.558279	2.88015	0.628104	0.24379	0.938644	0.655604	1.85239	1.9876	0.388034	2.15061	0.738694	2.35554	0.379322	1.60508	2.9951	1.18006	0.559033	2.58996	0.38754	2.41551	0.592319	0.493074	0.8891	0.490456	1.45574	0.126053	1.13507	0.156096	0.716993	1.19384	1.14149	1.81404	0.304798	1.33392	1.93719	0.300376	0.130914	0.276425	0.395399	0.187835
ENSG00000276289	0	0	0.00821606	0.0167612	0.0249045	0.009019	0	0	0.0522946	0.00878483	0	0.00526447	0.0206616	0.00907363	0.0104247	0.020614	0.0375499	0.0141028	0.0225937	0	0	0.00680373	0.0811986	0.00658379	0	0	0	0	0	0	0	0.0250246	0.0342965	0.017157	0.0548486	0	0	0.014798	0.225456	0.0346531	0.0601334	0.00545949	0.0062783	0.0103271	0.0487698	0.00828469	0.0118872	0.00535283	0.00998197
ENSG00000129451	7.63527	4.65335	2.77659	4.3419	5.04546	6.85292	3.30094	5.71402	8.82843	4.33203	5.21004	4.77642	2.04675	6.90589	4.08418	4.33068	5.28537	5.30058	9.66489	6.4731	8.13757	7.71996	4.85469	3.0989	1.53829	3.11549	6.66777	4.41876	8.4803	7.53388	6.74504	6.08569	5.12712	1.14555	5.17126	8.36696	6.56502	6.43242	6.23757	7.47421	7.20979	7.85217	8.06508	5.39342	7.03257	3.78211	6.12435	4.64701	6.33226
ENSG00000117139	2.61435	2.81354	2.90009	4.20089	2.69727	3.95452	2.44689	4.41509	3.75885	4.14001	3.70568	3.97603	3.36731	3.61609	3.56845	2.78032	2.94489	3.51943	3.10547	3.08355	3.81304	3.0237	3.44835	2.80908	3.2797	3.53482	3.6572	4.61761	3.61569	3.1382	4.10711	4.11189	4.07042	4.15833	3.48822	3.99299	3.79312	3.87212	3.98829	3.74922	3.87486	3.74183	3.54761	3.99271	3.56753	3.52296	3.84335	3.41843	4.3943
ENSG00000244025	0	0	0	0	0	0	0	0	0	0	0	0	0	0	0	0.0803815	0	0	0.0664441	0	0	0	0	0	0	0	0	0	0	0	0	0.0734743	0	0	0.0411417	0	0	0	0	0.0344943	0	0	0	0	0	0	0	0.0316771	0
ENSG00000001460	1.05889	1.69942	1.4966	1.33375	1.58051	0.936699	1.07056	1.77252	1.00243	1.61825	2.15301	1.87238	1.23913	1.44953	1.64178	0.882244	2.00181	1.38457	1.87698	1.2376	2.67606	1.51832	1.93726	0.738736	0.855472	2.45697	2.44454	1.11204	2.31066	1.04493	1.28124	1.36687	2.15505	2.18729	1.2478	1.60384	1.41557	1.43981	1.79469	0.819132	1.47853	1.26376	1.40658	1.14434	1.10138	1.42965	1.12631	1.39176	1.27495
ENSG00000135723	3.55193	2.64599	2.71915	3.60911	2.82278	2.18946	2.33898	2.46666	2.88016	3.24156	2.12076	3.2738	2.54971	4.05133	3.89623	2.61236	3.02307	1.99873	3.5379	3.01294	2.78726	3.66802	2.7119	1.87217	1.73772	3.37873	1.70837	3.21917	2.79774	3.37059	2.72763	3.21006	3.2992	3.08067	2.70296	2.37884	2.44705	3.09051	2.78614	2.5412	1.90273	2.82103	3.05963	2.8588	3.00195	3.33273	2.32452	3.37429	3.22709
ENSG00000080031	1.7706	1.33431	1.31453	3.04512	2.8493	0.221487	0.737559	2.74555	1.33305	2.67458	3.74404	0.309788	0.0930765	0.705467	0.680851	1.46935	2.03755	0.375242	1.01974	0.237304	1.19981	1.9674	0.282903	0.137368	0.565862	0.254775	0.703749	1.48389	0.791622	0.730585	0.969886	1.69498	0.326593	3.03126	0.988885	1.70793	0.675075	0.827909	2.54911	1.13845	1.53674	1.29225	0.273599	2.35063	0.515106	1.09221	1.36993	0.26284	0.563877
ENSG00000168300	2.82579	2.16	2.602	2.01212	2.35977	2.32637	3.31258	2.77469	2.21414	2.83319	2.33632	2.36498	2.71046	1.83277	2.6213	2.13954	3.06862	3.55327	1.6773	2.86192	2.44074	2.23642	2.58783	3.52415	3.95147	3.0235	3.07142	3.1799	2.76253	2.31806	3.14968	2.61867	2.41948	2.33307	2.67845	2.32193	1.92504	3.16934	3.10083	2.87886	2.20454	2.24567	2.26852	2.11108	2.59207	3.33543	1.96815	2.66912	3.04282
ENSG00000196772	0	0	0	0	0	0	0	0	0	0	0	0	0	0	0	0	0.0295487	0	0	0	0	0	0	0	0	0	0	0.0262011	0	0	0	0	0	0	0	0	0	0	0	0	0	0	0	0	0	0	0	0	0
ENSG00000145451	0.0147454	0.0454804	0.0186718	0.00639464	0.0189736	0.010281	0.147776	0	0.002023	0.0183066	0.00250636	0.0336871	0.223106	0.0137746	0	0.0312298	0.0143897	0.123827	0.0214805	0	0.0430291	0.00517571	0.0649089	0.0661879	0.0478538	0.0844483	0.0372141	0.0102105	0	0.0108112	0.00597721	0.00239699	0	0.0065462	0.0105869	0.00250636	0.0093567	0.00282439	0.00948318	0.00886116	0.0314845	0.00207783	0	0.0039345	0.00269127	0.0157064	0	0	0
ENSG00000106125	0.362494	0.37535	0.212986	0.456288	0.183569	0.0745439	0.229582	0.323982	0.0698041	0.241576	0.340498	0.412453	0.457433	0.129807	0.256758	0.738212	0.262275	0.523373	0.34581	0.14518	0.220401	0.0856073	0.136828	0.418697	0.412482	0.391293	0.287286	0.273937	0.324251	0.302095	0.0837324	0.317148	0.0744972	0.229674	0.135906	0.295742	0.221592	0.206454	0.346897	0.187845	0.196948	0.102388	0.128665	0.483805	0.166277	0.103638	0.219853	0.175592	0.302303
ENSG00000076984	3.81029	1.70715	2.30486	2.92782	2.89015	1.99998	3.06516	3.17868	2.64545	1.84763	3.18181	2.8792	3.10753	3.22216	3.26067	2.51143	3.6293	3.52521	2.5953	3.08651	3.55236	3.2401	3.55102	3.32504	3.26976	3.08487	3.58905	3.32967	3.78181	2.99712	3.1067	2.91749	2.92982	3.16807	2.82945	2.4292	2.62204	3.31312	2.90918	2.62855	3.29046	2.46963	3.22138	2.98115	3.17022	2.9346	2.89815	2.80579	2.77297
ENSG00000271824	0	0.0707957	0	0.0183348	0	0.0390742	0.0585322	0.144732	0.0116102	0.0474325	0.0566521	0.111061	0.0448485	0.0197881	0	0.236963	0.142607	0.228999	0.0490044	0.11399	0	0	0.032866	0.0566514	0.0307995	0.165419	0.849984	0.0146759	0.0371646	0.0206803	0.0171426	0.0137482	0.021545	0	0	0.0286041	0.0134504	0.0791839	0.0405155	0.012739	0.0121678	0	0	0	0.0457997	0.0180734	0.0638846	0	0
ENSG00000125843	2.12099	1.40149	1.36689	1.43763	1.77838	1.86001	2.05945	1.77139	1.33267	2.11939	1.87191	1.92752	1.55888	2.26534	1.58977	1.9026	2.00399	1.64547	0.959175	2.79181	1.90901	1.74017	1.87548	2.2731	1.49309	1.60383	1.63303	1.95298	1.50502	1.20838	1.63633	1.90816	2.2251	1.58488	1.75668	1.54515	1.80148	2.45461	2.00344	2.13617	2.32018	2.19484	1.95657	2.33534	1.92642	2.14846	1.99197	2.49757	1.96019
ENSG00000155974	0.495412	1.07179	0.262214	1.49835	1.22337	1.00718	1.47988	0.276739	1.056	0.739136	0.220162	1.4197	1.02553	0.834541	1.04705	0.999277	0.874028	1.52884	0.86176	0.970736	0.924954	1.04843	1.4369	1.63168	1.44218	1.5454	0.84771	1.75633	1.84743	0.61903	1.82246	1.67911	0.702423	0.0196151	2.66326	0.619615	1.46989	1.1025	1.35518	0.598954	1.49779	0.694396	1.16998	1.93416	0.577031	1.041	0.920116	1.405	1.16051
ENSG00000105053	2.49587	1.67533	1.83675	1.83609	2.11421	1.72695	2.4346	1.40142	1.55655	1.13834	2.01422	1.39582	1.68666	1.76633	1.68972	2.3035	2.20807	2.05647	1.66428	1.83957	2.07569	1.669	2.27933	2.34306	1.89424	1.7331	1.41684	1.60368	1.80831	1.49472	1.6867	1.80581	1.50049	2.07638	1.69078	2.10215	1.69861	1.71424	2.00933	1.6348	1.74014	1.42105	1.68304	1.92056	1.74068	2.32156	2.00342	1.76124	2.04185
ENSG00000260286	0	0	0	0	0	0.05909	0	0	0	0	0	0	0.0229399	0.0398987	0	0	0	0.0311553	0	0	0	0	0	0	0	0	0	0	0	0	0	0	0	0	0	0.0290352	0	0	0	0.0257494	0	0	0	0	0	0	0	0	0
ENSG00000117394	6.73426	7.42053	8.09577	8.45232	7.79055	6.51408	7.13848	7.87218	7.85438	8.20104	8.39282	8.71279	6.11527	8.69847	8.41525	7.39887	7.99092	5.34711	7.9753	6.29171	8.18879	8.01566	7.31956	6.56678	7.4785	8.37532	7.92623	8.13886	7.87375	7.40911	8.65772	9.44151	9.14657	9.14338	6.40948	8.35713	7.94125	8.50622	8.06485	6.91934	7.39579	7.94291	8.1388	7.19289	5.76008	7.70425	7.97792	7.49205	8.07977
ENSG00000125084	0.0261657	0.0442153	0	0.0449627	0.13006	0.024303	0.184783	0.0156159	0.0143547	0.0584752	0.0353169	0.0422378	0.121574	0	0	0	0.0204656	0.988852	0	0.0481197	0.0341756	0	0.0204251	0.199989	0.197706	0	0	0.0537514	0	0.0255499	0	0.0830416	0	0.0231904	0.0188074	0.0867222	0.0330654	0.0200075	0.0335087	0	0.170927	0.0147421	0.016945	0.0415115	0.12848	0	0	0.014455	0
ENSG00000030304	0.16838	0.0239042	0.169389	0.0146358	0.0919866	0.0117929	0.0157876	0.0150921	0.027614	0.0416793	0.0341401	0.0182912	0.0358664	0	0.361486	0.0764408	0.013217	0.0245218	0.00990061	0.177716	0.0546479	0	0.108454	0.0171708	0.012356	0.11506	0	0.0117121	0	0.00827899	0.033967	0.0540392	0.411277	0.0444862	0.240908	0	0.00537656	0.834021	0.0535887	0.481257	0.038449	0.0698709	0.416707	0.00451454	0.107211	0.258189	0.0410698	0.121112	0.313041
ENSG00000172288	0	0	0	0	0	0	0	0	0	0	0	0	0	0	0	0	0	0	0	0	0	0	0	0	0	0	0	0	0	0	0	0	0	0	0	0	0	0	0	0	0	0	0	0	0	0	0	0	0
ENSG00000164266	0.302411	1.69076	1.3892	1.31255	0.54392	0.0547151	0.0222553	0.0283001	2.31532	0.192901	0.919086	0.182946	0.122886	0	0.0996597	0.206337	0.17636	0.133403	0.474215	0	0.12071	0	0.108172	0	0.270933	0.108619	0.225863	0.0490021	1.88339	0.11278	0.182228	0.202874	0.287249	0.980663	0.799447	0.0161788	0.0301248	0.0888866	0.187784	0.213921	0.0407096	0.0529603	0.331211	0.809634	0.0345263	0.0601821	0.0434822	0.126509	0.0839466
ENSG00000187135	0.0237065	0	0	0.0205248	0	0	0	0	0	0.0214484	0	0	0	0	0	0	0.0185387	0	0.0276545	0	0.015569	0	0	0	0	0	0	0	0	0	0	0	0	0	0.0170358	0	0	0	0.0152632	0.0142639	0	0	0	0	0	0	0	0	0
ENSG00000214929	0	0.00390321	0	0	0	0	0	0	0	0	0	0	0	0	0	0	0	0	0.0160204	0	0	0	0	0	0.00502176	0	0	0	0	0	0	0	0	0	0	0	0	0	0	0	0	0	0	0	0	0	0	0	0
ENSG00000168237	1.04522	1.22099	0.992111	0.58728	0.77396	1.40701	0.754678	1.11291	1.001	0.577152	1.27389	1.20267	1.1777	0.812666	1.39222	0.978348	1.48602	1.29361	0.85792	1.19462	0.95436	1.74297	0.890767	1.06438	0.89497	1.28142	0.909755	1.07639	1.01797	1.19789	1.24828	1.04231	0.76843	0.83381	0.743828	0.915578	1.15924	1.18101	0.990947	0.928193	1.07123	0.843474	1.0177	1.37657	1.13466	0.7693	0.665549	0.936494	1.05693
ENSG00000009724	0.0574092	0.131364	0.0622898	0.220961	0.103978	0.0345306	0.314469	0.155488	0.0405655	0.119697	0.0718197	0.0792714	0.124022	0.0461338	0.169285	0	0.0513248	0.280979	0.0194156	0.104644	0.0642962	0.101702	0.0512242	0.135083	0.139522	0.259875	0.117998	0.116629	0.06495	0.0717006	0.247921	0.124481	0.249512	0.23214	0.206442	0.253853	0.141232	0.36471	0.167173	0.0828735	0.507729	0.130114	0.083926	0.155854	0.133528	0.0212387	0.0941935	0.11498	0.0996547
ENSG00000177519	0.417042	0.588302	0.0987383	0	0.0610068	0.0332775	0.0875491	0.861694	0	0.145426	3.651	0.273307	1.08891	0.129487	0.171113	2.86689	0.226597	1.37634	0.371456	0.423989	1.40995	0.016819	1.54561	0.0950166	0.0175323	1.18806	0.273105	0.0969647	1.29221	0.0691305	0.094546	0.358535	0	0.289922	0.667903	0	0.0303072	0.0894139	0.527178	0.334938	1.85229	0.0135052	0.162217	0	0.196874	0	0.154298	0	0.0367978
ENSG00000105048	6.82178	4.7681	5.24485	5.33173	4.82352	1.25144	4.49949	3.0565	5.12259	5.4172	1.55452	2.72731	0.361629	5.15218	4.03195	5.14091	0.853315	4.70943	7.20234	7.34643	4.6081	6.12906	4.84113	2.184	1.62651	3.1884	1.49059	4.10271	5.24139	5.10953	4.79083	3.72378	6.28328	2.87657	4.75551	3.92378	4.97672	6.10432	3.45197	6.2617	3.24299	4.61708	3.3073	4.73096	5.23035	6.16197	4.84583	4.94027	5.71948
ENSG00000198888	10.9356	8.67034	7.94074	10.1759	8.66863	11.6703	10.6369	10.2492	9.79155	10.7996	10.4126	11.1862	10.0623	9.96298	8.21829	9.12149	11.1627	10.3822	8.52578	10.4815	10.6701	9.44494	8.71781	11.2927	10.6896	11.2523	10.376	10.5659	11.1468	10.704	10.321	9.97831	11.0053	11.5718	11.6999	10.9968	9.99111	10.2582	11.0175	10.895	11.0049	10.7322	9.5746	10.4236	9.88483	9.06909	11.0251	9.6975	9.87101
ENSG00000143224	2.16295	1.31925	1.87891	1.21059	1.35527	1.16783	1.55714	1.71154	0.512844	1.39124	1.68581	1.80807	2.61181	1.31856	1.47244	1.29585	2.14849	2.06963	0.608883	1.63334	1.68158	1.36948	1.73026	2.04365	1.85113	1.8328	1.89616	1.36308	1.75881	1.18235	0.747644	1.79073	1.26089	1.34202	1.27014	0.916557	0.674921	1.40797	1.53418	1.00323	1.73117	0.777968	1.08118	1.19996	1.16917	1.3715	1.08669	1.26744	1.29545
ENSG00000206047	0	0	0	0	0	0	0	0	0	0	0	0	0	0	0	0	0	0	0	0	0	0	0	0	0	0	0	0	0	0	0	0	0	0	0	0	0	0	0	0	0	0	0	0	0	0	0	0	0
ENSG00000049239	3.24682	1.66758	2.18105	3.72131	3.31176	2.90965	4.36294	4.14278	2.82097	4.05876	3.34623	2.93097	3.08252	2.20509	3.57105	2.26333	2.82927	4.11699	1.86457	3.01916	4.06802	2.54304	3.5515	3.09882	2.8456	4.71907	2.71268	3.39124	2.34386	2.40928	2.58707	3.44462	3.06086	2.82356	3.80331	3.69556	3.03059	3.77268	4.09917	3.80935	4.31401	3.42708	3.30774	3.08732	4.2587	3.31445	4.39058	4.41536	3.70257
ENSG00000089902	2.45622	2.26469	3.05517	3.72476	4.00046	4.02786	2.95727	4.41862	4.05481	3.65741	3.59256	2.6464	2.76614	3.75036	4.48227	3.15881	4.44474	3.18954	4.25723	3.54974	4.67189	4.15393	3.4085	2.73365	2.68126	3.62426	3.92982	4.56044	4.13537	3.62063	3.90177	4.03454	4.61008	3.88128	2.47651	4.74518	4.15647	3.95341	4.13891	4.04252	4.40721	4.57802	4.2985	4.61237	3.93892	4.26525	3.97657	4.69363	3.90405
ENSG00000178075	0.610588	0.230776	0.64654	1.13607	1.28482	1.08017	2.02017	0.386996	0.440228	0.185113	0.314409	0.447446	0.234895	0.298435	0.196132	0.353636	1.13871	1.29523	0.117383	0.876619	1.19228	0.51425	0.593384	0.938343	1.14299	0.784098	1.02707	0.394074	0.506206	0.400895	0.894808	0.54558	0.206732	0.912799	0.286182	0.513185	0.511597	1.00277	0.906853	1.04764	2.15886	0.632855	0.168943	0.739219	1.28036	0.309588	0.487298	0.466642	0.446924
ENSG00000108443	2.03945	2.34152	1.65406	2.26048	2.44543	2.79439	2.72639	2.5351	2.0386	2.05869	2.31802	1.76921	2.01565	1.82241	2.59204	2.0489	2.75553	2.90785	1.44536	2.33212	2.7057	4.64833	2.59083	2.40751	2.55482	2.5553	2.53611	1.94871	2.8804	2.27644	3.01097	2.40777	2.48096	2.56164	2.11494	2.27918	2.02907	2.43878	2.35199	2.17563	2.82255	2.30232	2.77754	2.70963	2.65903	2.30434	2.78105	2.78155	2.75303
ENSG00000106571	2.11174	1.25334	1.74239	2.64598	2.29797	1.39492	2.80306	2.37849	1.90841	2.55909	1.54346	2.06378	1.94484	2.17425	2.64851	1.44979	1.72954	2.23662	0.803198	2.13331	1.85507	1.80655	2.03544	2.27681	2.12882	2.78722	0.088612	2.58483	1.66688	1.57269	2.29576	2.45138	2.73234	1.86163	2.322	1.85145	2.27696	2.95936	2.95083	2.33316	3.17361	2.56501	2.18207	2.35048	3.09236	2.33267	2.19733	2.5623	2.65988
ENSG00000152049	1.77192	2.05354	0.797256	0.714634	0.37614	0.750606	0.581621	0.423571	1.42685	1.27418	0.582849	0.987928	1.72132	0.882022	1.11199	1.23772	0.286079	1.01527	0.249193	0.907013	0.570892	1.12953	2.23625	1.00848	1.2551	2.5217	0.282442	1.92052	1.03901	1.64891	0.383384	1.78172	0.530046	1.25181	2.03817	1.07928	1.08197	1.57068	0.398916	2.29927	0.716895	1.98753	2.03925	1.57994	2.42549	1.79975	1.13549	1.96504	1.88991
ENSG00000123364	1.6632	0.693397	1.87094	2.77642	1.71814	3.36558	0.0669197	0.899296	1.50873	3.41014	0.938216	2.29377	0.709647	2.31096	2.82441	2.46341	0.0114131	1.28829	1.87742	2.68909	1.67454	1.96252	1.79291	2.67972	0.0106692	1.14923	0.757129	3.092	0.0128927	1.42152	3.54933	2.48833	1.73288	0.0257611	2.67433	2.9556	2.14255	4.01728	2.46464	1.48859	2.82208	2.31772	1.77828	0.852799	1.51433	3.36786	1.85214	1.8912	2.16409
ENSG00000196227	1.54697	3.4003	2.89461	2.41409	2.31349	1.27035	2.40619	2.05042	0.833419	1.94221	1.44436	2.11705	1.90267	2.11734	2.3565	2.39376	2.02353	2.96185	1.28954	1.75224	2.80409	1.63672	2.41698	2.3833	2.89923	1.64396	2.7998	1.20565	1.6865	0.735221	1.99538	1.57632	2.6902	2.67631	2.01372	1.48856	1.54229	2.32811	1.88506	1.87983	2.44366	2.25986	2.51771	2.68082	2.31222	2.14497	1.86737	1.83535	2.43237
ENSG00000072694	0.794807	0.908841	0.788047	0.17971	0.678662	1.08236	0.270717	0.257186	0.804437	0.126853	0.225343	1.08899	0.592999	0.3746	0.534062	0.437864	0.520443	0.61751	0.450691	1.27182	0.252853	0.49501	0.839351	0.738956	0.926332	1.00342	0.16994	0.782529	0.283516	0.354566	0.161194	0.763411	0.341129	0.147154	1.7498	0.342638	0.637655	0.524278	0.828879	1.92533	0.318693	0.554278	0.845389	0.852822	1.52098	0.517818	0.413597	0.354677	1.03065
ENSG00000188186	5.71029	5.57635	5.77386	5.0178	4.59516	4.44527	3.75765	4.46666	4.10989	5.15191	5.00202	4.16316	5.08886	4.31784	3.98713	7.08592	5.48979	4.98589	5.95217	5.14206	5.84084	4.88406	6.17271	4.97141	4.96569	4.82215	6.31102	3.97695	4.46516	4.71826	3.69252	4.39355	4.17697	5.23728	4.69213	4.90572	3.38354	4.07359	4.08519	4.50486	3.99684	3.87835	3.66645	3.98366	4.31837	4.4604	4.6046	4.86443	4.0138
ENSG00000175309	1.6422	0.837276	1.6176	1.55144	1.83333	1.36641	2.24424	1.1627	1.04466	1.93096	2.26607	1.88158	1.99064	0.97417	1.16815	1.10575	1.73028	2.20586	0.871418	1.71772	1.36387	1.57587	1.56176	1.39664	1.88223	1.82989	1.46536	1.65735	1.5374	1.07822	1.3075	2.19207	1.30898	1.40579	1.09347	1.57558	1.16082	1.65091	2.33783	1.4225	1.97107	0.866556	1.36825	1.45631	1.9702	1.4159	0.983576	1.23144	1.61754
ENSG00000150477	0.332536	0.388398	0.369804	1.60257	0.679403	0.262415	0.98859	0.557431	0.23182	0.345286	0.669937	0.216419	0.411368	0.288521	0.44014	0.195007	0.75117	1.18834	0.340934	0.457994	0.321426	0.368982	0.642443	1.16382	1.65747	0.618842	0.248353	0.445199	0.605887	0.219571	0.44355	0.432978	0.322167	0.298085	0.403223	0.373511	0.377289	0.459744	0.585592	0.445108	0.713277	0.425638	0.325562	0.466397	0.537065	0.290256	0.347872	0.355191	0.416518
ENSG00000011052	1.32756	2.05801	2.21539	1.49626	1.85245	1.25275	0.737625	1.3152	1.5678	0.758239	1.05377	1.36744	1.2881	0.875631	0.750484	0.959801	1.60736	1.20149	0.430909	0.941359	1.38581	0.990494	1.38378	1.02544	1.38332	0.552157	1.41242	0.455044	1.95395	1.21336	0.850255	1.13498	1.37103	0.812538	1.04836	2.05212	1.62107	1.28686	0.798802	1.69589	0.789217	0.986254	1.86461	1.65261	1.00789	0.803295	1.43452	1.73942	0.633387
ENSG00000181649	4.74495	5.04635	5.07142	5.53288	5.74726	4.9603	4.88621	4.52142	5.48249	4.29963	6.13502	4.85899	4.19318	5.35987	5.07219	6.05904	5.25317	4.79112	4.66992	4.24695	6.21665	6.28136	4.36936	4.57439	3.86203	4.47688	5.5042	4.99035	6.89093	4.99308	4.6217	4.64198	4.30681	6.48303	3.88638	4.97636	4.99037	4.54936	4.92592	3.02449	5.14158	5.34724	4.73676	4.53474	4.76053	3.65748	4.06414	3.72252	4.82533
ENSG00000110395	1.57655	0.749598	1.52583	1.76981	1.4898	2.22203	2.77859	2.09964	2.62592	2.52039	1.8363	2.22154	1.6931	1.55274	2.42473	0.80328	1.84734	1.84472	0.793648	1.55023	2.82329	1.8647	3.09281	2.34704	1.58803	2.51895	1.60151	2.17263	2.13986	1.01302	2.43636	3.18341	3.27445	2.64533	2.63584	3.02333	2.39955	2.92298	2.67559	2.22106	1.92194	2.62994	3.28444	2.84908	2.94286	2.60124	2.32305	2.19199	2.4219
ENSG00000107018	0.0631471	0.018179	0.249884	0	0.182098	0.101217	0.17027	0	0.0348433	0	0	0.0345116	0.0998273	0.0298292	0	0.0671605	0.0249764	0.333673	0.177168	0	0.0209829	0.0224072	0.024927	0.203459	0.0233556	0.177946	0.105503	0	0	0	0.0512514	0.139325	0.0163252	0	0.0229557	0.0216868	0.0403147	0.0952868	0.0408538	0.0754169	0.0365024	0	0.0611869	0.0170579	0.0461814	0.131389	0.0955733	0.0523125	0.0327919
ENSG00000128973	3.6949	3.01634	3.05743	3.226	4.38653	3.12534	3.56587	4.30352	3.04209	2.76664	3.74208	3.75993	5.05207	3.89571	4.18182	3.21957	2.88922	3.60113	3.36417	3.28668	3.03751	3.54802	3.4294	4.02223	4.12715	3.84813	4.10439	3.52721	3.18797	4.26005	2.95925	3.42078	2.84276	3.57797	2.99526	4.1571	3.5006	3.16502	3.60526	3.51584	3.56569	3.40433	3.60951	4.23533	3.28438	3.23433	3.99569	4.02346	3.47144
ENSG00000100842	2.99157	2.33237	2.10526	4.73131	4.15768	3.47595	3.86409	4.48383	3.06367	3.62404	4.66788	3.87433	4.00003	4.49869	3.23703	3.29172	4.53266	4.20915	3.88477	4.12218	4.24946	2.69792	5.7353	4.27123	4.47444	3.62346	4.8724	4.12335	4.16883	3.41591	3.81503	3.81981	2.73136	3.49004	3.72585	3.15369	3.61798	4.35729	3.57677	3.77054	4.44171	3.42554	3.06007	3.69792	3.02059	3.45743	3.65829	3.38993	2.83514
ENSG00000116285	3.91977	4.22053	5.37592	4.79204	3.07768	4.53825	4.00392	2.69378	5.50682	5.21741	3.56721	3.46194	3.72282	4.39062	4.80638	2.88549	4.1548	4.61705	4.54631	3.5097	4.13623	6.48143	4.34161	4.99858	4.98714	4.77589	3.05026	5.41776	4.25296	5.15779	4.48277	4.9207	4.30977	4.58373	4.37461	4.29809	4.1313	4.04349	4.69508	4.0461	3.44127	3.99835	4.25437	2.91115	4.29402	5.24389	3.2319	4.23035	4.56989
ENSG00000167880	3.39233	0.852544	1.05814	4.73561	4.29684	5.24666	4.43499	4.49553	5.41464	3.57166	5.01271	5.12955	3.08794	4.93868	3.98147	3.22732	5.01132	4.28628	5.8116	5.60023	4.37833	5.00684	4.13645	4.36329	3.86793	3.70478	4.17794	4.06242	5.63448	4.86783	5.76115	4.08565	5.06	4.34887	4.24181	5.21064	5.09125	5.75997	5.44827	4.66765	5.57296	5.15768	5.19187	4.96493	5.15382	2.63596	5.34252	4.80669	4.38358
ENSG00000139656	0.0425304	0	0.139032	0.0368544	0.0366129	0.0395186	0	0	0.1563	0.038503	0.0289306	0.0459712	0.022857	0	0.0456036	0.0303265	0.159337	0.031043	0.232348	0.0778495	0	0	0.0332406	0.0289302	0.0915043	0.0979133	0.0479881	0.0868573	0	0.041535	0	0.0548372	0.0432588	0	0.0606011	0.112396	0.0270824	0.0644091	0.0274463	0.0756398	0.0486121	0.116297	0	0	0.0310442	0	0	0.157339	0
ENSG00000104998	4.22136	2.84876	2.11603	2.86186	4.24881	3.28586	5.14326	4.74654	2.11091	2.4514	4.25502	2.45802	4.37577	2.77831	4.24061	1.82422	2.69243	4.30433	3.06517	3.39881	3.93107	2.9692	2.50298	6.43025	6.23138	2.9686	2.98642	3.50998	3.87653	2.96966	2.33814	2.88264	2.0837	3.61588	3.32172	2.4089	2.72442	3.01112	2.58651	2.3612	1.26389	1.97057	3.34492	2.59246	3.46212	3.11948	2.78797	2.83333	3.78033
ENSG00000082068	3.06504	3.90188	3.74472	2.25155	2.17162	1.62396	2.03974	2.59451	1.38472	2.41581	2.58115	2.10921	1.97978	2.10327	2.6862	2.75742	2.80531	2.72947	2.14012	2.59526	2.20123	2.01475	2.51953	2.22211	2.68186	2.33237	2.82727	2.35853	2.05373	2.29215	2.28551	2.85472	2.10299	1.75898	1.68355	2.23527	1.88218	2.14685	2.413	1.90263	2.26996	2.17008	2.11671	2.19264	2.05567	2.4098	2.35543	2.31536	2.46059
ENSG00000258064	0	0	0	0	0	0	0	0	0	0	0	0	0	0	0	0	0	0	0	0	0	0	0	0	0	0	0	0	0	0	0	0	0	0	0	0	0	0	0	0	0	0	0	0	0	0	0	0	0
ENSG00000186723	0.031301	0	0	0.179868	0.0533692	0	0	0.14318	0.0509552	0.0283265	0	0	0.0333903	0.0579212	0.0335721	0	0	0	0.521611	0	0.24699	0.0859485	0	0	0.0454463	0.036666	0	0	0	0	1.19794	0.0404036	0.123346	0	0	0.236574	0	0.0706724	0.0400652	0	0.218221	0.0523125	0.0402853	0.113203	0.0228235	0	0	0	0.0321572
ENSG00000137948	0	0.027643	0	0	0	0.0151547	0	0.00487151	0	0.00370471	1.85087	0	0.0303407	0	0	0	0.0316797	0.0295258	0.0378442	0	0	0	2.12547	0.0165721	0.0178499	0.00959899	0.00924746	0	0.0215588	0.00798943	0.0197628	2.55487	0.00416852	0	0.0117194	0	0.0103581	0.719572	0.010498	0.118073	0.0233103	0	0.00528781	2.41923	0.0177886	0	0.0100149	0.0179486	0.00421057
ENSG00000165312	4.17294	2.58673	3.49407	4.49666	3.37575	5.16018	3.53773	2.33726	2.71198	3.4939	3.48658	4.04758	2.55062	2.57361	2.33142	2.97842	3.75341	3.4821	2.59851	3.03497	2.62498	4.29811	2.54413	2.37366	2.53182	2.97738	2.2286	2.09677	1.79778	3.50951	3.17149	2.93139	4.42613	3.22379	2.84214	3.84014	1.86204	4.00816	3.00555	3.27356	3.16461	2.66546	3.06402	2.28259	2.94095	3.03449	2.92758	2.63505	3.24064
ENSG00000136319	0.890267	2.27718	2.30337	1.9892	1.57182	1.0663	1.52368	1.65578	0.728114	1.38586	1.14565	1.1248	1.55861	1.46724	1.6257	1.02011	1.5796	1.40149	0.609016	1.13467	1.56219	0.86625	2.06015	1.5242	2.85999	1.45	1.94221	1.71968	1.34845	1.59391	1.19237	2.70587	1.05588	1.33234	1.06287	1.50511	1.507	1.45751	1.56645	1.50913	1.35015	1.13114	1.2877	1.37197	1.37711	1.20521	1.36579	1.17407	1.45687
ENSG00000249915	4.45134	5.41116	5.05477	4.11559	3.82088	3.23978	3.00993	3.79015	2.54382	3.29804	4.4147	4.239	4.68556	3.47669	4.05136	4.51637	3.55512	3.02575	1.91792	3.91655	3.87232	3.52548	3.21551	3.12203	4.22096	3.21614	4.1646	3.33978	3.37033	3.41166	3.21096	3.40565	3.81298	3.27772	2.73958	4.37564	3.28157	3.3824	3.57508	2.73648	3.17044	2.85288	2.97667	3.26309	2.61539	2.86619	3.00139	4.01691	2.7634
ENSG00000181991	2.75867	4.01136	3.45743	2.61817	3.02148	2.60191	1.99194	2.30539	1.55209	2.32872	2.71708	2.46841	2.87387	2.52093	2.47106	2.33499	2.33355	2.71158	2.11021	2.65058	2.03455	2.19492	1.98061	2.68946	2.88213	2.24156	3.04067	1.90156	2.27144	2.61189	2.05283	2.26206	2.37426	2.19707	2.28055	2.38224	1.941	2.4676	1.97308	2.48739	2.65678	1.98327	2.39061	2.48594	2.21771	1.93381	2.30515	2.44023	2.07119
ENSG00000079819	2.02755	1.76095	1.34805	1.40371	2.47442	1.73226	3.40245	2.38609	2.12861	1.88551	1.33604	1.26661	3.1745	0.800264	2.3904	0.641828	2.53752	3.68759	0.203841	1.97913	2.58895	2.02697	3.16503	2.21171	2.87089	2.86719	2.38285	2.51237	1.00898	1.75672	1.18133	2.41887	0.769718	1.97099	3.41917	1.23284	1.96902	2.26246	1.69851	3.13561	2.31634	2.08784	2.01579	2.29278	3.30429	2.09112	1.86796	1.62767	3.19421
ENSG00000044524	0.729019	0.727138	0.112616	0.2722	1.84505	0.181064	0.723823	0.209078	0.482937	0.310849	0.0531288	0.105615	0.938715	0.13302	0.406137	0.745605	0.172325	1.16738	0.0669014	0.821035	0.0547861	0.211208	0.697406	0.367476	0.441922	1.15218	0.759742	0.515048	0.22585	0.667036	0.280914	0.303785	0.132026	0.285842	1.71844	0.546121	0.275677	0.793109	0.224488	1.45482	0.690196	0.751953	0.71286	0.759797	1.21492	0.561165	0.272721	0.710288	1.5925
ENSG00000211452	0.0308396	0.14287	0.0261128	0.0529332	0.0396199	0.0567371	0.138582	0.124241	0.0336661	0.0209819	0.0720346	0.0659376	0.0808808	0	0.0166336	0	0.127982	0.0555694	0	0.0566389	0.294425	0.0323499	0.0710727	0.051817	0.0666587	0.0361265	0	0.0424705	0.373475	0.015136	0.0125427	0.116278	0.0620721	0.0934985	0.0548162	0.0820378	0.0580453	0.0352424	0.368799	0.192239	0.111609	0.0173877	0	0.149427	0.0335991	0.0132248	0.0189614	0.0170494	0.0472678
ENSG00000143793	2.90926	2.22099	1.91899	2.23477	2.50221	1.84591	2.50821	2.79732	1.13381	2.09847	2.69992	2.78376	4.29719	2.90966	2.64856	3.34289	2.73935	2.21549	3.2145	2.67039	2.7965	2.41369	2.95331	2.46703	2.65583	2.5248	3.27526	2.49186	2.46565	2.48055	1.75395	2.39734	2.04083	2.35877	2.13925	1.84164	1.37359	2.03106	1.91031	2.04492	2.48496	1.66198	1.82288	1.90938	1.70264	2.47154	2.14744	1.90518	2.31484
ENSG00000134333	7.20969	9.11773	8.51906	8.5846	7.90989	8.16523	6.30033	7.60918	8.02443	8.28495	8.17554	7.46105	7.08735	7.35492	8.32012	5.3367	7.7336	6.75967	8.24901	7.24048	7.56244	8.15577	6.92631	6.71696	7.70228	6.42976	8.22189	7.97879	8.5429	7.67383	8.45048	8.00313	8.1137	7.62684	6.62799	6.78747	8.62603	7.24616	7.94451	6.70553	7.12163	7.21532	7.46637	6.94724	6.77767	7.7954	7.88584	7.29041	7.71067
ENSG00000143184	2.34874	1.66782	1.46907	1.05393	1.05972	0.724954	0.472081	0.557622	0.340322	1.73967	1.1591	1.83449	1.64495	1.72564	0.712658	0.91345	0.838633	0.160917	1.44756	1.43533	1.3754	1.16942	1.75463	0.397745	0.479959	0.799728	1.82718	1.64712	0.955126	1.98471	0.0617476	1.50836	0.0262305	0.98112	1.45707	0.513327	0.672616	0.132673	0.273087	0.369628	0.445193	0.301907	1.02582	0.698867	0.899443	1.29891	1.18963	0.0561533	1.19995
ENSG00000114062	2.24363	2.96817	2.72298	3.01592	2.88102	2.4299	3.42939	2.76863	2.58506	2.04455	2.67175	2.30941	2.91782	2.0125	2.81256	2.07041	3.58547	3.49321	1.56226	2.51346	2.88882	2.45962	2.73607	2.8923	3.17882	2.83296	3.02277	2.71968	2.87445	2.35951	2.89966	2.84438	2.72734	3.04791	2.50191	3.11226	2.40844	3.21607	2.83407	3.13103	3.16997	2.77828	3.08952	3.33533	3.01359	2.35021	2.99509	2.80077	2.56799
ENSG00000119772	1.79383	1.09321	0.746666	1.2723	1.5627	0.875621	3.27594	2.33005	1.11688	2.41149	1.82758	1.53769	2.51006	1.65752	1.25385	1.55713	1.70587	3.00492	1.02673	1.16778	2.24756	0.840533	2.17122	2.23664	2.69052	2.00663	1.3797	1.42088	1.80766	1.01519	1.10131	1.78104	1.58298	1.71882	1.76357	1.43201	0.930111	1.68945	1.84551	1.2163	2.12414	1.4855	1.24911	2.11515	1.90789	1.40907	1.41698	1.41873	1.73602
ENSG00000138735	1.31499	0.890206	0.479662	0.429537	0.50623	0.449106	1.72435	1.05329	0.354279	0.666398	1.22252	0.40428	1.17289	0.436462	0.330193	0.306119	0.774595	2.02477	0.141581	0.750488	1.43976	0.428537	0.930375	1.90979	1.25093	1.70021	0.986068	0.652526	0.904765	0.568114	0.489148	0.680362	0.621839	1.39632	1.29925	0.635265	0.514093	1.40554	0.612989	1.23215	0.846998	0.66663	0.844884	1.18427	1.46095	1.15407	0.360808	0.62273	0.959557
ENSG00000131845	1.48675	1.85338	1.33041	1.16927	0.974521	1.85657	0.810467	1.55745	1.42402	1.92317	1.67068	1.44318	1.60335	1.28899	1.79923	1.16961	1.68951	1.29761	0.643708	1.41427	2.11828	1.40624	2.4639	1.48344	0.857314	1.31847	1.28278	1.85232	1.42223	0.998108	1.71107	1.51412	1.69932	1.73757	1.91409	2.36559	1.55308	2.22313	1.55247	1.83571	2.15359	1.83934	1.95337	2.07501	1.98808	2.55437	2.53965	1.7958	1.83361
ENSG00000182220	5.9552	6.90176	5.93612	5.80212	6.00154	5.86634	6.19355	5.70729	5.98832	5.72337	5.26485	4.94512	6.17351	4.81766	5.61407	5.88006	5.92327	6.23021	4.70313	5.97328	6.15396	5.45324	5.10165	7.05463	6.45239	5.82027	5.27483	5.90774	5.74566	5.56183	6.05076	5.50201	5.05449	4.36548	5.92448	5.43155	5.28567	5.75964	4.99945	5.75572	5.38387	5.23825	5.3985	5.45471	5.60571	5.79168	5.66033	5.74475	5.80106
ENSG00000166896	2.53012	3.66261	2.91494	2.61457	2.66033	2.78135	2.46584	2.55039	1.92817	1.81062	2.07773	1.865	2.96964	1.93876	2.17242	1.93264	3.41754	2.21878	2.38291	2.52562	2.11361	1.86823	2.71531	2.22378	3.08846	1.63564	4.11096	2.09249	1.8472	2.43292	1.89855	2.47132	2.04716	1.26242	2.55555	1.93367	1.938	1.7645	1.96095	1.73843	2.38014	1.71249	2.00073	2.17409	1.81534	2.84469	2.01236	2.42134	1.42674
ENSG00000167676	0.256278	0.343527	0.0648993	0.164844	0.29528	0.136508	0.231634	0.506654	0.0891261	0.235723	1.99167	0.179555	0.206099	0.0765048	0.0875972	0.329672	0.153535	0.49263	0.218466	0.915474	0.915363	0.166603	0.153244	0.185069	0.223231	0.667752	0.0620544	0.0532937	0.968645	0.135777	0.0964412	0.600297	0.484912	2.03006	0.27388	0.366855	0.161174	0.5748	0.612699	1.25398	0.851048	0.0434079	0.2149	1.37154	1.49005	0.233455	0.589457	0.157705	1.4761
ENSG00000228696	0.0333325	0.0608188	0.0490412	0.0501526	0.170565	0.0309651	0.0464494	0.165571	0.018307	0.0850843	0.077769	0.0927462	0.137249	0.0311512	0.162433	0.0586483	0.137962	0.282914	0	0.0908143	0.027343	0.10793	0.101429	0.0723501	0.371997	0.185427	0.0189353	0.0345527	0.128024	0.0564893	0.0665772	0.0692658	0.0422584	0.0295506	0.121647	0.146412	0.0264527	0.134993	0.0738422	0.0300197	0.151126	0.126731	0.174086	0.0441375	0.0658895	0.200917	0.0851858	0.081162	0.0841316
ENSG00000102007	8.59951	8.41161	8.15987	8.09611	8.88818	8.77943	7.67042	8.15849	7.94492	8.17035	8.48954	7.83127	7.91318	7.4918	8.13623	7.17982	7.94877	7.40709	7.43425	7.99275	7.9882	8.36043	7.76401	8.75026	8.0214	6.81812	8.13522	7.99479	7.20362	8.06651	8.19078	7.91877	6.93901	7.10195	7.31197	8.00817	8.1344	7.2839	7.32741	7.09584	7.86499	7.21484	7.89555	7.83846	7.3519	8.38214	8.42418	7.9056	7.39269
ENSG00000118094	0.0655528	0.0188828	0.0187748	0.0381574	0.0190783	1.84788	0.0811279	0.0198027	0.0121625	0.0300005	0.0809284	0.0120458	0.0469564	0.0104005	0	0.121701	0.0598191	0.0321429	0	0	0.00730145	0	0.0258897	0	0.0162173	0.172866	0.0125808	0.0153732	0.0292851	0.010871	0.035692	0.0843293	0.0337182	0.00986247	0.144749	0.0880653	0	0.191407	0.0768463	0.10968	0.0316574	0.0371531	0.157084	0.0352222	0.0557907	0.0376169	0.0991726	0.042419	0.0284346
ENSG00000048162	3.79202	3.63065	4.22398	3.24679	3.07041	4.08806	2.60614	3.46389	2.43055	3.09654	4.35314	3.22678	4.09565	3.72366	3.79877	4.29227	3.9049	3.10263	3.33862	3.64307	3.66287	4.31562	3.31109	3.08343	3.05677	2.66854	4.00141	3.56689	4.42857	4.26666	3.19531	3.7941	2.86897	4.03209	3.07119	3.34093	3.30877	2.76628	3.46998	3.06731	3.30449	2.67579	3.25917	4.29869	3.20615	4.10231	2.89632	3.10307	3.5949
ENSG00000146535	4.08475	3.892	5.36823	4.65405	4.04744	3.74946	4.18701	4.20516	4.0817	5.09268	3.51358	3.77943	4.07548	4.5209	4.39487	3.18088	2.91947	3.50826	2.47988	3.4956	5.16119	3.67438	4.05366	3.53985	4.17493	5.02235	3.42501	4.40653	3.23018	3.52407	4.04165	4.7588	4.85357	3.98618	4.6875	4.38754	3.46028	4.37661	4.15912	4.26255	3.31388	4.54719	4.53018	4.04264	4.20568	4.37368	4.68341	4.10984	4.32975
ENSG00000135547	2.18387	1.88631	0.213708	0.817448	1.03622	0.561559	1.19703	1.76609	1.15609	1.34991	1.5895	0.926262	1.79193	1.04145	0.659251	1.68526	2.17999	1.19003	0.418141	1.21209	0.641141	0.501151	1.464	1.12519	0.761735	1.67606	1.70814	1.05795	0.917425	1.06267	0.572466	1.66543	0.627098	0.996678	1.5113	0.713141	0.804262	1.54334	0.803082	1.07064	1.29734	1.79836	1.19833	1.20205	1.73459	0.980891	1.38908	1.86494	1.84319
ENSG00000168306	0.298639	1.10778	0.307565	0.516967	0.19244	0.420078	0.19294	0.155699	0.465143	0.0611754	0.594895	0.182456	0.452353	0.409387	0.388005	0.561966	0.349679	0.559464	0.153077	0.559294	0.264016	0.455229	0.188215	0.0965329	0.246621	1.09228	0.148387	0.383779	0.670666	0.247445	0.128218	0.380667	0.151198	0.109944	0.511929	0.142482	0.855385	0.490138	0.45754	0.675976	0.183166	0.298007	0.493923	1.0063	0.693961	0.322504	0.267125	0.246457	0.377084
ENSG00000064102	3.22502	4.10333	3.7745	3.58512	2.43646	3.35259	3.04554	3.87898	3.15714	3.30133	3.41009	2.29754	3.64507	2.65998	3.16963	3.2768	3.9481	3.54578	2.8181	3.43563	3.10707	3.12682	3.91168	3.27307	3.44465	2.78275	3.90261	3.89431	4.06765	3.36201	3.71396	3.40546	3.98028	4.00074	3.16397	3.3958	3.63217	3.4585	4.34601	3.39029	3.0535	2.35014	3.56476	4.44903	3.28856	4.00474	3.61899	4.10398	3.41729
ENSG00000148426	3.35529	2.13969	3.64627	2.00751	3.37389	3.97436	3.76686	2.76189	1.95987	3.46736	3.00307	2.57533	1.08706	2.05707	1.50701	1.53939	2.43786	2.94912	2.50733	1.07726	2.63555	3.18206	2.42428	5.65056	4.8287	1.53782	2.79696	1.52132	2.63263	3.68773	1.61944	2.0273	3.44686	0.893804	2.09475	3.0836	2.43044	1.5488	2.48911	1.64483	2.36601	3.10736	3.04914	2.62204	1.77073	3.23251	2.37946	0.981037	4.28013
ENSG00000115685	4.43104	3.7111	3.29069	3.00469	3.35964	3.8114	3.89826	3.62804	3.23159	3.43252	3.98639	4.69927	3.58843	3.78266	3.41676	4.75734	3.73246	4.11439	4.20372	4.36193	3.7588	3.03865	3.33593	3.84197	3.8005	3.86691	3.77379	3.39081	3.43404	4.21923	3.26235	3.77816	3.7698	3.2984	3.40241	3.63612	3.15783	3.79755	3.60892	3.47912	3.63233	3.15141	3.22117	3.3243	3.71797	3.60939	4.20029	3.67877	3.20029
ENSG00000167332	0.0245577	0	0.031069	0	0	0.0508214	0	0.036357	0.0466021	0.0868943	0	0	0.120423	0.0229461	0.026344	0	0.00963476	0.129093	0.0705759	0.0227686	0.0241273	0.0172264	0.066001	0.120579	0.0961071	0.0846682	0.244124	0.00853653	0.0951266	0.127212	0.0394923	0.0317208	0.42287	0.0643309	0.119235	0.033153	1.24492	0.109154	0	0.154783	0.0141156	0.0206998	0.077806	0.0325503	0.0957855	0.131092	0.0594215	0.0135633	0.043869
ENSG00000130649	0.177195	0.0854276	0.0937621	0.372657	0.287041	0.96801	2.90502	0.0282972	0.224042	0.103167	0.380571	0.0873181	0.133706	0.232271	0.077257	0.168281	1.4061	0.657625	0.167002	0.727089	1.64205	0.0256366	0.0974336	3.04221	1.82243	0.469807	0.0083341	0.0278437	0.169078	0.153897	0.213471	0.273861	0.0589555	0	0.243317	0.54398	0.0116598	0.068848	0.291266	0.147399	0.266058	0.0629194	0.0236686	0.0577898	0.577064	0.0156706	0.545684	0.0361545	1.01088
ENSG00000100029	4.47855	4.99884	4.21883	4.32698	4.23625	5.03259	4.31601	5.60107	4.61288	4.76928	4.58592	4.51906	4.54963	4.73958	5.07391	6.79173	4.60128	4.35586	5.29423	4.62878	4.30473	4.74681	4.63593	4.51303	4.7579	4.40746	5.07916	5.1045	5.3946	5.11691	4.19637	4.75827	4.39506	4.63786	4.39671	4.55186	4.35996	4.8767	4.59149	4.31766	4.19263	5.07508	4.60643	5.3626	4.45884	4.70932	4.71432	5.10569	3.93328
ENSG00000255508	0.879419	0.725423	0.494695	0.377937	0.593984	0.595279	0.423189	0.982559	0.460279	0.771969	0.619492	0.626826	0.696298	0.542288	0.5543	1.11687	0.755957	0.627496	0.534902	0.568996	0.839209	0.320694	0.562405	0.784585	0.735052	0.849334	0.594021	0.633177	0.504384	0.369335	0.464228	0.668749	0.406826	0.329063	0.716143	0.281165	0.335015	0.629048	0.386887	0.698689	0.75939	0.625798	0.73243	0.338924	0.561621	0.635965	0.465193	0.553051	0.551446
ENSG00000119471	2.28738	4.17342	4.29206	3.70823	4.47353	4.59285	3.9009	4.14776	3.47466	3.28689	3.75667	3.70086	2.51478	3.01731	3.88098	3.15767	4.92089	3.86393	3.64415	3.59465	4.27255	3.99708	2.71833	3.57911	4.19568	3.3721	4.09325	3.05245	3.27144	3.16833	3.60677	3.23037	4.49991	4.62073	2.86537	3.37997	3.29332	3.36673	3.73026	3.23335	4.69916	3.4204	4.52667	3.3429	3.71863	3.68148	3.81254	3.39295	3.91236
ENSG00000172345	1.61411	1.65504	2.29348	1.39391	2.44811	2.80095	1.16434	1.32108	1.15723	2.00662	2.17053	2.36453	0.375008	1.30291	1.51274	0.17957	1.01222	1.07222	0.880061	2.00969	1.63638	2.79725	0.531449	1.56507	1.14318	1.2665	1.04234	1.0794	1.19975	2.17012	2.21414	1.73297	1.79287	1.18306	0.857096	2.02225	1.82257	1.28816	1.81315	0.817773	1.70815	1.76307	1.61762	0.853112	1.85753	1.37735	1.58968	2.17014	1.65545
ENSG00000132300	2.1969	3.34588	2.95455	2.38129	2.06559	2.35107	2.42522	2.74227	1.63864	2.24515	2.37684	2.05398	2.93875	1.89192	2.66269	1.75043	3.22727	2.86727	1.62675	2.41252	2.66925	2.53674	2.87384	2.57312	2.81943	2.4498	3.05344	2.5292	3.04441	2.58863	2.16973	2.6768	2.58485	1.97895	2.35211	2.28066	2.22487	2.21653	2.47889	2.40794	2.20791	1.96119	2.73658	2.81219	2.64132	2.55517	2.3945	3.09672	2.63883
ENSG00000175894	0.261234	0.0617848	0	0.297362	0.14302	0.0183427	0.0438708	0.0141213	0.0301078	0.306589	0.0319576	0.185544	0.0905138	0.0653559	0.0337577	0.039006	0.00619639	1.08843	0.0184663	0.0291862	0.811226	0	0.196673	0.0053756	0.0173062	0.0093058	0	0.0272402	0.0415073	0	0.0254922	2.05269	0.0633353	0.00702601	0.0226347	0.260451	0.0200141	0.0768244	0.0101775	0.153717	0.159426	0.0133308	0.00512607	0.0126326	0.105901	0.00676511	0.0384501	0.0600099	0.0202941
ENSG00000100197	0.19065	0.0326367	0.118101	0.450532	0.154067	0.0660329	0.271655	0.715502	0.0698692	0.343834	0.235889	0.22561	0.229419	0.154564	0.105442	0.202221	0.519293	2.65965	0.613964	0.49714	0.0743258	0.135994	0.785146	0.768661	0.179531	0.488168	0.269443	0.30709	0.214444	0.0828525	0.238102	0.530357	0.0931998	0.372774	0.26613	0.36395	0.0453832	0.493737	0.339826	0.10926	0.784439	0.0243043	0.241716	0.195169	0.0922463	0.0960136	0.127877	0.130124	0.0369267
ENSG00000162076	4.55371	4.00623	3.91132	3.68077	4.38054	3.79266	3.62176	4.56765	3.49219	3.90384	3.52706	3.94166	4.258	4.07214	3.76155	4.53033	4.52315	3.21287	4.26515	3.95969	3.44466	2.97254	3.99227	3.78425	3.85327	3.73726	3.84121	3.73734	4.08323	4.31224	3.56812	3.63512	3.58243	2.08613	3.99951	3.10936	2.81319	4.1129	3.41543	3.51756	4.12998	3.75456	3.36835	3.67603	3.42354	3.3964	3.69538	4.06952	3.44651
ENSG00000182667	2.28713	1.72693	2.51417	0.787786	0.587252	0.564282	0.933265	0.576309	1.69358	0.516965	0.634011	0.629056	1.94517	0.819291	0.612397	0.919014	0.169278	0.967832	0.26647	1.32425	0.498902	0.471806	2.47398	0.381092	1.44055	2.04829	1.12825	1.78159	1.45505	1.52545	0.438513	1.03144	0.598192	0.952401	3.04606	1.43745	0.953117	2.71901	0.7131	2.20846	0.982813	2.27577	2.017	1.40428	2.41519	1.57766	0.903199	1.63051	1.72168
ENSG00000197919	0	0.0345526	0.19484	0	0.102289	0.123414	0	0	0.0658873	0.0276209	0	0.0165955	0.0485683	0	0.126715	0	0	0.022253	0	0.0560607	0.0593655	0.124013	0	0	0.0443206	0.0706454	0.0681103	0.102876	0	0.0876282	0.0964338	0	0.0463233	0.130474	0.147054	0.176683	0	0.0233468	0.0196678	0.018382	0.11865	0	0.13306	0.0163077	0.0222539	0	0.0555792	0.0663392	0.0467837
ENSG00000204519	0.865476	1.49825	1.20788	0.789896	0.747721	0.970664	1.9751	1.59769	0.618135	1.26644	1.30091	0.920168	1.43838	0.797624	1.31568	0.50971	1.75637	1.73686	0.12662	0.942358	1.89617	0.717821	1.54444	1.90978	1.60204	1.20707	1.55351	0.948758	1.0083	0.726139	1.37117	1.13967	1.45226	2.02778	0.937974	1.28421	1.09133	1.66406	1.33866	1.12883	1.37579	1.29703	1.41291	1.78517	1.56382	1.94547	2.13156	1.30226	1.2296
ENSG00000229117	7.72885	8.55107	8.41514	7.96606	7.05486	8.14927	6.5301	6.89173	6.85673	6.91836	7.807	7.39393	8.58345	7.32228	6.74044	8.06682	7.46755	7.34634	7.52215	7.85137	6.68072	7.86051	7.68723	8.0627	8.46388	6.77124	8.80979	6.35354	8.124	7.66162	6.56551	7.35992	7.61525	8.20832	7.54382	7.19451	7.3601	6.75699	6.88239	7.32833	6.21971	6.52228	6.72982	7.6966	6.7797	7.43431	7.44901	6.89239	6.82053
ENSG00000057149	5.09522	2.06007	3.4123	6.75716	8.51289	8.11458	4.12247	5.44627	6.3815	3.69038	6.63217	4.92164	2.08148	4.49204	3.76174	6.74618	6.23163	5.23016	4.88366	6.63161	2.09687	6.95757	0.307607	0.62582	3.08479	5.07743	6.5643	5.80774	2.08054	6.04344	4.09974	6.32081	1.84481	0.0976416	4.40834	7.34943	4.91151	5.33587	7.14664	5.51648	8.17329	6.59017	2.94125	2.62992	7.44019	3.91276	6.37672	2.03412	5.82032
ENSG00000100628	1.67859	2.80847	2.53519	2.45191	2.87353	0.560189	1.36709	0.731399	0.537699	1.9841	0.641236	0.564686	2.10526	2.58101	1.1287	2.40023	1.78557	0.813473	2.54589	1.6252	0.609139	0.341363	0.314852	0.849121	1.08926	1.21433	1.02435	2.17862	0.235038	1.34892	0.297845	2.30905	1.56353	1.71662	0.900111	1.4482	0.358312	1.78122	1.96633	0.983208	0.768205	0.78173	0.752918	0.257064	1.33052	1.82005	1.51296	0.478119	1.19178
ENSG00000158481	1.58978	0.944932	1.60083	1.0903	1.71057	1.76889	0.899792	0.716839	1.25084	0.198552	0.112924	1.23138	0.470028	0.401485	0.669125	0.227464	1.36123	0.68884	0.189639	2.99498	0.279489	0.456945	0.231421	1.37487	1.59951	2.33701	0.159019	1.50036	0.330753	0.417312	0.222345	0.627637	0.375327	0.043234	1.83764	1.40687	1.01637	1.23276	1.61983	2.05763	1.15059	0.987962	0.82888	0.449273	2.1407	0.197166	2.50617	0.370745	1.24383
ENSG00000243543	0	0	0	0	0	0	0	0	0	0	0	0	0.023773	0	0.0474162	0	0	0	0.101277	0	0	0	0	0	0	0.101733	0	0.0307181	0	0	0	0.0570096	0	0	0	0	0	0	0.464319	0	0.0254924	0	0	0.0236801	0.0322846	0.110498	0	0	0
ENSG00000173272	4.40694	3.44682	2.9882	2.67141	3.63761	1.92956	2.72955	2.50798	1.70523	2.51901	3.75909	3.58883	3.84928	3.33641	2.74469	5.18917	3.1582	3.36588	4.39591	2.68613	3.31299	2.54445	3.49462	2.94864	3.33319	2.64434	3.9405	2.24092	3.12014	3.80201	2.10458	2.63007	2.37444	3.22267	2.18576	1.97824	2.50126	1.92904	2.25164	2.75348	2.88327	2.87931	2.70169	3.10095	1.92862	2.9697	3.39035	2.26536	2.61766
ENSG00000075914	2.77604	3.44958	3.26158	2.53839	2.18654	3.2151	2.96554	2.57774	1.96866	2.7987	2.75626	2.30101	2.9153	2.33269	3.12445	3.78652	3.76629	3.02602	2.6261	3.07831	3.02859	3.321	3.23811	3.48512	2.32902	2.37883	3.5908	2.61682	3.48283	2.7673	2.71225	2.9255	2.39358	3.32365	2.56513	2.35986	2.89934	2.35505	2.62269	2.46118	3.07795	2.10481	2.79867	3.2619	2.00652	3.33593	2.80904	2.8162	2.45345
ENSG00000197444	0.291558	0.0347971	0.0260269	0.818507	0.147049	0.218977	1.78235	0.144048	0.043472	0.86054	0.877243	0.033236	2.51997	0.0513003	0.0132782	0.118527	0.320532	1.95162	0.0216123	0.0341371	0.0868546	0.00434103	0.350652	1.21286	0.109096	0.0780639	0.892915	0.207692	0.657711	0.035945	0.024895	1.62957	0.0343566	0.0486817	0.135944	1.72657	0.00393012	0.0918353	0.268554	0.128275	0.595116	0.123571	0.0473475	1.20346	1.38028	0.403897	0.467165	0.0765626	1.74997
ENSG00000168811	0.164591	0.585005	0.218412	0.0734864	0.320967	0.0710453	0.986384	0.247118	0.127551	0.0989762	0.894585	0.126374	0.396236	0.079193	0.287499	0.0486859	0.117564	1.98256	0.0983972	0.123771	0.269952	0.183059	0.0401826	0.712078	0.387993	0.209152	0.0953271	0.191607	0.0749296	0.082688	0.0140233	0.451798	0.0263643	0.279758	0.16517	0.0803461	0.0752979	0.0263634	0.255739	0.0412288	0.133426	0.0575413	0.0333748	0.246499	0.337512	0.0294213	0.0829707	0.110749	0.33434
ENSG00000137440	6.25535	8.43135	8.85667	7.02574	5.89491	6.4152	6.93152	7.19659	7.08885	6.83779	8.18866	7.80695	3.01228	7.55711	8.13717	8.07189	8.3769	6.41443	9.40757	7.977	9.42978	9.32589	7.03393	4.86476	4.11308	4.8332	9.71878	6.80954	8.38215	8.6874	8.16837	7.05774	9.5033	8.67103	5.14622	7.36004	7.78469	8.10658	7.59487	6.21685	8.57088	8.38868	9.36221	9.88701	7.54616	6.33031	5.53006	8.91825	5.70627
ENSG00000158483	1.53584	1.72417	4.04963	1.1456	1.77523	2.2183	1.26376	2.86667	1.09597	2.48463	1.36315	2.13087	2.55996	3.21546	1.51649	0.848806	2.13095	0.934023	0.368146	2.19103	2.41989	1.13843	2.08764	1.62193	1.64624	2.75145	1.98326	2.36194	1.5591	2.1084	2.38327	2.03523	1.41051	2.14723	1.03748	1.28551	1.37401	1.95127	2.26686	1.74333	1.75097	2.88675	2.42478	2.05731	1.45885	0.858501	1.85834	4.37269	1.57006
ENSG00000132031	1.84217	2.52707	2.62916	0.629505	0.561184	0.995985	0.491438	0.184399	0.594309	1.81396	0.153692	0.227903	0.921969	0.656198	0.938551	1.42147	0.26003	1.47905	0.0264065	0.583206	0.188787	0.241915	1.11792	0.298864	0.977509	1.60474	0.431454	1.23278	0.525539	0.747831	0.357482	1.03162	1.76773	0.44044	2.57944	0.519634	0.316589	1.62073	0.242116	2.54981	0.651276	1.52451	1.15047	1.10836	1.15341	0.496849	0.37869	1.05579	1.30965
ENSG00000165195	1.63504	3.23392	2.67097	2.86463	2.47723	2.46956	2.76381	2.71129	2.96271	2.48518	2.97482	1.78212	2.85852	1.39769	2.16208	2.69314	2.88171	2.8869	3.06168	1.85196	2.43881	2.58624	1.61645	3.42728	2.84767	1.85838	2.4675	2.61216	2.47304	2.3301	3.16568	2.36463	2.16404	2.9219	1.69443	2.40832	2.43341	1.8159	2.45706	1.80015	2.83208	1.98083	2.83311	3.04191	1.93648	2.42194	2.25453	2.10874	2.36246
ENSG00000070444	2.29467	0.780112	1.41114	2.45805	2.05301	2.04538	2.25068	2.25874	1.88599	2.47954	2.95677	2.27206	1.91382	1.93646	2.34597	1.76666	2.44261	1.68235	2.15849	1.8125	2.29693	2.73556	2.59592	1.96876	1.76231	2.33367	1.9994	2.91978	2.6691	2.00602	2.36854	2.27841	1.82798	2.19335	2.23819	2.4999	2.19697	2.39292	2.49294	2.02243	2.80066	2.02515	2.88111	2.71322	2.08631	2.09414	1.69047	2.09469	2.08929
ENSG00000066697	3.51355	4.19198	5.12342	4.18883	4.14514	2.99033	3.21667	3.13981	3.83457	3.96475	3.43705	4.04482	3.7096	3.19981	4.08826	3.65058	3.1563	3.9352	3.78393	3.21942	3.13293	3.87584	3.65755	2.7963	2.96663	4.10848	3.95142	3.69911	2.69362	3.60197	3.48291	3.89542	3.5605	4.11646	3.8727	3.00434	3.13828	2.93326	3.53133	2.74892	3.27121	3.55267	3.77663	2.65406	2.87611	3.90369	3.46004	3.82243	3.4772
ENSG00000182613	0	0	0	0	0	0	0	0.0221382	0	0	0	0	0.16983	0	0	0	0	0	0	0	0	0	0	0	0.203859	0	0	0	0	0	0	0.0240887	0	0	0	0	0	0	0	0	0	0	0	0	0	0	0	0	0
ENSG00000083444	6.02207	4.52461	5.02927	5.29899	5.7328	5.05292	4.6846	5.91114	5.12909	5.58282	4.37784	4.73654	5.47191	5.52889	5.81654	5.29437	5.01592	5.37002	4.91641	4.64348	5.15942	4.31936	5.39666	4.56595	3.79463	5.59389	4.77652	5.45358	4.78634	5.04432	5.08514	6.20958	5.47103	5.05432	5.37166	5.01757	5.28854	5.06324	3.97339	5.29856	4.94442	5.96254	5.57244	4.92247	4.93101	6.15887	5.31857	6.2582	5.60728
ENSG00000196748	0.215858	0.214241	0.140549	0	0.353104	0.0530446	0	0	0	0.0516876	0	0.0311589	0.119218	0	0	0.426303	0	0.0417098	0	0	0.0376263	0	0.0446508	0.0767411	0.122086	0	0.0643489	0	0	0	0	0.0734743	0	0	0	0.076742	0	0.0437455	0	0	0.0651809	0	0	0	0	0.0487858	0	0	0
ENSG00000007312	2.34067	0.995878	0.516852	0.453134	0.953655	1.5017	1.7228	1.11764	0.55849	0.402122	1.00796	3.01556	1.14296	0.506498	0.699018	1.00105	2.45608	1.15845	0.747099	2.72266	0.337889	0.574617	0.751281	2.21256	0.865084	1.48252	0.656403	0.544864	0.556366	0.18758	0.375149	1.3549	0.400044	0.197756	1.58757	0.990586	0.725173	0.762435	1.2947	1.30946	0.606608	1.31609	1.59083	1.5091	3.23817	1.17817	0.514178	0.593259	1.31382
ENSG00000145982	2.59547	3.33458	3.88684	2.83216	2.93174	2.90351	3.25007	3.99907	2.25394	2.55634	4.44351	2.84037	3.17323	3.35673	3.36105	3.43671	3.34826	3.11334	2.59029	2.89	3.29233	3.28041	2.7673	2.91154	3.44716	2.37069	3.28693	2.7344	4.36809	3.91811	2.22601	2.97152	2.65219	3.66337	2.30215	3.02033	2.82585	2.81081	2.42822	2.65568	3.00908	2.5826	3.3456	4.29676	3.07996	2.86116	2.46304	3.41622	2.75355
ENSG00000181381	1.72238	1.71602	1.53838	1.00486	1.99819	2.60112	1.20892	1.96044	1.50049	1.86726	0.572819	1.70998	1.66614	1.67326	2.32478	0.871394	1.44237	1.9575	1.01003	2.03715	2.77536	2.49572	1.10659	1.30881	0.522523	1.37024	0.426424	1.74475	2.59079	1.99052	2.61913	1.09832	1.21829	1.68112	0.741359	1.32946	2.6827	2.39762	2.06908	2.40386	1.23316	2.04607	1.0925	1.52791	1.94212	2.02144	2.03632	2.12351	2.81148
ENSG00000112303	0.419076	1.1406	1.93868	0.881381	0.428551	0.511827	0.892466	0.723688	2.58939	0.513451	0.752417	0.596174	0.883311	0.285216	0.0568631	0.18854	0.839443	2.34019	0.512537	0.745619	0.706259	0.242978	0.205618	1.08542	0.416522	0.469463	0.172508	0.263843	0.665854	0.150156	0.259137	0.36168	0.0272272	1.1869	0.515633	0.59785	0.518945	0.378571	1.36782	1.90745	0.280355	0.563792	0.714294	0.563534	1.68971	0.390965	0.263825	0.312808	1.0583
ENSG00000214193	0.949525	0.972318	1.13561	2.85749	0.809563	0.340237	1.44234	1.13053	1.6245	1.77232	2.01584	1.27633	0.959116	2.09167	2.03331	1.19605	2.11412	1.16468	3.99047	1.72139	2.42589	1.4936	1.43751	0.958897	1.19307	1.99554	1.43327	1.88346	3.65418	2.51545	3.4351	3.02483	2.56133	2.28789	1.42806	2.13213	1.65848	3.21781	1.85787	0.902354	1.7568	2.41809	1.66277	2.34176	1.33474	0.948616	0.743985	1.89039	1.80972
ENSG00000142552	6.24224	5.01403	3.37844	2.65234	3.60663	4.02398	2.5959	3.40822	5.05772	6.0454	3.68728	3.75062	5.19985	4.33745	3.33675	6.67472	1.80394	3.63396	3.39902	3.89977	4.96487	2.92782	5.50387	5.44332	3.49645	5.48073	1.95958	5.44215	5.35641	4.98914	1.61183	4.75762	2.54926	3.89434	5.98656	3.47193	3.50618	4.66475	2.43114	5.467	2.63094	4.93981	4.76604	4.56152	5.21978	4.35604	3.88793	4.61769	5.12411
ENSG00000149923	5.84553	6.67749	6.23131	5.92261	5.87349	5.87255	5.24002	5.74213	5.46201	5.3986	5.63353	5.72613	5.23647	5.50496	5.71352	5.91531	5.34518	4.69547	6.24186	5.30562	5.72828	5.39568	5.53632	5.26776	5.63	4.85171	5.58352	5.12676	5.36872	5.91529	5.4229	5.29598	5.65645	5.67629	4.92579	5.06618	5.13439	5.45903	5.69249	5.03362	5.36253	5.6025	5.31519	5.60687	4.97142	5.07427	5.46647	5.34625	5.36533
ENSG00000188385	0.175833	0.0571495	0.0235186	0.196261	0.130469	0.00649432	0.0130298	0.117403	0.0127148	0.107862	0.0126048	0.1282	0.223758	0.113305	0.0149762	0.249342	0.0253214	0.321592	0.0377289	0.0257585	0.11754	0.0355392	0.972185	0.00946382	0.0370364	0.685684	1.01319	0.0445539	0.0123207	0.0136272	0.0224949	1.19948	0.0282585	0.024623	0.199983	0.230587	0.0117953	0.0525369	0.050137	0.0222565	0.211316	0.0234202	0.0328197	0.0319545	0.05338	0.00794805	0.217476	0.0280195	0.0726073
ENSG00000149925	8.01109	7.98238	8.25165	8.75154	8.48477	7.86889	7.86231	8.50625	8.46577	8.00196	8.62846	7.98741	7.81611	8.08751	8.05582	8.04155	8.50967	6.58511	8.97879	7.61564	7.96706	7.92425	8.01666	7.44386	8.09463	7.07905	8.30023	8.09652	7.39971	8.09637	7.93243	8.58097	8.16977	8.49488	7.74752	7.8937	8.34052	7.39168	8.32332	7.46643	7.72986	7.45269	7.58375	7.48728	7.24396	7.94352	8.52732	7.45088	7.96111
ENSG00000271321	0	0	0	0	0	0	0	0	0	0	0	0	0	0	0	0	0	0	0	0	0.00890349	0.00951055	0	0	0.00991499	0	0.0455247	0.00939785	0	0	0.0109808	0.0262488	0	0.0120241	0.0194235	0	0	0.0103683	0.0260278	0.00815559	0	0	0.0433592	0.0144287	0	0	0.00832629	0	0.00699042
ENSG00000144959	1.74568	3.55432	3.70404	2.71678	4.31802	4.15135	4.50835	3.00061	3.17143	2.12379	2.86802	1.47859	2.4856	1.60852	2.8106	2.17068	2.58477	3.05742	0.677134	1.56433	3.35107	2.08394	4.135	4.39198	3.56885	3.21696	2.933	1.78196	0.591357	1.88091	2.06877	3.85484	2.90938	3.87695	4.12825	2.66268	2.35647	2.52149	2.19056	2.92874	3.81793	2.53452	2.93977	2.18307	2.91142	2.0057	4.20946	2.65298	2.8761
ENSG00000139613	2.46051	1.51707	1.69541	2.66352	3.10728	2.75365	4.43193	3.76367	2.68206	2.5627	2.94516	2.4858	3.66403	2.64827	3.12598	0.467406	3.45427	3.51142	0.492943	2.6511	2.96652	2.52365	3.68938	4.12261	3.75223	3.13397	2.85309	2.76461	3.09265	2.25223	2.9204	3.43208	3.47192	3.2384	3.44412	3.35364	2.79513	3.76146	3.5434	3.18616	3.7341	2.72252	2.94948	3.81583	3.2905	3.09693	3.27362	3.25656	3.23471
ENSG00000111783	0	0.00593206	0	0	0	0	0.0048853	0.0062224	0	0.00236822	0.00354561	0.00283447	0.0522204	0	0	0	0.0162803	0.0339062	0.0121985	0	0	0	0.00814686	0.0488621	0.0190011	0.0122552	0.0466584	0	0	0.00510995	0.0042319	0.010149	0.00266487	0	0.00375443	0	0	0.00797961	0.00336217	0.00314121	0.00898103	0	0	0	0.00760417	0	0	0.00575843	0
ENSG00000197893	1.5076	0.0620428	0.106291	0.0213363	0.888318	0	0.0115515	0.0183565	0.0500452	0.0084015	0.0250222	0.00335827	0.0360289	0.0115587	2.5392	0.880467	0.00484226	0.0090063	0.0144441	5.21396	0.477218	0.0129841	1.70998	0.0250219	0.109096	2.59923	0.00700727	0.017082	0.0109226	0.00605337	1.59908	0.0080237	4.8434	0.027248	2.67822	0	0	5.35258	0.00795574	4.58177	0.256847	0.207502	2.75777	0	4.56346	2.75709	3.21751	0.82965	3.96588
ENSG00000117602	2.22608	2.16004	2.27851	3.07179	3.03885	2.46138	2.5071	2.18533	2.15463	2.45578	2.89912	2.47647	2.05498	2.41498	2.78983	0.963322	2.09007	3.16385	1.97298	2.50759	3.54751	2.1239	3.25898	2.03857	1.95772	3.20946	2.43684	2.79625	2.72844	2.23373	3.06447	2.51218	3.24962	3.13244	2.30482	2.33072	2.47235	2.88501	2.51226	2.25805	2.94362	2.89936	2.52565	2.2458	2.54027	2.77606	2.43192	2.42953	2.64425
ENSG00000054983	1.7771	2.23823	3.01836	2.75579	2.56826	1.5671	1.74836	1.53755	1.53926	2.59619	0.552959	1.17551	1.8576	2.29361	2.64651	1.95232	2.13119	1.992	0.905686	1.66698	2.18007	0.533408	1.19992	1.19457	1.29706	2.59059	0.644793	2.36122	0.541734	1.52938	1.00522	2.33379	0.541707	0.508075	2.03559	1.81009	0.658844	1.98452	1.29099	2.28233	1.02017	1.5031	1.65743	1.55281	2.0672	0.948512	0.785125	2.47691	2.34418
ENSG00000173276	0.94602	1.42759	1.6896	2.42248	2.02072	1.56832	2.61953	1.87478	1.98204	1.48526	1.97888	0.960849	1.31532	1.48641	1.90081	1.37621	2.13487	2.15099	1.06561	1.26965	2.07112	1.91731	1.96495	2.5491	2.6442	1.91476	1.48061	1.61314	1.48516	1.08372	1.46842	1.71056	1.93365	2.45224	2.10417	2.05345	1.41866	1.89732	1.77666	2.13571	2.18639	1.64757	3.03928	2.22874	2.00606	1.94743	1.7032	1.67989	1.90798
ENSG00000163376	0.241463	2.06069	0.976789	0.443762	0.640616	1.23591	0.5135	0.644633	0.86096	0.590612	0.540644	0.423111	0.390875	0.503914	1.24084	0.0727843	1.18387	1.22161	0.101607	0.558439	1.20729	0.798556	0.342156	0.635329	0.348715	0.757299	0.183132	0.5921	1.01731	0.686901	0.897245	0.857772	1.1424	1.20432	0.840918	0.622183	1.12453	0.849845	0.579726	1.20471	0.478734	0.781247	0.362468	1.49622	1.20042	0.498416	0.516307	0.621465	1.1258
ENSG00000112200	1.09953	2.401	2.03209	1.54705	1.31323	0.935342	1.86414	2.24809	0.82546	2.04022	1.709	1.23399	1.26277	1.27623	1.72613	1.24241	2.07734	2.16192	0.690634	1.31389	1.95189	1.30452	1.72252	1.31703	1.90307	1.62526	1.86122	1.64065	1.33629	1.06303	1.55208	1.72948	2.45551	1.61271	1.48443	1.416	1.30591	1.29115	1.33637	1.08861	1.7459	1.39177	1.85072	2.43001	1.51127	1.69039	1.56806	1.45858	1.64783
ENSG00000267206	0.121671	0.0471912	0	0	0	0.0671498	0.0580544	0.037258	0.0342697	0	0.0423458	0.120739	0.0769638	0	0.0225343	0.0297373	0.0958417	0.103843	0.206872	0.37735	0.01379	0.0293082	0.0325954	0.0834831	0.0153537	0.481158	0	0	0.036859	0.040731	0	0.0136342	0	0	0.184837	0.123482	0	0.0937501	0.326763	0.255194	0	0.0118249	0.0797062	0.0766685	0.159996	0.0356276	0.0509119	0.0115944	0.13483
ENSG00000108590	2.47208	4.57358	3.54996	3.05479	2.30679	2.00898	2.18419	2.20719	1.25693	1.60662	2.33107	1.92499	1.63048	1.66338	2.14901	2.41366	2.9081	2.04236	2.56464	2.48684	1.8643	2.64372	1.71106	2.56381	2.74325	2.29894	2.94839	1.67277	2.36673	2.60439	2.17783	1.96043	2.01268	2.41642	1.75638	2.25155	1.86815	1.86341	1.88229	1.89832	1.99795	1.70622	1.55447	2.04787	1.94995	1.98107	1.3749	2.75283	2.02787
ENSG00000101236	2.07445	1.59763	1.81087	1.97985	1.74199	1.59114	1.68184	1.89472	2.59656	3.59138	2.51576	1.60189	2.30052	1.86119	1.40765	1.96484	1.17303	2.09657	2.42331	2.06404	1.39602	1.7846	2.94392	2.03775	1.17303	2.28764	1.78949	2.78318	1.60111	1.11191	1.74602	2.67094	1.84815	2.60904	3.07656	2.19073	1.82759	2.12458	2.28326	2.37675	2.33336	2.45889	2.60323	2.37036	2.69626	2.17422	1.86155	1.96581	2.27576
ENSG00000099385	4.27611	4.6988	4.09286	4.0186	3.74782	3.40489	2.97519	3.6252	2.54723	3.50211	3.19165	3.67726	3.39309	3.43497	3.3108	5.8347	3.37168	2.56826	4.25143	3.20751	3.3258	3.2726	3.62027	3.04744	3.75896	2.97841	3.93568	3.3489	3.27122	3.85639	2.19511	3.26107	2.87947	3.28242	3.11033	3.0534	2.61259	3.02626	2.44756	2.97969	3.09767	3.51013	2.85782	3.28583	2.66603	3.01204	3.27453	2.79879	2.93176
ENSG00000113360	3.5462	2.62677	2.80243	2.42298	2.77097	2.63094	3.22792	3.84655	2.05585	3.29283	3.03141	2.97299	2.70089	2.68151	3.46611	2.69868	3.36431	3.2515	1.84887	2.96564	2.9666	2.31415	3.20175	3.1259	3.90977	3.2616	2.8301	3.05267	2.57993	2.48545	2.91284	3.38993	3.14016	2.70019	2.35261	3.36757	2.55753	3.08747	3.58385	2.67612	2.96213	2.46893	2.83978	3.70903	2.97167	3.10721	2.98919	3.57353	3.13361
ENSG00000161904	3.79705	1.93368	2.91914	2.73279	2.8721	2.37629	3.03787	3.51185	2.32261	3.68548	2.86975	3.64593	3.79066	3.28395	3.48119	2.88105	2.56461	2.94507	2.59355	3.0582	3.23677	3.07949	3.42513	2.31923	2.81904	3.37236	2.5298	3.22789	2.95385	2.91759	3.10038	3.13785	2.74803	2.86329	2.81523	2.97501	2.30462	3.06209	2.90513	2.3304	3.22419	3.0889	3.21641	3.55617	2.56731	3.15491	2.66838	3.47263	2.79454
ENSG00000186265	0.310412	0.0482613	0.117104	0.0650706	0.193102	0.465362	0.582911	0.104791	0.191677	0.0554525	0.0884196	0.3249	0.127689	0.112306	0.137779	0.0270678	0.559433	0.340997	0.0977538	0.748169	0.0311623	0.159169	0.073066	0.637186	0.121105	0.366878	0.0741887	0.0650247	0.0582232	0.046212	0.0534289	0.186702	0.024264	0.00849264	0.320317	0.130677	0.230405	0.159662	0.447703	0.286826	0.106189	0.104127	0.245008	0.332057	0.952832	0.140539	0.0968185	0.12175	0.310164
ENSG00000231738	0.0513164	0.0341388	0.00734137	0.0224144	0	0.00403516	0.325906	0	0	0	0.00588259	0.0047035	0.504634	0.0081079	0	0.00616881	0	0.0919513	0.0201991	0	0	0	0	0.0577729	0.00633792	0.010182	0.0195522	0.011989	0	0.0169005	0	0.0223742	0.0176081	0.0229426	0	0.00588259	0.0164493	0	0.746729	0.061336	0.0148822	0	0.0056095	0	0.0126046	0.0147676	0	0.00478246	0
ENSG00000170325	0.739603	0.744042	1.07742	1.30292	1.27643	1.07036	1.9671	1.80644	1.35109	1.01856	1.01268	1.19438	1.19088	1.13894	1.75202	0.571519	2.12828	1.52601	0.650171	1.22077	1.85864	1.39344	2.07338	1.5231	2.08161	1.53577	1.56766	1.38704	1.48314	0.732121	1.50611	1.72375	1.56783	1.8764	1.55677	1.27992	1.71419	1.85044	2.01113	1.33444	1.5864	1.54333	2.024	2.09485	1.56613	1.6871	1.51665	1.41486	1.59582
ENSG00000156467	4.62756	3.99995	4.01892	2.66786	3.1919	3.91183	3.02467	2.94111	3.61713	3.20114	3.94313	3.62163	4.167	3.52836	3.69029	5.87451	3.4958	4.40743	5.39025	4.43905	3.71423	3.72068	4.44411	3.59816	4.10237	3.23057	4.72119	4.15099	4.5173	4.91165	3.57156	3.74342	3.19893	2.52685	3.40137	3.76316	3.40227	3.22213	3.06266	3.92127	2.91872	3.01444	3.74651	3.14337	3.21611	3.89914	4.03901	3.89485	3.47959
ENSG00000165716	1.61376	0.625386	0.76668	0.800063	1.00185	0.640194	0.385504	0.679664	0.741987	2.01191	0.864691	1.92493	1.97795	0.651175	0.692917	1.58823	0.377305	1.76527	0.969759	0.935353	0.648207	0.267995	2.06421	0.44803	0.602939	1.42217	2.62379	0.576919	0.560306	0.69871	0.919651	1.80366	0.709632	0.682944	1.28572	1.17187	0.410502	0.891929	0.696351	0.972565	1.18527	0.403088	0.867077	0.934543	1.3131	0.641142	1.00751	0.780166	0.677749
ENSG00000204308	5.45346	5.10651	5.92001	5.1116	5.15273	4.09951	5.74725	5.49751	3.92395	4.86085	4.62336	5.16275	4.73108	4.55425	4.54823	4.67848	5.40476	6.03261	4.10501	4.86955	4.26308	4.18513	4.75861	4.86696	5.61025	4.69376	5.33427	3.81703	4.17477	4.38823	4.1118	4.06681	4.02757	4.34786	4.1723	4.39759	3.52496	4.27645	4.09094	3.98848	4.87332	3.82788	4.13111	4.33421	4.29112	4.84499	4.25212	4.45202	4.05151
ENSG00000169856	0.00920866	0.275621	0.0385276	0.039404	0	0	0	0.366675	0	0.0207294	0.125703	0.0049901	0.00982836	0	0.0487483	0	0.0908273	0.17081	0.0214229	0	0.0120493	0.0128699	0	0.102588	0.0464221	0.0215222	0.0207371	0.0127176	0.102245	0.0179257	0.0441192	0.216224	0.00469171	0.0717963	0.00660808	0.0248032	0.0289628	0.0821987	0.00591829	0.181939	0.0671907	0	0.0177804	0.831562	0	0.0388461	0.0280091	0.0982342	0.00946254
ENSG00000183206	0	0	0	0	0	0	0	0	0	0	0.0101132	0	0.0026646	0	0	0	0	0	0.0174052	0	0	0	0	0	0.00364072	0	0.00563764	0.00345044	0.0044017	0	0	0	0	0	0	0	0	0	0	0	0	0	0	0	0	0	0	0	0
ENSG00000173093	0.0637128	0.045431	0	0	0	0	0.0151188	0	0.00887027	0.0717954	0.0327027	0	0.0595986	0.0300996	0	0.0787518	0	0.0465959	0.0375535	0.059129	0	0.0448726	0	0.0109833	0.0582129	0	0	0.0112153	0	0.046924	0	0.0819771	0.111552	0	0.0231642	0.0327027	0	0.175292	0.0104166	0.0290059	0.00929665	0.00911011	0.0311979	0	0.0805839	0.218565	0.00993719	0.103703	0.128032
ENSG00000132964	2.48335	3.22551	3.49703	3.23366	2.64797	2.69272	2.26627	2.31065	2.29457	3.193	2.15332	2.84771	2.50655	2.17851	2.82393	1.9705	2.56357	2.59585	0.922472	2.20247	2.45327	2.75031	3.12241	2.74388	2.8402	2.22901	2.68953	2.28203	2.70907	2.43149	2.58254	2.63582	2.74181	3.17611	2.63588	2.07795	2.27883	2.19978	2.54707	2.00617	2.56766	3.11052	2.84767	2.69828	2.23052	2.27236	2.11226	2.87298	3.11172
ENSG00000183570	0.759778	0.256313	0.162254	0.643446	1.0839	0.344585	0.265649	0.848642	0.397915	0.881379	0.321157	0.958751	2.15931	0.472747	0.112884	0.668694	0.168656	0.676688	0.161041	0.567298	0.11471	0.122234	0.286171	0.455806	0.288371	0.297268	0.306537	0.198214	0.0804371	0.069493	0.0414992	1.24339	0.0288567	0.306328	0.518328	0.212741	0.0676703	0.165064	0.327642	0.308228	0.501445	0.30692	0.389553	0.267209	0.553105	1.57928	0.446328	0.0916057	0.194979
ENSG00000101680	1.36543	0.760981	1.49359	0.500879	0.837767	0.421724	0.063416	2.68643	0.407867	1.6002	0.0550683	0.880063	1.59277	1.96705	3.38566	1.69447	0.0430809	2.19164	0.0104326	0.43727	0.0785353	1.4942	0.366478	0.648781	0.125191	0.878542	1.73935	0.996723	1.71743	0.583887	1.49523	1.84097	0.278035	0.0621304	0.648861	0.62045	0.394849	0.541112	0.528787	0.642254	0.225294	0.585277	0.220874	1.67915	0.964074	1.50541	0.0916971	0.176192	2.50935
ENSG00000177257	0	0	0	4.3086	2.83271	0	0.0966673	0	0.648917	0.0937362	0.20266	0.311595	0	0.42945	0.11064	0.144632	0.659603	2.18995	1.66381	2.76118	0	0	0	0	0.0761112	0	1.06438	0.0722265	0	0	1.35641	2.97729	0.10507	0	0.564757	1.32664	4.153	0	0	0	4.64546	0.222415	0.253067	0	0	0	0.0641481	0.0577698	0
ENSG00000187325	2.45606	5.41621	2.68111	3.23897	3.15126	1.89609	3.23142	4.61928	1.96185	2.63933	2.60481	2.65656	3.66752	3.14075	3.02158	2.17583	4.52803	4.03326	1.74526	3.04464	3.20927	2.17721	3.04371	2.93656	4.18631	3.13165	2.67179	2.58239	2.22599	2.48889	3.15434	2.99173	3.26912	3.50816	2.97308	2.74525	2.28765	3.31181	2.08717	3.23777	2.93494	2.97096	2.69844	4.03675	2.70405	3.20863	3.15323	2.95337	3.3035
ENSG00000173846	2.90924	2.6777	3.68624	2.45414	2.25348	2.74898	2.98385	1.8513	4.28072	3.99683	4.26964	2.3919	2.53507	3.17636	2.87052	2.74213	3.41013	3.61666	3.11935	3.42367	4.34575	4.94547	2.59064	2.33739	2.38933	4.51917	2.38673	3.61049	3.9139	3.06124	3.14139	3.25303	3.12394	3.57946	3.72504	3.58101	2.63477	3.77959	2.72244	3.31284	3.38289	3.67434	2.97817	2.62238	3.69742	1.99202	2.67264	2.34873	3.57219
ENSG00000149927	0.386166	0.0553934	0.103788	0.158499	0.0920954	0.0127869	0.0205152	0.15583	0.00302086	0.256074	0.156116	0.0178583	0.326446	0.020528	0.0177141	0.0876692	0.0383699	0.629151	0.0877897	0.0798059	0.138155	0.0754449	0.197174	0.474668	0.24455	0.0193564	0.343571	0.0227787	0.0385456	0.0161198	0.0265947	0.574665	0.0223501	0.0194696	0.0996502	0.0223097	0.0277754	0.0457222	0.164372	0.0425186	0.347608	0.0031027	0.00712815	0.0884539	0.0160065	0.0187496	0.0694694	0.0914425	0.0448004
ENSG00000168303	2.2756	3.50197	3.48717	2.68675	2.04785	2.26137	1.46377	2.42396	1.89226	2.15429	2.29423	1.92698	2.5326	1.69589	2.16751	2.65079	2.42273	2.47329	2.16397	2.19932	2.30248	2.17	2.22554	2.01229	2.17427	2.33372	3.18146	1.68432	2.43508	2.35203	2.05113	2.02368	2.29151	2.11735	1.68797	1.55766	1.42549	2.30012	1.9519	1.80608	1.98109	1.30793	2.27052	1.76693	1.69877	2.66167	1.67136	2.42233	1.62673
ENSG00000204022	0.0233742	0.00444544	0.00662477	0.0202367	0.0333517	0.00364088	0.0433267	0	0.00428523	0.0141327	0.0105968	0.0294491	0.0125233	0.0145964	0.0250751	0.158304	0	0.0504993	0	0.0144832	0	0.0109501	0.00610637	0.021116	0.0114156	0.063127	0	0.0215604	0.00691343	0.0228235	0.0126419	0.0101356	0	0	0.00562054	0.0315597	0.00496642	0.0119372	0.0150486	0	0	0.0131638	0.00506165	0.00417007	0.0170309	0.00668014	0	0.00861765	0
ENSG00000111785	1.24454	1.52543	1.20624	1.43656	1.25932	0.857343	1.7131	1.26592	0.62049	0.988088	1.11138	0.683298	1.78425	1.20133	1.34168	0.492061	1.65097	1.58954	0.410128	1.08367	1.11508	0.944842	1.52973	1.79442	1.84349	1.20571	1.36753	1.10296	0.972804	0.95962	0.896432	1.53414	1.46805	1.38255	1.14902	1.17022	0.957147	1.54878	1.29614	0.979012	1.39316	0.779917	0.961476	1.54608	1.4239	1.40447	1.10713	1.3219	1.36167
ENSG00000124900	0	0.0109626	0	0	0.0165829	0	0	0	0	0	0	0	0	0	0	0	0	0	0	0	0	0	0	0.0130841	0	0	0	0	0	0	0	0	0	0	0	0	0	0	0	0	0	0	0	0	0	0	0	0	0
ENSG00000126562	0.12703	0.0846217	0.208661	0.33793	0.0986216	0.171085	0.100759	0.123398	0.258051	0.428657	0.0782758	0.0483432	0.0548986	0.0258731	0.0659855	0.105239	0.418522	0.251177	0.063877	0.354223	0.147782	0.481892	0.73485	1.10512	0.217319	0.19173	0.0157157	0.107061	0.0662806	0.0924927	0.129576	0.244952	0.0176675	0.107291	0.252202	0.336145	0.167011	0.057498	0.0657762	0.26359	0.602948	0.0271965	0.0704374	0.56969	0.0301688	0.058378	1.40072	0.166852	0.291635
ENSG00000113441	2.18726	1.97119	1.73919	2.12856	2.19339	2.44518	3.3659	2.35058	2.00821	1.46654	1.56895	1.91021	2.24832	1.39684	2.28209	1.84408	2.177	2.74412	0.844841	1.97555	2.36928	1.7462	1.71077	2.77777	2.36308	2.24524	1.90453	2.00763	1.85831	1.77931	1.6612	3.07084	2.11392	2.24846	2.39239	1.97456	2.56229	2.44284	2.66259	2.25584	2.64375	2.15148	2.5781	2.75413	2.63715	2.59741	2.54749	2.21585	2.6555
ENSG00000179165	0.0497491	0.0377559	0.0282472	0	0.0428421	0.0233023	0.135181	0.019927	0	0.0227002	0	0.0360638	0.070305	0.0156708	0.070683	0	0.0131109	0.106374	0	0.0309327	0.043534	0.0578507	0.0389037	0.0226665	0.0952568	0.0390684	0.0189486	0.011618	0.0148095	0.0485875	0.0135731	0.0324053	0.0170642	0.0295714	0.0358406	0.0113779	0.0212158	0	0.0635662	0	0.0287014	0.00943748	0.0108507	0.00894253	0.0122146	0	0.0102942	0.0275839	0.00864353
ENSG00000082515	2.63775	3.56728	3.20013	2.68172	2.41325	2.61868	2.28142	1.87434	1.60078	2.10736	2.37289	2.0249	2.22884	2.07774	1.95751	1.95163	2.59681	2.75794	1.9423	2.20967	1.79136	2.56775	2.12982	2.3808	2.72846	1.55267	2.44065	1.75084	2.07195	3.00667	1.6669	2.29909	1.5758	1.80348	1.80738	1.75289	1.85389	1.25441	1.91816	2.0333	2.23491	1.52248	1.77154	1.83819	1.96572	2.29575	2.43124	1.75794	2.30366
ENSG00000130287	0	0.00291667	0.00434767	0.00444776	0.00882311	0.00477318	0.00479913	0.00305958	0	0.0139025	0.0412515	0.0111057	0.0245342	0.0143587	0.0055184	0.0145555	0.0159942	0.142509	0.0060044	0	0.0431986	0.0107716	0.00400721	0.041251	0.0186675	0.0120396	0.0401952	0.0212101	0.179253	0	0.00415724	0.0588137	0	0	0	0	0.00325869	0.0117426	0.00659813	0	0.0691166	0.00864577	0.0099408	0.00546664	0.0222954	0.00875479	0.00629407	0.00283122	0.010548
ENSG00000135905	0.577626	0.580196	0.193003	0.472278	1.27743	0.859825	2.2215	0.838568	1.67187	0.383105	0.304876	0.628658	0.93429	0.547845	1.25526	0.237272	1.19346	2.24833	0.397825	1.3635	0.36614	0.847771	0.700319	2.29698	1.2049	1.82332	0.854798	0.759724	0.741804	0.57894	1.09269	1.28838	0.574941	0.382706	1.87358	0.997879	1.46599	0.748462	1.59434	1.61372	1.32814	0.815736	0.805615	1.11397	2.48591	1.52237	1.00979	0.878514	2.14167
ENSG00000011677	0.672503	0.222351	0.285331	1.07969	2.26711	1.28411	0.422454	0.911518	0.667088	0.445137	0.110513	0.765461	1.28345	0.615973	0.388737	2.13828	0.180274	0.232967	0.0390997	0.322621	1.78612	0.250035	2.03758	0.796098	0.072411	1.16924	1.29609	2.36806	0.396626	0	0.484587	2.09809	0.219709	0.0588635	0.845347	0.809275	0.697677	1.62367	1.18873	0.705905	0.54727	2.09751	0.194373	1.03804	0.238213	0.829312	0.662857	0.0231483	1.11513
ENSG00000117682	2.76969	2.62095	2.6688	2.69911	2.87715	2.5499	3.14414	3.22233	2.51422	2.78459	3.0235	2.66712	2.34277	3.13889	3.11055	3.22283	3.24495	2.87417	2.80107	2.8125	3.95611	2.64229	2.8072	2.98324	2.86904	3.3863	1.95368	3.23224	3.2527	3.04762	2.75578	3.19408	3.17	3.26312	2.79779	2.92439	2.86024	3.06376	3.09944	2.64135	3.06564	3.75169	2.89501	2.6058	3.08111	2.47579	2.82158	3.174	3.15237
ENSG00000154493	0.040048	0.00765236	0.022706	0.00584148	0.0173389	0	0.055757	0.0120233	0.0256557	0.00610574	0.0495436	0.00365761	0.0321524	0.00630665	0	0.0379417	0.00527363	0.0625876	0.0235256	0.0124882	0	0	0.0157321	0.0758661	0.0485503	0.077321	0.618846	0.00932833	0	0	0	0.0260557	0.00686944	0	0.0288246	0.080208	0.00428036	0.01541	0.012976	0.0161453	0.0154221	0.00757643	0.0173712	0	0.0243954	0	0.0568825	0.00742851	0.0309645
ENSG00000174197	1.04368	0.834279	0.980301	1.64093	1.95462	0.919371	2.21958	1.95736	1.12568	1.47559	1.17421	1.16993	1.3622	1.59597	2.03523	0.871101	2.30744	2.63174	0.577944	1.36528	1.86746	0.849851	2.01012	2.76838	2.90057	1.77373	1.41027	1.67444	1.60201	0.850494	1.21251	2.02345	1.81503	2.1682	1.83003	1.67952	1.7886	2.30135	2.3185	1.59911	2.54542	1.39178	1.50644	2.52118	2.03779	1.72929	1.83726	1.60383	1.88186
ENSG00000175643	2.88005	3.02036	2.51067	2.62719	4.64533	3.29564	4.97237	3.625	1.49069	3.49111	3.3313	2.78802	3.97879	2.40255	2.93221	2.81956	5.0499	4.33366	2.36388	2.58249	2.05313	2.23976	4.35587	4.8218	3.96434	2.19463	3.07361	2.54285	1.66274	1.6825	1.66399	3.0248	2.9105	1.85853	2.18898	1.63273	2.01463	1.93377	2.6506	2.70677	4.4641	1.90711	2.37059	2.11724	1.38542	3.21989	3.861	2.73979	2.28368
ENSG00000100626	0.161794	0.0130055	0.0248353	0.0141679	0.192989	0.0347254	0.126428	0.100205	0.0650717	0.12809	0.0395771	0.113041	0.0415744	0.0661076	0.157225	0.0254899	0.0480261	0.406209	0.0228946	0.402101	0.0214032	0.00230194	0.050411	0.843334	0.058836	0.498229	0.040374	0.0470293	0.0653126	0.0690389	0.00796182	0.10878	0.114272	0.0317159	0.192011	0.103218	0.0186477	0.402894	0.161789	0.385809	0.28794	0.0632637	0.214854	0.173007	0.892328	0.0496559	0.0746463	0.026921	0.37353
ENSG00000206260	0	0	0	0	0	0	0	0	0	0	0.169955	0	0.31779	0	0	0	0	0	0	0	0	0	0	0.0297524	0.124082	0	0	0	0	0	0	0.110642	0	0	0	0	0	0	0	0	0	0	0.0562172	0	0.153001	0	0	0	0
ENSG00000066777	2.39161	2.39602	2.31833	1.92107	3.11804	2.71671	3.36539	3.20094	2.90693	2.85846	2.50397	2.28769	2.45519	2.25881	3.62894	2.4698	3.49457	3.2202	1.3319	2.43014	2.90332	2.41934	3.31621	3.35569	3.75939	3.23915	3.12401	3.79189	2.95662	2.34192	3.05377	3.5608	3.05298	2.27742	3.16053	3.40503	3.19649	3.67428	3.40416	3.29449	3.1778	2.97442	3.38	3.38176	2.93324	3.11958	3.16843	3.08795	3.44038
ENSG00000136631	2.71519	2.83119	2.88489	2.31718	2.5426	2.70967	2.80051	3.10689	1.79287	2.20778	2.52549	2.37698	2.89218	2.53093	2.22283	3.0717	3.05771	2.95398	1.78901	2.58437	2.79766	2.27004	2.37477	2.67687	2.71947	2.88104	2.79433	2.5954	1.83885	2.37769	2.0432	2.50652	2.44465	2.52117	2.23104	1.99562	2.1861	2.25214	2.18535	2.26271	3.02755	2.20547	2.10987	2.42278	2.37978	2.61221	2.56678	2.51926	2.62823
ENSG00000196338	0.183186	0.0494667	0.0149329	0.14593	0.145009	0.141197	0.156871	0.0920285	0.0984315	0.130376	0.164562	0.110922	0.441527	0.0569005	0.083318	0.132419	0.13235	0.388134	0.0609222	0.170498	0.106446	0.107695	0.287516	0.217215	0.081837	0.382209	0.314398	0.112151	0.0155816	0.0342602	0.0142811	0.475578	0.0224068	0.0615535	0.297989	0.258001	0.113504	0.135676	0.125471	0.266621	0.326263	0.0823073	0.222618	0.226676	0.368282	0.0665539	0.11991	0.191827	0.130751
ENSG00000115221	4.06265	5.44861	6.82022	3.42848	7.14949	2.88757	4.1302	3.46169	4.49402	6.14867	2.9469	5.03237	2.6912	4.19464	5.6882	3.82424	4.83072	4.44558	2.84198	4.77327	3.78288	4.82714	2.90837	0.688623	3.64035	6.31314	2.44389	5.05908	3.07578	4.15215	5.09025	3.54706	5.19611	5.04428	3.21412	2.71563	1.31811	4.63979	5.15178	3.69796	4.46232	5.05975	4.92909	5.95355	3.606	5.80457	5.02915	0.321518	5.5406
ENSG00000184979	4.53089	2.77571	1.78131	1.47641	3.66209	3.41596	4.32259	3.3907	1.84556	2.73852	2.02058	2.12795	3.53374	3.00325	3.03067	0.785364	1.97736	3.63501	0.636533	3.09288	3.33085	3.20913	2.27858	4.44355	3.63377	2.16316	1.64788	1.05156	3.46767	2.67123	2.37135	2.78823	1.70312	1.71645	1.8474	1.35177	3.67483	1.71349	2.04598	2.15426	2.67618	3.24789	0.780394	1.85949	2.19468	2.91727	3.23187	2.5868	4.13705
ENSG00000164404	0.134536	0.0542992	0.106037	0.0996642	0.0902985	0.0926102	0.0883455	0.0569106	0.0235126	0.0434653	0.112957	0.0743505	0.158827	0.0692178	0.034513	0.0895796	0.175195	0.348563	0	0.223043	0.0693407	0.0300424	0.0741151	0.303511	0.114067	0.156664	0.257597	0.142688	0.0654794	0.0417472	0.0684848	0.0278213	0.0647378	0.0379115	0.0307758	0.0785984	0.00685369	0.11145	0.151871	0.142356	0.218625	0.0537689	0.0948406	0.0398133	0.0541709	0.0365181	0.0328315	0.109155	0.0439123
ENSG00000111684	1.74775	1.78855	2.16774	1.6585	2.9188	3.08324	2.52052	3.06923	1.71519	2.07457	2.75354	2.7659	4.04107	1.5768	2.69166	0.161628	3.11251	2.50896	0.189263	1.73142	2.81859	1.98441	2.9469	2.90748	2.46917	2.466	2.35863	2.11058	1.88835	1.56363	1.78313	3.02287	3.00411	2.53136	2.08388	2.9569	2.35639	2.32565	3.71166	2.39813	2.83787	2.80181	2.06449	1.79906	2.04196	2.8073	2.86474	2.32077	2.82873
ENSG00000171243	2.19811	0.358991	0.305629	0.08454	0.095605	0.534839	0.698965	2.00832	0.251727	0.673381	0.404857	1.79739	2.54122	0.878017	0.657946	1.6234	2.03187	0.257826	0.0816462	2.46142	0.193615	0	7.02302	0.39748	1.32087	2.67129	6.13167	0.534049	0.0251568	0.453989	0	1.21207	2.88053	0.0623026	1.48966	1.07046	0.0536445	1.42277	0.736001	0.139646	1.14055	0	0.688265	0.232539	0.994877	0	0.25002	0.039032	0.0579401
ENSG00000267041	0.190707	0.353546	0.336654	0.273972	0.0384079	0.105398	1.06775	0.494636	0.0582203	0.329918	0.170496	0.157761	0.395218	0.0580514	0.281842	0.344616	0.689635	0.754647	0.0570744	0.16635	0.209524	0.00947916	0.406427	0.471928	0.105151	0.275106	0.282814	0.399633	0.0237869	0.0733006	0.162599	0.462785	0.408709	0.293044	0.263504	0.181357	0.0255983	0.448086	0.159541	0.289532	0.396767	0.196958	0.0961647	0.356714	0.354509	0.323821	0.0301983	0.0657837	0.103302
ENSG00000111530	3.0283	3.84036	3.07414	3.72253	3.6628	3.76504	4.05742	3.90907	3.04338	3.1422	3.01886	4.35928	4.28736	2.93219	3.4871	4.77723	3.96209	3.56561	2.21873	2.97736	3.56786	3.33126	3.877	3.93115	3.92386	3.20293	3.38342	3.41884	3.22958	2.6718	3.43806	3.85716	3.91895	4.00777	5.38973	2.84152	3.92511	3.75326	3.42619	3.80986	3.95319	3.47463	3.56345	4.02385	3.48085	3.8317	3.99532	3.24491	3.65829
ENSG00000120457	1.70304	0.150295	0.140571	0.0348218	0.384145	1.38547	1.75552	0.144807	0.533649	0.479243	0.110005	0.389648	1.44873	0.294093	0.298169	0.0447702	0.203148	1.49064	0.231947	0.836111	0.0851314	0.190525	0.99755	2.33599	0.937801	0.613943	0.0453511	0.0475107	0.169429	0.0988435	1.28209	0.384822	1.00424	0.0102727	1.64189	0.489908	1.7001	0.589745	0.536816	1.55867	0.267097	0.500224	0.557302	0.212593	1.18106	0.84645	1.8936	0.317833	1.00558
ENSG00000187486	0.614396	0.0494788	0.0820753	0.238381	0.204185	0.0654667	0.281465	0.108063	0.133157	0.106371	2.2576	0.282736	0.382853	0.19372	0.420757	0.163747	0.303631	1.80753	0.238497	1.45396	0.145114	0.119208	1.09284	0.99259	2.24102	0.386285	1.03126	0.0378718	0.632146	0.0636002	0.128671	0.219586	0.570801	0.70199	0.732903	0.0589044	0.108323	1.06892	0.142386	1.06283	0.693263	0.208452	0.467237	0.28795	0.900774	0.343595	0.271784	0.282033	0.55629
ENSG00000100122	0.393082	0.887205	0.226756	0.107539	0.386813	0.208815	0.393057	0.180178	0.384679	0.0986691	0.145378	0.354356	0.37687	0.170371	0.163584	0.62299	0.166383	0.237441	0.143433	0.413221	0.0620547	0.0876133	0.393644	0.203459	0.218107	0.423641	0.139024	0.148305	0.109626	0.120829	0	0.266372	0.0163252	0.136236	0.597646	0.105314	0.136432	0.206174	0.100044	0.555397	0.442271	0.202451	0.26565	0.207418	0.792346	0.131389	0.908176	0.229366	0.746917
ENSG00000092529	0.270035	0.079758	0.111444	0.0706768	0.131218	0.0314593	0.129069	0.0445809	0.0206525	0.134633	0.0850779	0.346312	0.164962	0.0962653	0.307945	0	0.141431	0.186666	0.0524043	0.880598	0.259441	0.352717	0.119484	0.0605708	0.122421	0.468877	0.301814	0.205712	0.252071	0.336604	0.455368	0.474627	0.539763	0.147276	0.174604	0.228376	0.251617	0.9874	0.346024	0.846105	0.38771	0.0337857	0.316501	0.171555	0.631064	0.0881221	0.24392	0.206525	0.432788
ENSG00000112818	0.0353683	0.0400301	0.188865	0.0102851	0.0404414	0.177014	0.0759365	0.102709	0.0823749	0.0372786	0.0554818	0.0631773	0.0500847	0.0969771	0.062675	0.0662501	0.0548442	0.0511431	0.0138749	0.064872	0.0309306	0.0411613	0.0184773	0.0632356	0.0258878	0.171483	0.0529844	0.0245447	0.0104917	0.0571133	0.0933786	0.075276	0.229638	0	0.0668805	0.0862533	0.116146	0.0448295	0.186602	0.142986	0.060243	0.0133338	0.0153273	0.133252	0.171596	0.0401317	0.0851336	0.119664	0.14015
ENSG00000113492	0	0	0	0	0	0.0969139	0.0167011	0	0	0	0.00608014	0	0.0143396	0	0	0.0127239	0	0	0	0.127608	0	0	0.00699421	0.00608007	0.0130718	0	0	0	0.00791829	0	0	0.0173756	0	0	0.0128472	0	0	0	0.0229264	0	0.0153804	0.00504164	0.00579791	0	0	0	0	0	0.0229382
ENSG00000056972	3.13977	2.73449	3.03899	3.22275	3.43762	3.81497	2.61579	2.80036	3.68805	3.31172	3.97001	3.94755	3.46077	3.9086	3.45502	2.07318	3.36301	2.90815	3.0735	3.54087	3.9703	4.30702	2.12876	1.81932	2.93497	3.4955	3.26933	4.0313	3.58412	4.19164	3.74123	3.36557	3.79965	3.75745	2.66275	3.51508	3.8545	3.12081	3.97741	3.29332	3.20169	3.62297	3.07285	3.20705	3.46938	3.33324	4.39022	3.6307	3.73379
ENSG00000143157	2.53689	2.0729	2.67807	2.67313	3.66877	2.45245	3.24584	3.91752	1.99563	2.72668	2.86994	2.81651	3.895	3.25327	2.81479	2.26679	3.08343	3.56467	0.984292	2.51082	3.38547	2.49909	3.55555	2.9065	3.4346	3.45317	3.18098	3.50411	2.6656	2.40495	2.47857	3.13524	3.17132	3.58699	3.28286	2.86134	2.5955	3.11985	3.18385	2.82692	3.58782	2.7976	2.80071	3.63627	3.08418	2.95811	2.9593	2.81792	3.05691
ENSG00000181371	0	0	0	0	0	0	0	0	0	0	0	0	0	0	0	0	0	0	0	0	0	0	0	0	0	0	0	0	0	0	0	0	0	0	0	0	0	0	0	0	0	0	0	0	0	0	0	0	0
ENSG00000275778	0.260721	0.084684	0.174792	0	0.0372831	0.0402412	0.0990923	0.0386895	0.0119604	0.086764	0	0.0921486	0.573342	0.0203831	0.0234046	0.0460798	0.0339167	0.248909	0	0.0401711	0.056463	0.0304374	0.0669235	0.0725548	0.0159482	0.34281	0.048863	0.044887	0	0.123335	0.0176586	0.0829618	0.0548539	0.165316	0.14957	0.014806	0	0.0494598	0.172688	0.051791	0.0125347	0.0365409	0.0692606	0.0116398	0.0158934	0.0907727	0.0266713	0.0708004	0.108746
ENSG00000173473	3.21229	2.83661	3.20416	3.35881	3.65813	4.44951	4.6331	4.88535	3.534	4.13878	3.6455	3.45783	4.58718	3.46664	5.35317	2.92272	5.02106	5.07974	1.7444	3.30715	3.90356	4.00789	4.46991	5.16697	4.70191	3.55944	3.77503	3.86168	4.30515	2.79767	4.1524	4.44731	3.96509	4.21181	3.82959	4.3412	4.16296	3.83883	4.41724	4.04544	4.58765	3.96634	4.0107	4.80608	3.63755	4.07135	3.77299	3.89081	4.5414
ENSG00000142875	1.82167	2.94882	2.1304	2.24435	2.5979	1.78794	2.6354	2.29376	2.20556	1.91906	0.704808	1.58685	1.73157	2.87083	2.7223	1.77023	2.0545	2.92228	1.33289	2.1244	1.82296	1.52542	2.11543	2.52211	2.80285	3.29343	1.80444	2.54778	0.532063	2.36712	2.16981	2.02887	1.80995	0.81735	2.55894	1.72311	2.81494	1.65634	2.18391	2.48435	2.22837	2.52786	1.65295	2.07833	2.83133	2.83571	1.10927	2.06155	3.13534
ENSG00000016602	2.91124	0.211763	0.187838	1.37274	3.47662	3.97888	3.70205	3.25841	2.85452	0.532199	3.94625	1.62569	0.446426	0.816719	0.27176	3.61927	4.56716	3.0675	0.415954	4.19451	0.590572	1.71672	0.181067	0.436659	1.03107	2.59562	1.09215	2.21236	0.808082	2.59815	0.460212	0.983353	0.125591	0.196155	1.18048	4.79605	0.95095	1.26124	6.80804	3.44277	5.00584	0.24931	1.35642	1.56845	4.48888	0.249739	5.17635	0.658507	0.722869
ENSG00000168172	1.30704	1.80308	2.03107	1.22179	1.63091	1.48111	2.07916	2.04912	1.54605	2.37105	1.84818	1.94285	1.83857	1.17282	1.65614	1.39376	2.75447	2.4153	1.2351	1.38666	2.46592	1.43359	1.87079	2.2408	2.94419	2.52562	2.13723	2.37358	1.6472	1.20389	1.5084	2.10403	2.13331	1.98963	2.67175	2.12939	2.29368	2.24523	1.90013	2.39585	2.07631	1.5999	3.10368	2.61553	2.31601	1.81855	1.98068	1.64092	2.20035
ENSG00000109606	3.30586	3.97832	4.30762	3.45593	3.49447	4.02798	4.57796	4.06805	3.15083	3.47433	4.14808	3.58094	4.18987	3.85289	4.46217	3.29143	4.56529	4.7766	2.84218	3.91324	4.6703	4.33235	4.18726	4.49852	4.50507	4.11083	4.01836	4.46867	4.15998	3.76772	4.02742	3.85618	4.18338	4.18019	3.83297	4.16692	4.05269	4.29182	4.29284	4.13853	4.31948	3.95271	4.28581	4.52478	4.73407	3.73468	3.94206	4.05078	4.2786
ENSG00000183066	0.034124	0.057555	0.139032	0.100909	0.253282	0.0290857	0.282061	0.0203881	0.0311062	0.141146	0.0270198	0.0728669	0.137602	0.0527675	0.0426078	0.422116	0.448197	0.58382	0.134691	0.102893	0.203541	0.0279156	0.124493	0.12674	0.419635	0.116723	0.148259	0.12931	0.00506861	0.0497004	0.00927341	0.151937	0.0375653	0.0500753	0.111139	0.0422355	0.0108941	0.0261097	0.106785	0.0441854	0.161953	0.0538856	0.0475057	0.0511004	0.0654385	0.0949235	0.0519133	0.0650088	0.0176347
ENSG00000234409	1.22785	0.199949	0.126034	0.180684	0.0562516	0.0606833	0.138533	0.0647001	0.224756	0.188362	0.087691	0.20196	0.54709	0.194174	0.158232	0.12119	0.0343361	0.265293	0.0510833	0.0406669	0.0849064	0.119495	0.268216	0.0445111	0.109406	0.62589	0.0249441	0.240402	0.218263	0.257969	0.120731	0.525563	0.170649	0.0953103	0.151347	0.310605	0.0821943	0.461194	0.149182	0.0779437	0.30866	0.153868	0.213306	0.156823	0.38165	0.0739608	0.154914	0.183722	0.141501
ENSG00000215915	0.723381	0.46422	0.708601	0.174657	1.11186	1.25174	0.209441	0.818192	0.135198	0.88254	0.762851	1.24828	0.512918	1.25331	0.30211	1.02161	0.195604	0.64474	1.14377	0.284889	0.993334	1.03859	0.88765	1.50945	0.278108	0.360414	0.153353	0.238841	0.855687	0.598865	0.176707	0.794647	0.610452	1.22281	0.300019	0.726711	0.0280538	0.745483	0.266637	0.561664	0.388402	0.619043	0.277552	0.236355	0.709824	0.0524127	0.484025	0.0719989	0.256219
ENSG00000085999	1.73694	1.62679	1.34721	1.91379	2.42891	1.92052	3.36925	2.12853	1.06949	2.21285	1.82204	1.36169	2.58055	2.25186	2.34898	1.0059	3.2788	3.57731	1.003	1.05726	2.74307	2.14257	3.44334	2.49709	3.203	2.22778	2.04694	2.54976	1.98273	1.75501	1.68746	3.32401	2.12229	2.81721	1.63578	2.0143	1.69645	1.82442	1.24773	2.08737	2.66366	1.73375	2.18665	2.4457	1.05059	2.82202	2.2916	1.80036	2.4901
ENSG00000280148	0	0	0	0	0	0	0	0	0	0	0	0	0	0	0	0	0	0	0	0	0.0154862	0	0	0	0	0.0276352	0	0	0	0	0	0	0	0.0414962	0	0	0	0	0	0	0	0	0	0.0125849	0.0171818	0.0201249	0	0	0.0121647
ENSG00000110172	1.4807	1.97062	2.22199	1.23553	1.08615	2.55726	1.14917	3.1691	1.34036	1.90269	2.01453	2.31142	1.40058	1.69435	2.43254	2.86079	2.224	2.27405	0.665849	2.09185	2.61031	1.98938	3.45877	1.86868	1.58994	2.09859	2.33749	1.68576	2.25779	2.55225	2.55192	2.23776	2.87933	1.72537	1.72571	1.79961	2.31321	2.24032	2.50293	1.748	1.53153	0.636387	2.28919	2.96077	1.23106	2.2531	1.64977	2.19205	2.26934
ENSG00000165646	0.099925	0.117283	0.0849158	0.319728	0.578116	0.201359	0.243745	0.453745	0.552812	0.137444	0.0739582	0.200075	0.233214	0.138107	0.0983752	0.0121925	0.110109	0.324235	0.0200045	0.248874	0.0876291	0.0532988	0.0332008	0.460787	0.602979	0.300369	0.121455	0.343209	0.192025	0.0577512	0.0344308	0.58043	0.121898	0.17248	0.269837	0.716637	0.356269	0.496116	0.444289	0.449523	0.541249	0.42809	0.392315	0.212722	0.951719	0.133294	0.237946	0.186635	0.512838
ENSG00000184014	2.54469	2.51762	2.81685	2.7715	3.12827	2.26772	3.28938	3.20602	2.95397	2.78668	3.51715	1.88549	2.70125	1.77955	2.76655	1.1109	2.34263	3.77915	1.44447	2.11023	2.97605	2.5042	3.94631	3.72555	3.20916	3.31752	3.00804	3.14761	2.09495	1.6623	1.97484	3.7156	2.34831	3.7319	3.29438	2.18563	2.16327	2.47315	3.11962	2.88402	2.12917	2.45905	2.74517	2.57692	3.09526	2.84632	2.76412	2.22057	3.4102
ENSG00000113732	7.24895	7.12446	7.19028	6.59623	6.68679	7.5589	5.96077	6.17484	6.42556	6.58443	6.64863	6.76797	6.03888	6.23187	5.53074	6.72387	6.04856	6.02246	6.41478	6.58711	5.81757	6.68064	6.46176	6.52775	6.46796	6.23903	6.40595	5.97732	6.06699	6.79502	6.00871	6.34344	5.78812	6.43765	6.55997	6.17895	6.01973	5.73621	6.32498	6.59048	6.08677	6.0733	5.78004	6.06894	6.10838	6.31531	6.04934	5.95712	6.3425
ENSG00000138152	0.736406	3.61196	0.153938	0.157301	0.0742533	0.105795	0.0804884	0.118093	0.167566	0.250835	2.69606	0.255866	0.177931	0.0408307	0.062114	0.376611	0.626575	0.143115	0.163103	0.718612	1.58156	0.156666	0.243178	0.0297157	0.0214092	0.179226	0.0969365	0.0795281	2.7567	0.0143598	0.114791	0.308976	0.228979	2.8326	0.13159	0.437005	0.0278182	0.977795	0.064944	0.0350326	0.255383	0.0489347	0.083424	1.07814	0.162454	0.073691	0.17856	0.175894	0.116683
ENSG00000102921	3.4982	3.31683	3.674	3.46203	3.06251	4.24855	3.50821	3.64394	4.03856	5.46281	3.64455	4.50366	3.27103	3.78648	3.91007	3.03194	3.97901	3.08109	3.49227	3.73808	4.26676	4.29475	3.68928	3.25656	2.62775	4.01321	3.09615	3.64709	3.9942	3.39812	4.48953	3.74201	4.24532	3.72231	4.26085	4.00135	4.13557	4.55318	4.3377	3.41496	4.27506	4.35954	4.14186	3.07819	4.205	3.89489	3.9098	4.16426	4.09194
ENSG00000167311	0.159153	0	0.0694225	0.0180762	0.278484	0.0574114	0.37777	0.0612162	0.0563435	0.127315	0.042099	0.0775446	0.128795	0	0.0224021	0.367195	0.0163258	1.50263	0	0.545263	0.0272886	0	0.0483382	0.549813	0.226724	0.597689	0.114241	0.111879	0.0184382	0.118222	0.0336057	0.349066	0.0525285	0	0.27387	0.148703	0	1.98106	0.0915483	0.375479	0.212433	0.0117553	0.142116	0.0762269	0.289931	0.0354195	0.0506161	0.0567313	0.172934
ENSG00000143178	1.00519	0.311957	0.381681	0.982799	0.606591	0.304855	0.965404	0.278622	0.344387	1.15399	0.302644	0.624188	0.837193	0.559196	0.343092	0.402262	0.674707	1.38781	0.512382	0.573906	0.890944	0.682936	1.27613	0.561647	0.494997	1.0111	0.450807	1.21864	0.460193	0.534811	0.528628	1.40122	0.331016	0.46784	0.916013	0.534559	0.233321	0.814097	0.688733	0.391939	0.698927	0.295851	0.526799	0.323743	0.533283	0.748408	0.482694	0.758539	0.459564
ENSG00000163464	0.083319	1.26551	1.81952	0.50579	0.278358	0.655204	0.102967	0.352672	3.30193	0.649685	1.08883	1.49994	1.43458	1.78361	1.35212	0.126262	0.388899	0.0906259	1.65668	1.98417	0.208814	0.851381	0.0759239	0.0845748	0.0207087	0.55105	0.0476845	0.604682	0.264318	0.3676	1.33896	0.23047	2.6397	1.73328	0.118026	1.09337	2.00672	0.619925	1.25116	1.04938	0.125383	0.590737	1.21267	1.14513	1.52256	0.455905	0.10139	3.42597	0.723953
ENSG00000167178	0.737024	0.168235	0.158517	0.116193	0.561288	0.165942	0.496774	0.247825	0.264122	0.203641	0.110144	0.202721	0.402032	0.814326	0.125765	0.716051	0.0448038	0.544258	0.0402911	0.497588	0.131281	0.00407316	0.485215	0.171003	0.298586	1.39319	0.814174	0.364851	0.0993638	0.0721515	0.0187254	0.229799	0.154524	0.0154018	1.52761	0.124697	0.0472186	0.662408	0.076524	0.349182	1.18007	0.262495	0.241953	0.191297	0.590042	0.21219	0.352885	0.114047	0.229381
ENSG00000260092	0	0	0	0	0	0	0	0	0	0	0	0	0	0	0	0	0	0	0	0	0	0	0	0	0	0	0	0	0	0	0	0	0	0	0	0	0	0	0	0.0100029	0	0	0	0	0	0	0	0	0
ENSG00000092054	3.08416	0.217843	0.0389835	0.0200728	0.489145	0.0161797	0	0.0843463	0.125289	0.0105262	0.00395047	0	0.00932621	0.0162775	2.31175	1.26677	0.0181302	0.0541914	0.0601576	5.07665	0.621456	0	2.43253	0.0274284	0.10678	2.32802	0	0.00403405	0.0102735	0.0113638	1.13627	0.0225219	4.3969	0.00516405	2.56462	0.00789014	0.00369605	3.83457	0.0443239	5.47122	0.642774	1.2215	1.77442	0.0061997	4.70819	3.10817	4.62733	1.86947	4.71411
ENSG00000088356	4.42592	4.69323	4.26938	3.86104	3.74326	3.21243	3.05923	3.47669	2.55437	3.66056	3.826	3.2559	3.35617	3.72525	3.23627	4.65372	3.89057	3.64383	3.60701	3.60117	3.76355	3.38591	4.3243	4.55332	5.02103	3.02997	3.37483	3.33416	3.87508	3.35093	3.10758	3.29215	3.61888	3.89685	3.48197	3.51943	2.71463	3.28902	2.98459	3.70482	3.69798	3.67719	2.98725	3.79262	2.45556	3.6639	3.52944	3.62416	3.42129
ENSG00000151632	1.08776	4.57128	3.95831	2.11869	2.39572	0.365661	0.74814	7.37929	2.1136	1.5287	7.03388	5.50927	0.411215	5.06187	1.80042	6.24292	6.23268	1.43039	5.43117	1.66639	3.85055	3.00733	5.35732	0.524302	0.724224	4.13437	7.31371	2.18497	5.14206	2.31567	2.52887	4.51761	3.64651	3.48779	3.88843	4.65509	2.87776	1.94214	3.37678	4.46322	4.20927	2.67327	1.32768	3.65439	2.67534	0.559152	3.2929	1.23	2.81011
ENSG00000078295	0.431474	0.0695648	0.132578	0.0448945	0.0680581	0.012184	0.177839	0.0251039	0.0317798	0.0732754	0.0352632	0.0282524	0.142141	0.00943822	0.146825	0.0620053	0.0173094	0.199347	0.0141442	0.942721	0.0636515	0.0127143	0.173929	0.468347	0.0707325	0.311336	0.202842	0.036001	0.0142431	0.00789766	0.0812635	0.035023	0.447052	0.00358659	0.64744	0.0736043	0.0127877	0.910347	0.100562	0.815214	0.0998334	0.156245	0.468674	0.0949234	0.463776	0.201358	0.121404	0.138216	0.360486
ENSG00000147509	2.70536	3.10063	4.02307	1.54117	1.81068	1.90799	0.138698	0.81374	3.09721	1.73187	1.08693	2.90177	0.270376	2.92177	2.37479	3.79339	1.72905	0.987387	2.862	1.72435	1.56926	2.5451	0.297064	0.455487	0.843554	1.35047	2.71022	3.46239	2.89383	2.78739	3.21082	1.99469	1.72689	1.95816	0.805315	1.81141	2.62768	1.48103	1.88255	1.33564	0.550351	2.86657	2.40263	1.19752	1.27871	2.57149	0.928466	2.54388	1.87141
ENSG00000084623	7.01373	8.63399	7.94567	7.81606	6.72892	7.38163	6.60929	6.84903	6.97671	6.45897	7.15107	7.09293	6.68594	7.30723	7.09846	8.32653	7.31767	6.98818	7.31452	6.93332	8.06691	7.06904	7.0653	6.73566	7.04047	6.81059	7.08112	7.24921	7.49263	7.47436	6.63576	7.29069	7.4183	7.61733	6.70095	7.59191	7.08917	7.09185	6.74915	7.17504	6.52549	7.35163	7.19037	7.2853	6.8748	7.26575	7.0743	6.97378	6.86197
ENSG00000135912	1.69418	1.63065	1.32951	1.36968	1.58003	1.47154	3.96495	2.19367	1.20195	2.10541	2.2626	1.61781	2.62031	1.97116	2.12345	0.733634	1.63388	2.52779	0.975853	1.66441	1.67882	1.15705	1.7243	2.68276	3.36332	2.02443	1.7457	1.8759	1.89854	1.48097	1.5957	2.70179	2.36726	1.86899	1.66709	2.15274	2.13323	2.00384	2.31516	1.73959	1.96315	1.54461	2.24107	2.85644	2.04934	1.55923	2.03754	1.96147	1.88494
ENSG00000164104	4.98857	5.45726	4.75486	4.91848	5.68741	4.71627	6.5708	4.76955	3.49016	4.67355	4.78296	4.96206	6.96311	4.6887	5.07546	3.85032	5.8856	7.44587	4.34211	4.9738	5.90114	5.4	5.82933	6.33931	6.55059	4.86131	5.48374	5.42336	3.96657	5.33386	4.21997	4.4305	4.03654	5.80909	4.49448	4.37769	5.19646	3.36555	4.28673	5.11193	6.15562	4.47917	4.81383	4.48944	4.52873	6.85649	6.40282	4.39811	5.6929
ENSG00000188991	0.0121169	0	0	0.010485	0	0	0.0113114	0	0.0649946	0	0	0	0.0129314	0	0	0	0	0.00881892	0.0141442	0	0	0	0	0	0	0	0.0272519	0	0	0	0	0	0	0	0.0173428	0	0.0076862	0	0	0	0	0	0	0.00645471	0	0	0	0	0
ENSG00000177889	3.65861	5.85762	4.89669	4.62413	4.11979	4.34474	3.49051	4.05244	3.58428	3.41067	4.19421	3.29574	4.38998	3.54996	3.5589	3.0698	4.46867	3.77843	2.80249	3.87278	3.99198	4.25318	3.78626	4.03062	3.86294	3.50133	4.58292	3.90471	4.06323	4.53234	3.81943	3.8365	4.35461	4.76702	3.28228	3.79832	4.13429	3.51928	3.72642	3.42432	3.80244	4.04564	3.55625	4.09971	3.533	3.79657	3.8222	3.65032	3.69557
ENSG00000222011	1.27399	0.672632	1.11662	0.531389	0.878267	1.3583	1.18997	1.10402	0.464718	1.19557	1.05834	0.987332	1.23273	1.00887	1.01305	1.20294	1.6908	0.993985	0.601294	1.3161	2.19136	1.38154	1.35351	1.16055	1.33856	1.34929	1.54593	0.949044	1.10279	0.912206	0.784802	1.32375	1.18746	1.07844	0.886313	1.09184	0.615521	0.825376	1.49322	1.06652	1.16791	0.880918	1.25575	1.43307	1.206	0.926728	0.935596	1.13935	0.947373
ENSG00000154678	0.0580059	0.044524	0.114943	0.0673929	0.0110117	0.0365569	0.0680188	0.0317815	0.0632683	0.148012	0.0155955	0.0573289	0.0917935	0.0214679	0.0595252	0.00182603	0.00601385	0.63933	0.026804	0.0142361	0.0267154	0.0547645	1.13792	0.0513419	0.0588592	0.121574	0.0401636	0.0386197	0.0534856	0.0445268	0.0227	0.0935376	0.0627588	0.103297	0.0824665	0.0647308	0.17478	0.248315	0.095863	0.0984232	0.0634322	0.0607986	0.111835	0.0978495	0.184172	0.0559352	0.0296319	0.0718082	0.161221
ENSG00000269095	0	0	0	0	0	0	0	0	0	0	0	0	0	0	0	0	0	0	0	0	0	0	0	0	0	0	0	0	0	0	0	0	0	0	0	0	0	0	0	0	0	0	0	0	0	0	0	0	0
ENSG00000165029	1.73862	2.37804	1.2757	1.93342	3.22819	2.55855	1.66956	2.40448	3.26308	3.21071	1.04591	2.00105	1.45916	1.48814	2.80378	1.54143	2.14953	1.81566	0.722065	1.97169	2.09959	2.29314	2.64481	1.49595	2.54072	3.2077	2.15298	2.50533	1.30999	1.81349	2.40536	3.533	2.87686	1.93692	2.85846	2.17459	2.2753	2.25511	3.46715	2.66614	2.95299	1.93103	3.05887	1.88118	3.14874	3.84571	3.69115	3.16009	3.67167
ENSG00000223569	0	0	0	0	0	0	0	0	0	0	0	0	0	0	0	0	0	0	0	0	0	0	0	0	0	0	0	0	0	0	0	0	0	0	0	0	0	0	0	0	0	0	0	0	0	0	0	0	0
ENSG00000196290	3.46077	5.1501	4.17057	3.0815	4.24628	2.95306	4.03395	3.25689	2.3249	3.1708	3.69094	3.36375	3.56381	3.26738	3.73965	3.13241	3.47778	4.35582	2.33562	3.77172	3.8492	2.65951	3.0523	3.84067	4.51725	3.50259	4.55669	3.00582	3.32923	3.3981	3.10416	3.44074	3.92502	2.68774	3.16212	2.93089	3.18246	3.27929	3.42744	3.06074	3.95845	2.8416	3.457	3.34928	3.39339	3.53835	3.75997	3.56363	4.16587
ENSG00000148677	4.82749	2.42893	2.81219	0.119273	0.988835	0.0411133	0	0.0421255	1.26428	0.670158	0.150092	0.0193194	0.10184	0.0815663	3.17361	1.51474	0.0414852	0.148838	0.232196	4.72967	1.25512	0.221082	2.76628	0.171855	0.295373	1.9231	0	0.855654	0.10693	0.499263	3.06354	0.0458093	6.17434	0.207157	2.15008	0.139085	0.151158	4.09365	0.417784	4.83668	0.0897826	2.45998	2.95361	0.0377226	0.272983	2.9046	1.68005	3.19907	4.90671
ENSG00000153898	0.916964	1.1883	0.563956	0.538222	1.12932	0.643186	0.87095	0.338058	0.61192	0.737196	0.171305	0.520109	0.702192	1.02151	0.835272	0.303266	0.706451	1.40633	0.202386	1.51511	0.19586	1.09599	0.782243	1.15498	0.650354	1.01828	0.734608	1.13316	0.211607	0.355798	0.392438	1.20357	0.474929	0.0887035	0.861141	0.532184	0.689223	0.484339	1.07594	0.476001	0.902745	0.307015	0.216392	0.396226	1.15633	0.46951	0.489002	0.342521	1.42522
ENSG00000146085	2.96581	3.53566	4.16225	2.85346	2.95542	2.25833	3.8204	4.46389	2.567	2.78229	3.45348	3.21909	3.02862	2.98452	3.26476	2.78109	4.24496	3.86087	2.40226	3.11114	3.41463	3.05583	3.24855	3.07254	3.81435	3.17039	3.79909	2.87262	3.26274	2.83667	2.96995	3.51542	3.09195	3.00387	3.21393	2.7429	2.4213	3.16313	3.11257	3.13889	3.58912	3.11883	3.99516	4.03135	3.3063	3.46164	3.02483	3.11788	3.07383
ENSG00000009844	2.72426	4.20517	3.62575	4.81994	3.39896	2.78602	3.10762	2.83687	2.6462	3.03399	3.02194	2.91235	3.13732	2.83415	3.36756	3.06707	3.89022	3.66487	2.30039	3.28459	3.79228	3.10767	3.25515	2.61747	3.44417	2.8016	3.66558	3.47514	3.22224	2.94075	3.54111	3.26313	3.32823	3.71489	2.49792	2.91037	3.03198	3.27191	2.98775	2.73107	3.20541	3.20901	3.23733	2.82388	3.00568	3.65979	3.36106	3.03076	3.55592
ENSG00000159263	0.985076	0.431675	0.245127	0.170416	1.32361	0.125928	5.30164	1.34171	0.0886426	1.00872	1.32231	0.827026	0.3985	0.598822	1.12155	0.730155	3.22335	1.74282	0.119767	1.55893	1.62309	0.136435	0.360219	3.92035	3.86039	0.716135	0.59445	0.0597996	0.762474	0.287081	0.108519	1.27408	0.107055	0.103215	0.401704	0.533212	0.0463498	0.235107	0.144672	0.38436	1.25106	0.0687616	0.412164	1.0619	0.0916441	0.621314	0.883089	0.303325	0.112522
ENSG00000121766	4.25804	6.36303	5.01483	4.98334	4.46034	4.25193	4.16281	4.51687	3.69465	3.93649	4.67448	3.80944	3.82153	4.52303	4.45903	4.69761	4.60297	4.57131	5.04073	4.23729	4.85773	4.25906	4.15837	4.58381	4.72811	4.40168	4.45037	4.95122	5.04278	4.11998	3.89417	4.19438	4.77164	4.99574	3.78451	3.99024	3.60601	4.47375	3.64586	3.86405	4.21517	4.39674	3.77871	3.93748	3.92427	4.3014	4.32876	4.16957	4.25159
ENSG00000125746	3.30132	1.14835	2.66489	3.37316	3.34816	2.92654	3.77977	2.18836	2.74373	2.96838	3.14569	2.90243	2.00464	2.66858	2.1733	2.39597	2.74975	2.38199	2.2427	2.65653	2.76034	3.68775	3.42659	2.47462	1.90228	2.744	2.49464	2.74134	2.57184	3.7688	2.10758	3.15495	2.50471	3.7716	2.70515	3.17776	3.11516	2.85729	3.21152	2.78477	2.86089	2.70512	3.37754	2.98202	2.49734	2.25833	2.67891	2.8057	2.6157
ENSG00000005421	0.0371931	0.0694859	0.10244	0.0215607	0.0107491	0	0.176307	0	0	0	0.0169058	0	0.182372	0	0	0	0.0482034	0.00910141	0.0145964	0	0.00820125	0	0.00975095	0.0169056	0.0888302	0.0146642	0	0.0172619	0	0	0	0	0.00637449	0	0.0178966	0.0169058	0	0.00955089	0.016035	0.0149855	0.0701905	0	0	0	0	0	0	0	0
ENSG00000178623	0.704666	0.206356	0.316966	0.132721	0.692374	0.246844	0.650448	0.2958	0.350798	0.371197	0.169451	0.394573	0.243166	0.160432	0.215615	0.593659	0.130323	0.33009	0.599278	0.394191	0.228129	0.258932	0.307734	0.54189	0.562779	0.601565	0.061861	0.189878	0.597297	0.0924927	0.175316	0.512545	0.164465	0.0782792	0.502614	0.313479	0.127036	0.323484	0.564543	0.267078	0.239199	0.340756	0.157957	0.194378	0.568037	0.215428	0.394428	0.275679	0.802619
ENSG00000116690	0.153694	0.019847	0.0469147	0	0.0180597	0.104143	0.089308	0.0166747	0.026719	0.0346412	0.033036	0.0815888	0.307314	0.0261019	0.0951855	0.0297314	0.0802883	0.113333	0.00821344	0.72433	0.0183539	0.0389391	0.323435	0.0924499	0.0604462	1.26967	0.0700149	0.0479446	0.0307748	0.0205052	0.0776615	0.13916	0.0734251	0.0369802	0.602754	0.105822	0.0221591	1.05762	0.699892	0.892121	0.178314	0.139449	2.02611	0.0149182	2.16994	0.126521	0.0919901	0.157863	1.38116
ENSG00000081853	0.121671	0.05009	0.0655592	0.00912019	0.203126	0.149133	0.0389613	0.103162	0.108524	0.213005	0.411576	0.0995245	0.17775	0.132075	0.0665737	0.0480165	0.137728	0.0454225	0.0245062	0.094836	0.0938714	0.0293082	0.148661	0.0458186	0.0788431	0.229114	0.0354391	0.311281	0.0459284	0.065616	0.0504125	0.29059	0.047638	0.146816	0.37229	0.0699012	0.0396524	0.195941	0.222941	0.315066	0.0359019	0.214731	0.12111	0.348119	0.313321	0.0789594	0.0940321	0.103851	0.223631
ENSG00000104804	0.0621538	0.0267505	0.0133602	0.0136668	0.0135766	0.0435504	0.0722521	0.297545	0.100517	0.0284267	0.417166	0.0589213	0.167825	0.058124	0.114628	0.0552961	0.0842526	0.263068	0.0545968	0.0291282	0.496543	0.0545052	0.196304	0.409089	0.111421	0.207887	0.0528683	0.043255	0.302219	0	0.0127768	0.164963	0.0476659	0.291742	0.0667346	0.103681	0.0494264	0.0593383	0.0984899	0.0651623	0.0709733	0.00888305	0.0503595	0.233324	0.142764	0.0531479	0.0288757	0.0765568	0.0638354
ENSG00000140854	3.16406	2.18362	2.53671	3.56662	2.78086	4.24079	2.77788	2.91688	2.98676	2.70264	3.71976	3.62976	3.88061	2.81509	3.21458	2.62441	3.8346	2.61488	2.67684	2.84191	3.53112	3.09689	2.91109	2.77905	1.98467	3.0549	2.27216	2.525	3.05322	2.98357	2.30478	3.50288	3.27394	3.68345	3.2486	3.35584	2.53832	3.50041	3.05631	3.13165	3.66731	3.53021	3.53695	2.39807	3.12725	2.63544	3.22976	2.53925	3.03589
ENSG00000170959	0.0134503	0.00916234	0.0204167	0.0162692	0	0.0124889	0.0713521	0.0364967	0.00736429	0.0206199	0.0127517	0.0102006	0.0200559	0.0100603	0	0	0.0146928	0.258353	0.0031536	0	0.125366	0.00377704	0.0271149	0.0835313	0.0484687	0.0251537	0.0917337	0	0.00713562	0.0467275	0.00218278	0.0464884	0	0.0142861	0.0287758	0.00365486	0	0.0184409	0.135682	0.0129087	0.0486993	0.00303016	0.00348506	0.00287091	0.00588258	0.00230195	0.00989505	0.00148622	0.00830822
ENSG00000272921	0	0.0244373	0.036295	0.108616	0	0.0200395	0	0.0256254	0	0.0195212	0	0	0.11161	0	0.0459328	0.0305466	0	0	0	0	0.0281971	0	0.0334816	0	0.0313768	0	0	0	0.0378596	0	0	0	0.0435713	0	0	0	0	0	0.0276457	0	0	0	0	0.0229334	0	0	0.0263805	0	0.0440048
ENSG00000163221	3.62376	2.50257	3.22778	6.13487	2.89919	5.61463	1.85622	3.72216	6.43285	4.88496	4.30398	5.86667	1.58825	5.56411	2.96245	3.67734	3.688	4.07141	8.29103	6.05018	5.93289	6.72784	0.374751	0.599825	0.846856	4.25526	6.04424	7.39192	7.54472	5.87887	8.29677	3.99222	6.59113	2.09987	2.10761	6.74678	4.79532	5.90625	3.29264	4.37314	6.71028	6.07917	5.10285	4.41574	5.12837	1.87874	3.83677	3.1551	4.21209
ENSG00000006377	0.57841	0.591149	0.051378	0.237893	0.338053	0.0142868	0.485685	1.32947	0.0168044	1.17431	0.559978	1.11124	1.55678	0.271337	0.0649316	0.460025	1.15183	1.71652	0.0238931	0.426959	1.12408	0.021485	1.46158	0.0138958	1.9613	0.619999	2.29837	0.242262	0	0.0688043	0.598538	0.511739	0.800543	0.036066	1.14366	0.592753	0.0450101	0.643166	0.376578	0.19629	1.18727	0.388318	0.102761	0.436611	0.419841	0.500112	0.0798346	0.0113031	0.295973
ENSG00000198105	1.13129	1.307	0.823018	0.993921	0.492407	0.823061	1.43705	1.41317	0.321315	0.67606	1.44343	0.660059	1.39516	0.669604	0.610153	0.699894	1.10862	2.15691	0.383185	0.913608	1.17086	0.7086	1.30621	1.22904	1.49241	1.13146	1.03127	0.631813	1.21531	0.651895	0.720618	0.797405	0.535109	0.783819	1.06265	0.63824	0.432077	1.22771	0.988097	0.676603	1.27722	0.365695	0.614048	1.51204	0.924107	0.638243	0.584096	0.920847	0.89415
ENSG00000095794	2.2415	3.47563	2.5952	1.56577	2.11554	2.61578	2.40588	1.93327	2.05329	0.900123	2.2853	1.54566	2.49182	1.24701	1.19589	1.67909	2.22568	2.46773	1.20396	1.77778	2.12802	2.24704	2.61411	2.49018	2.36722	2.33664	1.78045	1.60676	1.90902	2.08808	1.15299	1.68752	1.29675	1.86197	2.19991	1.96434	1.54628	1.46945	1.32329	2.91212	1.76371	1.31082	1.93372	1.77571	2.09555	1.75003	1.57976	1.4777	2.52357
ENSG00000080910	0	0	0	0	0	0	0	0	0	0	0	0	0	0	0	0	0	0	0	0	0	0	0	0	0	0	0	0	0	0	0	0	0	0	0	0	0	0	0	0	0	0	0	0	0	0	0	0	0
ENSG00000023041	2.99975	3.85802	4.10923	3.0289	3.08242	3.00218	3.19024	2.68454	2.33428	2.95626	2.96759	3.22438	3.26276	3.63732	3.65378	2.52349	3.48441	3.57611	2.37505	3.42482	2.39512	3.36086	3.09387	3.36369	3.45254	3.72126	3.32583	3.19078	3.18974	3.27432	2.87627	2.98325	3.16459	3.22963	2.94243	2.77454	2.72955	3.07344	3.04589	2.82672	3.39653	2.74083	2.99649	3.47243	2.86938	3.01663	3.04008	3.33343	3.09828
ENSG00000249141	0.364705	0.158917	0.0492593	0.0503755	0.678142	0.802154	0.343037	0	0.182304	0.0782246	0.531152	0.289632	0.233214	0.427963	0.287499	1.19135	0.365877	0.162833	0.253368	0.296813	1.38653	0.264526	0.0895247	0.322339	0.310113	0.311624	0.0655022	0.0404114	0.521058	0.566915	0.179944	0.110775	0.0877396	0.241099	0.305288	0.354087	0.176475	0.210082	0.144708	0.624907	0.190539	0.0650429	0.145475	0.0616932	0.343518	0.144142	0.435331	0.183506	0.250976
ENSG00000184271	1.21569	0.281953	0.288677	0.339797	0.716958	0.470674	1.84431	0.438787	0.427081	0.380373	0.390085	0.493297	1.05784	0.363758	0.249734	0.331984	0.417489	0.93422	0.472402	1.15161	0.167802	0.538684	1.07291	0.939258	0.853211	1.17874	0.744844	0.527675	0.349981	0.409013	0.153831	1.07232	0.504519	0.407369	1.36206	0.651725	0.332658	0.94701	0.840905	0.943573	1.01774	0.588046	0.801339	0.585619	1.11761	0.775689	0.351379	0.606581	0.728059
ENSG00000173546	5.20892	3.24725	3.44088	3.86662	3.90396	3.59058	4.12489	3.61679	5.55142	4.23505	1.09731	1.24646	2.7726	5.57162	7.0767	3.13264	2.30704	3.18907	1.46349	3.79369	4.1033	4.89085	2.44393	3.05421	2.82531	2.27368	1.9502	3.19733	3.81843	3.80232	5.27151	5.24018	5.05129	2.43146	3.59968	4.80802	4.39446	6.05338	3.54894	4.17904	3.65106	5.01306	5.52403	3.9852	3.78379	5.43014	2.8582	4.62578	3.97659
ENSG00000178372	5.68762	6.61476	0.498185	5.98919	7.7063	1.27016	7.53333	8.05107	5.57058	2.59917	8.47215	4.63895	7.89108	5.93156	4.46613	4.11797	7.59426	6.87864	8.25522	8.88509	7.69853	5.00743	0.640584	8.4988	8.88127	5.36277	5.87414	3.44114	11.2785	5.5778	7.00133	3.00764	6.19623	6.90744	7.08942	3.38179	4.63404	7.70924	3.03952	5.50973	9.59324	5.59355	5.123	8.77896	5.1028	2.097	3.85408	1.88142	6.43883
ENSG00000147439	1.89039	1.66995	2.42762	1.58944	1.90919	1.63654	2.51543	1.75274	1.2386	1.24815	2.29941	1.47674	2.38507	1.38481	1.43621	0.371114	2.33475	2.02903	1.24043	1.68519	1.71611	2.32078	1.43509	2.27213	1.54517	2.37807	2.02948	1.41328	1.62686	1.53036	1.2833	2.04329	1.54655	1.98107	1.75707	1.65934	1.65763	1.92462	2.02073	1.26255	1.92404	1.72579	2.57926	1.84476	1.46087	1.70402	2.19827	1.65051	1.2607
ENSG00000176383	0.999087	1.5946	1.35596	1.52709	0.945416	1.99495	0.109014	1.04891	0.308445	1.24114	1.14171	0.495263	0.792683	0.879237	0.629761	0.914221	0.909272	0.190795	1.75018	0.663994	1.2678	1.01873	0.156606	0.296026	0.440037	0.318182	1.39733	1.40198	1.45614	1.46744	0.863924	1.03198	0.918708	1.09776	0.129897	0.71107	0.977331	1.02203	0.507723	0.999507	0.402851	0.39252	0.872901	0.994295	0.205221	0.871006	0.62059	0.855824	0.638208
ENSG00000123560	0.112529	0.0585015	0.0629149	0.00505189	0.00501843	0.251117	0.14534	0.0679651	0.0158979	0.0183978	0.027469	0.334769	0.0966394	0.0536368	0.0372038	0.0247165	0.013639	0.551788	0.521958	0.595623	0.0637193	0.0122311	0.0360169	0.0274686	0.153734	0.777392	0.0197103	0.00806874	0.0102887	0.0282848	0.00942852	0.0593804	0.011858	0.025675	0.0494859	0.199484	0.022068	0.475035	0.129267	0.836492	0.0298511	0.311827	0.133404	0.0216151	0.31244	0.034501	0.0213397	0.0475033	0.329238
ENSG00000234068	0	0	0	0	0	0.0247587	0.0493624	0	0	0.0711807	0	0	0.0563267	0	0	0	0	0	0	0	0.0348142	0	0	0	0	0	0	0	0	0	0	0.0344238	0	0	0.0380703	0.0359765	0	0	0	5.62587	0	0	0	2.2888	0	0	0	0	0
ENSG00000260691	0.0271926	0	0	0	0.00783952	0.00424041	0	0.0428836	0	0.00413013	0.0061816	0.00494268	0.0145781	0	0	0	0.0142151	0.0902467	0	0	0	0	0.00711088	0.00618152	0.00666002	0	0	0.00631228	0	0	0	0.035115	0.0138967	0.0161124	0	0.0061816	0	0	0.00586207	0	0.0208108	0	0	0.0096969	0	0	0.016711	0.0100338	0
ENSG00000125744	3.35442	1.77988	2.76531	1.92039	2.2729	1.17501	1.1193	1.57454	1.92425	2.64187	1.77946	1.34293	1.44093	1.99502	1.37043	2.97555	1.92798	1.4117	1.46981	2.84395	2.06216	1.83067	1.63765	2.73545	2.43273	2.39074	2.24612	2.37719	2.752	1.78468	1.59968	1.55206	2.11463	2.22875	1.99883	1.84095	1.26789	2.79916	1.60086	2.45038	1.45866	1.71063	2.42341	1.88907	2.05872	1.60306	1.53243	2.14757	1.94118
ENSG00000157315	0.375205	0.956676	0.468858	0.907966	0.327884	0.378542	0.31567	0.402795	0.144055	0.240798	0.221079	0.422607	0.427668	0.353183	0.517381	0.152704	0.653361	0.297057	0.140187	0.13374	0.673548	0.562445	0.268043	0.320085	0.0717435	0.269092	0.396188	0.45887	0.57848	0.459702	0.537942	0.226119	0.320612	0.371744	0.433752	0.475452	0.413577	0.677991	0.278708	0.184239	0.378725	0.404428	0.480012	0.673109	0.517913	0.591084	0.458841	0.418413	0.302662
ENSG00000015532	3.93076	2.32388	2.47674	3.00801	3.29584	3.52888	3.54438	3.31164	2.63198	4.31474	3.09373	3.33389	3.2866	3.33212	3.44936	2.98011	2.69662	3.32201	2.47309	2.75897	3.36082	2.57114	3.47722	3.79596	2.93034	3.349	3.64447	3.22124	1.67542	2.79903	3.4167	3.97524	3.42063	2.91414	3.09896	2.79276	2.79455	3.1665	3.01592	2.52219	2.83872	2.69854	3.01518	2.7945	2.68055	3.59999	3.47955	4.21642	3.0175
ENSG00000090382	4.79511	4.85459	5.50304	3.72328	6.34686	5.90012	5.58869	6.56564	7.25195	2.26583	5.79097	4.83346	3.38253	5.19494	5.22819	3.14716	5.34617	4.6302	3.68944	7.14097	4.51738	5.72077	5.40619	6.33001	6.48117	10.8695	1.63286	4.57131	3.13224	3.78495	3.91945	7.30701	4.22293	3.48649	8.72899	4.78298	6.58397	6.63785	10.5456	8.06843	4.52625	5.82308	5.14824	5.52559	8.27429	6.67208	6.042	5.29253	7.57415
ENSG00000165732	3.66428	4.83089	5.47958	4.95744	4.73385	4.94339	4.48418	5.44479	5.09802	5.38016	4.41017	5.09291	5.26472	4.72735	5.86453	3.68628	5.18125	4.96729	2.74711	4.71048	5.06562	5.54057	5.12457	5.07763	5.23833	5.09897	4.75184	5.57392	6.1508	5.11684	5.07464	5.46985	5.5692	5.18989	5.11255	5.93144	5.41021	5.25583	5.74598	5.59253	5.06653	5.48197	5.94689	6.32775	5.38488	5.25813	5.19223	4.95295	5.59164
ENSG00000103043	3.14216	2.18132	3.20307	4.74932	3.04304	3.19288	2.72043	3.21975	2.77768	3.32542	2.95908	3.00527	3.46062	3.43634	3.32392	2.96504	3.35658	2.42031	3.09197	3.07179	3.42602	2.78714	3.11252	2.59931	3.18061	3.16185	2.2504	3.01664	3.03211	3.19217	3.05145	3.33676	3.30558	3.26352	3.38076	2.5921	2.61365	3.49399	3.20431	2.86489	3.23273	3.10424	3.03215	2.34834	3.30377	2.98586	2.93962	3.06275	3.29091
ENSG00000124486	2.71647	2.75186	2.15895	3.33537	4.49899	3.32847	4.09034	3.86008	3.96482	3.42745	2.7671	2.86243	3.09722	2.36605	4.05348	2.24255	3.5102	3.46427	2.11267	3.03655	3.74609	2.86634	2.94082	4.24634	3.54232	3.36836	2.38729	3.4015	3.16983	2.87547	4.13346	3.79797	3.1469	3.06891	3.3445	3.54744	3.4364	3.92448	3.61272	4.32874	3.66055	4.22934	4.0509	4.0208	3.92616	4.21533	3.71296	4.00759	4.05112
ENSG00000136874	1.50649	1.29478	1.6513	2.43871	2.72996	2.08795	2.36597	2.72939	2.38715	1.61438	1.59175	1.68979	1.4647	1.55719	2.23481	0.810118	2.30042	3.56611	1.41068	1.82559	2.79285	2.04855	2.29336	2.07548	2.32172	1.81094	1.65624	1.55137	1.94813	1.63325	1.98377	2.36326	2.26996	2.52643	2.16918	2.02646	2.63261	2.13782	2.73682	2.21995	3.0971	2.4058	2.47928	2.40143	2.36402	2.41694	2.12531	1.96937	2.95531
ENSG00000164105	2.78306	2.82519	2.30194	2.22234	3.15804	2.60803	3.37052	2.57094	1.82409	3.02389	3.12945	1.81408	4.17207	2.10312	2.70777	3.17782	2.83547	3.88305	3.14988	2.6622	3.43582	2.76597	3.55131	3.83684	3.74405	2.51964	2.41936	3.27457	2.11934	2.49811	1.91168	2.41059	1.68847	3.21994	2.59327	1.68382	2.06827	1.56879	2.02903	2.5177	2.85943	1.43744	2.45864	2.162	2.28787	4.18412	3.08972	1.29212	2.78096
ENSG00000143319	3.27313	3.49398	3.50547	3.77508	3.42443	3.3039	3.411	4.27139	2.72989	3.4978	3.60881	3.51051	3.93562	3.9145	3.56038	3.6538	3.82138	3.43375	2.59074	3.22129	3.54032	3.91639	3.72703	3.26526	3.81072	3.8529	3.97635	3.94132	3.51094	3.50644	3.17621	3.52224	4.14487	4.29705	3.44344	3.38662	3.46449	3.56283	3.54857	3.29114	3.59378	3.71289	3.45607	4.07846	3.64336	3.45945	3.60092	3.75234	3.55975
ENSG00000166140	3.29742	3.2359	2.81461	3.40001	2.93249	3.24307	2.16375	2.2632	1.95938	2.66072	3.36855	2.87175	2.83986	2.5989	2.69642	3.35321	2.50671	2.98399	3.30308	2.88849	2.01452	2.80711	2.26357	2.81954	3.20995	2.83569	2.68727	2.93372	2.91285	2.46793	2.51808	2.99648	2.17348	2.74809	2.25584	2.49519	2.14112	2.7132	2.51744	2.7781	2.93552	1.78137	2.31597	2.23764	2.28959	2.30835	2.44389	2.37711	2.54271
ENSG00000165730	0.058603	0.926592	0.0739129	0.403462	0.595012	0.238269	0.524554	0.647985	0.037629	0.0660522	1.29836	0.182176	1.35616	0.207715	0.439357	0.122086	0.54444	3.11775	0.0115975	0.253461	0.0322765	0.441216	2.7718	2.36304	0.118615	0.144589	0.900735	0.0273068	0.101854	0.199624	0.0239705	0.327679	0.203058	0.102201	0.7558	0.281172	0.0435314	0.0813288	0.979212	0.457264	0.748998	0.0331796	0.111412	0.243272	0.0707094	0.220223	0.172387	0.18505	0.20052
ENSG00000175745	1.29248	0.655766	0.218725	0.383506	0.881214	0.679786	2.0259	2.11052	0.380051	0.226221	2.64988	0.387374	2.04257	0.59422	1.33594	0.922842	1.29134	2.06734	0.0956549	2.5132	0.841311	0.274298	2.53613	0.723833	1.15065	1.78734	1.59299	0.88909	0.562008	0.40144	0.718148	0.784004	0.336508	1.3017	1.67065	0.376263	0.539482	1.60917	0.772508	0.798313	1.24972	0.744256	0.617428	1.29508	1.60173	0.70955	0.431402	0.911846	1.06041
ENSG00000186017	0.880222	1.19766	0.65589	0.613196	0.507473	0.601471	1.39087	0.729624	0.229587	0.392796	0.479254	0.320833	0.698951	0.356852	0.555382	0.504505	1.12158	1.26094	0.12283	0.632113	0.809261	0.0893305	0.799795	0.954123	0.804465	0.708334	0.7736	0.594735	0.0937229	0.29458	0.488271	0.497018	0.595352	0.80543	0.757004	0.712532	0.164094	0.696987	0.571378	0.553516	0.826499	0.362942	0.657227	0.756706	0.645388	0.621296	0.442214	0.320836	0.482098
ENSG00000221852	0.143691	0.177084	0.831123	0.0513426	0.0758512	0.0949748	0.0279294	0	0.228552	0.0536274	0.098828	0.0639648	0.078473	0	0.0320771	0.0212979	0.0913968	0.146122	0	0.0549391	0.0770622	0.496051	0	0.0203144	0	0.102651	0.0667531	0.31751	0.529579	0.113425	0.266821	0.0575319	0	0.0525403	0.124462	0.635099	0.0190132	0.0453919	0.0755799	0.186724	0.0172033	0.0499972	0.0384953	0.015977	0.146127	0.123365	0	0.0165309	0.0756181
ENSG00000123562	6.18474	7.55322	7.02236	6.74439	5.99968	6.33415	5.76556	5.96051	6.16737	6.31916	5.84393	6.26013	7.31617	6.23275	6.57453	5.9622	6.50376	7.09998	4.95241	6.17467	6.64337	6.53103	6.56575	5.36988	6.52972	6.16814	6.11205	7.16336	6.45945	6.45226	7.22128	6.2671	6.59012	5.99759	5.98343	6.22064	6.08804	6.84575	6.08399	6.11086	6.27479	6.31884	6.2588	6.25858	5.926	6.34949	6.0075	6.68559	6.41625
ENSG00000073756	2.38802	6.19048	5.47007	2.16217	1.69013	0.679426	3.33192	3.76351	5.33925	4.86751	4.44536	2.58318	6.34139	1.04998	1.98116	3.45546	5.40982	4.25262	0.688979	1.32194	6.95227	4.11977	3.24132	5.61124	5.00725	2.68497	4.2591	0.857533	3.82753	2.0053	3.38133	2.44308	8.22511	5.14482	0.950507	2.87425	1.6533	2.54797	2.20206	2.29206	0.702246	1.58408	5.92478	2.20849	3.62021	1.0544	0.35377	0.382687	3.09129
ENSG00000074755	1.76768	0.722026	0.83901	1.53072	1.7035	1.81229	2.91363	2.57568	1.70032	1.89677	1.78452	1.94287	2.06889	1.51908	2.54388	1.08935	1.9236	1.5064	1.21323	1.64579	1.78681	1.81305	2.5175	2.55595	2.06256	2.27752	1.42682	1.89493	1.86327	1.70153	2.19467	2.65046	1.83755	1.98238	2.3905	2.41636	2.42999	2.79839	2.79773	2.10528	2.65814	1.99432	2.79775	2.55729	2.77837	2.19496	1.82114	2.30397	2.52898
ENSG00000164299	0.0361166	0	0	0.44545	0	0.00846188	0	0	0	0	0.0366705	0	0	0	0	0.471954	0	0	0	0	0.0814826	0	0.741113	0.0486891	0.0132792	0	0	0.0125874	0	0	0	0.0350883	0	0	0	0	0	0.0138856	0	0.0109251	0	0	0	0	0.0393419	0	0	0	0.0186707
ENSG00000137500	2.87999	3.26531	3.17267	1.84657	1.94499	2.70048	1.96091	2.45117	1.52838	1.82481	2.30985	2.27278	2.4758	1.51765	1.88529	1.91227	2.3523	2.52913	0.695003	2.64552	2.69929	1.95953	1.98851	2.64046	2.86452	2.149	3.03935	2.13853	1.79069	2.59985	2.74754	1.92514	2.06766	1.94151	1.77931	1.76831	1.9408	2.3857	2.4003	2.37863	1.52108	2.26929	2.12655	2.00811	2.11438	1.66813	2.00586	1.9652	1.94837
ENSG00000159082	0.728401	0.831238	0.522487	0.79009	1.41354	1.10041	2.59129	1.52429	1.18598	0.81741	0.787389	0.838735	0.826109	0.885407	1.30204	0.705934	1.86953	1.73057	0.338078	0.976772	1.57172	0.981619	1.34472	1.98987	1.43915	1.66568	0.75171	0.933793	0.830998	0.580215	1.03171	1.58575	1.5098	1.44515	1.20499	1.39266	1.18591	1.55319	1.39596	1.43305	1.58148	0.899754	1.40953	1.67987	1.84829	1.31285	1.36771	1.16269	1.58486
ENSG00000159202	4.94343	4.17501	4.69352	4.79364	5.14114	5.18818	6.02556	5.01225	4.26207	4.82175	4.94722	4.26806	4.58819	4.96261	5.20038	4.91969	5.1193	4.97781	4.48217	4.62391	4.90409	4.88288	4.58927	5.92176	5.3807	4.99452	5.28877	5.51956	4.70828	4.48102	4.97077	4.77124	4.91915	4.96788	4.83212	4.45077	4.85711	5.03452	4.86189	4.46793	4.74157	4.60873	5.09945	5.08198	4.53377	5.32039	4.7958	5.54046	5.17947
ENSG00000136861	2.58944	1.5991	1.28259	1.79777	3.06535	1.94535	3.72845	3.12591	1.83145	2.49424	2.3292	2.31214	2.33128	2.18852	2.6028	1.2555	2.99671	3.56394	0.951753	2.29479	2.8857	2.34617	3.05267	2.90638	3.0669	2.64777	3.06159	1.84144	2.65375	2.32724	2.13947	2.66618	2.47178	2.81187	2.56051	2.01969	2.10155	2.53179	2.73485	2.19314	3.62544	2.21451	3.04298	2.55295	2.77008	2.85428	2.92877	2.43984	2.79501
ENSG00000118113	0.0804747	0.286272	0.823616	0.0265939	0.111144	0.0143323	0	0.0719914	3.2047	0.133878	0.0139402	0.0166963	0.0647857	0.120422	0.0110621	0.0218696	0.0240254	0.058946	0.0358057	0.0928055	0.0466615	0.251756	0.13823	0.0414225	0.26158	1.29129	0.0232023	0.129869	0.0271248	0.0976172	0	0.0654719	0.051688	0.03618	1.39208	0.0750563	0.218472	0.614212	0.00662589	0.648608	0.0118012	0.0680366	0.0264682	0.037996	0.615182	0.01753	0.602268	0.130519	0.309752
ENSG00000131849	0.930014	0.717653	0.265478	0.440436	0.383907	0.645872	1.21709	0.886258	0.187126	0.514857	1.55423	0.2295	0.949821	0.157012	0.69077	0.232462	1.25062	1.30698	0.161489	0.78638	0.675912	0.331631	0.716513	1.13512	1.63114	0.634566	0.592265	0.628331	0.757093	0.406252	0.289764	0.799813	0.356137	1.23841	0.717084	0.685268	0.340333	0.729091	0.945011	0.653817	0.58278	0.410566	0.611922	1.32954	1.08867	0.869677	0.704611	0.780101	0.680646
ENSG00000120937	0	0.0287604	0.042685	0.12719	0	0	0	0	0.0277323	0.174351	0	0	0.0536976	0	0	0	0.0394606	0.0367845	0	0	0	0	0	0	0	0	0	0.0350036	0	0.0491841	0	0.0328054	0	0	0	0	0	0	0	0	0	0	0	0	0.107658	0	0	0.027925	0.219432
ENSG00000188352	2.24375	1.87874	2.13931	1.43611	2.27776	2.32008	2.28318	2.29062	2.14964	1.61235	1.43278	1.56392	2.09956	1.44264	2.43528	2.17679	2.67239	2.6131	1.4909	1.60809	1.85685	2.12096	2.07423	1.69827	2.74468	1.75756	2.36811	2.39954	2.58804	2.0742	2.15661	2.44921	1.78311	2.43697	2.23109	1.48942	2.65266	1.93671	2.30012	2.17001	2.21353	1.48418	1.58248	2.37236	2.06435	3.8976	2.17524	1.69878	2.32663
ENSG00000003147	1.9135	0.43142	0.25822	0.667653	1.12575	1.06197	1.42189	0.784355	0.357159	0.438749	0.744744	0.622954	2.00768	0.358872	0.2237	0.964945	0.805359	3.66096	0.212849	1.05903	0.961525	0.208113	0.323444	2.32274	1.96668	1.84912	0.199313	0.282212	0.2844	0.362225	0.139928	0.881254	0.200021	0.274706	1.18399	0.474074	0.229456	0.461427	1.50318	0.751179	1.44234	0.349792	0.39574	0.606503	1.05984	0.212849	0.381238	0.33738	0.671835
ENSG00000154025	0.0646882	0.298203	0.0771321	0.393939	0.0466041	0.209239	0.050558	0.175718	0.757977	0.140017	0.104379	0.200235	0.0491802	0.284154	0.151543	0.308923	0.131538	0.0473136	0.76627	0.277935	0.281231	0.157014	0.0506429	0.0620987	0.0318242	0.12393	0.113812	0.0597341	0.93128	0.186553	1.20961	0.123103	0.606856	0.233819	0.110305	0.188671	0.267018	0.49089	0.0691048	0.267807	0.155503	0.121584	0.247913	0.340463	0.180607	0.0371161	0.0530274	0.402396	0.0336009
ENSG00000021762	2.55592	1.19861	1.64864	2.37316	2.14256	2.3727	2.0248	2.12935	1.63058	2.43936	2.37059	2.07958	2.93311	2.21754	1.97498	0.73829	0.687857	1.95183	0.713959	2.1778	3.11138	2.07984	2.34626	2.25371	1.39025	1.84655	1.7336	1.66392	3.07832	1.77711	1.85846	2.54814	1.46397	1.20408	2.62092	1.68902	1.93642	2.46663	2.74234	2.47216	2.5676	2.52479	2.59889	1.88412	2.53875	2.49895	2.07129	1.91548	2.09865
ENSG00000150750	0.340238	1.6155	0.230138	0.122298	0.0498429	0.143323	2.37337	3.03596	0.250993	0.0904939	2.62768	0.0158833	0.360561	1.07596	0.0313397	0.231823	0.213756	0.236929	0.193321	1.14615	0.882907	0	0.152598	4.22508	3.7202	0.194165	0.0967809	0.040246	0.444669	0	0	0.509825	0.0873863	0.538881	0.899492	0.0198458	0.0369125	0.965126	0.366186	0.884872	0.588644	0.633288	0.425866	0.0156077	0.673519	0.355054	0.278533	0.395261	0.144208
ENSG00000156076	0	0.0169273	0	0.0635282	0.515317	0	0.0684377	0.0352892	0.0324571	0.379819	0.010133	0	0.0855964	0	0.317133	0.0523607	0.0116771	0.768824	0	0.470779	0	0.0208665	0.414173	0.0301876	0.194475	0.654665	2.7255	0.0308208	0	0	0.0710599	0.289762	0.0525154	0	0.728431	0.658068	0.00948174	0.0451277	0.197907	1.06962	0.17782	0.0250674	0.0570319	0.100245	0.0323924	0	0.0452658	0.0245809	0.0305447
ENSG00000160867	1.24067	0.451546	1.3155	1.06995	1.54863	1.13678	1.30859	1.84253	0.410489	2.66813	2.10344	1.05857	1.71644	1.6043	0.966069	2.48448	1.33019	1.77393	1.51934	0.47289	1.77282	0.845237	2.47556	0.276	0.510543	0.253051	1.79017	0.803008	1.08203	0.950098	0.874613	2.39705	0.221823	2.87164	0.303634	1.70507	0.255811	0.490687	0.763892	0.814998	1.40068	0.474703	1.37576	2.44229	0.712278	2.52628	0.371658	1.19312	1.29624
ENSG00000134987	2.31242	2.27508	2.72052	2.49486	1.84593	2.86861	3.09475	2.57511	2.02567	1.77178	2.34823	2.45959	2.88531	2.01334	3.074	1.95891	2.99326	2.99949	1.16675	2.08617	2.61306	2.76539	2.49014	2.36174	2.7888	2.33337	2.62676	3.11223	2.71738	2.77285	2.51764	2.84095	2.79108	2.58922	2.48273	2.42286	2.701	2.28965	3.2366	2.85936	2.7706	2.17695	2.79942	3.41702	2.71267	3.41774	2.63027	2.25189	3.43363
ENSG00000121060	3.10372	2.79163	2.75207	3.24376	2.56053	3.90729	3.48755	3.39867	3.32074	3.81757	2.51784	3.28793	3.63891	3.0521	3.48215	2.9461	2.88871	3.72815	2.33199	3.20971	4.25472	3.59273	3.72988	3.3379	3.60877	3.00251	2.97774	3.28573	3.61553	2.92326	3.95675	3.48518	3.97118	3.63966	3.05534	3.88544	4.2258	3.74681	3.68921	3.18867	3.78366	3.87284	3.42691	3.29465	4.14478	3.08583	3.94528	3.25615	3.91323
ENSG00000197233	0.037271	0	0	0	0.0320772	0	0	0	0	0	0	0	0.0397533	0	0	0	0.0291761	0.0538786	0	0	0.0245167	0	0	0.0502385	0	0.0436439	0	0.100809	0	0	0	0.0715338	0.0190798	0.0653546	0	0.0502391	0	0	0.0709409	0	0	0.0417662	0	0	0.0800846	0.0318308	0.0455118	0	0
ENSG00000172197	0.440729	2.3759	2.46133	1.49483	3.27281	0.968389	4.34077	4.33996	1.32286	1.79327	2.48199	2.07204	2.97149	2.02399	2.27357	0.0416237	3.85424	3.18461	0.348109	1.39496	1.7932	1.40805	2.89415	2.91641	4.18136	2.69673	3.15498	1.81852	1.54378	1.10685	2.03522	3.48723	3.3103	2.64805	2.08118	1.86481	2.28742	2.0733	3.17718	1.59412	1.9533	2.32927	1.56582	2.95434	2.1033	2.17446	1.34472	1.66101	1.30787
ENSG00000130545	1.75244	3.76042	3.30766	3.6551	3.57397	3.36355	3.46144	3.75143	3.45172	2.64058	5.14304	3.60221	2.79039	3.2151	2.50779	4.2012	4.37602	3.366	4.72725	3.09547	3.81372	3.97695	3.62105	3.93843	4.84587	2.19541	4.82855	2.67473	3.11967	3.74868	3.0218	2.99243	1.93063	3.88414	3.29665	3.03238	3.32247	2.99266	3.57233	3.36405	3.95588	2.87995	3.87136	3.48552	2.53506	1.54954	2.96495	2.45683	2.12097
ENSG00000132953	1.4329	1.47197	1.608	1.90116	1.77164	1.5599	2.70528	1.95301	1.45863	1.07587	1.06272	1.63229	1.80225	0.908457	2.40656	1.2133	1.87304	1.85194	0.6737	1.69051	1.61299	1.75228	2.05303	2.35215	2.20554	1.93314	1.72763	1.43964	1.663	1.57773	1.76821	2.49752	1.96211	2.34324	1.82654	1.56169	2.08721	1.75357	2.23414	1.74177	2.15045	2.2862	2.35002	2.0306	2.42579	1.91224	1.94301	2.01145	2.6589
ENSG00000100012	0	0	0	0.00837293	0	0.0312044	0.0180106	0	0.00529531	0.00438232	0.0324996	0	0.0154649	0	0	0	0.0300038	0.082313	0.0112979	0.0702363	0.00634477	0	0.00754459	0.0260577	0.0418878	0.0113505	0.0325595	0.0199996	0.0338654	0	0.0233539	0.0675463	0.00493082	0.00857124	0	0.0195875	0.00613673	0.275658	0.0669858	0.0173644	0.0275398	0.00543866	0.00625435	0.00515306	0.00704192	0.00825312	0.00593311	0	0.00498054
ENSG00000112697	4.56735	5.25571	4.24024	4.12699	5.55613	4.61297	7.01339	4.69347	4.33486	4.75943	5.1719	4.5093	4.9992	4.04552	4.77014	4.88196	5.42465	5.99771	3.79711	4.54467	5.28132	4.86234	5.00608	4.73305	5.77799	5.08741	5.06441	5.28421	4.7872	4.47718	5.22939	4.54566	4.76996	5.61584	4.73034	4.76833	4.6715	4.89357	4.8695	4.59936	4.88196	5.0603	4.24286	4.6851	5.01541	4.40867	5.01969	4.68623	5.11604
ENSG00000134463	3.11642	0.667549	0.394786	2.34724	3.20774	3.71049	2.99472	2.58776	2.21129	3.10418	0.721846	0.549906	0.412759	0.1852	0.736482	2.31195	0.406946	2.07004	0.211833	2.07722	0.226442	1.56453	2.59163	2.58575	3.11766	0.637971	0.0363413	2.12758	2.24878	1.99858	0.1138	0.433648	1.82947	4.00668	2.28532	1.84072	0.362718	1.1125	2.67555	1.83644	0.239924	1.69381	0.486032	0.523963	0.927751	0.387105	3.57058	0.848642	2.26745
ENSG00000015285	2.70459	0.968372	1.19874	0.694087	2.71357	2.4962	3.03884	1.99272	2.88827	0.942611	1.36582	2.28764	2.43274	1.32676	1.47418	1.4708	2.17242	1.75965	1.25025	3.28533	1.07863	1.77691	1.53787	2.93458	1.87735	2.83029	0.471202	1.68987	1.0424	1.34281	0.941528	2.33602	0.792535	1.03214	3.08452	1.68173	2.16211	1.89747	2.61307	3.00302	1.59554	1.78258	1.75393	1.92674	3.73336	2.22664	2.01773	1.92057	3.24738
ENSG00000116663	3.36424	4.33336	2.91385	2.97734	4.8039	5.45234	3.4255	4.01518	2.46521	2.28769	4.09832	3.05049	3.03574	3.72706	3.81086	2.59585	3.17189	3.47047	3.03344	4.00316	5.41418	4.01295	2.46409	4.12598	2.72055	3.25507	2.63619	2.38564	4.29835	3.48284	3.03682	3.68023	2.34249	3.44401	3.11785	3.02058	4.06777	3.50666	3.18463	4.0848	3.80537	4.19582	2.35653	3.02048	3.21469	4.10231	3.17822	3.19478	4.30297
ENSG00000138658	0.551703	0.806629	0.334555	0.647823	0.699137	0.413401	1.50204	0.379777	0.226709	0.6399	0.321189	0.436339	1.12213	0.531187	0.821673	0.162496	1.09298	2.02483	0.361456	0.345977	0.885784	0.647614	2.13439	1.17491	1.37102	0.593148	0.9284	0.801847	0.436828	0.58213	0.428521	1.21543	0.540647	0.736897	0.600726	0.544368	0.405111	0.382681	0.558647	0.585198	1.27082	0.506893	0.820265	0.629608	0.575567	1.18836	1.04702	0.633499	0.692842
ENSG00000189376	2.23188	3.79677	3.4078	2.77447	2.4725	2.49396	1.43653	1.94123	1.38441	2.65294	1.68666	2.20541	2.39848	2.11488	2.27185	3.25764	2.58689	2.47569	2.13266	2.28952	2.80354	2.21718	2.81424	2.78224	2.60958	2.1146	2.56417	2.21872	2.40426	2.22888	1.88664	2.06686	1.63201	2.47419	1.92106	1.90044	1.50681	2.20607	1.76522	2.22643	1.60828	1.65693	2.01837	2.26106	1.56991	2.42261	2.16599	2.15117	1.95628
ENSG00000204580	5.431	3.61003	5.20037	5.26588	5.84556	4.80986	6.36514	7.09553	4.12997	6.28526	6.28292	6.27333	5.67576	5.26665	5.86485	4.22261	5.85396	5.70678	3.90214	5.21917	6.09138	5.43108	5.59222	5.18843	5.27249	5.42243	6.26216	5.3765	4.96174	5.0178	5.99418	5.35102	5.21443	5.17029	4.68525	5.40009	4.89971	5.33572	5.65244	3.89911	5.40896	4.87711	5.16039	5.87571	4.28735	5.42926	4.86845	6.30383	5.18449
ENSG00000113361	0.479562	0.203219	0.0825973	0.130572	0.163193	0.448994	0.671653	0.72568	0.549449	0.301298	0.177325	0.291772	0.810372	0.310237	0.227761	0.564973	0.116295	0.916483	0.285317	0.47633	0.160119	0.280467	0.330613	0.39413	0.374499	0.838059	0.109424	0.177347	0.31932	0.668212	0.289401	0.440599	0.492882	0.732238	0.777288	0.628597	0.655515	0.615268	0.766042	0.585378	0.359363	0.40258	0.653859	0.803559	1.07957	0.809037	0.28195	0.441806	0.724076
ENSG00000066336	4.08969	2.09386	2.83475	1.70799	4.2476	3.71085	3.52325	3.02285	4.98916	1.58927	1.82748	3.10026	3.30708	2.75548	2.7451	1.74865	2.53823	2.80441	2.24191	4.01324	2.02937	2.79409	3.11252	3.85838	3.01673	4.34423	0.875892	3.00633	1.8424	2.60763	1.94872	3.4223	1.61392	1.88368	5.24722	2.55595	3.03556	3.28617	3.66015	4.44873	2.99411	3.21488	2.63576	2.44214	4.87373	3.32032	3.73028	2.992	4.82461
ENSG00000182405	0.511014	0.892142	0.501868	0.485265	0.245839	0.247181	0.622324	0.296731	0.131912	0.413612	0.301277	0.367953	0.334235	0.244327	0.27753	0.238813	0.456854	0.530608	0.0913021	0.428115	0.954294	0.235601	0.576178	0.216054	0.334717	0.442345	0.882054	0.377425	0.17834	0.29786	0.498623	0.347991	0.369703	0.356816	0.253949	0.420353	0.258224	0.662849	0.540794	0.355589	0.466998	0.313497	0.464968	0.534062	0.604502	0.122993	0.429767	0.533275	0.259821
ENSG00000197782	1.02352	0.730382	0.482697	0.708269	0.860452	0.726361	1.91259	0.852329	0.414516	0.81707	0.593361	0.638969	0.681792	0.652418	1.06266	0.826111	0.902293	1.29283	0.607671	0.912677	0.836551	0.548968	1.11506	1.35482	1.27445	0.92052	0.614833	0.899867	0.437957	0.47138	0.680215	0.83905	0.712534	0.84539	0.731793	1.15231	0.831505	1.11636	1.1159	0.764841	0.845578	0.611238	0.870623	1.26055	1.14376	0.888655	1.07178	0.882779	1.05473
ENSG00000179774	0.0238336	0.0135577	0	0.06104	0.0407109	0	0.0222553	0.0142194	0	0.144585	0	0.0635949	0.0254289	0	0.0255677	0.570385	0.0552077	0.133403	0.0550794	0.0438604	0.0311374	0.033243	0.0550996	0.0480016	0	0.0279311	0.0792822	0.0963943	0	0	0	0.119395	0.0242445	0	0.067322	0	0	0.0362144	0.0153453	0.0143407	0.297435	0	0	0	0	0.0403991	0	0	0
ENSG00000186951	0.753868	1.13182	1.07176	1.92782	1.63992	1.29622	3.22833	2.80587	1.71163	1.87602	1.35078	1.08827	0.774629	1.21204	1.27341	1.86621	1.41831	2.18657	0.714126	1.2013	1.42516	1.2047	1.84244	2.20904	1.98324	1.85856	1.28186	3.99889	1.27793	0.760162	1.31661	1.97827	1.69762	2.74272	1.93807	2.17477	1.6351	2.02077	2.07127	1.58862	2.66385	2.01223	1.82727	2.15718	1.91561	1.77113	1.30231	1.37492	1.44468
ENSG00000101425	0.0918415	0.0318951	0.036932	0.005457	0.00542086	0	0.0349724	0.0112335	0.109704	0.0142177	0.00427369	0.00682533	0.110395	0.0117593	0.0202154	0.0743586	0.0293095	0.00916269	0.0579006	0.134149	0.00413415	0	0	0.0170191	0.0137702	0.0652741	0.014223	0.0043641	0.00556676	0.0183974	0	0.0522525	0	0.00558638	0.0707551	0.00853476	0	0.0333765	0.0400231	0.178106	0.00361606	0.0246227	0.0322837	0.0430453	0.15251	0.0160767	0.00772112	0.0103973	0.127389
ENSG00000204947	0.401576	0.0797713	0.161822	0.478424	0.927406	0.330636	0.753969	0.424309	0.320103	0.258768	0.488404	1.31021	0.618565	1.03932	0.306671	0.118302	0.482004	0.453581	0.0980101	1.08079	0.326507	0.521143	0.260562	0.830753	1.39198	1.12758	0.908296	0.515933	0.249475	0.258014	0.592648	0.544873	0.710219	0.779321	0.844608	0.747629	0.336361	0.60444	0.659444	0.405785	0.541712	0.310513	0.351904	0.479847	0.71089	0.558829	0.57657	1.36226	0.373476
ENSG00000170100	0.655495	0.611705	0.321433	1.2605	0.527578	1.01002	0.694578	0.476554	0.42409	0.746001	0.739176	0.697106	0.455436	0.481501	0.734937	0.798358	0.70178	0.732383	0.202539	0.728164	0.911334	0.555574	0.841751	0.435494	0.934322	0.776942	0.516186	1.01476	0.994016	0.499972	0.646741	0.991544	0.779406	0.548692	0.940194	0.813982	0.377605	1.49338	0.600872	0.712564	1.29594	0.736733	0.998616	1.19058	0.974588	0.457156	0.531974	0.448456	0.524307
ENSG00000121335	0	0.0112001	0	0.0505688	0.0169415	0.00917695	0.0183949	0.0117473	0.0215146	0	0.0266124	0	0.141101	0.0184064	0	0	0	0.0143493	0	0	0.0635331	0	0	0.0397363	0.042774	0.293852	0.022252	0	0	0.111751	0	0.0127863	0	0	0.960764	0.0397368	0.0493993	0.249554	0.156715	0.0235985	0	0.0220937	0.146016	0.0312968	0	0.0168107	0.0120951	0	0.0101567
ENSG00000121064	6.30547	4.06617	5.38855	4.97858	6.68263	5.40542	6.16164	3.38815	4.21138	5.37943	4.33279	4.96397	4.82505	4.36614	4.84085	5.75717	5.21048	6.07001	3.03389	4.06475	4.38422	5.62065	6.0546	5.91559	5.73274	6.04206	5.65232	4.62318	3.71058	4.47657	4.19734	5.81762	3.47117	5.01544	5.15704	5.25557	4.71387	3.72409	4.54781	5.17144	5.2652	4.55718	3.58734	3.76374	4.63379	5.30719	6.15489	4.31246	5.43243
ENSG00000163069	3.36759	4.21667	3.44493	2.21373	3.43532	1.68357	1.50806	2.09973	2.55421	3.62325	2.36962	1.60206	3.68911	2.79321	3.08746	2.79577	1.53745	4.05874	1.39497	2.93168	2.01175	2.50488	3.36287	3.02984	3.64406	3.63431	2.93484	3.35256	1.92858	2.4538	1.97174	3.41451	2.36943	2.2017	3.50655	2.50189	2.71144	3.16176	2.30297	3.32369	2.37262	3.02527	2.95024	2.87207	3.33652	3.50079	2.28669	2.95042	3.25044
ENSG00000145321	0	1.1357	1.28936	0.0256086	0.0127762	0.0137992	0	0	0	0	0	0	0	0.0138826	0	0	0	0.0108189	0.0173446	0.0274195	0	0	0	0.135059	0.0846487	0	0	0	0	0	0	0.0845185	0.00757876	0.0262114	0.0628675	0.0691101	0.0737696	0	0.028485	0.0953231	0.0504379	0	0.0286421	0.0236308	0	0.0377027	0.0538608	0.0642955	0
ENSG00000166819	0.0551353	0	0.0235616	0.0788166	0.0859096	0.0343658	0.0173788	0	0.0101995	0.117842	0.0437226	0.015126	0.0345807	0.00872102	0.0199705	0.0132409	0.0289555	0.0923188	0.0109007	0.0343059	0.00612134	0.0195292	0.0781178	0.0126278	0.0270789	0.242298	0.188347	0.0446348	0.0407402	0	0.0150631	0.0767626	0.0329749	0.00826962	0.134555	0.098058	0	0.123233	0.0818205	0.652961	0.073215	0.0208748	0.0239864	0.00992595	0.707106	0.0158816	0.0396001	0.0204691	0.875027
ENSG00000179097	0.0335869	0.03175	0	0	0	0.0156852	0.150442	0.13493	0.0426829	0.020336	0.0452932	0.0182709	0.0534122	0	0	0	0.0262849	0.177955	0.0131711	0.061636	0.0293704	0	0.0689214	0.0303525	0.0567149	0.0263444	0	0.023304	0.0778102	0.0327985	0.0361635	0.0145933	0.094771	0.248153	0.0712965	0.0527057	0.143298	0.147738	0.0500225	0.231698	0.0257177	0.0376436	0.119237	0.217595	0.163329	0.146761	0.0206581	0.066974	0.128012
ENSG00000238269	0.133893	0.0392252	0.11398	0	0	0	0.0640277	0	0	0	0.0467289	0	0.0369665	0.064067	0	0	0	0	0.155233	0	0.0452247	0	0.203547	0	0.0988885	0	0	0	0	0.0669099	0.0556146	0.0880942	0.0696616	0	0.143505	0.178468	0	0.103267	0	0	0.0396272	0	0	0	0	0	0	0.0380899	0
ENSG00000143756	2.16721	3.60683	3.16764	3.3806	3.07713	2.54282	3.40762	3.402	2.6644	2.87736	2.97749	3.16579	3.78382	2.98848	3.103	2.90279	3.54745	3.40502	2.50078	2.97099	3.40094	2.74217	2.9254	2.82222	3.21897	3.49539	3.67076	3.47668	2.70017	2.35991	2.88156	2.81715	3.74144	3.73574	2.91547	3.07999	2.80069	3.37189	3.19851	3.08872	3.11784	2.81431	3.06658	3.05942	3.21727	3.34212	2.82863	3.0598	3.29994
ENSG00000167004	7.6262	6.81928	6.3321	6.86604	7.34253	6.90514	6.21264	6.86706	6.5186	6.75566	6.29037	7.19029	6.86188	6.85402	7.68036	7.40089	6.4224	7.28294	6.36044	6.75812	6.87981	7.1982	6.51568	6.37407	6.00075	6.86467	6.58594	7.08754	6.78791	6.67642	6.98032	7.0023	6.55122	6.34577	6.45544	7.99415	6.68889	6.47848	6.87524	6.75808	6.59688	6.82687	6.71891	7.4592	6.55293	7.21215	7.01956	7.32605	7.26285
ENSG00000197498	3.10004	4.46479	3.81689	2.41338	2.83044	2.46894	3.25065	2.84291	2.29723	3.10204	3.23537	2.58247	3.42852	3.32851	3.34713	4.28637	3.91385	3.64672	3.46241	3.44333	3.85367	3.56038	3.19817	2.86587	3.33274	3.23867	3.88542	3.59164	3.7322	3.89777	3.24867	2.7189	3.16071	3.6545	2.59308	2.69438	2.97811	2.75706	3.25559	2.42468	2.82235	2.55718	3.11384	3.68674	3.08733	3.09767	3.31002	3.1282	3.31796
ENSG00000157500	1.72684	2.3797	2.34492	2.10173	2.66841	2.75786	3.09985	2.62654	2.26295	2.4878	1.85693	2.16671	3.16188	1.77361	3.12448	1.96515	3.74808	3.98865	1.06859	2.68786	2.36726	2.45829	2.96696	4.14238	2.91632	2.74896	2.87115	2.22913	2.74875	1.48368	2.90295	2.69266	2.67712	2.54173	2.95705	2.34334	2.93576	2.76352	2.74511	2.83349	3.49011	2.82022	2.47966	3.07495	2.7699	2.90323	2.33755	1.93052	3.14675
ENSG00000151461	2.60408	1.46484	1.35396	2.54978	2.64137	2.58778	3.75834	3.70439	2.64597	2.34571	3.46995	2.48566	3.04791	2.50432	3.15079	1.51068	3.69037	3.54957	1.86891	2.62463	3.35417	3.05592	2.9045	3.18397	3.01277	2.98409	2.36925	2.65171	3.88422	2.59963	2.78607	2.91721	2.90847	3.75439	2.74052	2.76713	2.9137	2.66113	3.37632	2.71203	3.20386	2.6869	2.5768	4.16508	2.66267	3.24259	3.39622	3.25035	3.631
ENSG00000123572	0.100449	0.168739	0.0463577	0.00320955	0.028444	0	0	0.00661247	0.137371	0.00167842	0.00502195	0.0140043	0.170036	0.00692247	0.407285	0.111639	0.00867448	0.00539191	0	0.0868385	0.00485802	0.00518975	0.16914	0.00502188	0.0918778	0.305374	0.0856102	0.00768542	0.0130523	0.0108405	0.00599341	0.0496511	0.0262196	0	0.395854	0.0175009	0.00704223	0.170896	0.0142399	0.430282	0.0127107	0.225383	0.0518218	0.0523705	0.0582329	0.0559088	0.0270439	0.0698281	0.258025
ENSG00000124107	9.27577	7.4024	9.9948	8.66935	9.66545	9.80565	6.72374	9.05256	11.8088	8.60462	10.0549	10.7462	4.92536	10.2235	5.985	12.197	7.71296	8.6939	11.7068	9.48803	8.5226	10.8762	3.80929	8.66611	9.01619	10.088	7.63855	7.28672	9.16369	9.63545	10.3004	7.73181	10.144	6.49819	8.33805	10.4822	10.8546	8.86113	10.2003	9.0739	10.2408	10.5574	9.55236	7.90215	9.86532	4.09112	7.42806	9.37711	8.94945
ENSG00000142856	1.40016	3.6487	2.48153	1.94234	1.72614	1.82299	2.11843	1.37877	0.641636	1.3559	1.89929	1.01538	1.92637	1.36111	1.61134	1.24829	2.7259	3.44215	1.17684	1.48937	1.90706	1.44304	1.6839	1.99755	2.30942	1.66825	2.1105	1.18713	1.96221	1.47568	1.39394	1.48902	1.36638	1.94368	1.0235	1.254	0.875941	0.917631	1.1262	1.10322	1.41727	1.08934	1.17593	0.940789	1.07031	1.54071	1.80039	1.27871	1.25839
ENSG00000198113	3.53346	2.60171	3.29607	3.58429	4.65078	3.26103	1.74971	3.38495	2.82218	4.26089	4.31758	4.07176	2.10833	3.6167	2.38144	1.78205	1.61785	1.50622	3.0208	1.5442	3.88656	3.47476	1.61373	1.1316	1.22638	2.65718	0.700304	2.26329	3.52589	3.32767	2.81227	3.13624	3.26051	4.65958	1.84769	3.50041	3.52716	2.98388	3.66391	2.53723	3.73018	3.41626	4.06768	3.68114	3.18202	2.40218	3.69782	3.24973	2.95969
ENSG00000125686	2.18639	1.24647	1.35664	2.3954	2.63113	2.40948	3.64213	3.27613	2.84947	2.25637	2.43882	2.02249	2.35462	2.51142	3.43655	1.71605	3.12975	2.99652	1.55043	2.09286	3.20649	2.53971	3.25188	3.51286	3.31839	3.04317	2.658	2.62451	2.89857	2.18359	2.86708	3.36494	3.25177	2.97358	3.14312	3.10979	2.90428	3.51368	3.29475	2.85613	3.16799	2.83168	3.49267	3.52646	3.38112	3.25928	3.03808	3.34822	3.42003
ENSG00000147571	0.0453795	0	0	0	0	0	0.0213533	0	0	0	0	0	0.036446	0	0	0	0	0	0	0	0	0	0.035475	0	0.0332463	0.0268012	0	0	0	0	0	0	0	0	0	0	0	0	0	0	0	0	0	0	0	0	0	0	0
ENSG00000161594	0.0149295	0	0.0375648	0	0	0.0069481	0.013938	0.0177376	0.03243	0.0135035	0.0400785	0.00809754	0.0779573	0	0.0160194	0	0.0116673	0.0216566	0	0.0275456	0.0195231	0	0.057303	0.0301624	0.0537282	0	0.0663126	0.0307951	0.0262402	0.0145769	0.0120789	0.0288585	0.022722	0.0132261	0	0	0.00947376	0.0114054	0.0659083	0.0355582	0.0589423	0	0.0287737	0.0393516	0.0108693	0.0253604	0	0	0.0229497
ENSG00000258227	0.904365	1.42513	1.49158	0.8148	1.34997	1.15007	0.75784	0.743782	2.11024	0.275617	0.46041	0.563792	1.54524	0.823302	1.06318	0.412155	0.700033	0.846936	0.214641	1.00495	0.285658	1.34095	1.0034	0.838537	1.61163	1.56657	0.404887	1.79431	0.469409	0.613939	0.425068	1.16905	0.794946	0.385824	2.72227	0.771801	1.19743	1.50615	1.194	2.07202	0.760565	0.851323	0.567334	0.418442	1.82526	0.439642	0.925505	0.596906	1.48271
ENSG00000244462	3.0224	3.53557	3.84478	3.57584	3.46505	3.31159	4.01313	4.05594	3.32363	3.68987	3.73848	3.50185	3.64632	3.10926	3.927	3.08943	4.11638	4.4015	1.99352	3.17037	4.14028	3.58808	3.7665	4.4358	3.99647	3.51364	3.67637	3.71461	3.79771	3.23039	3.58647	3.73451	4.09464	3.95474	3.37473	3.55624	3.74156	3.57202	3.83907	3.61298	3.8298	4.35488	3.38159	4.07558	3.74453	3.28329	3.88446	3.57296	3.88361
ENSG00000150593	3.77474	1.58528	3.04772	3.88611	4.36947	4.74061	4.27709	4.60476	3.28329	4.55221	4.46998	4.72553	4.244	4.40061	4.97388	3.71863	5.37441	4.89749	4.45121	5.78201	3.73945	3.81287	3.85203	4.39895	3.67126	4.07796	3.77155	4.74379	5.2256	3.40117	4.45826	3.80833	3.66952	3.85784	3.5053	3.90052	3.4612	5.10387	5.08816	4.43222	4.87894	3.5478	3.58753	3.79366	4.3464	5.1554	4.99747	3.92481	4.87785
ENSG00000086619	1.20539	1.82432	1.42397	1.03557	1.21136	1.00989	4.17262	0.944285	0.424061	1.05576	0.723067	1.0548	2.83221	0.591428	0.671146	1.54431	1.26733	4.18616	0.208868	1.13854	1.15815	0.904546	1.00224	3.62219	3.59267	1.35292	1.00986	0.998773	0.587927	0.423518	0.4323	1.3992	0.632013	0.492773	1.27166	1.56172	0.441746	0.903173	1.23029	0.83226	0.977599	0.61748	0.56358	1.36292	1.26353	1.08481	0.34198	0.418468	1.22052
ENSG00000184898	1.28835	1.87312	1.56208	1.17701	1.56005	0.549216	1.47779	1.16949	0.69568	1.19528	0.594098	1.57922	1.27663	0.879297	1.50594	1.07948	0.963909	1.6729	0.370775	1.2363	1.74181	1.17968	0.932041	0.766038	0.73417	1.3824	0.558429	1.7153	0.677564	1.19591	0.815881	0.72516	0.992051	1.25592	1.10205	0.492535	1.14073	1.08987	1.36376	1.27493	0.864051	1.48435	0.887681	0.971899	1.39301	1.06454	1.23883	1.27361	1.52733
ENSG00000172324	0	0	0	0	0	0	0	0	0	0	0	0	0	0	0	0	0	0	0.0782029	0	0	0	0	0	0	0	0	0	0	0	0	0	0	0	0	0.0231017	0	0	0	0	0	0	0	0	0	0	0	0	0
ENSG00000100271	1.73368	1.1676	2.18989	2.14979	1.52454	1.20277	1.96127	2.35719	1.13336	2.45562	2.02265	0.999382	1.46887	1.31465	1.52413	2.89827	1.83338	2.65015	1.14955	2.45067	0.80546	1.26331	2.16735	1.84242	1.69218	1.9677	2.66767	1.81721	0.762484	0.868409	1.11999	1.28802	1.15917	1.26916	1.9932	1.13282	1.31149	1.68988	1.57173	1.73321	2.00399	0.80856	1.16773	1.45738	1.68414	1.98833	1.42385	2.39229	1.06602
ENSG00000188710	0.546899	0.05955	0.053401	0.373802	0.237362	0.374885	0.187474	0.190886	0.0797946	0.207375	0.369533	0.695563	0.270649	0.305742	0.0453328	0.762815	0.23156	0.269493	0	0.114585	0.291561	0.20921	0.514601	0.111743	0.162627	0.355246	0.399853	0.154557	0.274882	0.19555	0.116533	0.701113	0.277135	0.211606	0.340857	0.60736	0.142208	0.446838	0.106164	0.300826	0.494419	0.0932278	0.478752	0.201886	0.216798	0.251108	0.306514	0.576142	0.195554
ENSG00000161996	1.29887	1.10797	0.795728	1.88831	1.75981	0.763253	2.40793	2.02351	0.409926	1.42616	1.47392	1.25805	3.16467	1.16579	1.74582	0.42472	2.67194	1.90799	0.896196	1.03225	1.29722	1.4776	2.3077	1.79433	2.18899	1.61738	1.5173	1.70073	1.65698	1.42062	1.30768	2.73803	1.02471	1.45227	1.17209	1.42793	1.04977	1.66187	1.94712	0.759877	2.37309	0.748731	1.69282	2.11921	1.02587	0.833511	1.68179	1.71104	1.32028
ENSG00000141639	0.0232084	0.00264985	0.0196433	0.0240783	0.253698	0.015122	0.0216712	0.0193463	0.00255429	0.447405	0.034433	0	0.949635	0	0.0199522	0.0165171	0.00728683	1.69285	0.0324286	0.303819	0.0182699	0	0.0288719	0.109761	0.992089	0.100738	0.0105408	0.170659	0.00823304	0.0136397	0.00377707	0.053527	0.0742263	0	0.185479	0.0589689	0.00296061	0.0764829	0.0817472	0.1339	0.227608	0.0285995	0.0416802	0.00991684	0.0534283	0.0354586	0.0142549	0.0481045	0.0565796
ENSG00000144460	0	0.0207286	0	0.00635698	0.0063149	0.0371267	0.0473407	0.10962	0.0897245	0.0066445	0.128742	0.00398065	0.0156433	0	0	0	0.188413	0.0474124	0.0340173	0.0403845	0.014401	0	0.00572769	0.0393574	0	0	0.0165604	0	0	0.00717399	0.052617	0.0652756	0.0259963	0.00650765	0.131173	0.0198131	0.00465832	0.0388195	0.227069	0.130841	0.155816	0.0123493	0.0696247	0.0117022	0.0577423	0.0125048	0.93345	0	0.0373646
ENSG00000115592	1.37284	0.0299215	0.504674	0.0894292	0.18066	0	0.0775268	0	0.0515257	0.0143942	0.0356674	0.00576087	0.016982	0.0393084	0.644818	0.0447461	0	0.0154281	0.0247102	1.65597	0.158621	0	0.237048	0.0215058	0.0534751	0.343713	0.0120096	0.0435873	0.00938128	0.0206803	0.52834	0.175382	0.851964	0	0.59859	0.0215061	0.00674089	1.61588	0.00683209	0.660772	0.0361997	0.372532	0.721742	0.00566056	0.477613	0.570796	0.206568	0.424111	0.900165
ENSG00000198301	2.62014	3.17019	2.9242	3.22099	3.06229	3.28503	3.42946	3.20376	2.56545	3.0877	2.15597	2.62349	3.0972	2.60202	3.35832	1.58768	3.36066	3.66678	1.57522	2.79521	3.71791	3.31516	3.11039	3.65629	3.37954	2.93015	2.88802	3.40515	3.27671	3.03398	2.79413	3.63847	2.8808	3.74871	3.23181	3.23344	3.0421	3.46727	3.20533	3.2035	3.18281	3.94723	3.67988	3.68277	3.58833	3.69007	3.35071	3.40241	3.56322
ENSG00000170903	1.70276	2.04474	2.79996	1.46595	1.45983	1.34595	1.75879	1.61842	1.01702	1.57525	1.77098	0.591617	1.83276	1.08298	1.74562	1.15545	1.73538	2.09492	0.326366	1.61695	2.06075	1.18942	2.80672	1.94398	1.24518	1.81408	2.46901	1.26038	1.58205	0.799237	1.6213	1.97442	2.12127	1.66346	1.67429	2.15992	1.29266	2.31814	1.62011	1.61587	1.26271	1.4412	1.70492	2.02528	1.84158	1.56332	1.58301	1.48891	1.84022
ENSG00000249115	2.68394	2.06833	1.57298	1.88968	2.38381	2.13743	3.6409	2.11356	1.05857	2.46381	2.22148	1.60269	2.58598	2.02382	2.52754	1.48032	3.07722	3.38255	2.01084	1.56679	2.56361	2.1349	2.3132	3.46646	2.62291	2.05205	1.81357	2.1149	1.7546	2.23383	1.78824	2.96867	2.05933	1.88455	1.58954	1.90793	1.76938	1.86942	2.00447	1.44299	2.88457	1.72876	1.92849	1.93465	1.78404	1.92412	2.11383	1.78696	2.01531
ENSG00000064932	4.12199	1.84474	3.1478	4.56786	5.11258	3.91044	4.85266	4.18877	4.67974	5.02304	4.90935	5.44985	4.86968	4.18385	3.91666	3.07214	4.20482	4.03671	3.70717	4.028	5.43375	5.15623	4.03435	5.22082	4.89721	4.52209	3.08665	3.89608	3.76259	4.39153	4.16485	5.17357	4.1883	4.46656	4.70752	4.67068	3.91346	4.38763	5.66926	4.12345	3.99124	4.51297	4.86609	3.67354	4.7979	3.72707	4.32488	4.34486	4.64807
ENSG00000104870	4.63789	3.66677	4.22488	1.52103	4.4032	3.60495	4.8296	3.80458	3.96668	2.97311	3.86857	3.35456	4.39242	3.73903	3.44947	4.62986	2.66349	4.7625	4.38275	4.08703	3.88378	2.55421	4.43636	5.16224	4.20899	4.49052	2.42073	2.92452	3.31987	2.99823	1.54101	3.71763	1.85741	1.98949	4.49968	3.27966	2.43803	3.18948	3.48126	4.62762	3.92023	3.48559	3.59893	3.93344	4.58133	3.37459	3.43481	3.31211	4.75795
ENSG00000118579	2.05295	3.29393	3.26364	2.11356	1.61701	2.61737	2.77111	1.85291	1.52496	1.5484	2.35106	2.27634	2.78083	2.53361	2.44322	2.42977	2.53379	3.30327	1.68755	2.38127	2.88885	2.19769	2.63537	3.02314	3.20215	2.04332	2.06168	2.25863	1.94931	2.37824	2.15884	1.81151	2.21464	2.66143	2.03951	1.56883	2.02038	2.56334	2.45957	2.70183	2.38959	1.87656	2.08661	2.86113	1.90249	1.83589	1.97623	2.12662	2.54225
ENSG00000235268	0	0.00859343	0	0	0	0	0.0141218	0	0	0	0	0	0.00809362	0	0	0	0	0	0	0	0	0	0.0117978	0.0204437	0	0.0696724	0	0	0	0	0	0	0.00771448	0	0.0639717	0	0	0.02302	0.0667619	0	0	0.0253755	0	0	0	0	0	0.00834212	0
ENSG00000136367	0.146788	0.0079402	0.00592501	0.298023	0.246241	0.0575114	1.49667	0.043198	0.0964725	0.0483877	0.094326	0.0319469	0.327289	0.116505	0.105372	0.0514343	0.0432069	0.639161	0.0203664	0.124614	0.0629979	0.0742272	0.172556	1.17991	1.16204	0.185385	0.129031	0.192882	0.0813175	0.0136486	0.0281082	0.222873	0.0318018	0.0398636	0.234207	0.114231	0.12967	0.195181	0.381999	0.142277	0.165151	0.0408026	0.123752	0.147194	0.230728	0.0672573	0.077443	0.0642411	0.131004
ENSG00000204659	0.249058	0	0.0746368	0	0.0384079	0	0.159935	0.0529005	0	0.0796788	0.0600803	0.0482174	0.284416	0.0417023	0	0	0.166812	0.213899	0	0	0.141215	0	0.0348722	0.0303525	0.474557	0.0522164	0	0	0.0394296	0.0435677	0	0.29121	0.0675375	0	0	0.0600803	0	0.163257	0.264964	0.0533455	0.571068	0	0.0851783	0.0705136	0.0644194	0.075246	0	0.0247154	0
ENSG00000173545	5.3105	5.73521	5.56652	4.90148	4.45154	4.79049	3.74172	4.8889	4.0021	5.00579	4.9331	5.05784	4.93553	4.42275	4.61215	5.95426	4.50116	3.92387	5.60727	4.97818	4.64515	4.4691	4.47732	4.1758	5.11488	4.3296	4.64186	3.92459	4.19441	4.1272	4.37911	4.40718	4.60085	4.55587	3.89609	4.75403	4.10378	4.65295	4.57363	3.97409	3.57325	4.29087	3.91441	4.2939	4.12659	4.4276	3.9877	4.32716	4.29843
ENSG00000162601	0.982883	1.58628	1.34021	1.90335	1.13374	0.781921	2.22683	1.53159	1.01021	1.9999	1.5103	1.1799	1.38439	0.871368	2.04905	0.812254	2.19214	2.2684	0.709052	3.01422	1.73715	1.65618	1.79092	1.5084	1.84388	2.46268	1.89853	2.40447	2.14214	1.29992	2.25327	2.56297	2.14565	2.16976	1.65242	1.32487	1.3443	1.65285	2.02702	1.27949	1.90453	1.44835	1.58559	1.75327	1.57298	1.39986	1.27823	1.4601	1.80971
ENSG00000138772	4.32945	4.08959	5.5758	3.16038	4.59353	2.51184	2.99298	2.94889	3.75818	3.52979	4.60526	2.53644	1.23174	2.82105	3.40494	1.89257	2.0113	3.38822	2.19913	3.04753	1.02855	4.28952	0.737525	2.58675	3.55628	3.14201	2.34639	4.27365	4.27486	5.03833	2.74794	2.83487	3.59827	3.91224	2.4113	3.38021	4.58144	2.85346	3.43283	1.80586	1.93958	3.89563	4.39993	2.53533	2.20602	3.50089	0.913772	3.05443	3.37729
ENSG00000270099	0	0	0	0	0	0	0	0	0	0	0	0	0.0380787	0	0	0	0	0	0	0	0.0465815	0	0.0552461	0	0	0	0	0.096647	0	0	0	0.0460613	0	0	0	0	0	0.0541299	0	0.0842017	0.0408184	0	0.0459267	0	0	0	0	0	0.0366747
ENSG00000153976	1.60201	1.28432	1.53765	1.95004	1.92467	1.10975	1.23695	0.452231	1.71854	2.08249	0.383885	1.40859	2.03013	2.26363	2.99241	0.836706	0.711127	2.04386	0.0918676	1.05507	3.47883	1.23396	0.657499	2.45684	3.78493	0.952923	0.0451836	0.552834	0.189918	2.63269	2.38286	2.52499	1.8654	0.386598	1.31013	3.03264	0.531683	2.78167	1.06765	0.947309	1.79773	0.922157	1.65801	0.124029	1.55429	0.898106	1.39262	0.585588	2.45364
ENSG00000186567	1.8409	1.24144	1.162	2.99537	2.69032	1.64453	1.63864	2.16154	3.86446	1.80004	2.82549	2.57928	1.71535	3.52023	1.8435	0.883181	1.9972	1.74235	3.93827	2.48343	1.31041	2.31373	1.03445	1.00292	0.961358	2.67419	2.56361	2.94776	2.81227	3.65656	4.08978	1.89693	2.00116	2.27206	2.34286	2.79447	4.11233	3.06426	2.2182	2.61433	2.38397	3.48508	1.80313	2.49123	2.27014	0.601209	3.34431	2.69654	1.90264
ENSG00000170419	0	0.00337463	0	0	0	0.0110231	0.0110829	0.00353995	0	0.00269178	0	0	0	0	0	0	0	0.0342563	0	0.0327626	0	0	0	0.00402975	0.0129868	0.00697836	0	0	0	0	0.0143811	0.00385404	0	0	0	0	0	0	0	0	0.0102049	0	0	0	0	0	0	0.00654413	0
ENSG00000055070	5.03215	5.21959	5.21114	5.09708	5.14381	5.57676	5.41131	5.2048	4.71413	4.95294	4.978	4.99626	5.06761	5.2172	5.39809	4.54898	5.18488	4.8222	4.3359	5.00386	5.69729	4.80803	5.04028	5.03711	4.75744	5.19762	4.53776	5.06708	5.13767	4.93398	5.0011	4.89575	5.36829	5.55132	5.05585	5.22394	5.09893	5.12139	4.949	5.02143	5.20123	5.60154	5.07152	4.31748	5.11536	5.35684	5.44473	5.32596	5.33077
ENSG00000087495	0.551049	0.332361	0.0908062	0.0200466	0.0444272	0.0374257	0.0846055	0.0776777	0.0439589	2.25675	0.0918308	0.0125752	0.133765	0.0534899	0.00625019	0	0.113823	0.436015	0.00680048	0.124258	0.0525329	0.0677918	0.246	0.84768	0.408758	0.118286	0.150222	0.0554039	0.0849697	0.0169901	0.0140806	0.070056	0.023554	0.147222	0.242076	0.229612	0.0256423	0.628784	0.132344	0.371295	0.118639	0.51501	0.112289	0.400994	0.328647	0.0584887	0.0457176	0.0750676	0.0985049
ENSG00000121957	1.36386	2.8575	2.30212	2.60112	2.82853	2.27367	3.06947	3.24735	2.29131	2.2808	2.16638	2.57596	2.16147	3.2461	4.15176	0.637337	3.8929	3.18716	1.58416	2.59794	2.44714	2.30455	2.63953	2.978	3.08167	3.075	1.97898	2.90622	2.43984	1.93025	2.60536	1.99201	4.0716	2.94584	1.43532	2.31718	2.4619	2.24398	3.37187	2.90631	3.2677	2.68069	3.37748	3.98434	1.92999	4.23663	3.19062	2.98187	2.54964
ENSG00000151962	0.0175569	0.00499754	0	0.415271	0.0150959	0.00817481	0.0245184	0.00524222	0.00481746	0.0079625	0.0119097	0	0.0280116	0	0	0.00625747	0.0137233	0.0566601	0.0704699	0	0	0.00616645	0	0.00596707	0.006429	0.290098	0.0198319	0.0421223	0	0.0085967	0.014207	0.022694	0	0	0.0497879	0.00596714	0.0055831	0.0134154	0.00565867	0	0.0100811	0	0.00569014	0.00468803	0.00640681	0	0	0.0288656	0
ENSG00000144136	3.40797	4.38142	4.03951	4.82544	3.32908	4.13592	3.36325	3.03739	4.01738	3.90467	3.69422	2.57378	3.74381	4.53301	4.26814	2.75222	4.10267	3.7339	2.99383	3.06426	3.19592	4.26155	4.81527	3.68953	3.97528	4.75801	3.40527	4.46934	3.35327	3.65487	3.08738	3.93346	3.79005	4.90939	3.97986	3.19649	3.6232	3.09054	3.53875	3.45068	3.24119	3.17512	3.85373	4.46229	3.66398	3.05225	3.06994	3.97625	3.74679
ENSG00000169246	0.0298495	0.0503963	0.09854	0.245275	0.118107	0.0277271	0.165996	0.136779	0.0325863	0.386388	0.13629	0.124985	0.148995	0.027894	0.182237	0.0212575	0.129395	0.135913	0.0433806	0.0548362	0.122991	0.0518152	0.324743	0.0648808	0.166088	0.337708	0.0908418	0.417966	0.227259	0.153482	0.230444	0.562791	0.236497	0.23369	0.398898	0.31105	0.136594	0.399472	0.272641	0.100427	0.48963	0.0580554	0.0804595	0.130239	0.155737	0.0380577	0.0981549	0.138349	0.115366
ENSG00000152990	1.57155	1.32548	1.47384	1.69617	0.81383	1.08955	2.69756	2.12529	1.09576	2.11992	2.09164	2.35578	2.469	2.24286	2.22797	1.85032	1.41154	3.52861	0.606948	1.66816	2.80929	1.72541	2.5022	2.41573	2.87245	2.4045	1.89439	2.9243	2.2163	2	2.2316	1.52738	2.57745	2.61031	2.84887	3.10465	1.54479	2.84112	2.19565	2.01038	1.7536	2.11713	2.27708	2.67745	1.77404	1.6009	1.03629	2.36904	1.91367
ENSG00000140521	3.46015	2.69721	2.96053	3.22038	3.46484	2.69946	3.39244	3.25726	2.92301	3.54588	3.62632	3.58815	4.06013	2.94151	3.54293	1.59477	2.89305	3.77659	1.96733	3.39365	3.47051	3.28631	3.16046	3.73835	3.67938	3.51009	3.36522	3.74539	3.56424	2.97408	3.34347	3.64565	3.58655	3.11932	3.92654	3.66891	3.56408	4.08907	3.59031	3.4159	3.67704	3.26674	3.77674	4.69312	3.49818	3.05233	3.26255	3.62436	3.12722
ENSG00000140443	2.78086	1.7963	2.60189	3.3462	3.85582	2.18036	3.9901	3.70256	3.15507	4.63816	3.06307	3.93904	3.37903	3.11784	4.66386	2.66827	2.31331	4.06409	1.51761	2.49913	2.97057	2.88173	3.65581	3.55597	3.47366	4.05537	2.90423	3.41629	2.37869	2.85369	3.87441	4.16187	3.98485	3.82295	4.29056	4.30965	3.66143	4.36262	4.45632	2.71076	3.98209	3.57062	3.89791	3.9048	3.16252	3.6313	3.72356	4.09196	3.4018
ENSG00000164220	3.84885	2.44952	0.505236	1.22838	1.13229	1.95217	1.87333	2.05782	2.44015	0.176313	1.26706	1.74236	3.68372	2.4179	1.61378	1.84118	0.394277	2.0446	0.620583	3.52006	1.33118	0.37495	1.63505	1.43488	1.92633	3.49531	1.16053	1.20929	2.20054	1.2312	0.965697	2.88125	1.56038	1.35229	2.61681	1.99237	1.91228	2.90489	1.91956	2.82716	2.27182	3.2333	3.11554	3.85881	4.23529	1.43822	2.62793	2.84612	4.02267
ENSG00000155926	1.33921	0.689718	0.97727	0.568493	1.77092	1.99109	2.31082	1.16844	2.42363	0.538379	0.950994	1.2761	1.57353	0.863907	1.54236	0.472339	1.6551	1.58132	0.674275	2.13483	0.515155	1.34634	1.29045	2.58136	1.32879	2.22022	0.255092	1.49628	0.411828	0.888221	0.513893	1.60203	0.491186	0.678249	2.01226	1.09374	2.03114	1.05748	2.02983	2.47235	1.04606	1.20774	1.39139	1.57142	2.68075	1.85912	1.24113	1.13443	2.28384
ENSG00000172809	6.81257	7.28554	6.96473	6.52837	5.34923	6.56819	4.80258	5.42313	5.6426	5.69843	6.30489	6.22272	6.16013	6.49443	5.80999	8.50976	5.94845	6.12732	7.35831	6.72544	6.09815	6.61907	7.08632	6.15955	6.24898	5.99717	7.86412	5.691	6.8536	7.45854	5.78767	5.90756	6.31538	6.24362	5.91646	5.93592	5.67171	5.31932	5.21574	5.80756	4.8228	5.40019	5.8483	6.32208	5.31062	6.28308	6.0692	6.57338	5.64249
ENSG00000164256	0	0	0	0	0	0.0254065	0	0	0	0	0.00621832	0	0.0243586	0	0	0	0	0	0.0527839	0	0.0120059	0	0	0	0.0133682	0	0.0103682	0.00634977	0	0	0.0367272	0.0177688	0	0	0	0	0	0	0.00589689	0.136827	0.00526199	0	0.00592968	0	0.0133222	0	0	0	0.00942837
ENSG00000127947	3.43768	3.7145	4.28342	3.71907	3.87394	2.97423	4.64667	4.04529	4.62017	4.61982	3.85989	4.19533	3.80539	3.96664	4.76732	2.8936	4.52871	4.43647	3.28816	4.26131	4.87208	5.22215	4.24141	4.1018	4.26566	5.36215	4.83735	6.0712	4.73106	4.33221	5.15236	3.92332	4.53205	4.67903	4.25347	4.31158	4.24203	3.98422	4.61039	3.70923	3.61716	4.87838	4.52802	4.90813	4.17088	4.69476	3.62014	4.59859	5.19997
ENSG00000173431	0	0	0	0.182076	0	0	0	0.032978	0.11767	0	0	0	0	0	0	0	0	0	0	0	0.0362783	0	0	0	0	0	0	0.0382727	0	0.053753	0	0	0	0	0	0	0	0.0831646	0	0.0332573	0.0317759	0.0311432	0.0357666	0	0	0	0	0	0
ENSG00000274808	0.0117525	0.0133159	0.0198142	0.079417	0.0101023	0.0163372	0	0.0139659	0.0128374	0.02118	0.0548677	0	0.0373055	0.0540734	0.0251136	0	0.0363836	0.0170565	0.131652	0.021704	0.0381314	0.0407035	0	0.00796706	0.0424151	0.0676343	0.0132788	0.0162253	0.0410548	0.0114746	0.268968	0.0377044	0.0297062	0.0104102	0.00843563	0	0.0368943	0.0443315	0.0593648	0.0210762	0.116791	0.0197312	0	0.0248796	0.0588379	0	0.00720749	0.0635076	0.0300031
ENSG00000070193	0.0350086	0.0133291	0.0490824	0	0.0400308	0.0325234	0.0751747	0.336743	0.0064394	0	0.107828	0.0625407	0.0797205	0	0	0.0249444	0.071942	0.987055	0	0.259721	0.0381689	0	0.114929	0.0159061	0.237804	0.449048	0.0264627	0	0.0309305	0.0341871	0	0.296249	0.0646274	0.0513661	0.888433	0.275772	0	0.336152	0.424004	1.3762	0.0980654	0.144933	0.32619	0.834749	1.08344	0.125295	0.0636687	0	0.339188
ENSG00000171467	1.50531	1.7805	1.89478	1.62235	2.05794	0.956649	3.48115	3.56941	1.33366	1.7994	2.06094	1.56662	2.15951	1.38074	3.01214	0.766679	2.50556	2.3696	0.647434	1.40277	2.95309	2.27285	2.39106	1.79665	2.37995	2.23874	2.12582	1.62248	1.88431	1.19954	1.76346	2.78892	2.25255	2.52458	2.10575	1.8968	1.89773	2.31869	2.08521	2.87424	2.36966	1.78793	2.5281	3.47907	2.50732	2.99798	2.25669	2.52517	2.5294
ENSG00000106615	4.56853	4.85754	5.13456	3.52514	4.53442	3.39048	4.22672	3.97466	3.51124	3.1502	3.97815	3.92923	4.15857	3.90647	3.45664	2.90339	3.81241	4.35321	3.28772	4.26278	3.58138	4.07833	4.27973	4.38289	4.3331	4.89493	5.24039	4.37061	3.76434	4.4249	3.77844	3.95743	3.9163	4.72394	4.05397	3.29985	3.32603	3.46829	3.43596	3.87132	4.11035	3.91544	3.21117	4.09335	3.29455	3.70992	4.20272	3.93914	4.34979
ENSG00000100302	3.08377	0.56878	1.48951	1.54824	1.27588	0.424428	3.33964	0.426222	1.31515	4.28748	0.292805	0.700922	3.18141	1.35539	1.86887	2.12103	0.12465	2.1994	0.751599	1.68226	0.0925389	0.307554	0.8875	2.79055	3.88392	4.68566	0.113275	3.55766	0.290558	1.32335	0.547309	0.976998	0.973044	0.863017	2.21143	1.21156	0.370592	2.19123	0.594758	1.16862	0.286073	3.37046	1.27377	1.17632	0.928663	1.45252	0.437155	2.27981	1.09495
ENSG00000185385	0	0	0	0	0	0	0	0	0	0	0	0	0	0	0	0	0	0	0	0	0	0	0	0	0	0	0	0	0	0	0	0	0	0	0	0	0	0	0	0	0	0	0	0	0	0	0	0	0
ENSG00000167371	0.434978	0.0334628	0.081785	0.162652	0.115015	0.0764742	0.072469	0.0917263	0.0322684	0.654313	0.195109	0.0683753	0.535364	0.0725134	0.0930958	0.0622485	0.0903554	0.833909	0.0681334	0.253136	0.0884944	0.139314	0.438047	0.335243	0.483014	0.555479	0.0443243	0.330668	0.150005	0.138866	0.123307	0.770476	0.0836121	0.181924	0.428973	0.183287	0.16091	0.343119	0.432873	0.136599	0.264874	0.0331337	0.0993148	0.174268	0.183251	0.0744147	0.0420469	0.184807	0.108353
ENSG00000256683	1.53384	0.805791	1.54783	1.5967	0.382162	0.753295	2.17239	0.982105	0.664116	1.29623	0.973364	0.98023	1.23325	0.708418	0.188935	1.0185	1.4079	0.826938	0.892599	1.33333	0.895903	0.199386	1.60383	0.951577	1.15597	0.953829	1.26667	1.29246	0.169398	0.724385	0.161602	0.944749	0.879642	1.17319	1.18975	0.278906	0.287073	1.20762	0.824205	0.617483	0.480313	1.12606	0.418554	0.999367	1.17861	2.15505	0.726967	0.53431	0.655265
ENSG00000160949	2.49181	1.068	1.00798	2.47518	2.25237	2.08752	3.40023	2.31815	0.799603	2.53606	2.11457	2.23533	4.36278	2.74514	2.8307	1.85565	2.8823	3.18115	2.307	1.28636	3.31073	2.57897	3.44644	3.45495	3.50553	2.20188	2.05075	2.95813	2.27461	2.51639	2.07136	3.74313	1.73156	2.68135	1.66331	2.5436	2.14152	2.29719	1.78302	2.74617	2.46597	1.14667	2.55552	2.70944	1.76853	2.83612	2.44102	2.03079	2.24408
ENSG00000179195	3.25855	2.7625	2.54887	3.66249	3.56968	3.19204	4.64983	4.21618	3.40059	3.46854	4.6789	2.73094	4.67884	3.33835	3.69627	2.99583	3.49541	4.72275	2.01392	3.97996	3.96221	3.3804	4.10008	4.60963	4.32117	3.66269	4.00817	3.96873	3.89201	3.56721	4.63909	3.75219	4.87739	6.0846	3.47796	5.21368	3.8824	4.67952	3.82274	3.95032	4.22411	3.59727	3.72046	4.63499	3.71517	3.5711	4.19132	3.76431	3.83014
ENSG00000110324	1.75035	0.728828	1.02684	0.686059	1.98061	1.84731	2.91236	1.37018	2.87695	0.635147	1.00126	2.02939	1.82789	1.09467	1.31921	0.819299	1.60111	1.47035	0.848344	2.77836	0.891861	1.89985	1.61169	2.81159	2.09931	2.64571	0.454479	1.38617	0.699974	0.729381	0.974273	2.41195	0.946326	0.481996	3.11041	1.53173	2.40648	1.94691	2.69474	3.05387	1.63536	1.95126	1.73163	1.65251	4.09131	1.58776	1.3448	1.48868	2.99216
ENSG00000134183	0	0	0	0	0	0	0	0	0	0	0	0	0	0	0	0	0	0	0	0	0	0	0	0	0	0	0	0	0	0	0	0.0165791	0	0	0	0	0	0	0	0	0	0	0	0	0	0	0	0	0
ENSG00000105397	3.66453	2.44632	2.2103	3.06346	3.57298	3.28923	4.61992	3.47712	2.44328	3.38846	3.64338	3.08009	5.52082	3.36076	3.79754	1.6316	3.78513	5.00784	1.77908	3.34388	4.042	3.23645	3.57944	5.82533	3.72353	3.61492	3.26981	3.75563	3.2664	3.09791	2.96109	4.11219	3.01675	2.81675	3.25615	2.59912	2.73196	3.52576	3.28101	2.96706	3.677	2.72668	3.38839	3.20971	3.54175	2.99547	3.36152	3.34485	3.25282
ENSG00000147378	0.186479	0.273295	0.159167	0.0562746	0.459828	1.14844	0.578829	0.0954159	0.0533817	0.0296865	0.189194	0.120493	0.316726	0.20205	0	0.238318	0.0756768	0.78149	0.28085	0.118006	0.0428138	0.0230293	0.0256184	1.5512	0.852249	0.0758454	0.142728	0	0.0289786	0.12407	0.152542	0.0834631	0.0167794	0.0290798	0.178749	0.0442391	0.0617027	0	0.122446	0.0392559	0.0188773	0.141753	0.161905	0.0175324	0.283746	0.1349	0.190063	0.0537495	0.130316
ENSG00000144199	2.57627	3.65368	3.50556	2.12296	0.955181	1.93178	0.705705	1.86524	0.426613	2.31038	1.71469	2.04508	1.73904	2.66162	0.562829	2.95234	0.872919	2.25815	1.62663	1.76668	1.85359	0.626958	1.90367	2.20522	1.74758	1.90681	1.8591	0.999159	0.943574	1.85316	0.31848	2.32349	1.53533	1.83117	1.15167	1.21206	0.622592	6.61511	1.16514	1.05097	0.796801	1.02817	0.6211	1.33987	0.736876	1.68984	1.50739	1.17215	0.847554
ENSG00000075131	1.46615	3.02891	2.18275	1.89689	2.47076	1.69901	1.80957	2.15488	0.825768	1.73195	2.26987	1.86733	2.86127	1.85423	2.53671	2.19043	2.41436	2.92657	1.65687	1.80216	1.84171	2.02429	1.80271	2.71401	2.60073	1.68521	2.14378	1.77357	1.87207	2.07249	1.82615	2.15479	1.83852	1.8347	1.25445	1.98199	1.66995	1.53851	1.49621	2.29164	2.0837	1.54513	1.82207	2.12865	1.8066	1.55832	2.4547	2.28823	1.81168
ENSG00000161267	0.768323	3.06156	0.731904	3.69193	1.96781	2.06563	1.9335	2.32291	3.38925	1.22806	3.81061	1.94476	3.15786	2.56761	1.9594	1.98538	2.97961	2.43374	3.73071	2.45056	2.47316	2.33201	3.45156	1.60323	1.58829	1.8145	2.59586	2.41344	4.04483	2.54085	3.31417	2.56077	1.99141	2.46945	1.86984	2.29245	2.87927	2.20793	1.92503	2.91098	3.93651	2.4028	3.37916	3.61611	2.40676	0.871902	1.98902	2.23032	1.79487
ENSG00000100804	6.21913	7.41134	6.32157	7.23719	6.20017	6.55376	5.78494	6.84926	5.83904	5.89793	6.56405	6.82414	6.0276	6.9457	6.77445	7.38001	6.28316	5.46752	7.34586	6.1427	7.06235	6.43175	7.17389	5.86672	6.9725	6.35717	7.38071	6.57643	6.50107	7.02853	6.08753	6.65047	6.2825	6.40698	5.65562	5.26907	6.20484	5.75545	5.92766	5.95729	5.76097	6.00365	6.39057	6.15813	5.65805	6.71378	6.30501	6.15945	6.03247
ENSG00000144749	1.71162	1.18131	1.64108	0.942392	1.70704	0.567169	2.5303	2.62672	1.80485	1.93266	1.71203	1.8261	3.32313	1.08162	2.62717	1.98086	2.48833	4.20203	1.16669	2.42381	1.60675	1.07806	4.01005	3.04125	3.63071	3.17691	3.69788	0.69859	2.00677	1.55275	1.76195	3.20889	1.23158	0.753586	3.33827	1.61475	1.21899	2.19339	2.81937	2.71487	2.24139	2.14126	3.0073	2.64615	3.03164	2.82039	1.4524	1.99771	3.17799
ENSG00000134504	3.1929	2.83901	1.68536	3.44978	3.2362	2.57931	2.53921	4.16226	1.8026	2.59693	2.86702	3.68723	1.99335	1.78976	2.50546	1.90222	3.87387	2.795	1.55738	2.80713	2.92302	2.66556	3.91943	3.10805	3.09444	2.36581	3.49845	2.96249	3.01956	2.21746	2.84658	3.15049	2.67627	1.90396	1.62291	3.10618	2.30772	2.66068	3.02652	2.81918	3.83117	2.87514	2.41522	2.91003	2.79353	2.25112	1.70901	2.19261	3.04051
ENSG00000116833	0.143217	0.291232	0.306964	0.150562	0.13864	0.127411	0.324962	0.322126	0.331565	0.0746038	0.133766	0.30211	0.455012	0.189161	0.193499	0.133905	0.179365	1.63701	0.100824	0.305341	0.0982617	0.0485561	0.18549	0.187901	0.2398	0.533886	0.0624577	0.154118	0.197548	0.193177	0.175259	0.219965	0.245877	0.346454	0.380325	0.417512	0.240959	0.326337	0.249058	0.379857	0.116435	0.226771	0.418842	0.531696	0.623502	0.366397	0.0866566	0.289844	0.509929
ENSG00000140104	1.61442	1.81639	2.71107	2.27128	1.49776	1.17856	1.343	2.50011	0.807492	1.7452	2.27108	0.928868	1.6955	1.46826	2.22868	1.89412	1.85106	1.19949	1.9733	1.73749	2.27983	1.4679	0.738975	1.39982	1.49792	2.16089	2.82605	2.05577	1.97321	1.82857	1.40253	2.19352	1.43259	1.77346	0.785683	1.33372	1.51691	1.56309	1.69662	1.05918	1.56647	1.39419	2.16197	1.63093	0.986269	1.14707	1.07485	2.56418	1.04057
ENSG00000134250	1.87178	1.84213	1.62632	2.44246	3.46254	2.79706	3.5236	3.36657	4.2523	2.92279	2.61639	1.84761	2.60681	2.61994	3.12764	1.57694	2.71119	2.91418	1.13726	2.518	1.04044	2.27137	4.7461	3.17985	3.11332	3.646	1.46623	3.50757	2.85394	2.00691	2.67434	3.0721	3.5177	3.63023	3.6692	3.01451	3.71488	3.23678	3.73407	4.26716	3.9195	4.69125	3.17821	3.64442	3.81718	3.38015	3.19057	3.46486	3.88529
ENSG00000004700	2.19406	3.82414	3.21409	3.37877	2.75884	2.47453	3.81632	3.58266	3.0036	2.97521	2.27868	2.68968	2.87217	2.27836	3.95737	0.70498	3.6364	4.28619	0.52818	2.64063	2.35601	2.87074	3.78718	3.69243	3.59939	3.46565	3.35346	3.56517	2.39513	2.39032	3.03921	3.5213	3.96183	2.56195	3.46035	3.196	3.78571	3.58837	4.03257	3.25798	3.12635	3.49182	3.66218	3.21323	3.82472	3.75296	3.4653	3.76763	3.65817
ENSG00000141560	4.0845	4.30293	3.86662	3.63679	3.2235	2.80815	4.39412	4.126	2.05027	3.11859	4.33279	4.16985	3.35477	4.26321	3.62615	3.2302	4.60667	4.2815	3.72497	3.36502	4.32138	2.91073	4.35186	5.04483	4.79667	3.96776	4.88895	3.93131	3.13336	3.43323	3.38635	3.33642	4.21966	3.18641	3.74074	3.25045	3.35753	3.47723	3.01329	3.38957	4.41483	3.88547	3.39045	3.29036	3.1833	3.87922	4.03786	4.08763	3.05005
ENSG00000136842	1.13973	0.611266	0.394775	0.331987	2.33618	0.214689	2.17376	0.430714	0.158649	0.286155	0.124361	0.269105	0.164346	0.0953124	1.48462	0.232251	1.81652	1.45674	0.0549628	2.45867	0.278994	0.116011	0.655291	0.142122	0.916573	1.20843	0.395802	0.243504	0.167591	0.0994946	0.791468	1.09229	2.62397	1.21324	1.06787	0.159671	0.0419114	2.43385	0.555316	2.22166	0.461491	0.34328	1.29569	0.204136	1.80694	1.51546	1.04441	0.661411	2.04708
ENSG00000006744	3.98429	3.11359	3.71187	3.2869	3.72431	3.90276	3.71273	4.24881	2.73496	3.37724	3.97021	3.6916	3.85291	4.58499	4.42085	3.39627	3.72695	3.00753	3.04806	3.38099	3.73943	3.90013	3.41522	4.15281	4.0309	3.37188	2.74254	3.35435	4.35235	4.24407	3.85053	4.48788	3.49894	3.95194	3.45547	3.8821	4.0633	3.88147	3.64484	3.71846	3.90421	3.15729	4.14562	4.46714	3.98201	3.68708	3.10652	4.37062	4.4949
ENSG00000137726	2.33783	0.533862	0.40358	0.629087	1.76151	0.352788	3.79005	0.452049	0.934505	2.35854	0.0832867	0.361753	2.36557	0.431234	0.337798	1.14755	0.277886	3.62601	0.659326	1.67628	0.145806	0.119005	2.75806	5.20557	2.49887	1.44927	3.53581	0.259707	0.17349	0.397337	0.200369	0.860414	0.269516	0.208438	2.81526	0.712693	0.246407	1.15207	0.572825	1.3206	1.78797	0.763017	1.01635	0.520067	1.75583	0.571788	0.988115	0.761683	1.11349
ENSG00000159111	4.25395	4.57357	4.62101	4.0984	3.94896	4.50352	3.90459	4.03111	3.23511	3.91289	3.78741	3.87838	3.97718	4.02467	4.02589	3.97317	3.86973	3.81611	3.0245	3.8335	3.91764	3.95335	3.63822	4.43197	4.40185	4.04095	4.64139	3.36012	3.79103	3.53677	3.42969	4.14997	4.27853	4.08672	3.73856	3.88144	3.51384	3.85345	3.55285	3.87502	3.67403	3.64989	4.09677	3.96486	3.72501	4.19112	3.79868	4.4019	3.97164
ENSG00000025770	3.63156	5.32662	4.25169	4.02922	4.7127	3.37332	5.4356	4.9283	4.0999	4.39628	4.35542	4.33876	4.79468	4.73347	3.77516	5.94377	4.04526	5.05888	5.0006	3.93846	3.65082	3.30669	4.19879	5.11655	5.30165	4.43832	4.44411	4.35749	3.52873	4.35139	3.01611	4.73786	3.51661	4.11035	4.09095	4.22495	3.07537	3.89589	3.52741	4.15586	4.78063	4.1591	3.60032	3.67994	3.73033	4.36302	4.27243	3.72747	2.96141
ENSG00000163291	0.770297	3.29415	2.00457	1.73817	1.03093	1.12728	0.874129	0.915661	0.907125	1.35244	1.45558	0.7287	1.27915	1.26723	1.02487	1.04257	1.97544	1.76683	0.370225	0.808524	1.55174	0.880799	1.39452	1.46193	1.32575	1.30291	1.94792	1.08498	2.48808	0.831933	1.07072	1.3776	1.06209	2.47135	1.75695	1.2595	0.866576	1.6708	0.817022	1.27199	0.781939	1.55405	1.03623	1.53923	1.23778	1.3128	0.866102	0.958868	1.34143
ENSG00000113657	4.98355	3.48963	2.77917	1.08744	5.35419	2.01523	3.25587	5.88999	3.42986	3.68228	1.74849	2.98877	5.28593	3.52462	5.02012	3.78644	3.06634	5.58143	3.10324	3.721	3.09775	1.39905	5.0002	1.36974	3.2662	5.42074	4.75729	3.3206	3.72798	3.76784	3.0943	4.85597	4.0662	2.10422	6.529	3.72919	2.18256	4.55118	3.75385	5.50881	4.84704	3.98347	4.43439	4.50372	5.10337	3.22743	4.69837	3.92979	4.01725
ENSG00000034053	2.52223	0.8878	0.145596	1.0823	0.854255	0.716292	0.501147	2.12403	1.31972	1.6714	0.488879	1.76568	3.03075	0.984531	0.383326	0.766204	0.372027	2.21488	0.439739	1.08227	0.539656	0.565241	2.34466	0.293927	0.827841	1.21311	0.807848	1.52151	0.968104	0.772113	0.162126	1.15505	0.454827	0.783517	1.65705	2.2141	0.773343	1.26594	0.519189	1.62458	0.458482	1.41667	1.1721	1.07891	1.85067	1.03947	0.577497	1.06488	1.24837
ENSG00000163297	2.53198	2.47146	3.11027	1.82627	2.42534	1.76352	1.47735	1.45978	3.30011	2.29306	0.385448	1.68429	2.25196	1.97506	3.08672	1.02473	0.720471	2.09134	0.363016	1.85102	1.75765	2.39214	2.24439	1.01094	1.67841	2.77025	0.576876	3.98733	0.713218	2.32307	1.53448	2.15902	1.9103	1.02074	2.86225	1.40679	2.25034	2.18249	2.19316	2.53179	1.18154	3.51539	3.99471	1.91017	3.26984	3.1983	0.932829	3.25202	2.31347
ENSG00000173436	3.031	3.99521	2.7959	2.77077	2.25346	3.46275	2.07192	2.26896	1.88876	1.9386	2.7578	2.1818	2.72277	2.22173	2.16451	4.05069	2.8354	2.90445	3.07592	2.8101	3.35723	2.37143	2.16928	2.00515	2.395	2.68731	2.33234	2.23497	3.09705	2.98895	2.21312	2.3034	2.396	2.92638	2.21259	2.39146	1.93581	2.30469	2.0485	2.32507	2.0388	2.08486	2.04929	1.63405	2.27718	2.19604	2.80042	2.31786	2.14705
ENSG00000163536	1.43982	2.96811	0.981062	0.435841	1.09079	1.45238	1.42959	3.96391	0.439902	0.523881	7.1594	1.25716	1.94138	0.362481	0.409604	1.27002	1.24422	3.25828	0.162337	1.06753	1.8199	0.288234	2.39652	1.82381	1.37393	1.32633	4.07056	0.309947	0.74385	0.804479	0.463697	2.26966	0.484761	1.89418	1.43074	0.881369	0.550844	0.69115	0.726405	1.63952	1.87289	0.802241	0.735297	1.20901	2.20703	0.746651	0.837215	0.742569	1.27796
ENSG00000198833	3.84407	4.77321	3.78104	3.21254	4.37005	3.32748	4.28441	3.7479	3.91142	3.41278	3.82354	4.01119	3.88542	3.20751	3.61486	3.8775	4.52432	4.51145	2.60763	4.01477	4.18575	3.32346	3.41065	3.59318	4.27677	4.32035	3.78638	3.87178	3.81252	3.42105	2.92162	3.55447	3.62416	3.80836	4.0295	3.78171	3.52363	3.86153	3.91926	4.02726	4.23204	4.35034	3.70626	4.0486	4.93548	3.46429	3.89781	3.54055	4.00824
ENSG00000079134	1.81411	1.97845	2.00712	1.18	1.64879	1.46888	1.63557	1.76672	0.728298	1.08378	3.02433	0.883339	2.18496	1.5252	1.64596	1.08935	2.67032	2.5991	1.45506	2.04991	2.08139	1.61094	1.98146	1.62804	2.44412	1.68278	2.14715	2.69181	2.74402	2.17352	1.14245	1.90774	1.56766	1.00545	1.46721	2.07297	1.20701	1.38987	1.71265	1.24071	1.684	0.941396	1.49613	1.8011	1.1556	1.70221	1.73344	2.03464	1.75487
ENSG00000163508	0.329112	0.101141	0.597434	0.0975842	0.347406	0.389373	0.896978	0.574515	0.275007	0.130257	0.149996	0.191942	0.50702	0.494991	1.06554	0.0871127	0.696994	0.689546	0.181303	1.6144	0.398297	1.04044	0.0738648	1.02595	0.421629	0.231557	0.931404	0.146949	1.54676	0.211627	0.265026	0.540078	0.257639	0.193186	0.914343	0.317911	0.572288	0.257631	0.58702	0.815797	0.296135	0.164905	0.43107	1.19574	1.87263	0.383657	0.0353048	0.474626	0.597217
ENSG00000167807	0.176007	0.0286514	0	0.113181	0.0851548	0.00787641	0.0468758	0.0200975	0.00926795	0.0676206	0.0341562	0.0718465	0.146699	0.0469048	0.15569	0.0239659	0.11486	0.359506	0.0197431	0.177796	0.0330521	0.103369	0.150914	0.183657	0.152989	0.0965539	0.163514	0.166493	0.044353	0.0807642	0.143881	0.156471	0.0922129	0	0	0.0675225	0.0213972	0.147962	0.115426	0.0302969	0.0479258	0.00951849	0.0325853	0.162409	0.0486584	0.0287244	0.0103825	0.0907175	0.0259968
ENSG00000116299	0.245569	0.188703	0.187684	0.156561	0.691427	0.265155	4.51224	2.20268	0.218671	0.483173	3.5502	0.428341	0.481485	0.383483	0.125723	0.324481	0.441468	0.626164	0.164485	0.299695	0.0850985	0.154636	3.47123	2.47468	1.48766	3.78484	1.61577	0.131327	0.183515	0.221106	0.0811346	0.716872	0.228056	0.160081	2.00033	0.446285	0.282838	0.138987	2.54127	0.288037	0.135773	0.15453	0.109315	0.206168	0.542754	0.0915709	0.202827	0.223703	0.236871
ENSG00000277775	0	0.805699	0.204288	0.552747	0.599612	0.531483	0.69223	0.549595	0.544796	0.217455	0.165853	0.295367	0.43529	0.291675	0.536751	1.01589	1.32097	0.522126	0.275251	0	0.160721	0.628165	0.458211	0.266692	0.479064	0.0981437	0.267149	0.500497	0.454643	0.665017	0.368366	0.978857	0.126363	0	0.0607455	0.791585	0.204096	0.126359	0.34431	0.622549	0.27037	0.52366	0.207747	0	0.384337	1.31196	0.330094	0.220345	0.281843
ENSG00000139890	0.341856	0.226197	0.0885336	0.342831	0.162789	0.143054	0.188709	0.180854	0.0578386	0.712075	0.204218	0.180285	0.336404	0.0565166	0.186205	0.593407	0.433659	0.149073	0.392145	0.11007	0.324412	0.219878	1.47237	0.274992	0.408946	0.248876	0.35399	0.142116	0.294509	0.273611	0.119617	0.414017	0.0689681	0.179604	0.157071	0.120209	0.0853798	0.134785	0.176902	0.132529	0.539312	0.0676617	0.168997	0.0404459	0.138926	0.0516756	0.17757	0.0904886	0.0696482
ENSG00000142233	0.513361	0.0128861	0.102447	0.277604	0.0764125	0.0158104	0.280003	0.00677343	0.0185946	0.406584	0.0305939	0.030565	0.094357	0.0828743	0.0600144	0.0241185	0.0948541	0.222625	0.267103	0.140993	0.0296038	0.0701659	0.839313	0.153831	0.0730854	0.176366	0.0876368	0.0542256	0.0100385	0.107371	0.0364501	0.495624	0.0173202	0.0200779	0.219772	0.132835	0.0286406	0.125096	0.078455	0.040511	0.407458	0.0379418	0.0996652	0.0180973	0.0569673	0.139069	0.0881383	0.0912819	0.0461876
ENSG00000152082	5.94502	5.75696	5.4789	5.88452	5.48748	3.96112	4.35283	4.91287	4.05821	4.55019	5.69175	5.95357	5.64143	4.95767	4.47717	7.48074	4.9833	4.86262	6.70734	4.97068	5.19337	4.65025	5.0881	4.49831	5.17387	4.76757	6.06402	4.23807	4.97666	5.71361	3.89606	4.44324	4.16694	4.9124	4.47186	4.3357	4.10644	4.24651	4.37078	4.67397	4.84617	4.6676	4.62902	4.94466	3.99823	5.13855	5.63069	4.25043	4.11591
ENSG00000229924	0	0	0	0	0.0243165	0.00660872	0	0	0	0	0	0	0.0669831	0	0	0	0.0221119	0.0103387	0	0	0.0369108	0	0	0	0	0	0	0.00983382	0.0125373	0	0	0.00921122	0	0	0	0	0	0	0	0	0.00815087	0	0.0363902	0.0225864	0.0103391	0	0	0	0.0145931
ENSG00000147885	0	0	0	0	0	0	0	0	0	0	0	0	0	0	0	0	0	0	0	0	0	0	0	0	0	0	0	0	0	0	0	0	0	0	0	0	0	0	0	0	0	0	0	0	0	0	0	0	0
ENSG00000260007	0	0.533693	0.0814085	0.272455	0.270807	0	0.0455048	0	0.104389	0.148794	0.158634	0.103418	0.126491	0.469649	0.244011	0.134244	0	0.137302	0.214665	0	0.394846	0.132375	0.27976	0.12827	0.137762	0.111822	0.0549394	0.0992486	0.313064	0.264383	0.15187	0.530684	0.0495367	0.278341	0.069336	0.033153	0	0.0373098	0	0.0582242	0.186058	0.344555	0.208084	0	0.0355712	0.12142	0.171391	0.0535045	0.0252311
ENSG00000143384	5.80262	6.60558	7.24359	6.39215	6.55871	6.79281	6.88003	6.80206	6.78722	6.58462	7.08416	6.86227	6.45563	6.80331	6.7532	6.78397	7.1942	7.1134	6.30655	6.59962	7.8624	7.92995	6.85719	6.95303	6.32833	7.47646	6.73225	6.93173	7.29466	6.687	6.29792	6.33708	6.99906	7.57877	6.83049	6.90049	6.95872	6.54002	7.06721	6.8785	7.12649	6.26675	7.01921	7.22733	7.06576	7.07148	5.97942	6.70599	7.43347
ENSG00000184709	0	0	0	0	0.0250543	0.0796778	0	0.381978	0.0159842	0.0263531	0.541589	0.136589	0.407648	0.425204	0.0312372	0	0.0227833	0.0212298	0.251637	0	0.0750746	0	0	0.0197803	0.0629901	1.54323	0.0964712	0	0.0509972	0	0	0	0.0148878	0	0.0209387	0	0.0367919	0	1.11439	0	0.113364	0	0.0188665	0.0309467	0	0	0	0	0.0299196
ENSG00000132429	3.07575	1.62646	3.51699	2.27575	2.8645	0.486929	3.36059	2.14446	1.98717	2.53425	0.0379019	3.26552	0.363812	3.37679	2.2668	1.48818	1.20761	2.08716	2.511	2.39908	3.51022	2.47922	0.769367	0.861026	0.880818	2.65334	2.10569	3.60125	0.112289	1.82107	2.40334	2.37392	3.20171	0.301096	1.13314	1.86912	0.509295	2.74635	0.37237	1.59081	0.536419	2.08027	2.02544	0.231681	1.45111	1.73283	0.643169	0.459406	2.41784
ENSG00000187003	0	0	0.0199854	0	0	0	0.0437647	0	0	0	0.03188	0	0	0	0	0	0	0	0	0	0	0	0	0	0.017264	0	0	0.0163657	0	0	0	0	0.0120596	0.0209251	0.0169677	0.0475597	0	0.0358792	0	0	0	0	0.0304127	0	0.0172046	0	0	0	0
ENSG00000092140	0.925568	3.09089	2.80671	2.58817	1.57581	1.26731	2.0059	1.97672	0.906834	1.44058	1.27731	1.23106	1.62354	1.36607	2.32586	1.09047	2.12243	1.92888	0.881096	1.13548	1.87949	1.19323	2.69665	1.25562	1.29198	1.84413	2.67278	2.18417	1.67775	1.24044	1.58794	2.15576	1.9923	2.35645	1.35154	0.974455	1.37709	1.70777	1.51636	1.61805	1.0885	0.780249	1.58757	1.89866	1.48477	2.56804	1.59215	1.27325	2.06121
ENSG00000177169	3.7987	1.52831	1.49371	4.1979	3.50004	2.52865	4.20904	3.07649	3.39307	4.0236	3.1046	3.31153	4.51522	3.5747	3.47125	2.94484	3.58809	2.95536	4.03548	3.5254	3.15148	3.01609	3.6559	2.74168	3.60272	3.6639	3.4686	4.2485	3.53685	2.70493	4.84952	4.05409	4.35268	2.75415	2.93702	2.57484	2.90922	4.6149	3.53121	2.81873	3.86545	3.10636	3.12722	2.61275	3.11574	4.17069	3.14392	3.00313	3.34756
ENSG00000162694	1.60889	3.17665	2.55904	1.85418	1.41881	0.872459	1.7549	2.00951	1.06507	1.96177	1.77124	1.46786	2.06988	1.88581	2.02928	1.36264	2.2767	2.91531	0.747725	1.12523	1.29445	1.33756	2.80804	1.67155	1.94066	2.28641	1.95704	2.32349	1.70829	1.42376	1.79799	1.40293	1.91483	2.30374	1.73196	1.37391	0.921999	1.88014	1.26378	1.7724	1.54545	1.83826	1.87575	2.0988	2.04849	1.69354	1.28847	1.99883	1.87898
ENSG00000185630	1.24218	0.318009	0.332187	0.657127	2.24903	1.06784	2.99728	2.1583	0.29952	1.08775	1.88832	1.37689	2.4663	0.239931	0.37312	1.00123	1.9449	2.7303	0.0423863	1.30109	0.270115	0.0630159	1.71388	2.06552	2.82577	1.48263	1.0939	0.606138	0.24397	0.205277	0.115644	1.52992	0.417718	1.10947	1.92499	0.774719	0.250459	1.03368	1.25823	1.92277	2.98592	0.762141	1.17901	1.00347	1.59984	0.769052	0.510056	0.558765	0.917052
ENSG00000166535	3.91491	1.24607	0.371754	5.319	4.05609	5.07206	4.57784	4.43904	7.17616	1.52755	4.2959	3.06466	3.16648	4.22187	3.02538	2.59585	5.69128	5.31513	4.31586	5.97987	3.32668	4.75035	1.91528	3.40831	4.6268	1.40926	5.06455	2.3467	5.79084	4.41194	6.29376	3.22618	5.8824	5.96896	5.449	5.57981	6.74385	5.82049	3.9039	6.14379	5.92511	5.58445	5.4794	6.52756	6.45305	0.160894	5.14824	4.22914	3.78507
ENSG00000082293	0.0248581	0.00472964	0.0175557	0	0.0354613	0.0192654	3.08453	0.0172901	0.0158946	0.00188771	0.00282644	0.00451534	1.03983	0	0	0.0147601	0.0669272	1.76042	0.0242035	0.0973164	0.00818684	0	0.0543097	2.153	2.14996	0.0529634	0.02807	0	0.007355	0.00407394	0.0100975	0.0107822	0.0336177	0.0073809	0.0529455	0.0168762	0.00264435	0.130978	0.0239442	0.0661277	0.0119172	0.0232628	0.0399072	0.0351173	0.0330383	0.0524672	0	0.022811	0.0609639
ENSG00000235961	0.85973	0.0884927	0.130064	0.107305	0.73253	0.0368868	0.681761	0.0926966	0.22741	0.514798	0.221847	0.195261	1.12791	0.209553	0.100139	2.1111	0.0735058	1.60624	0.665984	0.412407	0.196825	0.0552556	0.630169	0.135171	1.22358	0.39434	0	0.177814	0.14836	0.177271	0.0760421	0.576619	0.110336	0.148857	0.634212	0.19353	0.0599242	0.173423	0.0804052	0.279978	0.667235	0.29333	0.0906347	0.0504679	0.295351	0.155955	0.227541	0.174978	0.256977
ENSG00000146221	0	0.00655827	0.00976989	0.00999439	0.0393098	0.00537202	0	0.0273221	0	0.0208166	0.0387311	0.0062613	0.135772	0.021498	0	0	0.0445664	0.0578391	0	0	0.0151094	0.0320961	0.0356921	0.0156172	0.0661418	0.0402618	0.0388023	0	0.0203187	0	0.0186253	0.183089	0	0.0304778	0.0165332	0	0.00732623	0.0349662	1.00448	0.034361	0.133135	0	0.0442307	0.0183787	0.0333355	0.0196361	0.0488676	0.0315545	0.0353162
ENSG00000182747	0.0149988	0	0.0126892	0.0258453	0.0756945	0.00698042	0.0686927	0.0266479	0.0163817	0.00679906	0.0202719	0.0081352	0.016006	0.0140114	0	0.0421976	0.134739	1.23876	0	0	0.00984008	0.0105108	0.0116982	0.126943	0.0433397	0	0.176266	0.0206983	0	0	0.012135	0.0480009	0.00764925	0.0132875	0.14391	0	0	0.0452972	0.0475999	0.0705808	0.0919867	0.0168235	0.0193352	0	0.0109198	0	0.00920236	0	0.00772631
ENSG00000183495	1.63818	0.828794	0.628477	1.8987	1.85512	1.72644	2.78644	2.49136	1.55438	1.92624	1.96215	1.29354	2.66885	1.66444	2.41924	1.01037	1.95403	1.81556	1.14814	1.4485	2.5514	1.7743	2.02832	2.25748	2.26302	2.16954	1.64164	2.15759	1.98357	1.66185	1.88105	2.6684	2.5278	1.72399	1.92772	1.93548	2.63822	2.59725	2.62002	1.89493	2.24952	2.24228	2.16123	2.89374	2.3546	2.46314	2.26043	1.79126	2.32749
ENSG00000163534	0.0791364	0.0152885	0.00762048	0	0.0383116	0.0494798	0.129021	0.0371396	0.053324	0.0202847	0.0302766	0.187756	0.0474553	0	0	0	0.760823	0.0452786	0.0209635	0.202801	0	0.00631031	0	0.106144	0.0261377	0.179316	0.0101818	0.0908149	0.0315499	0	0.00728706	0.101669	0	0.0079804	0.106159	0.0362564	0.00571337	0.0474856	0.0735247	0.0268515	0.0154465	0.0201478	0.0904586	0.226354	0.379196	0.0153276	0.0165083	0	0.0321491
ENSG00000143382	2.89589	1.43123	2.16136	2.81003	2.60191	2.99353	1.14809	2.68046	2.48779	3.99124	4.71032	3.17545	1.10555	2.4173	1.27955	0.477045	1.91363	2.18938	2.65868	2.64199	2.03384	2.71591	1.23612	0.471593	0.604165	2.29144	1.01928	1.68734	3.79533	2.70305	2.22853	2.02053	3.50204	4.77672	2.32143	3.1053	1.722	3.7429	3.07482	2.13287	2.23767	2.26518	2.21861	3.56224	3.38031	1.48555	0.79263	2.19958	4.25365
ENSG00000221916	1.49696	1.1991	0.641748	0.679687	0.701564	0.977348	0.549783	1.33179	0.723995	0.717256	1.06987	0.586916	0.647058	0.992915	0.713894	2.63763	1.88365	1.12458	0.729461	1.19504	1.25629	0.741878	1.84054	1.11539	1.0452	0.951069	2.02561	0.938365	0.995642	0.905676	1.01273	0.808084	0.590411	0.865088	0.53742	0.534731	0.440186	1.02616	0.820304	1.13246	0.96263	0.37576	0.875163	0.897805	0.701634	0.593039	0.630227	0.835069	0.328138
ENSG00000154556	0.741534	0.282537	0.293332	0.158298	0.318298	0.200491	1.20741	0.494874	0.256813	0.484381	0.493685	0.209492	0.535172	0.529176	1.12012	0.358957	0.377484	0.775116	0.0440221	0.52572	0.132909	0.227929	0.292789	0.566434	2.29443	1.1478	0.0680645	0.513883	0.142749	0.410816	0.153101	0.133978	0.209972	0.163537	0.31136	0.844884	0.149516	0.421755	1.20741	0.620407	0.179508	0.286843	0.282062	0.370731	0.461637	0.842058	0.245946	0.283666	1.26122
ENSG00000155275	1.12072	0.540122	0.8229	0.557791	0.685917	1.27799	1.60145	1.1095	0.466656	0.729342	1.7069	0.875123	1.24472	1.47169	1.34191	1.29034	1.33046	1.4084	1.19065	1.62109	1.62478	1.20845	1.12341	1.47424	1.40649	1.10933	1.36758	1.36612	1.43039	1.22834	1.01732	0.928322	1.05299	1.28759	1.17979	0.651197	0.921069	1.41981	1.35688	0.996645	1.36598	0.524897	0.820858	1.45115	1.01175	0.92021	0.693824	1.22969	1.2071
ENSG00000256229	0.353566	1.01195	0.178943	0.163612	0.414701	0.133125	0.41075	1.4142	0.343344	0.0518782	0.205099	0.217595	0.86998	0.112427	0.298407	0.327342	0.239588	0.314937	0.00971767	0.753771	0.125566	0.139082	1.07025	0.155222	0.193471	0.897115	0.0735801	0.413599	0.113263	0.132277	0.0787688	0.4978	0.194357	0.915482	0.683127	0.272148	0.282385	1.38234	0.564747	0.611088	0.183779	0.333135	0.504168	1.55025	0.97633	0.395765	0.25254	0.416025	0.67586
ENSG00000144161	1.52175	1.75331	1.51274	1.80216	0.875255	1.49937	1.24489	1.85369	0.493818	1.20169	1.43534	1.49003	2.13008	1.77728	0.96069	1.32105	2.02412	2.01194	0.526767	1.62782	2.26051	1.47227	1.97038	0.960355	1.4008	1.49755	1.90811	1.12445	1.5756	1.44618	1.1326	1.25152	1.26327	2.00817	1.1874	0.956609	0.849606	1.36837	1.38216	0.849572	1.51119	0.920655	1.47107	1.66114	0.893858	1.33273	1.2752	1.81542	1.37036
ENSG00000119522	1.80633	1.6251	2.2221	1.91816	2.54507	2.21834	2.53791	2.40856	1.68036	1.99449	2.19851	2.10427	2.01097	1.4763	1.9872	1.01846	2.20188	2.25433	1.12388	1.45273	2.49829	2.42207	2.01745	2.36634	2.07353	1.32075	2.15063	1.46637	2.47938	1.51174	1.27977	2.26039	1.93208	3.0667	2.2226	2.13898	1.66426	1.59948	1.95125	1.82964	2.8689	1.67631	2.65691	2.22314	1.90514	2.24534	2.55993	1.95526	1.96806
ENSG00000154451	2.05893	1.8011	0.271785	0.634553	4.36697	4.4465	1.76383	1.7267	2.07631	0.918018	2.21229	0.690925	1.95473	1.77524	4.75842	0.876727	1.63492	1.93419	1.89789	2.73693	3.48272	5.47927	1.27493	2.34158	2.00852	2.71146	0.368392	1.59947	3.62604	2.22734	3.97284	3.688	0.52961	1.35918	3.15851	1.13824	5.01456	0.684851	2.61243	3.66552	1.53536	2.30549	1.32134	1.17961	3.57524	5.82802	1.5138	2.54488	4.86684
ENSG00000118849	2.27736	1.50136	2.17134	2.01497	4.93589	0.949566	1.27499	3.26424	1.74387	0.616601	3.75042	1.01021	2.16097	2.42373	0.969838	2.25025	1.992	4.01195	1.4052	2.80457	1.07857	0.58634	1.21584	1.05302	1.60552	3.50646	0.321097	1.67596	1.77489	0.690221	0.192299	2.81101	0.52353	0.209375	3.49823	0.606456	0.77592	2.11202	4.15518	3.78879	3.25736	1.12959	3.64895	1.20246	4.20117	0.831928	1.46924	0.915074	4.57339
ENSG00000112619	0.508409	0.614091	0.0398556	0.147258	0.127655	0.172324	0.138165	1.2142	0.0824825	0.0267611	0.506531	0.0938799	0.737833	0.0547509	0.157815	0.1063	0.247962	0.311379	0.0547888	0.500277	0.35851	0.0166279	0.270846	0.175035	0.125191	0.979801	0.0660186	0.0958929	0.410218	0.0459307	0	0.261167	0.295787	0.346387	0.923575	0.251792	0.123262	0.788172	0.340158	0.906408	0.17389	0.426545	0.469909	0.45876	1.03416	0.0984383	0.152626	0.495902	0.347573
ENSG00000184351	0.106114	0.518663	0.0902037	0.48135	0.0465402	0	0	0.240667	0.0875331	0.0489341	0	0.0867147	0.891829	0	0	2.34042	0.237245	0.187412	0	0.190857	0.0703674	0	0.34207	0	0	0	1.25128	0	0.0940178	0	0.0438277	0.626286	0	0	0.219293	0	0	0.041409	0	0.0326464	0.120915	0	0.0351102	0.0852457	0.384263	0	0	0	0
ENSG00000197586	3.35838	2.62842	3.20774	3.39748	3.26478	3.28513	3.25446	3.46596	2.54087	4.14173	3.82688	3.17006	3.43254	4.07783	3.52688	4.72895	3.4451	3.68365	3.26886	2.92344	2.97316	3.63204	3.08794	4.14592	3.12848	3.86467	3.70236	4.38133	3.47585	2.27376	3.08298	4.08548	2.90687	4.32281	2.94654	3.35214	2.94333	3.01498	3.85856	2.65434	3.82936	3.86106	3.18713	4.56084	3.0914	3.72438	3.81794	4.08494	3.64164
ENSG00000243649	1.88508	0.783652	1.2154	1.32055	3.64077	0.762192	1.41758	3.30666	0.42184	1.14465	2.94679	0.596985	0.940383	1.54429	1.44419	1.03872	0.729922	1.58043	1.30427	1.74401	2.5783	2.79438	0.281235	0.899238	0.365063	1.90698	0.00802391	1.34774	2.00903	1.0558	1.95866	1.38399	0.476648	0.636675	0.94084	1.45428	3.33528	0.772055	2.93385	2.54974	1.84665	1.30944	2.00002	2.04678	2.20648	2.4627	1.14099	1.09765	3.53749
ENSG00000243317	4.51397	4.47499	4.31223	3.41957	3.06333	3.97397	3.52187	3.58769	4.08277	2.93887	3.89175	3.97995	3.98626	3.62453	3.3581	5.39921	3.91194	4.08029	4.26711	4.70055	3.32417	4.19391	3.72134	3.37918	3.62338	4.05861	5.41892	4.16931	4.54973	4.38195	3.53273	3.06225	4.25906	4.48242	3.43273	3.04233	4.04663	3.51448	2.9639	3.83828	3.84572	3.74908	2.72543	4.38321	2.95103	2.97973	4.05075	4.1901	3.94407
ENSG00000153107	0.875217	1.09178	1.14018	1.45617	1.2273	1.16938	1.96424	2.08909	0.964259	1.14619	1.02288	0.940261	1.65378	1.1814	1.66823	0.797563	1.45571	1.47048	0.337571	0.819221	1.74424	1.00223	2.17008	1.72983	1.93581	1.25272	1.21254	1.05618	1.47199	0.886579	0.983921	1.8543	1.78754	2.26049	1.27446	1.55518	1.41154	1.50903	1.80724	1.56303	1.5194	1.62261	2.17222	2.4611	1.54021	1.37704	1.70122	1.64767	1.69276
ENSG00000129596	0.467713	0.357137	0.0539198	0.0278332	0.0945429	0.0150032	0.17137	0.206676	0.0777616	0.00732574	0.10601	0.150159	0.231837	0.0882818	0.0846693	1.01118	0.144694	0.326322	0.0374688	0.842439	0.0211256	0.0774616	0.69079	0.0750159	0.239712	1.23963	0.123165	0.0442475	0.354129	0.062093	0	0.32793	0.0407451	0.0564242	0.941469	0.085422	0.0604604	4.24748	0.185697	1.82632	0.175045	0.195806	0.60734	0.806083	1.3351	0.556215	0.27128	0.305054	0.705552
ENSG00000102290	0	0	0	0	0	0.0014168	0	0	0	0	0	0.00165171	0.00488246	0	0.00327473	0	0.00950529	0	0.00711797	0	0.00797861	0	0	0.00619	0.00222648	0.0178118	0.163065	0.00211006	0	0	0	0	0	0.0053982	0.246944	0.00619008	0	0.00929173	0	0.00183053	0.00697989	0.00342392	0.00393785	0.00486326	0.00221878	0.00260116	0.00186893	0.00335698	0.00156851
ENSG00000141505	0.706158	0.737578	0.848548	0.184629	0.359004	0.106104	0.135165	0.113881	0.356499	0.335304	0.0992968	0.320936	0.317029	0.490988	0.190564	0.548302	0.12753	0.442164	0.326029	0.314738	0.119226	0.168977	0.275122	1.06421	0.498438	0.594055	0.113426	0.30623	0.18075	0.166083	0.0892231	0.481361	0.12478	0.120823	0.638274	0.175228	0.0930959	0.263939	0.281371	0.504001	0.207206	0.180002	0.252262	0.19771	0.54032	0.265255	0.164562	0.292049	0.364328
ENSG00000064419	3.66785	2.31545	2.91932	2.84088	3.92294	3.54725	4.14366	4.27022	3.75444	3.26566	4.21785	3.7372	4.07893	3.98005	4.1826	2.9023	3.53626	3.51029	2.88129	3.94131	3.54117	3.70085	3.81913	3.5842	3.87288	4.51399	3.93023	4.46961	4.2805	3.73853	3.12247	4.18836	4.28342	5.02564	3.80258	3.43127	4.04183	3.84031	3.83088	4.20804	3.81344	4.12371	4.07143	4.83462	3.66308	5.30301	4.39423	4.1579	4.29936
ENSG00000214216	0	0	0	0	0	0.0168428	0	0	0	0	0	0	0.00648018	0	0	0	0	0.00881892	0.0141442	0	0.00794663	0	0	0	0.00884976	0.0142099	0	0	0	0	0.00980143	0	0	0	0	0	0	0	0	0	0	0	0	0.0192781	0.0175849	0	0	0	0.00623872
ENSG00000165282	1.91718	1.39941	2.57198	1.68622	2.95934	3.58118	3.2184	2.52565	2.51593	2.00237	3.101	2.13482	2.87027	4.10414	2.65885	1.33898	2.88884	3.01887	1.58945	2.31426	2.30236	2.81494	2.34827	3.10254	3.12623	2.07681	1.89743	2.09418	2.79005	2.51198	2.52113	2.27282	2.71861	1.67587	2.62718	2.11491	3.42088	4.12054	2.81859	2.90714	3.10747	2.31732	3.35844	3.04325	2.5251	2.25814	2.65049	2.53226	4.10546
ENSG00000170906	4.53187	4.058	3.81091	3.5161	3.26047	4.15713	3.66083	3.03915	3.0318	3.52635	3.46836	3.01282	3.73482	2.94959	2.81139	6.02908	3.41269	3.63119	3.72563	3.73865	2.97257	3.49746	3.60944	4.38499	3.27124	2.99407	2.70683	2.73717	3.28713	4.39452	2.76653	3.1232	1.99987	3.78899	3.5143	3.12346	3.0475	2.68575	3.02434	3.31449	2.98233	3.13623	2.90456	2.87975	3.33254	3.59663	3.78871	2.90051	2.98825
ENSG00000259417	0.0306447	0.0545492	0.00870112	0.0133312	0.0479752	0.035496	0.00960314	0.00917922	0.00281762	0.0208488	0.0173692	0.0249223	0.0191595	0.0333557	0	0.0182108	0.0200084	0.202726	0.0120099	0.0190064	0.0101062	0.00360731	0.0199687	0.0276909	0.0149857	0.0535184	0.0288868	0.0317676	0.031533	0.0200185	0.00416627	0.0428073	0.0130702	0.00911192	0	0.0173692	0.00652418	0.0541145	0.00661246	0.00925762	0.0205476	0.025839	0.0132679	0.0217904	0.0149341	0	0.0281702	0.0113162	0.0132016
ENSG00000265590	0.253658	0	0.139548	0.543167	0.0294776	0.236861	0.153317	0	0.0738375	0.09108	0	0	0.054468	0.153408	0	0.0484059	0.129327	0.295238	0	0.0628509	0	0.0240532	0.247553	0.176501	0.0977702	0	0.217826	0	0	0.0334515	0	0.521654	0.102104	0.117823	0.0488694	0.458545	0.0217905	0.0519535	0	0.119636	0.114457	0.0193236	0.12838	0.0183135	0.0736925	0.0860317	0.198025	0	0.1031
ENSG00000148200	0.450822	0.234546	0.408862	0.827927	0.85964	0.953328	0.846163	1.23258	0.23832	0.999672	1.21352	0.539179	0.762443	0.364702	0.686336	0.276569	1.01321	1.10583	0.578381	0.39422	0.899726	0.885537	0.984499	0.918599	1.09155	0.668013	0.644628	0.927498	0.606046	0.521867	0.435548	1.19429	0.437048	1.95608	0.901774	0.727705	0.334366	0.629074	0.915624	0.123322	1.3924	0.297668	0.710754	0.666218	0.459291	0.372935	0.858908	0.433316	0.682183
ENSG00000155254	6.36267	4.1025	5.01044	5.08183	5.24862	4.24642	4.51026	4.02922	3.81831	5.72948	4.7584	5.00028	4.88998	5.3251	5.33713	4.53075	2.13379	4.14329	2.92048	4.73743	2.64188	5.0514	4.9299	4.38243	5.03083	5.27619	4.04203	5.03932	4.25992	4.40065	3.89202	4.71521	4.47414	4.48548	5.16107	4.01562	3.71886	4.9622	3.62407	4.55908	3.37408	5.38006	4.99424	3.96279	4.67035	5.01546	3.81195	5.05041	5.08752
ENSG00000157184	2.79576	2.44946	2.66524	3.05369	3.05284	3.55854	3.5562	3.09474	2.18792	2.72382	2.60158	2.56046	2.73143	2.25413	2.80073	2.23126	3.53935	3.29828	1.19883	2.94291	2.64502	2.63313	2.42516	2.49759	3.29972	3.08656	2.9097	2.76625	3.23808	2.18441	2.82525	3.81702	2.89923	3.98533	2.56597	2.51628	2.80463	2.34062	2.89535	2.73271	2.79853	2.92795	2.55938	2.70203	2.91255	2.12886	2.80477	2.69862	2.60857
ENSG00000155252	4.06851	2.03879	3.45874	4.38758	3.85791	3.88046	3.15082	2.94251	4.08035	4.32685	3.53239	4.07351	3.16552	3.83961	3.67884	3.62195	2.90787	3.19452	3.59314	3.72051	2.8886	4.17439	3.10999	3.68854	3.69043	3.85757	2.50684	3.31843	3.87338	3.38798	3.8283	3.80589	4.32115	3.6042	3.9762	4.2063	3.10251	3.76222	3.66424	3.55857	3.77717	4.34814	3.7335	3.26465	3.74594	4.10675	3.53759	3.86466	3.72826
ENSG00000100802	1.66587	0.824282	1.28636	1.36615	1.97821	1.28047	2.23708	1.49077	0.8707	1.92887	1.6669	1.625	1.69285	1.79444	1.69833	1.4016	1.53173	1.97041	1.2455	1.54959	1.80103	1.11011	1.95731	1.81456	2.59353	1.30221	1.60226	1.45596	1.4503	1.40325	1.2342	1.47085	1.27424	1.13322	1.47659	0.973612	0.94663	1.37875	1.48815	1.75252	1.76378	1.10501	1.51997	1.42082	1.25175	1.72596	1.5881	1.41269	1.23048
ENSG00000134986	3.92172	4.24893	2.61305	3.05156	2.91968	2.39156	2.14332	1.69478	3.07295	3.05342	1.29577	2.99856	3.89753	3.25379	3.41781	2.31834	2.38264	4.49016	1.13128	3.14221	1.24351	2.48544	3.84873	1.70701	3.75091	3.35662	2.5566	3.32369	2.16508	2.8704	2.45572	2.22721	1.93023	1.58323	3.55463	1.98102	2.38106	2.9826	2.44698	3.37183	2.79457	3.16728	2.74738	2.32417	3.04679	3.81729	2.56866	2.76167	3.54109
ENSG00000198517	2.84562	1.20413	3.06881	3.59697	2.66986	2.21711	2.88645	3.3594	3.05936	4.54116	4.52283	2.75515	3.52199	3.36541	2.64326	1.12297	3.13687	2.50375	3.03155	2.99433	4.78415	3.55303	3.57651	2.57639	3.1706	3.83643	2.65566	3.46516	3.62226	3.05202	3.07454	3.53002	3.14176	3.95351	3.82122	3.79057	2.17074	4.18275	3.81395	2.94534	3.78244	2.55849	3.79047	3.24969	3.14205	3.04522	2.66291	2.52268	2.77983
ENSG00000115556	0.66364	0.313757	0.372756	0.351836	0.345671	0.676898	0.790279	0.324647	0.587635	0.513348	0.772613	1.2918	0.619218	1.63196	1.37667	0.119718	0.362181	0.759955	0.767156	1.38938	0.601544	1.11191	0.528	0.726222	0.648115	1.13964	0.739658	1.21345	0.688578	0.69183	1.78322	0.710716	2.16827	0.471878	0.691149	0.994829	1.21415	1.35332	0.698767	0.693677	0.569209	0.564319	0.946863	0.876191	0.965788	0.914348	1.03725	1.70227	0.926261
ENSG00000125834	2.74026	1.19499	1.85723	2.87584	2.47666	3.3197	3.50392	3.07026	3.22127	3.91501	2.99108	3.06171	2.98784	3.10161	2.48507	2.53815	3.45835	2.95369	2.10099	2.36482	2.55892	2.67828	3.23907	3.72791	2.33288	2.90216	2.09052	3.7685	3.2333	2.06449	3.38001	3.45647	3.60781	3.49897	3.15124	3.80491	3.19851	3.86189	3.73284	3.29674	3.97172	3.65662	3.73293	3.80938	3.13864	3.8204	3.64294	3.42672	3.1963
ENSG00000054523	1.88004	1.38775	1.12837	2.06851	2.3019	3.01651	1.94892	2.79987	3.00781	2.27334	1.81737	1.82838	1.97245	1.74359	2.56358	1.43226	2.47976	2.37451	1.78916	2.32035	3.45669	1.67164	2.962	1.78732	1.33442	2.99418	1.67475	2.3513	2.90938	1.73737	2.75762	3.07446	3.40531	3.06606	2.628	2.62008	2.79149	3.52952	2.69012	3.15585	2.50271	3.12084	2.87337	2.07328	2.81112	2.63749	3.15442	2.49168	2.73808
ENSG00000165323	0.0543073	0.0104187	0.0293291	0.00954075	0.00947766	0.0178682	0.44022	0.00328705	0.0387822	0.0132805	0.00623119	0.001995	0.0244088	0.00172169	0.00197881	0.0169281	0.0114744	1.03789	0.0064503	0.00341454	0.00241417	0.00129016	0.0466631	0.739134	0.162732	0.142145	0	0.0101672	0.0048744	0.00539275	0.00891857	0.0118947	0.0102857	0.00326289	0.180057	0.00995703	0.00815569	0.080744	0.0164849	0.137097	0.0230579	0.0458495	0.029468	0.0117216	0.0896934	0.00314158	0.0543127	0.0101142	0.123475
ENSG00000213445	4.53142	2.82709	2.36415	2.57911	3.55374	2.6252	4.06105	3.22757	3.05366	4.16882	3.40564	4.05706	3.17013	4.27251	3.73282	3.92414	3.07024	2.97249	3.59291	3.4074	3.06234	2.56444	3.37429	3.71402	3.36071	3.602	2.11906	3.05968	2.38745	3.75001	2.311	3.34646	2.17805	3.94161	3.34717	3.00588	2.22362	2.96854	3.37155	3.18559	2.41988	3.34877	3.48487	2.55724	3.72465	2.86292	4.44834	3.03787	3.46121
ENSG00000106853	3.55866	3.61051	5.05388	3.47458	3.95937	3.65375	3.24787	4.75648	2.75575	3.24154	4.03673	4.14376	2.65445	4.10223	2.73076	3.84315	4.69665	4.38521	4.24886	4.06804	3.61698	0.845686	3.73577	3.65287	3.50407	3.25443	5.7757	2.255	2.94428	2.86882	2.72009	3.89838	3.40039	4.13382	2.93871	3.45354	2.56684	2.87132	3.31785	2.55921	3.81398	3.97448	3.66414	2.5281	3.24489	3.47845	3.44999	2.65424	3.91715
ENSG00000138326	8.0111	7.70614	7.72456	7.26135	6.36679	7.49181	6.42684	6.1732	6.8168	7.81025	6.8188	7.76675	8.1657	7.17494	6.83032	8.37257	6.47891	8.04979	7.86657	8.07327	6.1322	7.73015	6.79765	7.46393	8.1495	6.58652	7.90134	6.50073	8.45251	8.05769	6.31213	6.78625	6.74151	6.63655	6.88647	7.37186	6.88571	6.22928	6.5664	7.27806	6.32521	6.35638	6.78861	7.27986	6.6628	7.22299	7.61207	6.94484	6.76365
ENSG00000116688	4.5205	4.04338	4.22118	5.59528	5.41553	6.11286	6.11626	5.55576	4.64855	4.98188	5.34163	4.84265	4.87229	5.35994	5.76169	3.83918	5.7247	4.72918	4.30891	5.07959	6.33447	5.39774	5.10137	5.33958	4.28237	5.52744	4.39394	5.47373	5.43156	4.76615	5.24424	5.80911	6.0901	5.9909	5.23037	5.86761	5.79117	5.86546	5.71006	5.70651	5.71227	5.85785	5.60721	5.00381	5.46027	5.55217	5.64222	5.77461	5.43611
ENSG00000076067	2.86008	2.40839	2.43105	2.26789	2.40359	3.72053	1.82156	2.70208	2.45917	3.3723	1.62888	2.17613	2.33927	2.23499	2.88665	1.56665	1.68928	2.25329	1.88685	2.06192	2.43851	3.17818	2.31637	1.30507	1.75862	2.52227	0.939532	2.09863	2.20445	2.65974	1.8335	3.09536	3.373	1.09448	2.88899	3.27781	3.21546	3.55827	2.54295	2.92294	3.37671	2.59918	3.26624	2.95572	2.82752	2.82109	1.84897	2.85947	2.99203
ENSG00000185565	0.541842	0.360731	0.151806	0.0866733	0.159455	0.256937	5.51691	0.35565	0.715039	0.0992255	0.255668	0.29698	3.22458	0.318904	0.144087	0.367106	0.63879	2.24297	0.174073	0.550284	0.226949	0.113462	0.110961	0.162936	0.637289	1.45234	0.347654	0.886032	0.734004	0.285708	0.0890304	0.808142	0.375661	0.136599	1.28019	1.42764	0.618322	0.886408	0.458193	2.26001	0.337759	1.274	1.50483	1.51158	1.85527	0.372929	0.452328	0.749735	1.05768
ENSG00000106633	0.259866	0.161762	0.057203	0.148766	0.909668	0.141043	0.023958	0.0749783	0.0690361	0.0573487	0.154941	0.0549661	0.34636	0.0784076	0.0545278	0.0182635	0.153219	1.59749	0.0879757	0.107799	0.0982868	0.0934993	0.122378	0.196314	1.79114	0.010091	0.0193779	0.0469513	0.288795	0.0976997	0.0138811	0.439626	0.0559608	2.49264	0.118704	0.149685	0.0536403	0.083145	0.0912193	0.119135	0.228067	0.0754661	0.0812198	0.0715928	0.102885	0.0576727	0.178664	0.0785291	0.0943832
ENSG00000163682	7.41874	8.69711	8.56415	6.42552	5.72285	6.66318	5.98981	6.14579	5.45427	6.63391	6.90165	6.70352	6.4323	6.55285	6.11403	9.17502	6.25261	6.88142	7.461	7.28618	6.58327	7.02109	6.27688	7.57077	8.32134	6.09348	7.55502	6.56448	6.53999	6.93374	5.91951	5.59416	6.13544	6.75577	5.94374	6.36707	5.9134	6.35841	6.30536	6.6397	5.55101	6.07917	5.77103	6.33284	5.96239	6.57653	7.27832	5.91708	5.9405
ENSG00000174946	0.3809	0.139081	0.128136	0.207158	0.772257	1.19783	2.23005	0.518873	0.838273	0.0953027	0.523084	0.391907	0.811533	0.299671	0.668752	0.108376	1.08065	0.977106	0.174212	1.70717	0.354818	1.06729	0.513982	1.57106	0.556724	0.952233	0.0656806	0.541791	0.0682838	0.147001	0.315239	0.557083	0.13463	0.226804	0.669756	0.354961	1.1992	0.371194	1.04742	0.94299	0.314799	0.263507	0.330112	0.409893	1.81403	0.797066	0.285282	0.55435	0.862844
ENSG00000204231	4.10121	3.52289	3.7973	3.36618	3.57717	2.43024	4.19999	4.71403	2.60128	3.92299	3.74723	3.60872	4.1623	3.10428	3.61749	2.89773	3.92484	4.35077	2.6067	3.78258	3.53723	2.93774	3.71975	3.34339	4.41697	3.5926	3.92781	3.16789	3.30093	2.62805	3.36985	3.31291	3.24212	3.53142	3.2963	3.52993	2.6028	3.92363	3.36991	3.04226	3.97821	2.68121	3.54512	4.20897	3.50598	3.99368	2.90618	3.35646	3.3817
ENSG00000011198	1.68134	3.5674	2.49024	2.79531	2.66635	3.66977	2.81897	3.19849	2.73285	1.95503	3.24601	2.04427	2.31446	2.14118	2.90024	1.72298	3.7727	3.28154	1.95868	2.85527	2.685	2.69753	3.02907	2.90048	2.20711	2.28855	2.71405	2.14496	3.99035	2.14716	2.78368	2.64233	2.52114	3.61642	2.46877	2.78629	2.69133	2.82101	3.13722	3.01438	3.24886	2.61569	2.39631	3.23401	2.84203	4.24594	2.08757	1.94248	2.55486
ENSG00000143162	4.99128	4.81678	5.07045	5.88703	5.02031	5.55343	4.43484	5.43623	4.8655	3.81851	5.52722	4.85993	6.10508	5.01327	3.68183	6.19157	4.99353	5.23285	4.73597	5.88657	4.64945	5.15827	5.34206	5.36604	5.20334	5.29397	6.48786	5.26059	5.81087	4.86501	3.9079	5.19209	4.14701	5.30282	5.59486	4.97158	4.39949	4.839	4.43421	5.60483	4.36477	5.84671	4.44773	4.23884	6.09251	4.45629	5.30814	4.53341	6.03252
ENSG00000111846	0.471692	0.553607	0.457297	0.16062	0.712592	0.153798	1.7835	1.60354	0.271227	0.683188	1.41812	0.254656	1.01055	0.102667	0.101765	1.08514	1.15352	1.03936	0.216922	0.499634	0.508637	0.0459948	3.02947	0.495011	0.716993	0.895141	2.40797	0.204788	0.729769	0.0856325	0.086289	0.635694	0.220162	1.29656	0.933504	0.158548	0.0727901	0.411871	0.834519	0.342401	0.305124	0.1526	0.133163	0.728902	0.39704	0.0845547	0.137578	0.0839802	0.535267
ENSG00000105258	4.94855	4.85483	4.26151	4.2865	3.88123	4.59954	4.53216	3.2465	3.31284	3.33593	4.44848	3.28013	3.93149	3.81189	3.23963	6.1671	4.11542	4.33885	4.79706	4.03003	4.28905	3.71721	3.83063	5.02528	4.40574	3.23465	4.04291	3.58013	3.81709	3.70524	3.0479	3.34795	3.23418	4.17631	3.66514	3.67931	3.0266	3.27816	3.51582	3.74001	3.67233	3.60193	3.70894	3.71433	3.32758	3.39761	4.07319	3.56279	3.41451
ENSG00000184209	2.93773	1.49089	1.07511	1.94006	1.72931	2.21397	2.14399	1.70559	1.57585	1.52046	2.09969	1.53075	2.33849	1.83631	1.81034	2.27035	2.06692	1.91268	2.35558	2.73206	2.2298	3.29512	1.69186	2.21414	2.25248	1.73811	2.36246	1.90904	2.36372	3.09954	2.18126	1.89783	1.96924	2.08698	1.3703	2.13638	2.09584	1.97503	1.68842	1.57899	1.82858	1.79419	1.33532	1.63993	1.9392	2.03529	2.19349	1.614	1.84801
ENSG00000136490	3.25107	2.4258	1.76097	0.962056	2.54778	1.8545	2.69257	2.1114	2.09429	1.93732	2.6039	2.28344	2.21536	1.70531	2.23874	2.1631	2.87719	2.94143	1.75923	3.24525	2.16045	1.47008	2.53112	3.24872	2.53948	2.87964	1.60873	1.81476	1.77604	1.24767	1.31902	1.94708	0.785899	2.19498	2.22429	1.37877	1.37078	1.95239	1.87771	2.21876	2.22583	1.67735	1.75757	1.87947	3.2345	1.7506	2.02501	1.92871	2.4611
ENSG00000136485	3.5674	3.2616	2.9562	4.15751	4.14398	4.08605	4.80087	4.80067	3.6646	3.41491	3.91903	3.6377	4.06027	3.97455	4.25727	3.22397	4.21263	4.55604	2.17399	3.21451	4.2066	3.60938	4.7732	4.6295	4.35664	4.24406	4.01225	3.88639	3.68177	3.265	3.33423	4.43091	4.22777	4.39719	4.33718	4.4321	4.17818	4.04068	4.47567	4.25613	4.38393	3.78743	4.2489	4.98592	4.33464	4.61535	4.3417	4.83724	4.21391
ENSG00000155366	6.73534	7.42922	6.95254	4.88927	6.67259	5.47894	4.7692	5.7666	5.27961	6.08946	6.2772	5.24108	4.98887	6.05156	5.1761	6.62466	5.66491	4.94581	5.8459	4.93612	4.81656	5.99278	5.80477	5.53519	5.87238	5.7825	5.49133	5.44968	4.14228	4.83909	4.43552	4.79925	5.88468	6.79205	5.51081	4.76511	5.72366	4.40009	5.47555	5.06477	4.9753	5.57896	5.28159	5.49748	4.7648	6.02523	5.75913	5.67983	5.29095
ENSG00000064309	0.243346	0.206943	0.314743	0.117001	0.274761	0.168809	2.08132	0.449005	0.15622	0.47947	0.309568	0.179051	0.647156	0.168384	0.804423	0.199905	0.433378	1.39038	0.0310202	0.617707	0.359854	0.172396	0.919487	2.18407	2.42559	0.372711	0.947185	0.424914	0.264342	0.0950683	0.334904	0.801049	0.288344	0.149436	0.591586	0.611159	0.347682	0.650433	0.438655	0.776307	0.565123	0.407399	0.358681	0.960459	1.11324	0.164701	0.222331	0.40323	0.586806
ENSG00000183145	0.604937	0.116846	0.302938	0.232273	1.79702	0.116199	2.00936	0.0884316	0.00835539	0.31623	0.0510054	1.19079	0.184197	0.376101	0.0163697	0.647194	0.683286	1.98551	0.136646	0.10943	1.00683	0	0.241478	2.39132	1.55147	0.216848	0.209432	0.131652	0.0400333	0.0296393	0	0.846735	0.0685615	0.0135156	0.14627	0.229878	0.00968142	0.323607	0.0859967	0.0182796	1.47711	0.0835995	0.0676908	0.0322532	0.107404	0.0259132	0.249471	0.033365	0.0541361
ENSG00000101290	2.33819	2.37865	2.17644	1.88955	2.13911	2.30185	2.92209	2.05329	2.08607	2.92603	2.52051	2.18444	1.79935	2.49274	1.6428	1.92466	2.23979	2.36336	1.20183	2.58439	1.86998	2.05771	2.44214	3.60503	2.09254	2.46276	1.85407	2.61502	1.87078	1.47552	1.91758	2.58222	2.58351	2.3014	2.82524	2.3287	2.14921	2.37083	2.48652	2.42116	3.03503	2.69318	2.50947	2.76512	2.6384	2.82415	2.88496	2.55811	2.42697
ENSG00000137507	3.51162	1.82438	1.43112	1.73284	2.05939	2.46431	2.02872	2.00529	3.05802	3.22181	1.82134	2.24293	3.34861	2.18656	2.23183	1.96966	1.29539	2.41057	1.29083	2.66636	1.57031	1.82438	3.1076	1.84557	2.25804	4.76179	0.944877	2.10904	2.08036	2.7476	1.66326	2.52988	2.12741	2.78322	4.1245	2.92156	2.38974	3.20111	2.38505	3.82949	2.61951	3.31532	3.79759	2.91686	4.15914	2.92831	2.74217	3.12892	3.60832
ENSG00000172795	1.63957	1.59289	1.56571	1.81104	1.5657	1.85751	2.32524	1.69103	1.67115	1.20453	1.19946	1.387	2.02381	1.49727	1.94215	1.77568	2.15634	2.64555	0.748535	1.63991	1.8483	1.68029	2.06575	2.13027	2.58391	1.87198	1.26828	2.4435	1.72507	1.25159	1.59188	2.27406	1.71748	2.04463	2.03293	1.94223	1.85428	1.56203	2.25761	2.12459	1.65645	1.54665	1.64331	2.46514	2.20404	2.12779	1.80483	1.54153	2.81876
ENSG00000198183	0	0	0.0275484	0	0.185417	0.0151896	0	0.464358	0.104016	0.141545	5.27959	0.11953	0.134067	3.03909	0	1.30658	0.0254574	3.49561	4.25464	0	0.0424625	0	0	0.20714	2.37185	0.892558	0	0.191441	0	0	0.102633	0.27109	0	0	0.177349	0.263899	0.176321	0.0248885	4.62744	0.285499	1.0594	0.206116	0.234699	0.408572	0.857923	0	0.3073	0.263951	0.174919
ENSG00000130656	0	0.0264579	0	0	0	0	0	0	0	0	0	0.0252677	0	0	0	0	0.0363122	0	0	0	0	0	0	0	0	0	0	0	0	0	0	0.0887166	0	0	0	0	0.0295324	0	0	0.0554249	0.0267302	0	0.0595726	0	0	0	0	0.0256888	0
ENSG00000138172	3.53473	2.56857	2.5413	1.44458	2.88595	1.98542	2.68563	2.77978	2.4994	3.03492	3.12294	1.78871	3.43597	3.12408	1.71825	1.43643	0.851952	2.91111	0.830519	2.68018	2.22101	1.2555	3.23897	3.2448	2.98568	3.15435	2.04283	1.75938	2.09124	1.47564	1.08103	2.54415	1.86029	2.65748	3.51185	2.33296	1.7704	3.04979	2.08703	3.15404	1.88691	2.08123	2.25976	2.52953	3.46767	2.94244	2.29709	2.35363	2.93115
ENSG00000010256	5.77933	6.82434	6.90224	5.8945	5.99707	6.90112	6.83467	5.84773	5.44232	6.20168	6.41096	6.08929	6.0012	5.21605	7.00421	6.9085	7.04432	6.29258	5.86658	5.76949	5.85564	6.42938	6.0319	6.79312	6.03365	5.32964	6.68342	5.44991	5.84245	5.7465	5.68006	6.49765	5.89094	6.11396	5.65779	5.75272	5.72256	5.64427	5.71447	6.16378	6.2896	5.31463	5.77731	5.77175	5.34621	6.25836	5.82343	5.69389	5.74352
ENSG00000196341	0	0	0	0	0	0	0	0	0	0	0	0	0	0	0	0	0	0	0	0	0	0	0.0530256	0	0	0	0	0	0	0	0	0	0	0	0	0	0	0	0	0	0	0	0	0.0183135	0	0	0	0	0
ENSG00000004838	0.119146	0.115905	0.169617	0.278256	0.0742713	0.0644188	0.716131	0.0870038	0.0335374	0.0742496	0.131926	0.0379016	0.384333	0.0648015	0.0922185	0.160778	0.206154	1.28924	0.0408691	0.110724	0.079129	0.0960489	0.0806417	0.827299	0.711095	0.444502	0.0492943	0.128996	0.333903	0.025752	0.0423948	0.624314	0.083295	0.0615084	0.23432	0.115387	0.0278251	0.178081	2.65935	0.0776787	0.276568	0.0489467	0.12605	0.0735601	0.129461	0.051989	0.0843979	0.108114	0.0448802
ENSG00000138778	1.31193	2.21088	0.900904	1.515	1.71599	0.765753	2.06409	2.01575	1.0314	1.88282	1.12354	1.27306	1.72204	1.4022	2.35271	0.594273	2.29823	3.03731	0.3974	0.787121	2.62758	1.25918	2.1686	1.42546	1.74172	1.79462	1.95832	1.83446	1.66426	1.54799	1.37226	1.97354	1.44201	1.78655	1.37236	1.03796	1.60811	1.07821	1.38706	1.73463	2.23455	1.47198	2.25997	2.0062	2.08715	2.87526	2.38177	1.7397	2.12699
ENSG00000055332	2.69638	2.19008	2.39184	2.62737	3.59866	3.70906	3.2526	4.12148	2.34157	3.92312	2.47315	3.10989	3.63643	3.43858	3.8588	1.43269	3.39422	4.29321	1.19926	2.8486	4.17394	3.34432	2.96836	3.35242	2.31975	3.08498	1.97976	2.54067	3.38936	3.24089	3.12461	3.53125	3.05385	2.83394	3.29792	2.49397	3.55082	2.8317	3.35944	2.62491	3.6397	3.88439	3.14033	3.45815	3.31238	3.80171	3.72956	3.63718	4.70405
ENSG00000263201	0	0.145522	0.0980778	0.124276	0	2.43886	0	0.0525717	0.110452	0.053272	1.10766	0.153898	0.180471	0.0817269	0	0	0.0461136	0	0.0684703	0	0.749506	1.36294	0	0	0.0642379	0	0	0.0409157	2.49195	0.165895	0.138672	0.129993	0.509257	0.243907	0	0.670446	0.0920494	1.6594	0.0380297	0.169626	0.0996167	0.0496654	0.0569847	0.0158697	0.145188	0.0253604	0.0182618	0	0.104107
ENSG00000188306	0.0572508	0.0109925	0.0485434	0.0976358	0.0653922	0	0	0.111348	0.0211171	0.0433403	0.0390072	0.0104955	0.090612	0	0.120226	0	0.116719	0.58525	0	0.0704052	0.0377483	0.013557	0.0150868	0.051778	0	0.0669615	0.0645556	0.0398223	0.0170738	0	0	0.155199	0	0.0508025	0.0681498	0	0.0122775	0.0582242	0.0247802	0.133707	0.158233	0.0324074	0.0971857	0.040817	0.109001	0	0.011871	0.0106713	0.0297008
ENSG00000012211	2.94624	2.02548	2.25044	2.97614	3.34539	3.26101	3.63094	3.43219	2.83083	3.28647	3.11362	2.38472	3.65694	2.36709	3.16115	1.25492	3.67368	2.6521	2.2509	2.36402	3.25513	2.67941	3.43795	3.56596	2.64211	2.24798	2.6445	2.85456	3.0882	2.88114	4.01656	3.17326	2.54626	2.89613	2.24008	2.86934	2.831	3.35121	2.8811	2.26175	2.98353	2.26915	2.95908	3.12483	2.59166	3.01661	2.66996	2.87083	2.85965
ENSG00000173818	1.79397	1.30677	1.61767	1.85331	0.843386	1.78455	1.27379	0.752888	0.702832	1.48102	0.946643	0.716964	1.07871	1.07355	1.08661	2.96856	1.05651	1.23973	1.5131	1.33229	1.58658	0.774916	1.35297	1.44672	1.5184	1.47669	1.75145	1.04252	0.70995	0.955372	0.598118	1.6145	1.01815	0.930418	1.22368	1.25974	0.653195	1.25864	0.827504	1.00796	1.40216	0.487974	1.06536	0.61134	0.921856	0.831387	1.30899	2.09073	0.945346
ENSG00000185662	0.39623	0	0	0	0	0.197472	0	0	0	0	0	0.0405469	0.116832	0	0	0	0	0.156898	0	0	0.0489302	0	0	0	0	0	0	0	0	0	0	0.0951982	0.0381503	0	0.0534823	0.0505556	0	0	0	0	0	0	0	0	0	0	0	0.0812931	0.0385306
ENSG00000177324	0.0303591	0	0	0	0.00657442	0.0035554	0	0	0.0125177	0.0172321	0	0	0.0243576	0	0	0.00543584	0	0.0166322	0.00893213	0.0141444	0	0	0	0.0051835	0.00558489	0	0	0	0	0.00746872	0	0	0	0	0	0.00518357	0	0	0	0.00459264	0	0	0	0	0.00556562	0	0	0	0.0117754
ENSG00000149262	2.19146	1.23858	1.97709	1.32732	2.68929	2.44707	1.93432	2.77716	1.43343	1.81665	2.39183	2.3801	1.69603	1.91193	2.32554	2.76089	2.47734	1.82757	0.849008	2.06664	2.10743	1.84168	3.37376	2.41504	2.71388	1.87853	2.13297	1.4136	1.83781	2.22684	2.68245	2.53306	2.16383	1.79442	1.65821	2.13992	1.99442	2.16976	2.55458	2.10374	3.28669	1.87736	2.58285	2.40676	2.18112	1.97976	2.61284	1.95051	2.5982
ENSG00000143409	2.25028	1.57656	1.7709	3.03803	2.30544	3.21545	2.55538	2.67733	1.88598	1.5556	3.04735	2.60736	2.65113	1.97319	1.35794	2.79993	2.35496	2.91662	1.92977	2.56157	2.08986	1.60523	2.6291	1.80555	2.60738	2.20682	1.32999	2.00737	2.5533	1.77591	1.58595	1.96821	2.35075	2.40123	2.26827	2.15549	2.60143	3.14124	2.246	2.47453	2.41924	2.57399	1.8771	1.99884	2.89575	1.31659	1.86365	1.68925	2.38474
ENSG00000158125	2.27338	1.85977	3.3018	3.83619	2.61896	2.49364	0.954223	2.12455	2.81323	3.99363	2.2358	1.38085	0.739128	2.48323	1.57382	1.5226	1.95669	1.7124	1.40627	1.70941	3.37185	3.55482	0.319787	0.238425	1.29329	1.68013	0.904973	1.85149	1.24433	1.44691	0.931817	2.12274	1.41356	2.00033	1.84559	2.41551	1.40466	2.12087	2.22589	1.78312	2.16577	4.05366	1.80152	2.81068	2.21777	2.94568	2.17891	2.69549	3.16804
ENSG00000185614	3.89866	4.15888	3.42206	2.95702	3.56486	3.94289	3.36029	2.77602	1.81784	2.90354	3.65388	4.01101	2.91484	3.62716	3.86667	4.34976	3.00568	2.665	3.61054	3.70932	3.36441	3.68097	2.24195	3.64833	3.16548	2.90878	3.87711	2.77626	3.17821	2.80607	3.21365	2.66122	3.15157	2.70482	2.23937	2.76076	3.399	3.29667	2.54951	2.42723	3.38902	2.88725	2.61139	2.85064	2.60092	2.41256	2.89336	3.15651	2.30638
ENSG00000180776	3.61022	4.58896	4.61484	4.4644	4.67544	4.1019	4.82885	4.123	3.78888	3.1588	2.91106	4.27755	4.12396	3.04488	4.29842	2.66274	4.30433	4.42246	1.32392	3.51729	4.43409	3.6047	4.6316	4.53903	4.34078	3.96885	3.79699	3.7302	3.59479	3.53179	3.90162	3.53582	3.04226	4.14801	3.80418	4.03325	3.92969	4.12389	4.29341	3.94885	4.69725	4.54294	4.06966	3.351	4.15232	4.00792	4.13869	3.93971	4.4909
ENSG00000137494	1.01645	0.458463	0.485239	0.435055	0.439279	0.991776	0.878392	1.50702	0.542732	0.729395	1.2237	0.872831	1.04587	0.5947	0.887587	0.336776	1.10085	1.06913	0.26459	1.09401	1.47965	0.976092	0.92797	1.32864	1.17792	1.24648	0.765932	0.828354	1.10322	1.03475	1.33016	1.38506	1.24085	0.553307	0.834574	0.973141	0.636915	1.54966	1.45012	0.779734	0.651816	1.00145	1.30852	0.995763	1.18362	0.697721	0.689636	0.819292	1.22269
ENSG00000167703	2.35452	1.45442	1.74588	0.999345	2.21734	1.47172	2.9487	2.55185	2.76392	1.85154	3.32736	1.76384	1.57479	2.57899	2.20175	2.46437	1.35844	1.01724	1.31968	2.40921	1.53214	1.8012	1.62917	2.00659	1.41885	2.70758	1.69897	2.68882	2.23253	1.68879	2.37092	2.43871	1.57787	2.42358	2.79204	2.22046	2.30956	1.87548	2.62152	2.86587	1.69204	2.58776	1.81837	2.10379	2.94051	2.74938	1.98305	3.60236	3.12241
ENSG00000026036	0.312954	0.231475	0.137516	0.256874	0.204711	0.173916	0.460403	0.0821897	0.109013	0.525343	0.312894	0.236744	0.594256	0.278664	0.284159	0.0342165	0.220223	0.309868	0.0830133	0.20989	0.510235	0.465069	0.192371	0.352216	0.425657	0.54221	0.101973	0.476579	0.22833	0.440946	0.227439	0.631296	0.184123	0.352566	0.253209	0.204848	0.104245	0.362727	0.441526	0.148109	0.688329	0.244825	0.247673	0.243919	0.153979	0.103578	0.13302	0.18838	0.165532
ENSG00000186952	0.0618802	0.0125936	0.137825	0.0318115	0.0347253	0.0256619	0.0842655	0.0262972	0.012141	0.0249994	0.0421829	0.0140189	0.0716426	0.02069	0.0354898	0.0105245	0.0230409	0.203898	0	0.0340559	0.0072885	0.0181018	0.00578328	0.0879123	0.0532704	0.0345026	0.0455232	0.125516	0.00981048	0.0108518	0.0179246	0.0612878	0.0113071	0.0196233	0.0394527	0.00502719	0.0140649	0.055668	0.344548	0.0396	0.0706618	0.0227779	0.0190802	0.0254792	0.026789	0.0157652	0.0181043	0.038365	0.0152079
ENSG00000136819	4.01886	3.3705	3.36317	3.11719	3.83499	3.48436	4.08058	3.97265	2.96874	3.43611	3.85463	3.90755	3.54327	3.53172	3.65407	3.18395	4.03682	3.98997	4.19148	4.23013	4.20054	4.24564	4.03212	3.64147	3.52673	3.8108	4.37601	3.30618	3.7547	3.77429	3.4168	3.71067	3.78958	4.20204	3.87934	3.22752	2.91064	3.38103	3.50948	2.86804	4.03693	3.42827	3.99265	3.48374	3.46636	3.95639	3.17451	3.84551	3.73951
ENSG00000126549	0.334086	0.246387	0	0	2.86929	0.0448116	0.158735	1.25567	0	0.00736939	2.32747	0.143023	0.0929108	1.49558	0	0.0568908	0.319189	4.4869	0	0.0299761	0.0317601	0.045035	0.0126777	0.196272	0.261071	7.53928	0.0183602	0.0112563	0	0.0158693	0	0.188238	0	0.0706013	0.0116712	0.0219638	0	0.0124178	6.08389	0.00976925	0.52078	0	0.0209496	0.0258372	0.346886	0.013866	0.21357	0.0178748	0.0332091
ENSG00000183682	0.52317	0.724601	0.151666	0.969134	0.322327	0.121557	0.534791	0.483919	1.24442	0.473608	0.990186	0.130414	1.54259	0.676887	0.907531	0.258896	0.213169	0.477078	0.0718455	0.11237	0.180894	0.407328	1.14702	0.223661	0.775839	1.28473	0.219975	0.852696	0.222944	0.279014	0.277364	1.0336	0.199419	0.624623	1.80596	0.60674	0.635707	0.848356	0.377747	0.71183	0.601567	1.00412	1.24684	0.588343	1.01971	0.605629	0.71576	1.39362	0.762357
ENSG00000066117	4.01036	2.94662	3.5923	3.88375	4.07515	3.61235	4.40806	4.14824	2.93363	3.83161	4.02043	3.75025	4.42827	4.24158	4.20241	2.16452	3.18779	3.63475	2.21904	3.46385	4.01472	4.12432	4.07609	4.13612	3.92732	3.74706	3.83903	3.67442	3.24977	3.92143	3.69956	4.24252	4.67824	4.78213	3.8902	3.94481	4.40074	3.98186	3.89338	3.26412	4.01345	3.97808	3.97919	4.39878	3.96421	3.73773	3.9472	4.02368	3.93989
ENSG00000103222	3.14247	1.83432	2.4939	3.93582	3.84865	3.73166	5.83487	5.24584	4.56713	4.1294	5.13437	3.88385	3.70738	3.72838	4.16508	3.71423	4.16041	3.56226	3.86363	3.54013	3.56585	3.90358	7.64952	4.58567	4.18977	4.56932	5.34636	3.93177	4.09952	3.80749	4.57391	5.82791	4.10901	4.05614	4.81449	4.83847	3.6121	4.39129	4.89533	4.4994	4.6857	3.95552	5.39033	4.04757	4.27348	3.31746	3.99942	4.44732	3.9911
ENSG00000115415	5.76724	4.82362	5.52213	3.85563	7.22116	7.17599	5.97325	6.25332	5.22603	6.45729	4.65939	4.42434	5.23459	6.0024	7.54901	3.75567	6.05438	6.7181	4.65493	6.46894	7.55938	6.79373	5.65625	6.73086	5.624	5.22325	3.39465	4.8786	5.47715	5.95323	6.19134	6.94976	4.68929	3.72512	6.17682	5.13049	7.64871	5.29057	6.60267	5.7692	5.87267	6.69126	4.68478	4.57978	6.51198	7.54701	6.5699	6.59171	8.02128
ENSG00000145192	0	0.314393	0.502097	0.0386935	0.0384401	0	0	0.0267152	0	0.0732651	0.0403641	0	0.047614	0.0823008	0.0789264	0.264066	0.145771	0.136217	0.0520215	0.133668	0.00986508	0	0.0349015	0.399659	0.418263	0.151422	0.627453	0.0104127	0	0	0.0480594	0.250887	0.0152969	0.0133212	0.506553	0.261366	0.22963	0	0.0939106	0.308907	0.231448	0	0.191602	0.115772	0	0.0506398	0.299773	0.483112	0.00774596
ENSG00000137496	2.25557	0.589055	1.40002	0.710364	3.44902	1.53752	1.59824	1.8347	2.03788	1.37895	1.15309	1.53493	2.53156	1.7504	1.80633	0.313766	1.43798	1.43285	0.512319	2.52497	1.40841	2.23842	1.3608	2.14805	1.5674	2.56701	1.03621	1.25808	1.00089	1.42295	1.58073	2.64053	1.02136	0.627887	2.72454	1.15809	2.03909	1.5106	3.01831	2.08714	1.57967	1.5076	1.30598	1.0091	2.48275	2.92442	1.65899	1.95385	2.95825
ENSG00000105227	1.59346	0.152458	0.265877	0.870369	0.534104	0.256322	1.10901	0.341304	0.418275	1.11577	0.912816	0.702084	0.555855	0.942733	0.66244	0.706055	0.197647	0.594236	0.574704	0.891858	0.903541	0.724253	1.01607	0.718428	0.685392	1.04865	0.249106	1.0639	0.421626	0.636965	0.33639	0.938193	0.451544	0.794318	0.681469	0.585625	0.320881	1.50901	0.620936	0.493266	0.446087	0.776097	0.728374	0.571793	1.11674	0.424957	0.466921	0.823021	0.703287
ENSG00000266086	0	0.0556227	0	0.0426259	0	0.0457008	0	0	0	0	0.0334756	0	0	0	0	0.0350882	0.0385296	0.0359158	0	0	0.0323932	0.0345828	0.0384537	0.0334752	0.071202	0	0.05547	0.0341765	0.0434722	0	0.0398758	0.0633637	0	0	0	0	0	0	0.0317606	0	0	0.0278027	0	0	0	0.0420231	0	0	0
ENSG00000125813	0.310344	0.41073	0	0.348355	0.354487	0.0223795	5.75799	0.117863	0.123957	0.307904	0.0564575	0.603561	3.13433	0.482474	0.0194301	0.159108	3.36297	2.77151	0.00707855	0.417403	0.281052	0.0418889	0.0737984	6.56394	5.7657	0.0212302	0.00685086	0.0413979	0.0474455	0.0176823	0.0339659	0.284624	0.0184224	0.00536829	0.168346	0.206563	0.114596	0.226847	0.133969	0.142128	0.0377701	0.167192	0.0689117	0.0569924	0.337152	0.0357989	0.0184787	0.009992	0.064102
ENSG00000123815	3.28618	2.10175	2.13956	2.70241	3.10994	2.42431	3.38711	2.13762	1.84766	3.04954	3.29076	2.36707	2.83895	2.09636	2.03919	2.52418	2.65982	3.07323	2.02494	2.16875	2.54071	2.51862	2.69296	3.17795	2.85268	2.27598	2.01321	2.71285	2.15445	2.35681	2.03971	2.99907	1.52754	2.73199	2.38378	2.18078	2.39953	2.20023	2.83174	2.42485	2.49534	1.97613	1.68893	1.91929	2.09174	2.01586	2.27823	1.78838	1.83647
ENSG00000158545	2.77122	1.61439	1.83644	2.01869	2.86526	2.65294	2.68542	3.24884	2.25939	3.12452	2.77362	2.75071	3.28123	2.73546	3.3359	1.88126	3.40477	2.46575	1.06045	2.68142	3.12426	2.63271	3.2795	2.53601	2.85913	2.70121	2.59921	2.87197	2.93211	2.69036	2.62483	2.89738	2.74645	2.81191	2.90322	2.5962	2.4902	3.247	3.13683	2.49873	3.00747	2.30878	2.88651	2.65259	2.88225	2.88575	2.72352	2.7775	3.04579
ENSG00000103199	1.72721	0.688578	0.666013	1.47894	1.63831	1.25764	1.94642	1.69207	0.906927	1.60365	1.13782	1.59851	1.85986	1.14686	1.66793	0.991508	1.63575	1.18073	1.06443	1.27102	1.20856	1.22119	2.04551	1.48379	1.66064	1.39451	1.04598	1.32503	1.20499	1.06403	1.3225	1.81083	0.90079	1.09839	1.35212	1.16797	0.864866	1.66341	1.81012	1.01922	1.75816	1.15735	1.45177	1.8525	1.15045	1.29263	1.40896	1.23979	1.3247
ENSG00000103197	2.72141	1.59539	1.86037	2.94207	2.94518	2.37184	4.94388	3.24545	2.51478	3.07555	2.55487	3.00179	3.84624	2.93416	3.11709	2.14722	3.03813	2.80435	2.07505	2.5789	2.68341	2.36518	2.87098	5.1127	4.01753	3.05358	1.85251	2.76736	2.9519	2.57799	2.73516	3.09512	2.91702	3.0037	2.97794	2.85965	2.37564	3.43186	3.22748	2.93344	3.31496	2.6369	3.09761	3.09333	3.13201	2.24246	2.97778	2.85085	2.98005
ENSG00000162598	0	0	0	0.0138453	0	0	0	0.00477473	0.0131235	0.00363107	0.00543512	0	0.00428674	0	0.00860782	0	0	0.00583546	0.00936501	0	0.0104964	0	0	0	0	0	0	0	0	0.00783087	0.00648633	0.0309118	0.00408568	0	0	0.00543512	0	0	1.0118	0	0.00459905	0	0.010347	0.00852717	0	0	0	0.00882359	0
ENSG00000115138	1.26938	0.513015	0.757926	0.187294	1.42224	0.392261	0.292067	0.495541	0.61751	0.120281	0.441612	0.684495	0.661562	0.344193	0.119063	0.639402	3.23779	4.07751	0.79098	1.16838	0.197818	0.109037	0.886866	3.07986	0.261588	0.337271	3.94711	0.077804	0.0202596	0.149962	0.0369064	0.195719	0.636421	0.0403788	1.08048	0.464485	0.1395	0.411669	0.342033	0.717274	2.29053	0.124266	0.307999	0.117989	0.420027	0.467366	0.746074	0.276988	0.328062
ENSG00000067365	1.4134	1.80688	2.0429	1.84639	1.3533	0.993582	1.28754	1.04035	0.858119	1.71798	1.4419	1.05518	1.3257	0.98071	1.16604	1.49981	1.43527	1.07546	1.95026	1.13094	0.795316	1.14541	1.92923	1.39939	1.43158	1.12749	1.14104	1.56744	1.261	1.41569	1.38283	1.60782	1.07873	1.02617	1.12992	0.890124	0.917708	1.37462	1.21241	1.00738	1.31212	0.88737	1.23835	1.39378	0.915292	0.923106	1.04954	1.13834	0.969127
ENSG00000143093	2.30746	1.56633	2.01187	2.50382	2.33225	2.44484	2.76729	2.6703	2.33649	2.42488	2.33889	2.3756	2.2737	2.6521	3.05741	1.39295	2.75057	2.68512	2.1181	2.47859	2.17707	2.58603	2.46313	2.75303	2.4833	2.59106	1.69951	2.81017	2.21928	1.75279	2.04627	2.26088	2.60927	2.51164	2.26185	2.41148	2.72443	2.24741	2.75113	2.57266	2.9085	2.84997	2.66204	2.76086	2.33119	2.68566	2.36674	2.63291	2.84233
ENSG00000232382	0	0	0	0	0	0	0	0	0	0	0	0	0.0172026	0	0	0	0	0	0	0	0	0	0	0	0	0	0	0	0	0	0	0	0	0	0	0	0	0	0	0	0	0	0	0	0	0	0	0	0
ENSG00000167962	3.56812	2.69761	3.01904	4.13857	3.64408	3.91967	3.9507	4.78444	3.73403	4.34175	4.10974	4.3228	4.70428	4.44163	4.38847	3.07655	4.47999	2.8138	4.37589	3.83347	4.46669	4.73597	4.48936	3.47537	3.33816	3.72698	2.93466	4.25408	4.93773	4.278	4.64651	4.31312	4.37422	4.73949	3.54478	4.20336	3.57343	4.4409	4.32222	3.34236	4.3483	3.91701	4.79831	4.89717	4.03421	3.47691	3.77979	4.0512	3.98101
ENSG00000204390	0.763604	0.386922	0.486871	0.408005	0.779019	0.227623	1.08505	1.01018	0.397996	0.897572	0.663489	0.923457	0.820101	0.707942	0.48055	0.38156	0.655268	1.17249	0.125069	0.868746	0.498257	0.399092	0.773702	0.693056	0.659665	0.574374	0.513233	0.416827	0.39653	0.142826	0.637944	0.271485	0.696993	0.639408	0.874774	0.505778	0.412983	0.690379	1.05828	0.811894	0.921085	0.353153	0.459784	0.744099	0.625256	0.999654	0.31415	0.741405	0.332193
ENSG00000167705	2.84592	3.07305	2.35683	2.11281	2.24989	1.95736	1.93869	2.21588	1.64747	1.44755	3.03954	1.66996	1.40361	2.42438	2.08199	2.99551	2.27601	0.882613	2.47509	2.141	1.61233	1.88054	1.89589	1.96816	1.40631	2.10496	1.9982	1.76166	1.84223	1.90561	1.4359	1.32792	1.35748	1.63067	2.15792	1.25635	1.21973	1.41827	1.66327	2.20369	1.15615	1.77993	1.22148	1.28671	1.81319	1.56002	1.6437	1.74597	2.31485
ENSG00000166862	0	0.00623959	0	0	0	0	0.0102591	0	0	0.0393513	0.0222342	0.00595702	0.0520454	0	0	0	0	0.0395531	0	0	0	0	0	0.00744945	0.0318388	0	0.0610461	0	0	0.0107299	0.00888916	0.0422315	0.033284	0	0.00788766	0.0148608	0.00697033	0.00839298	0.00706463	0	0.0312494	0	0.00710389	0.00585331	0.0159522	0	0	0.00605698	0
ENSG00000168970	0.333726	0.155429	0.189653	1.01023	0.303771	0.0776552	0.551202	0.157824	0.244923	0.641429	0.421879	0.311429	1.19773	0.373795	0.374287	0.0349074	0.499447	0.747886	0.492198	0.550777	0.308255	0.477913	1.02211	0.241927	0.620673	1.00864	0.99205	0.86008	1.40988	0.473818	1.328	1.50351	0.507018	0.557746	0.546827	0.792785	0.45564	1.27429	1.00033	0.400202	1.25049	0.223017	0.680965	0.616812	0.392121	0.114849	0.312575	0.393963	0.291557
ENSG00000170683	0.128217	0.03751	0.0280627	0	0.0564769	0	0	0	0	0	0.0880384	0	0	0	0	0	0	0.0479349	0	0	0	0	0	0	0.0715621	0	0	0.111461	0.0861038	0.0640107	0.1045	0.0215422	0.0169523	0	0.0238354	0.0446907	0.0210769	0.0502692	0	0.0396573	0.0378946	0.0911204	0.0214787	0.0524998	0	0	0.0404782	0	0.0171225
ENSG00000074657	2.16151	1.42989	1.01569	1.77212	3.29287	2.18828	3.60684	3.30246	2.15561	2.17691	2.02937	1.78429	2.68245	1.97242	3.62311	1.88272	2.52444	3.4913	1.28318	2.07551	2.122	2.48131	2.5164	3.2267	3.18483	3.32417	1.83963	3.32366	1.76961	1.61456	3.15186	2.83856	2.54794	1.49148	3.15653	2.83946	2.40344	3.14942	3.09092	2.58269	3.73613	2.32014	2.73424	3.15518	2.95284	3.37124	2.59448	2.73431	3.14567
ENSG00000137868	1.5944	1.94935	0.385413	1.42231	2.75443	1.08126	2.01748	0.714143	1.29398	0.867533	2.23484	0.693808	1.53575	0.880688	0.960752	1.22555	0.425291	1.19461	0.191948	2.2403	0.0766767	0.320752	0.344523	1.82614	0.868366	3.0961	0.636442	3.98196	0.680277	1.19105	0.754166	1.32232	0.11526	1.49684	2.39667	0.839988	1.60147	2.93425	1.76363	1.94316	1.50387	0.952717	0.954175	0.539408	1.06564	0.242564	3.73654	0.291614	0.928048
ENSG00000140937	2.85639	2.47195	1.12159	0.879468	1.45307	1.15456	1.36265	2.02258	2.66358	2.152	0.657655	1.10128	3.57205	2.42217	3.35133	2.36002	0.486717	2.14606	1.13103	1.86767	0.692916	2.38382	5.08536	0.862544	2.1101	3.58278	2.67492	2.63393	1.45891	1.87475	0.702145	2.76901	0.886099	1.51085	4.4607	2.10908	1.5726	3.24632	1.48731	4.43008	1.30133	3.38214	2.54227	2.52692	4.62512	2.05052	1.53928	2.18004	3.41514
ENSG00000074370	2.64228	0.810762	0.824532	1.273	2.53971	2.24075	3.63445	2.80328	1.56557	1.03848	2.16335	4.01857	2.37156	2.10988	1.76691	1.14987	2.09587	2.94835	1.6599	2.6589	2.32004	1.33999	2.16442	2.89874	3.02204	4.14579	0.558806	1.50069	2.84047	0.830765	1.05336	3.27796	0.852775	1.16637	2.51553	2.82574	1.90863	1.68399	3.24892	2.39324	1.75796	1.77929	2.73425	2.81111	4.00449	1.78197	1.47984	1.3947	2.19878
ENSG00000160224	0.0449115	0.00430311	0	0	0.00651693	0	0.673658	0	0.0287888	0	0.00513822	0.00410811	0.428666	0.00708263	0	0.0107565	0.00592277	1.4679	0.0176542	0.0416609	0.0197801	0.0106003	0.0176607	1.80042	0.137453	0.0949558	0.00856945	0	0.00669226	0.0147691	0.00613212	0.0098117	0.00771448	0.00671583	0.0108609	0.02551	0.00480744	0.0115559	0.0337671	0.0315696	0.0216089	0.0127435	0.0291512	0.0160789	0.0219423	0	0.023091	0.00834212	0.0077922
ENSG00000145194	1.87192	2.51004	2.57732	1.89293	2.30368	2.26458	1.5077	3.13668	1.52247	1.75605	2.83423	2.03805	3.10899	2.35264	1.57876	3.56251	2.84748	1.73814	2.29108	1.69211	2.24954	1.55595	2.1202	1.88064	2.09308	1.402	2.97394	1.70168	2.12416	2.07901	2.13353	2.76822	1.54491	2.41164	1.37084	1.71702	1.70769	1.9792	1.60458	2.134	2.89006	1.42606	2.16995	2.5403	1.25183	1.72513	2.29632	2.44157	2.06897
ENSG00000135973	0.0534235	0	0.0228223	0.0233443	0.0231907	0	0.0251755	0.0160911	0.0294335	0.0483818	0	0	0.0144524	0	0	0	0	0.0956725	0	0.143868	0	0	0	0	0.0197172	0	0	0	0	0	0.0218288	0.0175121	0.0274232	0.0238943	0	0.0183068	0	0.0409405	0.0173643	0.0481471	0.0308378	0.0302235	0.0174604	0.0286492	0.0196495	0.023012	0	0.0442318	0.0413495
ENSG00000111727	1.49007	2.5961	2.06085	1.42445	1.60499	1.54799	1.80322	1.26714	1.26545	1.40253	1.24797	0.991833	1.41624	1.13073	1.42436	0.627903	1.77434	1.66562	1.07124	1.60268	1.58378	1.47121	1.50174	1.82802	1.52875	1.93009	1.26739	1.56331	1.22597	1.43409	1.48264	1.94102	1.79494	1.50433	1.70253	1.48487	2.0806	2.25446	1.61617	2.00133	1.67397	1.40401	1.66498	1.61216	1.7384	1.73424	1.55532	1.38413	1.71775
ENSG00000196757	1.82085	3.04735	1.93567	2.42789	1.43157	1.03905	1.62601	1.5068	0.854076	1.34355	1.52646	1.20805	1.7309	0.943023	1.6159	0.625946	2.39075	2.59282	0.760551	2.04426	2.13437	1.61262	2.22482	1.65179	1.89961	1.80452	2.59009	1.75603	1.63699	1.25401	1.63565	2.01757	1.46507	1.50994	1.71805	1.07129	1.4396	1.72291	1.56781	1.17389	2.41429	1.07926	1.5939	1.65457	1.77369	1.30389	1.46948	1.55842	1.20972
ENSG00000140931	5.36192	3.74808	5.12946	3.701	3.6627	3.60615	2.80758	2.92153	3.56792	4.10428	2.97644	3.52374	3.77929	3.83406	4.15038	4.13497	1.65431	2.86022	2.81297	3.75885	3.29425	2.53446	4.16519	2.71291	2.88582	4.5924	2.32454	3.18914	3.50887	2.85133	2.01309	3.26743	2.66463	3.05568	4.92115	2.75074	2.35254	3.53502	2.78432	4.30163	2.62819	3.6963	3.56039	3.42633	4.00197	3.44354	3.18643	3.19816	4.63349
ENSG00000151498	1.78954	1.27732	1.95885	1.69372	1.0259	1.47004	2.22804	1.28723	0.86878	1.4117	1.83626	1.13951	1.53253	1.01242	1.59698	0.678284	1.59323	1.7456	0.750536	1.91706	1.92327	1.80859	1.97998	1.88613	2.06312	1.91017	1.84289	1.37792	1.60715	0.950578	1.42394	2.33229	1.47122	1.11861	1.25971	0.731824	0.98032	1.82299	1.90979	1.42314	1.31605	2.26623	1.54101	1.68616	1.79633	0.852442	1.6293	1.18665	1.4575
ENSG00000109705	2.13664	0.130652	0.0630079	0.0538885	0.17446	0.182437	0.178142	0.094961	0.212496	0.222921	0.170098	0.0671222	1.09234	0.26961	0.154934	0.986336	0.0196891	1.26381	0.0723208	0.493402	0.326093	0	1.09642	0.162435	0.634323	0.819154	0.0700447	0.101678	0.0549541	0.0959111	0.0304655	0.655859	0.0507705	0.0442829	1.87299	0.0423558	0.100936	0.915685	0.048098	0.91188	0.467899	0.61677	0.471293	0.201309	0.508249	0.435758	0.710108	0.746707	0.511076
ENSG00000175538	0.856995	1.64182	1.53821	0.732066	1.62262	0.515419	1.35151	1.53689	0.940698	0.388601	1.99194	0.771832	2.28137	0.787676	0.71415	1.01006	0.861127	1.62581	0.349499	0.844128	0.189672	0.253791	1.99177	0.605968	1.42627	2.15264	1.81719	0.450162	0.340489	0.436646	0.148455	1.41986	0.222952	0.980774	1.87303	0.571136	0.53618	0.922389	2.19023	1.52091	0.774306	0.73636	0.751749	1.31821	1.60057	0.80155	0.658871	0.948301	1.81771
ENSG00000188909	0	0	0	0	0	0	0	0	0	0	0	0	0.0670357	0	0	0	0	0.175761	0	0	0	0	0	0	0	0	0.0476469	0	0	0	0	0.0274809	0	0	0	0	0	0	0.0272497	0.0505033	0.0482665	0	0.0542895	0.0226044	0	0	0	0	0.0218521
ENSG00000167555	0.794186	1.39776	1.30354	1.43811	0.184674	0.129472	1.54353	1.47619	0.257982	0.0149997	0.877716	0.867227	0.480181	0.329298	0.616919	0.708496	1.08799	0.184689	0.0805123	0.711361	1.44587	0.0543923	1.19402	0.129507	0.198612	1.0509	0.990377	1.21709	0.182874	0.113466	0.0723003	0.614881	1.00721	1.51358	0.586351	0.260177	0.187919	1.5365	0.788514	0.713325	0.4654	0.618452	0.554133	0.841036	0.705187	1.19594	1.0164	0.214878	0.34683
ENSG00000103226	0.211532	0.260146	0.0144624	0.721906	0.768863	0.739237	0.864188	1.08147	0.853958	0.493737	0.811015	0.0184888	0.754499	0.14863	0.605325	0.00304893	0.12834	0.735521	0.0100079	0.41283	0.0195723	0.275675	1.11454	0.71144	0.611846	0.390904	0.186629	0.212405	0.57938	0.158793	0.355421	1.58984	0.62821	0.89939	0.744193	0.120008	0.440072	0.18159	0.874961	1.07212	1.07552	0.971919	1.32319	0.749466	1.0391	0.0714839	0.87767	0.726049	0.865637
ENSG00000117650	2.40852	4.66259	3.8378	3.05944	3.62434	2.79432	3.81442	3.65258	1.52392	2.75566	2.26684	2.9772	5.32684	2.51689	2.68467	2.01333	4.31125	4.85357	1.47845	1.60966	3.14239	2.07961	3.50392	3.2453	4.08482	2.93657	3.19649	2.47646	1.50651	2.18459	1.58605	3.19434	3.22638	3.45391	2.49351	2.62566	2.17678	1.929	1.90335	2.95329	3.29612	2.16132	2.25836	2.14739	1.95966	3.84219	3.52855	2.3548	2.68326
ENSG00000164932	7.12016	7.2057	3.75457	4.85656	4.75664	3.15562	3.87835	2.7126	4.46443	4.51953	2.78895	2.91642	6.23585	4.72429	3.91177	6.71535	2.39761	6.01271	1.71648	4.65717	4.12473	2.7897	6.47845	4.67667	5.56161	6.41923	3.75057	7.1472	4.26018	5.19217	2.07341	4.33029	2.70685	3.65415	6.82171	3.47771	3.23612	5.02609	2.14174	6.58925	3.35583	5.30739	5.29145	3.87168	5.5172	4.96715	4.22794	5.03033	5.7319
ENSG00000169564	6.17698	6.06395	7.19604	6.7634	7.2035	7.0832	6.94737	7.46627	7.31016	6.87939	7.12327	7.0254	7.47943	7.16465	6.87833	3.38161	7.34135	7.2042	5.72121	6.55763	6.68596	6.94871	7.82727	6.79074	7.23995	6.83626	6.87351	7.08829	7.11568	7.18012	6.77748	6.67289	6.9259	6.3656	6.9762	6.74249	7.29101	7.11754	7.37093	6.98148	6.87724	7.01255	6.97972	7.36621	6.9228	6.74984	6.90836	7.01942	6.99673
ENSG00000070269	1.61222	1.31491	2.05773	0.765122	1.46713	0.645049	2.08463	2.20474	0.880088	1.62963	1.33748	1.41044	1.32314	0.722359	2.04689	1.29525	1.82369	1.74028	0.424688	1.4038	1.52253	1.10507	1.33174	1.90226	2.38211	1.45087	3.19486	1.83346	1.3094	1.18986	1.1352	1.3679	1.27078	1.26942	1.54446	1.18979	1.58537	1.46622	1.60766	1.35384	1.29844	1.1346	1.0288	1.96941	1.15805	1.5601	1.14717	2.03683	1.31337
ENSG00000165632	1.76919	1.23146	1.21256	1.17374	2.1501	1.36239	2.56002	2.48092	1.36351	1.53869	2.3507	1.51142	1.98852	1.62917	1.50103	1.7425	2.4021	2.5085	1.29866	1.61493	2.29191	1.97379	2.2404	2.19533	2.17806	2.03141	1.39208	1.52188	2.07225	1.64804	1.56514	1.93016	1.7286	1.89855	1.85571	1.75157	1.53949	1.78408	2.21052	1.767	2.11816	1.67199	1.6949	2.28431	1.94526	1.97249	1.94039	1.76312	2.37175
ENSG00000251493	2.48119	1.33223	2.59365	2.37561	2.46562	1.69968	2.06437	0.185447	2.93594	2.56645	0.978939	0.625463	0.892628	2.53027	2.20707	1.64255	1.4449	2.69995	2.40912	1.36729	0.950615	3.07701	1.46774	1.20397	2.01835	1.751	2.34533	3.18792	0.614406	2.81184	1.81605	2.31822	1.48068	0.169053	1.48794	1.6534	1.02084	1.55393	1.96726	0.494691	0.887625	1.89037	1.90004	0.0602675	1.88673	1.78815	1.7477	2.0913	1.49265
ENSG00000131480	0.375081	0.137406	0.229657	0.21473	0.173176	0.413136	0.131263	0.107341	0.0989208	0.651124	0.448204	0.144611	0.10338	0.372508	0.377166	0.0282355	0.325962	0.273942	0.119965	0.249917	0.396126	0.333058	1.0292	0.162663	0.148354	0.163216	0.323933	0.190459	0.503337	0.148867	0.173115	1.15802	0.349087	0.812109	0.340377	0.434858	0.129648	0.42204	0.315232	0.236417	0.239609	0.149709	0.302866	0.368542	0.156624	0.231435	0.247906	0.362757	0.257579
ENSG00000109323	2.81912	2.59929	3.17358	2.44763	2.86209	1.54409	1.60009	2.87238	1.88801	2.69864	2.16215	2.2096	2.31667	2.49539	2.68607	2.85034	1.83341	2.06791	0.747814	1.88409	2.50847	2.17912	2.14004	2.21718	2.42149	2.35282	2.00096	2.28889	2.06481	2.12257	2.90634	3.00645	2.15041	3.07422	2.46215	1.41344	2.00199	2.11244	1.67143	2.37035	1.9398	2.63906	2.87646	2.17789	1.913	2.91424	2.23321	2.74642	2.69703
ENSG00000108602	4.24474	0.56357	1.84628	2.47371	4.28566	4.26756	5.99956	6.43008	1.93839	1.14511	7.37779	5.79961	1.63964	2.59914	1.47318	4.46136	7.52869	3.18025	3.95232	4.47088	6.03072	3.85122	6.0179	5.42379	6.79323	2.85155	9.1102	0.529795	3.19893	2.22258	3.66817	6.04233	2.76279	4.02415	4.50225	5.86661	0.979958	2.50371	4.3365	3.66396	4.99374	1.02475	3.92987	3.13936	2.64528	0.990525	3.38555	1.99805	0.932449
ENSG00000171159	6.08814	5.42843	4.74311	4.7392	4.53041	4.9034	3.63308	5.30057	4.81961	4.63864	5.47749	4.97801	3.98237	4.6053	4.00847	6.2399	4.52211	4.19948	6.12207	5.02731	4.89123	4.94909	4.83187	3.89028	3.9891	4.7042	6.16383	4.12341	4.36027	5.03374	4.19474	4.42848	4.17838	5.4324	4.66351	4.57814	3.22818	3.82864	4.32857	4.01501	4.88437	4.42643	4.49777	3.97631	3.92318	3.24361	4.75361	4.65197	3.94677
ENSG00000149575	0.128417	0.0308118	0.0754044	0.0209655	0	0.0446349	0.0169918	0.111723	0.18154	0.546926	0.0487637	0.165241	0.127771	0.0722721	0.332168	0.175295	0.014226	0.0307373	0.50102	0.419206	0.180169	0.130593	0.023586	0.0407495	0.0610422	0.285116	0.00688488	0.899919	0.205475	0.0118708	0.417032	0.364764	0.540214	0.0107698	0.422001	0.253317	0.0192045	0.38239	0.0651308	0.562762	0.0582454	0.158801	0.278656	0.0789425	0.571504	0.448174	0.492404	0.0495232	0.26046
ENSG00000213145	1.56769	1.09104	2.52693	0.228474	1.43994	0.398015	1.97636	0.574949	0.970409	0.552251	1.27333	1.45379	1.012	1.27349	0.501117	1.79303	0.762967	0.801459	1.46545	1.59565	1.51178	0.748679	0.479401	1.62391	1.62161	1.90601	0.265283	0.326281	0.838136	1.12538	0.558847	0.692987	1.70078	1.51708	1.6047	0.971196	1.24093	1.00487	1.05843	1.11512	0.945695	0.316102	0.93794	0.534388	1.16386	0.890734	1.08664	1.70959	0.574698
ENSG00000132128	3.46361	3.30951	2.9068	3.86162	3.73655	3.63925	2.7168	4.20377	3.21429	3.62789	4.04675	3.88102	3.68781	3.71116	3.43498	2.8426	3.44766	3.35472	2.34362	3.23888	4.38987	3.32272	3.86678	3.35029	3.39926	3.82325	2.81483	3.47924	4.36454	3.17547	3.12423	4.62544	3.2184	3.81812	3.58349	3.91123	3.33588	3.77717	3.49896	3.37885	3.99956	4.15712	3.61456	3.86689	3.16078	3.66997	3.72335	3.23615	3.36617
ENSG00000196954	3.70198	3.49866	4.83611	3.05291	3.35136	4.53284	2.28722	2.71455	3.58904	3.09746	3.21926	3.06876	2.36996	3.12005	3.2739	0.717309	2.5662	2.95384	2.46481	3.96007	3.91158	4.50655	2.41923	2.58568	1.46071	2.87655	3.24791	2.71783	3.65095	3.71625	3.73573	3.10143	3.48884	2.54748	2.72143	4.81611	3.84303	3.74439	3.72639	3.46084	1.28684	4.0017	3.9098	2.96232	3.9553	2.59923	2.97587	2.9518	4.07199
ENSG00000205078	2.35113	1.07096	0.361536	0.249174	1.12084	0.490248	0.353238	0.72082	0.463585	1.08997	0.474139	0.578474	1.08492	0.844613	1.43391	1.31703	1.64838	0.365292	0.780424	0.451274	1.08142	0.384107	0.837846	1.47738	1.29029	0.743705	0.534124	0.439601	1.1417	1.59076	0.700164	1.25444	0.288987	0.33707	0.423303	0.280564	0.218065	0.33005	0.518581	0.501793	0.679454	0.249823	0.45522	0.337316	0.299271	0.558757	0.21132	0.360075	0.574127
ENSG00000186184	4.11076	4.31454	4.94207	4.98528	4.02579	3.98576	3.06948	3.47346	3.66701	4.02443	3.99831	4.80806	4.14333	3.54705	3.80339	4.38988	3.85614	3.79918	3.85041	4.19209	3.21759	4.42034	4.20634	4.51294	4.53089	3.53721	4.15519	3.40027	4.04183	4.63628	3.93372	3.78677	3.28486	4.71284	3.9229	3.39517	3.45054	3.14411	3.69587	3.34789	3.98308	3.96639	3.80928	3.33664	3.37438	3.68627	4.28206	3.93534	3.91429
ENSG00000132749	1.30004	0.369907	0.904397	0.286066	0.796663	0.425746	0.329281	1.03421	0.112128	1.08634	1.0134	1.0798	2.47371	0.516228	0.268018	0.718263	0.595864	1.04697	0.357737	0.340615	0.398681	0.541423	0.799784	1.01134	1.18095	0.18762	0.88042	0.518496	0.128585	0.519282	0.401752	0.829564	0.244762	0.422796	0.214868	0.333868	0.201516	0.203599	0.914184	0.119262	0.479798	0.377234	0.775759	0.775946	0.244111	0.782866	1.68492	0.555551	0.617519
ENSG00000128482	0.531604	0.0273406	0.163288	0.445685	0.112621	0.0961609	0.105142	0.0286684	0.0211286	0.845115	0.0518065	0.0819442	0.216788	0.203259	0.300855	0.229652	0.0375194	0.0349733	0.191487	0.292988	0.0190079	0.0795371	0.463254	0.0770275	0.0557486	0.32598	0.33281	0.147102	0.0170831	0.0559475	0.0840888	1.1811	0.0439121	0.0508298	0.219776	0.107948	0.0365432	0.213718	0.0370325	0.0739977	0.278146	0.0163036	0.126327	0.040839	0.0892281	0.529152	0.168645	0.103374	0.313599
ENSG00000132341	6.23949	8.09773	7.65183	6.75573	6.49109	6.89296	5.71893	6.21238	5.68023	6.00727	6.44115	5.55312	7.18389	6.36367	6.40949	6.01208	6.70433	6.20461	5.45385	6.15322	6.55095	6.56491	5.71566	6.19757	6.46609	5.47507	6.59127	6.42399	6.63494	6.91217	6.41622	6.72701	7.01212	6.21719	5.34468	6.44711	6.96831	6.13154	6.01536	6.29203	6.18286	6.15289	6.18731	6.78536	5.65208	6.44195	6.87441	6.18972	6.32463
ENSG00000162976	3.14142	4.05271	4.68711	2.7336	3.65532	2.93711	2.07934	3.53362	2.32432	2.64295	3.15997	3.61083	2.39109	3.01683	2.78605	2.91311	2.78752	2.29267	1.36157	3.42486	3.16389	2.58049	2.50082	2.4315	2.71839	3.81883	3.65968	3.13982	2.44004	2.95804	2.80729	2.56347	3.59783	2.65005	3.21563	2.6258	2.90683	2.84825	2.97181	3.38264	2.26807	3.78861	2.3223	3.62507	3.24084	2.90035	3.166	3.96856	3.20976
ENSG00000221988	2.58642	2.18602	2.44291	1.38401	1.34165	1.93119	1.50143	2.91396	1.59256	2.44421	2.31932	2.3739	1.86067	2.91879	1.91887	1.73979	1.79671	2.13203	2.75694	2.70752	2.16047	1.85936	2.21574	1.0318	1.49096	2.06303	1.76481	1.41664	2.80885	2.05371	2.87252	2.09184	2.18689	1.57999	1.87549	2.09615	1.13769	2.09405	1.39269	2.1472	2.05324	2.46524	2.85299	1.98233	1.9843	1.98521	1.41335	2.07735	1.96497
ENSG00000268434	0	0	0	0.0698955	0	0	0	0	0.0224465	0	0	0	0.106474	0	0	0	0.0319642	0.0297912	0.138258	0.21357	0.0791354	0.0843935	0	0.0550013	0.0591823	0	0	0	0.0712699	0	0.0330835	0	0.02091	0.0362008	0.0293838	0	0	0	0	0	0.0235202	0.0230505	0	0	0	0	0.0251323	0.0226029	0.0419347
ENSG00000092621	3.12323	2.43348	4.78934	2.84506	5.03723	1.19167	4.90054	1.56727	2.54291	4.01696	2.79135	2.21038	5.57122	2.83644	3.80936	4.25379	1.95177	4.51513	1.66999	3.37088	0.858139	0.251237	5.90066	5.1909	5.08442	3.13948	3.31653	2.04887	2.20464	2.20038	1.4636	3.16457	0.883949	4.90399	2.96816	3.49658	1.12641	1.56756	3.24257	3.27084	4.51581	2.64475	2.0806	2.2798	1.89507	4.03071	3.7747	1.4153	3.50219
ENSG00000008300	0.708767	0.375339	0.388966	0.286608	0.41942	0.117626	1.46707	1.98925	0.366624	0.788896	0.860527	0.137506	0.228581	0.527497	1.70166	0.478889	1.42291	1.20949	0.267154	0.718484	0.692096	1.17125	0.739894	1.8542	0.852064	1.18672	0.839555	2.1884	1.18464	0.0755744	1.68602	0.813168	0.461482	1.10863	0.233666	0.688113	0.552958	0.580055	0.67709	0.0937506	2.77373	0.0824813	0.307379	0.522548	0.639806	0.0869284	0.211354	0.301821	0.346181
ENSG00000268750	0	0.148624	0.14781	0.243617	0.196846	0.0141724	0.284947	0.325345	0.20299	0.0939711	0.157311	0.0807237	0.155148	0.162446	0.424906	0	0.22162	0.26427	0	0.055776	0.416104	0.142976	0.22121	0.315927	0.208117	0.137311	0.0342808	0.179325	0.0790189	0.029652	0.118974	0.671015	0.105333	0.37998	0.332567	0.428272	0.130016	0.333056	0.348345	0.283165	0.300369	0.222948	0.395955	0.804373	0.245583	0.367492	0.629493	0.357132	0.19167
ENSG00000158246	3.71922	0.976572	3.11381	4.68605	4.56462	5.55765	2.55996	2.94915	5.68329	5.06585	4.95607	5.48485	1.00817	5.34887	4.69228	3.47217	4.87111	4.20402	5.64345	6.22636	4.93915	4.00576	1.6212	2.81566	1.40084	1.92522	0.602025	3.12247	5.42546	4.08726	5.95591	3.94592	4.77249	2.25677	1.65519	4.2443	5.20569	5.09678	4.52659	4.78452	5.21715	4.63272	4.41842	2.67982	4.32559	5.11116	2.93041	4.43627	3.74301
ENSG00000151572	0.306625	0.227228	0.0589472	0.21147	0.457308	1.70787	1.23773	0.029326	0.0459268	0.430702	0.00481075	0.114708	0.597891	0.0328569	0.0888859	0.0100722	0.0598576	1.06126	0.0490429	0.0644869	0.0231198	0.0441386	0.111984	1.97057	2.27297	0.0653238	0.0474874	0.0049125	0.0125048	0.15157	0.0564113	0.692864	2.07721	0.00628804	0.0648584	0.41938	0.165899	0.114788	0.0449832	0.0585554	0.746846	0.0471524	0.148325	0.0483738	0.161389	0.0359515	0.0722491	0.0725507	0.112527
ENSG00000096093	1.44601	1.50485	1.71938	1.46433	0.626783	0.526991	1.74344	1.26427	0.284703	0.518585	1.04778	0.982573	1.38377	0.558298	0.97406	0.395375	1.10256	2.45401	0.744608	0.866216	1.34206	0.90447	1.29953	1.0132	1.42898	1.81755	0.957317	1.06018	0.84208	0.694502	1.00715	1.7117	1.78719	0.973098	0.882847	1.00486	0.482115	1.21481	1.64828	0.444943	1.06362	0.407578	0.752225	1.3588	0.903718	0.721116	0.974761	0.917037	0.461249
ENSG00000146215	0.264239	0.148265	0.140058	0	0.0489839	0.00671355	0.0789877	0.0673749	0.0157574	0.0515013	0.0482652	0.0310458	0.208601	0.013477	0	0	0.0878181	0.82739	0	0.0527618	0.0282085	0.0301181	0	0.331768	0.0621104	0.0826667	0.254768	0.0297637	0.0378749	0.0418521	0	0.0732114	0.00735687	0	0	0.00978308	0.00915422	0.106595	0.081429	0.0258534	0.00828008	0	0	0.0750979	0.0517662	0.03661	0.0263911	0.0158674	0.036778
ENSG00000150787	2.97892	3.99522	4.02331	2.4092	2.18663	2.94631	1.48969	1.98719	2.12463	2.26481	3.54278	1.48466	2.44571	2.22806	2.14813	3.69126	2.87557	2.64403	2.43486	3.24493	3.46638	3.28153	3.30435	2.18799	1.86521	2.50284	4.04844	2.47311	2.83651	2.73871	2.92269	2.77594	2.68729	2.59499	2.20779	1.77664	2.63067	2.65824	2.17282	2.7105	1.76161	2.78491	2.41603	2.65855	2.03287	1.7699	2.67732	2.06976	2.45421
ENSG00000033050	4.26938	3.90013	4.48346	3.40678	4.0422	3.70156	4.05271	4.76558	4.04319	3.50072	4.47669	4.32638	4.1377	4.5835	4.5579	2.83813	3.83179	3.50735	3.39203	4.20156	4.02222	4.3775	4.07105	4.16102	4.27481	4.28196	4.71702	4.87332	4.68474	4.4376	4.40959	4.63991	4.74934	4.90649	3.79851	4.14399	4.35708	4.07687	4.18159	4.23696	4.24173	4.22384	4.03648	5.59133	3.89154	3.94401	4.46189	4.63091	4.74656
ENSG00000276911	0	0	0	0	0	0	0	0	0	0	0	0	0	0	0	0	0	0	0	0	0	0	0	0	0	0	0	0	0	0	0	0	0	0	0	0	0	0	0	0	0	0	0	0	0	0	0	0	0
ENSG00000277481	0	0.0344836	0	0.0408313	0.0175245	0.00633602	0.0253147	0.00811288	0.0111698	0.0153792	0.00923349	0.022041	0.0607772	0.0127208	0.0362568	0.0336072	0.0369052	0.0344003	0.0701864	0	0.0266333	0.00954155	0.0106199	0.00462407	0.0198265	0.023887	0.00771299	0.00472194	0.012021	0.046009	0.0110165	0.0521956	0.0138533	0	0.00977617	0.00923349	0	0.0258658	0.0347123	0.00409689	0.0233183	0.0303904	0.00880532	0.0144756	0.0344016	0.0173892	0.0249166	0.018698	0.0312945
ENSG00000196950	2.13288	2.89813	2.13603	1.32079	1.62821	1.16068	2.45342	1.9749	1.56984	2.00456	1.20352	1.75117	2.55105	1.9851	2.14536	1.91787	2.29787	2.8784	0.368976	1.46304	2.18961	1.37629	2.34214	2.64065	2.85762	2.02212	2.19086	2.83902	1.13622	1.83083	1.68494	1.76255	2.35541	1.67212	2.09277	1.7453	1.46034	1.96409	2.7834	1.85535	1.68652	1.6609	2.00089	2.7132	1.88651	2.19596	1.59286	1.63145	2.62396
ENSG00000186146	0	0	0	0	0	0	0	0	0	0	0	0	0	0	0	0	0	0	0	0	0	0	0	0	0	0	0	0	0	0	0	0	0	0	0	0	0	0	0.103398	0	0	0	0	0	0	0	0	0	0
ENSG00000275379	0.084041	0.688846	0.0713589	0.0729634	0.0724913	0.222842	0.291509	0.146658	0.0465224	0.11282	0.112659	0.13405	0.596712	0	0.174754	0.278519	0.303477	0.284555	0.0977027	0	0.109111	0.223887	0.408285	0.266692	0.285461	0.0981437	0	0.114954	0.612782	0.303617	0	0.626398	0.0433624	0	0.119036	0.266695	0	0	0.157715	0.100232	0.0958646	0.0939964	0.158547	0.0892012	0.12064	0.690254	0.0520373	0.136201	0.281843
ENSG00000198211	0	0.0144519	0	0	0	0	0	0	0	0.00577977	0.0172448	0	0.00682252	0.0119154	0.0272465	0	0	0	0	0	0.00836622	0.00893676	0	0	0	0	0	0	0.0335187	0	0.0103186	0	0.0129764	0.0112993	0.0272972	0.0172448	0	0	0.00820151	0.00766334	0	0	0	0	0	0.0108803	0	0.0140301	0
ENSG00000161911	0.551358	0.602407	0.224821	0.157061	0.137463	0.245086	0.283567	0.0965237	0.326897	0.293285	0.225052	0.124263	0.350573	0.107849	0.279921	0.0665557	0.332888	0.148957	0.183876	0.578116	0.16318	0.203148	0.142225	0.479134	0.299158	0.610468	0.0268605	0.1269	0.269429	0.0907398	0.595101	0.56982	0.973812	0.198095	0.538932	0.801411	0.130614	0.311501	0.353282	0.297837	0.485287	0.0657718	0.0457133	0.110421	0.367435	0.0203001	0.255075	0.10188	0.279227
ENSG00000128340	4.83859	5.91159	6.02314	5.95493	5.67773	5.35709	5.66663	3.78728	5.83344	5.98929	4.34722	5.40991	4.18315	5.15589	4.47489	4.97386	3.93369	4.28875	3.84096	5.30394	2.96884	5.50366	2.46686	5.1274	4.13636	5.6013	3.61071	5.05298	2.96569	5.34204	3.8139	4.87648	4.1789	1.84936	5.26965	4.60106	5.98449	4.04349	4.5631	4.67646	3.81919	5.59253	3.96818	3.81463	5.67772	4.81752	4.41438	5.1149	4.59715
ENSG00000144821	0.0410153	0.0514752	0.0945273	0.0928918	0.132701	0.419611	0.0715375	0.00548704	0.0150749	0.012483	0.00935849	0.0346002	0.0341365	0.208637	0.245772	0	0.0250408	0.140771	0.00538981	0.13874	0.00604194	0.0351468	0.0143337	0.0155637	0.0100819	0.15421	0.0763314	0.465739	0.00407263	0.0618363	0.142207	0.0899202	0.0822637	0.155071	0.0164766	0.105578	0.118008	0.301305	0.0147619	0.0220096	0.138721	0.0659188	0.0236772	0.140402	0.449673	0.0804633	0.0744677	0.0401307	0.058192
ENSG00000151304	1.77939	2.42143	2.54512	2.26617	2.48246	2.51473	2.41117	2.33831	1.85576	1.54948	1.90569	1.71421	2.38675	1.49971	2.53754	1.26027	2.94589	2.91982	0.704398	1.71202	2.21347	2.19417	2.22633	2.3891	2.50806	1.90081	1.98414	2.5153	1.88974	2.06337	2.14204	2.41561	1.93272	1.96261	2.27858	2.04912	2.15482	2.17408	2.78043	2.2579	2.41895	1.90965	2.48512	2.8159	2.49807	2.45201	2.49784	1.9157	2.6322
ENSG00000165410	1.89654	3.29766	3.95448	2.89216	1.97327	2.21813	1.8706	0.92017	1.52888	2.03612	0.635365	1.14382	1.74804	1.47665	2.374	1.50759	1.62176	2.24178	0.814066	2.93908	0.91538	1.92112	1.87154	2.11953	1.80643	2.1472	2.39043	1.97617	0.683421	1.99897	1.48183	2.3605	2.99711	0.971421	1.72549	1.4013	1.86756	2.29245	1.22263	2.50723	1.72636	1.84246	2.48937	1.34639	2.07575	2.29338	1.43128	2.11785	2.70279
ENSG00000118503	3.08943	3.3515	5.46902	5.39331	4.40129	3.95226	6.51779	3.66466	6.28798	6.41648	5.86154	4.15355	4.39946	5.20549	4.54146	1.58977	3.90118	6.58793	4.95371	3.61599	4.28969	6.31092	4.40846	5.12377	4.45038	4.73049	3.23486	5.55065	4.06514	4.26605	5.10409	5.93687	3.86184	4.18167	4.60838	4.36076	4.99385	3.4	5.76778	5.07788	3.34921	4.80672	5.66022	4.6903	4.99178	4.33038	5.77051	4.3059	5.93072
ENSG00000175352	0.937228	3.42683	2.22175	1.59052	2.65446	1.72148	2.28804	2.38709	2.18312	0.402321	1.81308	1.07708	0.938082	1.56284	1.11217	1.00751	2.65268	3.5428	0.793601	0.437846	3.23677	1.50631	3.06992	1.97484	2.97725	1.28603	0.955739	1.46089	0.402501	0.382441	0.506359	1.90638	1.09392	2.19662	2.01873	1.18083	0.540479	1.34341	0.927551	1.29625	2.3541	1.32961	0.89289	0.355864	1.65419	0.888453	0.828775	0.329534	0.869059
ENSG00000178385	0.186078	0.5422	0.34319	0.588526	0.929951	0.296941	1.96738	1.04996	1.2315	0.538389	0.850386	0.550053	0.396746	0.418174	0.793421	0.134547	0.639682	0.946871	0.275359	0.281987	0.540272	0.249678	0.877642	0.84463	1.21959	0.798646	0.442697	0.561586	0.397978	0.331657	0.650021	1.22677	1.39333	0.882708	0.914184	0.958129	0.942787	1.39847	1.20066	0.946527	1.22672	1.00312	0.872298	0.991384	1.42135	0.730285	0.749182	0.794216	0.736877
ENSG00000260596	0	0	0	0	0	0	0	0	0	0	0	0	0	0	0	0	0	0	0	0	0	0	0	0	0	0	0	0	0	0	0	0	0	0	0	0	0	0	0.0111709	0	0	0	0	0	0	0	0	0	0
ENSG00000198520	0.293744	0.0314921	0.219787	0.14763	0.189643	0.13432	0.275897	0.0906136	0.313248	0.190035	0.102733	0.250482	0.32121	0.120698	0.19168	0.261879	0.402893	0.572248	0.207434	0.589813	0.0576867	0.113333	0.093194	0.137718	0.247886	0.630694	0.156313	0.20256	0.132484	0.0432152	0.138421	0.514536	0.0669956	0.15989	0.355169	0.171878	0.0963243	0.27256	0.731041	0.269601	0.269201	0.0249994	0.1116	0.109238	0.340361	0.229684	0.131403	0.269806	0.194136
ENSG00000168078	2.2329	4.86723	4.22957	2.86062	3.77793	3.11398	3.77828	3.18127	1.18217	2.09719	3.08241	2.21266	4.85411	2.64212	2.55507	1.77634	4.46088	4.93287	2.38679	1.95228	3.29928	3.34856	4.04032	4.27065	4.87951	3.38148	4.76054	2.75761	1.90406	2.15976	1.64009	3.56622	2.49119	2.23885	2.23713	2.03532	3.55765	2.16481	1.39513	2.17317	3.22458	2.14781	4.10256	2.76163	1.68274	3.78589	3.5358	2.04266	2.13924
ENSG00000140836	0.945147	0.459676	0.469452	1.82415	1.13456	0.409422	1.29659	1.99122	0.92862	1.86354	1.19427	0.941605	1.28671	0.946586	1.20934	0.49163	1.27729	1.17599	0.546649	0.613401	1.51114	0.73912	2.16617	0.75898	1.49875	1.54391	0.791482	1.02236	0.795482	0.902295	1.10803	1.67088	1.82081	1.18079	1.87139	1.51046	1.41925	1.8288	1.47245	1.50233	1.27196	1.48573	1.59035	1.53819	1.67417	1.0899	1.36059	1.28726	1.66338
ENSG00000165805	0.00632712	0.0803855	0	0	0	0.0175502	0	0.0037656	0	0	0	0	0.020166	0.0117948	0.00679048	0	0.0245393	0.0498376	0	0	0.0409399	0	0	0.0128217	0.0092225	0	0.00715059	0.0130923	0.0277044	0.00617721	0.00511609	0.00409968	0.00643686	0	0.00453902	0.00428662	0	0.0144423	0.00406491	0.00379782	0.0108538	0	0.00408752	0.0100785	0.00460267	0.00539511	0.00387743	0	0
ENSG00000165617	2.84227	2.29907	1.13586	1.4779	1.07298	0.393343	0.311315	0.396918	1.39941	1.92583	0.250454	0.39498	2.25984	1.82506	3.20411	1.55271	0.244034	0.83379	0.106972	1.22841	0.260345	0.339226	2.34017	0.15253	1.13599	3.137	0.144724	1.95368	0.713195	1.30376	0.743777	1.82592	0.587603	0.81423	3.50999	1.01065	0.929162	2.4101	0.828179	2.53055	0.925499	2.92834	2.05098	0.840838	2.83095	3.66738	1.11543	1.55998	3.03659
ENSG00000148337	4.57304	3.64494	3.88699	4.65389	5.09516	4.50067	4.77886	4.91216	4.17835	4.6195	4.90041	4.68711	4.63485	4.26539	4.79347	3.38397	4.50728	4.69855	4.19275	4.13044	4.87458	4.63024	4.60545	3.9054	4.20564	4.55962	4.11967	4.19874	4.08208	4.25659	4.02295	5.51186	4.53598	4.77027	4.42777	4.55436	3.81587	4.64865	4.37126	4.00094	5.46761	4.32023	5.32037	5.20639	4.40736	4.93357	5.10017	4.73228	4.54605
ENSG00000117298	4.65214	2.93352	3.39988	4.62751	5.9585	4.6482	7.44092	5.68942	4.16244	5.57393	5.87871	4.8037	5.03827	4.58268	5.02899	4.86168	5.56111	5.22354	3.45957	4.20902	5.41063	4.79559	5.51649	5.65161	6.02115	5.94879	4.30973	4.62548	4.79706	3.97077	3.99182	5.53195	4.37919	4.78619	5.82944	4.88171	4.32807	4.47049	4.85782	3.85886	5.16216	4.93279	4.79889	4.55266	4.89893	5.2034	5.35534	5.16968	4.88416
ENSG00000125815	0	0	0.0323853	0	0.0650788	0	0	0	0.0210144	0.0346073	0	0.0815102	0.0607429	0.0357346	0	0	0	0.0821169	0.210204	0.0700683	0	0.0268568	0	0	0	0.0447674	0.043147	0.17628	0.0337834	0	0.148647	0.165702	0.0195752	0	0	0.0515293	0.0482615	0.0579445	0.048905	0.0230502	0.02202	0.0215801	0	0.0204528	0	0	0.0694694	0	0.05852
ENSG00000013375	2.35726	4.19213	3.50251	2.2913	2.48757	2.22064	2.65415	2.43903	2.35687	3.13995	2.38558	2.53046	2.46441	2.18979	3.00501	2.23307	2.75454	3.51549	1.47024	2.39342	3.19247	2.54937	2.80277	2.26166	2.74224	3.03954	2.83976	3.18923	2.66863	2.2649	2.94264	1.61901	2.81776	3.00838	2.64679	2.71797	2.5013	2.86301	2.3251	2.65562	2.15423	3.2403	2.48253	2.74229	2.91668	2.42083	2.46017	2.63055	3.20915
ENSG00000169189	3.85964	4.20095	4.08774	3.83351	3.43712	4.08566	3.32129	3.77318	2.41806	3.32712	3.62867	3.53925	3.64758	3.61453	3.69374	5.43035	3.749	3.21582	4.02345	4.11967	3.22509	4.02154	3.40431	3.96886	3.8428	3.00811	3.35934	3.21099	3.68307	3.67059	3.17787	3.29373	3.2259	3.53904	3.10429	3.70166	2.70141	3.47039	3.4015	3.54437	3.20543	2.6543	3.16914	2.66689	3.06586	3.19808	3.52689	3.33872	2.49662
ENSG00000203663	0.0373886	0.0213115	0.0626577	0.0323911	0	0	0	0	0.0607855	0.146405	0	0.209477	0.0200771	0	0.225387	0	0	0	0	0.196557	0	0.150844	0	0	0	0	0.042196	0	0	0.358332	0.226217	0.0717568	0	0	0	0.582745	0.0471996	0	0.0241128	0	0	0	0.024246	0	0.0540496	0.093749	0	0.15777	0
ENSG00000069206	0	0	0	0.00684504	0	0	0	0	0	0.00715458	0.0053613	0	0.0210196	0	0	0	0	0	0	0.0146279	0	0	0	0	0.00577636	0	0.112123	0	0	0	0	0	0	0	0.00567685	0	0	0	0	0	0.00905892	0	0	0	0	0	0	0	0
ENSG00000064655	1.63167	0.537933	0.332514	0.28456	3.86601	0.450843	4.95935	2.93984	1.00908	4.01573	3.03096	1.62096	3.58477	0.721636	0.178434	3.54749	3.5222	5.72073	0.172941	2.54816	0.181257	0.362955	2.06342	5.95976	5.18524	3.00526	0.3356	1.54466	0.246545	0.294164	0.429718	2.45246	0.0731254	0.29778	3.49864	1.66786	0.197532	0.633301	3.00136	2.20553	2.83957	0.797436	1.16377	0.908196	1.25225	0.504064	1.11374	0.608682	1.3231
ENSG00000162695	2.11888	3.02894	2.45902	2.30313	2.17301	2.14776	2.81452	2.52924	1.98158	2.43926	2.17856	2.00933	2.05089	2.16606	2.82346	2.03682	2.60949	2.74606	1.03224	1.78161	2.29713	2.29413	2.43424	2.35299	2.17885	3.01023	1.89339	2.70816	2.1175	1.98221	2.30089	2.01893	2.71121	3.05025	2.3859	2.22604	2.33226	1.992	2.46308	2.5271	2.30285	2.75834	2.34408	2.49562	2.6802	2.50695	2.19622	2.36924	3.07349
ENSG00000123643	2.27583	0.859817	1.72983	2.21634	1.99154	1.97003	2.53588	2.8229	2.54781	2.52586	2.50639	1.85834	2.21541	1.91983	2.15011	1.21357	1.90324	2.04345	0.82499	1.58318	2.53766	1.64055	2.94641	1.98821	2.24295	2.61723	2.20335	2.15945	2.02259	1.69348	2.09089	2.4679	2.2018	1.76622	2.75881	2.60948	2.92457	2.98952	3.10322	2.74097	2.1429	1.99314	2.22928	2.7995	2.93992	2.04021	2.18277	1.99453	2.58841
ENSG00000110107	5.81092	4.52094	5.81817	5.46933	5.96427	6.3233	6.20216	7.11936	4.54752	6.14026	6.20331	6.38913	6.46956	6.49944	6.05894	5.75503	6.40909	5.8024	4.85531	5.90599	6.67252	5.90377	6.21222	6.91079	6.02213	5.56275	6.04747	5.66661	5.54683	4.93355	5.49228	5.97913	5.98154	5.31589	5.33683	5.73496	5.6169	5.40149	6.27518	5.79645	6.25695	6.24501	5.80345	6.03082	5.62903	6.63058	6.45363	6.26104	6.02028
ENSG00000167377	0.0944562	0.139646	0.0957728	0.513161	0.089419	0.0247048	0.0968854	0.122361	0.0677201	0.299732	0.126469	0.0645593	0.0859644	0.0536844	0.204795	0.0206449	0.235042	0.189277	0.0170039	0.0445302	0.208005	0.0732401	0.102722	0.123437	0.0997342	0.167465	0.126694	0.238912	0.208156	0.0967465	0.128256	0.329158	0.107613	0.163259	0.189895	0.114309	0.0752849	0.301382	0.151551	0.117981	0.178561	0.105601	0.160832	0.136096	0.151446	0.142504	0.106544	0.128386	0.143134
ENSG00000131781	0.346891	0.218359	0.269521	0.214472	0.302777	0.313532	0.253602	0.275731	0.0972805	0.207285	0.195335	0.287614	0.25779	0.117179	0.369349	0.240378	0.490647	0.420433	0.0274989	0.350219	0.596887	0.0925821	0.499672	0.22661	0.235444	0.733068	0.301926	0.202774	0.0464238	0.143442	0.154684	0.42651	0.244109	0.196424	0.329853	0.17053	0.15675	0.53229	0.42337	0.360689	0.343566	0.230621	0.309493	0.213928	0.387804	0.116705	0.158338	0.181028	0.36016
ENSG00000140832	2.05094	1.67627	1.98721	2.36115	1.99992	2.05579	1.54611	2.34414	0.819496	2.45306	2.15178	1.35402	2.11216	2.18817	1.43712	1.43437	2.6996	1.67901	1.51301	1.22184	1.74388	1.47066	2.78023	1.88372	2.43819	1.4045	1.50682	1.4274	1.57401	2.22926	1.74786	1.90825	1.48221	1.75722	1.04345	1.12137	1.39253	1.62733	1.86075	1.00167	1.91403	1.16385	1.34375	1.46619	0.497244	1.06722	2.39434	2.35677	1.9939
ENSG00000227471	1.07872	1.66766	2.91283	1.05912	3.26958	2.42866	0.0682407	1.65604	1.79539	1.94313	3.9351	5.50666	0.255706	3.25462	1.46408	3.59476	0.906083	0.714958	2.47397	3.18255	0.975456	2.118	0.165173	0.0775388	0.804433	3.66419	3.0677	3.07952	2.94334	1.60121	2.103	2.26075	3.78552	2.7238	1.95845	1.93019	2.49801	1.71116	2.35803	1.9957	2.51971	3.33208	0.847438	1.30241	1.03262	1.43977	2.93307	0.91786	1.66866
ENSG00000186132	2.20637	3.17969	3.20565	3.2518	1.7919	2.1302	1.32259	1.69793	1.69042	1.61637	2.14336	1.78908	2.4982	1.97992	1.56013	2.85637	2.74549	2.59644	1.7173	2.67825	2.3052	1.54978	2.01424	1.68754	2.31089	2.06902	2.69043	2.12737	2.19183	2.87339	1.98101	1.46095	1.90548	2.05605	1.76942	2.01455	1.19604	1.68328	1.35851	1.88493	1.49316	1.8447	1.15941	1.8238	1.50048	1.39454	1.9106	1.62137	1.46434
ENSG00000176678	1.79243	0.30045	1.26176	1.1538	1.06902	0.457362	1.28978	0.108825	1.27823	2.20642	0.181179	0.820849	1.81324	0.629997	2.60013	1.61049	0.0438438	0.467972	0.599912	0.525586	0.286928	0.578438	0.174167	1.53165	0.218367	1.84715	0.0318797	1.66154	0.0735631	0.891749	0.17351	0.83581	0.558308	0.218253	0.788602	0.396909	0.159418	0.658179	0.616257	0.288369	1.37	1.29019	0.936868	0.0447774	0.427456	1.68125	1.56585	0.296737	0.686467
ENSG00000180432	0.039498	0.00905059	0.00675425	0.0137863	0.00686388	0.0184658	0.00745496	0.018924	0.0130677	0.0144082	0.0215269	0.0342581	0.0379687	0.0222642	0.0423552	0.00567528	0.0124495	0.0345173	0	0.100319	0.0156492	0.0657228	0.0124247	0.00541184	0.0346369	0	0	0	0.607906	0.0461649	0.106048	0.0307809	0.0754003	0.0280877	0.0340461	0.192592	0.0301181	0.139673	0.0653341	0.0794237	0.0362346	0.00896082	0.0457943	0.021134	0.051473	0	0.0146369	0.0218654	0.0761422
ENSG00000159374	0.0918573	2.39434	0.0492593	0.0102168	0.126678	0.0802591	1.05753	2.96743	0.112122	0.0106783	2.64816	0.0442206	0.0859791	0.0328375	0.0126701	0.414226	0.0365512	2.24119	0.565565	0.314588	0.00774321	0.0246733	0.0720587	1.18172	2.24518	0.145463	0	0.0483596	1.8019	0.0229644	0.0284645	0.145887	0.0357387	2.39405	0.284502	0.0704879	0.0516274	0.41394	0.21196	0.846699	0.0728189	0.058669	0.037767	1.45817	0.123819	0.0100707	0.0569356	0.0637975	0.133717
ENSG00000143369	5.35117	6.05642	3.03907	6.19574	6.27596	6.96612	4.01317	5.26625	6.27126	4.59887	7.85344	6.01793	4.37776	6.79405	3.67428	3.76466	5.85954	6.6937	6.91866	6.66487	4.82406	6.4	5.02698	2.18482	3.45085	6.09822	4.23202	4.10792	6.22351	6.04683	4.27989	4.39783	7.60715	7.05777	5.54509	6.8342	6.13493	6.1163	6.14067	5.81828	6.55891	6.15346	5.16525	6.06574	6.77989	4.39285	5.87933	5.65083	5.60694
ENSG00000167553	5.38264	7.89588	7.09565	6.70844	6.72748	6.94238	5.96467	6.39022	6.25492	5.91296	6.31035	5.96037	6.08097	7.22014	6.41847	4.50678	6.81108	5.75946	5.63762	6.1478	6.75777	6.48039	5.8374	6.14435	6.24109	5.73636	6.4577	6.21857	6.53607	5.75516	6.8647	6.46419	6.98333	6.92911	5.86229	6.39378	8.17452	6.56769	5.68313	6.41868	6.42208	6.99999	5.72288	6.98212	5.95201	5.83969	6.94144	6.20874	6.33601
ENSG00000136021	2.51586	3.82433	3.25858	3.60912	3.36133	3.26653	3.56693	3.3815	3.31351	2.74193	3.06696	2.262	3.15047	2.58248	3.0459	1.93053	3.54418	3.41113	2.01909	2.70951	3.38442	2.91976	3.19138	3.11759	3.26198	3.0472	3.48593	3.34497	3.28017	3.25418	3.47444	3.44423	4.17581	4.08827	2.95869	3.97124	3.43982	3.67352	3.31855	3.1712	3.22533	3.26317	3.23499	3.63367	3.15203	3.21226	2.83411	3.24375	3.21683
ENSG00000124596	2.09268	1.77431	1.80009	1.37758	1.79664	1.31465	2.12362	2.52208	0.817178	1.23451	1.9296	1.81955	2.0922	1.33611	1.70472	2.29015	2.23795	2.92019	1.46546	2.17053	2.33606	1.69118	1.77161	1.7315	1.93589	1.8153	2.26636	1.47884	1.92887	1.40157	1.69832	1.85432	1.52716	2.45079	1.36266	0.991078	1.23417	1.64133	1.42557	2.63268	1.9255	1.3851	1.79857	2.23365	1.49094	1.88239	1.87143	2.10225	1.50442
ENSG00000153283	0.895293	0.927642	0.342151	0.2449	1.66888	1.22672	2.94192	1.66455	0.82871	0.217174	0.776171	0.758918	1.25473	0.443179	0.929598	0.550703	1.21158	1.27403	0.38391	1.76992	0.675198	1.16309	0.581733	2.14056	1.13454	1.01745	0.4414	0.49991	0.226343	0.507792	0.272012	1.17836	0.179847	0.169935	1.49205	0.511782	1.57838	0.435708	1.34999	1.39893	0.89916	0.593613	0.595463	0.940348	2.38692	1.10356	1.00996	0.93789	1.16345
ENSG00000112799	2.25539	1.72539	2.16671	0.561751	1.99618	1.91947	1.32452	1.02057	2.53103	0.320566	0.399923	1.36423	1.3101	0.89753	0.550169	1.89607	1.47518	1.48585	0.922679	2.71679	0.300703	0.789968	1.71459	2.3083	1.56799	2.33934	0.315531	1.32694	0.730402	1.05297	0.652636	1.23219	0.650797	0.273662	3.53596	0.878547	1.09295	1.14733	1.56373	2.88332	1.16978	1.22338	1.02003	1.01743	2.87976	1.19558	2.15536	1.40868	2.73704
ENSG00000169684	1.10888	2.02782	1.20163	0.74567	1.12875	0.433539	0.147903	1.06241	0.157368	1.00417	1.16893	0.524217	1.46357	1.17516	1.15516	1.01396	0.634516	1.70956	0.232502	0.671441	0.671453	0.7775	1.08667	1.44272	0.951044	0.434427	1.34833	0.832637	0.62883	0.639707	0.350489	1.29764	0.515226	0.96041	0.397369	0.769642	0.38038	0.469059	0.330817	0.811433	0.786472	0.458617	0.36727	1.45424	0.161861	0.786634	0.331501	0.887414	0.335974
ENSG00000107929	2.507	1.82056	1.78929	1.9356	3.05647	2.86105	3.18189	3.44857	2.45409	2.23401	2.20383	2.47944	2.95259	2.20041	2.21885	1.43688	3.3656	2.83439	1.75431	2.34449	3.70105	2.70199	2.45057	2.63615	2.67366	2.98588	2.31357	2.44545	3.54139	2.37748	2.75487	2.30543	2.97713	3.21564	2.42099	2.95876	2.58047	2.74082	3.25483	2.36684	3.34348	2.77323	2.44585	3.55863	2.44183	2.10616	3.05567	2.46566	2.92603
ENSG00000242950	0	0	0	0.00500911	0.00497593	0	0.0479288	0.00344593	0.00316656	0.00523578	0.00392279	0.00313609	0.009261	0	0	0	0.00452205	0.00841153	0.00676174	0.0936616	0.102651	0	0.00451304	0.00392274	0.00844095	0.0665344	0.0130589	0.0119841	0.131986	0	0.0278666	0.0260592	0.0205137	0.0304975	0.0570922	0.0233783	0.00367016	0.0436049	0.0548154	0.0975361	0.049002	0.019405	0.0186066	0.0214331	0.0125994	0.0147617	0.00708786	0.00954523	0.00297821
ENSG00000169682	0.676377	0.475727	0.520215	0.796226	0.493363	0.637084	0.82421	1.00647	1.06629	0.86386	0.862895	1.29447	1.51951	1.56609	1.29369	0.12129	0.765828	0.407212	0.456413	0.432305	1.05462	0.628413	1.19312	1.0585	1.29078	0.902888	0.732451	0.865954	0.943713	0.697775	0.888514	1.38059	1.11818	0.591236	0.967556	0.5951	0.744422	1.3576	1.14153	1.10708	1.07184	0.867535	1.02617	0.917101	0.617394	0.920094	0.664644	0.828803	0.841341
ENSG00000180549	0.553352	0.0833648	0.0902037	0.178895	1.24913	0.849152	1.07929	0.184158	0.375313	0.0845754	0.247705	0.868678	0.46136	0.411049	0.363729	0.668438	0.400802	0.345398	0.391826	1.41248	0.193714	0.499656	0.0833304	1.01935	0.445657	0.641397	0.133654	0.30738	0.182282	0.152857	0.147903	0.304196	0.140017	0.0828786	0.474968	0.353601	0.407413	0.196094	0.496055	0.450156	0.342255	0.292628	0.206605	0.248143	1.3249	0.432642	0.408321	0.293626	0.584992
ENSG00000172331	4.99312	4.84657	4.09765	2.95133	5.00175	3.51446	4.3208	4.08441	4.9495	3.99339	4.25182	4.5711	4.08693	4.85212	3.81346	4.73401	5.82647	4.25595	3.81533	5.74112	4.58646	6.20306	3.40999	3.23685	3.81157	7.12774	5.17405	3.86728	5.1545	3.52274	5.6195	4.29663	5.93032	3.97746	4.08249	4.42516	3.74328	5.16242	3.53793	3.13989	3.58422	4.41849	4.63914	3.66003	4.09489	3.94423	4.55076	5.62397	3.80753
ENSG00000102195	0.105432	0.322718	0.0603616	0.163768	1.55203	0.0334517	0	0.114568	0	2.44611	0.0122896	1.51934	0.359831	0.305684	3.83031	0.135787	0	4.20514	0.0625113	0	0.0469808	0	0.458463	0	0	0	0.192633	0.25362	0.0318138	0.0176883	0.0858044	4.42092	0.124315	0.0160508	0.0763626	2.42763	0.0229096	0.0275546	0.0685617	0	0.041169	0.303351	0.187348	0.129683	0.0392225	0	0	0	3.59803
ENSG00000169402	0	0.0080544	0.0119956	0.00614858	0	0.00330285	0	0.00423034	0	0	0.00481556	0	0.015132	0.00663815	0.00762755	0	0.00555094	0.00517034	0	0	0.0277271	0.0148782	0	0.0048155	0	0	0	0.00981812	0	0	0	0.0091965	0.00723045	0.0125613	0	0	0.00899701	0.0108318	0.0843848	0.00426653	0.00813784	0.00399275	0.00459193	0.00378298	0.0154563	0	0	0	0
ENSG00000188092	0.531864	0.610804	0.666811	0.281632	0.275032	0.396056	0.378214	0.610994	0.226798	0.452435	0.426535	0.617595	0.783685	0.538159	0.388159	1.19531	0.450697	0.642523	0.217087	0.56529	0.634591	0.391675	0.652013	0.47786	0.390929	0.558317	0.639833	0.383932	0.281769	0.46368	0.376655	0.526777	0.389213	0.448888	0.466207	0.279994	0.200085	0.328865	0.387055	0.281676	0.560651	0.367956	0.385532	0.291921	0.334994	0.306837	0.331462	0.24442	0.309078
ENSG00000124785	1.46357	1.29078	3.5135	4.72875	1.54126	0.906759	0.775329	4.82355	0.983904	3.53281	3.60186	1.08228	3.65844	0.39666	0.596001	1.41236	0.842841	3.63067	0.245562	1.61379	2.3083	3.1415	3.29803	2.37089	2.11171	1.81166	0.337279	0.337506	2.25536	1.43607	0.630213	3.44088	0.641768	1.23274	1.74898	0.654032	1.28014	1.41387	1.07128	1.39973	1.30317	0.63476	1.08016	3.24645	1.86728	3.23605	0.926987	0.874353	1.75611
ENSG00000178093	0.736299	0.555531	0.485726	1.08826	0.18883	0.0390974	0.709527	0.827265	0.112165	0.685881	1.12576	1.14343	1.29937	0.98633	0.804504	0.224176	1.02829	0.559093	0.271938	0.656147	1.20073	0.355637	1.59332	0.808482	1.23893	0.571686	2.004	0.902732	0.529955	0.504818	0.575676	0.564662	0.437005	0.365394	0.477718	0.111228	0.270459	0.858331	0.641978	0.26797	0.872262	0.200976	0.909826	0.573157	0.527156	0.449749	0.50263	0.68031	0.314189
ENSG00000141469	0.0547308	0.0558195	0.0140776	0	0.0143055	0.0357966	0.129376	0.0360326	0.0211779	0.687027	0.0261967	0.0991389	0.122664	0.0155436	0.0529072	0.0235707	0.0886613	0.262524	0.0385763	0.165827	0.036076	0.0460917	0.059592	0.167398	1.4765	0.149136	0	0.0115236	0.0340452	0.00543552	0.0134629	0.09436	0.0419481	0	0.0549309	0.0446217	0.017558	0.110571	0.059627	0.0907548	0.0221914	0.0340299	0.0320496	0.0974665	0.221383	0.0605272	0.0370905	0.027361	0.120905
ENSG00000186350	3.96616	1.98566	3.26721	4.11492	3.69562	4.02222	4.6342	4.01745	3.88554	4.12818	3.80531	4.75151	3.20282	3.83659	3.71212	3.77714	3.27246	3.19833	4.09733	3.41266	4.30466	3.56621	3.9207	3.68701	3.73505	3.95005	3.40704	3.26412	3.69971	3.5851	4.09971	4.09022	4.46244	4.87045	3.73946	4.0194	3.74496	4.55116	4.48546	3.29187	5.043	3.5132	4.68303	3.67962	4.08131	4.33418	4.68825	3.89519	3.89279
ENSG00000187134	1.09667	4.93646	2.25892	1.7087	1.45447	0.703243	1.40808	5.90921	1.63135	1.00024	5.90491	3.35699	0.283894	4.74376	1.32582	4.66326	5.74722	2.98997	5.14243	2.13675	3.18032	1.75545	6.09462	0.281412	1.55693	3.8758	7.85179	1.99519	2.02774	1.45322	2.12237	4.5044	3.17007	1.98821	1.0541	2.59158	1.56051	0.953754	2.34156	0.698299	2.83925	1.32301	1.13381	1.87837	1.07572	1.29483	2.17415	0.914113	2.33736
ENSG00000099953	7.35051	3.43188	1.43032	2.97423	2.65604	1.83893	2.52624	2.84109	5.52687	2.76371	1.68206	1.43623	6.31021	4.39704	3.12263	3.05922	2.01615	5.02924	3.16378	5.45167	1.41279	2.21903	7.88217	2.12006	5.31819	5.01906	4.30484	5.22738	5.21076	4.45507	2.08848	3.529	1.95815	1.92282	7.4942	2.93226	3.40217	5.74839	1.61823	4.30041	3.24333	6.03828	4.10229	4.02455	4.1954	5.34821	2.88553	5.21897	5.13073
ENSG00000257103	4.6581	4.38511	4.11357	4.53387	4.37175	4.22736	5.18465	4.1113	3.96282	5.44309	4.25711	3.85377	4.45337	3.85934	4.49486	3.39796	5.05197	5.21209	3.40865	4.31314	4.7711	4.68127	5.05691	5.21968	4.5143	4.37075	4.1137	4.88014	4.72629	4.38654	4.42266	4.24016	4.61732	4.47649	4.47564	4.66514	4.35974	4.52255	4.42129	4.32739	4.50889	4.36527	4.84748	4.44374	4.51549	4.41322	4.72607	4.41106	4.82293
ENSG00000185634	0.134336	0.37553	0.0630672	0.176465	0.3357	0.0560694	0.0850391	0.501684	0.143282	0.0924333	0.150708	0.0922149	0.308872	0.0325001	0.436731	0.343123	0.0539297	0.0988843	0	0.0946634	0.121511	0.636707	0.066972	0.0545562	0.130832	0.721581	0.226602	0.221394	0.0999655	0.192706	0.144265	0.632473	0.100835	0.075876	0.181547	0.21713	0.0294215	0.188544	0.432721	0.0619747	0.0364905	0.119967	0.20444	0.0906556	0.260703	0.0778677	0.0389796	0.0723873	0.334755
ENSG00000163531	1.13112	0.249194	0.388045	0.638116	1.05749	0.58778	0.26186	1.37252	0.404447	2.1052	0.11944	1.38119	0.208237	0.702879	0.786842	0.260028	0.349513	0.783454	0.227232	0.80346	1.25548	0.622245	0.172885	0.0814275	0.0989918	1.09383	0.170925	0.184241	0.202026	0.753326	0.563404	0.615445	1.03979	0.342354	1.01226	1.32254	0.640953	0.919456	0.519059	1.23852	1.22045	1.04776	0.70748	0.281748	0.638736	0.46917	1.24251	1.37847	0.664849
ENSG00000169188	3.67447	3.40991	3.26101	3.70379	3.86935	4.145	3.9581	4.5767	3.40215	3.56619	4.14952	3.73999	4.32734	3.54039	4.10943	3.7478	4.1481	3.66527	3.31406	4.04814	4.02936	4.31795	3.92981	4.48189	4.04895	3.50481	3.6067	4.07888	4.48727	3.93613	4.64829	3.97065	4.25477	3.93866	4.09046	3.6901	3.61811	4.11081	3.47064	3.87466	3.75168	3.39392	3.92113	4.50887	3.65016	3.75959	3.58571	4.45725	3.8787
ENSG00000131059	0	0	0	0	0	0	0	0	0	0	0.00967303	0	0.0377606	0	0	0	0	0	0	0	0	0	0	0	0.0104207	0	0.0161157	0	0	0	0	0.00925193	0	0	0	0	0	0	0	0	0	0	0	0	0.0206954	0	0	0	0.00734734
ENSG00000119777	4.61253	3.62276	3.80524	4.1831	4.4408	5.04731	4.43728	5.15972	4.06247	4.48702	4.51052	4.8809	4.46997	4.30793	4.39974	3.96601	4.15178	4.22917	2.86542	3.83098	4.71224	4.08735	4.04248	4.06628	4.30892	4.88707	3.70287	4.62596	4.47572	4.24638	3.98633	4.6527	4.25982	3.92925	4.79254	4.31224	4.23112	4.36991	4.47787	4.40571	4.52578	4.79535	4.87644	4.95516	4.62951	4.29284	4.8778	4.96666	4.63959
ENSG00000235173	4.36994	2.66409	3.0941	3.72642	3.05059	4.00688	2.8573	4.45492	2.3113	3.79392	4.03645	4.10737	4.97312	4.32525	4.28243	4.00873	3.43387	2.74833	3.63827	3.41192	4.44193	3.39837	4.34496	4.05715	4.11253	3.31695	2.96786	4.15886	4.31513	4.03895	3.25822	4.20138	3.04454	4.11372	3.39535	3.4826	3.56047	3.64589	3.67354	3.94547	2.74195	3.24202	3.7444	4.82649	3.01823	3.98607	3.8704	3.75063	3.91422
ENSG00000233087	0.599906	0.0261152	0.0387761	0.115846	0.187041	0	0.0427501	0.0806403	0.0742609	0.081704	0.0914674	0.0735633	0.0959978	0	0	0	0.104964	0.0979939	0	0.0836826	0.0596443	0.154117	0.0357727	0.0311375	0.129667	0	0	0.123163	0.0404462	0	0.176623	0.939645	0.0692615	0.040587	0	0.0914674	0.0291502	0.0692592	0.114701	0.183056	0.331576	0.0258576	0.142759	0.0245088	0.129238	0.0390966	0.0829707	0.0747688	0.0470043
ENSG00000130714	2.73737	1.33614	1.58291	1.22367	1.91524	1.25922	1.37449	2.71841	1.09838	1.90037	2.38484	2.09704	2.38485	2.3692	1.27095	1.76206	1.71537	2.26716	2.52748	2.23415	2.64086	1.78097	2.07163	2.17586	2.14049	2.54723	2.82134	1.57831	1.24675	1.57892	1.07506	2.4021	1.79756	1.47553	2.22275	1.67348	1.02292	1.90455	1.67409	1.73645	2.66203	1.74853	1.86243	1.88433	1.77253	2.59615	1.56953	1.83816	2.1956
ENSG00000187612	0	0	0	0	0	0	0	0	0	0	0	0	0	0	0	0	0	0.0274506	0	0	0.0247512	0	0	0	0	0	0	0	0	0	0	0	0	0	0	0	0	0	0	0	0	0	0	0	0	0	0	0	0
ENSG00000055813	0.00890434	0.0350112	0.00753077	0.0970786	0.14584	0.0164868	0.172634	0.127018	0.0193893	0.0160598	0.0180281	0.023965	0.101248	0.0248086	0.00955582	0	0.0813312	0.21105	0.0103961	0.0960433	0.0403751	0	0.0942691	0.0239875	0.0322184	0.10119	0.249712	0.00616201	0.0311816	0.0259251	0	0.0787715	0.0358982	0.0157301	0.197207	0.0707989	0.0168724	0.142643	0.0889428	0.190414	0.0796087	0.0875146	0.0341865	0.329688	0.238838	0.102838	0.0431021	0.0339964	0.156426
ENSG00000168743	1.65818	2.84981	1.31941	2.11739	4.90925	5.11219	5.69718	3.45667	1.12304	2.39435	4.30463	2.95369	4.09334	3.95467	3.89428	0.717088	3.48859	4.67011	1.43271	2.15154	5.76628	2.40532	3.60354	5.09791	4.1716	3.85788	3.7546	2.29469	3.31208	3.15454	3.38272	1.85176	3.6228	5.00503	5.05926	2.77611	2.92571	3.02783	3.28195	3.78285	4.34789	2.18542	4.13887	3.45465	2.42379	2.8239	4.9549	2.8283	3.48796
ENSG00000157600	2.44102	1.99595	1.73415	2.9804	2.66829	2.48872	3.0893	3.66774	3.21167	2.45661	2.6252	2.36515	3.73176	3.0234	2.75712	2.19673	3.0305	2.85274	1.93253	2.5158	3.08576	2.35736	2.86479	1.87966	3.0911	2.70199	2.10365	3.94759	2.65603	2.59582	3.29132	2.54648	3.60244	2.61885	2.89188	2.65686	3.05118	3.93695	3.75219	3.48439	3.42427	3.5028	2.8014	3.99411	2.91348	3.25244	3.20091	3.35282	3.00251
ENSG00000027644	0.120343	0.0351381	0.0406799	0.00601747	0.0758415	0.0256583	0.722032	0.0164895	0.0742467	0.12953	0.0280488	0.0445779	0.339941	0.038548	0.00746498	0.00986759	0.0162366	0.75587	0.0322169	0.0632005	0.0226521	0.0289783	0.0215657	0.327934	0.305949	0	0	0.16387	0.0483918	0.0468787	0.0279063	0.0790527	0.0246168	0.012294	0.182863	0.0600976	0.0605378	0.141764	0.0266093	0.350893	0.0663361	0.0946474	0.0443218	0.154528	0.211778	0.0235803	0.0337565	0.0114631	0.0868967
ENSG00000164938	2.35789	2.253	1.80902	1.53265	2.18421	2.08727	3.28082	2.91196	1.71601	2.08787	2.15071	3.26506	2.04686	1.61184	2.4762	1.85037	2.7484	3.16659	1.43007	2.44013	3.32271	1.52511	2.63323	3.16633	3.09982	2.44219	2.91178	2.64501	2.72967	1.20273	2.93395	3.00293	1.98734	1.33504	2.47559	2.64699	2.25944	3.18789	2.70503	2.79417	3.18615	2.73281	2.92974	2.24305	3.62704	2.30432	1.29557	2.94321	2.42366
ENSG00000060566	0.0132203	0.136378	0.227992	0.0114404	0.0559494	0.0896155	0.228761	0.0157087	0.0287371	0.0178984	0.078736	0.00716855	0.167155	0.0367359	0.014186	0	0.020587	0.0286787	0.0154313	0.0244042	0.00867146	0.0900554	0.0103097	0.104053	0.0287783	0.148007	0.0588392	0.00915298	0.01167	0.0257012	0.0106948	0.0506922	0.0333905	0.0117111	0.0375932	0.0267256	0	0.0595554	0.0666435	0.0623522	0.0375384	0.00743392	0.0338922	0.03488	0.181236	0	0.0241923	0.0217568	0.0988949
ENSG00000101144	2.20992	2.08299	2.69283	2.59759	3.50526	2.29291	2.63471	4.16555	1.20332	3.41923	3.61873	2.9699	2.64854	3.14401	0.620364	4.42318	4.10912	3.49879	2.66248	2.98294	4.34132	1.14807	5.57365	3.67373	3.81887	3.68844	4.03705	1.08615	0.539664	1.95551	1.17726	4.07843	4.19812	4.14623	3.52576	3.36547	3.35363	3.59024	3.21566	3.45851	4.88728	0.843289	1.77041	2.17705	1.45768	0.9949	4.78538	2.79978	0.676751
ENSG00000165076	0.016055	0	0	0	0	0	0.0149891	0.0190734	0	0.0072793	0	0	0.00859178	0.0149985	0.0172265	0	0.0125479	0	0.018737	0	0.0105343	0.0112522	0.012523	0	0.0233661	0	0	0.0221528	0	0	0	0	0.00818938	0.0967414	0.0115287	0.0324238	0	0.0484515	0	0.00964991	0.00921673	0	0.0103844	0.0170656	0.01169	0	0.00985178	0	0.0246747
ENSG00000183305	0	0	0.0123606	0.0251788	0	0.00679927	0	0	0	0	0	0	0	0	0	0	0	0	0	0	0.0191067	0.0102383	0.0670585	0	0	0	0	0	0.0256818	0	0	0.00947657	0	0	0	0	0.00927102	0.14891	0	0.0348039	0	0.126172	0	0	0	0	0	0	0
ENSG00000198590	0.08977	0.107459	0.0194426	0.0779574	0.0295346	0.0475667	0.104196	0.0137035	0.0188532	0.11077	0.0688747	0.0792253	0.0840215	0.0214633	0.060837	0.0721504	0.129568	0.342976	0.0916937	0.103475	0.102425	0.245246	0.217293	0.0538502	0.0333961	0.0921084	0.0888265	0.201386	0.163967	0.0554353	0.133951	0.189398	0.0577245	0.108567	0.0885337	0.148821	0.119565	0.142864	0.18789	0.0275095	0.271212	0.0573209	0.0222489	0.0894968	0.0250331	0.0389459	0.0419197	0.0744841	0.063998
ENSG00000072818	1.90842	1.68456	0.997786	0.78576	1.47849	1.17904	2.173	0.860629	1.14801	0.748667	1.16302	1.63457	1.60115	0.766486	0.826846	2.04452	1.79441	1.0894	1.46155	2.34178	0.975226	1.19683	0.64303	1.89671	0.991911	1.478	0.487319	1.06099	0.99324	0.612247	0.91949	1.73246	0.471955	0.515435	1.48451	1.37051	1.15353	1.06172	1.60753	1.39708	0.97424	0.742442	1.02559	1.0803	2.44337	1.02605	0.87178	1.01037	1.4303
ENSG00000271303	0.542877	0.812443	1.3822	0.914617	1.4264	1.09813	0.99837	1.34658	1.20352	1.6917	1.56309	1.04821	0.57783	1.92232	0.69414	0.980529	1.38122	0.67614	0.227472	0.543193	0.937761	0.751969	1.85016	1.51705	0.837223	1.29142	2.44408	0.980297	1.24518	0.300925	1.18757	1.83495	1.15518	1.80395	0.9922	1.417	1.3313	1.85935	1.1353	1.72076	1.65573	2.17722	1.18529	1.41221	0.987817	0.940431	1.32483	0.794109	1.29325
ENSG00000069849	6.7169	7.69609	7.35956	7.64783	8.06927	7.2364	7.0817	7.99856	7.32171	6.44324	7.74646	7.42358	6.83006	7.16651	6.38249	8.38352	8.79857	5.72921	7.31963	7.25234	7.79777	7.02742	7.70763	5.76461	5.73868	7.03657	8.15444	6.69536	6.68875	7.14593	8.04899	8.09042	7.67863	6.58515	7.34054	7.67831	6.77935	7.99645	7.43926	7.33431	8.62451	6.42565	7.33079	7.54253	7.31187	6.90019	8.51692	7.56701	6.52265
ENSG00000197454	0	0	0	0	0	0	0	0	0	0.0338424	0	0	0	0	0	0	0	0	0	0	0	0	0	0	0	0	0	0	0	0	0.0599655	0.0482322	0.03803	0	0	0.299917	0	0	0	0	0	0.021101	0	0	0.0272779	0	0	0.0612032	0
ENSG00000163218	1.90924	1.21559	2.20602	3.39315	1.28426	2.60913	0.571511	3.07492	3.68912	1.73966	1.42346	3.45929	1.02214	3.60124	1.41444	1.02864	1.36957	2.2204	3.28479	3.66022	2.66209	3.20868	1.4549	0.782341	1.58248	3.06797	6.09472	4.53546	4.81308	2.54623	4.22145	1.0284	3.55827	0.0544013	1.59952	2.10382	2.08536	4.0312	2.85068	2.46706	3.00065	4.65319	2.66549	1.25371	1.61675	0.866472	2.57927	2.55522	1.49447
ENSG00000173933	1.61307	2.55361	2.63336	2.02792	1.8197	1.85845	1.79939	2.20107	1.39716	2.21796	2.33408	2.13827	2.05753	2.20053	2.65191	1.39897	2.02891	2.77347	1.16404	1.80361	2.32072	1.5988	2.33332	2.067	2.04585	1.53727	2.06593	1.78527	1.5822	2.03259	2.48176	2.01591	1.89717	2.03327	1.65092	1.90315	1.4944	1.95783	2.14063	1.94263	1.92475	1.94084	1.90037	1.88881	1.81779	1.86871	3.28833	1.98888	2.04343
ENSG00000130749	2.88461	1.34048	1.35305	2.56287	3.30444	2.98181	3.6254	3.30791	2.3112	2.82949	2.94291	2.97277	3.32104	2.79744	3.55892	2.46752	2.88559	2.8484	1.36556	2.53581	3.18936	2.50043	2.93918	2.93613	3.1853	2.77922	2.42777	2.85942	2.76138	2.5564	2.86138	3.10439	2.85397	3.30293	2.67164	2.63721	3.11208	3.2809	3.45226	2.61372	3.63256	2.60535	2.96065	3.14628	3.26352	3.14841	3.4471	2.98202	2.90301
ENSG00000175984	0.706528	2.28894	1.7872	1.89784	2.4075	1.74578	1.14838	2.59234	2.86314	2.08849	2.47375	2.35841	0.370601	2.03543	2.09058	1.4343	2.93467	2.12373	2.66573	2.00934	2.36975	2.87319	1.43965	0.715171	1.7581	2.41158	2.54468	2.26599	2.15966	1.46281	2.62126	1.76588	3.31875	2.36998	1.76495	2.90562	2.5585	1.49018	2.65313	2.41736	3.22965	3.35378	3.36276	2.38516	1.94779	0.967422	2.81551	1.99036	2.13824
ENSG00000114978	4.30099	5.53172	5.52286	5.1278	4.76611	4.98408	5.35916	5.13839	4.42312	4.25692	4.59915	4.85659	4.72638	4.78101	4.72305	3.53679	5.21745	5.13705	2.86006	4.23475	5.0169	4.60843	5.24786	4.95486	5.12717	5.09272	4.68258	4.33088	4.18085	4.21828	4.29904	4.13373	5.575	4.56609	4.81993	4.81151	4.60031	4.56439	4.69988	4.64108	5.03508	5.21023	4.88264	5.0858	4.86437	4.9635	5.03617	5.13191	5.30593
ENSG00000006071	0.0362718	0.00297127	0	0	0	0	0	0	0	0.0118111	0.0106186	0	0.0277401	0.00489196	0.0056216	0.00743244	0	0.1242	0.0243126	0.066512	0	0.00366684	0.00408219	0.0106185	0.0303048	0.0543863	0.530141	0	0	0.00511372	0	0.257564	0.0106379	0	0.0037572	0	0	0.015927	0.00336465	0.00941009	0.209428	0	0.00338337	0	0.0450679	0.00446605	0.00641174	0	0.00806619
ENSG00000110811	4.27119	2.88263	1.51911	1.25712	2.1456	1.31878	1.10107	3.12537	2.85686	3.75695	1.4298	2.17532	3.33758	1.95127	1.22657	4.73069	1.51455	3.21011	2.23431	2.3868	2.07767	1.31954	3.49425	3.3874	1.7388	3.61986	1.41126	3.00359	3.15752	2.72641	0.744681	3.37244	1.1983	1.55363	4.13492	2.44269	1.49866	2.57313	1.33952	3.44632	1.8817	3.40655	2.53628	2.11157	3.09188	2.21278	2.15428	2.6882	2.98578
ENSG00000196867	0.390754	0.759823	0.0549837	0.99536	0.203945	0.0625312	1.24836	0.613249	0.238321	0.040909	0.585146	0.510594	0.657524	0.0697258	0.110609	0.574771	0.825901	0.278938	0.00594511	0.415859	0.652423	0.0594208	1.47887	1.32501	0.822539	0.578876	0.716673	0.354579	0.0530075	0.0728135	0.0801714	0.135424	0.196173	0.205842	0.667193	0.138181	0.0937873	0.316665	0.415312	0.37023	0.61584	0.427795	0.222287	0.971132	0.387803	0.228674	0.114035	0.144081	0.341426
ENSG00000157999	0.160501	0.122917	0.413145	0.457493	0.116691	0.0891131	0.390847	0.0975738	0.089896	0.48433	0.145645	0.0303003	0.236295	0.197263	0.116643	0.0396313	0.224543	0.345856	0	0.0515042	0.429521	0.0957393	0.279659	0.145643	0.263412	0.476423	0.0929034	0.519946	0.25137	0.131898	0.37983	0.465657	0.309691	0.120116	0.478933	0.537501	0.103708	0.47413	0.647606	0.277052	0.39452	0.0922579	0.281228	0.27327	0.245328	0.243547	0.148062	0.133718	0.324163
ENSG00000198034	8.27238	9.1771	8.81452	8.7253	8.78702	8.35753	7.3415	7.9202	8.09443	7.65792	8.57479	9.58479	9.20646	8.28215	8.10667	8.20721	7.74978	8.67574	8.07327	9.10964	7.77157	8.28161	8.66256	8.29954	9.47294	8.05181	8.85826	7.14446	8.74879	9.22212	8.27282	8.27774	8.00192	7.38669	7.95673	8.12133	7.59871	7.84486	7.28949	8.40762	7.2303	8.19547	8.13634	8.54374	7.56756	8.50933	8.30107	8.20455	7.84631
ENSG00000170043	7.04223	6.88825	7.14527	6.00485	6.20303	6.00356	5.63937	5.74222	4.9796	6.35408	6.41485	6.13584	5.59589	5.8317	6.09329	6.90207	5.86027	5.14156	6.30258	6.07054	5.25282	6.01688	5.26346	5.55311	5.51152	5.49119	5.61833	5.61223	6.14344	6.77586	6.0037	5.54168	5.47127	6.17809	5.59767	5.73863	5.94651	5.61466	5.49936	5.51836	5.69043	5.59446	5.61234	5.81001	5.72442	5.94368	5.49587	6.75497	6.39776
ENSG00000144152	1.49451	0.302964	1.29151	0.28352	1.21217	0.458345	0.491321	0.442326	0.91268	1.57877	0.302682	0.8259	0.782538	0.686145	0.633327	0.763154	0.483236	1.48873	0.254145	0.90161	0.35868	0.30262	1.34242	0.530099	0.373275	1.37173	0.156258	1.17254	0.394097	0.572037	0.145379	0.922492	0.920086	0.395314	1.1276	0.519929	0.416509	0.485783	0.436875	0.684242	1.4191	0.756893	0.444114	0.811616	0.945908	0.514086	0.813347	0.933085	1.99244
ENSG00000095203	0.389309	2.41153	1.19083	1.67195	1.15951	0.173499	1.78903	1.65571	2.06989	1.62647	2.51005	0.943152	1.13365	1.57867	0.943827	1.19724	2.26612	1.58033	2.44771	1.87926	3.20171	1.48408	2.03585	1.51597	1.81374	2.10966	3.30013	1.19081	2.25176	1.84167	2.77014	1.40437	3.0861	1.79539	1.88438	1.73009	1.7089	3.25577	2.08268	1.15767	1.5588	1.78639	2.48885	2.22232	1.34872	1.58386	0.210516	1.96568	1.61634
ENSG00000100354	0.984641	0.910535	0.356513	1.14409	1.06335	1.24296	2.36292	2.53931	1.38727	1.35283	1.62716	1.17679	1.31484	1.04445	1.52492	1.4074	1.73458	1.64836	0.636374	1.16381	1.33815	0.92179	2.19364	1.29015	1.51368	1.7539	1.30141	1.77278	1.21504	0.792214	1.13467	1.99231	1.49112	1.87267	1.88273	1.21849	1.72835	1.93392	1.86928	1.51197	1.95338	1.46754	1.5155	1.89198	1.90055	2.33476	1.5771	1.50286	1.20825
ENSG00000259040	0.143426	0.0242172	0.0180968	0.0548365	0.00922397	0.0296865	0.0590879	0.0441514	0.0520161	0.043167	0.0571903	0.0682975	0.078325	0.049437	0.0342754	0.232585	0.0495868	0.0983669	0.0249477	0.352436	0.0210081	0.0149948	0.0331809	0.0288782	0.0539838	0.178149	0.419655	0.175102	0.0740891	0.0516422	0.084534	0.0344547	0.0431813	0.0833734	0.0604932	0.0431039	0	0.0163443	0.0542831	0.0755059	0.0183888	0.0358195	0.0343537	0.0283528	0.0836662	0.0362669	0.0326054	0.0118042	0.043611
ENSG00000189120	2.19772	1.11726	0.833873	1.9917	1.77701	1.82987	0.741474	0.564085	1.95322	1.50471	0.895402	1.32529	1.93565	2.25518	1.64915	1.90491	1.18292	1.6272	2.94477	1.49375	1.50101	3.34544	0.676776	2.10337	0.888944	1.77446	0.446229	1.86198	2.07125	1.35238	1.48262	1.17463	1.54766	0.706685	2.74215	2.43049	2.45601	2.26413	1.31692	2.98663	1.91659	2.63097	2.73865	1.18709	2.25113	1.88438	1.47216	1.36611	2.50628
ENSG00000158623	3.22323	1.64632	3.71584	2.75681	2.98143	2.80307	2.95699	3.77916	3.07879	2.73887	4.15735	2.76854	3.8288	3.66836	3.93567	2.3583	2.66712	3.46431	2.53279	3.42726	2.2308	2.4673	3.05778	3.57774	3.62898	2.58952	3.71814	3.80782	3.77014	3.31118	3.09813	3.72475	3.44849	3.44255	2.76806	2.29618	3.47529	3.00388	2.80406	3.48705	3.76564	2.74468	3.30478	4.3054	2.7251	4.28551	3.62128	3.884	3.69673
ENSG00000145839	0	0	0	0.148253	0	0	0	0	0	0.0269495	0	0	0	0	0	0	0	0.165176	0	0	0.0388826	0.0415046	0	0	0	0	0.0664771	0	0	0	0.0478395	0	0	0	0	0	0	0	0	0	0.131669	0	0	0	0	0	0	0	0
ENSG00000114812	0.530118	0.0770803	0.523524	1.44561	0.643559	0.328456	0.601448	0.317505	1.59858	1.69715	0.391692	0.594026	1.14871	1.45241	0.9606	0.550541	0.777454	0.844886	2.2928	1.60783	0.81092	1.77995	1.23421	0.961315	0.477315	1.75131	1.75931	0.529258	1.17302	0.241875	3.38323	1.3795	1.96189	0.187682	0.744175	1.32505	0.549029	2.17489	1.20627	0.786451	1.91042	0.918363	0.434352	0.723729	0.875771	1.42023	0.924063	1.40476	1.02343
ENSG00000139618	0.332421	0.748234	0.698826	0.992916	1.0675	0.361025	1.64599	1.28858	0.416552	0.941624	0.357843	0.761818	0.872582	0.703461	0.98627	0.240173	1.22788	1.698	0.123223	0.428879	1.05841	0.452313	0.747741	1.78115	1.40843	0.807071	1.27726	0.580904	0.325877	0.562209	0.697618	1.02058	0.775857	1.30705	0.839313	0.653093	0.870451	0.572784	0.905347	0.653904	1.43558	0.634459	1.5703	0.853894	1.13587	1.09092	1.22083	0.63776	1.06844
ENSG00000169313	0.092623	0.0842479	0.10899	0.0488035	0.629337	0.38707	0.184141	0.0666931	0.0613937	0.0341842	0	0.0103154	0.0402806	0.0697527	0.244952	0	0.259046	0.218962	0.0221776	0.895408	0.0124753	0.0525761	0.029506	0.147616	0.158462	0.149187	0.042621	0.197483	0.0167816	0.0185581	0.045661	0.141477	0.0193346	0	0.318694	0.0879351	0.0824235	0.112298	0.129145	0.380971	0.135843	0.103559	0.0122979	0.225538	0.613786	0.29406	0.112634	0.121091	1.56015
ENSG00000165389	3.92301	5.81227	5.59891	6.54297	4.51511	4.36395	3.48423	4.21227	4.10395	4.58553	5.4629	4.478	3.40215	5.061	5.00936	4.86702	4.83453	4.23265	5.9408	4.30171	4.39786	5.20588	5.67486	3.31458	3.04504	4.1398	5.75755	5.42193	3.92228	5.17429	5.24314	4.22522	4.8671	4.23408	3.60904	4.66583	3.73728	3.29264	4.18854	3.73493	4.34701	4.30937	3.97211	3.741	3.46922	5.29001	3.50113	4.95579	4.46012
ENSG00000134698	1.73873	0.599644	1.16278	1.75551	1.5606	1.00438	2.04768	1.87213	1.39566	1.79892	2.02774	1.42203	1.82837	0.724753	1.75301	0.841957	2.01534	2.55661	0.662241	1.73109	1.46095	1.3771	2.36661	1.67197	2.11726	2.09916	1.61507	2.06687	1.50169	1.17538	1.32343	2.55055	1.60069	1.8205	1.96318	1.78398	1.6859	1.96983	2.29163	1.62259	2.37326	1.67499	1.54949	1.71043	1.88683	1.45006	1.85326	1.56188	1.91917
ENSG00000166788	2.88285	3.27977	2.85568	2.43191	2.23197	2.95894	2.02864	1.94153	1.6633	2.12474	2.45126	1.99777	2.64993	2.00527	2.68685	1.4775	2.5734	3.29503	1.40652	2.20669	2.73293	2.42225	3.00796	2.68752	2.25661	1.65477	3.46471	2.12396	2.54745	2.02336	2.2145	2.68787	1.94228	2.1016	1.48647	1.59312	2.12328	1.96053	2.24724	1.85977	2.60562	2.12344	2.57176	2.01123	2.16335	1.71044	2.56846	1.75575	2.21263
ENSG00000145391	2.26569	2.84289	1.92901	2.58035	2.46788	2.73765	3.42111	2.88331	3.40807	2.49848	2.59822	1.67025	2.68281	2.34568	2.35153	2.36484	2.26931	2.62519	0.963373	2.29669	3.71742	2.19214	3.08505	3.61613	3.22781	2.71677	2.45207	2.43967	2.85369	2.1662	2.44519	2.82076	2.88492	3.95119	3.06859	3.38972	3.06766	3.35676	3.12672	3.92433	2.68847	3.03488	3.33786	3.19466	3.59519	2.74105	2.58694	2.13583	3.22215
ENSG00000213999	0.512876	0.0216549	0.0791366	0.216014	0.0959429	0.07823	0.320775	0.099487	0.0312061	0.156489	0.228483	0.740985	0.312781	0.103998	0.174888	0.0536513	0.672266	0.255762	0.18935	0.199537	0.143833	0.177186	0.553533	0.425675	0.244782	0.15003	0.202648	0.16337	0.248917	0.176624	0.202831	0.650819	0.130939	0.145744	0.144317	0.183297	0.128217	0.192199	0.269672	0.183973	0.297725	0.201292	0.207904	0.226781	0.541849	0.170037	0.113279	0.160194	0.067615
ENSG00000187474	2.70158	2.1134	2.49919	1.33948	3.504	3.78179	2.40131	2.74548	4.0295	0.953581	1.18681	2.01828	2.43183	1.966	2.61953	1.45568	1.91987	2.69373	0.762184	3.41831	1.36646	2.30784	3.11947	3.49003	2.94894	3.94813	0.239973	1.84095	1.2563	2.05371	2.07244	3.63174	1.91408	0.875512	4.93659	2.31962	3.78579	2.88338	3.42339	4.91043	1.59555	2.84574	2.41069	2.02792	4.83545	3.84681	2.50255	3.15025	5.46397
ENSG00000278961	0	0	0	0	0	0	0	0	0	0	0	0	0	0	0	0	0	0	0	0	0	0	0	0	0	0	0	0	0	0	0	0	0	0	0	0	0	0	0	0	0	0	0	0	0	0	0	0	0
ENSG00000074582	3.07631	3.44302	3.08846	1.69598	1.9219	2.30591	2.82662	2.49288	1.49657	3.10462	3.07028	2.9418	3.22667	3.00319	2.45819	2.86981	2.39664	2.99354	2.52711	3.04622	2.46716	1.88172	2.51255	2.90219	3.1441	2.65734	2.83853	2.45795	2.78581	3.53942	2.31458	3.25551	2.81144	2.36557	2.29188	2.4723	2.44992	2.74427	2.69805	2.51078	2.37601	1.86752	3.233	2.69793	2.72043	2.58053	2.82012	2.33064	2.02647
ENSG00000163950	4.43708	5.37387	5.00569	4.31395	4.57032	5.19781	5.39491	4.58072	3.37953	3.96835	4.8772	4.76337	4.9968	5.36351	5.31727	5.22529	5.70145	5.75388	4.32327	4.9921	5.35655	5.01562	5.13139	6.40343	5.77717	4.43818	4.96575	4.72924	4.35196	4.88953	4.32841	4.0842	4.74813	4.59537	5.42002	3.34144	4.34547	4.56856	4.23464	4.8562	5.6317	4.17238	4.61992	4.56412	3.86148	4.56841	4.66046	4.45429	4.56773
ENSG00000116455	3.77611	4.06414	3.6371	3.58021	2.93726	3.57426	4.05747	3.84693	3.1062	3.90383	4.40405	3.46208	3.6694	3.95139	3.83911	3.64543	3.91176	3.9904	2.90072	3.5803	3.44395	3.30179	4.1095	3.779	4.09215	3.47491	3.45751	3.66227	3.27454	3.14583	3.06464	3.29992	3.9566	4.16889	2.9243	3.59164	3.48445	3.37785	3.7049	3.30933	3.53362	4.10866	3.47603	4.25989	2.75914	3.60708	4.54365	3.66757	4.09818
ENSG00000181350	0.443911	0.188942	0.253097	0.372146	0.438692	0.148449	0.815297	0.172429	0.16388	0.290629	0.361292	0.162386	0.559391	0.349533	0.147211	0.155355	0.149743	1.34346	0.097805	0.304416	0.132414	0.153207	0.694692	1.6861	0.595585	0.435476	0.258344	0.0522798	0.27026	0.168331	0.0534573	0.366729	0.0809274	0.220827	0.78834	0.47818	0.321145	0.461235	0.325045	0.282227	0.372089	0.129092	0.26595	0.384118	0.35765	0.255041	0.166791	0.295837	0.326183
ENSG00000106399	3.45843	5.41708	5.05038	3.86879	2.91203	3.27135	2.71364	2.64961	2.06919	3.0738	2.49504	2.95618	3.24252	3.23676	3.12043	4.22199	3.48001	4.14814	2.97959	3.06184	3.2199	2.81807	2.62247	3.30936	3.32488	2.7695	3.65906	2.58734	2.23513	2.70113	2.27895	2.67649	3.16072	2.68779	2.01457	2.30006	2.08136	2.25266	2.37889	2.92098	3.13786	2.10588	2.22595	2.32035	2.25595	3.4153	3.23373	2.8291	2.42284
ENSG00000106692	0.878083	2.22746	2.20287	1.39643	1.9181	1.64993	2.03239	2.20536	1.14892	1.40654	1.32451	1.69545	1.90148	1.35573	2.05186	1.02361	1.78804	1.90825	0.434423	1.18529	2.23282	1.38798	1.44321	1.79091	1.62827	1.90212	1.94827	1.18474	0.97382	1.31223	1.43395	1.90397	2.28548	2.53516	1.6009	1.65474	1.5415	1.87294	1.8765	1.78353	2.23705	1.56987	2.41982	2.28511	1.77448	1.95337	1.73896	1.7959	1.80008
ENSG00000155729	1.76024	2.26084	2.05178	1.9053	2.38128	1.51835	2.14008	1.82664	1.23499	2.03858	2.12271	2.21146	1.88074	1.27178	1.70068	1.16768	1.66587	2.55646	0.447072	1.99075	2.42106	1.23768	1.60025	2.07465	2.24816	2.20613	2.48214	1.65059	1.7249	1.33788	1.83769	1.80894	2.07289	1.59696	1.9801	1.80708	1.65278	2.25623	2.14286	1.86676	2.34459	1.77668	1.72905	1.85655	1.90391	1.33464	2.15548	1.82557	2.02944
ENSG00000153048	4.07408	4.84849	5.55459	5.56865	5.32799	4.86052	4.46474	5.2211	5.39	5.18686	5.82538	5.06677	3.50415	5.12343	4.31979	3.65685	4.90802	3.99779	6.40339	4.77362	3.65401	5.38197	4.21678	4.51468	4.73716	3.09563	3.48018	3.86365	5.28561	4.91084	5.10371	3.60091	4.78633	5.33852	3.54875	4.52655	4.09558	3.97384	4.38981	4.02249	5.01239	4.96141	4.57858	3.65029	3.93618	4.70219	4.39118	3.95287	4.65283
ENSG00000103449	0.721584	0.398881	0.062376	0.258071	0.0425537	0.178104	0.0964029	0.329304	0.545272	1.44192	0.0624437	0.139265	0.620162	0.186876	0.00672943	0.234233	0.0146412	0.650739	0.0146066	0.122723	0.0683153	0.0347519	0.44687	0.0169175	0.664193	0.765797	0.014138	0.402956	0.111965	0.112089	0.0151571	1.52798	0.110717	0.560065	0.551189	0.395643	0.118386	1.67961	0.304365	0.276896	0.0599186	0.535808	0.360625	0.18476	0.56071	0.0422279	0.114603	0.125738	0.358392
ENSG00000167434	0.0145986	0.0965014	0.185941	0	0.0125505	0.0269848	0.0405066	0.0173448	0.194686	0.0132041	0.086743	0	0.509369	0.0271473	0.0156645	0.0103807	0	0.0316511	0.0505241	0.0269376	0.00957709	0.0102299	0.0113857	0.123681	0.0421943	0.0672853	0	0.0101087	0.0128874	0.0142537	0	0.0467344	0.00744466	0.18278	0.0104814	0.086743	0.0457334	0.0549187	0.0912451	0.04334	0.00837886	0.0644131	0.0557395	0.282484	0.122644	0	0.026704	0.0319356	0.0298463
ENSG00000105419	3.33584	2.05159	1.69864	1.33304	1.28137	0.865557	0.374587	0.552386	1.50363	2.41577	1.3043	0.539198	1.89655	0.948912	0.483177	2.03551	0.379149	2.03816	0.496142	0.986332	2.16954	2.29172	1.8889	0.932923	0.859685	2.01802	0.504842	1.61971	1.39308	1.22019	0.619984	1.46178	0.443518	1.54902	2.37648	1.60711	0.902125	1.61712	0.867883	2.08264	0.836421	2.17184	1.83949	2.19292	2.03328	1.05877	1.20328	1.91355	1.34807
ENSG00000172432	3.93437	3.91944	4.51268	4.3016	3.86098	3.39526	4.18674	4.50987	3.57433	3.44913	3.88253	3.82736	4.09219	3.17248	3.86992	2.15949	4.13933	4.45281	2.92749	3.77255	4.05161	4.36453	3.94916	3.00044	4.347	3.814	3.6136	3.85413	4.07281	3.59595	4.50772	4.30611	3.70086	3.84623	3.25619	3.5263	3.55107	3.88978	3.6042	4.2378	4.15825	3.46089	3.739	4.46841	3.49165	3.31712	3.33557	3.77535	3.97974
ENSG00000173950	2.53134	2.89691	2.41222	3.58796	3.96755	3.12621	3.10739	2.44269	2.55111	3.07361	3.91457	2.48147	3.87716	2.75585	2.90914	2.62484	3.22719	3.20591	1.63119	2.5291	3.07233	2.15603	4.00464	2.55164	2.85622	2.97797	3.19233	3.11913	2.68449	2.13441	1.76633	3.61598	2.3463	2.20528	3.08346	2.48801	2.20878	2.56665	2.44555	2.95802	4.63002	3.28994	2.54449	2.94896	2.49459	2.15506	3.97567	3.39563	2.48952
ENSG00000150893	0.0643158	0.0123736	0.0184149	0.00189478	0.0168522	0.00609205	0.00612515	0.0219933	0.00716912	0.0226146	0.00887829	0.0569876	0.116839	0.169773	0.151755	0.0338462	0.0237625	1.21011	0.233567	0.232167	0.0100154	0	2.23653	0.0103526	0.0253664	1.04219	2.39234	0.018075	0.425698	0.00640669	0.204521	0.0225343	0.292723	0	0.197968	0.103095	0.0055436	0.581365	0.370343	0.259244	0.160264	0.0352451	0.143999	0.225098	0.1119	0.0852644	0.0279185	0.017981	0.188741
ENSG00000090372	4.00751	2.74974	3.1286	3.98234	3.91436	3.6371	4.58633	3.64136	3.38815	3.77392	4.05031	3.57087	3.85899	3.91078	3.64801	3.14841	3.75458	4.14284	2.78545	3.23274	4.20312	3.87846	4.36584	4.27022	3.74667	3.74993	3.41833	3.88718	3.53328	3.82245	3.25524	3.9436	2.87516	3.81882	3.80544	3.62489	3.63662	3.59373	4.08042	3.43766	4.09388	3.78272	3.88511	3.94409	3.66624	3.87414	4.20029	3.64093	3.7011
ENSG00000160183	1.51814	0.1097	0.471562	0.10479	2.41397	0.282497	0.712112	0.274754	0.027208	0.351218	0.295209	0.111208	0.485303	0.0964615	0.110339	0.0739232	0.094913	2.00977	0.0218549	0.245676	0.185127	0.509557	0.0242719	1.61272	0.838387	0.49461	0.0693439	0.175669	0.0328864	0.458588	0.0934105	0.273439	0.00955793	0.0110845	0.277804	0.332852	0.436285	0.101805	0.558312	0.0983231	0.776891	0.0451299	0.067362	0.0748638	0.223832	0.157171	0.394739	0.047609	0.383361
ENSG00000129911	3.43556	1.83885	2.71622	3.35955	3.11227	3.29292	2.83026	3.33389	2.71191	3.56353	3.96354	3.79814	3.26888	3.99274	3.67437	4.65015	4.0398	2.60899	2.93663	3.16135	4.25556	4.16885	3.90249	3.41086	3.09236	3.38385	3.75552	3.66777	3.70833	4.12737	3.06178	3.53377	3.62772	4.05954	3.197	2.78237	2.80245	2.99925	3.10878	2.60961	2.46467	3.09465	3.46167	3.31547	3.0302	3.00472	3.11309	3.06159	3.02154
ENSG00000157399	2.13492	0.684303	0.148762	0.0931185	0.270292	0.232567	0.720316	0.0786496	0.698183	0.519707	0.165799	0.205339	1.63589	0.692384	0.392453	1.7896	0.172548	1.31519	0.201752	0.680967	1.64436	0.245859	0.559548	1.41695	0.566759	0.914306	0.0413144	0.518357	0.154922	0.694955	0.0682785	0.769225	0.182796	0.135658	1.541	0.418313	0.0909955	0.990542	0.143368	1.43592	0.663386	0.484384	0.460496	1.48721	1.02858	0.302944	1.13823	0.321685	0.757904
ENSG00000136104	2.20163	2.52159	2.45332	1.52081	2.05135	1.68409	1.68707	1.56809	0.975306	1.45818	1.1674	2.14145	2.37719	1.77002	1.61182	1.73378	1.73019	2.19557	0.539015	2.08741	1.83279	1.41927	2.05842	2.69596	2.22254	1.79313	1.84832	1.08706	0.897602	1.4925	0.901317	1.37232	1.04258	1.44726	1.7337	1.96334	1.15458	1.48862	1.55282	1.43709	2.14214	1.60703	1.64254	1.47833	1.48374	1.5419	2.19792	1.60842	1.79734
ENSG00000140391	4.26314	3.8592	3.82567	3.82853	4.87628	4.73832	2.89011	3.78566	3.34065	3.66069	4.36873	3.94058	4.63716	2.70339	3.9176	3.80223	3.83735	4.92397	2.41144	4.058	3.39359	3.76525	3.62439	4.62537	3.80228	4.07415	3.9976	3.05273	3.64346	3.45713	3.39285	4.44148	3.89139	4.0233	4.01941	4.41975	3.26857	3.82535	4.29895	3.94362	3.77416	3.51401	4.17362	4.01321	3.65797	3.50891	4.27425	4.10326	4.01532
ENSG00000101544	1.66693	2.64056	2.04605	2.69223	3.49139	2.40508	3.8179	3.26371	2.68806	2.05325	2.27939	1.63679	2.82154	1.93381	3.07815	1.69584	3.15214	3.42469	1.3277	1.91366	2.99601	2.84967	3.024	3.47393	3.87478	2.80321	2.94777	2.57468	2.26573	1.67314	2.97216	2.95466	2.57596	2.99539	2.7348	2.73835	2.93906	2.75122	2.78608	2.22667	3.44877	2.97709	2.83722	3.35383	2.94889	2.83535	2.75831	2.29928	2.68092
ENSG00000091592	2.99662	1.08439	1.58561	2.30165	1.78755	1.22153	3.22544	1.03611	1.30831	2.0897	2.4068	2.41176	3.25083	1.68379	2.07194	1.27173	1.92798	2.48711	2.09322	2.02417	2.12785	2.69268	2.28755	2.27742	1.5841	2.7508	0.319685	2.07829	2.04665	2.59135	2.61901	4.4318	1.96246	2.88504	2.28663	1.73496	2.37745	2.30334	2.07473	1.44848	2.50072	1.56479	2.39114	1.98905	2.15408	1.0124	1.46631	2.25915	2.38683
ENSG00000065923	1.20462	1.97315	0.904893	2.29137	2.00444	1.52575	2.83756	2.02236	2.01704	1.6288	2.04818	0.506042	2.82008	1.14956	1.37173	1.52383	1.42649	2.60034	1.20719	1.39015	0.164385	0.943539	1.05899	3.34074	2.4682	2.06873	1.28951	2.44154	0.910855	1.7435	1.4008	2.33687	0.257002	2.15464	1.9924	1.41606	1.99457	1.28904	2.23042	1.26565	1.47737	1.12183	0.855159	1.65669	1.37589	1.3564	2.75401	1.54049	1.89171
ENSG00000106477	0.863991	0.804199	1.06323	0.684744	0.722972	0.662417	1.19932	0.591005	0.560569	0.663134	0.69743	0.732364	1.19278	0.835229	1.04213	1.25461	0.573893	0.291514	0.284177	0.597055	0.450136	0.652981	0.789977	0.867757	1.06097	1.17743	0.900861	1.17377	0.621343	0.772866	0.526896	1.225	0.705519	0.764069	0.633546	0.467312	0.623422	0.657931	0.837659	0.566785	0.340609	0.504233	0.840175	0.807317	0.626138	1.75692	1.04147	0.267848	0.841037
ENSG00000261732	0.0132945	0.0262561	0.0607972	0.0566269	0.0114286	0	0.0247162	0.0118637	0.00364398	0.0764221	0.0268748	0.0532081	0.0797373	0.0247316	0.0213457	0.0235151	0.0258316	0.0144914	0.0232145	0	0.00872015	0.00931476	0.0511084	0.0179718	0.0431933	0.076317	0	0.0807987	0.0175677	0.0065047	0.0372963	0.100206	0.050076	0.0408049	0.0237422	0.0268748	0.0126332	0.059884	0.0751719	0.00798762	0.0340166	0.0149128	0.0128748	0.0350741	0.00967743	0	0.0243274	0.00732973	0.0136604
ENSG00000138617	2.09028	1.93824	1.58625	2.02923	2.42257	1.67901	1.79023	1.72957	1.01869	1.32873	1.56064	1.58153	2.78386	1.64984	1.69452	0.860085	1.52107	2.47358	0.821653	2.03527	1.48276	1.53558	1.9346	2.37371	2.56056	2.10243	1.85824	1.61136	2.67235	0.965204	1.23367	1.39182	1.23491	0.601255	1.7747	1.5092	0.856936	2.07215	1.54028	1.825	2.53985	1.67006	1.76871	2.41196	1.49757	1.52224	1.62882	1.71617	1.32211
ENSG00000182983	0.944018	0.251176	0.0351493	0.887106	0.393199	0.0791809	0.107214	0.123842	0.114177	0.0344657	0.41769	0.144365	0.382573	0.131403	0.059017	0.133131	0.213403	2.32545	0.125494	0.820429	0.636064	0.0482672	0.463428	0.735506	0.0988885	0.940176	0.0235972	0.385068	1.81309	0.0734333	0.407303	0.264823	0.174564	0.0844346	0.39752	0.318348	0.115237	0.96607	0.484967	0.439112	0.952854	1.19235	0.27911	0.423575	0.455428	0.0757159	0.11948	0.257373	0.333246
ENSG00000033030	1.6451	1.75492	1.49703	2.00375	2.07458	1.30491	2.01037	1.82464	1.2087	1.52731	1.77644	1.82896	2.05824	1.44187	1.56019	0.650812	2.1168	1.98685	1.31304	2.02138	1.99815	1.80123	1.6515	1.66812	2.14847	1.91204	2.34466	1.59932	2.1073	2.09733	1.76	1.95335	2.00165	1.98325	1.53994	2.3015	1.86161	1.9883	1.89422	1.45712	2.12163	1.3382	1.55281	1.76412	1.69961	1.94347	1.71021	1.34782	1.88056
ENSG00000177425	2.28853	3.05988	3.00252	3.21204	2.39062	2.45555	2.81392	2.39584	1.91654	1.91407	2.528	2.01964	2.92573	2.37598	2.66988	2.32828	3.03259	2.51414	1.95249	2.73675	2.99676	2.82293	2.49994	2.59373	2.80783	2.83634	2.95908	2.75947	3.05858	2.59041	3.55651	2.32744	3.71647	3.93365	2.13128	2.66739	2.32884	3.73535	2.70256	2.42501	2.62088	2.59748	2.37724	2.82981	2.11598	2.59439	2.23704	2.90479	2.87048
ENSG00000215187	0.442941	0.153203	0.145778	0.0870002	0.282279	0.159307	0.399029	0.0750848	0.135107	0.0574306	0.133986	0.159208	0.217909	0.264669	0.132825	0.140211	0.477927	0.160362	0.0593271	0.899764	0.175609	0.138263	0.356109	0.165623	0.177712	0.198638	0.266793	0.18479	0.231903	0.0978374	0.213822	0.444296	0.286138	0.15233	0.270375	0.0517138	0.140682	0.810703	2.11173	0.255767	0.282271	0.0429959	0.188011	0.308978	0.0554602	0.0435316	0.548039	0.24834	0.221804
ENSG00000157800	1.75188	1.3914	1.90979	1.28674	2.06436	1.08079	2.45723	1.84471	1.90459	1.54218	1.54909	1.85622	2.06362	1.51884	1.74711	1.95049	1.39226	1.98138	0.897008	1.56087	1.29643	1.98733	2.26418	1.92165	2.13996	2.40703	2.0451	2.44097	1.85647	1.81686	1.61121	2.08907	1.89371	2.08429	1.95901	1.66191	1.7039	1.65194	1.90585	1.88066	2.13282	1.94283	2.1706	2.50257	2.27023	1.61268	1.72666	2.18785	2.22544
ENSG00000170275	4.73032	5.09642	5.05035	4.09037	4.13349	4.81465	4.08226	4.06474	4.31043	4.10617	3.69476	3.98296	4.13705	4.4099	4.56656	3.9817	3.85036	4.01601	2.47942	4.09973	3.99973	4.54936	4.68463	4.71047	3.90081	4.60707	4.60356	3.90242	3.64204	3.53442	3.75109	4.36706	3.9031	4.11061	4.8889	3.82532	3.60984	3.98682	3.48452	4.80173	4.19338	4.1946	4.56251	4.53378	4.48616	4.3144	3.93369	4.57317	4.49933
ENSG00000089163	1.10429	0.631236	1.00446	0.718571	0.699496	1.1729	0.574854	0.645072	0.193194	1.44063	0.332863	0.511706	1.03934	0.480922	0.333266	0.471717	0.462531	0.976722	0.810749	1.00678	0.411747	0.645817	0.744868	1.12979	0.585357	0.604905	0.935278	0.401411	0.122997	0.539026	0.389363	0.713725	0.597531	0.342472	0.519961	0.785673	0.357393	0.772382	0.332301	0.298516	0.74991	0.19809	0.822416	0.70737	0.899451	1.12868	0.374587	0.908343	0.602464
ENSG00000123384	4.40568	2.27889	1.81972	3.89039	4.59867	3.00431	4.7839	5.56479	5.07099	3.91	3.75104	3.04408	4.25483	3.78195	3.60898	3.51847	3.65077	2.96751	3.28995	3.24353	3.85812	3.26741	4.93285	3.47212	3.62343	5.57498	2.31344	4.2868	3.74062	2.96608	3.66392	5.00721	4.09153	4.15724	5.79182	3.79041	4.79509	5.03792	4.11681	5.63076	4.97447	4.40844	4.7365	4.6326	5.85189	3.84142	4.8315	3.75257	4.82029
ENSG00000066654	2.51736	3.01096	2.9578	2.97501	2.77041	2.76922	3.32658	3.76196	2.47106	2.87706	3.10619	2.4	2.67012	2.38858	3.55807	2.37204	3.02219	2.88249	1.40368	2.94693	2.62409	2.82111	3.30047	3.18004	3.31985	2.92754	2.75889	3.01246	3.04864	2.5576	3.07238	3.24715	3.41703	3.01231	2.94731	2.60032	2.96656	3.49154	3.31486	2.83025	2.73115	3.03753	3.09765	3.67161	3.05803	3.3827	2.83222	3.22594	2.83636
ENSG00000163331	3.65882	3.25712	2.01169	3.1338	3.88253	4.82815	4.5955	2.35893	1.55685	1.37403	3.11121	2.81296	2.75369	2.46675	1.30859	7.35853	6.03533	3.53441	4.65348	3.86784	1.25329	1.07844	1.78133	4.66412	3.04507	3.11291	5.22378	2.53932	0.300104	0.684987	3.94656	3.07087	2.33382	0	3.63541	3.06225	0.863639	2.71137	2.36561	5.69949	4.3532	0.779907	1.31671	3.11211	0.630235	0.152775	6.23289	0.509538	1.57025
ENSG00000106868	1.49325	2.21764	1.80366	1.27623	3.09236	2.04393	1.85744	1.51469	1.48377	1.77691	1.4603	1.68972	1.7683	1.30743	1.2076	0.691663	1.37652	2.35181	0.802011	1.05745	1.19722	0.847989	1.81774	1.42213	1.11163	1.88925	1.19695	1.50677	1.08266	1.07362	1.39459	2.27463	1.79135	1.63845	1.7869	1.74595	1.21036	1.6857	2.31948	1.91091	1.87839	1.26642	1.96733	1.26717	1.88227	1.4506	2.05701	1.47688	2.58708
ENSG00000162733	1.9289	1.4159	0.571004	0.634491	0.82519	0.896531	1.10532	2.1372	2.59397	0.470199	0.535597	0.863367	1.99634	1.06791	1.03432	1.18425	0.494588	1.84961	0.267805	1.55448	1.89604	0.777168	2.07298	0.429615	1.44614	2.72256	0.312146	1.88023	1.24753	1.15069	0.478911	2.25204	1.33975	1.77172	3.3284	2.00581	1.43667	2.62932	1.7164	3.33564	0.728231	2.58468	2.47527	2.26272	3.29198	2.20462	1.27134	2.05581	2.38778
ENSG00000186710	0.296937	0.123079	0.0173151	0.0177119	0.439198	0.119258	0.0749443	0.128854	0.0443458	0.0902616	0.120393	0.362847	0.306076	0.0566049	0.0648764	0.0289697	0.137958	0.208838	0.0932077	0.245232	0.189424	0.0840136	0.0932415	0.219574	0.143005	0.380429	0.0458536	0.0830429	0.0709476	0.0783047	0.0809619	0.267177	0.351742	0.071192	0.0860258	0.231508	0.0638241	0.565136	1.57558	0.206877	0.552152	0.067767	0.0902331	0.0747205	0.0871983	0.0174593	0.188948	0.0556028	0.0621703
ENSG00000033170	2.50131	3.2235	2.98678	3.25366	2.19183	1.60521	2.01157	2.02259	1.26498	1.45491	0.651196	1.6035	2.15469	1.98371	2.23896	1.67916	1.73153	4.10589	0.44472	1.98028	0.812818	1.44758	2.31662	2.19447	3.02986	3.12236	2.4845	2.61674	0.569201	1.50548	1.18829	2.96288	1.49632	0.932757	2.41601	1.81293	1.76175	1.9573	2.01942	2.66653	1.81486	2.18834	2.31711	1.85265	3.16883	2.39404	1.63113	3.48482	2.19027
ENSG00000005022	7.50155	9.48091	8.45271	8.62853	8.09028	8.56846	8.26643	7.68879	8.07232	7.72443	8.57297	7.75251	7.82793	8.51319	8.18739	8.37137	8.59313	8.44226	7.74541	7.99769	7.97394	8.17116	8.68544	7.34139	8.76483	7.43087	8.19218	8.47802	8.47283	8.0663	8.0239	8.52993	8.31945	7.16697	8.05978	8.40389	8.14314	8.02214	7.78275	8.87459	8.18378	8.1062	8.23018	8.11801	7.80681	8.36531	7.94219	7.67784	7.80391
ENSG00000169035	6.14848	3.51929	1.51066	6.43246	3.54017	4.8045	1.32364	3.35173	8.48287	3.50831	4.53544	3.18938	1.82633	5.21311	4.43603	2.84927	4.40982	6.28238	8.28159	5.87755	6.26545	2.53726	2.65954	0.185415	0.161213	4.24947	5.63243	4.68122	7.46385	5.83779	6.1814	4.28342	5.21264	1.016	4.33212	6.86661	5.63378	6.18485	5.06878	5.18374	5.41524	7.5581	6.30465	1.3326	6.2493	2.62364	3.97424	4.85424	6.46694
ENSG00000118482	2.2198	1.67389	2.42212	2.76152	2.71708	1.62466	3.08671	2.79252	2.03174	3.08988	2.57995	1.95099	2.73391	2.23613	3.15373	1.45452	2.91461	3.45319	0.923184	2.32745	2.85254	2.49924	4.13615	2.72876	3.2377	2.51457	2.20621	2.74251	2.00647	1.93446	2.46158	3.58939	2.42481	2.48536	2.86483	2.46026	2.17941	2.72302	3.18403	3.87879	3.22212	2.59592	3.05378	3.46408	2.96015	3.31648	3.10823	2.63907	3.22706
ENSG00000275591	0.0349215	0.0395252	0.0699882	0.0182262	0.467891	0.00654712	0.761392	0.00419759	0.0191845	0.0594727	0.0190189	0.0451886	0.210305	0.0131437	0.00756857	0.0923522	0.0381215	0.262427	0	0	0.0046223	0.00493796	0.0698776	0.416914	0.104435	0.0884933	0.165906	0.0290316	0.00622371	0	0.00570271	0.188524	0.00717454	0.0124643	0.158254	0.0284352	0.0133706	0.0684727	0.00453118	0.0417861	0.302093	0.0313942	0.0668794	0.040763	0.0505022	0	0.0342206	0.0307862	0.0464665
ENSG00000151651	2.62597	2.24013	4.18895	1.83379	3.89246	2.78115	5.85821	1.85438	4.06261	3.35567	3.38862	4.08171	5.06315	3.50528	3.45192	2.66847	1.89903	3.02817	2.90353	2.43713	3.50963	5.80343	2.47831	4.4293	4.33982	2.99728	0.546566	2.59331	3.13513	2.90791	2.04199	3.09537	2.38152	4.2768	3.66501	3.86759	3.14615	2.14396	4.12366	3.17318	1.72031	2.07771	3.88429	3.84666	3.65636	3.12069	2.29746	3.99897	4.01138
ENSG00000164061	0.0726699	0.0123721	0.0110758	0.0539563	0.0224234	0.0401311	0.0423346	0.0736871	0.00716824	0.0790456	0.0250115	0.0351525	0.0994567	0.020327	0.0302693	0.0185576	0.0288004	0.103007	0.00255839	0.0281593	0.0114391	0.0152568	0.0270685	0.194107	0.0487431	0.0824923	0.0630334	0.021063	0.0153896	0.00853489	0.0123494	0.204747	0.0482485	0.0288225	0.0570084	0.00740145	0.00692533	0.0733691	0.0673569	0.0478396	0.129589	0.0256049	0.0266388	0.0515144	0.0485773	0.0368959	0.0357926	0.0239223	0.0465482
ENSG00000205795	2.34195	1.15515	0.638141	1.75123	1.94176	0.818504	0.712315	0.23905	1.42707	2.0575	0.129349	1.24092	2.4106	0.905612	0.475487	1.47666	0.200013	2.29737	0.702341	1.59546	0.17687	0.610806	1.52714	0.255151	1.29824	1.80314	1.45031	1.06322	0.715224	0.942197	0.29979	1.20208	0.244894	0.205811	2.20577	0.459643	0.485805	1.83065	0.360086	1.857	1.22895	1.66988	0.764456	0.638823	1.64808	1.18712	0.986153	0.769873	1.39423
ENSG00000092094	2.4119	2.95724	2.68629	2.79289	2.72904	2.36967	2.6758	1.97264	1.45462	2.36962	2.08768	2.1532	2.42508	2.30046	2.94947	2.40566	2.83122	2.12632	2.25847	2.24944	2.78544	2.04015	2.74424	2.15576	3.17764	2.45123	2.35672	2.98979	2.52029	2.53538	1.86024	3.94747	1.57499	2.21008	2.01267	2.44015	2.32251	2.12343	2.0536	2.46474	2.46721	1.74464	1.93291	2.14803	2.26525	2.73585	2.56507	1.64867	2.28106
ENSG00000198642	2.74583	3.0047	3.3309	2.18143	3.15808	2.60302	2.99619	2.56283	2.57323	2.16528	2.27091	1.88413	2.75484	1.8006	2.74524	2.25974	2.76487	3.62349	1.45417	2.35177	2.27154	2.4934	2.79424	2.69288	3.25766	2.63315	3.04405	2.26926	2.53973	2.5194	2.77215	2.33403	2.64061	2.39147	2.70947	2.06259	3.61438	2.3886	2.91371	2.59363	2.8025	2.19033	2.00362	3.0297	2.58049	1.09325	3.02464	2.71235	3.28042
ENSG00000124251	0.226879	0.0774617	0.236631	0.283821	0.205731	0.0792315	0.729832	0.113669	0.145792	0.38322	0.206305	0.167185	0.114024	0.145382	0.131923	0.0886007	0.122507	0.183452	0.0404283	0.163789	0.200005	0.0950322	0.203672	0.446105	0.28558	0.192521	0.089733	0.224287	0.237402	0.0226646	0.152415	0.360116	0.485581	0.289928	0.431726	0.589869	0.0792917	0.586117	0.303655	0.285526	0.416189	0.368779	0.388313	0.346673	0.25648	0.178035	0.243333	0.209347	0.12654
ENSG00000074800	8.96397	9.45004	9.87044	9.78895	10.2314	10.3306	9.37711	9.55023	9.23045	9.5015	9.22001	9.22252	9.21313	9.85574	9.93091	9.10393	9.77708	8.65741	10.0028	8.94552	9.56759	9.2714	8.96561	9.02446	8.52032	9.08692	9.39501	9.65984	9.29326	9.46177	9.37843	10.1307	9.69215	9.84409	8.83053	9.55456	9.98196	9.08846	9.37258	9.1654	8.92078	9.16967	9.01181	8.42034	8.67426	10.1473	9.72677	9.92139	9.34778
ENSG00000122483	0.750811	0.851	0.374034	0.729951	0.833536	0.257001	1.28795	1.12186	0.34234	0.926086	0.554004	0.392421	0.7859	0.547779	1.8051	0.0869869	1.54933	1.86929	0.120233	0.714326	0.968853	0.82511	1.31019	0.840855	0.909223	1.05918	0.977989	1.26541	0.983235	0.826472	0.723231	0.998142	0.908554	1.39579	0.393717	0.500619	0.537868	0.523516	0.95903	0.426354	0.90091	0.333812	0.813237	0.993657	0.710492	0.80416	1.0695	0.940986	1.0901
ENSG00000145214	2.78926	0.906444	1.95164	2.28503	1.50203	2.71615	3.49058	2.44649	1.63622	2.25439	3.8242	2.99903	2.86031	3.62524	2.81407	2.58442	2.66792	2.24035	2.21917	2.54021	4.20713	2.67424	2.79162	2.98084	2.20525	2.84212	2.26698	3.26935	2.35191	2.83208	2.22295	2.50897	2.39626	4.1982	3.86853	1.56128	2.84267	3.58571	2.65067	2.91999	2.5822	2.11412	2.37348	2.57354	2.23156	1.61315	2.33503	2.18781	2.73017
ENSG00000144320	1.87902	3.3219	3.13407	3.13857	2.76006	1.54798	2.53914	3.03326	2.19976	2.49718	1.94306	2.38618	2.07419	2.81081	1.88897	2.03529	2.76183	3.16495	1.56891	2.09606	2.36715	1.5068	3.39373	2.31337	2.63484	2.80689	3.50475	2.64481	2.0007	1.6842	1.8669	2.63643	2.61799	1.86554	2.6324	1.76733	2.46797	2.46039	2.03757	2.31681	2.4601	2.69287	2.72631	1.91301	2.35011	2.35329	2.23677	2.0846	2.39251
ENSG00000134240	0.0137679	0.148874	0.226783	0.0119146	0.0352202	0.263348	0.0631505	0.262508	0	0.00623963	0.318104	0.0148938	0.0219836	0	0.0293971	0	0.0320379	0.0494287	0.0786173	0.438709	0	0	0.0529041	0.310568	0.0975496	2.57325	0	0.171154	0	0	0	0.0266231	0.00702004	0.0599764	0.0487573	0.0641145	0.0260489	0	0.1516	0.0727995	0.031348	0	0.0265448	0.0146353	0.0782958	0	0.113965	0.0375634	0.205065
ENSG00000005483	2.09813	1.30249	1.6192	1.98563	2.68781	1.33938	3.39596	3.05122	2.55542	4.48248	2.53637	2.64026	3.02305	2.08543	2.48692	1.68453	2.75545	2.65918	1.32926	2.38424	3.57912	2.54841	3.47426	3.13664	3.29634	3.98471	2.69969	3.06128	2.56069	2.03081	2.58713	3.37985	2.92441	3.02534	3.23823	3.47245	2.71974	2.91335	3.49188	2.83807	3.24549	2.73411	3.08709	3.2426	3.53593	3.43911	3.47192	2.14405	3.45208
ENSG00000088280	2.75975	1.06142	1.3291	2.2384	2.89142	1.3599	1.97417	3.09047	1.55659	2.69803	3.65356	1.34051	2.12202	1.89474	1.43456	1.53881	1.99919	3.13112	1.69861	3.18533	4.0937	1.23185	2.27696	2.05033	2.36159	3.17344	1.64301	1.62818	4.18674	1.22438	2.26634	2.60521	2.74517	1.99594	3.20324	2.4874	0.737055	3.3427	2.76888	3.40608	3.07171	2.76133	2.21027	2.16996	3.25525	2.52309	1.76932	2.87179	2.77956
ENSG00000197261	1.99768	2.18602	2.62137	3.98791	1.32515	0.256509	4.20199	2.12455	0.762461	1.64274	1.15829	1.6284	3.03116	2.13187	2.89795	1.13144	1.8263	2.15788	1.88506	1.67403	2.5153	3.15619	1.09977	0.857433	2.29365	1.73226	1.46137	3.12754	3.13468	2.8718	3.72242	4.00836	1.58112	1.89424	0.689934	1.6139	1.777	2.69528	2.00908	0.84363	0.913523	0.859246	1.95394	4.35818	1.30048	1.10007	1.04462	2.26767	1.28124
ENSG00000152256	0.982328	3.28425	2.80363	2.9303	1.57229	0.364594	1.47233	1.67203	1.71319	1.77871	1.79097	1.62182	1.78807	1.6419	1.34269	0.886878	2.42192	1.592	2.51878	0.90441	1.43404	1.10415	1.79115	1.27753	2.29588	1.33354	3.04056	1.9116	1.5243	1.37635	2.07355	1.93865	2.14411	2.55277	1.25239	1.50605	1.49743	1.23644	1.78214	1.1152	1.34788	1.41154	1.14503	1.28578	1.7424	1.13763	1.78168	1.28417	1.89043
ENSG00000143515	2.46016	2.03706	1.52872	2.81667	1.79019	1.24887	2.42476	1.62801	2.58248	3.41615	1.43386	1.58898	2.19806	2.87803	3.30251	1.65954	1.10521	2.67089	1.28772	1.95306	1.99614	1.59375	3.2689	1.59936	1.52548	3.60692	1.85622	3.17135	2.17868	1.44843	1.85534	3.45254	2.23722	2.05935	3.52671	2.36783	2.35849	2.37114	2.28602	2.91627	1.4985	2.36746	2.58345	2.50384	3.72811	3.32398	1.51097	1.82307	2.5778
ENSG00000197361	0.576425	0.698237	0.0410081	0.0665311	0.182422	0.0799567	0.071667	0.21692	0.0631223	0.187458	0.468135	0.102755	0.55552	0.114785	0.159831	0.152379	0.180305	0.386777	0.0783082	0.2505	0.589577	0.0672657	0.22658	0.0587519	0.175545	0.485718	0.206932	0.232044	0.743348	0.146072	0.241166	0.127962	0.217966	0.400646	0.160115	0.14564	0.0847271	0.584646	0.254208	0.740645	0.224029	0.252665	0.190188	0.499218	0.375803	0.11291	0.143291	0.158788	0.102466
ENSG00000136826	2.28315	2.77385	3.0828	5.24796	4.4476	5.28987	6.57832	5.30908	5.98482	3.83146	6.28056	5.2797	3.08839	4.95126	4.46195	3.75289	6.96216	5.75406	6.82164	5.62118	6.9374	6.05291	5.95757	6.39052	5.31583	5.06057	6.38272	3.01775	5.86477	4.75109	5.81594	4.79144	6.12582	5.34968	5.02515	5.19585	6.19755	5.33976	5.6145	4.36806	6.85776	4.4779	6.87894	4.89448	5.07264	4.03138	4.35706	4.2469	4.95797
ENSG00000135835	0.531008	0.18879	0.332974	0.238604	0.55532	0.159263	0.528398	0.632929	0.23192	0.930651	0.135178	0.795229	0.559435	0.528676	0.275302	0.249586	0.0922977	0.555205	0.128578	0.33844	0.659559	0.180992	0.359047	0.789534	0.980977	0.843673	0.400359	0.419763	0.19544	0.133287	0.197345	0.700163	0.568932	0.201468	0.560743	0.452443	0.18241	0.80204	0.29836	0.380333	0.688963	0.529816	0.683169	0.365111	0.575788	0.321252	0.342551	0.355463	0.38615
ENSG00000187581	0	0	0.160015	0	0	0	0.0609695	0	0	0.0298519	0	0.0704652	0	0.061007	0.136581	0.577847	0.0511711	0	0.148036	0	0	0	0	0	0.0478784	0	0.0735296	0.0894382	0	0	0	0	0.0335515	0	0.0470653	0	0	0.0500374	0.0422135	0.0394738	0	0	0.0424453	0.0350481	0	0	0	0.036255	0
ENSG00000131738	0.216246	0.0119717	0	0.0889121	0.0710994	0.0483942	0	0.41378	0.818057	0.18002	0.0563208	0.0451886	0.0335674	0	0.0448271	0.101738	0.0647473	0.0153366	0.207332	0.14922	0.27715	0.387995	0.0164286	0.188192	0.366887	0	0	0.0574905	0.0185912	0	0.279619	0.0801226	0.450408	0	0	0.188195	0.0133706	0.224351	0	0.255751	0.0120955	0.0697	0.578664	0.0112319	0.0153372	0.0357115	0.13621	0.101374	0.174294
ENSG00000130037	0.12174	0.0143286	0.0106981	0	0.0430029	0.0913687	0.209296	0.0372799	0.0611468	0.022786	0.0255714	0.22837	0.0401174	0.0235313	0.0270152	0.00899105	0.0294442	0.20617	0.072346	0.197672	0.016542	0	0.0293861	0.123551	0.115704	0.343304	0	0	0.0222413	0.118965	0.0504419	0.00820086	0.0319516	0.0223192	0.0710757	0.0506975	0.0318273	0.215657	0.063803	0.130991	0.00725652	0.0695785	0.0404272	0.0465155	0.379457	0.0531479	0.0307804	0.0139104	0.200749
ENSG00000260300	0.164845	0.013138	0.0483872	0.0783796	0.0394621	0.561341	0.0108245	0.132207	0	0.0917444	0.21218	0.0125444	0.0368111	0	0.0370114	0.0407505	0.10513	0.0168289	0	0.0214148	0.0887071	0.0480652	0.130009	0.0234539	0.0168876	0.130542	0.026085	0.0318419	0.050464	0.0337005	0.0279569	0.254976	0.0466167	0.0305962	0.0572754	0.0311883	0.0146726	0.0523376	0.0657426	0.0480644	0.239084	0.0450236	0.0297525	0.0184505	0.033465	0.00989002	0.116364	0.0441557	0.0296046
ENSG00000237700	0	0	0	0	0	0	0	0	0	0	0	0	0.0132611	0.0231218	0	0	0	0	0	0	0	0	0	0	0	0	0	0	0	0	0	0	0	0	0	0	0	0	0	0	0	0	0	0	0	0	0	0	0
ENSG00000075643	1.47406	2.7048	2.12907	5.03783	2.97116	2.43712	2.92963	3.74064	1.2503	3.31223	3.99188	1.14442	1.94535	1.16279	1.60567	1.63288	1.86436	2.51663	1.36838	1.32518	2.49494	3.49314	1.55214	3.12423	3.3252	2.34648	0.433528	2.30931	2.53249	1.59973	1.30753	0.846357	1.61659	2.64326	0.697684	2.64773	2.62022	1.82115	2.50308	1.82465	3.21885	1.81821	1.76529	2.98012	2.48908	1.80291	1.09867	1.23778	2.14157
ENSG00000131165	5.87107	4.77572	5.86873	5.92903	5.93149	6.06	4.77422	5.56374	5.48262	5.79312	5.46066	6.01171	4.9751	5.68008	5.79487	5.53174	5.38764	4.42012	4.77617	5.52452	5.71382	5.36206	5.12555	4.90839	5.8749	5.1958	5.14932	5.44643	5.45115	5.71744	5.5487	5.34555	5.82016	5.78679	5.33842	5.48181	5.31548	5.96668	5.68297	5.06275	5.69961	5.72514	5.50601	4.82735	5.07591	5.30755	5.79145	5.32607	5.42661
ENSG00000179546	0.746986	0.223531	1.17911	0.631335	0.79254	0.101173	0.0347043	0.283536	0.34035	1.77124	0.291272	0.196439	0.0590424	0.686212	0.437976	0.111388	0.094751	0.437253	0.533018	0.111798	0.393104	0.101667	0.183317	0.0252582	0.0626857	0.255686	0	0.231862	0.360496	0.43995	0.171865	0.485164	0.398893	0.011065	0.0956946	1.36614	0.0545761	0.681489	0.0935449	0.0804752	0.237918	0.66503	0.369496	0.0523967	0.219555	0.651472	0	0.432177	0.407278
ENSG00000062524	0.398214	0.66045	0.918185	0.0175202	0.395682	0.266949	0.374802	0.329091	0.122696	0.420573	2.54474	0.410032	0.239986	1.48927	0.0641855	0.1247	0.172263	2.02537	0.338054	0.450519	0.193339	0.0627882	0.393611	1.66937	0.154939	0.200657	0.132019	0.191093	0.269826	0.0680148	0.103293	0.253492	0.364536	0.94063	0.210386	0.369301	0.075448	0.392439	0.321245	0.139695	0.522981	0.146696	0.290941	0.206617	0.5532	0.0595627	0.0369627	0.060396	0.125309
ENSG00000230430	0	0	0	0	0	0	0	0	0	0	0	0	0	0	0	0	0	0	0	0	0	0	0	0	0	0	0	0	0	0	0	0	0	0	0	0	0	0	0	0	0	0	0	0	0	0	0	0	0
ENSG00000089597	6.64257	4.92541	6.1723	6.16265	6.80358	6.88118	7.5871	7.25944	6.30149	7.00471	6.6098	7.05366	6.92298	7.08834	6.5491	5.36154	6.50817	6.96466	4.87225	5.83726	6.55999	6.26814	6.75665	7.81994	7.03615	6.30772	6.22574	6.90816	5.72528	5.19627	5.89793	7.20513	6.4848	5.14042	6.54839	6.61005	6.40904	6.36046	6.54243	6.7993	6.70621	7.06527	6.91138	6.41632	6.6201	7.51234	6.8633	6.97643	6.45974
ENSG00000058272	1.86276	2.56272	1.82831	2.21393	2.41022	1.99407	2.97317	2.38193	2.06768	2.00242	1.99131	1.47474	2.71522	1.65922	2.78539	1.45966	3.05742	2.71977	1.13531	2.15001	2.50341	2.30535	2.72555	2.63868	2.76344	2.77736	2.57159	2.85934	2.30882	1.98963	2.55782	2.91296	3.00711	2.74391	2.38285	2.23561	2.8715	2.86815	2.60011	2.33987	2.49	2.10611	2.39423	2.87463	2.82084	2.96951	2.43695	2.67895	2.94293
ENSG00000133422	3.09025	2.20149	2.24279	2.74412	3.53813	2.72887	3.56854	4.44835	2.97208	4.06243	3.93303	3.26032	3.64795	3.50444	3.36143	2.37421	3.63829	3.43721	2.50356	2.99623	3.14787	2.87028	3.81433	3.44768	3.66185	3.22348	3.45155	3.51698	3.65831	3.3704	3.21193	3.72575	3.20825	3.65782	3.5618	3.60554	2.87971	3.90556	3.14482	3.16607	3.43426	2.65819	3.65725	3.84044	3.19303	3.82548	3.74477	3.75903	2.89824
ENSG00000166250	2.85008	3.75623	1.28884	2.89403	1.59031	2.92294	0.968617	1.30431	3.93589	1.85043	1.01321	1.46538	3.0325	2.92067	3.43878	1.89261	0.664683	1.57003	2.25696	2.47102	2.5199	2.92585	2.54273	0.443819	1.34195	2.57422	0.556045	4.39761	1.20526	2.5541	2.50973	2.69256	3.44179	1.98673	3.57193	2.44457	2.87904	2.99416	2.83876	3.32956	1.22353	4.33169	4.31916	2.48885	3.61666	3.04479	1.27063	1.69394	3.49717
ENSG00000124731	2.04292	3.20047	3.64173	2.1893	1.95484	0.812211	0.179982	1.67245	4.40151	2.1735	0.93641	3.85275	1.35578	1.50593	0.322653	1.11944	0.315565	0.491319	2.61721	0.581118	1.92064	1.62664	1.18478	0.392091	1.31702	1.24495	0.617621	3.07343	3.16002	2.68272	0.807581	2.17318	0.693359	1.69989	2.77455	1.78909	2.91995	2.04716	1.49787	1.71432	1.36657	0.85738	1.13165	1.18949	1.63954	1.69505	0.450099	0.580204	2.96572
ENSG00000133794	1.09012	1.84679	2.61394	1.86665	2.03841	0.832528	1.75883	1.3952	1.52729	3.42207	0.960106	1.40173	1.24577	1.53078	2.31433	0.525891	1.75479	2.08232	0.979603	1.12557	1.93826	1.48955	1.7842	1.79351	1.90749	2.12133	2.23399	1.68926	1.5432	0.913676	1.8233	1.62905	2.42052	2.15579	1.78294	1.67745	0.899883	1.84949	2.69286	1.24053	1.96309	1.68033	1.9829	2.05956	1.74544	1.84026	1.32405	1.34295	1.32035
ENSG00000162670	0	0	0	0	0.0089432	0.156027	0	0	0	0	0	0	3.4045	0.00971881	0	0	0.00812845	0	0	0	0	0	0.00811227	0	0.00759809	0.0717178	0	1.68115	0.0091836	0	0	0.0334148	0	0	0.00746727	0	0	0	0	2.02927	0	0	0.0529436	0.00554113	0.00757188	0.428158	0	0	0
ENSG00000153933	0.444441	0.976399	0.598999	0.881627	0.458252	0.247717	0.837586	0.560375	0.186481	0.558697	0.894907	0.300798	0.564649	0.405215	0.507065	0.4147	0.97939	1.10487	0.161607	0.545627	1.49836	0.616613	1.2213	1.23143	0.930868	0.909647	1.21915	0.478051	0.741941	0.284439	0.698942	0.73363	0.869498	1.16079	0.829939	0.814536	0.368879	0.783164	0.748761	0.553754	0.709622	0.53402	0.745764	1.06664	0.69132	0.459239	0.504215	0.250743	0.777135
ENSG00000135333	0.033011	0.018804	0.00804244	0.00822736	0.173543	0.0154145	0.0947599	0.0880266	0.0129729	0.183972	0.270165	0.0128484	0.21048	0.00888194	0.0152799	0.129491	0.389265	0.343944	0.0111017	0.060589	0.00623439	1.04234	6.7944	0.649462	0.139224	0.208164	1.27524	0.0293804	0.0208909	0.00464946	0	0.0455991	0.00967377	0.0251206	0.408317	0.0600922	0.0299008	0.050077	0.139973	0.416967	0.160154	0	0.151846	0.0325986	0.126109	1.22402	2.1452	0.0616532	0.0670478
ENSG00000167978	4.47069	2.52557	2.97228	4.54381	4.71373	4.00343	5.68695	5.58722	4.15642	5.14569	4.66757	4.78644	5.96965	4.6212	5.38437	2.79501	5.34628	4.7098	3.58308	4.28005	4.40084	4.62225	5.61863	4.85151	5.19208	5.32984	3.59025	5.41754	5.46037	4.47468	5.47268	5.83144	4.50469	4.83215	5.04161	4.76331	4.83699	5.62197	5.8656	4.57047	5.76464	4.52111	5.25289	5.95187	5.2641	4.62615	4.94113	5.12443	5.18152
ENSG00000079387	1.82626	2.33119	1.94202	2.52615	2.73779	2.11268	3.29135	2.50548	1.38984	1.74005	1.89272	1.69792	3.21908	1.89349	2.32598	0.977308	2.06667	3.08606	0.932189	1.72786	2.27468	1.87827	2.57322	2.99722	3.04811	2.08529	2.26998	1.84645	1.67888	1.46908	1.93648	2.3898	2.73109	2.85868	2.44425	2.34834	2.36761	2.37766	2.04327	2.39676	2.92067	2.19459	2.32479	2.83846	2.38075	2.5536	2.42109	2.12433	2.36249
ENSG00000070950	1.10495	1.92279	2.26726	1.34763	1.30154	1.60947	2.82085	1.41057	1.43879	1.34933	0.967958	1.16705	2.00948	1.45804	2.14593	1.01988	2.93128	2.97744	0.547835	1.06979	1.40011	1.55658	2.10817	2.77482	2.80918	1.37121	1.82306	1.34769	1.09761	1.18602	1.28748	1.58938	1.55913	1.8076	1.10545	1.25043	1.55186	1.1819	1.29573	1.28673	2.23579	1.47874	1.39853	1.91185	1.26542	1.53852	1.54897	1.40446	1.71061
ENSG00000116977	2.88219	2.68735	2.91079	3.40477	2.99674	2.31763	3.18118	3.03426	2.35024	2.33005	2.70588	2.78095	3.56346	2.51318	2.59953	2.1363	2.70698	2.8109	2.34341	2.55212	3.11798	2.73162	3.02018	2.56295	2.79189	3.59578	3.2672	2.86231	1.97038	2.65122	2.07365	2.93874	2.95555	2.38696	3.01678	3.42967	2.26154	2.63035	2.85225	2.36563	2.80545	2.60495	2.2838	2.03726	2.62402	2.49462	2.49184	2.48363	2.91678
ENSG00000185885	7.76359	7.73656	7.92399	5.06244	8.69094	8.54786	5.60896	7.68659	5.96545	7.85054	6.35285	6.32528	6.59317	6.5115	7.58917	5.48103	5.68696	8.12848	4.95906	7.70792	8.47613	8.9044	5.95411	9.37382	7.2959	5.51955	2.69966	4.55971	7.86296	6.9675	6.39844	7.79285	5.59865	4.54426	6.67694	6.03797	6.6153	5.44518	6.81285	6.20959	6.25512	7.04336	5.78459	5.11947	6.66702	8.09288	5.66119	6.97645	8.54249
ENSG00000120820	3.31524	3.41863	2.88687	1.05797	0.906201	1.44782	1.05393	0.936774	2.58771	1.89741	0.7385	0.807672	3.4606	2.10937	1.8006	2.02183	0.515492	1.65185	1.20351	2.31225	0.913416	1.40343	2.92704	0.79049	1.77834	3.36157	0.800128	3.07293	1.70817	2.34168	0.560865	2.42815	1.11215	1.36447	3.7524	1.87324	1.7781	2.86617	0.831039	3.4256	1.19301	2.83105	2.52318	2.20362	3.48718	1.78297	1.77323	2.28606	2.81426
ENSG00000119669	3.66213	2.31226	2.90442	2.9455	4.11171	3.76323	4.10109	3.77855	3.20685	3.90701	3.23628	3.08681	4.3321	3.27806	4.1666	3.06867	3.39669	3.09434	2.1197	3.11437	4.02836	3.74802	4.13486	4.8812	4.76446	3.67931	4.71746	3.8675	2.89952	2.83533	3.8791	4.0043	3.78536	2.65006	3.84134	3.38008	2.98734	3.60338	3.71264	3.66204	3.58713	4.32792	3.75769	3.54158	3.47162	4.33952	3.86637	3.77535	3.7385
ENSG00000170417	1.47699	2.14302	2.46444	1.4046	1.26169	0.913868	1.50544	1.50069	0.291152	0.617726	1.16245	0.667059	0.897667	0.972767	0.875987	1.10785	1.06528	1.51166	0.399151	2.0967	1.19359	0.531531	1.82174	1.26662	1.26129	1.02277	1.36544	0.799582	0.62238	0.51517	0.71833	0.887985	1.65481	1.93129	1.11777	0.387232	0.295396	1.80983	0.698479	1.03456	0.825911	1.03304	1.24882	1.15729	1.11159	0.848906	0.571185	1.37925	1.47833
ENSG00000186881	0	0	0	0	0	0	0	0	0	0	0	0	0	0	0	0	0	0	0	0	0	0	0	0	0.0530688	0	0	0	0	0	0	0	0	0	0	0	0	0	0	0	0	0	0	0	0	0	0.0225086	0	0
ENSG00000174460	0.107489	0.315307	0.0267042	0.0541208	0.0405129	0.10692	0.0725363	0.0557846	0.0763358	0.195161	0.15344	0.0756193	0.277788	0.0148112	0.0504446	0	0.0489384	0.598495	0	0.0292445	0.0104026	0.0111115	0.0726572	0.133898	0.245393	0.272016	0.070345	0.106211	0.0415899	0.045951	0.0255431	0.147069	0.047855	0.0417346	0.0778675	0.104085	0.010062	0.160972	0.108399	0.162579	0.0970905	0.035349	0.15592	0.205078	0.12217	0.0663952	0.0574109	0.101593	0.147802
ENSG00000173599	2.65801	2.44347	2.39838	3.31832	3.11279	3.76818	3.60917	5.17387	3.66201	4.35377	4.56561	3.48253	2.36193	4.09136	4.46221	2.35612	3.94394	3.54899	4.21598	2.45171	3.19935	3.58367	4.71723	1.89431	1.81749	3.98991	3.53705	3.81219	2.58716	3.85532	3.79697	4.2457	3.77047	5.15449	2.3732	3.49154	3.38357	2.85462	3.57608	2.71703	3.48578	4.28909	4.12282	2.87362	3.0812	3.97139	6.34599	3.18717	3.66764
ENSG00000178988	4.73963	4.15646	4.61176	3.81817	3.93737	4.71397	5.13166	4.36281	2.97422	3.85698	4.50448	4.35508	4.30101	4.46184	4.57269	4.47549	4.581	5.54135	4.07599	5.2153	5.19815	4.9099	4.37947	5.27393	5.36121	4.60162	4.63548	4.63768	4.58661	4.62211	4.23588	3.87118	4.55309	4.29448	4.27591	3.12771	4.08573	4.832	4.42294	4.75863	5.06747	4.05744	4.25362	4.37509	4.10198	4.24554	4.17873	4.69318	4.75008
ENSG00000176165	0	0.0204676	0	0.0372561	0.29813	0.0234378	0.460905	0.666819	0	0.0642995	0	0.0117588	0.519286	0.0728442	0.00778622	0.0051551	0	1.58022	0	0.153302	0	0	0.00565521	0.00491577	0.00529647	1.21008	0	0	0	0.722185	0	0.9754	0	0.0630007	0	0	0	0.00553901	0.286972	0.00869766	0.028868	0	0.330101	1.03612	0	0.498311	0.0264767	0.540928	0.0657496
ENSG00000164934	2.95684	4.09674	4.16192	2.95318	2.73384	2.65444	2.32172	2.98537	2.31651	2.59383	2.63186	2.28361	3.13168	2.95135	3.3054	3.61557	3.51326	3.08332	2.56285	2.81539	3.75559	2.77934	3.53785	3.36971	3.36849	2.63933	3.03214	3.85315	3.67229	3.15444	3.19769	3.03119	2.61589	2.82935	2.30418	3.20691	2.39658	2.95724	2.79506	2.77345	2.32497	2.6247	3.27053	2.81496	2.36622	3.02969	3.36746	3.46042	3.27411
ENSG00000161958	0.451742	0.500108	1.02402	0.730285	0.941858	0.447749	0.266138	1.32885	0.110862	0.544545	1.45393	0.0969569	0.232634	0.643973	0.579702	0.0578188	0.518295	0.457947	0.372914	0.427388	0.627994	0.0740851	0.182179	0.385061	0.929732	1.00246	0.0773633	1.38291	1.84135	0.500989	0.0997824	1.29356	0.895954	0.988758	0.505121	1.0163	0.668319	0.679573	0.376963	0.436533	0.119372	0.354381	1.00271	1.38069	0.395751	1.18194	0.467243	0.475065	1.22976
ENSG00000162891	0.287184	2.78545	2.23181	1.49037	0.345187	1.43364	0.141143	0.0134336	1.4062	2.58309	0.722229	2.11104	0.160358	2.40728	0.922225	0.554999	0.258815	3.28196	2.80932	0.950806	1.5288	3.96518	0.15096	0.045378	0.0327428	0.51062	0.0504258	1.64201	0.557707	0.883424	1.69511	1.42809	1.18934	0.019957	0.266672	1.84329	1.30146	0.163552	0.862406	0.348933	1.09443	2.13141	1.30009	0.202335	0.734132	1.89102	0.288728	0.0848702	1.15623
ENSG00000163395	0.179203	0.0181879	0.00742538	1.34068	0.15526	0.0122097	0.00546885	0.00522711	0.131731	0.0800082	0.00990297	0.166344	0.0598491	0.206533	0.213428	0.0268448	0.0495519	0.0106312	0.213191	0.590023	0.026666	0.427102	0.00911877	0.00594986	0.00213999	1.1018	0.0164979	1.0656	0.0830306	0.175197	0.957808	0.512822	0.659589	0.0435205	0.10157	0.184444	0.395875	0.633338	0.0734755	0.664038	0.015052	0.0738555	0.196352	0.0262908	0.0789011	0.0779303	0.0442503	0.111839	0.603711
ENSG00000141756	6.51315	6.04232	4.69883	2.59919	5.31881	3.19347	2.92318	5.75838	5.02168	6.17129	3.61419	3.20913	5.37114	5.11914	2.88701	6.67155	1.38035	4.74819	2.16273	3.23486	4.5944	2.69554	5.96092	4.71631	4.98338	5.36621	1.97158	5.14517	5.1932	4.33274	1.65737	4.31372	2.88943	5.83871	5.48704	3.61096	3.51001	4.92066	2.57873	5.41092	2.45258	4.81448	5.2535	5.70031	5.11681	4.31825	3.58718	4.52385	5.35944
ENSG00000166881	2.34525	2.6837	2.29901	2.80325	2.93179	2.48653	5.23759	2.61558	1.62795	2.39556	2.1615	1.71411	4.28286	2.27252	2.56532	0.984232	3.00228	3.69877	1.10115	1.82261	2.42187	1.83416	3.08632	4.27675	4.17414	2.39861	2.89815	1.80707	1.87474	1.81962	1.97154	3.31243	3.1716	2.82221	3.13091	2.91198	2.6393	2.64834	2.59337	2.14289	3.13533	2.09166	2.19179	2.59297	2.6417	3.34847	2.84618	2.42174	2.92179
ENSG00000178115	0	0	0	0	0.0422691	0	0	0	0	0	0	0.0178999	0	0	0	0	0	0.0120491	0.0571768	0.0305174	0.0108585	0	0.012908	0	0	0.0760874	0	0.011461	0	0.0161573	0	0.0107357	0.00844156	0	0.0236695	0	0.010503	0	0.0212118	0	0.0560863	0	0	0	0	0	0	0	0.00852658
ENSG00000004660	2.0209	0.54152	1.11434	2.17752	2.18913	1.29926	2.73126	1.18998	0.587428	1.75793	2.15339	1.14005	1.96404	1.29172	1.78609	1.86143	0.927575	0.922685	1.83509	1.19679	1.91893	1.89289	2.32402	2.94182	2.91383	1.80012	1.77929	1.50303	2.88781	1.34844	1.65775	2.35052	1.16886	1.69614	2.41431	1.97843	1.44384	2.04319	1.12639	1.59995	2.36769	1.14002	1.55791	1.55335	1.1054	1.29569	1.52952	1.55598	1.10893
ENSG00000134717	2.9055	4.85329	4.25073	3.85019	3.30918	3.15011	3.13088	3.3081	2.38671	3.17756	3.66159	2.42089	2.87817	2.78156	3.04988	3.43394	3.96238	3.9439	2.85803	3.39935	3.6722	3.2948	3.20508	3.19832	3.28904	3.16598	3.37134	3.02218	3.85448	3.33633	3.44715	2.90162	3.23501	4.00671	2.78095	2.70387	2.74955	2.58444	2.70346	3.14312	3.3807	3.00828	2.52726	2.70672	2.77952	2.95725	3.09298	3.035	3.25975
ENSG00000172247	0.341051	0	0	0.0365044	0.60582	0.00988595	0.352234	0	0.0231692	0.0381377	0.0978977	0.174108	0.241087	0.0777104	0.110384	0.0594632	0.0329897	0.728585	0.20884	0.0771206	0.0816322	0.0296046	0.244488	1.70346	1.58995	0.209747	0.0239629	0.180349	0.0187355	0.0207173	0	0.0543197	0.0428489	0.143966	0.131718	0.0567522	0.0134746	0.0638033	0.0405875	0.122807	1.42681	0.0471988	0.264045	0.0988119	0.119248	0.0536495	0.0130286	0.0688892	0.0432753
ENSG00000272442	0	0	0.0170162	0.00872936	0.0172914	0	0.0915213	0.0819122	0	0.0181904	0.013644	0.0217483	0.104223	0	0.0533392	0	0.0389841	0.0857252	0.0234613	0	0.0197549	0.0280606	0.0465644	0.0271599	0.0579108	0.114178	0.0887739	0.068351	0.0177549	0.0485921	0.0243427	0.229781	0.0255237	0.0178172	0.035844	0.0538186	0.0254242	0.0605128	0.0447928	0.0418881	0.0789747	0.00567043	0.0194746	0.0424314	0.0219144	0	0.00618591	0.00555965	0.0155227
ENSG00000177694	0.202219	0.128964	0.0606137	0.0813519	0.514286	0.0837051	0.312593	0.419434	0.119252	0.0849334	0.159109	0.0891736	1.28105	0.219357	0.123683	0.220032	0.282753	0.512993	0.0391799	0.156037	0.140255	0.0361424	0.569899	0.0538718	0.205912	0.53285	0.457318	0.0876898	0.0364548	0.0939019	0.0681251	0.445209	0.0185068	0.83582	0.608891	0.0521657	0.0327553	0.158584	0.38266	0.270909	1.38307	0.131761	0.149043	0.18628	0.279188	0.078106	0.0839842	0.141086	0.152871
ENSG00000112305	1.5862	1.83827	1.32915	2.08	2.27131	1.4803	2.68974	1.67733	2.39062	1.80238	2.02878	1.66028	1.99011	1.6153	1.91321	2.24612	2.59814	2.57161	1.36624	2.08744	2.36937	1.61562	2.28331	1.82173	2.55049	1.85099	2.61285	2.55143	2.20048	1.48782	2.20199	1.77906	1.85682	2.22564	2.37171	2.28653	1.95678	2.27038	2.44525	2.66378	2.06914	2.36721	2.00909	1.96854	2.10561	1.42319	1.6904	1.69721	2.3627
ENSG00000163393	1.10478	0.985244	2.40501	0.967048	1.12209	1.19309	0.225964	1.19414	0.966778	2.1176	0.91311	1.07664	0.686348	0.844883	1.3869	0.433619	1.01308	1.16102	0.548489	0.988525	1.14082	1.21823	0.454367	0.385075	0.251351	1.98866	0.485677	2.14209	0.173014	0.722775	0.464977	1.46385	1.64198	0.230487	0.851936	1.24991	0.779877	1.43246	1.14677	1.01816	1.31542	1.06902	1.02892	0.429478	0.737433	0.794637	1.1474	1.30523	1.25167
ENSG00000115718	1.10178	0.337123	0.822488	1.41486	1.18479	0.64529	0.277503	0.0903521	0.168857	1.69694	0.102437	1.76806	0.698077	2.20699	1.98905	2.2743	0.167885	0.495134	1.13018	1.51066	0.764563	0.925058	0.206587	1.21694	1.24026	3.29471	0.34265	0.739392	1.4606	0.409229	1.2616	0.481962	1.49031	0.0617648	0.51101	0.892407	0.300481	1.77722	0.510951	0.494548	0.287707	1.32986	1.12855	0.532597	0.681156	1.53781	0.446797	0.902913	1.41155
ENSG00000181958	0	0	0	0	0	0	0	0	0	0	0	0	0	0	0	0	0	0	0	0	0	0	0	0	0	0	0	0	0	0	0	0	0	0	0	0	0	0	0	0	0	0	0	0	0	0	0	0	0
ENSG00000114767	4.26074	4.23329	4.75227	3.59606	3.43624	4.69965	3.01543	4.40255	3.11664	4.13074	4.42615	4.07181	4.70368	4.70403	5.07041	4.82947	4.6516	4.14996	2.88863	4.13899	4.70525	4.90269	4.36935	4.60921	3.75522	3.62207	4.41588	4.10176	5.11402	4.06655	3.91331	4.72738	3.79767	4.51093	3.6036	3.84067	3.5972	3.7541	4.26853	3.66915	3.9123	3.97858	4.12922	5.05719	3.28309	3.75114	3.75927	3.6627	4.45151
ENSG00000108468	4.66978	3.89299	3.84806	4.21386	4.63904	4.58351	4.9437	4.9686	3.55366	4.69331	5.02571	4.16401	4.68788	4.69621	5.13975	4.31793	5.24123	5.23932	3.58592	4.3221	4.5841	4.72439	5.71908	5.14071	5.02297	5.01027	4.99112	4.89693	4.62285	3.94851	4.22838	4.54327	4.55271	4.59138	4.55257	4.47212	3.93395	4.48191	3.53502	4.47017	5.05743	4.01408	4.67434	4.77793	4.01948	5.2884	4.77537	5.0939	5.17888
ENSG00000106397	5.64328	2.7604	4.27388	2.73105	4.08962	2.78519	4.41783	4.45111	3.79966	5.79823	3.38914	4.37141	5.10061	4.21049	3.71864	3.44366	3.06182	3.84736	2.76537	3.34364	5.09847	4.03106	4.78158	4.04734	3.5304	4.39366	3.49769	4.31263	2.644	3.23898	3.07397	4.34918	3.9724	3.64258	3.95352	3.96084	3.37813	3.24562	3.39302	3.32451	2.88578	3.85998	3.99944	4.03784	3.78626	4.72784	3.41734	4.47504	4.00176
ENSG00000143891	2.56603	1.20616	1.38594	0.409905	2.0373	3.00816	2.18198	2.23878	2.37184	1.57584	1.04604	1.23749	2.50196	1.07432	1.10277	2.13972	1.17336	1.97426	0.767135	2.51911	1.44289	1.43307	1.84607	3.18015	1.44423	2.89727	0.262772	1.32356	0.887326	0.994243	1.11379	2.41745	0.855258	0.658945	3.0681	1.66792	1.67023	1.9805	1.78917	2.92754	1.45195	1.58179	1.59418	1.50668	2.88846	1.78258	2.64842	1.57232	2.57703
ENSG00000129351	4.32746	3.60504	3.49789	4.37167	4.37554	4.22737	4.6103	5.10167	3.65965	4.58186	4.61027	4.32691	5.91784	4.59879	5.0887	3.5946	5.13544	5.19208	3.00323	4.43989	5.04502	4.60879	5.28922	4.84119	4.82004	4.52832	4.95507	4.89393	5.18046	4.43602	4.37143	5.04395	4.6857	4.8881	4.29668	4.07599	4.36899	4.61945	4.65116	4.23997	5.11234	4.16643	4.93909	5.19864	4.55573	4.43188	4.7591	4.56683	4.37835
ENSG00000126003	2.25996	2.01775	2.37977	3.25617	2.87957	3.25089	3.56122	3.43231	2.3313	3.8127	3.57228	3.0056	2.97658	3.26054	3.4589	2.13032	3.16309	3.4035	2.39655	2.4017	3.42995	2.89181	4.26954	3.88466	4.10204	3.13081	2.71675	3.34015	3.14567	2.56741	2.61031	2.8059	3.18139	3.595	3.88017	3.72276	3.09475	2.89519	3.28614	2.99669	3.96431	3.16489	3.29251	3.93518	2.96958	3.42335	3.21482	2.7992	3.08454
ENSG00000110931	3.16127	2.84792	2.76683	2.82656	3.15415	3.64168	3.48854	3.68707	2.82549	3.27124	3.56781	2.50167	4.37257	3.04343	3.03978	2.42605	3.21752	2.79002	2.43742	2.95168	3.80666	2.91558	3.21452	4.36469	3.80205	3.15954	3.30133	3.35876	3.02989	3.40759	3.10068	3.78416	3.74995	4.06276	3.19541	3.6867	3.6561	3.43044	3.55685	3.48112	3.38656	3.31244	3.22617	3.67725	3.31731	3.3784	3.79745	3.09132	3.27901
ENSG00000040933	1.25755	0.971677	1.06599	1.65773	1.37831	0.904564	2.41943	1.62652	0.994073	1.43037	1.12156	1.29135	1.80927	1.43878	1.28262	0.717025	1.18431	2.02799	0.372747	1.17478	2.02782	1.465	2.23558	3.31114	2.19023	1.7048	1.02843	1.76011	1.82779	0.973541	1.22482	1.91388	1.47522	1.92937	1.7024	1.86903	1.36778	1.66691	1.42168	1.53401	1.39189	1.48071	1.26515	1.98366	1.98162	1.57031	1.057	1.35577	1.90327
ENSG00000177692	0.48232	0.699938	0.352602	0.783237	0.39558	0.509708	0.837784	0.636672	0.217448	0.343884	0.556156	0.235382	0.0817102	0.27878	0.46834	0.494383	0.833884	0.575923	0.392891	0.50895	0.585409	0.407489	0.362978	0.296841	0.430331	0.505191	0.578854	0.45473	0.541338	0.400253	0.383857	0.387845	0.35352	0.178627	0.146306	0.502425	0.194815	0.313043	0.189245	0.362551	0.465533	0.270319	0.482555	0.529303	0.282692	0.193861	0.285427	0.618365	0.279987
ENSG00000137834	0.663973	0.43213	0.13082	0.234845	0.656531	0.404197	0.529406	0.620629	0.189029	0.800562	1.08193	0.503348	1.4393	0.36477	0.249156	0.477662	0.284509	1.29305	0.0663759	0.512801	1.30157	0.335565	0.593723	1.60535	0.642281	0.747717	1.03879	0.107859	0.492013	0.171821	0.360524	0.579148	0.45781	0.163245	0.568518	0.35251	0.248312	1.44711	0.531484	0.813915	1.13015	0.424941	0.373509	0.775476	0.646287	0.627436	0.336469	0.354778	0.380488
ENSG00000129221	0	0.233067	0.00752512	0	0.0526985	0	0.194515	0.0105754	0	0	0.059194	0	0.0606384	0.00831078	0.0190345	0	0.0276024	0.0257233	0.0207023	0.0164455	0.0289326	0.0430643	0	0.0649812	0.0321944	0.0104366	0.0100545	0	0.0311583	0	0.00719585	0.0172325	0	0	0.0378912	0	0.0168597	0.0336544	0.022738	0.0106656	0.0303477	0	0.00574999	0.0141657	0.00647419	0.0522965	0.0054546	0.00490226	0.027257
ENSG00000189152	0.0516769	0.0392252	0	0.03002	0.0445063	0.0242139	0.0162753	0.0103909	0	0.0157684	0.0235537	0.046685	0.00933079	0.0323891	0	0	0.0404968	0.0501186	0	0	0.0340507	0.012219	0.0135985	0	0.0502914	0	0.019691	0.0120744	0.0753616	0	0	0.055686	0.0177333	0.0307256	0.0125192	0.0235537	0.0110653	0.0525573	0	0	0.0100093	0	0.03357	0.0185288	0.12218	0	0	0.0567642	0.00898344
ENSG00000110881	0.959077	0.333723	0.446523	0.245567	1.25468	0.981033	0.263325	0.301237	0.686689	0.811097	0.224662	0.53882	0.597477	0.296802	0.60017	0.943516	0.67166	0.98519	1.29789	0.616168	0.160959	1.16158	0.360825	1.25446	0.482938	0.884455	1.08117	0.476762	0.339157	0.504805	1.18013	1.13767	0.852391	0.130909	0.498006	1.34635	0.312541	0.847127	0.72498	1.14039	1.18774	0.576534	1.49992	0.798418	0.569069	0.694379	1.30687	1.39974	0.775851
ENSG00000205439	0	0	0	0	0	0	0	0	0	0	0.0753017	0	0.144841	0	0.0600144	0	0	0	0	0	0	0	0	0	0.0410592	0	0	0	0	0	0	0	0	0	0	0	0	0	0	0	0	0	0	0	0.0807097	0	0	0	0
ENSG00000164051	2.75466	3.49648	4.09458	2.41307	3.47786	4.07607	3.21515	3.54762	2.24459	3.1054	3.2726	3.10151	2.94477	3.50285	4.16709	3.25642	3.80487	3.02884	2.89776	3.03957	2.90007	3.80417	3.09943	4.26876	3.08875	2.22823	3.66577	2.46446	3.65296	3.42048	2.9689	3.5365	3.4068	3.19682	2.5533	2.75154	3.58434	3.01841	2.95799	2.98774	3.41185	2.3902	2.88341	3.34308	2.46511	3.14105	2.48477	3.04916	2.62699
ENSG00000025039	1.78242	0.450409	1.1019	1.86388	2.9112	1.81733	1.60684	1.68303	1.88369	1.50982	1.25821	1.28452	1.4897	0.660839	1.03471	3.05957	3.47891	3.00447	3.10573	3.18263	0.797832	0.315988	1.64703	1.41062	1.42076	2.00838	2.13792	0.885054	0.42553	0.513054	0.664815	1.88758	1.42162	0.281162	2.50325	1.13392	0.424081	1.54468	2.05688	2.15141	2.59752	0.919876	1.24941	0.568755	1.66757	1.2583	1.85442	0.908558	1.716
ENSG00000148343	2.30431	1.19985	1.32841	2.05771	1.86188	2.08432	2.64047	2.25066	0.981578	1.78249	2.72163	1.93258	2.49132	1.50092	1.89895	1.39987	2.13107	2.04158	2.0123	2.26481	2.09041	2.36825	2.34157	1.86518	2.0867	2.50427	2.1334	1.62031	2.0902	1.62	1.4947	2.63399	1.96692	2.48977	1.90633	1.86099	1.21758	2.06928	2.20829	1.32278	3.04986	1.92312	2.23716	1.48707	2.23966	1.98834	2.26847	1.62857	2.22602
ENSG00000164053	0.0211796	0.0120432	0.00898991	0.0364396	0.00913572	0.0342474	0.0775268	0.0375669	0	0.0474325	0.0426962	0.028577	0.099017	0.0585682	0.131256	0	0.0888112	0.147324	0	0.0390062	0.04132	0.0295518	0.0886393	0.0635789	0.023161	0.0370785	0.035733	0.0364136	0.0733958	0.0410683	0.0256381	0.211621	0.021545	0.0825956	0.0302734	0.0143729	0.0399808	0.0945122	0.0537717	0.00638358	0.0539645	0.017849	0.0340278	0.0446746	0.0382667	0.0535547	0.0194642	0.0232888	0.0643223
ENSG00000164687	7.18558	7.40176	8.1699	8.08751	9.02386	8.04942	3.13362	6.63826	8.79888	7.83118	6.60857	8.59733	4.2788	8.68629	7.32748	9.71766	8.12249	6.18334	9.57332	8.62905	6.64642	7.03036	4.26912	3.66951	1.29558	6.33437	7.31506	9.20169	9.95206	9.71813	9.86323	7.90972	7.12016	4.43139	6.20707	7.53962	8.61451	8.39893	7.33995	8.66075	8.65108	8.09512	7.17198	7.32483	7.01748	5.37087	9.3556	7.69831	7.6969
ENSG00000197956	10.1144	12.073	10.8232	9.97814	9.83329	11.4455	7.71482	9.01853	9.10591	9.05709	11.1072	9.34835	9.05683	9.69897	8.74294	12.9478	9.42458	9.05666	10.4272	9.55515	9.26908	10.737	9.7356	7.40062	9.03974	9.51535	11.7952	9.08035	9.85989	10.4526	7.79729	9.00933	9.28061	10.8333	9.56685	9.09316	8.69057	8.85236	9.49463	8.84888	8.99056	8.57222	8.73159	9.05927	9.30404	8.50877	8.88629	8.98008	8.66689
ENSG00000186980	0	0	0	0	0	0	0	0	0	0	0	0	0	0	0	0	0	0	0	0	0	0	0	0	0	0	0	0	0	0	0	0	0	0	0	0	0	0	0	0	0	0	0	0	0	0	0	0	0
ENSG00000159173	4.70644	1.34357	2.14519	0.511016	1.25565	0.378038	0.556718	0.996821	0.322653	0.36438	0.687093	0.263448	0.679538	0.731986	2.79575	2.77976	0.553914	0.621375	0.116637	5.55444	1.36578	0.414051	2.61486	0.498354	0.489519	2.04618	0.556227	0.90818	0.251922	0.565419	1.93974	0.546315	5.00982	0.561462	3.72493	0.423976	0.136996	5.26814	0.270391	4.88354	1.12082	2.62756	3.86185	0.850458	3.70163	3.10992	3.055	2.30791	4.13919
ENSG00000079435	0.750102	0.191893	0.365382	0.156618	1.53396	1.22419	2.74535	0.856756	0.448699	1.23439	1.00251	0.822699	0.450492	0.303785	0.512966	0.328307	1.90982	1.91112	0.448998	0.659181	1.31712	1.15656	1.72175	2.85192	1.7601	0.622068	0.378275	0.447218	0.337095	0.25041	0.552825	0.855533	0.534118	0.059254	1.05162	1.19663	0.220282	0.955642	0.995716	0.788293	2.54823	0.898154	0.553564	0.686412	1.11118	0.505698	1.09534	0.796884	0.998288
ENSG00000146955	0.199579	0.275291	0.115847	0.146556	0.967856	0.111475	1.8965	0.216283	0.0193603	0	0.181327	0.0752169	0.521602	0	0.42766	0	0.0546462	0.480762	0.0410813	0.126505	0.196281	0.20878	0	0.929028	0.345501	0.367589	0.116179	0.0721559	0.0311351	0.0680243	0.0565445	0.234019	0.0358449	0.232836	0.213568	0.159869	0.615872	0.053437	0.449002	0.161739	0.56705	0.0394934	0.131949	0.127006	0.622286	0.11678	0.478874	0.0194953	0.465888
ENSG00000002745	0.105141	0.71989	0.0542849	0.0187426	0.208983	0.0300559	0.107835	0.147812	0.0118691	0.0437016	0.596291	0.0803432	0.106575	0.020228	0.112565	0.305893	0.319452	0.157582	0	0.777782	0.450344	0.0376603	0.0745138	1.00963	0.122003	0.484656	1.12392	0.0735006	0.0931523	0.0625123	0.158463	0.355015	0.44926	0.56094	0.119982	0.218823	0.0475627	0.42259	0.18382	0.06397	0.165083	0.0302832	0.0278911	0.0789793	0.0468085	0.0184754	0.0460063	0.011952	0.198635
ENSG00000151239	3.31881	5.92569	4.80347	4.89031	4.17203	4.68167	3.77708	4.2048	3.8877	3.30398	4.02251	4.01601	4.27472	4.23666	4.30476	2.85361	5.05755	4.66284	3.74884	4.21202	4.47325	4.41236	4.3616	3.84338	3.90965	4.02595	4.93508	4.22921	4.2165	4.05172	4.92202	3.89797	5.9967	5.30692	3.68713	3.76178	5.34382	4.48626	4.44552	3.84924	3.84087	4.31888	4.07533	4.3198	4.02699	4.94491	4.17601	4.1823	4.36753
ENSG00000253250	1.10982	1.86457	0.432603	1.53997	2.91429	0.400488	2.48715	0.219058	0.733725	1.2756	0.153179	0.273694	3.0352	0.471217	0.643769	0.304463	1.43326	3.62373	0.174854	0.545891	1.3213	0.322884	0.861048	2.85882	2.30541	0.829208	0.0442877	1.67468	0.101634	0.313004	0.0933786	2.14666	0.135133	0.10198	1.10212	0.291645	0.210627	0.778536	0.679772	0.882393	1.73871	0.371869	0.775723	2.78222	0.927647	0.509052	0.306134	0.415532	0.359957
ENSG00000167822	0	0	0	0	0	0	0	0.0221382	0	0	0	0	0.0198878	0	0	0	0	0	0	0	0	0	0	0	0	0	0	0	0	0	0	0	0	0	0	0	0	0	0	0	0	0	0	0	0	0	0	0	0
ENSG00000180628	1.91994	2.86567	1.53198	2.41423	3.09121	2.60968	3.36054	2.21553	1.8504	1.77129	2.02234	1.82928	2.74317	1.80168	1.95373	2.04008	2.52406	3.57928	0.480527	2.42566	2.34702	2.26814	2.0625	2.90699	3.12459	2.3366	1.90871	1.59319	2.00317	1.86153	1.39578	2.07026	1.63166	2.94506	2.63689	1.72019	2.37162	2.04844	2.56413	2.88354	2.73158	1.83326	1.65699	2.77803	2.33266	3.44728	2.50028	1.74273	2.71347
ENSG00000206190	1.53448	0.364558	0.0900894	0.126017	0.541885	0.312889	0.851527	0.654013	1.13523	0.404193	0.415169	0.342663	1.34116	0.391888	0.510798	0.608403	0.28923	0.711294	0.180863	1.11642	0.142318	0.310341	1.54637	0.317441	0.539461	1.80223	0.0745437	1.03129	0.445851	0.558024	0.191785	0.865447	0.226526	0.305921	2.31522	0.453314	0.612781	1.04599	1.08009	1.21766	0.393943	0.951958	0.806894	0.696312	1.422	0.965062	0.527671	0.919919	1.36497
ENSG00000169906	0	0	0	0	0	0	0	0	0	0	0.0519743	0	0.120035	0	0	0	0	0	0	0	0	0	0	0	0	0.0889392	0	0	0	0	0	0	0	0	0	0	0	0	0	0	0	0	0	0	0	0	0.0470863	0	0
ENSG00000137648	2.65498	2.80926	1.39612	3.42734	5.00576	3.60173	4.60558	4.31973	3.54617	2.2268	6.04613	3.66322	2.41826	1.89681	1.58643	4.35394	4.1106	3.54418	3.42197	3.05744	3.82361	3.62588	4.77363	5.46966	4.42409	3.25823	6.20451	1.87486	3.62742	1.47542	3.39456	4.77546	2.60236	4.26289	4.09508	4.19836	3.96539	2.77778	4.71217	3.74906	4.21076	3.04873	3.87131	3.80194	2.43577	1.42759	5.41918	2.94157	2.84391
ENSG00000177947	0	0	0	0	0	0	0	0	0	0	0	0	0.00609136	0	0	0	0	0	0	0	0	0	0	0	0	0	0	0	0	0	0.00921396	0.0147334	0	0	0.0163059	0.0154027	0	0.00869971	0.00732293	0	0.0195164	0	0.0146899	0	0	0	0.0139374	0	0
ENSG00000148057	1.12589	1.37122	2.13015	1.37112	1.39756	1.29319	0.579812	1.46555	0.494048	0.723489	1.27319	0.849246	0.646914	1.14123	0.740754	0.94588	0.927324	0.902612	1.14178	1.69664	1.71301	0.760566	0.800025	1.04775	1.001	1.35786	2.08465	0.479881	1.18331	0.844838	0.631549	1.26247	1.06509	2.3239	1.19292	0.848386	0.792149	0.8131	0.77119	0.904653	2.06467	0.693999	0.774515	0.861144	1.22272	0.502891	0.799595	0.92394	0.75816
ENSG00000171812	4.03087	2.41893	1.56514	2.29514	3.76347	2.59389	4.18306	1.51516	3.24879	3.89443	3.87345	1.60655	4.3511	3.06098	2.65883	2.93394	1.40059	3.8604	2.44196	2.60806	4.35889	1.91606	3.2611	3.96509	4.12791	3.8684	0.658896	3.40035	3.28216	2.04914	0.56769	3.28234	1.69941	2.68086	5.46224	2.8702	1.22491	3.78162	2.17882	5.13171	3.4344	4.15022	2.76119	3.25365	3.77486	1.60335	2.38981	1.62547	2.83286
ENSG00000173482	1.82375	1.1234	2.01049	1.96301	1.11641	0.714946	2.26157	1.65672	1.81491	1.67223	0.622456	0.842895	2.68892	1.02821	1.30772	1.208	0.623301	2.24053	0.253368	1.82673	1.40174	0.765896	1.98777	2.26911	1.5452	2.89948	0.467649	1.27727	1.04652	1.68469	1.39744	2.41822	1.16848	1.04299	2.67459	1.28275	1.34177	2.24699	1.24391	2.43246	1.51011	1.31191	2.25532	2.09785	2.69481	2.30133	1.33179	1.56189	2.4933
ENSG00000102119	5.29905	4.87047	4.61482	5.04541	4.87068	4.86966	4.71057	5.08027	4.90686	4.9327	5.16032	5.25148	5.64142	5.21978	4.64157	4.99044	5.37797	4.77401	4.57869	5.0758	5.01732	4.76182	5.06886	5.43864	4.43316	4.84948	4.76261	5.43286	5.5282	5.00545	4.97187	4.72916	4.55757	4.46124	4.74765	4.69048	3.93402	4.89961	4.91085	4.3393	4.82743	4.80055	5.16722	4.89613	4.27419	5.15386	4.74557	4.46979	4.35996
ENSG00000182180	4.92307	5.12678	5.5541	5.4798	5.14626	5.10431	4.99011	4.76953	4.22811	5.12125	4.41391	5.01372	5.08289	4.73789	5.10891	5.72995	4.71767	5.24499	4.72116	4.78336	4.4487	4.58886	4.68745	5.14699	5.54506	4.65891	5.08689	4.41785	5.31747	4.92435	4.38722	4.85222	4.97353	4.8776	4.28145	4.78571	4.40464	4.64121	4.62475	5.18842	4.88762	4.76942	4.77162	5.00923	4.46755	5.0096	4.89681	4.90745	4.46659
ENSG00000164434	0.20618	0.23163	0.0109794	0.0444109	0.022229	0.105	0.105551	0.023072	0	0.00588126	0.0434723	0.0210103	0.0546248	0.0596268	0.0139273	0.124106	0	0.344104	0.0151499	0.521472	0.228514	0	0.0499115	0	0.0921108	0.45544	0.861787	0.104302	0	0.0126723	0	0.159656	0	0.0895106	0.0277729	0.0262402	0	0.0680069	0.0654494	0.302226	0.0295623	0.0432444	0.0658058	0.212323	0.0094476	0.07577	0.0158784	0.0142757	0.00668364
ENSG00000139988	1.00327	0.243506	0.288227	4.41081	0.998435	1.82765	0.121533	0.951076	3.28583	0.376271	3.10458	0.274404	0.145507	0.554877	1.33774	0.299035	0.949479	1.77039	1.67816	4.4364	2.91538	0.875499	0.0576368	0.208957	0.176036	1.49441	1.62384	2.66095	4.63065	2.29346	4.4235	1.45834	1.60344	0.222509	1.57194	2.359	2.33611	4.09491	0.215637	6.03201	0.791706	4.49398	2.35816	0.263367	4.36061	0.236821	0.685874	0.569109	2.35724
ENSG00000256537	3.62983	2.97079	2.24542	1.96294	2.08343	2.30334	2.03875	2.86547	1.49001	1.86154	2.14095	2.2058	5.33698	1.90297	2.08668	3.87843	2.65356	3.3885	1.92693	2.56966	1.88046	2.22368	3.72962	2.39379	2.52518	2.3524	2.92359	2.58256	1.83249	2.50823	1.97045	2.74814	2.40631	2.29305	2.31946	2.22636	1.58194	2.19639	2.79317	2.38365	2.18592	2.26269	1.70293	2.03206	2.0753	2.29377	2.18859	2.79636	2.55417
ENSG00000188015	2.13997	3.67735	1.55688	3.13611	2.41866	2.74477	1.51353	1.34199	1.86294	2.35588	2.76974	2.93525	2.16545	2.97646	2.65998	3.33504	2.93543	2.17894	4.50918	2.86132	2.61011	2.86862	1.75407	0.971756	1.78587	4.39407	2.56849	5.02793	3.27121	3.41309	3.68852	2.92954	2.40079	3.61412	2.66647	2.41057	2.50906	2.59041	3.10542	2.32473	3.41734	2.43788	2.22736	1.60643	1.93174	2.19055	2.57227	2.50045	1.52119
ENSG00000184058	3.77241	2.21703	1.28136	0.692389	0.871815	1.48206	0.818372	2.70725	1.49888	2.65043	2.7277	2.34563	2.49016	1.80563	2.32968	3.0514	0.56989	1.79109	2.69369	2.51868	3.45859	3.03453	2.59269	0.581602	0.382422	2.20164	3.26567	0.931164	2.95194	2.48155	1.63903	2.44667	2.5422	0.412406	1.92249	1.30198	1.44336	3.03169	1.96245	1.82443	1.37588	2.14376	2.78078	1.91336	1.78684	2.59533	0.988753	1.58593	0.74638
ENSG00000187848	0.0179512	0	0.0151894	0.0155378	0.104732	0.0249332	0	0	0	0.0560517	0.059886	0.0290282	0.00960946	0	0.0192602	0	0.0553269	0.550131	0	0.0654411	0.0465582	0.0250584	0.0820551	1.21558	0.0131181	0.0417868	0.0599954	0	0.0158492	0	0.0145265	0.0685179	0.0629281	0.0625936	0.0256712	0.0242535	0.0113956	0.0541029	0	0	0.0307061	0	0.0116136	0.00957173	0.013073	0	0.0219527	0	0
ENSG00000186625	3.18871	3.86894	3.7174	3.29194	3.55855	2.90385	3.22247	2.82342	2.44392	3.4919	3.4615	3.20458	3.59088	2.97321	3.41953	3.55234	4.04735	3.92036	3.0894	3.5274	3.93528	3.42066	3.47925	2.83145	3.69009	3.56754	3.89006	3.89349	3.55954	2.57621	3.00187	3.26248	3.28753	2.99628	3.02863	2.93331	2.87161	2.83862	3.08191	2.92685	3.47327	2.93389	3.30064	2.90516	2.98535	3.81226	3.50089	3.20873	3.28276
ENSG00000166387	1.34665	0.605627	0.438707	2.25096	2.27392	2.0412	4.08058	1.70511	1.84104	0.353998	2.71422	1.03076	2.70147	0.872384	0.60674	0.571416	1.88184	3.56976	1.71185	2.70068	1.5855	1.79784	2.03262	4.40384	3.27631	1.72836	2.33832	1.5939	2.97819	1.1962	2.1711	2.00089	1.23565	1.75739	2.02802	1.42316	2.09532	2.24602	1.7491	2.10613	2.63639	2.456	2.07393	2.10876	2.35474	0.606209	2.86676	0.967062	1.71488
ENSG00000158769	5.18983	4.48076	4.91309	5.51157	5.73674	5.62505	5.92749	6.18495	4.90572	5.95101	6.16687	6.24003	5.57466	5.42168	4.76062	6.15151	6.20359	5.68784	5.37513	5.04107	5.43001	5.38911	5.55603	5.18797	5.24226	5.63132	6.19667	5.52343	4.81997	4.71166	5.26398	5.04007	5.74233	6.10179	5.81371	4.93836	5.00931	4.85134	5.29428	4.29208	6.41737	5.17242	5.13713	4.87254	4.54988	5.00464	6.0307	5.71963	4.59824
ENSG00000101890	0.0190268	0.00541793	0	0	0.00820365	0.0132721	0.00890974	0.00568315	0.0104266	0.00863155	0	0	0.00510248	0	0	0	0	0	0.0222013	0	0	0.00668493	0	0	0	0	0	0.0131812	0	0	0	0	0	0	0.00684948	0.0064689	0.00605263	0.0145403	0.00613455	0.00573174	0	0.00536412	0.012311	0.00508242	0	0	0	0	0.00980787
ENSG00000182264	0.194567	0.0859393	0.0518804	0.161722	0.0353526	0.0844821	0.066483	0.0783419	0.033744	0.197666	0.38186	0.0279057	0.127604	0.103204	0.0440385	0.007376	0.0636159	0.0225375	0.105538	0.0934108	0.249876	0.499971	0.54712	0.0621029	0.0668113	0.0121713	0.0689672	0.0495428	0.236748	0.0887232	0.181677	0.141207	0.803614	0.0806903	0.168919	0.172581	0.0707946	0.0997754	0.0653557	0.049122	0.469366	0.0346484	0.0785023	0.243946	0.628381	0.04372	0.0190055	0.0671744	0.0159657
ENSG00000119139	3.11377	1.72371	2.21759	3.03807	4.38388	4.03581	4.67263	4.3725	4.60865	3.99375	4.33049	3.28235	3.10263	3.19706	3.43699	2.13743	3.83867	4.16461	3.65314	3.58488	4.4254	5.00815	2.32676	4.04521	4.61888	3.82691	3.55453	3.49375	4.13409	3.85369	4.18056	3.79506	3.90406	4.84961	3.54369	3.72886	4.44549	3.79745	4.80273	3.56099	4.8402	4.21232	5.0848	4.31117	4.19956	4.07186	4.57538	3.08471	3.88003
ENSG00000118777	0.198457	0.381451	1.72426	0.503647	0.243039	1.59465	1.2659	0.433769	0.544415	0.226627	0.824713	0.414615	0.509369	1.12909	0.549886	0.362039	0.312829	0.739101	0.107316	0.747171	0.0930248	0.316729	0.222047	0.32345	0.447383	1.14112	1.66061	0.365456	0.170721	0.261324	0.445401	0.712578	1.27664	0.142156	0.629353	0.597387	0.543348	0.61866	0.234232	0.748529	0.372001	0.732974	0.402394	1.00607	0.837915	0.558252	0.747417	0.28479	1.19584
ENSG00000113389	1.08029	0.0910604	0.111389	0.88359	0.607665	0.952987	0.486568	1.21377	0.484036	0.707099	0.141688	0.803228	0.442312	0.052883	1.76122	1.18629	2.72248	0.994115	0.0937428	1.04293	1.67925	0.58835	4.96818	3.78813	1.68804	0.644362	3.41004	0.255184	0.0864144	0.485499	2.39547	0.659183	2.25863	0.110557	2.07394	0.577531	0.0449575	1.53839	0.596181	0.544546	2.44074	0.403292	0.956356	0.171473	0.642791	0.31609	0.486318	0.134369	0.429392
ENSG00000172399	0.751452	0.489088	0.830576	0	0.248014	0.00634211	0.0253389	0.00812066	0.022275	0.00617729	0.0275513	0	0.132605	0.012733	0.418201	0.273752	0.0212244	0.0869345	0.0159099	2.92874	0.254254	0.0190386	0.761429	0.0545856	0.105919	0.969456	0.0306367	0	0.0120325	0	0.731054	0.00883994	3.62112	0.0359254	1.84794	0.0456308	0	2.87106	0.00876509	3.3784	0.141821	0.445993	1.17783	0.0144895	2.06643	1.01983	1.36142	0.310638	2.77062
ENSG00000162456	0	0.0071566	0	0	0	0	0.0117644	0	0.0273999	0	0	0	0	0	0	0	0.00984662	0	0.0292717	0	0.00826528	0	0	0.00854374	0	0	0	0	0	0	0	0	0	0	0	0	0	0	0.0241724	0	0	0	0	0	0	0	0.0154175	0	0.00648904
ENSG00000139514	4.40236	1.74762	3.91226	4.03124	4.50144	5.73242	4.00274	4.8331	4.82904	5.13638	3.23725	5.31689	3.57546	4.54823	5.07761	3.194	4.03707	3.22185	2.44367	4.15689	4.74291	5.4907	3.72706	4.80497	4.29315	4.3785	2.97229	3.43895	3.98159	4.13946	4.81457	4.8041	5.5425	5.1881	4.44397	6.2746	4.95337	5.79676	6.21468	3.93151	5.65955	5.91425	5.72071	5.47028	5.49779	4.1792	5.51903	6.48642	5.13959
ENSG00000126787	2.71662	4.64714	4.46645	2.69273	3.77007	2.99578	3.70768	4.22662	2.19923	3.14112	2.25497	3.50779	3.48983	3.16059	4.20832	1.54072	4.57081	3.95203	2.42607	1.91772	4.53816	2.54256	3.38955	3.10984	4.34965	3.03347	3.80225	3.65338	2.55619	3.25481	2.65987	4.1026	3.70466	3.47572	2.20934	2.75167	4.07601	2.33845	2.44272	3.42884	3.58546	2.7378	3.41714	3.28009	2.90983	4.44188	4.33594	3.70037	3.56265
ENSG00000112319	0.728582	0.669529	0.325729	0.802508	1.59304	0.00551133	0.0256791	0.0187437	0.0635837	0.633862	0.0885193	0.343958	0.504044	0.0220523	0.0706138	0.113672	0.00617847	1.6128	0.00462536	0.384776	0.410829	0.191984	0.450183	0.00268251	0.0539517	0.508561	0.338169	0.253332	0.027724	0.0115689	0.0596544	1.86445	0.286346	0.980798	0.630317	0.0809236	0.017477	0.369109	0.885238	0.685574	0.0622358	0.145932	1.24486	0.101753	0.441211	0.135428	0.0940051	0.0806231	0.255216
ENSG00000132182	1.53368	1.21636	0.487936	3.08073	4.44463	3.87293	5.54128	4.35265	1.53839	0.898004	2.63316	1.93747	5.04403	2.35517	1.80338	2.01438	4.51859	4.56641	0.750879	2.30837	2.28669	2.34943	2.92167	4.26134	4.18661	2.45982	2.03069	0.795224	0.900421	0.707021	0.477253	3.16622	1.04524	4.62581	3.01765	3.84167	3.05502	1.74893	2.48982	3.10619	5.39808	1.27016	1.31721	3.24401	3.21961	0.93492	3.22442	0.948615	2.3816
ENSG00000156521	3.60281	2.56816	3.08409	2.78649	2.8547	2.97535	2.96009	3.3949	1.84288	3.26932	3.34489	3.41887	4.01151	3.48433	3.06494	3.87142	2.28955	2.80014	2.50579	3.10645	2.82075	2.54608	2.56293	3.54392	3.45534	2.84155	3.86052	2.4362	3.9592	2.99335	2.51282	3.05828	2.95759	2.46596	2.53852	2.88418	2.57838	3.47234	3.00602	3.37149	3.20412	2.13677	3.07065	3.26848	2.37609	2.90611	2.59936	3.26142	2.19866
ENSG00000172081	3.98251	3.33151	3.97979	4.85701	4.25943	3.95161	4.34877	4.33977	4.11273	5.22253	4.9989	4.77846	4.20406	4.91293	5.10067	3.59895	4.52149	4.49678	4.42184	3.99378	3.52924	4.12524	3.65062	4.59545	4.67148	4.15427	3.5715	4.15162	3.1072	4.15139	4.36923	4.39714	4.70027	4.7582	4.01942	3.96	4.33042	4.04803	4.66811	3.85889	2.82398	3.93184	4.06603	4.49957	4.59319	4.42851	4.82021	4.22191	4.21211
ENSG00000169548	0.726133	0.108446	0.0139297	0.13653	0.519883	2.01869	0	0.324823	0.00901847	1.04148	0.0222479	0	0.0605767	0	0	0.217831	0	0.41549	0	0	1.36227	0	0.352962	0.0441574	0.0120295	0	0	0	0	0.016075	0	0.342001	0	0	0.0118227	0.284003	0	0	0	0.441398	0.169783	0.0184655	0.0106493	0.555669	0	0.0140458	0	0	0
ENSG00000078579	0	0.011894	0	0	0.0179888	0	0.0951155	0	0	0.00949289	0.014195	0	0.0223196	0	0	0	0	0.117616	0	0.0385273	0	0	0	0.0421722	0	0.0245184	0	0	0	0	0	0	0	0	0	0	0	0	0	0	0.0357549	0	0	0	0.0152377	0	0	0	0.0214923
ENSG00000070748	0	0	0	0.0102372	0.310936	0	0.0964799	0.0070465	0.0193411	0.00535971	0.0159961	0.00641362	0.00632685	0	0.0252799	0	0.00924342	0.100081	0	0	0.00775869	0.00828792	0.0983693	0.130626	0.0172296	0.0276169	0	0.0163331	0.0104428	0	0	0.0676124	0.0060303	0	0	0.00802023	0.0223971	0.00903572	0	0.00710672	0.0664788	0	0	0	0	0.0399466	0.265044	0.0130131	0.0421072
ENSG00000177034	1.73666	1.02213	1.12917	1.71544	1.33783	1.36077	3.10149	1.51471	1.07335	1.27357	1.47046	1.63683	2.0964	1.48855	2.10528	1.31894	2.16782	2.88984	0.963108	1.64864	1.9793	1.69505	1.80694	1.80325	2.05435	2.06721	1.74947	2.02134	1.51748	1.42785	1.46309	2.00304	1.87493	1.89588	2.16811	1.38802	1.41935	2.14619	1.7498	1.95606	2.37862	1.51049	1.9889	2.13346	1.88886	2.15245	2.0074	1.83671	1.93886
ENSG00000158008	0.0911313	0.0351168	0.0327594	0	0.0658219	0.0323781	0.0145585	0.0231208	0.00427674	0.0556102	0.00529761	0.0335416	0.0248899	0.0361469	0.0250258	0.122656	0.00610644	0.104411	0.0181994	0.34696	0.0203905	0.0109285	0.0714854	0.00529754	0.0615766	0.399281	0.0176161	0.0161684	0.0274032	0.0526012	0.0251246	0.0547779	0.339542	0.013815	0.174481	0.0210747	0.00495659	0.461831	0.0348039	0.337947	0.0266894	0.134324	0.0883288	0.0288837	0.221467	0.0395471	0.10638	0.0383053	0.149115
ENSG00000182170	0	0	0	0	0	0	0	0	0	0	0	0	0.0216575	0	0	0	0	0.114237	0	0	0	0	0	0	0	0	0	0	0.0356245	0	0	0	0	0	0	0.0274154	0	0	0.0260081	0	0	0	0	0	0	0	0	0	0
ENSG00000149571	0.0372431	0.0598418	0.147143	0.0231197	0.0634096	0.169715	0.0639518	0.0900697	0.0885152	0.220938	0.0677157	0.133604	0.0973306	0.134464	0.0229578	0.0489108	0.0291542	0.30284	0.0311411	0.187086	0.0140499	0.0554856	0.105237	0.566137	0.113386	0.115437	0.0420322	0.018512	0.0375482	0.0668306	0.0173207	0.0847038	0.0405503	0.046947	0.280093	0.0502017	0.0102048	0.0993124	0.106676	0.0816834	0.0184026	0.213296	0.104015	0.067183	0.0947778	0.0716974	0.0326298	0.0322562	0.067625
ENSG00000146950	1.66997	1.86632	1.01816	1.89432	3.25796	1.97321	2.81885	3.53986	1.8604	2.67093	2.97169	2.55323	1.77712	1.63076	2.04633	1.78798	1.32538	2.23267	0.788914	1.79297	2.8537	1.47918	1.77292	3.04439	2.12924	1.24734	1.44808	2.52057	2.18173	1.59248	2.88807	2.33554	1.59355	2.42283	1.52148	2.22338	2.20671	1.79631	1.50558	2.106	2.37056	2.71561	1.0715	2.5626	1.84253	2.56266	2.52889	1.94669	2.5346
ENSG00000185201	6.44357	7.06619	4.54719	6.05429	6.84955	5.85965	4.11624	4.20796	6.15225	5.07875	5.00007	4.85551	5.84438	4.07557	3.45699	6.22444	3.23933	4.49854	3.83301	5.82057	6.40226	3.68743	4.72814	4.9635	3.51209	5.18295	2.71833	4.35029	5.99608	4.53483	2.94044	5.05367	3.22951	5.38141	6.17743	4.75741	3.81707	4.81626	4.20689	5.27907	2.81542	4.53941	5.17055	5.06901	5.35853	4.57941	3.26733	5.90675	5.32709
ENSG00000205133	1.86967	2.53259	3.07857	1.0442	2.10678	0.999164	2.28695	1.50258	1.39319	1.84079	1.67101	1.77079	1.62673	1.56985	1.07173	1.84409	2.34437	3.16763	0.135543	1.62568	2.35418	1.03146	1.32333	2.49296	2.69495	2.18855	1.84085	2.65194	1.22401	1.49849	1.95181	1.07465	2.07567	1.80449	1.66146	0.941791	1.21783	2.70104	1.71297	1.97571	1.52046	1.55695	1.56314	1.77935	1.63372	0.7307	1.64224	2.33935	1.86742
ENSG00000173157	0.370453	0.0166066	0.201181	0.098496	0	0.282671	0.00457616	0.00291735	0.00802748	0.139545	0.34443	0.41511	0.847586	0.00457903	0.0209341	0.0242055	0.00764709	0.0106716	0.162591	0	0.671749	0.128151	0.449934	0.00663458	0.00714806	0.0341742	0.152639	0.111058	0.112488	0.188503	0.0275223	0.346074	0.00498792	0.160332	0.200224	0	0	0.689739	0.0617159	0.161448	0.277993	0.0164423	0.26564	0.192799	0.161945	0.199111	0.319668	0.00269959	0.153087
ENSG00000128310	0.0893938	0.01732	0	0.0263433	0	0	0	0.204192	0	0.0941283	0.100478	0	0	0	0	0.0640377	0.242404	0.0655329	0.136928	0	0.0397113	0.0213498	0.0701134	0	0.128648	0	0	0.0210979	0	0	0	0.151035	0	0	0.0646476	0.0410348	0	0.0232667	0.0580195	0.0183188	0.166113	0	0.0391518	0	0.0440193	0	0	0.0334362	0.0312499
ENSG00000140368	2.40101	1.62723	0.361232	0.604197	1.21569	1.03196	1.74558	0.509181	1.60451	0.402436	1.01155	0.989322	1.28698	0.730787	0.93068	0.990787	0.88636	1.11054	0.947207	2.21098	0.729136	1.43637	0.710335	1.8008	0.7727	1.20262	1.18029	0.974622	1.75098	0.65661	0.719541	1.35679	1.14936	1.01158	1.90968	1.00888	2.1993	2.64384	1.23238	1.93955	0.877672	0.553419	0.630892	0.836881	1.94566	0.658569	0.83223	0.809729	1.4426
ENSG00000226733	0	0	0.0428065	0	0	0	0	0	0	0	0	0	0	0	0	0	0	0.0368894	0	0	0	0	0	0	0	0	0	0	0	0	0	0	0	0	0	0	0	0	0	0.0304991	0	0	0	0	0	0	0	0	0
ENSG00000096717	1.55015	1.51328	1.504	2.36084	2.0517	1.65284	2.87968	1.86955	1.70671	1.96949	2.27167	1.72289	2.37162	1.61777	2.3683	0.835634	2.019	3.11234	1.14727	2.08831	2.05565	1.81422	2.23428	3.17791	3.35163	2.4894	1.51065	1.91797	2.29696	1.22199	2.07059	2.29487	2.19172	1.4822	2.26835	2.25292	1.71891	2.36452	2.07015	2.53078	2.40344	1.85253	2.13257	1.91919	2.43691	2.56279	2.07521	1.68592	2.3716
[truncated: 18,672 more rows]
[truncated: 202 more columns]
