# Supplementary material for: Six-gene signature for predicting survival in patients with head and neck squamous cell carcinoma
Source: Aging (Albany NY). 2020 Jan 12;12(1):767–83. doi: 10.18632/aging.102655 (PMC6977678; doi:10.18632/aging.102655)
Supplement: Supplementary Table 6 [file aging-12-102655-s003..xlsx]

## Sheet: 工作表 1
表格 1
samples	type	age_at_initial_pathologic_diagnosis	gender	race	ajcc_pathologic_tumor_stage	histological_type	histological_grade	initial_pathologic_dx_year	menopause_status	birth_days_to	vital_status	tumor_status	last_contact_days_to	death_days_to	cause_of_death	new_tumor_event_type	new_tumor_event_site	new_tumor_event_site_other	new_tumor_event_dx_days_to	treatment_outcome_first_course	margin_status	residual_tumor	OS	OS.time	DSS	DSS.time	DFI	DFI.time	PFI	PFI.time
TCGA-4P-AA8J	Supplement table 6：Infromation of test set clinical	66	MALE	BLACK OR AFRICAN AMERICAN	Stage IVA	Head & Neck Squamous Cell Carcinoma	G2	2013		-24222	Alive	TUMOR FREE	102	NA					NA	Complete Remission/Response			0	102	0	102	NA	NA	0	102
TCGA-BA-4074	HNSC	69	MALE	WHITE	Stage IVA	Head & Neck Squamous Cell Carcinoma	G3	2003		-25282	Dead	WITH TUMOR	NA	462			Distant Metastasis	bone (humerus)	396	Complete Remission/Response			1	462	1	462	NA	NA	1	396
TCGA-BA-4075	HNSC	49	MALE	BLACK OR AFRICAN AMERICAN	Stage III	Head & Neck Squamous Cell Carcinoma	G2	2004		-17951	Dead	WITH TUMOR	NA	283			Oral Cavity		236	Progressive Disease			1	283	1	283	NA	NA	1	236
TCGA-BA-4076	HNSC	39	MALE	WHITE	Stage IVA	Head & Neck Squamous Cell Carcinoma	G2	2003		-14405	Dead	WITH TUMOR	NA	415			Larynx		286	Complete Remission/Response			1	415	1	415	NA	NA	1	286
TCGA-BA-4077	HNSC	45	FEMALE	WHITE	Stage IVA	Head & Neck Squamous Cell Carcinoma	G2	2003		-16536	Dead	WITH TUMOR	NA	1134					NA	Persistent Disease			1	1134	1	1134	NA	NA	1	1134
TCGA-BA-5152	HNSC	56	MALE	WHITE	Stage IVA	Head & Neck Squamous Cell Carcinoma	G2	2009		-20783	Alive	TUMOR FREE	1288	NA					NA	Complete Remission/Response			0	1288	0	1288	NA	NA	0	1288
TCGA-BA-5153	HNSC	51	MALE	WHITE	Stage III	Head & Neck Squamous Cell Carcinoma	G2	2005		-18743	Dead	WITH TUMOR	NA	1762			Distant Metastasis	bone (hip)	1522	Complete Remission/Response			1	1762	1	1762	1	1522	1	1522
TCGA-BA-5555	HNSC	54	MALE	BLACK OR AFRICAN AMERICAN	Stage IVA	Head & Neck Squamous Cell Carcinoma	G2	2010		-19956	Alive	TUMOR FREE	520	NA			Oropharynx	L tonsil	248	Complete Remission/Response			0	520	0	520	NA	NA	1	248
TCGA-BA-5557	HNSC	41	FEMALE		Stage IVA	Head & Neck Squamous Cell Carcinoma	G2	2010		-15247	Alive	TUMOR FREE	623	NA					NA	Complete Remission/Response			0	623	0	623	NA	NA	0	623
TCGA-BA-6868	HNSC	53	MALE	BLACK OR AFRICAN AMERICAN	Stage IVB	Head & Neck Squamous Cell Carcinoma	G2	2011		-19608	Dead	WITH TUMOR	NA	472			Distant Metastasis	L neck subdermal mets	344	Partial Remission/Response			1	472	1	472	NA	NA	1	344
TCGA-BA-6869	HNSC	62	MALE	WHITE	Stage III	Head & Neck Squamous Cell Carcinoma	G2	2010		-22765	Alive	TUMOR FREE	644	NA					NA	Complete Remission/Response			0	644	0	644	0	644	0	644
TCGA-BA-6870	HNSC	60	FEMALE	BLACK OR AFRICAN AMERICAN	Stage IVC	Head & Neck Squamous Cell Carcinoma	G2	2010		-22222	Dead		NA	451					NA				1	451	NA	451	NA	NA	0	451
TCGA-BA-6871	HNSC	75	MALE	WHITE	Stage IVA	Head & Neck Squamous Cell Carcinoma	G2	2011		-27708	Dead	WITH TUMOR	NA	108					NA	Stable Disease			1	108	1	108	NA	NA	1	108
TCGA-BA-6872	HNSC	47	MALE	WHITE	Stage IVA	Head & Neck Squamous Cell Carcinoma	G2	2004		-17296	Dead	WITH TUMOR	NA	384					NA				1	384	1	384	NA	NA	1	384
TCGA-BA-6873	HNSC	28	MALE	WHITE	Stage IVA	Head & Neck Squamous Cell Carcinoma	G2	2011		-10512	Alive	WITH TUMOR	122	NA			Oral Cavity	L Tongue and bilat. neck LNs	66	Progressive Disease			0	122	0	122	NA	NA	1	66
TCGA-BA-7269	HNSC	61	MALE	WHITE	Stage III	Head & Neck Squamous Cell Carcinoma	G1	2010		-22609	Alive	TUMOR FREE	1273	NA					NA	Complete Remission/Response			0	1273	0	1273	0	1273	0	1273
TCGA-BA-A4IG	HNSC	77	MALE	WHITE	Stage IVA	Head & Neck Squamous Cell Carcinoma	G3	2011		-28402	Alive	TUMOR FREE	855	NA					NA	Complete Remission/Response			0	855	0	855	NA	NA	0	855
TCGA-BA-A4IH	HNSC	57	MALE	WHITE	Stage IVA	Head & Neck Squamous Cell Carcinoma Basaloid Type	G3	2012		-21094	Alive	TUMOR FREE	622	NA					NA	Complete Remission/Response			0	622	0	622	NA	NA	0	622
TCGA-BA-A6DA	HNSC	41	FEMALE	WHITE	Stage IVA	Head & Neck Squamous Cell Carcinoma	G2	2012		-15004	Alive	TUMOR FREE	351	NA					NA	Complete Remission/Response			0	351	0	351	NA	NA	0	351
TCGA-BA-A6DB	HNSC	24	FEMALE	WHITE	Stage II	Head & Neck Squamous Cell Carcinoma	G1	2012		-8967	Alive	WITH TUMOR	216	NA		Locoregional Disease	Cervical Lymph Nodes		208	Complete Remission/Response			0	216	0	216	1	208	1	208
TCGA-BA-A6DE	HNSC	70	FEMALE	WHITE	Stage III	Head & Neck Squamous Cell Carcinoma	G2	2013		-25874	Alive	TUMOR FREE	440	NA					NA	Complete Remission/Response			0	440	0	440	0	440	0	440
TCGA-BA-A6DJ	HNSC	62	MALE	ASIAN	Stage IVA	Head & Neck Squamous Cell Carcinoma	G2	2012		-22967	Dead	WITH TUMOR	NA	407			Distant Metastasis	Lungs	240	Complete Remission/Response			1	407	1	407	NA	NA	1	240
TCGA-BA-A8YP	HNSC	50	MALE	BLACK OR AFRICAN AMERICAN	Stage IVB	Head & Neck Squamous Cell Carcinoma	G2	2013		-18355	Alive	TUMOR FREE	499	NA					NA	Complete Remission/Response			0	499	0	499	NA	NA	0	499
TCGA-BB-4225	HNSC	73	MALE	WHITE	Stage IVA	Head & Neck Squamous Cell Carcinoma	G3	2003		-26687	Alive	WITH TUMOR	146	NA					NA	Partial Remission/Response			0	146	0	146	NA	NA	0	146
TCGA-BB-4228	HNSC	50	MALE	WHITE	Stage II	Head & Neck Squamous Cell Carcinoma	GX	2010		-18536	Alive	TUMOR FREE	559	NA					NA	Complete Remission/Response			0	559	0	559	0	559	0	559
TCGA-BB-8596	HNSC	69	FEMALE	WHITE	Stage IVA	Head & Neck Squamous Cell Carcinoma	G3	2005		-25408	Alive	TUMOR FREE	2161	NA					NA	Complete Remission/Response			0	2161	0	2161	NA	NA	0	2161
TCGA-BB-8601	HNSC	84	MALE	BLACK OR AFRICAN AMERICAN	Stage II	Head & Neck Squamous Cell Carcinoma	G2	2010		-30721	Alive	WITH TUMOR	624	NA		Locoregional Disease	Oral Cavity		440	Progressive Disease			0	624	0	624	NA	NA	1	440
TCGA-BB-A5HU	HNSC	47	MALE	WHITE	Stage IVA	Head & Neck Squamous Cell Carcinoma	G2	2012		-17502	Alive	TUMOR FREE	782	NA					NA	Complete Remission/Response			0	782	0	782	NA	NA	0	782
TCGA-BB-A5HZ	HNSC	65	MALE	WHITE	Stage IVA	Head & Neck Squamous Cell Carcinoma	G2	2012		-23906	Alive	WITH TUMOR	827	NA		Distant Metastasis	Distant Metastasis	Adrenal Gland	438	Complete Remission/Response			0	827	0	827	NA	NA	1	438
TCGA-BB-A6UO	HNSC	61	FEMALE	WHITE	Stage IVA	Head & Neck Squamous Cell Carcinoma	G2	2012		-22506	Dead	WITH TUMOR	NA	268			Distant Metastasis	Lung	212	Complete Remission/Response			1	268	1	268	NA	NA	1	212
TCGA-C9-A47Z	HNSC	72	FEMALE	ASIAN	Stage III	Head & Neck Squamous Cell Carcinoma	G1	2011		-26592	Dead	TUMOR FREE	NA	191					NA	Complete Remission/Response			1	191	0	191	0	191	0	191
TCGA-CN-4723	HNSC	67	MALE	WHITE	Stage IVA	Head & Neck Squamous Cell Carcinoma	G2	2010		-24815	Alive	TUMOR FREE	1699	NA					NA	Complete Remission/Response			0	1699	0	1699	NA	NA	0	1699
TCGA-CN-4725	HNSC	60	MALE	WHITE	Stage II	Head & Neck Squamous Cell Carcinoma	G2	2010		-22171	Alive	TUMOR FREE	1157	NA					NA	Complete Remission/Response			0	1157	0	1157	0	1157	0	1157
TCGA-CN-4727	HNSC	56	MALE	WHITE	Stage IVA	Head & Neck Squamous Cell Carcinoma	G2	2010		-20748	Alive	TUMOR FREE	1560	NA					NA	Complete Remission/Response			0	1560	0	1560	NA	NA	0	1560
TCGA-CN-4728	HNSC	56	MALE	WHITE	Stage IVA	Head & Neck Squamous Cell Carcinoma	G2	2010		-20660	Alive	TUMOR FREE	1724	NA					NA	Complete Remission/Response			0	1724	0	1724	NA	NA	0	1724
TCGA-CN-4729	HNSC	73	MALE	WHITE	Stage IVA	Head & Neck Squamous Cell Carcinoma	G2	2010		-26713	Alive	TUMOR FREE	392	NA					NA	Complete Remission/Response			0	392	0	392	NA	NA	0	392
TCGA-CN-4734	HNSC	70	MALE	WHITE	Stage II	Head & Neck Squamous Cell Carcinoma	G2	2010		-25753	Alive	TUMOR FREE	1690	NA					NA	Complete Remission/Response			0	1690	0	1690	0	1690	0	1690
TCGA-CN-4737	HNSC	19	MALE	WHITE	Stage II	Head & Neck Squamous Cell Carcinoma	G2	2010		-7301	Alive	TUMOR FREE	625	NA					NA	Complete Remission/Response			0	625	0	625	NA	NA	0	625
TCGA-CN-4738	HNSC	53	MALE	WHITE	Stage IVA	Head & Neck Squamous Cell Carcinoma	G2	2009		-19621	Dead		NA	436					NA				1	436	NA	436	NA	NA	0	436
TCGA-CN-4740	HNSC	79	FEMALE	WHITE	Stage IVA	Head & Neck Squamous Cell Carcinoma	G2	2009		-29186	Dead	WITH TUMOR	NA	839				PTERYGOID FOSSA	224	Complete Remission/Response			1	839	1	839	NA	NA	1	224
TCGA-CN-4741	HNSC	75	MALE	WHITE	Stage IVA	Head & Neck Squamous Cell Carcinoma	G2	2008		-27506	Alive	TUMOR FREE	2239	NA		Locoregional Recurrence	Cervical Lymph Nodes	R NECK	1716	Complete Remission/Response			0	2239	0	2239	NA	NA	1	1716
TCGA-CN-4742	HNSC	48	FEMALE	WHITE	Stage IVA	Head & Neck Squamous Cell Carcinoma	G3	2008		-17793	Dead	WITH TUMOR	NA	397					NA	Progressive Disease			1	397	1	397	NA	NA	1	397
TCGA-CN-5355	HNSC	64	MALE	BLACK OR AFRICAN AMERICAN	Stage IVA	Head & Neck Squamous Cell Carcinoma	G2	2010		-23670	Alive	TUMOR FREE	1278	NA					NA	Complete Remission/Response			0	1278	0	1278	NA	NA	0	1278
TCGA-CN-5356	HNSC	56	MALE	WHITE	Stage III	Head & Neck Squamous Cell Carcinoma	G2	2010		-20540	Alive	TUMOR FREE	1409	NA					NA	Complete Remission/Response			0	1409	0	1409	0	1409	0	1409
TCGA-CN-5358	HNSC	60	MALE	WHITE	Stage III	Head & Neck Squamous Cell Carcinoma	G2	2010		-22138	Dead	TUMOR FREE	NA	261			Cervical Lymph Nodes		145	Complete Remission/Response			1	261	0	261	1	145	1	145
TCGA-CN-5363	HNSC	48	MALE	BLACK OR AFRICAN AMERICAN	Stage IVB	Head & Neck Squamous Cell Carcinoma	G3	2007		-17635	Dead	WITH TUMOR	NA	253			Distant Metastasis	BONE	53	Complete Remission/Response			1	253	1	253	NA	NA	1	53
TCGA-CN-5364	HNSC	55	MALE	WHITE	Stage IVA	Head & Neck Squamous Cell Carcinoma	G2	2006		-20362	Dead	TUMOR FREE	NA	493					NA	Complete Remission/Response			1	493	0	493	NA	NA	0	493
TCGA-CN-5366	HNSC	51	MALE	WHITE	Stage IVA	Head & Neck Squamous Cell Carcinoma	G2	2006		-18904	Dead	WITH TUMOR	NA	360			Cervical Lymph Nodes	L NECK	276	Complete Remission/Response			1	360	1	360	NA	NA	1	276
TCGA-CN-5370	HNSC	78	MALE	WHITE	Stage II	Head & Neck Squamous Cell Carcinoma	G3	2006		-28549	Dead	WITH TUMOR	NA	259			Oral Cavity		123	Complete Remission/Response			1	259	1	259	1	123	1	123
TCGA-CN-5373	HNSC	55	FEMALE	WHITE	Stage II	Head & Neck Squamous Cell Carcinoma	G1	2010		-20143	Alive	TUMOR FREE	1584	NA					NA	Complete Remission/Response			0	1584	0	1584	0	1584	0	1584
TCGA-CN-6016	HNSC	64	MALE	WHITE	Stage IVA	Head & Neck Squamous Cell Carcinoma	G2	2010		-23664	Alive	TUMOR FREE	1443	NA					NA	Complete Remission/Response			0	1443	0	1443	NA	NA	0	1443
TCGA-CN-6018	HNSC	85	FEMALE	WHITE	Stage IVA	Head & Neck Squamous Cell Carcinoma	G2	2011		-31242	Dead	TUMOR FREE	NA	580					NA	Complete Remission/Response			1	580	0	580	NA	NA	0	580
TCGA-CN-6019	HNSC	61	MALE	WHITE	Stage IVA	Head & Neck Squamous Cell Carcinoma	G2	2011		-22485	Alive	TUMOR FREE	1038	NA					NA	Complete Remission/Response			0	1038	0	1038	NA	NA	0	1038
TCGA-CN-6988	HNSC	47	MALE	WHITE	Stage IVA	Head & Neck Squamous Cell Carcinoma	G3	2011		-17308	Alive	TUMOR FREE	318	NA					NA	Complete Remission/Response			0	318	0	318	NA	NA	0	318
TCGA-CN-6992	HNSC	61	MALE	WHITE	Stage IVA	Head & Neck Squamous Cell Carcinoma	G2	2011		-22598	Alive	TUMOR FREE	1066	NA					NA	Complete Remission/Response			0	1066	0	1066	NA	NA	0	1066
TCGA-CN-6996	HNSC	58	FEMALE	WHITE	Stage IVA	Head & Neck Squamous Cell Carcinoma	G2	2011		-21447	Dead	WITH TUMOR	NA	530			Cervical Lymph Nodes	SUPRASTERNAL NOTCH NODE	350	Complete Remission/Response			1	530	1	530	NA	NA	1	350
TCGA-CN-6998	HNSC	53	MALE	WHITE	Stage IVA	Head & Neck Squamous Cell Carcinoma	G2	2011		-19447	Dead	WITH TUMOR	NA	357			Oropharynx	tonsil	244	Progressive Disease			1	357	1	357	NA	NA	1	244
TCGA-CN-A497	HNSC	63	MALE		Stage IVA	Head & Neck Squamous Cell Carcinoma	G2	2011		-23310	Alive	TUMOR FREE	1065	NA					NA	Complete Remission/Response			0	1065	0	1065	NA	NA	0	1065
TCGA-CN-A49C	HNSC	67	MALE	WHITE	Stage IVA	Head & Neck Squamous Cell Carcinoma	GX	2012		-24495	Alive	TUMOR FREE	645	NA					NA	Complete Remission/Response			0	645	0	645	NA	NA	0	645
TCGA-CN-A642	HNSC	57	MALE	WHITE	Stage IVA	Head & Neck Squamous Cell Carcinoma	G3	2012		-21011	Dead	WITH TUMOR	NA	82					NA	Progressive Disease			1	82	1	82	NA	NA	1	82
TCGA-CN-A6UY	HNSC	57	MALE	WHITE	Stage IVA	Head & Neck Squamous Cell Carcinoma	G2	2012		-20967	Alive	TUMOR FREE	713	NA					NA	Complete Remission/Response			0	713	0	713	NA	NA	0	713
TCGA-CN-A6V6	HNSC	59	MALE	WHITE	Stage IVA	Head & Neck Squamous Cell Carcinoma	GX	2013		-21811	Alive	TUMOR FREE	635	NA					NA	Complete Remission/Response			0	635	0	635	NA	NA	0	635
TCGA-CQ-5323	HNSC	82	MALE	WHITE	Stage III	Head & Neck Squamous Cell Carcinoma	G2	2007		-30173	Alive	TUMOR FREE	1466	NA					NA	Complete Remission/Response			0	1466	0	1466	0	1466	0	1466
TCGA-CQ-5324	HNSC	59	MALE	WHITE	Stage IVA	Head & Neck Squamous Cell Carcinoma	G2	2007		-21803	Alive	TUMOR FREE	1593	NA					NA	Complete Remission/Response			0	1593	0	1593	NA	NA	0	1593
TCGA-CQ-5325	HNSC	65	MALE	WHITE	Stage I	Head & Neck Squamous Cell Carcinoma	G2	2007		-23833	Dead	WITH TUMOR	NA	654			Oral Cavity		204	Complete Remission/Response			1	654	1	654	1	204	1	204
TCGA-CQ-5327	HNSC	61	FEMALE	ASIAN	Stage IVA	Head & Neck Squamous Cell Carcinoma	G2	2008		-22307	Alive	TUMOR FREE	1660	NA					NA	Complete Remission/Response			0	1660	0	1660	NA	NA	0	1660
TCGA-CQ-5329	HNSC	46	FEMALE	WHITE	Stage III	Head & Neck Squamous Cell Carcinoma	G2	2008		-17028	Alive	TUMOR FREE	2143	NA					NA	Complete Remission/Response			0	2143	0	2143	0	2143	0	2143
TCGA-CQ-5332	HNSC	87	MALE	WHITE	Stage III	Head & Neck Squamous Cell Carcinoma	G2	2008		-32032	Dead		317	317					NA				1	317	NA	317	NA	NA	0	317
TCGA-CQ-5333	HNSC	74	MALE	WHITE	Stage I	Head & Neck Squamous Cell Carcinoma	G3	2008		-27110	Dead	WITH TUMOR	NA	341			Oropharynx		176	Complete Remission/Response			1	341	1	341	1	176	1	176
TCGA-CQ-5334	HNSC	87	MALE	WHITE	Stage IVB	Head & Neck Squamous Cell Carcinoma	G2	2008		-32024	Dead	WITH TUMOR	NA	129			Oral Cavity		50	Progressive Disease			1	129	1	129	NA	NA	1	50
TCGA-CQ-6219	HNSC	50	FEMALE	WHITE	Stage IVA	Head & Neck Squamous Cell Carcinoma	G2	2007		-18578	Dead	WITH TUMOR	NA	479			Cervical Lymph Nodes		195	Complete Remission/Response			1	479	1	479	NA	NA	1	195
TCGA-CQ-6220	HNSC	69	MALE	WHITE	Stage III	Head & Neck Squamous Cell Carcinoma	G2	2007		-25366	Dead		NA	985					NA	Complete Remission/Response			1	985	NA	985	0	985	0	985
TCGA-CQ-6222	HNSC	63	MALE	WHITE	Stage IVA	Head & Neck Squamous Cell Carcinoma	G2	2008		-23326	Alive	TUMOR FREE	2016	NA					NA	Complete Remission/Response			0	2016	0	2016	NA	NA	0	2016
TCGA-CQ-6223	HNSC	69	MALE	WHITE	Stage IVA	Head & Neck Squamous Cell Carcinoma	G2	2008		-25266	Alive	TUMOR FREE	1428	NA					NA	Complete Remission/Response			0	1428	0	1428	NA	NA	0	1428
TCGA-CQ-6225	HNSC	65	MALE	WHITE	Stage II	Head & Neck Squamous Cell Carcinoma	G2	2008		-23988	Dead		NA	403			Oral Cavity		180	Persistent Disease			1	403	NA	403	NA	NA	1	180
TCGA-CQ-7063	HNSC	59	FEMALE	WHITE		Head & Neck Squamous Cell Carcinoma	G1	2008		-21723	Alive	TUMOR FREE	2133	NA		Locoregional Disease	Oral Cavity	left oral tongue	1160	Complete Remission/Response			0	2133	0	2133	1	1160	1	1160
TCGA-CQ-7065	HNSC	40	MALE	ASIAN	Stage II	Head & Neck Squamous Cell Carcinoma	G2	2009		-14676	Alive	TUMOR FREE	1628	NA			Oral Cavity		230	Complete Remission/Response			0	1628	0	1628	1	230	1	230
TCGA-CQ-7069	HNSC	77	FEMALE	WHITE	Stage II	Head & Neck Squamous Cell Carcinoma	G2	2010		-28138	Alive	TUMOR FREE	1274	NA					NA	Complete Remission/Response			0	1274	0	1274	0	1274	0	1274
TCGA-CQ-7071	HNSC	76	FEMALE	WHITE	Stage IVA	Head & Neck Squamous Cell Carcinoma	G2	2010		-27928	Alive	TUMOR FREE	1311	NA					NA	Complete Remission/Response			0	1311	0	1311	NA	NA	0	1311
TCGA-CQ-A4C9	HNSC	56	MALE	[Not Evaluated]		Head & Neck Squamous Cell Carcinoma	G2	2011		-20732	Alive	WITH TUMOR	707	NA		Locoregional Disease	Oral Cavity		287	Complete Remission/Response			0	707	0	707	1	287	1	287
TCGA-CQ-A4CD	HNSC	69	MALE	WHITE	Stage IVB	Head & Neck Squamous Cell Carcinoma	G3	2011		-25497	Alive	TUMOR FREE	1022	NA					NA	Complete Remission/Response			0	1022	0	1022	NA	NA	0	1022
TCGA-CQ-A4CG	HNSC	78	FEMALE	WHITE	Stage II	Head & Neck Squamous Cell Carcinoma	G2	2011		-28637	Dead	WITH TUMOR	NA	430			Distant Metastasis	new primary in left upper lung lobe with metastasis to brain	350	Complete Remission/Response			1	430	1	430	1	350	1	350
TCGA-CQ-A4CH	HNSC	58	MALE	ASIAN	Stage IVA	Head & Neck Squamous Cell Carcinoma	G2	2012		-21455	Dead	WITH TUMOR	NA	379				trachea	210	Complete Remission/Response			1	379	1	379	NA	NA	1	210
TCGA-CR-5243	HNSC	51	MALE	WHITE	Stage IVA	Head & Neck Squamous Cell Carcinoma	G3	2003		-18812	Alive	TUMOR FREE	2562	NA					NA	Complete Remission/Response			0	2562	0	2562	NA	NA	0	2562
TCGA-CR-5249	HNSC	35	FEMALE	WHITE	Stage II	Head & Neck Squamous Cell Carcinoma	GX	2007		-13047	Alive	TUMOR FREE	1152	NA					NA	Complete Remission/Response			0	1152	0	1152	0	1152	0	1152
TCGA-CR-5250	HNSC	71	MALE	WHITE	Stage II	Head & Neck Squamous Cell Carcinoma	G3	2009		-26097	Alive	TUMOR FREE	799	NA					NA	Complete Remission/Response			0	799	0	799	0	799	0	799
TCGA-CR-6467	HNSC	59	MALE	WHITE	Stage IVA	Head & Neck Squamous Cell Carcinoma	G3	2006		-21689	Alive	TUMOR FREE	1777	NA					NA	Complete Remission/Response			0	1777	0	1777	NA	NA	0	1777
TCGA-CR-6477	HNSC	56	FEMALE	WHITE	Stage IVA	Head & Neck Squamous Cell Carcinoma	G2	2010		-20815	Alive	TUMOR FREE	514	NA					NA	Complete Remission/Response			0	514	0	514	NA	NA	0	514
TCGA-CR-6480	HNSC	53	MALE	WHITE	Stage IVA	Head & Neck Squamous Cell Carcinoma	G2	2010		-19472	Alive	TUMOR FREE	362	NA					NA	Complete Remission/Response			0	362	0	362	NA	NA	0	362
TCGA-CR-6481	HNSC	47	MALE	WHITE	Stage IVA	Head & Neck Squamous Cell Carcinoma	G2	2010		-17203	Alive	TUMOR FREE	311	NA					NA	Complete Remission/Response			0	311	0	311	NA	NA	0	311
TCGA-CR-6484	HNSC	67	FEMALE	ASIAN	Stage IVA	Head & Neck Squamous Cell Carcinoma	G2	2010		-24569	Alive	TUMOR FREE	354	NA					NA	Complete Remission/Response			0	354	0	354	NA	NA	0	354
TCGA-CR-6487	HNSC	50	MALE	WHITE	Stage II	Head & Neck Squamous Cell Carcinoma	G3	2010		-18331	Alive	TUMOR FREE	234	NA					NA	Complete Remission/Response			0	234	0	234	0	234	0	234
TCGA-CR-6488	HNSC	68	FEMALE	WHITE	Stage II	Head & Neck Squamous Cell Carcinoma	G2	2010		-25176	Alive	TUMOR FREE	379	NA					NA	Complete Remission/Response			0	379	0	379	0	379	0	379
TCGA-CR-6491	HNSC	60	MALE	BLACK OR AFRICAN AMERICAN	Stage IVA	Head & Neck Squamous Cell Carcinoma	G2	2010		-22125	Alive	WITH TUMOR	693	NA		New Primary Tumor	Distant Metastasis	Lung	499	Complete Remission/Response			0	693	0	693	NA	NA	1	499
TCGA-CR-6492	HNSC	78	MALE	WHITE	Stage IVA	Head & Neck Squamous Cell Carcinoma	G3	2010		-28600	Alive	TUMOR FREE	479	NA					NA	Complete Remission/Response			0	479	0	479	NA	NA	0	479
TCGA-CR-7365	HNSC	60	MALE	WHITE	Stage IVA	Head & Neck Squamous Cell Carcinoma	G2	2008		-22101	Alive	TUMOR FREE	1191	NA					NA	Complete Remission/Response			0	1191	0	1191	NA	NA	0	1191
TCGA-CR-7371	HNSC	45	FEMALE	WHITE	Stage III	Head & Neck Squamous Cell Carcinoma	G2	2009		-16568	Dead		NA	94					NA				1	94	NA	94	NA	NA	0	94
TCGA-CR-7373	HNSC	66	MALE	WHITE	Stage IVA	Head & Neck Squamous Cell Carcinoma	G2	2009		-24448	Alive	TUMOR FREE	889	NA					NA	Complete Remission/Response			0	889	0	889	NA	NA	0	889
TCGA-CR-7379	HNSC	78	FEMALE	WHITE	Stage IVA	Head & Neck Squamous Cell Carcinoma	G2	2009		-28763	Alive	TUMOR FREE	1036	NA					NA	Complete Remission/Response			0	1036	0	1036	NA	NA	0	1036
TCGA-CR-7380	HNSC	58	MALE	WHITE	Stage III	Head & Neck Squamous Cell Carcinoma	G2	2010		-21215	Dead	WITH TUMOR	NA	606			Distant Metastasis	Lung	561	Complete Remission/Response			1	606	1	606	NA	NA	1	561
TCGA-CR-7383	HNSC	79	FEMALE	WHITE	Stage I	Head & Neck Squamous Cell Carcinoma	G2	2008		-29122	Dead	WITH TUMOR	NA	521			Oropharynx		454	Complete Remission/Response			1	521	1	521	1	454	1	454
TCGA-CR-7386	HNSC	69	MALE	WHITE	Stage IVA	Head & Neck Squamous Cell Carcinoma	G1	2008		-25238	Alive	WITH TUMOR	1430	NA			Distant Metastasis	Lung (distant mets or possible new primary)	1028	Complete Remission/Response			0	1430	0	1430	NA	NA	1	1028
TCGA-CR-7388	HNSC	70	FEMALE	WHITE	Stage IVA	Head & Neck Squamous Cell Carcinoma	G2	2008		-25728	Dead	WITH TUMOR	NA	823			Cervical Lymph Nodes	Right neck	334	Complete Remission/Response			1	823	1	823	NA	NA	1	334
TCGA-CR-7389	HNSC	55	MALE	BLACK OR AFRICAN AMERICAN	Stage III	Head & Neck Squamous Cell Carcinoma	G2	2007		-20169	Alive	TUMOR FREE	392	NA					NA	Complete Remission/Response			0	392	0	392	0	392	0	392
TCGA-CR-7390	HNSC	67	MALE	WHITE	Stage III	Head & Neck Squamous Cell Carcinoma	G2	2009		-24575	Alive	TUMOR FREE	1508	NA					NA	Complete Remission/Response			0	1508	0	1508	NA	NA	0	1508
TCGA-CR-7393	HNSC	26	MALE	WHITE	Stage I	Head & Neck Squamous Cell Carcinoma	G2	2009		-9750	Alive	TUMOR FREE	993	NA					NA	Complete Remission/Response			0	993	0	993	0	993	0	993
TCGA-CR-7395	HNSC	80	FEMALE	WHITE	Stage II	Head & Neck Squamous Cell Carcinoma	G2	2009		-29527	Alive	TUMOR FREE	930	NA					NA	Complete Remission/Response			0	930	0	930	0	930	0	930
TCGA-CR-7397	HNSC	44	MALE	WHITE	Stage IVA	Head & Neck Squamous Cell Carcinoma	G2	2011		-16351	Alive	TUMOR FREE	754	NA					NA	Complete Remission/Response			0	754	0	754	NA	NA	0	754
TCGA-CR-7401	HNSC	64	MALE	WHITE	Stage I	Head & Neck Squamous Cell Carcinoma	G2	2008		-23420	Alive	TUMOR FREE	1077	NA					NA	Complete Remission/Response			0	1077	0	1077	0	1077	0	1077
TCGA-CR-7402	HNSC	68	MALE	WHITE	Stage III	Head & Neck Squamous Cell Carcinoma	G2	2009		-25138	Alive	TUMOR FREE	911	NA					NA	Complete Remission/Response			0	911	0	911	0	911	0	911
TCGA-CR-7404	HNSC	53	MALE	WHITE	Stage IVA	Head & Neck Squamous Cell Carcinoma	G2	2008		-19532	Alive	WITH TUMOR	1472	NA			Oropharynx		234	Complete Remission/Response			0	1472	0	1472	NA	NA	1	234
TCGA-CV-5431	HNSC	73	MALE	WHITE	Stage IVA	Head & Neck Squamous Cell Carcinoma	G3	2000		-26953	Dead	TUMOR FREE	522	522					NA	Complete Remission/Response			1	522	0	522	NA	NA	0	522
TCGA-CV-5436	HNSC	65	MALE		Stage IVA	Head & Neck Squamous Cell Carcinoma	G2	2001		-23923	Dead	WITH TUMOR	548	584					NA	Persistent Disease			1	584	1	584	NA	NA	1	584
TCGA-CV-5443	HNSC	63	MALE	BLACK OR AFRICAN AMERICAN	Stage III	Head & Neck Squamous Cell Carcinoma	G3	2004		-23287	Alive	TUMOR FREE	2784	NA					NA				0	2784	0	2784	NA	NA	0	2784
TCGA-CV-5444	HNSC	64	MALE	BLACK OR AFRICAN AMERICAN	Stage IVA	Head & Neck Squamous Cell Carcinoma	G3	2004		-23650	Alive	TUMOR FREE	2437	NA					NA				0	2437	0	2437	NA	NA	0	2437
TCGA-CV-5966	HNSC	63	FEMALE	WHITE	Stage IVA	Head & Neck Squamous Cell Carcinoma	G3	2005		-23119	Dead	TUMOR FREE	NA	545					NA	Complete Remission/Response			1	545	0	545	NA	NA	0	545
TCGA-CV-5970	HNSC	59	MALE	WHITE	Stage IVA	Head & Neck Squamous Cell Carcinoma	G2	2009		-21890	Dead	WITH TUMOR	406	406					NA				1	406	1	406	NA	NA	1	406
TCGA-CV-5973	HNSC	62	FEMALE	WHITE	Stage III	Head & Neck Squamous Cell Carcinoma	G3	2005		-22771	Alive	TUMOR FREE	2641	NA					NA	Complete Remission/Response			0	2641	0	2641	0	2641	0	2641
TCGA-CV-5976	HNSC	50	MALE	WHITE	Stage III	Head & Neck Squamous Cell Carcinoma	G2	2006		-18267	Alive	TUMOR FREE	1478	NA					NA				0	1478	0	1478	NA	NA	0	1478
TCGA-CV-6003	HNSC	50	FEMALE	WHITE	Stage II	Head & Neck Squamous Cell Carcinoma	G2	2007		-18600	Alive	TUMOR FREE	1665	NA					NA				0	1665	0	1665	NA	NA	0	1665
TCGA-CV-6433	HNSC	57	MALE	WHITE	Stage II	Head & Neck Squamous Cell Carcinoma	G3	2010		-20855	Alive	WITH TUMOR	641	NA					NA	Complete Remission/Response			0	641	0	641	0	641	0	641
TCGA-CV-6933	HNSC	53	MALE	WHITE	Stage IVA	Head & Neck Squamous Cell Carcinoma	G2	1998		-19518	Dead	TUMOR FREE	NA	2741					NA				1	2741	0	2741	NA	NA	0	2741
TCGA-CV-6934	HNSC	66	FEMALE	WHITE	Stage IVA	Head & Neck Squamous Cell Carcinoma	G2	1998		-24180	Dead	WITH TUMOR	NA	65					NA	Complete Remission/Response			1	65	1	65	NA	NA	1	65
TCGA-CV-6941	HNSC	51	MALE	WHITE	Stage III	Head & Neck Squamous Cell Carcinoma	G2	1999		-18812	Dead	TUMOR FREE	NA	342					NA	Complete Remission/Response			1	342	0	342	0	342	0	342
TCGA-CV-6943	HNSC	74	MALE	WHITE	Stage III	Head & Neck Squamous Cell Carcinoma	G2	1999		-27310	Dead	WITH TUMOR	NA	602					NA				1	602	1	602	NA	NA	1	602
TCGA-CV-6945	HNSC	41	MALE	WHITE	Stage IVA	Head & Neck Squamous Cell Carcinoma	G2	1993		-15158	Dead	WITH TUMOR	NA	366					NA				1	366	1	366	NA	NA	1	366
TCGA-CV-6948	HNSC	79	FEMALE	WHITE	Stage IVA	Head & Neck Squamous Cell Carcinoma	G2	1994		-29153	Dead	TUMOR FREE	NA	1289					NA				1	1289	0	1289	NA	NA	0	1289
TCGA-CV-6950	HNSC	64	MALE	WHITE	Stage IVA	Head & Neck Squamous Cell Carcinoma	G2	1994		-23549	Dead	WITH TUMOR	NA	459		Locoregional Recurrence	Oral Cavity	Tonsil	258	Complete Remission/Response			1	459	1	459	NA	NA	1	258
TCGA-CV-6952	HNSC	65	FEMALE	WHITE	Stage III	Head & Neck Squamous Cell Carcinoma	G1	1996		-23892	Dead	TUMOR FREE	NA	185					NA				1	185	0	185	NA	NA	0	185
TCGA-CV-6954	HNSC	59	MALE	BLACK OR AFRICAN AMERICAN	Stage IVA	Head & Neck Squamous Cell Carcinoma	G2	1998		-21557	Dead	TUMOR FREE	NA	2002					NA	Complete Remission/Response			1	2002	0	2002	NA	NA	0	2002
TCGA-CV-6959	HNSC	48	MALE	WHITE	Stage III	Head & Neck Squamous Cell Carcinoma	G2	1999		-17679	Dead	WITH TUMOR	NA	256		Locoregional Recurrence		Rt. Neck mass, skin	103				1	256	1	256	NA	NA	1	103
TCGA-CV-6960	HNSC	49	MALE	BLACK OR AFRICAN AMERICAN	Stage III	Head & Neck Squamous Cell Carcinoma	G3	1999		-18194	Dead	TUMOR FREE	NA	862					NA				1	862	0	862	NA	NA	0	862
TCGA-CV-6961	HNSC	61	MALE	WHITE	Stage II	Head & Neck Squamous Cell Carcinoma	G3	1999		-22532	Dead	WITH TUMOR	NA	76					NA	Complete Remission/Response			1	76	1	76	NA	NA	1	76
TCGA-CV-7089	HNSC	74	MALE	WHITE	Stage IVA	Head & Neck Squamous Cell Carcinoma	G2	2001		-27149	Dead	TUMOR FREE	NA	1972					NA				1	1972	0	1972	NA	NA	0	1972
TCGA-CV-7099	HNSC	85	FEMALE	WHITE	Stage II	Head & Neck Squamous Cell Carcinoma	G2	2002		-31134	Dead	TUMOR FREE	NA	243					NA	Complete Remission/Response			1	243	0	243	0	243	0	243
TCGA-CV-7100	HNSC	66	MALE	WHITE	Stage II	Head & Neck Squamous Cell Carcinoma	G3	2001		-24183	Dead	WITH TUMOR	NA	274					NA				1	274	1	274	NA	NA	1	274
TCGA-CV-7101	HNSC	80	MALE	WHITE	Stage II	Head & Neck Squamous Cell Carcinoma	G2	1999		-29550	Dead	TUMOR FREE	NA	160					NA				1	160	0	160	NA	NA	0	160
TCGA-CV-7104	HNSC	61	FEMALE	WHITE	Stage IVA	Head & Neck Squamous Cell Carcinoma	G2	2000		-22349	Dead	TUMOR FREE	NA	393					NA	Complete Remission/Response			1	393	0	393	NA	NA	0	393
TCGA-CV-7177	HNSC	82	FEMALE	WHITE	Stage I	Head & Neck Squamous Cell Carcinoma	G2	1999		-30180	Dead	WITH TUMOR	NA	663					NA				1	663	1	663	NA	NA	1	663
TCGA-CV-7180	HNSC	34	MALE	WHITE	Stage II	Head & Neck Squamous Cell Carcinoma	G2	1996		-12523	Dead	WITH TUMOR	NA	327					NA				1	327	1	327	NA	NA	1	327
TCGA-CV-7235	HNSC	67	MALE	WHITE	Stage III	Head & Neck Squamous Cell Carcinoma	G3	2007		-24800	Alive	TUMOR FREE	2347	NA					NA	Complete Remission/Response			0	2347	0	2347	0	2347	0	2347
TCGA-CV-7245	HNSC	62	MALE	WHITE	Stage III	Head & Neck Squamous Cell Carcinoma	G2	2009		-22646	Alive	TUMOR FREE	797	NA					NA				0	797	0	797	NA	NA	0	797
TCGA-CV-7250	HNSC	64	MALE	WHITE	Stage III	Head & Neck Squamous Cell Carcinoma	G1	2000		-23489	Dead	TUMOR FREE	NA	2900		Distant Metastasis	Distant Metastasis	suprasternal	111	Complete Remission/Response			1	2900	0	2900	NA	NA	1	111
TCGA-CV-7255	HNSC	32	FEMALE	WHITE	Stage II	Head & Neck Squamous Cell Carcinoma	G2	1995		-11931	Dead	WITH TUMOR	NA	64					NA	Complete Remission/Response			1	64	1	64	NA	NA	1	64
TCGA-CV-7261	HNSC	57	MALE	WHITE	Stage III	Head & Neck Squamous Cell Carcinoma	G2	2008		-20992	Alive	TUMOR FREE	1512	NA					NA				0	1512	0	1512	NA	NA	0	1512
TCGA-CV-7263	HNSC	64	MALE	BLACK OR AFRICAN AMERICAN	Stage II	Head & Neck Squamous Cell Carcinoma	G1	1997		-23513	Dead	WITH TUMOR	NA	560					NA				1	560	1	560	NA	NA	1	560
TCGA-CV-7407	HNSC	67	FEMALE	WHITE	Stage II	Head & Neck Squamous Cell Carcinoma	G2	1992		-24475	Dead		NA	1081					NA				1	1081	NA	1081	NA	NA	0	1081
TCGA-CV-7413	HNSC	74	FEMALE	WHITE	Stage II	Head & Neck Squamous Cell Carcinoma	G2	1995		-27231	Dead		NA	294					NA	Complete Remission/Response			1	294	NA	294	0	294	0	294
TCGA-CV-7422	HNSC	60	FEMALE	WHITE	Stage IVA	Head & Neck Squamous Cell Carcinoma	G3	1997		-22098	Dead	WITH TUMOR	NA	1037		Locoregional Recurrence	Larynx	tracheal	733	Complete Remission/Response			1	1037	1	1037	NA	NA	1	733
TCGA-CV-7423	HNSC	65	MALE	WHITE	Stage II	Head & Neck Squamous Cell Carcinoma	G1	1997		-24071	Dead		NA	3059					NA				1	3059	NA	3059	NA	NA	0	3059
TCGA-CV-7424	HNSC	67	MALE	ASIAN	Stage IVA	Head & Neck Squamous Cell Carcinoma	G2	1997		-24775	Dead	WITH TUMOR	NA	453					NA				1	453	1	453	NA	NA	1	453
TCGA-CV-7425	HNSC	77	FEMALE	WHITE	Stage III	Head & Neck Squamous Cell Carcinoma	G1	2000		-28368	Dead	WITH TUMOR	NA	1718					NA				1	1718	1	1718	NA	NA	1	1718
TCGA-CV-7428	HNSC	47	MALE	WHITE	Stage IVA	Head & Neck Squamous Cell Carcinoma	G2	1998		-17429	Dead	WITH TUMOR	NA	1671					NA				1	1671	1	1671	NA	NA	1	1671
TCGA-CV-7429	HNSC	55	MALE	WHITE	Stage III	Head & Neck Squamous Cell Carcinoma	G3	1998		-20188	Dead	WITH TUMOR	NA	107					NA	Partial Remission/Response			1	107	1	107	NA	NA	1	107
TCGA-CV-7430	HNSC	56	MALE	WHITE	Stage III	Head & Neck Squamous Cell Carcinoma	G2	1996		-20763	Dead	WITH TUMOR	NA	495					NA				1	495	1	495	NA	NA	1	495
TCGA-CV-7432	HNSC	79	MALE	WHITE	Stage III	Head & Neck Squamous Cell Carcinoma	G1	1998		-28875	Dead	WITH TUMOR	NA	2570					NA	Complete Remission/Response			1	2570	1	2570	NA	NA	1	2570
TCGA-CV-7433	HNSC	49	MALE	WHITE	Stage IVA	Head & Neck Squamous Cell Carcinoma	G3	1999		-18004	Dead	WITH TUMOR	NA	601		Distant Metastasis	Distant Metastasis	Lt. Deltoid	445	Progressive Disease			1	601	1	601	NA	NA	1	445
TCGA-CV-7440	HNSC	38	MALE	WHITE	Stage II	Head & Neck Squamous Cell Carcinoma	GX	2000		-13992	Dead		NA	675					NA				1	675	NA	675	NA	NA	0	675
TCGA-CV-7568	HNSC	48	FEMALE	WHITE	Stage IVA	Head & Neck Squamous Cell Carcinoma	GX	1995		-17670	Dead		NA	927					NA				1	927	NA	927	NA	NA	0	927
TCGA-CV-A45P	HNSC	82	FEMALE	WHITE	Stage II	Head & Neck Squamous Cell Carcinoma	G2	1998		-30297	Alive	WITH TUMOR	639	NA		Locoregional Recurrence	Oral Cavity	Floor of mouth	639	Complete Remission/Response			0	639	0	639	1	639	1	639
TCGA-CV-A45Q	HNSC	69	FEMALE	WHITE	Stage IVC	Head & Neck Squamous Cell Carcinoma	G1	1995		-25379	Dead	TUMOR FREE	NA	5152					NA	Complete Remission/Response			1	5152	0	5152	NA	NA	0	5152
TCGA-CV-A45T	HNSC	64	FEMALE	WHITE	Stage II	Head & Neck Squamous Cell Carcinoma	G3	1998		-23452	Dead	TUMOR FREE	NA	4856					NA				1	4856	0	4856	NA	NA	0	4856
TCGA-CV-A45U	HNSC	59	MALE	WHITE	Stage IVA	Head & Neck Squamous Cell Carcinoma	G1	1999		-21746	Dead	WITH TUMOR	NA	1079			Distant Metastasis	pelvis	1064	Complete Remission/Response			1	1079	1	1079	NA	NA	1	1064
TCGA-CV-A45X	HNSC	47	MALE	WHITE	Stage IVA	Head & Neck Squamous Cell Carcinoma	G2	2000		-17464	Dead	TUMOR FREE	NA	198					NA	Complete Remission/Response			1	198	0	198	NA	NA	0	198
TCGA-CV-A45Z	HNSC	75	MALE	WHITE	Stage II	Head & Neck Squamous Cell Carcinoma	G3	2000		-27397	Dead	WITH TUMOR	NA	1466					NA				1	1466	1	1466	NA	NA	1	1466
TCGA-CV-A460	HNSC	72	MALE	WHITE	Stage IVA	Head & Neck Squamous Cell Carcinoma	G3	2001		-26539	Dead	[Discrepancy]	NA	1838		New Primary Tumor		mediastinum	1425	Complete Remission/Response			1	1838	NA	1838	NA	NA	1	1425
TCGA-CV-A464	HNSC	48	MALE	WHITE	Stage IVA	Head & Neck Squamous Cell Carcinoma	G2	2008		-17669	Alive	TUMOR FREE	1722	NA		Locoregional Disease		pterygoid	28	Complete Remission/Response			0	1722	0	1722	NA	NA	1	28
TCGA-CV-A6JD	HNSC	82	FEMALE	WHITE	Stage IVA	Head & Neck Squamous Cell Carcinoma	G3	2012		-29988	Dead	TUMOR FREE	NA	182					NA	Complete Remission/Response			1	182	0	182	NA	NA	0	182
TCGA-CV-A6JN	HNSC	53	MALE	WHITE	Stage II	Head & Neck Squamous Cell Carcinoma	G1	2011		-19635	Alive	TUMOR FREE	906	NA					NA	Complete Remission/Response			0	906	0	906	0	906	0	906
TCGA-CV-A6JO	HNSC	69	MALE	WHITE	Stage IVA	Head & Neck Squamous Cell Carcinoma	G2	2011		-25377	Dead	WITH TUMOR	NA	197			Oral Cavity	submandibular	127	Progressive Disease			1	197	1	197	NA	NA	1	127
TCGA-CV-A6JY	HNSC	69	MALE	WHITE	Stage IVA	Head & Neck Squamous Cell Carcinoma	G1	2011		-25321	Alive	TUMOR FREE	646	NA					NA	Complete Remission/Response			0	646	0	646	NA	NA	0	646
TCGA-CV-A6JZ	HNSC	68	MALE	WHITE	Stage IVA	Head & Neck Squamous Cell Carcinoma	G2	2011		-25182	Alive	WITH TUMOR	714	NA		Locoregional Recurrence	Oral Cavity	submandibular	393	Complete Remission/Response			0	714	0	714	NA	NA	1	393
TCGA-CV-A6K0	HNSC	58	MALE	WHITE	Stage II	Head & Neck Squamous Cell Carcinoma	G3	2011		-21488	Alive	TUMOR FREE	606	NA			Cervical Lymph Nodes	neck	146	Complete Remission/Response			0	606	0	606	1	146	1	146
TCGA-CV-A6K2	HNSC	79	MALE	WHITE	Stage II	Head & Neck Squamous Cell Carcinoma	G1	2011		-29114	Dead	WITH TUMOR	NA	317		Locoregional Recurrence		Infratemporal fossa	134	Progressive Disease			1	317	1	317	NA	NA	1	134
TCGA-CX-7082	HNSC	82	MALE	WHITE	Stage II	Head & Neck Squamous Cell Carcinoma	G2	2010		-30174	Dead	TUMOR FREE	NA	11					NA	Complete Remission/Response			1	11	0	11	NA	NA	0	11
TCGA-CX-7085	HNSC	77	FEMALE	WHITE	Stage III	Head & Neck Squamous Cell Carcinoma	G2	2010		-28221	Alive	WITH TUMOR	321	NA		Locoregional Recurrence	Oropharynx	Submandibular gland	92	Complete Remission/Response			0	321	0	321	1	92	1	92
TCGA-CX-A4AQ	HNSC	56	MALE	WHITE	Stage IVA	Head & Neck Squamous Cell Carcinoma	G3	2008		-20709	Alive	TUMOR FREE	1555	NA					NA	Complete Remission/Response			0	1555	0	1555	NA	NA	0	1555
TCGA-D6-6517	HNSC	59	MALE	WHITE	Stage III	Head & Neck Squamous Cell Carcinoma	G2	2010		-21791	Alive	WITH TUMOR	292	NA			Distant Metastasis	tracheostoma	161	Progressive Disease			0	292	0	292	NA	NA	1	161
TCGA-D6-6824	HNSC	61	MALE	WHITE	Stage IVA	Head & Neck Squamous Cell Carcinoma	G2	2010		-22633	Alive	TUMOR FREE	77	NA					NA	Complete Remission/Response			0	77	0	77	NA	NA	0	77
TCGA-D6-6825	HNSC	73	MALE	WHITE	Stage III	Head & Neck Squamous Cell Carcinoma	G2	2011		-26976	Alive	TUMOR FREE	491	NA					NA	Complete Remission/Response			0	491	0	491	0	491	0	491
TCGA-D6-6827	HNSC	55	FEMALE	WHITE	Stage III	Head & Neck Squamous Cell Carcinoma	G3	2011		-20175	Alive	TUMOR FREE	568	NA					NA	Complete Remission/Response			0	568	0	568	0	568	0	568
TCGA-D6-A4ZB	HNSC	61	MALE	WHITE	Stage III	Head & Neck Squamous Cell Carcinoma	G2	2012		-22455	Alive	TUMOR FREE	376	NA					NA	Complete Remission/Response			0	376	0	376	0	376	0	376
TCGA-D6-A6EM	HNSC	65	FEMALE	WHITE	Stage III	Head & Neck Squamous Cell Carcinoma	G2	2012		-23865	Alive	WITH TUMOR	232	NA			Oral Cavity	oral tongue	232	Complete Remission/Response			0	232	0	232	1	232	1	232
TCGA-D6-A6EN	HNSC	71	MALE	WHITE	Stage III	Head & Neck Squamous Cell Carcinoma	G3	2013		-26294	Alive	TUMOR FREE	687	NA					NA	Complete Remission/Response			0	687	0	687	0	687	0	687
TCGA-D6-A6EQ	HNSC	57	MALE	WHITE	Stage IVA	Head & Neck Squamous Cell Carcinoma	G3	2013		-20876	Alive	TUMOR FREE	368	NA					NA	Complete Remission/Response			0	368	0	368	NA	NA	0	368
TCGA-D6-A74Q	HNSC	67	MALE	WHITE	Stage IVA	Head & Neck Squamous Cell Carcinoma	G3	2013		-24702	Alive	TUMOR FREE	710	NA					NA	Complete Remission/Response			0	710	0	710	NA	NA	0	710
TCGA-DQ-5624	HNSC	43	FEMALE	WHITE	Stage IVA	Head & Neck Squamous Cell Carcinoma	G2	2007		-15867	Alive	TUMOR FREE	1778	NA					NA	Complete Remission/Response			0	1778	0	1778	NA	NA	0	1778
TCGA-DQ-5629	HNSC	64	MALE	WHITE	Stage IVA	Head & Neck Squamous Cell Carcinoma	G2	2009		-23550	Dead	TUMOR FREE	NA	941					NA	Complete Remission/Response			1	941	0	941	NA	NA	0	941
TCGA-DQ-7588	HNSC	66	MALE	WHITE	Stage III	Head & Neck Squamous Cell Carcinoma	G3	2010		-24106	Dead	WITH TUMOR	NA	427			Oral Cavity		79	Persistent Disease			1	427	1	427	NA	NA	1	79
TCGA-F7-7848	HNSC	47	MALE	WHITE	Stage IVA	Head & Neck Squamous Cell Carcinoma	G2	2011		-17251	Alive	TUMOR FREE	1131	NA					NA	Complete Remission/Response			0	1131	0	1131	NA	NA	0	1131
TCGA-F7-A50I	HNSC	72	MALE	WHITE		Head & Neck Squamous Cell Carcinoma	G2	2011		-26373	Alive	TUMOR FREE	92	NA					NA				0	92	0	92	NA	NA	0	92
TCGA-F7-A50J	HNSC	67	FEMALE	WHITE		Head & Neck Squamous Cell Carcinoma	G2	2011		-24758	Alive	TUMOR FREE	947	NA					NA	Complete Remission/Response			0	947	0	947	0	947	0	947
TCGA-F7-A61S	HNSC	62	MALE	WHITE		Head & Neck Squamous Cell Carcinoma	G1	2012		-22655	Alive	TUMOR FREE	576	NA		Locoregional Recurrence	Cervical Lymph Nodes		213	Complete Remission/Response			0	576	0	576	1	213	1	213
TCGA-F7-A623	HNSC	70	MALE	WHITE		Head & Neck Squamous Cell Carcinoma	G1	2012		-25592	Alive	TUMOR FREE	616	NA					NA	Complete Remission/Response			0	616	0	616	NA	NA	0	616
TCGA-H7-7774	HNSC	75	FEMALE	WHITE	Stage III	Head & Neck Squamous Cell Carcinoma	G2	2011		-27519	Alive	TUMOR FREE	407	NA		New Primary Tumor	Oral Cavity	hard palate (right)	252	Complete Remission/Response			0	407	0	407	NA	NA	1	252
TCGA-H7-8502	HNSC	50	MALE	WHITE	Stage IVA	Head & Neck Squamous Cell Carcinoma	G2	2012		-18286	Alive	TUMOR FREE	458	NA					NA	Complete Remission/Response			0	458	0	458	NA	NA	0	458
TCGA-H7-A76A	HNSC	57	MALE	WHITE	Stage IVA	Head & Neck Squamous Cell Carcinoma	G2	2013		-20946	Alive	TUMOR FREE	637	NA					NA	Complete Remission/Response			0	637	0	637	NA	NA	0	637
TCGA-HD-7229	HNSC	60	MALE	WHITE	Stage IVA	Head & Neck Squamous Cell Carcinoma	G3	2011		-22076	Alive	WITH TUMOR	1027	NA		Locoregional Recurrence	Larynx		162	Progressive Disease			0	1027	0	1027	NA	NA	1	162
TCGA-HD-7753	HNSC	62	MALE	BLACK OR AFRICAN AMERICAN	Stage II	Head & Neck Squamous Cell Carcinoma	G2	2011		-22774	Alive	TUMOR FREE	866	NA					NA	Complete Remission/Response			0	866	0	866	0	866	0	866
TCGA-HD-7831	HNSC	74	MALE	WHITE	Stage III	Head & Neck Squamous Cell Carcinoma	G2	2011		-27334	Alive	WITH TUMOR	667	NA		Distant Metastasis	Distant Metastasis	Lung	667	Complete Remission/Response			0	667	0	667	NA	NA	1	667
TCGA-HD-7832	HNSC	52	MALE	WHITE	Stage IVA	Head & Neck Squamous Cell Carcinoma	G2	2011		-19192	Alive	TUMOR FREE	836	NA					NA	Complete Remission/Response			0	836	0	836	NA	NA	0	836
TCGA-HD-A4C1	HNSC	41	FEMALE	BLACK OR AFRICAN AMERICAN	Stage IVA	Head & Neck Squamous Cell Carcinoma	G1	2012		-15096	Alive		11	NA					NA				0	11	0	11	NA	NA	0	11
TCGA-HD-A6HZ	HNSC	79	FEMALE	WHITE	Stage II	Head & Neck Squamous Cell Carcinoma	G2	2012		-29045	Alive	TUMOR FREE	111	NA					NA				0	111	0	111	NA	NA	0	111
TCGA-HD-A6I0	HNSC	56	MALE	WHITE	Stage III	Head & Neck Squamous Cell Carcinoma	G1	2013		-20491	Alive	TUMOR FREE	210	NA					NA	Complete Remission/Response			0	210	0	210	NA	NA	0	210
TCGA-IQ-7630	HNSC	49	MALE	WHITE	Stage III	Head & Neck Squamous Cell Carcinoma	G3	2011		-18131	Alive	TUMOR FREE	485	NA					NA	Complete Remission/Response			0	485	0	485	0	485	0	485
TCGA-IQ-A61G	HNSC	57	MALE	WHITE	Stage IVA	Head & Neck Squamous Cell Carcinoma	G2	2012		-21066	Alive	WITH TUMOR	360	NA			Oral Cavity		249	Progressive Disease			0	360	0	360	NA	NA	1	249
TCGA-IQ-A61H	HNSC	76	MALE	WHITE	Stage II	Head & Neck Squamous Cell Carcinoma	G2	2012		-27990	Alive	TUMOR FREE	1138	NA					NA	Complete Remission/Response			0	1138	0	1138	0	1138	0	1138
TCGA-IQ-A61I	HNSC	63	MALE	BLACK OR AFRICAN AMERICAN	Stage IVA	Head & Neck Squamous Cell Carcinoma	G3	2012		-23035	Dead	TUMOR FREE	NA	2					NA	Complete Remission/Response			1	2	0	2	NA	NA	0	2
TCGA-IQ-A61J	HNSC	54	MALE	WHITE	Stage IVA	Head & Neck Squamous Cell Carcinoma	G1	2012		-19913	Alive	TUMOR FREE	1021	NA					NA	Complete Remission/Response			0	1021	0	1021	NA	NA	0	1021
TCGA-IQ-A6SG	HNSC	61	FEMALE	WHITE	Stage III	Head & Neck Squamous Cell Carcinoma	G2	2013		-22529	Alive	TUMOR FREE	579	NA					NA	Complete Remission/Response			0	579	0	579	0	579	0	579
TCGA-IQ-A6SH	HNSC	55	MALE	BLACK OR AFRICAN AMERICAN	Stage IVC	Head & Neck Squamous Cell Carcinoma	G1	2013		-20109	Alive	TUMOR FREE	471	NA					NA	Complete Remission/Response			0	471	0	471	NA	NA	0	471
TCGA-KU-A66S	HNSC	69	FEMALE	WHITE	Stage III	Head & Neck Squamous Cell Carcinoma Basaloid Type	G2	2012		-25454	Dead	WITH TUMOR	NA	406		Distant Metastasis	Distant Metastasis	Brain Metastasis	389	Complete Remission/Response			1	406	1	406	1	389	1	389
TCGA-KU-A6H7	HNSC	55	FEMALE	WHITE	Stage IVA	Head & Neck Squamous Cell Carcinoma	G2	2013		-20314	Alive	TUMOR FREE	586	NA					NA	Complete Remission/Response			0	586	0	586	NA	NA	0	586
TCGA-KU-A6H8	HNSC	41	MALE	WHITE	Stage I	Head & Neck Squamous Cell Carcinoma	G3	2013		-15066	Dead	WITH TUMOR	NA	327		Locoregional Recurrence	Oral Cavity	Right base of tongue and level 2 a cervical node	110	Progressive Disease			1	327	1	327	NA	NA	1	110
TCGA-MT-A51W	HNSC	52	FEMALE	WHITE	Stage I	Head & Neck Squamous Cell Carcinoma	G2	2012		-19098	Alive	TUMOR FREE	437	NA					NA	Complete Remission/Response			0	437	0	437	0	437	0	437
TCGA-MT-A51X	HNSC	30	MALE	WHITE	Stage IVA	Head & Neck Squamous Cell Carcinoma	G1	2012		-10976	Alive	TUMOR FREE	242	NA					NA				0	242	0	242	NA	NA	0	242
TCGA-MT-A7BN	HNSC	74	MALE	WHITE	Stage IVA	Head & Neck Squamous Cell Carcinoma	G3	2013		-27162	Alive	WITH TUMOR	469	NA		Distant Metastasis	Distant Metastasis	lung	179	Progressive Disease			0	469	0	469	NA	NA	1	179
TCGA-MZ-A5BI	HNSC	53	MALE	WHITE	Stage IVA	Head & Neck Squamous Cell Carcinoma		2008		-19500	Dead		NA	217					NA	Complete Remission/Response			1	217	NA	217	NA	NA	0	217
TCGA-P3-A5Q6	HNSC	49	MALE	WHITE	Stage III	Head & Neck Squamous Cell Carcinoma	G3	2005		-17917	Dead	WITH TUMOR	NA	480			Distant Metastasis	Lung	280	Complete Remission/Response			1	480	1	480	NA	NA	1	280
TCGA-P3-A5QA	HNSC	41	MALE		Stage II	Head & Neck Squamous Cell Carcinoma	G3	2008		-15125	Alive	TUMOR FREE	2182	NA		Locoregional Disease	Oral Cavity	tongue	1601	Complete Remission/Response			0	2182	0	2182	1	1601	1	1601
TCGA-P3-A5QE	HNSC	49	MALE	WHITE	Stage III	Head & Neck Squamous Cell Carcinoma Basaloid Type	G2	2009		-18002	Alive	TUMOR FREE	1559	NA					NA	Complete Remission/Response			0	1559	0	1559	0	1559	0	1559
TCGA-P3-A5QF	HNSC	49	MALE	WHITE	Stage IVA	Head & Neck Squamous Cell Carcinoma	G2	2009		-18035	Dead	WITH TUMOR	NA	330			Distant Metastasis	Lung	140				1	330	1	330	NA	NA	1	140
TCGA-P3-A6SW	HNSC	50	MALE	WHITE	Stage IVA	Head & Neck Squamous Cell Carcinoma Basaloid Type	G3	2005		-18536	Alive	TUMOR FREE	1120	NA					NA	Complete Remission/Response			0	1120	0	1120	NA	NA	0	1120
TCGA-P3-A6SX	HNSC	67	MALE	WHITE	Stage IVA	Head & Neck Squamous Cell Carcinoma	G2	2005		-24715	Dead	TUMOR FREE	NA	1430					NA	Complete Remission/Response			1	1430	0	1430	NA	NA	0	1430
TCGA-P3-A6T4	HNSC	54	MALE	WHITE	Stage IVA	Head & Neck Squamous Cell Carcinoma	G2	2008		-20027	Dead	WITH TUMOR	NA	62					NA	Progressive Disease			1	62	1	62	NA	NA	1	62
TCGA-P3-A6T5	HNSC	79	FEMALE	WHITE	Stage IVA	Head & Neck Squamous Cell Carcinoma	G2	2009		-28977	Dead	WITH TUMOR	NA	882		Locoregional Disease	Oral Cavity		335	Complete Remission/Response			1	882	1	882	NA	NA	1	335
TCGA-P3-A6T8	HNSC	54	MALE	WHITE	Stage IVA	Head & Neck Squamous Cell Carcinoma	G3	2010		-19754	Alive	TUMOR FREE	400	NA					NA	Complete Remission/Response			0	400	0	400	NA	NA	0	400
TCGA-QK-A652	HNSC	60	MALE	WHITE	Stage II	Head & Neck Squamous Cell Carcinoma	G2	2013		-22023	Alive	TUMOR FREE	645	NA					NA	Complete Remission/Response			0	645	0	645	0	645	0	645
TCGA-QK-A6IF	HNSC	61	MALE	WHITE	Stage IVA	Head & Neck Squamous Cell Carcinoma	GX	2013		-22463	Alive	TUMOR FREE	704	NA		Distant Metastasis	Distant Metastasis	pulmonary nodules throughout both lungs	502	Complete Remission/Response			0	704	0	704	NA	NA	1	502
TCGA-QK-A6IG	HNSC	69	MALE	WHITE	Stage II	Head & Neck Squamous Cell Carcinoma	G2	2013		-25334	Dead	WITH TUMOR	NA	222		Locoregional Disease	Cervical Lymph Nodes	Left level Ib lymph node	142	Progressive Disease			1	222	1	222	NA	NA	1	142
TCGA-QK-A6IH	HNSC	65	FEMALE	WHITE	Stage IVA	Head & Neck Squamous Cell Carcinoma	G2	2013		-23936	Alive	WITH TUMOR	653	NA			Distant Metastasis	Lung	228	Progressive Disease			0	653	0	653	NA	NA	1	228
TCGA-QK-A6II	HNSC	52	MALE	WHITE	Stage III	Head & Neck Squamous Cell Carcinoma	G2	2013		-19113	Dead	WITH TUMOR	NA	284		Locoregional Recurrence	Cervical Lymph Nodes		176	Progressive Disease			1	284	1	284	NA	NA	1	176
TCGA-QK-A6V9	HNSC	56	MALE	WHITE	Stage II	Head & Neck Squamous Cell Carcinoma	G2	2012		-20461	Alive	TUMOR FREE	833	NA					NA	Complete Remission/Response			0	833	0	833	0	833	0	833
TCGA-QK-A6VC	HNSC	62	FEMALE	BLACK OR AFRICAN AMERICAN	Stage IVA	Head & Neck Squamous Cell Carcinoma	G2	2013		-22865	Alive	TUMOR FREE	600	NA					NA	Complete Remission/Response			0	600	0	600	NA	NA	0	600
TCGA-QK-A8Z7	HNSC	59	MALE	BLACK OR AFRICAN AMERICAN	Stage IVA	Head & Neck Squamous Cell Carcinoma Basaloid Type		2013		-21711	Alive	TUMOR FREE	392	NA					NA	Complete Remission/Response			0	392	0	392	NA	NA	0	392
TCGA-QK-A8Z8	HNSC	60	FEMALE	BLACK OR AFRICAN AMERICAN	Stage IVC	Head & Neck Squamous Cell Carcinoma	G2	2013		-22107	Dead	WITH TUMOR	NA	171					NA				1	171	1	171	NA	NA	1	171
TCGA-QK-A8ZA	HNSC	60	MALE	BLACK OR AFRICAN AMERICAN	Stage IVA	Head & Neck Squamous Cell Carcinoma	G2	2013		-21979	Dead	TUMOR FREE	NA	371					NA	Complete Remission/Response			1	371	0	371	NA	NA	0	371
TCGA-QK-A8ZB	HNSC	68	MALE	BLACK OR AFRICAN AMERICAN	Stage IVA	Head & Neck Squamous Cell Carcinoma	G2	2013		-25192	Alive	TUMOR FREE	542	NA					NA	Complete Remission/Response			0	542	0	542	NA	NA	0	542
TCGA-QK-AA3K	HNSC	60	MALE	BLACK OR AFRICAN AMERICAN	Stage IVA	Head & Neck Squamous Cell Carcinoma	G2	2013		-22093	Alive		253	NA					NA				0	253	0	253	NA	NA	0	253
TCGA-T2-A6WZ	HNSC	53	MALE	WHITE	Stage IVA	Head & Neck Squamous Cell Carcinoma	G2	2012		-19397	Dead	WITH TUMOR	NA	484		Distant Metastasis	Distant Metastasis	bilateral pulmonary nodules	229	Stable Disease			1	484	1	484	NA	NA	1	229
TCGA-T2-A6X2	HNSC	82	MALE	WHITE	Stage III	Head & Neck Squamous Cell Carcinoma	G1	2011		-30013	Alive	TUMOR FREE	987	NA					NA	Complete Remission/Response			0	987	0	987	0	987	0	987
TCGA-TN-A7HJ	HNSC	51	MALE	WHITE	Stage III	Head & Neck Squamous Cell Carcinoma	G2	2013		-18809	Alive	TUMOR FREE	403	NA					NA	Complete Remission/Response			0	403	0	403	NA	NA	0	403
TCGA-UF-A719	HNSC	54	MALE		Stage III	Head & Neck Squamous Cell Carcinoma	G1	2009		-19797	Alive	TUMOR FREE	1663	NA					NA	Complete Remission/Response			0	1663	0	1663	0	1663	0	1663
TCGA-UF-A71A	HNSC	67	MALE	WHITE	Stage IVA	Head & Neck Squamous Cell Carcinoma	G1	2009		-24623	Dead	WITH TUMOR	NA	86					NA	Complete Remission/Response			1	86	1	86	NA	NA	1	86
TCGA-UF-A71B	HNSC	50	MALE	WHITE	Stage IVA	Head & Neck Squamous Cell Carcinoma	G2	2010		-18404	Alive	TUMOR FREE	1506	NA					NA	Complete Remission/Response			0	1506	0	1506	NA	NA	0	1506
TCGA-UF-A7JF	HNSC	80	MALE	WHITE	Stage IVA	Head & Neck Squamous Cell Carcinoma	G2	2010		-29468	Alive	TUMOR FREE	1686	NA					NA	Complete Remission/Response			0	1686	0	1686	NA	NA	0	1686
TCGA-UF-A7JH	HNSC	59	MALE	BLACK OR AFRICAN AMERICAN	Stage IVA	Head & Neck Squamous Cell Carcinoma	G1	2012		-21558	Alive	TUMOR FREE	896	NA					NA	Complete Remission/Response			0	896	0	896	NA	NA	0	896
TCGA-UF-A7JO	HNSC	79	FEMALE	WHITE	Stage IVA	Head & Neck Squamous Cell Carcinoma	G2	2009		-28951	Dead	WITH TUMOR	NA	631		Locoregional Disease	Oral Cavity	Floor of mouth	525	Complete Remission/Response			1	631	1	631	NA	NA	1	525
TCGA-UP-A6WW	HNSC	58	MALE	WHITE	Stage IVA	Head & Neck Squamous Cell Carcinoma	G2	2013		-21427	Alive	TUMOR FREE	518	NA					NA	Complete Remission/Response			0	518	0	518	NA	NA	0	518
TCGA-WA-A7GZ	HNSC	58	MALE	WHITE	Stage II	Head & Neck Squamous Cell Carcinoma	G2	2012		-21207	Dead	TUMOR FREE	NA	625					NA	Complete Remission/Response			1	625	0	625	0	625	0	625
TCGA-WA-A7H4	HNSC	69	MALE	WHITE	Stage II	Head & Neck Squamous Cell Carcinoma	G3	2013		-25363	Alive	TUMOR FREE	443	NA					NA	Complete Remission/Response			0	443	0	443	0	443	0	443
